# Supplementary material for: Peer review of the pesticide risk assessment of the active substance glyphosate
Source: PubMed Central journal article supplement (PMC10369247; doi:10.2903/j.efsa.2023.8164), 2023-07-26
Supplement: EFS2-21-e08164-s001.pdf [file EFS2-21-e08164-s001.pdf]

Annex to: Conclusion on the peer review of the pesticide risk assessment of the active substance glyphosate. doi:10.2903/j.efsa.2023.8164

© 2023 Wiley-VCH Verlag GmbH & Co. KGaA on behalf of the European Food Safety Authority.

## Appendix B – List of end points for the active substance and the formulation for representative uses

### Identity, Physical and Chemical Properties, Details of Uses, Further Information (Regulation (EU) N° 283/2013, Annex Part A, points 1.3 and 3.2)

|                                    |                                    |
|------------------------------------|------------------------------------|
| Active substance (ISO Common Name) | Glyphosate                         |
| Function ( <i>e.g.</i> fungicide)  | Herbicide                          |
| Rapporteur Member State            | The Assessment Group on Glyphosate |
| Co-rapporteur Member State         | None                               |

### Identity (Regulation (EU) N° 283/2013, Annex Part A, point 1)

|                                                                                                                                           |                                                                                                                                                                                                       |
|-------------------------------------------------------------------------------------------------------------------------------------------|-------------------------------------------------------------------------------------------------------------------------------------------------------------------------------------------------------|
| Chemical name (IUPAC)                                                                                                                     | <i>N</i> -(phosphonomethyl)glycine                                                                                                                                                                    |
| Chemical name (CA)                                                                                                                        | Glycine, <i>N</i> -(phosphonomethyl)-                                                                                                                                                                 |
| CIPAC No                                                                                                                                  | 284                                                                                                                                                                                                   |
| CAS No                                                                                                                                    | 1071-83-6                                                                                                                                                                                             |
| EC No (EINECS or ELINCS)                                                                                                                  | 213-997-4                                                                                                                                                                                             |
| FAO Specification (including year of publication)                                                                                         | 284/TC (2016) covering technical material of Monsanto, Cheminova, Syngenta and Helm<br>glyphosate: $\geq 950$ g/kg<br>formaldehyde: maximum 1.3 g/kg<br><i>N</i> -nitroso-glyphosate: maximum 1 mg/kg |
| Minimum purity of the active substance as manufactured                                                                                    | 950 g/kg                                                                                                                                                                                              |
| Identity of relevant impurities (of toxicological, ecotoxicological and/or environmental concern) in the active substance as manufactured | formaldehyde < 1 g/kg<br><i>N</i> -nitroso-glyphosate (NNG) < 1 mg/kg<br>formic acid $\leq 4$ g/kg<br>triethylamine $\leq 2$ g/kg<br>Open for one impurity (data gap)                                 |

Location of the (proposed) reference specification (for significant impurities)

RAR Volume 4 Equivalence (2023)

An updated reference specification compared to RAR 2015 was proposed, however it is not concluded.

Molecular formula

$C_3H_8NO_5P$

Molar mass

169.1 g/mol

Structural formula

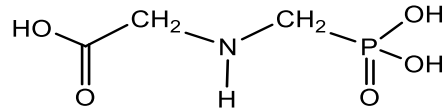

**Physical and chemical properties (Regulation (EU) N° 283/2013, Annex Part A, point 2)**

|                                                                     |                                                                                                                                                                                                                                                                           |
|---------------------------------------------------------------------|---------------------------------------------------------------------------------------------------------------------------------------------------------------------------------------------------------------------------------------------------------------------------|
| Melting point (state purity)                                        | 189.5 °C (99.9 %)                                                                                                                                                                                                                                                         |
| Boiling point (state purity)                                        | Not applicable because glyphosate decomposes during melting                                                                                                                                                                                                               |
| Temperature of decomposition (state purity)                         | 200 °C (99.6 %)                                                                                                                                                                                                                                                           |
| Appearance (state purity)                                           | White solid (99.6 %)                                                                                                                                                                                                                                                      |
| Vapour pressure (state temperature, state purity)                   | $1.31 \times 10^{-5}$ Pa at 25 °C (98.6 %)                                                                                                                                                                                                                                |
| Henry's law constant (state temperature)                            | $< 2.21 \times 10^{-8}$ Pa m <sup>3</sup> mol <sup>-1</sup> (25 °C)                                                                                                                                                                                                       |
| Solubility in water (state temperature, state purity and pH)        | Solubility at 20 °C (99.9 %)<br>> 100 g/L (pH 5)<br>> 100 g/L (pH 7)<br>171 g/L (pH 9)<br><br>10.5 g/L under un-buffered water (pH 1.90 – 1.98) (99.5 %)                                                                                                                  |
| Solubility in organic solvents (state temperature, state purity)    | Solubility at 20 °C (96.9 %)<br>acetone < 0.6 mg/L<br>1,2-dichloroethane < 0.6 mg/L<br>ethyl acetate < 0.6 mg/L<br>heptane < 0.6 mg/L<br>methanol 10 mg/L<br>octan-1-ol < 0.6 mg/L<br>xylenes < 0.6 mg/L<br>acetonitrile 0.8 mg/L                                         |
| Surface tension (state concentration and temperature, state purity) | (90 % saturated solution) 73 mN/m at 20°C (98.6%)                                                                                                                                                                                                                         |
| Partition coefficient (state temperature, pH and purity)            | (99.9%)<br>Log Pow = -5.39 at 25 °C (at pH buffers at 5)<br>Log Pow = -6.28 at 25 °C (at pH buffers at 7)<br>Log Pow = -5.83 at 25 °C (at pH buffers at 9)                                                                                                                |
| Dissociation constant (state purity)                                | pKa <sub>1</sub> = 2.34 (99 %)<br>pKa <sub>1</sub> = 5.73 (99 %)                                                                                                                                                                                                          |
| UV/VIS absorption (max.) incl. ε (state purity, pH)                 | Aqueous solution (97.7 %):<br>ε at 200 (nm):<br>122 L mol <sup>-1</sup> cm <sup>-1</sup> (pH 7.19)<br>760 L mol <sup>-1</sup> cm <sup>-1</sup> (pH 1.99)<br>712 L mol <sup>-1</sup> cm <sup>-1</sup> (pH 10.29)<br>ε at 290 nm: < 10 L mol <sup>-1</sup> cm <sup>-1</sup> |
| Flammability (state purity)                                         | glyphosate is not flammable substance (97.7 %)                                                                                                                                                                                                                            |
| Explosive properties (state purity)                                 | glyphosate is not explosive (96.0 %)                                                                                                                                                                                                                                      |

Oxidising properties (state purity)

glyphosate technical material is not an oxidising substance (96.9 %)

**Summary of representative uses evaluated, for which all risk assessments needed to be completed (360 g/L of glyphosate as isopropylammonium salt (486 g/L))**

**(Regulation (EU) N° 284/2013, Annex Part A, points 3, 4)**

| Crop and/or situation (a)                                                                                                                                                                  | Member State or Country | Product name | F G or I (b) | Pests or Group of pests controlled (c)                                                                   | Preparation |                | Application                     |                                                     |                    |                                    | Application rate per treatment |                    |                        | PHI (days) (m) | Remarks                                                                                                                                                                                                                                                                       |
|--------------------------------------------------------------------------------------------------------------------------------------------------------------------------------------------|-------------------------|--------------|--------------|----------------------------------------------------------------------------------------------------------|-------------|----------------|---------------------------------|-----------------------------------------------------|--------------------|------------------------------------|--------------------------------|--------------------|------------------------|----------------|-------------------------------------------------------------------------------------------------------------------------------------------------------------------------------------------------------------------------------------------------------------------------------|
|                                                                                                                                                                                            |                         |              |              |                                                                                                          | Type (d-f)  | Conc. a.s. (i) | method kind (f-h)               | range of growth stages & season (j)                 | number min-max (k) | Interval between application (min) | kg a.s./hL min-max (l)         | Water L/ha min-max | kg a.s./ha min-max (l) |                |                                                                                                                                                                                                                                                                               |
| <b>PRE-SOWING, PRE-PLANTING, PRE-EMERGENCE</b>                                                                                                                                             |                         |              |              |                                                                                                          |             |                |                                 |                                                     |                    |                                    |                                |                    |                        |                |                                                                                                                                                                                                                                                                               |
| Root vegetable plants (NNNVW) & tuberous plants (NNNZK), bulb plants (NNNZJ), fruit-vegetable plants (NNNVF), Brassica (1BRSG), leaf and stem vegetable plants (NNNVL), Sugar beet (BEAVA) | EU                      | MON 52276    | F            | Emerged annual weeds (3ANMNT, 3ANDIT), emerged perennial and biennial weeds (3PEDIT, 3PEMNT) (BBCH > 13) | SL          | 360 g/L        | Tractor mounted broadcast spray | Pre-sowing, Pre-planting, Pre-emergence of the crop | 1-1                | NA                                 | 0.36 - 1.44                    | 100-400            | 1.44                   | N/A            | <p><b>Use No. 1a</b></p> <p>Also applicable to renovation / change of land use applications.</p> <p>Application to 100 % of the field.<br/>Use at least 75 % drift reducing nozzles.</p> <p>Maximum application rate of 1.44 kg as/ha glyphosate in any 12 months period.</p> |

| Crop and/or situation (a)                                                                                                                                                                  | Member State or Country | Product name | F G or I (b) | Pests or Group of pests controlled (c)                                                                    | Preparation |                | Application                     |                                                     |                    |                                    | Application rate per treatment |                    |                        | PHI (days) (m) | Remarks                                                                                                                                                                                                                                                                   |
|--------------------------------------------------------------------------------------------------------------------------------------------------------------------------------------------|-------------------------|--------------|--------------|-----------------------------------------------------------------------------------------------------------|-------------|----------------|---------------------------------|-----------------------------------------------------|--------------------|------------------------------------|--------------------------------|--------------------|------------------------|----------------|---------------------------------------------------------------------------------------------------------------------------------------------------------------------------------------------------------------------------------------------------------------------------|
|                                                                                                                                                                                            |                         |              |              |                                                                                                           | Type (d-f)  | Conc. a.s. (i) | method kind (f-h)               | range of growth stages & season (j)                 | number min-max (k) | Interval between application (min) | kg a.s./hL min-max (l)         | Water L/ha min-max | kg a.s./ha min-max (l) |                |                                                                                                                                                                                                                                                                           |
| Root vegetable plants (NNNVW) & tuberous plants (NNNZK), bulb plants (NNNZJ), fruit-vegetable plants (NNNVF), Brassica (1BRSG), leaf and stem vegetable plants (NNNVL), Sugar beet (BEAVA) | EU                      | MON 52276    | F            | Emerged annual weeds (3ANMNT, 3ANDIT), emerged perennial and biennial weeds (3PEDIT, 3PEMNT) (BBCH 13-21) | SL          | 360 g/L        | Tractor mounted broadcast spray | Pre-sowing, Pre-planting, Pre-emergence of the crop | 1-1                | NA                                 | 0.27 - 1.08                    | 100-400            | 1.08                   | N/A            | <p><b>Use No. 1b</b></p> <p>Also applicable to renovation / change of land use applications.</p> <p>Application to 100 % of the field. Use at least 75 % drift reducing nozzles.</p> <p>Maximum application rate of 1.08 kg as/ha glyphosate in any 12 months period.</p> |
| Root vegetable plants (NNNVW) & tuberous plants (NNNZK), bulb plants (NNNZJ), fruit-vegetable plants (NNNVF), Brassica (1BRSG), leaf and stem vegetable plants (NNNVL), Sugar beet (BEAVA) | EU                      | MON 52276    | F            | Emerged annual weeds (3ANMNT, 3ANDIT)                                                                     | SL          | 360 g/L        | Tractor mounted broadcast spray | Pre-sowing, Pre-planting, Pre-emergence of the crop | 1-1                | NA                                 | 0.18 - 0.72                    | 100-400            | 0.72                   | N/A            | <p><b>Use No. 1c</b></p> <p>Also applicable to renovation / change of land use applications.</p> <p>Application to 100 % of the field. Use at least 75 % drift reducing nozzles.</p> <p>Maximum application rate of 0.72 kg as/ha glyphosate in any 12 months period.</p> |
| <b>POST-HARVEST, PRE-SOWING, PRE-PLANTING</b>                                                                                                                                              |                         |              |              |                                                                                                           |             |                |                                 |                                                     |                    |                                    |                                |                    |                        |                |                                                                                                                                                                                                                                                                           |

| Crop and/or situation (a)                                                                                                                                                                  | Member State or Country | Product name | F G or I (b) | Pests or Group of pests controlled (c)                                                       | Preparation |                | Application                     |                                        |                    |                                    | Application rate per treatment |                    |                        | PHI (days) (m) | Remarks                                                                                                                                                                                                                                                                                                                                                                                             |
|--------------------------------------------------------------------------------------------------------------------------------------------------------------------------------------------|-------------------------|--------------|--------------|----------------------------------------------------------------------------------------------|-------------|----------------|---------------------------------|----------------------------------------|--------------------|------------------------------------|--------------------------------|--------------------|------------------------|----------------|-----------------------------------------------------------------------------------------------------------------------------------------------------------------------------------------------------------------------------------------------------------------------------------------------------------------------------------------------------------------------------------------------------|
|                                                                                                                                                                                            |                         |              |              |                                                                                              | Type (d-f)  | Conc. a.s. (i) | method kind (f-h)               | range of growth stages & season (j)    | number min-max (k) | Interval between application (min) | kg a.s./hL min-max (l)         | Water L/ha min-max | kg a.s./ha min-max (l) |                |                                                                                                                                                                                                                                                                                                                                                                                                     |
| Root vegetable plants (NNNVW) & tuberous plants (NNNZK), bulb plants (NNNZJ), fruit-vegetable plants (NNNVF), Brassica (1BRSG), leaf and stem vegetable plants (NNNVL), Sugar beet (BEAVA) | EU                      | MON 52276    | F            | Emerged annual weeds (3ANMNT, 3ANDIT), emerged perennial and biennial weeds (3PEDIT, 3PEMNT) | SL          | 360 g/L        | Tractor mounted broadcast spray | Post-harvest, pre-sowing, pre-planting | 1-2                | 28 days                            | 0.27 - 1.44                    | 100-400            | 1.08 - 1.44            | N/A            | <p><b>Use No. 2a</b></p> <p>Application to existing row cropland after harvest for removal of remaining crop / stubble and for control of actively growing weeds and mature annual weeds with hardened-off surface</p> <p>Application to 100 % of the field.<br/>Use at least 75 % drift reducing nozzles.</p> <p>Maximum application rate of 2.16 kg as/ha glyphosate in any 12 months period.</p> |

| Crop and/or situation (a)                                                                                                                                                                  | Member State or Country | Product name | F G or I (b) | Pests or Group of pests controlled (c)                                                       | Preparation |                | Application                     |                                        |                    |                                    | Application rate per treatment |                    |                        | PHI (days) (m) | Remarks                                                                                                                                                                                                                                                                                                                                                  |
|--------------------------------------------------------------------------------------------------------------------------------------------------------------------------------------------|-------------------------|--------------|--------------|----------------------------------------------------------------------------------------------|-------------|----------------|---------------------------------|----------------------------------------|--------------------|------------------------------------|--------------------------------|--------------------|------------------------|----------------|----------------------------------------------------------------------------------------------------------------------------------------------------------------------------------------------------------------------------------------------------------------------------------------------------------------------------------------------------------|
|                                                                                                                                                                                            |                         |              |              |                                                                                              | Type (d-f)  | Conc. a.s. (i) | method kind (f-h)               | range of growth stages & season (j)    | number min-max (k) | Interval between application (min) | kg a.s./hL min-max (l)         | Water L/ha min-max | kg a.s./ha min-max (l) |                |                                                                                                                                                                                                                                                                                                                                                          |
| Root vegetable plants (NNNVW) & tuberous plants (NNNZK), bulb plants (NNNZJ), fruit-vegetable plants (NNNVF), Brassica (1BRSG), leaf and stem vegetable plants (NNNVL), Sugar beet (BEAVA) | EU                      | MON 52276    | F            | Emerged annual weeds (3ANMNT, 3ANDIT), emerged perennial and biennial weeds (3PEDIT, 3PEMNT) | SL          | 360 g/L        | Tractor mounted broadcast spray | Post-harvest, pre-sowing, pre-planting | 1-3                | 28 days                            | 0.18 - 1.08                    | 100-400            | 0.72 - 1.08            | N/A            | <p><b>Use No. 2b</b></p> <p>Application to existing row cropland after harvest for removal of remaining crop / stubble and for control of actively growing weeds.</p> <p>Application to 100 % of the field.<br/>Use at least 75 % drift reducing nozzles.</p> <p>Maximum application rate of 2.16 kg as/ha glyphosate in any 12 months period.</p>       |
| Root vegetable plants (NNNVW) & tuberous plants (NNNZK), bulb plants (NNNZJ), fruit-vegetable plants (NNNVF), Brassica (1BRSG), leaf and stem vegetable plants (NNNVL), Sugar beet (BEAVA) | EU                      | MON 52276    | F            | Emerged annual weeds (3ANMNT, 3ANDIT)                                                        | SL          | 360 g/L        | Tractor mounted broadcast spray | Post-harvest, pre-sowing, pre-planting | 1-3                | 28 days                            | 0.18 - 0.72                    | 100-400            | 0.72                   | N/A            | <p><b>Use No. 2c</b></p> <p>Application to existing row cropland after harvest for removal of remaining crop / stubble and for control of actively growing annual weeds</p> <p>Application to 100 % of the field.<br/>Use at least 75 % drift reducing nozzles.</p> <p>Maximum application rate of 2.16 kg as/ha glyphosate in any 12 months period.</p> |



| Crop and/or situation (a)                                                                                                                                                                  | Member State or Country | Product name | F G or I (b) | Pests or Group of pests controlled (c) | Preparation |                | Application                     |                                        |                    |                                    | Application rate per treatment |                    |                        | PHI (days) (m) | Remarks                                                                                                                                                                                                                                                                         |
|--------------------------------------------------------------------------------------------------------------------------------------------------------------------------------------------|-------------------------|--------------|--------------|----------------------------------------|-------------|----------------|---------------------------------|----------------------------------------|--------------------|------------------------------------|--------------------------------|--------------------|------------------------|----------------|---------------------------------------------------------------------------------------------------------------------------------------------------------------------------------------------------------------------------------------------------------------------------------|
|                                                                                                                                                                                            |                         |              |              |                                        | Type (d-f)  | Conc. a.s. (i) | method kind (f-h)               | range of growth stages & season (j)    | number min-max (k) | Interval between application (min) | kg a.s./hL min-max (l)         | Water L/ha min-max | kg a.s./ha min-max (l) |                |                                                                                                                                                                                                                                                                                 |
| Root vegetable plants (NNNVW) & tuberous plants (NNNZK), bulb plants (NNNZJ), fruit-vegetable plants (NNNVF), Brassica (1BRSG), leaf and stem vegetable plants (NNNVL), Sugar beet (BEAVA) | EU                      | MON 52276    | F            | Cereal volunteers (NNNGA)              | SL          | 360 g/L        | Tractor mounted broadcast spray | Post-harvest, pre-sowing, pre-planting | 1                  | NA                                 | 0.135 - 0.54                   | 100-400            | 0.54                   | N/A            | <p><b>Use No. 3a</b></p> <p>Application to existing row cropland after harvest for removal of cereal volunteers.</p> <p>Maximum application rate of 0.54 kg as/ha glyphosate in any 12 months period.</p> <p>Use at least 75% drift reducing nozzles</p>                        |
| Root vegetable plants (NNNVW) & tuberous plants (NNNZK), bulb plants (NNNZJ), fruit-vegetable plants (NNNVF), Brassica (1BRSG), leaf and stem vegetable plants (NNNVL), Sugar beet (BEAVA) | EU                      | MON 52276    | F            | Cereal volunteers (NNNGA)              | SL          | 360 g/L        | Tractor mounted broadcast spray | Post-harvest, pre-sowing, pre-planting | 1                  | NA                                 | 0.135 - 0.54                   | 100-400            | 0.54                   | N/A            | <p><b>Use No. 3b</b></p> <p>Application to existing row cropland after harvest for removal of cereal volunteers once every three years.</p> <p>Maximum application rate of 0.54 kg as/ha glyphosate in any 36 months period.</p> <p>Use at least 75% drift reducing nozzles</p> |

| Crop and/or situation (a)                                                                                                                        | Member State or Country | Product name | F G or I (b) | Pests or Group of pests controlled (c)                                                       | Preparation |                | Application                                                      |                                             |                    |                                    | Application rate per treatment |                    |                        | PHI (days) (m) | Remarks                                                                                                                                                                                                                                                                                                                                                                                                                                                                                                |
|--------------------------------------------------------------------------------------------------------------------------------------------------|-------------------------|--------------|--------------|----------------------------------------------------------------------------------------------|-------------|----------------|------------------------------------------------------------------|---------------------------------------------|--------------------|------------------------------------|--------------------------------|--------------------|------------------------|----------------|--------------------------------------------------------------------------------------------------------------------------------------------------------------------------------------------------------------------------------------------------------------------------------------------------------------------------------------------------------------------------------------------------------------------------------------------------------------------------------------------------------|
|                                                                                                                                                  |                         |              |              |                                                                                              | Type (d-f)  | Conc. a.s. (i) | method kind (f-h)                                                | range of growth stages & season (j)         | number min-max (k) | Interval between application (min) | kg a.s./hL min-max (l)         | Water L/ha min-max | kg a.s./ha min-max (l) |                |                                                                                                                                                                                                                                                                                                                                                                                                                                                                                                        |
| <b>POST-EMERGENCE OF WEEDS</b>                                                                                                                   |                         |              |              |                                                                                              |             |                |                                                                  |                                             |                    |                                    |                                |                    |                        |                |                                                                                                                                                                                                                                                                                                                                                                                                                                                                                                        |
| Orchard crops: citrus (3CITC), stone (3STFC) and pome (3PMFC) fruits, kiwi (ATIDE), nut crops (3NUTC), banana (MUBPA), and table olives (OLVEU)* | EU                      | MON 52276    | F            | Emerged annual weeds (3ANMNT, 3ANDIT), emerged perennial and biennial weeds (3PEDIT, 3PEMNT) | SL          | 360 g/L        | Ground directed, fully-shielded (hooded) spray, band application | Post-emergence of weeds throughout the year | 1-2                | 28 days                            | 0.27 - 1.44                    | 100-400            | 1.08 - 1.44            | 7              | <p><b>Use No. 4a</b></p> <p>Avoid crop contamination during treatment.</p> <p>Maximum application rate of 2.88 kg as/ha treated area glyphosate in any 12 months period.</p> <p>Use at least 75% drift reducing nozzles.</p> <p>Band application in the rows below the trees or as spot treatments. The treated area represents not more than 50 % of the total orchard area. The application rate with reference to the total orchard surface area is not more than 50 % of the stated dose rate.</p> |
| Orchard crops: citrus (3CITC), stone (3STFC) and pome (3PMFC) fruits, kiwi (ATIDE), nut crops (3NUTC), banana (MUBPA), and table olives (OLVEU)* | EU                      | MON 52276    | F            | Emerged annual weeds (3ANMNT, 3ANDIT), emerged perennial and biennial weeds (3PEDIT, 3PEMNT) | SL          | 360 g/L        | Ground directed, fully-shielded (hooded) spray, band application | Post-emergence of weeds throughout the year | 1-3                | 28 days                            | 0.18 - 1.08                    | 100-400            | 0.72 - 1.08            | 7              | <p><b>Use No. 4b</b></p> <p>Avoid crop contamination during treatment.</p> <p>Maximum application rate of 2.88 kg as/ha treated area glyphosate in any 12 months period.</p> <p>Use at least 75% drift reducing nozzles.</p> <p>Band application in the rows below the trees or as spot treatments. The treated area represents not more than 50 % of the total orchard area. The application rate with reference to the total orchard surface area is not more than 50 % of the stated dose rate.</p> |

| Crop and/or situation (a)                                                                                                                        | Member State or Country | Product name | F G or I (b) | Pests or Group of pests controlled (c)                                                       | Preparation |                | Application                                                      |                                             |                    |                                    | Application rate per treatment |                    |                        | PHI (days) (m) | Remarks                                                                                                                                                                                                                                                                                                                                                                                                                                                                                                       |
|--------------------------------------------------------------------------------------------------------------------------------------------------|-------------------------|--------------|--------------|----------------------------------------------------------------------------------------------|-------------|----------------|------------------------------------------------------------------|---------------------------------------------|--------------------|------------------------------------|--------------------------------|--------------------|------------------------|----------------|---------------------------------------------------------------------------------------------------------------------------------------------------------------------------------------------------------------------------------------------------------------------------------------------------------------------------------------------------------------------------------------------------------------------------------------------------------------------------------------------------------------|
|                                                                                                                                                  |                         |              |              |                                                                                              | Type (d-f)  | Conc. a.s. (i) | method kind (f-h)                                                | range of growth stages & season (j)         | number min-max (k) | Interval between application (min) | kg a.s./hL min-max (l)         | Water L/ha min-max | kg a.s./ha min-max (l) |                |                                                                                                                                                                                                                                                                                                                                                                                                                                                                                                               |
| Orchard crops: citrus (3CITC), stone (3STFC) and pome (3PMFC) fruits, kiwi (ATIDE), nut crops (3NUTC), banana (MUBPA), and table olives (OLVEU)* | EU                      | MON 52276    | F            | Emerged annual weeds (3ANMNT, 3ANDIT)                                                        | SL          | 360 g/L        | Ground directed, fully-shielded (hooded) spray, band application | Post-emergence of weeds throughout the year | 1-3                | 28 days                            | 0.18 - 0.72                    | 100-400            | 0.72                   | 7              | <p><b>Use No. 4c</b></p> <p>Avoid crop contamination during treatment.</p> <p>Maximum application rate of 2.16 kg as/ha treated area glyphosate in any 12 months period.</p> <p>Use at least 75% drift reducing nozzles.</p> <p>Band application in the rows below the trees or as spot treatments. The treated area represents not more than 50 % of the total orchard area. The application rate with reference to the total orchard surface area is not more than 50 % of the stated dose rate.</p>        |
| Vines (VITVI) (table and wine grape, leaves not intended for human consumption)                                                                  | EU                      | MON 52276    | F            | Emerged annual weeds (3ANMNT, 3ANDIT), emerged perennial and biennial weeds (3PEDIT, 3PEMNT) | SL          | 360 g/L        | Ground directed, fully-shielded (hooded) spray, band application | Post-emergence of weeds throughout the year | 1-2                | 28 days                            | 0.27 - 1.44                    | 100-400            | 1.08 - 1.44            | 7              | <p><b>Use No. 5a</b></p> <p>Avoid crop contamination during treatment.</p> <p>Maximum application rate of 2.88 kg as/ha treated area glyphosate in any 12 months period.</p> <p>Use at least 75% drift reducing nozzles.</p> <p>Band application in the rows below the vine stock or as spot treatments. The treated area represents not more than 50 % of the total vineyard area. The application rate with reference to the total vineyard surface area is not more than 50 % of the stated dose rate.</p> |

| Crop and/or situation (a)                                                       | Member State or Country | Product name | F G or I (b) | Pests or Group of pests controlled (c)                                                       | Preparation |                | Application                                                      |                                             |                    |                                    | Application rate per treatment |                    |                        | PHI (days) (m) | Remarks                                                                                                                                                                                                                                                                                                                                                                                                                                                                                                       |
|---------------------------------------------------------------------------------|-------------------------|--------------|--------------|----------------------------------------------------------------------------------------------|-------------|----------------|------------------------------------------------------------------|---------------------------------------------|--------------------|------------------------------------|--------------------------------|--------------------|------------------------|----------------|---------------------------------------------------------------------------------------------------------------------------------------------------------------------------------------------------------------------------------------------------------------------------------------------------------------------------------------------------------------------------------------------------------------------------------------------------------------------------------------------------------------|
|                                                                                 |                         |              |              |                                                                                              | Type (d-f)  | Conc. a.s. (i) | method kind (f-h)                                                | range of growth stages & season (j)         | number min-max (k) | Interval between application (min) | kg a.s./hL min-max (l)         | Water L/ha min-max | kg a.s./ha min-max (l) |                |                                                                                                                                                                                                                                                                                                                                                                                                                                                                                                               |
| Vines (VITVI) (table and wine grape, leaves not intended for human consumption) | EU                      | MON 52276    | F            | Emerged annual weeds (3ANMNT, 3ANDIT), emerged perennial and biennial weeds (3PEDIT, 3PEMNT) | SL          | 360 g/L        | Ground directed, fully-shielded (hooded) spray, band application | Post-emergence of weeds throughout the year | 1-3                | 28 days                            | 0.18 - 1.08                    | 100-400            | 0.72 - 1.08            | 7              | <p><b>Use No. 5b</b></p> <p>Avoid crop contamination during treatment.</p> <p>Maximum application rate of 2.88 kg as/ha treated area glyphosate in any 12 months period.</p> <p>Use at least 75% drift reducing nozzles.</p> <p>Band application in the rows below the vine stock or as spot treatments. The treated area represents not more than 50 % of the total vineyard area. The application rate with reference to the total vineyard surface area is not more than 50 % of the stated dose rate.</p> |
| Vines (VITVI) (table and wine grape, leaves not intended for human consumption) | EU                      | MON 52276    | F            | Emerged annual weeds (3ANMNT, 3ANDIT)                                                        | SL          | 360 g/L        | Ground directed, fully-shielded (hooded) spray, band application | Post-emergence of weeds throughout the year | 1-3                | 28 days                            | 0.18 - 0.72                    | 100-400            | 0.72                   | 7              | <p><b>Use No. 5c</b></p> <p>Avoid crop contamination during treatment.</p> <p>Maximum application rate of 2.16 kg as/ha treated area glyphosate in any 12 months period.</p> <p>Use at least 75% drift reducing nozzles.</p> <p>Band application in the rows below the vine stock or as spot treatments. The treated area represents not more than 50 % of the total vineyard area. The application rate with reference to the total vineyard surface area is not more than 50 % of the stated dose rate.</p> |

| Crop and/or situation (a)                                                                                                                                                      | Member State or Country | Product name | F G or I (b) | Pests or Group of pests controlled (c)                                                       | Preparation |                | Application                                                           |                                     |                    |                                    | Application rate per treatment |                    |                        | PHI (days) (m) | Remarks                                                                                                                                                                                                                                                                                                                                                                                                                                                                           |
|--------------------------------------------------------------------------------------------------------------------------------------------------------------------------------|-------------------------|--------------|--------------|----------------------------------------------------------------------------------------------|-------------|----------------|-----------------------------------------------------------------------|-------------------------------------|--------------------|------------------------------------|--------------------------------|--------------------|------------------------|----------------|-----------------------------------------------------------------------------------------------------------------------------------------------------------------------------------------------------------------------------------------------------------------------------------------------------------------------------------------------------------------------------------------------------------------------------------------------------------------------------------|
|                                                                                                                                                                                |                         |              |              |                                                                                              | Type (d-f)  | Conc. a.s. (i) | method kind (f-h)                                                     | range of growth stages & season (j) | number min-max (k) | Interval between application (min) | kg a.s./hL min-max (l)         | Water L/ha min-max | kg a.s./ha min-max (l) |                |                                                                                                                                                                                                                                                                                                                                                                                                                                                                                   |
| Vegetables (Root vegetable plants (NNNVW) & tuberous plants (NNNZK), bulb plants (NNNZJ), fruit-vegetable plants (NNNVF), Legume vegetables (3LEVC), Leafy vegetables (3LEAC)) | EU                      | MON 52276    | F            | Emerged annual weeds (3ANMNT, 3ANDIT), emerged perennial and biennial weeds (3PEDIT, 3PEMNT) | SL          | 360 g/L        | Inter-row application: ground directed, fully-shielded (hooded) spray | Crop BBCH < 20                      | 1                  | NA                                 | 0.27 - 1.08                    | 100-400            | 1.08                   | 60             | <p><b>Use No. 6a</b></p> <p>Avoid crop contamination during treatment.</p> <p>Maximum application rate of 1.08 kg as/ha glyphosate in any 12 months period.</p> <p>Use at least 75% drift reducing nozzles.</p> <p>Applications are made between the crop rows. The rate refers to the treated area only, which represents not more than 50 % of the total area. The application rate with reference to the total surface area is not more than 50 % of the stated dose rate.</p> |
| Vegetables (Root vegetable plants (NNNVW) & tuberous plants (NNNZK), bulb plants (NNNZJ), fruit-vegetable plants (NNNVF), Legume vegetables (3LEVC), Leafy vegetables (3LEAC)) | EU                      | MON 52276    | F            | Emerged annual weeds (3ANMNT, 3ANDIT)                                                        | SL          | 360 g/L        | Inter-row application: ground directed, fully-shielded (hooded) spray | Crop BBCH < 20                      | 1                  | NA                                 | 0.18 - 0.72                    | 100-400            | 0.72                   | 60             | <p><b>Use No. 6b</b></p> <p>Avoid crop contamination during treatment.</p> <p>Maximum application rate of 0.72 kg as/ha glyphosate in any 12 months period.</p> <p>Use at least 75% drift reducing nozzles.</p> <p>Applications are between the crop rows. The rate refers to the treated area only, which represents not more than 50 % of the total area. The application rate with reference to the total surface area is not more than 50 % of the stated dose rate.</p>      |

| Crop and/or situation (a)                                                   | Member State or Country | Product name | F G or I (b) | Pests or Group of pests controlled (c)                                                       | Preparation |                | Application                                            |                                                               |                    |                                    | Application rate per treatment |                    |                        | PHI (days) (m) | Remarks                                                                                                                                                                                                                                                                                                                                                                            |
|-----------------------------------------------------------------------------|-------------------------|--------------|--------------|----------------------------------------------------------------------------------------------|-------------|----------------|--------------------------------------------------------|---------------------------------------------------------------|--------------------|------------------------------------|--------------------------------|--------------------|------------------------|----------------|------------------------------------------------------------------------------------------------------------------------------------------------------------------------------------------------------------------------------------------------------------------------------------------------------------------------------------------------------------------------------------|
|                                                                             |                         |              |              |                                                                                              | Type (d-f)  | Conc. a.s. (i) | method kind (f-h)                                      | range of growth stages & season (j)                           | number min-max (k) | Interval between application (min) | kg a.s./hL min-max (l)         | Water L/ha min-max | kg a.s./ha min-max (l) |                |                                                                                                                                                                                                                                                                                                                                                                                    |
| Railway tracks (3RAILO)                                                     | EU                      | MON 52276    | F            | Emerged annual weeds (3ANMNT, 3ANDIT), emerged perennial and biennial weeds (3PEDIT, 3PEMNT) | SL          | 360 g/L        | Ground directed, spray                                 | Post-emergence of weeds throughout the year / no crop present | 2                  | 90 days                            | 0.45 - 1.8                     | 100-400            | 1.8                    | N/A            | <p><b>Use No. 7a</b></p> <p>Application by spray train</p> <p>Drift reducing nozzles should be used or curtailment measures of the potential for drift should be used – e.g., shielded spray, incorporating targeted / direct application with at least 75% potential for drift reduction.</p> <p>Maximum application rate of 3.6 kg as/ha glyphosate in any 12 months period.</p> |
| Railway tracks (3RAILO)                                                     | EU                      | MON 52276    | F            | Emerged annual weeds (3ANMNT, 3ANDIT), emerged perennial and biennial weeds (3PEDIT, 3PEMNT) | SL          | 360 g/L        | Ground directed, spray                                 | Post-emergence of weeds throughout the year / no crop present | 1                  | NA                                 | 0.45 - 1.8                     | 100-400            | 1.8                    | N/A            | <p><b>Use No. 7b</b></p> <p>Application by spray train</p> <p>Drift reducing nozzles should be used or curtailment measures of the potential for drift should be used – e.g., shielded spray, incorporating targeted / direct application with at least 75% potential for drift reduction.</p> <p>Maximum application rate of 1.8 kg as/ha glyphosate in any 12 months period.</p> |
| Invasive species in agricultural (3CRGK) and non-agricultural (YNKXX) areas | EU                      | MON 52276    | F            | Giant hogweed ( <i>Hera-cleum mantegazzi anum</i> ) (HERMZ)                                  | SL          | 360 g/L        | Spot treatment (shielded)                              | Post-emergence of invasive species throughout the year        | 1                  | NA                                 | 0.45 - 36                      | 5-400              | 1.8                    | N/A            | <p><b>Use No. 8</b></p> <p>Maximum application rate of 1.8 kg as/ha glyphosate in any 12 months period.</p> <p>Use at least 75% drift reducing nozzles.</p>                                                                                                                                                                                                                        |
| Invasive species in agricultural (3CRGK) and non-agricultural (YNKXX) areas | EU                      | MON 52276    | F            | Japanese knotweed ( <i>Rey-noutria japonica</i> ) (POLCU)                                    | SL          | 360 g/L        | Spot treatment (shielded), cut stem: spray application | Late summer, early fall                                       | 1                  | NA                                 | 0.45 - 36                      | 5-400              | 1.8                    | N/A            | <p><b>Use No. 9</b></p> <p>Maximum application rate of 1.8 kg as/ha glyphosate in any 12 months period.</p> <p>Use at least 75% drift reducing nozzles.</p>                                                                                                                                                                                                                        |

| Crop and/or situation (a)                                                                                                                                                                  | Member State or Country | Product name | F G or I (b) | Pests or Group of pests controlled (c)       | Preparation |                | Application               |                                        |                    |                                    | Application rate per treatment |                    |                        | PHI (days) (m) | Remarks                                                                                                                                                                                                                                                                                                                     |
|--------------------------------------------------------------------------------------------------------------------------------------------------------------------------------------------|-------------------------|--------------|--------------|----------------------------------------------|-------------|----------------|---------------------------|----------------------------------------|--------------------|------------------------------------|--------------------------------|--------------------|------------------------|----------------|-----------------------------------------------------------------------------------------------------------------------------------------------------------------------------------------------------------------------------------------------------------------------------------------------------------------------------|
|                                                                                                                                                                                            |                         |              |              |                                              | Type (d-f)  | Conc. a.s. (i) | method kind (f-h)         | range of growth stages & season (j)    | number min-max (k) | Interval between application (min) | kg a.s./hL min-max (l)         | Water L/ha min-max | kg a.s./ha min-max (l) |                |                                                                                                                                                                                                                                                                                                                             |
| Root vegetable plants (NNNVW) & tuberous plants (NNNZK), bulb plants (NNNZJ), fruit-vegetable plants (NNNVF), Brassica (1BRSG), leaf and stem vegetable plants (NNNVL), Sugar beet (BEAVA) | EU                      | MON 52276    | F            | Couch grass ( <i>Elymus repens</i> ) (AGRRE) | SL          | 360 g/L        | Spot treatment (shielded) | Post-harvest, pre-sowing, pre-planting | 1                  | NA                                 | 0.27 - 1.08                    | 100-400            | 1.08                   | N/A            | <p><b>Use No. 10a</b></p> <p>Application to existing row cropland after harvest for removal of couch grass.</p> <p>Maximum application rate of 1.08 kg as/ha glyphosate in any 12 months period.</p> <p>Use at least 75% drift reducing nozzles.</p> <p>The treated area represents not more than 20 % of the cropland.</p> |

| Crop and/or situation (a)                                                                                                                                                                  | Member State or Country | Product name | F G or I (b) | Pests or Group of pests controlled (c)       | Preparation |                | Application               |                                        |                    |                                    | Application rate per treatment |                    |                        | PHI (days) (m) | Remarks                                                                                                                                                                                                                                                                                                                                           |
|--------------------------------------------------------------------------------------------------------------------------------------------------------------------------------------------|-------------------------|--------------|--------------|----------------------------------------------|-------------|----------------|---------------------------|----------------------------------------|--------------------|------------------------------------|--------------------------------|--------------------|------------------------|----------------|---------------------------------------------------------------------------------------------------------------------------------------------------------------------------------------------------------------------------------------------------------------------------------------------------------------------------------------------------|
|                                                                                                                                                                                            |                         |              |              |                                              | Type (d-f)  | Conc. a.s. (i) | method kind (f-h)         | range of growth stages & season (j)    | number min-max (k) | Interval between application (min) | kg a.s./hL min-max (l)         | Water L/ha min-max | kg a.s./ha min-max (l) |                |                                                                                                                                                                                                                                                                                                                                                   |
| Root vegetable plants (NNNVW) & tuberous plants (NNNZK), bulb plants (NNNZJ), fruit-vegetable plants (NNNVF), Brassica (1BRSG), leaf and stem vegetable plants (NNNVL), Sugar beet (BEAVA) | EU                      | MON 52276    | F            | Couch grass ( <i>Elymus repens</i> ) (AGRRE) | SL          | 360 g/L        | Spot treatment (shielded) | Post-harvest, pre-sowing, pre-planting | 1                  | NA                                 | 0.18 - 0.72                    | 100-400            | 0.72                   | N/A            | <p><b>Use No. 10b</b></p> <p>Application to existing row cropland after harvest for removal of couch grass.</p> <p>Maximum application rate of 0.72 kg as/ha glyphosate in any 12 months period.</p> <p>Use at least 75% drift reducing nozzles.</p> <p>The treated area represents not more than 20 % of the cropland.</p>                       |
| Root vegetable plants (NNNVW) & tuberous plants (NNNZK), bulb plants (NNNZJ), fruit-vegetable plants (NNNVF), Brassica (1BRSG), leaf and stem vegetable plants (NNNVL), Sugar beet (BEAVA) | EU                      | MON 52276    | F            | Couch grass ( <i>Elymus repens</i> ) (AGRRE) | SL          | 360 g/L        | Spot treatment (shielded) | Post-harvest, pre-sowing, pre-planting | 1                  | NA                                 | 0.18 - 0.72                    | 100-400            | 0.72                   | N/A            | <p><b>Use No. 10c</b></p> <p>Application to existing row cropland after harvest for removal of couch grass once every three years.</p> <p>Maximum application rate of 0.72 kg as/ha glyphosate in any 36 months period.</p> <p>Use at least 75% drift reducing nozzles</p> <p>The treated area represents not more than 20 % of the cropland.</p> |

Risk mitigation measures that have been indicated in the remarks column in the table are those defined by the applicant in their application for renewal (as set out in document D1 of the dossier provided with the application).



During the peer review, upon request, the applicant proposed the following additional mitigation measure aimed at reducing losses in biodiversity from the uses: 1a, 1b, 1c, 2a, 2b, 2c, 3a, 3b, 6a & 6b.

Risk managers in individual Member States should decide what additional measures are required to compensate for indirect effects to biodiversity. The type and extent of compensatory measure is dependent on the ecological and agricultural conditions in the Member State and the size of the cropped area. A recommended compensatory measure is to have a multifunctional field margin (MFFM) on farms when glyphosate is applied to 100% of the inter-crop area for fields  $\geq 15$  ha. MFFMs (e.g., hedgerow, flowering strip) should be established on marginal farmland along field boundaries of arable fields, and is protected from spray drift, to provide habitat for biodiversity and wildlife corridors’.

It should be noted that the adequacy of the size limitation of the field ( $>15$  ha) and threshold for 100% of the treated area was not scientifically supported by the assessments available (see Section 5 of the EFSA Conclusion).

|                                                                                                                                                                                                                                                                                                                                                                                                                                                                                                                                                                                                                                                                                                                                                                                                                                                                                                                              |                                                                                                                                                                                                                                                                                                                                                                                                                                                                                                                                                                                                                                                                                                                                                                                                                                                                                                                                                                                                         |
|------------------------------------------------------------------------------------------------------------------------------------------------------------------------------------------------------------------------------------------------------------------------------------------------------------------------------------------------------------------------------------------------------------------------------------------------------------------------------------------------------------------------------------------------------------------------------------------------------------------------------------------------------------------------------------------------------------------------------------------------------------------------------------------------------------------------------------------------------------------------------------------------------------------------------|---------------------------------------------------------------------------------------------------------------------------------------------------------------------------------------------------------------------------------------------------------------------------------------------------------------------------------------------------------------------------------------------------------------------------------------------------------------------------------------------------------------------------------------------------------------------------------------------------------------------------------------------------------------------------------------------------------------------------------------------------------------------------------------------------------------------------------------------------------------------------------------------------------------------------------------------------------------------------------------------------------|
| <ul style="list-style-type: none"> <li>(a) For crops, the EU and Codex classifications (both) should be taken into account; where relevant, the use situation should be described (e.g. fumigation of a structure)</li> <li>(b) Outdoor or field use (F), greenhouse application (G) or indoor application (I)</li> <li>(c) e.g. biting and sucking insects, soil born insects, foliar fungi, weeds</li> <li>(d) e.g. wettable powder (WP), emulsifiable concentrate (EC), granule (GR)</li> <li>(e) CropLife International Technical Monograph no 2, 6th Edition. Revised May 2008. Catalogue of pesticide</li> <li>(f) All abbreviations used must be explained</li> <li>(g) Method, e.g. high volume spraying, low volume spraying, spreading, dusting, drench</li> <li>(h) Kind, e.g. overall, broadcast, aerial spraying, row, individual plant, between the plant- type of equipment used must be indicated</li> </ul> | <ul style="list-style-type: none"> <li>(i) g/kg or g/L. Normally the rate should be given for the active substance (according to ISO) and not for the variant in order to compare the rate for same active substances used in different variants (e.g. fluoroxypyr). <b>In certain cases, where only one variant is synthesised, it is more appropriate to give the rate for the variant (e.g. benthialdicarb-isopropyl).</b></li> <li>(j) Growth stage range from first to last treatment (BBCH Monograph, Growth Stages of Plants, 1997, Blackwell, ISBN 3-8263-3152-4), including where relevant, information on season at time of application</li> <li>(k) Indicate the minimum and maximum number of applications possible under practical conditions of use</li> <li>(l) The values should be given in g or kg whatever gives the more manageable number (e.g. 200 kg/ha instead of 200 000 g/ha or 12.5 g/ha instead of 0.0125 kg/ha)</li> <li>(m) PHI - minimum pre-harvest interval</li> </ul> |
|------------------------------------------------------------------------------------------------------------------------------------------------------------------------------------------------------------------------------------------------------------------------------------------------------------------------------------------------------------------------------------------------------------------------------------------------------------------------------------------------------------------------------------------------------------------------------------------------------------------------------------------------------------------------------------------------------------------------------------------------------------------------------------------------------------------------------------------------------------------------------------------------------------------------------|---------------------------------------------------------------------------------------------------------------------------------------------------------------------------------------------------------------------------------------------------------------------------------------------------------------------------------------------------------------------------------------------------------------------------------------------------------------------------------------------------------------------------------------------------------------------------------------------------------------------------------------------------------------------------------------------------------------------------------------------------------------------------------------------------------------------------------------------------------------------------------------------------------------------------------------------------------------------------------------------------------|

**Summary of additional intended uses for which MRL applications have been made, that in addition to the uses above, have also been considered in the consumer risk assessment**

**Regulation (EC) N° 1107/2009 Article 8.1(g)**

Not applicable. Only a MRL for honey is applied for. This is not regarded an additional intended use.

**Further information, Efficacy**

**Effectiveness (Regulation (EU) N° 284/2013, Annex Part A, point 6.2)**

In terms of efficacy, the representative uses GAPs are supported.

**Adverse effects on field crops (Regulation (EU) N° 284/2013, Annex Part A, point 6.4)**

In terms of adverse effects on field crops, the representative uses GAPs are supported.

**Observations on other undesirable or unintended side-effects (Regulation (EU) N° 284/2013, Annex Part A, point 6.5)**

In terms of adverse effects on succeeding or adjacent crops, the representative uses GAPs are supported.

**Groundwater metabolites: Screening for biological activity (SANCO/221/2000-rev.10-final Step 3 a Stage 1)**

Activity against target organism

|      |
|------|
| AMPA |
| No   |

## Methods of Analysis

### Analytical methods for the active substance (Regulation (EU) N° 283/2013, Annex Part A, point 4.1 and Regulation (EU) N° 284/2013, Annex Part A, point 5.2)

|                                                     |                                                         |
|-----------------------------------------------------|---------------------------------------------------------|
| Technical a.s. (analytical technique)               | HPLC-UV; HPLC-PDA                                       |
| Impurities in technical a.s. (analytical technique) | HPLC-UV; LC-MS/MS; IC-UV; HPLC-colorimeter; Karl-Fisher |
| Plant protection product (analytical technique)     | HPLC-UV                                                 |

### Analytical methods for residues (Regulation (EU) N° 283/2013, Annex Part A, point 4.2 & point 7.4.2)

#### Residue definitions for monitoring purposes

|                       |                                                                                                                                                                                                                                                                                                                                                                                                                                                                                                                                                                                                                                                                                                                                                                                                                                                                                                                                                                                                              |
|-----------------------|--------------------------------------------------------------------------------------------------------------------------------------------------------------------------------------------------------------------------------------------------------------------------------------------------------------------------------------------------------------------------------------------------------------------------------------------------------------------------------------------------------------------------------------------------------------------------------------------------------------------------------------------------------------------------------------------------------------------------------------------------------------------------------------------------------------------------------------------------------------------------------------------------------------------------------------------------------------------------------------------------------------|
| Food of plant origin  | <p><b>Option 1 - According to Codex (FAO-WHO, 2019)<sup>1</sup>:</b></p> <ol style="list-style-type: none"> <li>1) For soya bean, oilseed rape (OSR), maize (including sweet corn)<sup>2</sup>: Sum of glyphosate and <i>N</i>-acetyl glyphosate, expressed as glyphosate</li> <li>2) All other crops: Glyphosate only</li> </ol> <p><b>Option 2- According to the proposal in the EFSA MRL Art.12 Reasoned Opinion of 2019<sup>3</sup>,</b> including also the metabolite AMPA for some crops:</p> <ol style="list-style-type: none"> <li>1) For soya bean, OSR, cotton, maize (including sweet corn), sugar beet<sup>4</sup>: Sum of glyphosate, AMPA and <i>N</i>-acetyl glyphosate, expressed as glyphosate</li> <li>2) All other crops: Glyphosate only</li> </ol> <p>The inclusion of AMPA in the residue definition for plants may need to be further considered once the information on additional field residue trials and on the magnitude of residues in rotational crops has been completed.</p> |
| Food of animal origin | Sum of glyphosate and <i>N</i> -acetyl glyphosate, expressed as glyphosate, except for bee products where it is open if AMPA might be added, pending rotational crop considerations or if option 2 is selected for the plant residue definition                                                                                                                                                                                                                                                                                                                                                                                                                                                                                                                                                                                                                                                                                                                                                              |
| Soil                  | glyphosate and AMPA                                                                                                                                                                                                                                                                                                                                                                                                                                                                                                                                                                                                                                                                                                                                                                                                                                                                                                                                                                                          |
| Sediment              | glyphosate and AMPA                                                                                                                                                                                                                                                                                                                                                                                                                                                                                                                                                                                                                                                                                                                                                                                                                                                                                                                                                                                          |

<sup>1</sup> FAO and WHO. 2019. *Pesticide residues in food 2019 – Extra Joint FAO/WHO Meeting on Pesticide Residues Evaluation Part I: Residues*. Rome. <https://www.fao.org/publications/card/en/c/CA6010EN/>

<sup>2</sup> Due to the potential presence of glyphosate tolerant sources in the market (eg. imported products) risk managers should consider applying the proposed residue definition to all the monitored samples from these crops.

<sup>3</sup> EFSA (European Food Safety Authority), 2019. Review of the existing maximum residue levels for glyphosate according to Article 12 of Regulation (EC) No 396/2005 – revised version to take into account omitted data. EFSA Journal 2019;17(10):5862 doi:10.2903/j.efsa.2019.5862

<sup>4</sup> Due to the potential presence of glyphosate tolerant sources in the market (eg. imported products) risk managers should consider to apply the proposed residue definition to all the monitored samples from these crops.

|                         |                 |                                         |
|-------------------------|-----------------|-----------------------------------------|
| Water                   | surface         | glyphosate and AMPA                     |
|                         | drinking/ground | glyphosate and AMPA                     |
| Air                     |                 | Glyphosate                              |
| Body fluids and tissues |                 | Fluids and tissues: glyphosate and AMPA |

### Monitoring/Enforcement methods

|                                                                                               |                                                                                                                                                       |
|-----------------------------------------------------------------------------------------------|-------------------------------------------------------------------------------------------------------------------------------------------------------|
| Food/feed of plant origin (analytical technique and LOQ for methods for monitoring purposes)  | LC-MS/MS<br>LOQ 0.025 mg/kg for glyphosate, AMPA and <i>N</i> -acetyl glyphosate                                                                      |
| Food/feed of animal origin (analytical technique and LOQ for methods for monitoring purposes) | LC-MS/MS<br>LOQ 0.025 mg/kg for glyphosate, AMPA and <i>N</i> -acetyl glyphosate                                                                      |
| Honey (analytical technique and LOQ for methods for monitoring purposes)                      | LC-MS/MS<br>LOQ 0.025 mg/kg for glyphosate and AMPA<br>Data gap: for <i>N</i> -acetyl glyphosate residues                                             |
| Soil (analytical technique and LOQ)                                                           | LC-MS/MS<br>LOQ 0.05 mg/kg for glyphosate and AMPA                                                                                                    |
| Water (analytical technique and LOQ)                                                          | LC-MS/MS<br>LOQ 0.03 µg/L for glyphosate and AMPA                                                                                                     |
| Air (analytical technique and LOQ)                                                            | GC-MS<br>LOQ 5 µg/m <sup>3</sup> for glyphosate                                                                                                       |
| Body fluids and tissues (analytical technique and LOQ)                                        | Fluids: LC-MS/MS<br>LOQ 0.01 mg/L for glyphosate and AMPA<br>Tissues: LC-MS/MS<br>LOQ 0.025 mg/kg for glyphosate AMPA and <i>N</i> -acetyl glyphosate |

### Classification and labelling with regard to physical and chemical data (Regulation (EU) N° 283/2013, Annex Part A, point 10)

|                                                                                                                                                                                                |                                                                            |
|------------------------------------------------------------------------------------------------------------------------------------------------------------------------------------------------|----------------------------------------------------------------------------|
| Substance                                                                                                                                                                                      | Glyphosate                                                                 |
| Harmonised classification according to Regulation (EC) No 1272/2008 and its Adaptations to Technical Process [Table 3.1 of Annex VI of Regulation (EC) No 1272/2008 as amended] <sup>5</sup> : | No classification linked to physical and chemical properties of glyphosate |

<sup>5</sup> Regulation (EC) No 1272/2008 of the European Parliament and of the Council of 16 December 2008 on classification, labelling and packaging of substances and mixtures, amending and repealing Directives 67/548/EEC and 1999/45/EC, and amending Regulation (EC) No 1907/2006. OJ L 353, 31.12.2008, 1-1355.

According to the peer review, criteria for harmonised classification according to Regulation (EC) No 1272/2008 may be met for:

None

## Impact on Human and Animal Health

### Absorption, distribution, metabolism and excretion (toxicokinetics) (Regulation (EU) N° 283/2013, Annex Part A, point 5.1)

|                                                             |                                                                                                                                                                                                                                                                                                                                                                                                                                                                                                                                                                                                                                                                                                                                                                                                                               |
|-------------------------------------------------------------|-------------------------------------------------------------------------------------------------------------------------------------------------------------------------------------------------------------------------------------------------------------------------------------------------------------------------------------------------------------------------------------------------------------------------------------------------------------------------------------------------------------------------------------------------------------------------------------------------------------------------------------------------------------------------------------------------------------------------------------------------------------------------------------------------------------------------------|
| Rate and extent of oral absorption/systemic bioavailability | 20% (based on urinary excretion and cage wash) (based on various studies in rats, single lower dose levels ranging between 1-10 mg/kg bw)<br>Absorption independent of dose and sex.                                                                                                                                                                                                                                                                                                                                                                                                                                                                                                                                                                                                                                          |
| Toxicokinetics                                              | <p><u>Glyphosate:</u><br/>Cmax in plasma: 0.64-0.84 µg/ml at 72 mg/kg bw per day and 4.69-5.31 µg/ml at 385 mg/kg bw per day after 14-day repeated dietary administration.<br/>Tmax: 0.5 hour at 72 and 385 mg/kg bw per day after 14-day repeated dietary administration; other studies 2-8 hours<br/>Plasma T1/2: 11 hours at 72 mg/kg bw per day and 13 hours at 385 mg/kg bw per day after 14-day repeated dietary administration; other studies 6-12 h<br/>AUC: 8.3-10.4 µg/ml at 72 mg/kg bw per day and 44.7-57.0 µg/ml at 385 mg/kg bw per day after 14-day repeated dietary administration</p> <p><u>AMPA (after 14-day repeated dietary administration of 385 mg/kg bw/d of glyphosate):</u><br/>Cmax in plasma: 0.038-0.041 µg/ml<br/>Tmax: 0.5 hour<br/>Plasma T1/2: 7.0-7.5 hours<br/>AUC: 0.245-0.276 µg/ml</p> |
| Distribution                                                | Widely distributed (bone, kidney, to lesser extent in liver)                                                                                                                                                                                                                                                                                                                                                                                                                                                                                                                                                                                                                                                                                                                                                                  |
| Potential for bioaccumulation                               | No evidence for accumulation in mammals                                                                                                                                                                                                                                                                                                                                                                                                                                                                                                                                                                                                                                                                                                                                                                                       |
| Rate and extent of excretion                                | Rapid and extensive (app. 90 % within 48 h), mainly via faeces (~ 20% in urine). Biliary excretion and exhalation negligible.                                                                                                                                                                                                                                                                                                                                                                                                                                                                                                                                                                                                                                                                                                 |
| Metabolism in animals                                       | Very limited metabolism with only biotransformation to AMPA accounting for up to 0.6% of the total excreted amount.                                                                                                                                                                                                                                                                                                                                                                                                                                                                                                                                                                                                                                                                                                           |
| <i>In vitro</i> metabolism                                  | Poorly metabolized (97% unmetabolized glyphosate). No unique human metabolite detected.                                                                                                                                                                                                                                                                                                                                                                                                                                                                                                                                                                                                                                                                                                                                       |
| Toxicologically relevant compounds (animals and plants)     | Glyphosate, AMPA (M02), <i>N</i> -acetyl AMPA (M05), <i>N</i> -acetyl glyphosate (M04)                                                                                                                                                                                                                                                                                                                                                                                                                                                                                                                                                                                                                                                                                                                                        |
| Toxicologically relevant compounds (environment)            | Glyphosate                                                                                                                                                                                                                                                                                                                                                                                                                                                                                                                                                                                                                                                                                                                                                                                                                    |

**Acute toxicity (Regulation (EU) N° 283/2013, Annex Part A, point 5.2)**

|                                 |                                                                                                       |              |
|---------------------------------|-------------------------------------------------------------------------------------------------------|--------------|
| Rat LD <sub>50</sub> oral       | > 2000 mg/kg bw                                                                                       |              |
| Rat LD <sub>50</sub> dermal     | > 2000 mg/kg bw                                                                                       |              |
| Rat LC <sub>50</sub> inhalation | > 5 mg/L air/4h (nose-only)                                                                           |              |
| Skin irritation                 | Non-irritating to skin                                                                                |              |
| Eye irritation                  | Serious eye damage                                                                                    | Cat. 1, H318 |
| Skin sensitisation              | Negative (M&K test, LLNA, Buehler) (glyphosate)<br>Negative (M&K test) (glyphosate-isopropylammonium) |              |
| Phototoxicity                   | Not required                                                                                          |              |

**Short-term toxicity (Regulation (EU) N° 283/2013, Annex Part A, point 5.3)**

|                                |                                                                                                                                                                                                                                                                                                                                                                                                                                                                                                                                                                                                                                                    |  |
|--------------------------------|----------------------------------------------------------------------------------------------------------------------------------------------------------------------------------------------------------------------------------------------------------------------------------------------------------------------------------------------------------------------------------------------------------------------------------------------------------------------------------------------------------------------------------------------------------------------------------------------------------------------------------------------------|--|
| Target organ / critical effect | Rat: soft stool, diarrhoea, reduction in body weight gain and food consumption, liver effects (increased weight, changes in blood chemistry), caecum (distention and increased weight), salivary gland (cellular alterations; local effect)<br>Mice: reduction in body weight gain and food consumption, liver effects (changes in blood chemistry), caecum (distension), increased incidence of cystitis in the urinary bladder (high dose males only), salivary gland (cellular alterations-local effect)<br>Dog: loose stool, reduction in body weight gain and food consumption, liver (changes in blood chemistry), kidney (increased weight) |  |
| Relevant oral NOAEL            | 90-day, rat: 79 mg/kg bw per day<br>90-day, mice: 1221 mg/kg bw per day<br>90-day, dog: 53 mg/kg bw per day                                                                                                                                                                                                                                                                                                                                                                                                                                                                                                                                        |  |
| Relevant dermal NOAEL          | 21-day, rat: 1000 mg/kg bw per day (systemic); LOAEL for local effects of 1000 mg/kg bw per day (mild skin irritation; observed at the only dose tested)<br>28-day, rabbit: 2000 mg/kg bw per day (systemic); 1000 mg/kg bw per day (local effects)                                                                                                                                                                                                                                                                                                                                                                                                |  |
| Relevant inhalation NOAEL      | No data - not required                                                                                                                                                                                                                                                                                                                                                                                                                                                                                                                                                                                                                             |  |



**Genotoxicity (Regulation (EU) N° 283/2013, Annex Part A, point 5.4)**

|                                   |                                                                                                                                                                                                                                                                                                                                                                                                                                                                                                                                                                                                                                                                              |
|-----------------------------------|------------------------------------------------------------------------------------------------------------------------------------------------------------------------------------------------------------------------------------------------------------------------------------------------------------------------------------------------------------------------------------------------------------------------------------------------------------------------------------------------------------------------------------------------------------------------------------------------------------------------------------------------------------------------------|
| <p><i>In vitro</i> studies</p>    | <p><b><i>In vitro</i> gene mutation assay in bacteria and in mammalian cells</b><br/> All <i>in vitro</i> assays showed consistently negative results (independently of their reliability and relevance)</p> <p><b><i>In vitro</i> clastogenicity and aneugenicity assays</b><br/> <i>In vitro</i> assays of lower reliability and/or lower relevance showed mixed results. This is not the case for acceptable <i>in vitro</i> assays of high reliability and relevance that showed consistently negative results.</p> <p><b><i>In vitro</i> DNA damage studies:</b><br/> <i>In vitro</i> studies showed inconsistent results.</p>                                          |
| <p><i>In vivo</i> studies</p>     | <p><b><i>In vivo</i> clastogenicity and aneugenicity studies</b><br/> <i>In vivo</i> studies of lower reliability and/or lower relevance showed mixed results. This is not the case for acceptable <i>in vivo studies</i> of high reliability and relevance that showed consistently negative results.</p> <p><b><i>In vivo</i> DNA damage studies:</b><br/> There are no acceptable <i>in vivo</i> studies, there is only 1 <i>in vivo</i> study, supplementary, showing positive results.</p> <p><b>Epidemiological studies on genotoxicity</b><br/> Studies available considered supplementary and of low weight for the overall weight of evidence for genotoxicity.</p> |
| <p>Photomutagenicity</p>          | <p>Not required</p>                                                                                                                                                                                                                                                                                                                                                                                                                                                                                                                                                                                                                                                          |
| <p>Potential for genotoxicity</p> | <p>Glyphosate is unlikely to be genotoxic based on a weight of evidence approach.</p>                                                                                                                                                                                                                                                                                                                                                                                                                                                                                                                                                                                        |

**Long-term toxicity and carcinogenicity (Regulation (EU) N°283/2013, Annex Part A, point 5.5)**

|                                                  |                                                                                                                                                                                                                                                                                                                                                                                                                                                                                                                         |  |
|--------------------------------------------------|-------------------------------------------------------------------------------------------------------------------------------------------------------------------------------------------------------------------------------------------------------------------------------------------------------------------------------------------------------------------------------------------------------------------------------------------------------------------------------------------------------------------------|--|
| Long-term effects (target organ/critical effect) | <p>Rat: liver (increased ALP and liver lesions), stomach (inflammation and hyperplasia of squamous mucosa), caecum (distention and increased weight), eye (cataracts), lung lesions; <u>local effects</u> on salivary glands (increased weight and cellular alterations)</p> <p>Mouse: Reduced body weight gain, urinary bladder (hyperplasia). Higher dose levels produced liver (hepatocyte hypertrophy and necrosis) and kidney (chronic interstitial nephritis) lesions, stomach cysts and increased mortality.</p> |  |
| Relevant long-term NOAEL                         | <p>2-year, rat: 59.4 mg/kg bw per day</p> <p>18-month, mouse: 149.7 mg/kg bw per day (overall NOAEL)</p>                                                                                                                                                                                                                                                                                                                                                                                                                |  |
| Carcinogenicity (target organ, tumour type)      | <p>Unlikely to be carcinogenic in rats and mice.</p> <p><b>Epidemiological studies on carcinogenicity:</b><br/>The currently available human epidemiological studies do not provide conclusive evidence that glyphosate exposure is associated with any cancer-related health effect.</p>                                                                                                                                                                                                                               |  |
| Relevant NOAEL for carcinogenicity               | <p>2-year, rat: 1214 mg/kg bw per day (highest dose tested)</p> <p>18/24-month, mouse: 988 mg/kg bw per day</p>                                                                                                                                                                                                                                                                                                                                                                                                         |  |

**Reproductive toxicity (Regulation (EU) N° 283/2013, Annex Part A, point 5.6)**

**Reproduction toxicity**

Reproduction target / critical effect

|                                                                                                                                                                                                                                                                                                                                                                                                                                                                                                                                                                                                                                                                                                                                                                                                                                                                                   |  |
|-----------------------------------------------------------------------------------------------------------------------------------------------------------------------------------------------------------------------------------------------------------------------------------------------------------------------------------------------------------------------------------------------------------------------------------------------------------------------------------------------------------------------------------------------------------------------------------------------------------------------------------------------------------------------------------------------------------------------------------------------------------------------------------------------------------------------------------------------------------------------------------|--|
| <p><u>Rats</u></p> <p><u>Adult:</u> gastrointestinal disturbances (soft stool, distension of caecum), reduced bw, organ weight changes (increased liver and kidney weights), effects on salivary gland (histopathological changes). Effects on salivary glands were considered as a local effect.</p> <p><u>Reproduction and fertility:</u> reduced homogenisation resistant spermatids (in <i>Cauda epididymidis</i>) in F0 males at limit dose (1063 mg/kg bw per day) but no evidence for impairment of fertility and reproductive performance, lower fertility indices in F1 females at high dose level (above 2000 mg/kg bw per day) (one study)</p> <p><u>Offspring:</u> reduced bw, delayed preputial separation in F1 generation at limit dose (1063 mg/kg bw per day) (one study), distension of caecum at high dose level (above 2000 mg/kg bw per day) (one study)</p> |  |
|-----------------------------------------------------------------------------------------------------------------------------------------------------------------------------------------------------------------------------------------------------------------------------------------------------------------------------------------------------------------------------------------------------------------------------------------------------------------------------------------------------------------------------------------------------------------------------------------------------------------------------------------------------------------------------------------------------------------------------------------------------------------------------------------------------------------------------------------------------------------------------------|--|

|                                                                             |                                                                                                                                                                                                                                                                                                                                                                                                                             |  |
|-----------------------------------------------------------------------------|-----------------------------------------------------------------------------------------------------------------------------------------------------------------------------------------------------------------------------------------------------------------------------------------------------------------------------------------------------------------------------------------------------------------------------|--|
|                                                                             | <p><b>Epidemiological studies on reproductive toxicity:</b><br/>Overall inconclusive for a causal or clear associative relationship between glyphosate and effects on reproductive endpoints</p>                                                                                                                                                                                                                            |  |
| Relevant parental NOAEL                                                     | NOAEL: 417 mg/kg bw per day                                                                                                                                                                                                                                                                                                                                                                                                 |  |
| Relevant reproductive NOAEL                                                 | 351 mg/kg bw per day                                                                                                                                                                                                                                                                                                                                                                                                        |  |
| Relevant offspring NOAEL                                                    | 293 mg/kg bw per day                                                                                                                                                                                                                                                                                                                                                                                                        |  |
| <b>Developmental toxicity</b>                                               |                                                                                                                                                                                                                                                                                                                                                                                                                             |  |
| Developmental target / critical effect                                      | <p>Rat:<br/>Maternal toxicity: clinical signs in both studies<br/>Developmental toxicity: skeletal variations and reduced ossification at 1000 mg/kg bw per day<br/>Rabbit:<br/>Maternal toxicity: reduced body weight gain (21%, not stat sign); (between gestation days 11 to 29)<br/>Developmental toxicity:<br/>increased post-implantation loss (21% compared to 5.7% in controls) and reduced foetal weight (-8%)</p> |  |
| Relevant maternal NOAEL                                                     | <p>Rat: 300 mg/kg bw per day<br/>Rabbit: 50 mg/kg bw per day</p>                                                                                                                                                                                                                                                                                                                                                            |  |
| Relevant developmental NOAEL                                                | <p>Rat: 300 mg/kg bw per day<br/>Rabbit: 150 mg/kg bw per day</p>                                                                                                                                                                                                                                                                                                                                                           |  |
| <b>Neurotoxicity (Regulation (EU) N° 283/2013, Annex Part A, point 5.7)</b> |                                                                                                                                                                                                                                                                                                                                                                                                                             |  |
| Acute neurotoxicity                                                         | <p>No sign of neurotoxicity<br/>Critical effect: mortality, clinical signs<br/><br/>NOAEL systemic toxicity = 1000 mg/kg bw<br/>NOAEL neurotoxicity = 2000 mg/kg bw (highest dose tested)</p>                                                                                                                                                                                                                               |  |
| Repeated neurotoxicity                                                      | <p>No sign of neurotoxicity<br/>Critical effect: reduced body weight and food consumption<br/><br/>NOAEL systemic toxicity = 395 mg/kg bw per day<br/>NOAEL neurotoxicity = 1499 mg/kg bw per day (highest dose tested)</p>                                                                                                                                                                                                 |  |

Additional studies (e.g. delayed neurotoxicity, developmental neurotoxicity)

|  |                                                                                                                                                                                                                                                                                                                                                                                                                                                                                                                                                            |
|--|------------------------------------------------------------------------------------------------------------------------------------------------------------------------------------------------------------------------------------------------------------------------------------------------------------------------------------------------------------------------------------------------------------------------------------------------------------------------------------------------------------------------------------------------------------|
|  | <p>Acute delayed neurotoxicity:<br/>No adverse effects up to highest dose of 2000 mg/kg bw</p> <p>Developmental neurotoxicity:<br/>No specific study with glyphosate acid available. A data gap is identified to clarify whether the DNT effects seen in the public literature studies with GBHs and in the study with glyphosate trimesium are due to glyphosate acid.</p> <p><b>Epidemiological studies on neurotoxicity</b><br/>Overall inconclusive for a causal or clear associative relationship between glyphosate and neurotoxicity endpoints.</p> |
|--|------------------------------------------------------------------------------------------------------------------------------------------------------------------------------------------------------------------------------------------------------------------------------------------------------------------------------------------------------------------------------------------------------------------------------------------------------------------------------------------------------------------------------------------------------------|

**Other toxicological studies (Regulation (EU) N° 283/2013, Annex Part A, point 5.8)**

Supplementary studies on the active substance

|  |                                                                                                                                                                                                                                                                                                                                                                                                                                                                                                                                                                                        |
|--|----------------------------------------------------------------------------------------------------------------------------------------------------------------------------------------------------------------------------------------------------------------------------------------------------------------------------------------------------------------------------------------------------------------------------------------------------------------------------------------------------------------------------------------------------------------------------------------|
|  | <p><u>Immunotoxicity:</u><br/>No indication of immunotoxic potential in mice. NOAEL = 1448 mg/kg bw per day, the highest dose tested.</p> <p><u>Oxidative stress:</u><br/>Glyphosate may induce oxidative stress, as shown in some <i>in vitro</i> and <i>in vivo</i> studies but increased oxidative stress was not consistently demonstrated in the available studies.</p> <p><b>Epidemiological studies on oxidative stress:</b><br/>Overall inconclusive for a causal or clear associative relationship between glyphosate and oxidative stress parameters from human studies.</p> |
|--|----------------------------------------------------------------------------------------------------------------------------------------------------------------------------------------------------------------------------------------------------------------------------------------------------------------------------------------------------------------------------------------------------------------------------------------------------------------------------------------------------------------------------------------------------------------------------------------|

Endocrine disrupting properties

|  |                                                                                                                                                                                                                                                                                                                   |
|--|-------------------------------------------------------------------------------------------------------------------------------------------------------------------------------------------------------------------------------------------------------------------------------------------------------------------|
|  | <p>Based on the available information and according to the ECHA/EFSA (2018) guidance, the ED criteria according to point 3.6.5 of Annex II to Regulation (EC) No 1107/2009, as amended by Commission Regulation (EU) 2018/605, are not met for the EAS- and T-modalities for the active substance glyphosate.</p> |
|--|-------------------------------------------------------------------------------------------------------------------------------------------------------------------------------------------------------------------------------------------------------------------------------------------------------------------|

Studies performed on metabolites or impurities

AMPA

Oral LD<sub>50</sub> > 5000 mg/kg bw

Dermal LD<sub>50</sub> > 2000 mg/kg bw

AMPA did not show a sensitising potential.

Negative in *in vitro* bacterial gene mutation assay, negative in *in vitro* mammalian gene mutation assay, negative in *in vitro* and *in vivo* micronucleus assay.

28-day rat (NOAEL): 100 mg/kg bw per day based on decreased body weight and increased kidney weight at 350 mg/kg bw per day.

90-day rat:

First study: NOAEL  $\geq$  1000 mg/kg bw per day based on no adverse effects at the highest dose tested.

Second study: NOAEL of 400 mg/kg bw per day based on increased urothelial hyperplasia of the urinary bladder at 1200 mg/kg bw per day.

90-day dog (NOAEL):  $\geq$  263 mg/kg bw per day based on no adverse effects at the highest dose tested

Rat developmental toxicity

First study:

Maternal and developmental NOAEL: 1000 mg/kg bw per day, the highest dose tested

Second study:

Maternal NOAEL: 150 mg/kg bw per day based on increased mucoid faeces, soft stool and hair loss at 400 mg/kg bw per day and above and decreased body weight gain and food consumption at 1000 mg/kg bw per day.

Developmental NOAEL: 400 mg/kg bw/day based on a reduction in foetal weight at 1000 mg/kg bw per day.

It is concluded that AMPA is unlikely to be genotoxic, is of similar toxicity as glyphosate and its reference values can be applied.

N-acetyl AMPA

Oral LD<sub>50</sub> > 5000 mg/kg bw

Negative bacterial gene mutation study, negative *in vitro* chromosomal aberration study, negative *in vitro* mammalian genotoxicity study and a negative *in vivo* micronucleus study. However, as bone marrow exposure is not proven in the latter study, aneugenicity was not sufficiently addressed and therefore no conclusion can be drawn on genotoxicity. In order to address aneugenicity, an *in vitro* micronucleus study was submitted, which is negative.

90-day rat (NOAEL): 374 and 455 mg/kg bw per day in males and females, respectively. Based on abnormal excreta in both sexes and decreased body weight gain in males at 1163 and 1400 mg/kg bw per day in males and females, respectively.

It is concluded that *N*-acetyl AMPA is unlikely to be genotoxic, is of similar toxicity as glyphosate and its reference values can be applied.

N-acetyl glyphosate

Oral LD<sub>50</sub> > 5000 mg/kg bw

Negative bacterial gene mutation study, negative *in vitro* chromosome aberration study, negative *in vitro* mammalian gene mutation study and a negative *in vivo* micronucleus study. However, as bone marrow exposure is not proven in the latter study, aneugenicity was not sufficiently addressed and therefore no conclusion can be drawn on genotoxicity.

90-day rat (NOAEL): 283 mg/kg bw per day based on decreased body weight gain in males at 1157 mg/kg bw per day.

A data gap is set for aneugenicity. Since aneugenicity has a threshold-based mechanism and this metabolite is of no greater toxicity than glyphosate (similar toxicological profile), it is concluded that the same reference values as for glyphosate can be applied.

N-methyl AMPA

Negative bacterial gene mutation study, negative *in vitro* micronucleus study.

It is concluded that *N*-methyl AMPA is unlikely to be genotoxic.

N-glyceryl AMPA

No experimental data available, negative QSAR analysis for bacterial mutagenicity, QSAR data not sufficiently reliable to rule out aneugenicity/clastogenicity.

Since this metabolite was not sufficiently investigated for all three genetic endpoints, a data gap is set for aneugenicity and clastogenicity.

N-malonyl AMPA

No experimental data available, negative QSAR analysis for bacterial mutagenicity, QSAR data not sufficiently reliable to rule out aneugenicity/ clastogenicity.

Since this metabolite was not sufficiently investigated for all three genetic endpoints, a data gap is set for aneugenicity and clastogenicity.

**Medical data (Regulation (EU) N° 283/2013, Annex Part A, point 5.9)**

No critical health effects reported from occupational health surveillance; no convincing evidence of genotoxicity, oxidative stress, carcinogenicity, neurotoxicity or effects on fertility and development in epidemiological studies; poisoning incidents after accidental or voluntary (suicidal) oral intake of large amounts of glyphosate-based herbicides; transient eye irritation as most frequent sign in operators following accidental exposure.

**Summary<sup>6</sup> (Regulation (EU) N°1107/2009, Annex II, point 3.1 and 3.6)**

|                                           | Value<br>(mg/kg bw (per day)) | Study                                                                                                                       | Uncertainty factor |
|-------------------------------------------|-------------------------------|-----------------------------------------------------------------------------------------------------------------------------|--------------------|
| Acceptable Daily Intake (ADI)             | 0.5 <sup>(1)(5)</sup>         | 90-day dog study, supported by 2-year study in rats and covering maternal toxicity in rabbit developmental toxicity studies | 100                |
| Acute Reference Dose (ARfD)               | 1.5 <sup>(2)(5)</sup>         | Developmental toxicity study in rabbits                                                                                     | 100                |
| Acceptable Operator Exposure Level (AOEL) | 0.1 <sup>(1)(5)</sup>         | 90-day dog study and covering maternal toxicity in rabbit developmental toxicity studies                                    | 500 <sup>(4)</sup> |

<sup>6</sup> If available include also reference values for metabolites

Acute Acceptable Operator Exposure Level (AAOEL)

|                       |                                         |                    |
|-----------------------|-----------------------------------------|--------------------|
| 0.3 <sup>(3)(5)</sup> | Developmental toxicity study in rabbits | 500 <sup>(4)</sup> |
|-----------------------|-----------------------------------------|--------------------|

- <sup>(1)</sup> same as previously established (EFSA, 2015); however, based on a different study
- <sup>(2)</sup> previously established ARfD was 0.5 mg/kg bw (EFSA, 2015)
- <sup>(3)</sup> not previously established (EFSA, 2015)
- <sup>(4)</sup> Including correction for limited oral absorption/bioavailability (20%).
- <sup>(5)</sup> Applicable to metabolites AMPA, *N*-acetyl AMPA and *N*-acetyl glyphosate

**Dermal absorption (Regulation (EU) N° 284/2013, Annex Part A, point 7.3)**

Representative formulation (MON 52276, SL formulation, 360 g/L)

|                                                                                                                                                                                                         |
|---------------------------------------------------------------------------------------------------------------------------------------------------------------------------------------------------------|
| <p>Concentrate: 0.096%</p> <p>Spray dilution 1:12.5 (28.8 g/L): 0.23%</p> <p>Spray dilution 1:150 (2.4 g/L): 0.68%</p> <p><i>In vitro</i> human study with representative formulation.</p>              |
| <p>Pro-rata corrections for the representative uses:</p> <p>Uses 1c, 2(b,c), 4(b,c), 5(b,c), 6b: 0.91% for the spray dilution (1.8 g/L)</p> <p>Uses 3a, 3b: 1.21% for the spray dilution (1.35 g/L)</p> |



**Exposure scenarios (Regulation (EU) N° 284/2013, Annex Part A, point 7.2)**

Operators

|                                                                                                                                                                                                                                |                    |                |
|--------------------------------------------------------------------------------------------------------------------------------------------------------------------------------------------------------------------------------|--------------------|----------------|
| <u>Formulation</u> : MON 52276 SL                                                                                                                                                                                              |                    |                |
| <u>Model</u> : EFSA 2015 (last version of calculator from EFSA 2014)                                                                                                                                                           |                    |                |
| <b>Use 1 (a,b,c)</b> : pre-emergence of vegetables (bare soil), max 1.44 kg a.s./ha, tractor-mounted equipment, downward spraying<br>Covering also tractor-mounted application for uses <b>2, 3, 6 and 10</b> (as worst-case). |                    |                |
| Equipment / Exposure                                                                                                                                                                                                           | Short term (%AOEL) | Acute (%AAOEL) |
| No PPE (workwear)                                                                                                                                                                                                              | 3.80               | 5.22           |
| <b>Uses 4(a,b) and 5 (a,b)</b> : orchard crops and vines, 1.44 kg a.s./ha, tractor-mounted equipment, downward spraying<br>Covering also tractor-mounted equipment for uses <b>4c</b> and <b>5c</b> (as worst-case)            |                    |                |
| No PPE (workwear)                                                                                                                                                                                                              | 3.81               | 3.10           |
| <b>Uses 4(a,b) and 5 (a,b)</b> : orchard crops and vines, 1.44 kg a.s./ha, manual hand-held equipment, downward spraying                                                                                                       |                    |                |
| No PPE (workwear) – orchards                                                                                                                                                                                                   | 6.63               | 10.81          |
| - vines                                                                                                                                                                                                                        | 6.63               | 10.81          |
| <b>Uses 4(a,b) and 5 (a,b)</b> : orchard crops and vines, 1.44 kg a.s./ha, manual knapsack equipment, downward spraying                                                                                                        |                    |                |
| No PPE (workwear) – orchards                                                                                                                                                                                                   | 2.19               | 2.95           |
| - vines                                                                                                                                                                                                                        | 2.19               | 2.95           |
| <b>Uses 4(c) and 5 (c)</b> : orchard crops and vines, 0.72 kg a.s./ha, manual knapsack equipment, downward spraying                                                                                                            |                    |                |
| No PPE (workwear)                                                                                                                                                                                                              | 2.59               | 3.81           |
| <b>Uses 7 (a,b)</b> : railway tracks (bare soil), 1.8 kg a.s./ha, tractor-mounted equipment, downward spraying                                                                                                                 |                    |                |
| No PPE (workwear)                                                                                                                                                                                                              | 4.55               | 6.15           |
| <b>Uses 8 and 9</b> : invasive species in agricultural and non-agricultural areas, 1.8 kg a.s./ha, manual knapsack equipment, downward spraying                                                                                |                    |                |
| No PPE (workwear)                                                                                                                                                                                                              | 1.68               | 1.54           |

Workers

|                                                                                                                                             |           |           |
|---------------------------------------------------------------------------------------------------------------------------------------------|-----------|-----------|
| <u>Model</u> : EFSA 2015 (last version of calculator from EFSA 2014)                                                                        |           |           |
| <b>Uses 1 (a, b, c)</b> : pre-emergence of vegetables (as bare soil)<br>Not relevant since re-entry is not necessary shortly after spraying |           |           |
| <b>Uses 2a, 3 (a,b), 10 (a,b,c)</b> : vegetables, 1x 1.44 kg a.s./ha, inspection 2 or 8h (as grassland and lawns)                           |           |           |
| Exposure with workwear (%AOEL)                                                                                                              | 1.37 (2h) | 5.48 (8h) |
| <b>Use 2b</b> : vegetables, 2x 1.08 kg a.s./ha, inspection 2 or 8h (grassland and lawns)                                                    |           |           |
| Exposure with workwear (%AOEL)                                                                                                              | 1.57 (2h) | 6.28 (8h) |
| <b>Use 6 (a,b)</b> : vegetables, inter row application, 1x 1.08 kg a.s./ha, reaching/picking                                                |           |           |

|                                                                                                                            |           |                    |
|----------------------------------------------------------------------------------------------------------------------------|-----------|--------------------|
| Exposure with workwear (%AOEL)                                                                                             | 7.34      | 1.70 (with gloves) |
| <b>Uses 4 (a,b,c) and 5 (a,b,c):</b> orchards crops and vines, 2x 1.44 kg a.s./ha, inspection 2 or 8h                      |           |                    |
| Exposure with workwear (%AOEL)                                                                                             | 2.09 (2h) | 8.36 (8h)          |
| <b>Uses 7 (a,b):</b> railway tracks (as bare soil)<br>Not relevant since re-entry is not necessary shortly after spraying  |           |                    |
| <b>Uses 8 and 9:</b> invasive species in agricultural and non-agricultural areas, 1x 1.8 kg a.s./ha, inspection/irrigation |           |                    |
| Exposure with workwear (%AOEL)                                                                                             | 0.58 (2h) | 2.32 (8h)          |

Bystanders  
(B) and  
residents (R)

|                                                                                                                                              |       |        |          |          |      |
|----------------------------------------------------------------------------------------------------------------------------------------------|-------|--------|----------|----------|------|
| <u>Model:</u> EFSA 2015 (last version of calculator from EFSA 2014)                                                                          |       |        |          |          |      |
| <b>Use 1 (a,b,c):</b> pre-emergence of vegetables (bare soil), 1x 1.44 kg a.s./ha, buffer zone 2-3m                                          |       |        |          |          |      |
| Exposure pathway:                                                                                                                            | Drift | Vapour | Deposits | Re-entry | Sum  |
| R. child (%AOEL)                                                                                                                             | 2.94  | 1.07   | 0.38     | 1.65     | 4.35 |
| R. adult                                                                                                                                     | 0.65  | 0.23   | 0.07     | 0.92     | 1.33 |
| B. child (%AAOEL)                                                                                                                            | 2.52  | 0.36   | 0.35     | 0.55     | -    |
| B. adult                                                                                                                                     | 0.58  | 0.08   | 0.07     | 0.31     | -    |
| <b>Use 2a, 3(a,b), 6(a,b), 10(a,b,c):</b> vegetables, 1x 1.44 kg a.s./ha, buffer zone 2-3m                                                   |       |        |          |          |      |
| R. child (%AOEL)                                                                                                                             | 2.94  | 1.07   | 0.38     | 1.65     | 4.35 |
| R. adult                                                                                                                                     | 0.65  | 0.23   | 0.07     | 0.92     | 1.33 |
| B. child (%AAOEL)                                                                                                                            | 2.52  | 0.36   | 0.35     | 0.55     | -    |
| B. adult                                                                                                                                     | 0.58  | 0.08   | 0.07     | 0.31     | -    |
| <b>Use 2(b,c):</b> vegetables, 2x 1.08 kg a.s./ha, buffer zone 2-3m                                                                          |       |        |          |          |      |
| R. child (%AOEL)                                                                                                                             | 2.21  | 1.07   | 0.43     | 1.89     | 4.16 |
| R. adult                                                                                                                                     | 0.49  | 0.23   | 0.08     | 1.05     | 1.36 |
| B. child (%AAOEL)                                                                                                                            | 1.89  | 0.36   | 0.40     | 0.63     | -    |
| B. adult                                                                                                                                     | 0.43  | 0.08   | 0.08     | 0.35     | -    |
| <b>Uses 4(a,b,c) and 5(a,b,c):</b> orchard crops and vines (cereal scenario with downward application), 2x 1.44 kg a.s./ha, buffer zone 2-3m |       |        |          |          |      |
| R. child (%AOEL)                                                                                                                             | 2.94  | 1.07   | 0.57     | 2.52     | 5.19 |
| R. adult                                                                                                                                     | 0.650 | 0.23   | 0.10     | 1.40     | 1.75 |
| B. child (%AAOEL)                                                                                                                            | 2.52  | 0.36   | 0.53     | 0.84     | -    |
| B. adult                                                                                                                                     | 0.58  | 0.08   | 0.10     | 0.47     | -    |
| <b>Uses 7(a, b):</b> railway tracks, 2x 1.8 kg a.s./ha, buffer zone 2-3m                                                                     |       |        |          |          |      |
| R. child (%AOEL)                                                                                                                             | 3.68  | 1.07   | 0.53     | 2.32     | 5.42 |
| R. adult                                                                                                                                     | 0.82  | 0.23   | 0.09     | 1.29     | 1.73 |
| B. child (%AAOEL)                                                                                                                            | 3.15  | 0.36   | 0.49     | 0.77     | -    |
| B. adult                                                                                                                                     | 0.72  | 0.08   | 0.09     | 0.43     | -    |

|                                                                                                                                                                                    |       |      |      |      |       |
|------------------------------------------------------------------------------------------------------------------------------------------------------------------------------------|-------|------|------|------|-------|
| <b>Use 8:</b> invasive species in agricultural areas (cereal scenario), 1x 1.8 kg a.s./ha, buffer zone 2-3m                                                                        |       |      |      |      |       |
| R. child (%AOEL)                                                                                                                                                                   | 30.12 | 1.07 | 0.35 | 0.70 | 20.23 |
| R. adult                                                                                                                                                                           | 5.92  | 0.23 | 0.03 | 0.39 | 3.63  |
| B. child (%AAOEL)                                                                                                                                                                  | 30.19 | 0.36 | 0.32 | 0.23 | -     |
| B. adult                                                                                                                                                                           | 5.56  | 0.08 | 0.03 | 0.13 | -     |
| <b>Use 9:</b> invasive species in non-agricultural areas (e.g. turf), 1x 1.8 kg a.s./ha, buffer zone 2-3m<br>Recreational exposure: 6.3% of AOEL for child, 0.5% of AOEL for adult |       |      |      |      |       |
| R. child (%AOEL)                                                                                                                                                                   | 30.12 | 1.07 | 0.35 | 2.36 | 19.80 |
| R. adult                                                                                                                                                                           | 5.92  | 0.23 | 0.03 | 0.06 | 3.38  |
| B. child (%AAOEL)                                                                                                                                                                  | 30.19 | 0.36 | 0.32 | 0.92 | -     |
| B. adult                                                                                                                                                                           | 5.56  | 0.08 | 0.03 | 0.04 | -     |

**Classification with regard to toxicological data (Regulation (EU) N° 283/2013, Annex Part A, Section 10)**

Substance:

Harmonised classification according to Regulation (EC) No 1272/2008 and its Adaptations to Technical Process [Table 3.1 of Annex VI of Regulation (EC) No 1272/2008 as amended]<sup>7 8</sup>:

According to the peer review, criteria for harmonised classification according to Regulation (EC) No 1272/2008 may be met for:

|                                               |
|-----------------------------------------------|
| glyphosate                                    |
| Eye Damage 1 H318 - Causes serious eye damage |
| Same as above                                 |

<sup>7</sup> Regulation (EC) No 1272/2008 of the European Parliament and of the Council of 16 December 2008 on classification, labelling and packaging of substances and mixtures, amending and repealing Directives 67/548/EEC and 1999/45/EC, and amending Regulation (EC) No 1907/2006. OJ L 353, 31.12.2008, 1-1355.

<sup>8</sup> ECHA (European Chemicals Agency), 2022. Committee for Risk Assessment (RAC) Opinion proposing harmonised classification and labelling at EU level of glyphosate (ISO); N-(phosphonomethyl)glycine. CLH-O-0000007122-85-01/F. Adopted 30 May 2022. Available at [www.echa.europa.eu](http://www.echa.europa.eu)

**Residues in or on treated products food and feed****Metabolism studies, methods of analysis and residue definitions in plants**

| Primary crops<br>(available studies)  | Crop groups     | Crop(s)        | Application(s)                                                                                                                                                                   | Sampling (DAT)        | Comment/Source       |
|---------------------------------------|-----------------|----------------|----------------------------------------------------------------------------------------------------------------------------------------------------------------------------------|-----------------------|----------------------|
| <b>Conventional crops<sup>9</sup></b> | Fruit crops     | Citrus (lemon) | Soil application at 3.9 kg/ha (expressed in glyphosate equiv.)                                                                                                                   | 3, 2 months, 4 months | Glyphosate-trimesium |
|                                       |                 | Grapes         | Soil application at 8.1 N-(phosphon-methyl)glycine-label (PMG-label) and 7.8 kg/ha trimesium-label (TMS-label) corresponding to 5.6 or 5.4 kg glyphosate equiv./ha, respectively | 14, 365               | Glyphosate-trimesium |
|                                       |                 |                | Overspray on bunches at 14.3 mg per 10 bunches (PMG-label) and 13.2 mg per 10 bunches (TMS-label) corresponding to 9.9 mg and 9.1 mg expressed as glyphosate equivalents         | 14                    | Glyphosate-trimesium |
|                                       |                 | Grapes         | Soil application (drench) at 8.3 kg/ha (PMG-label) (corresponding to 5.7 kg glyphosate equiv./ha) or 7.1 kg/ha (TMS label) (corresponding to 4.9 kg glyphosate equiv./ha)        | 7                     | Glyphosate-trimesium |
|                                       | Cereals/grass   | Wheat          | Foliar application at 5.64 kg/ha (corresponding to 3.89 kg glyphosate equiv./ha)                                                                                                 | 7                     | Glyphosate-trimesium |
|                                       | Pulses/oilseeds | Soya bean      | Soil drench at 8.4 kg/ha                                                                                                                                                         | 31, 97                | Glyphosate-trimesium |

<sup>9</sup> Additional metabolism studies in primary crops were available in fruits, root crops, cereals, pulses and sugar cane which were considered only supportive and are not reported in this table.

| Primary crops<br>(available studies)      | Crop groups     | Crop(s)                                                   | Application(s)                                                                                                                                                                                                                                       | Sampling (DAT)                | Comment/Source                       |
|-------------------------------------------|-----------------|-----------------------------------------------------------|------------------------------------------------------------------------------------------------------------------------------------------------------------------------------------------------------------------------------------------------------|-------------------------------|--------------------------------------|
|                                           |                 | Coffee                                                    | Soil application at 4.5 kg/ha                                                                                                                                                                                                                        | 28, 42, 56                    | Glyphosate and AMPA, different plots |
|                                           |                 |                                                           | Stem treatment at 1.9 mg/plant                                                                                                                                                                                                                       | 35                            | Glyphosate                           |
|                                           |                 |                                                           | Foliar application at 0.32 mg/plant, only upper or only lower leaf surface; 0.64 mg/plant, upper and lower surface treated; 0.608 mg/plant, both surfaces treated, used for further extraction; 1.9 mg/plant lower leaf surface on a tree with beans | 21, 35<br>Every 28 days<br>35 | Glyphosate                           |
| <b>CP4 EPSPS &amp; GOX modified crops</b> | Root crops      | Sugar beet                                                | Pre-emergence at 0.9 kg/ha                                                                                                                                                                                                                           | 158                           | Glyphosate                           |
|                                           |                 |                                                           | Post-emergence 2x 1.08 kg/ha                                                                                                                                                                                                                         | 91                            |                                      |
|                                           | Cereals/grass   | Wheat                                                     | Spray applications 2x 0.84 kg/ha                                                                                                                                                                                                                     | 5, 24-30, 84                  | Glyphosate                           |
|                                           |                 | Maize                                                     | Spray applications 1x 0.93 kg/ha and 1x 0.84 kg/ha                                                                                                                                                                                                   | 0, 37, 49-53, 83              | Glyphosate                           |
|                                           | Pulses/oilseeds | Canola                                                    | Post-emergence 1x 0.455 kg/ha                                                                                                                                                                                                                        | 87                            | Glyphosate                           |
|                                           |                 |                                                           | Post-emergence 2x 0.90 kg/ha                                                                                                                                                                                                                         | 79                            |                                      |
|                                           |                 | Soya bean                                                 | Pre-emergence 1x 5.38 kg/ha                                                                                                                                                                                                                          | 56, 84, 104                   | Glyphosate                           |
|                                           |                 |                                                           | Early post-emergence 1x 0.84 kg/ha                                                                                                                                                                                                                   | 35, 63, 83                    |                                      |
|                                           |                 | Sequential post-emergence 1x 0.84 kg/ha and 1x 1.68 kg/ha | 13, 41, 61                                                                                                                                                                                                                                           |                               |                                      |
|                                           | Cotton          | Spray applications 1x 0.93 kg/ha and 1x 1.27 kg/ha        | 0, 27, 158                                                                                                                                                                                                                                           | Glyphosate                    |                                      |
| <b>GAT modified crops</b>                 | Root crops      | Maize                                                     | Pre-emergence 1x 4.26 kg/ha to bare soil and foliar applications 3x 1.1 kg/ha                                                                                                                                                                        | 48 DAT soil, 59 DAT3, 7 DAT4  | Glyphosate                           |
|                                           | Pulses/oilseeds | Canola                                                    | Pre-emergence 1x 4.5 kg/ha to bare soil and foliar applications 3x 1.0 kg/ha                                                                                                                                                                         | 38 DAT3, 90 DAT3, 7 DAT4      | Glyphosate                           |

| <b>Primary crops</b><br>(available studies) | <b>Crop groups</b> | <b>Crop(s)</b> | <b>Application(s)</b>                                                                                     | <b>Sampling (DAT)</b>                 | <b>Comment/Source</b> |
|---------------------------------------------|--------------------|----------------|-----------------------------------------------------------------------------------------------------------|---------------------------------------|-----------------------|
|                                             |                    | Soya bean      | Pre-emergence 1x 3.290 kg/ha to bare soil and 3 foliar applications 1x 1.410, 1x 2.284 and 1x 0.880 kg/ha | 36 DAT soil, 4 DAT2, 82 DAT3, 14 DAT4 | Glyphosate            |

| Rotational crops<br>(available studies) | Crop groups               | Crop(s) | Application(s)                                                                                                                                                                       | PBI (DAT)    | Comment/Source       |
|-----------------------------------------|---------------------------|---------|--------------------------------------------------------------------------------------------------------------------------------------------------------------------------------------|--------------|----------------------|
|                                         | Root/ crops <sup>10</sup> | Radish  | Primary crop soya bean seeds were planted immediately prior to application; soil application at 3.87 kg/ha (expressed as glyphosate equivalents)                                     | 35           | Glyphosate-trimesium |
|                                         |                           |         | Primary crop soya bean seeds were planted immediately prior to application; soil application at 6.56 kg/ha split in three monthly applications (expressed as glyphosate equivalents) | 63, 308      | Glyphosate-trimesium |
|                                         |                           | Carrot  | Application on planted rye grass at 4.16 kg/ha; crop of soya beans was planted 7 days after application                                                                              | 30, 119, 364 | Glyphosate           |
|                                         | Leafy crops               | Lettuce | Primary crop soya bean seeds were planted immediately prior to application; soil application at 3.87 kg/ha (expressed as glyphosate equivalents)                                     | 35           | Glyphosate-trimesium |
|                                         |                           |         | Primary crop soya bean seeds were planted immediately prior to application; soil application at 6.56 kg/ha split in three monthly applications (expressed as glyphosate equivalents) | 63, 308      | Glyphosate-trimesium |
|                                         |                           |         | Application on planted rye grass at 4.16 kg/ha; crop of soya beans was planted 7 days after application                                                                              | 30, 119, 364 | Glyphosate           |

<sup>10</sup> Several non-fully guideline compliant studies which show no contradictory results and are considered supportive are available and not reported in this table.

|                      |        |                                                                                                                                                                                      |              |                      |
|----------------------|--------|--------------------------------------------------------------------------------------------------------------------------------------------------------------------------------------|--------------|----------------------|
| Cereal (small grain) | Wheat  | Primary crop soya bean seeds were planted immediately prior to application; soil application at 3.87 kg/ha (expressed as glyphosate equivalents)                                     | 35           | Glyphosate-trimesium |
|                      |        | Primary crop soya bean seeds were planted immediately prior to application; soil application at 6.56 kg/ha split in three monthly applications (expressed as glyphosate equivalents) | 63, 308      | Glyphosate-trimesium |
|                      | Barley | Application on planted rye grass at 4.16 kg/ha; crop of soya beans was planted 7 days after application                                                                              | 30, 119, 364 | Glyphosate           |



| Processed commodities | Conditions                                        | Stable? | Comment/Source                                                                             |
|-----------------------|---------------------------------------------------|---------|--------------------------------------------------------------------------------------------|
| (hydrolysis study)    | Pasteurisation (20 min, 90°C, pH 4)               | Yes     | Data available for glyphosate, AMPA, <i>N</i> -acetyl glyphosate and <i>N</i> -acetyl AMPA |
|                       | Baking, brewing and boiling (60 min, 100°C, pH 5) | Yes     | Data available for glyphosate, AMPA, <i>N</i> -acetyl glyphosate and <i>N</i> -acetyl AMPA |
|                       | Sterilisation (20 min, 120°C, pH 6)               | Yes     | Data available for glyphosate, AMPA, <i>N</i> -acetyl glyphosate and <i>N</i> -acetyl AMPA |
|                       | Other processing conditions                       | --      | No data available, not required                                                            |

|                                                                                         |                                                                                                                                                                                                                                                                                                                                                                                                                                                                                                        |                                                                                        |
|-----------------------------------------------------------------------------------------|--------------------------------------------------------------------------------------------------------------------------------------------------------------------------------------------------------------------------------------------------------------------------------------------------------------------------------------------------------------------------------------------------------------------------------------------------------------------------------------------------------|----------------------------------------------------------------------------------------|
| Can a general residue definition be proposed for primary crops?                         | No                                                                                                                                                                                                                                                                                                                                                                                                                                                                                                     | Different residue definitions proposed for conventional and genetically modified crops |
| Rotational crop and primary crop metabolism similar?                                    | Yes                                                                                                                                                                                                                                                                                                                                                                                                                                                                                                    |                                                                                        |
| Residue pattern in processed commodities similar to residue pattern in raw commodities? | Yes                                                                                                                                                                                                                                                                                                                                                                                                                                                                                                    |                                                                                        |
| Plant residue definition for monitoring (RD-Mo)                                         | <p><b>Option 1 - According to Codex (FAO-WHO, 2019)<sup>11</sup>:</b></p> <ol style="list-style-type: none"> <li>1) For soya bean, oilseed rape (OSR), maize (including sweet corn)<sup>12</sup>: Sum of glyphosate and <i>N</i>-acetyl glyphosate, expressed as glyphosate</li> <li>2) All other crops: Glyphosate only</li> </ol> <p><b>Option 2- According to the proposal in the EFSA MRL Art.12 Reasoned Opinion of 2019<sup>13</sup>,</b> including also the metabolite AMPA for some crops:</p> |                                                                                        |

<sup>11</sup> FAO and WHO. 2019. *Pesticide residues in food 2019 – Extra Joint FAO/WHO Meeting on Pesticide Residues Evaluation Part I: Residues*. Rome. <https://www.fao.org/publications/card/en/c/CA6010EN/>

<sup>12</sup> Due to the potential presence of glyphosate tolerant sources in the market (eg. imported products) risk managers should consider to apply the proposed residue definition to all the monitored samples from these crops.

<sup>13</sup> EFSA (European Food Safety Authority), 2019. Review of the existing maximum residue levels for glyphosate according to Article 12 of Regulation (EC) No 396/2005 – revised version to take into account omitted data. *EFSA Journal* 2019;17(10):5862 doi:10.2903/j.efsa.2019.5862

|                                                                                            |                                                                                                                                                                                                                                                                                                                                                                                                                                                                                                                                                                                                                                                                                                                                                                                                                                                                                                         |
|--------------------------------------------------------------------------------------------|---------------------------------------------------------------------------------------------------------------------------------------------------------------------------------------------------------------------------------------------------------------------------------------------------------------------------------------------------------------------------------------------------------------------------------------------------------------------------------------------------------------------------------------------------------------------------------------------------------------------------------------------------------------------------------------------------------------------------------------------------------------------------------------------------------------------------------------------------------------------------------------------------------|
|                                                                                            | <ol style="list-style-type: none"> <li>1) For soya bean, OSR, cotton, maize (including sweet corn), sugar beet<sup>14</sup>: Sum of glyphosate, AMPA and <i>N</i>-acetyl glyphosate, expressed as glyphosate</li> <li>2) All other crops: Glyphosate only</li> </ol> <p>The inclusion of AMPA in the residue definition for plants may need to be further considered once the information on additional field residue trials and on the magnitude of residues in rotational crops is completed (see data gaps).</p> <p>For <b>honey and bee products</b>, the same residue definitions as for primary crops apply. It is noted that a validated analytical method for monitoring of <i>N</i>-acetyl glyphosate residues in honey is not available (<b>data gap, not originating from the representative uses but <i>N</i>-acetyl glyphosate has the potential to be present in imported honey</b>).</p> |
| Plant residue definition for risk assessment (RD-RA)                                       | <p><b>Conventional crops:</b> Sum of glyphosate and AMPA, expressed as glyphosate.<br/> <b>Glyphosate tolerant crops:</b> Sum of glyphosate, AMPA, <i>N</i>-acetyl glyphosate and <i>N</i>-acetyl AMPA, expressed as glyphosate</p> <p>It should be noted that the aneugenicity of <i>N</i>-acetyl glyphosate has not been addressed (data gap).</p> <p>For <b>honey and bee products</b>, the same residue definitions as for primary crops apply.</p>                                                                                                                                                                                                                                                                                                                                                                                                                                                 |
| Methods of analysis for monitoring of residues (analytical technique, matrix groups, LOQs) | <p>LC MS/MS<br/> LOQ 0.025 mg/kg for glyphosate, AMPA and <i>N</i>-acetyl glyphosate</p>                                                                                                                                                                                                                                                                                                                                                                                                                                                                                                                                                                                                                                                                                                                                                                                                                |

<sup>14</sup> Due to the potential presence of glyphosate tolerant sources in the market (eg. imported products) risk managers should consider to apply the proposed residue definition to all the monitored samples from these crops.

**Stability of residues in plants**

| Plant products<br>(available studies) | Category             | Commodity                                | T (°C) | Stability period |        | Comment/Source                                                                                                                            |
|---------------------------------------|----------------------|------------------------------------------|--------|------------------|--------|-------------------------------------------------------------------------------------------------------------------------------------------|
|                                       |                      |                                          |        | Value            | Unit   |                                                                                                                                           |
| <b>Glyphosate</b>                     |                      |                                          |        |                  |        |                                                                                                                                           |
|                                       | High water content   | Sugar beet leaves                        | -18    | 18               | Months | Maximum general storage stability in high water content commodities:<br><u>24 months</u>                                                  |
|                                       |                      | Maize forage/green plant                 | -18    | 12               | Months |                                                                                                                                           |
|                                       |                      | Soya bean forage                         | -18    | Max. 24          | Months |                                                                                                                                           |
|                                       |                      | Tomato                                   | -18    | 31               | Months |                                                                                                                                           |
|                                       |                      | Clover                                   | -18    | 31               | Months |                                                                                                                                           |
|                                       |                      | Banana (whole fruit)                     | -18    | 12               | Months |                                                                                                                                           |
|                                       | High starch content  | Maize grain                              | -18    | Max. 24          | Months | Maximum general storage stability in high starch content commodities:<br><u>24 months</u>                                                 |
|                                       |                      | Barley grain                             | -18    | 18               | Months |                                                                                                                                           |
|                                       |                      | Wheat/rye grain (whole commodity)        | -18    | 45               | Months |                                                                                                                                           |
|                                       |                      | Sugar beet roots                         | -18    | 18               | Months |                                                                                                                                           |
|                                       | High oil content     | Soya bean seeds                          | -18    | 12               | Months | Storage stability in oilseeds, at least:<br>12 months<br><u>No extrapolation across category of high oil content commodities possible</u> |
|                                       |                      | Oilseed rape/ linseeds (whole commodity) | -18    | 18               | Months |                                                                                                                                           |
|                                       | High protein content | Dry beans                                | -18    | 18               | Months | Maximum general storage stability in high protein content commodities:<br><u>18 months</u>                                                |
|                                       | High acid content    | Orange                                   | -18    | 24               | Months | Maximum storage stability in citrus fruit:<br>24 months<br><u>No extrapolation across category of high</u>                                |

| Plant products<br>(available studies) | Category            | Commodity                         | T (°C) | Stability period |        | Comment/Source                                                                                         |  |
|---------------------------------------|---------------------|-----------------------------------|--------|------------------|--------|--------------------------------------------------------------------------------------------------------|--|
|                                       |                     |                                   |        | Value            | Unit   |                                                                                                        |  |
|                                       |                     |                                   |        |                  |        | <u>acid content commodities possible</u>                                                               |  |
|                                       | Other matrices      | Barley straw                      | -18    | 18               | Months |                                                                                                        |  |
|                                       |                     | Wheat/rye straw (chopped)         | -18    | 45               | Months |                                                                                                        |  |
|                                       |                     |                                   |        |                  |        |                                                                                                        |  |
|                                       |                     | Soya bean hay                     | -18    | 12               | Months |                                                                                                        |  |
|                                       |                     | Maize stover                      | -18    | 23               | Months |                                                                                                        |  |
|                                       |                     | Sorghum stover                    | -18    | 31               | Months |                                                                                                        |  |
| <b>AMPA</b>                           |                     |                                   |        |                  |        |                                                                                                        |  |
|                                       | High water content  | Sugar beet leaves                 | -18    | 18               | Months | Maximum general storage stability in high water content commodities:<br><u>6 months</u>                |  |
|                                       |                     | Maize forage/green plants         | -18    | 12               | Months |                                                                                                        |  |
|                                       |                     | Soya bean forage                  | -18    | 24               | Months |                                                                                                        |  |
|                                       |                     | Tomato                            | -18    | 31               | Months |                                                                                                        |  |
|                                       |                     | Clover                            | -18    | Max. 6           | Months |                                                                                                        |  |
|                                       | High starch content | Maize grain                       | -18    | 31               | Months | Maximum general storage stability in high starch content commodities:<br><u>12 months</u>              |  |
|                                       |                     | Barley grain                      | -18    | Max. 12          | Months |                                                                                                        |  |
|                                       |                     | Wheat/rye grain (whole commodity) | -18    | Max. 10          | Months |                                                                                                        |  |
|                                       |                     |                                   |        |                  |        |                                                                                                        |  |
|                                       |                     | Sugar beet roots                  | -18    | Max. 12          | Months |                                                                                                        |  |
|                                       | High oil content    | Soya bean seeds                   | -18    | 12               | Months | Maximum storage stability in oilseeds:<br>12 months<br><u>No extrapolation across category of high</u> |  |

| Plant products<br>(available studies) | Category             | Commodity                 | T (°C) | Stability period |        | Comment/Source                                                                                                                                       |
|---------------------------------------|----------------------|---------------------------|--------|------------------|--------|------------------------------------------------------------------------------------------------------------------------------------------------------|
|                                       |                      |                           |        | Value            | Unit   |                                                                                                                                                      |
|                                       |                      |                           |        |                  |        | <u>oil content commodities possible</u>                                                                                                              |
|                                       | High protein content | Dry beans (interim study) | -18    | 12               | Months | Maximum general storage stability in high protein content commodities:<br><u>12 months</u>                                                           |
|                                       | High acid content    | Orange                    | -18    | 24               | Months | Maximum storage stability in citrus fruit:<br>24 months<br><u>No extrapolation across category of high acid content commodities possible</u>         |
|                                       | Other matrices       | Maize stover              | -18    | Max. 9           | Months | An overall extrapolation was confirmed for the storage stability of AMPA of at least 6 months for all commodities, including processed commodities   |
|                                       |                      | Wheat/rye straw (chopped) | -18    | Max. 6           | Months |                                                                                                                                                      |
|                                       |                      | Soya bean hay             | -18    | 9                | Months |                                                                                                                                                      |
|                                       |                      | Sorghum stover/straw      | -18    | Max. 9           | Months |                                                                                                                                                      |
|                                       |                      |                           |        |                  |        |                                                                                                                                                      |
| <b><i>N</i>-acetyl glyphosate</b>     |                      |                           |        |                  |        |                                                                                                                                                      |
|                                       | High water content   | Maize forage/ green plant | -18    | 12               | Months | Maximum storage stability in forage/fodder crops:<br>12 months<br><u>No extrapolation across category of high water content commodities possible</u> |
|                                       |                      | Soya bean forage          | -18    | 12               | Months |                                                                                                                                                      |
|                                       | High starch content  | Maize grain               | -18    | 12               | Months | Maximum storage stability in cereal grain:<br>12 months<br><u>No extrapolation across category of high starch content commodities possible</u>       |
|                                       | High oil             | Soya bean seed            | -18    | 12               | Months | Maximum storage stability in oilseeds:                                                                                                               |

| Plant products<br>(available studies) | Category            | Commodity                 | T (°C) | Stability period |        | Comment/Source                                                                                                                                         |
|---------------------------------------|---------------------|---------------------------|--------|------------------|--------|--------------------------------------------------------------------------------------------------------------------------------------------------------|
|                                       |                     |                           |        | Value            | Unit   |                                                                                                                                                        |
|                                       | content             |                           |        |                  |        | 12 months<br><u>No extrapolation across category of high oil content commodities possible</u>                                                          |
|                                       | Other matrices      | Maize stover              | -18    | Max. 12          | Months |                                                                                                                                                        |
|                                       |                     | Soya bean hay             | -18    | 12               | Months |                                                                                                                                                        |
| <b><i>N-acetyl AMPA</i></b>           |                     |                           |        |                  |        |                                                                                                                                                        |
|                                       | High water content  | Maize forage/ green plant | -18    | 23               | Months | Storage stability in forage/fodder crops, at least:<br>18 months<br><u>No extrapolation across category of high water content commodities possible</u> |
|                                       |                     | Soya bean forage          | -18    | 18               | Months |                                                                                                                                                        |
|                                       | High starch content | Maize grain               | -18    | 23               | Months | Maximum storage stability in cereal grain:<br>23 months<br><u>No extrapolation across category of high starch content commodities possible</u>         |
|                                       | High oil content    | Soya bean seed            | -18    | 18               | Months | Maximum storage stability in oilseeds:<br>18 months<br><u>No extrapolation across category of high oil content commodities possible</u>                |
|                                       | Other matrices      | Maize stover              | -18    | 23               | Months |                                                                                                                                                        |
|                                       |                     | Soya bean hay             | -18    | 18               | Months |                                                                                                                                                        |

**Magnitude of residues in plants****Summary of residues data from the supervised residue trials – Primary crops**

| <b>Commodity</b>           | <b>Region/<br/>Indoor</b><br>(a) | <b>Residue levels observed in the supervised residue trials</b><br>(mg/kg)<br><b>Mo:</b> Glyphosate<br><b>RA:</b> Sum of glyphosate and AMPA, expressed as glyphosate | <b>Comments/Source</b>                                                                                                                                                                                                                                                                                                                                                                                                                              | <b>Calculated MRL</b><br>(mg/kg)   | <b>HR</b> (b)<br>(mg/kg)           | <b>STMR</b> (c)<br>(mg/kg)         | <b>CF</b><br>(d) |
|----------------------------|----------------------------------|-----------------------------------------------------------------------------------------------------------------------------------------------------------------------|-----------------------------------------------------------------------------------------------------------------------------------------------------------------------------------------------------------------------------------------------------------------------------------------------------------------------------------------------------------------------------------------------------------------------------------------------------|------------------------------------|------------------------------------|------------------------------------|------------------|
| <b>Post-emergence uses</b> |                                  |                                                                                                                                                                       |                                                                                                                                                                                                                                                                                                                                                                                                                                                     |                                    |                                    |                                    |                  |
| Apple                      | NEU                              | <b>Mo:</b> 2x <0.05<br><b>RA:</b> 2x <0.126                                                                                                                           | <u>Data gap:</u> 6 NEU + 7 SEU additional residue trials in grapes with AMPA/glyphosate analysed within the demonstrated storage stability period or studies demonstrating a longer storage stability of AMPA are needed. The results from these trials can cover the uses in kiwi, pome fruit, citrus fruit, stone fruit and tree nuts (relevant for the representative use in grapes, kiwi, pome fruit, citrus fruit, stone fruit and tree nuts). | -                                  | Mo: 0.05<br>RA: 0.126 <sup>#</sup> | Mo: 0.05<br>RA: 0.126 <sup>#</sup> |                  |
|                            | SEU                              | <b>Mo:</b> 2x <0.05<br><b>RA:</b> 2x <0.126                                                                                                                           |                                                                                                                                                                                                                                                                                                                                                                                                                                                     | -                                  | Mo: 0.05<br>RA: 0.126 <sup>#</sup> | Mo: 0.05<br>RA: 0.126 <sup>#</sup> |                  |
| Plum                       | NEU                              | <b>Mo:</b> 1x <0.05<br><b>RA:</b> 1x <0.126                                                                                                                           |                                                                                                                                                                                                                                                                                                                                                                                                                                                     | -                                  | Mo: 0.05<br>RA: 0.126 <sup>#</sup> | Mo: 0.05<br>RA: 0.126 <sup>#</sup> |                  |
|                            | SEU                              | <b>Mo:</b> 6x <0.05<br><b>RA:</b> 2x <0.126                                                                                                                           |                                                                                                                                                                                                                                                                                                                                                                                                                                                     | Mo: 0.05<br>RA: 0.126 <sup>#</sup> | Mo: 0.05<br>RA: 0.126 <sup>#</sup> |                                    |                  |
| Apricot                    | SEU                              | <b>Mo:</b> 4x <0.05<br><b>RA:</b> 4x <0.126                                                                                                                           |                                                                                                                                                                                                                                                                                                                                                                                                                                                     | -                                  | Mo: 0.05<br>RA: 0.126              | Mo: 0.05<br>RA: 0.126              |                  |
| Cherry                     | SEU                              | <b>Mo:</b> 2x <0.05<br><b>RA:</b> 2x <0.126                                                                                                                           |                                                                                                                                                                                                                                                                                                                                                                                                                                                     | -                                  | Mo: 0.05<br>RA: 0.126 <sup>#</sup> | Mo: 0.05<br>RA: 0.126 <sup>#</sup> |                  |

| <b>Commodity</b> | <b>Region/<br/>Indoor</b><br>(a) | <b>Residue levels observed in the supervised residue trials</b><br>(mg/kg)<br><b>Mo:</b> Glyphosate<br><b>RA:</b> Sum of glyphosate and AMPA, expressed as glyphosate | <b>Comments/Source</b> | <b>Calculated MRL</b><br>(mg/kg) | <b>HR</b> (b)<br>(mg/kg)           | <b>STMR</b> (c)<br>(mg/kg)         | <b>CF</b><br>(d) |
|------------------|----------------------------------|-----------------------------------------------------------------------------------------------------------------------------------------------------------------------|------------------------|----------------------------------|------------------------------------|------------------------------------|------------------|
| Peach            | SEU                              | <b>Mo:</b> <0.05<br><b>RA:</b> <0.126                                                                                                                                 |                        | -                                | Mo: 0.05<br>RA: 0.126 <sup>#</sup> | Mo: 0.05<br>RA: 0.126 <sup>#</sup> |                  |
| Grapes           | NEU                              | <b>Mo:</b> 9x <0.05<br><b>RA:</b> 2x <0.126                                                                                                                           |                        | -                                | Mo: 0.05<br>RA: 0.126 <sup>#</sup> | Mo: 0.05<br>RA: 0.126 <sup>#</sup> |                  |
|                  | SEU                              | <b>Mo:</b> 8x <0.05<br><b>RA:</b> <0.126                                                                                                                              |                        | -                                | Mo: 0.05<br>RA: 0.126 <sup>#</sup> | Mo: 0.05<br>RA: 0.126 <sup>#</sup> |                  |
| Mandarins        | SEU                              | <b>Mo:</b> 2x <0.05<br><b>RA:</b> 2x <0.126                                                                                                                           |                        | -                                | Mo: 0.05<br>RA: 0.126 <sup>#</sup> | Mo: 0.05<br>RA: 0.126 <sup>#</sup> |                  |
| Oranges          | SEU                              | <b>Mo:</b> 2x <0.05<br><b>RA:</b> 2x <0.126                                                                                                                           |                        | -                                | Mo: 0.05<br>RA: 0.126 <sup>#</sup> | Mo: 0.05<br>RA: 0.126 <sup>#</sup> |                  |
| Pistachio        | SEU                              | <b>Mo:</b> <0.05<br><b>RA:</b> <0.126                                                                                                                                 |                        | -                                | Mo: 0.05<br>RA: 0.126 <sup>#</sup> | Mo: 0.05<br>RA: 0.126 <sup>#</sup> |                  |
| Hazelnut         | SEU                              | <b>Mo:</b> <0.05<br><b>RA:</b> <0.126                                                                                                                                 |                        | -                                | Mo: 0.05<br>RA: 0.126 <sup>#</sup> | Mo: 0.05<br>RA: 0.126 <sup>#</sup> |                  |
| Kiwi             | SEU                              | <b>Mo:</b> 2x <0.05<br><b>RA:</b> 2x <0.126                                                                                                                           |                        | -                                | Mo: 0.05<br>RA: 0.126 <sup>#</sup> | Mo: 0.05<br>RA: 0.126 <sup>#</sup> |                  |



| Commodity                                                        | Region/<br>Indoor<br>(a) | Residue levels observed in the supervised residue trials (mg/kg)<br><b>Mo:</b> Glyphosate<br><b>RA:</b> Sum of glyphosate and AMPA, expressed as glyphosate | Comments/Source                                                                                                                                                                                                                                                              | Calculated MRL (mg/kg) | HR <sup>(b)</sup> (mg/kg)          | STMR <sup>(c)</sup> (mg/kg)        | CF <sup>(d)</sup> |
|------------------------------------------------------------------|--------------------------|-------------------------------------------------------------------------------------------------------------------------------------------------------------|------------------------------------------------------------------------------------------------------------------------------------------------------------------------------------------------------------------------------------------------------------------------------|------------------------|------------------------------------|------------------------------------|-------------------|
| Olives                                                           | SEU                      | <b>Mo:</b> 0.11; 0.14; 0.53; 0.93<br><b>RA:</b> data for AMPA not available                                                                                 | <u>Data gap:</u> at least 4 NEU residue trials with analysis of glyphosate and AMPA + at least 4 SEU residue trials with AMPA/glyphosate analysed within the demonstrated storage stability period. (relevant for the representative use in table olives).                   | -                      | Mo: 0.93                           | Mo: 0.335                          |                   |
| Banana                                                           | SEU                      | <b>Mo:</b> 3x <0.05<br><b>RA:</b> data for AMPA not available                                                                                               | <u>Data gap:</u> At least 3 SEU additional residue trials with AMPA/glyphosate analysed within the demonstrated storage stability period or studies demonstrating a longer storage stability of AMPA in banana. (relevant for the representative use in banana).             | -                      | Mo: 0.05                           | Mo: 0.05                           |                   |
| <b>Post-harvest, pre-sowing, pre-planting, pre-emergence use</b> |                          |                                                                                                                                                             |                                                                                                                                                                                                                                                                              |                        |                                    |                                    |                   |
| Potato                                                           | NEU                      | <b>Mo:</b> 2x <0.05<br><b>RA:</b> 2x <0.126                                                                                                                 | Extrapolation to the whole group of root and tuber vegetables (except sugarbeet) possible with 4 trials on carrot (per zone) + 4 trials on potatoes (per zone).<br><u>Data gap:</u> 2 NEU + 2 SEU trials in carrots and 2 NEU + 2 SEU trials in potatoes are still required. | -                      | Mo: 0.05<br>RA: 0.126 <sup>#</sup> | Mo: 0.05<br>RA: 0.126 <sup>#</sup> |                   |
|                                                                  | SEU                      | <b>Mo:</b> 2x <0.05<br><b>RA:</b> 2x <0.126                                                                                                                 |                                                                                                                                                                                                                                                                              | -                      | Mo: 0.05<br>RA: 0.126 <sup>#</sup> | Mo: 0.05<br>RA: 0.126 <sup>#</sup> |                   |
| Carrot                                                           | NEU                      | <b>Mo:</b> 2x <0.05<br><b>RA:</b> 2x <0.126                                                                                                                 |                                                                                                                                                                                                                                                                              | -                      | Mo: 0.05<br>RA: 0.126 <sup>#</sup> | Mo: 0.05<br>RA: 0.126 <sup>#</sup> |                   |

| Commodity  | Region/<br>Indoor<br>(a) | Residue levels observed in the supervised residue trials (mg/kg)<br><b>Mo:</b> Glyphosate<br><b>RA:</b> Sum of glyphosate and AMPA, expressed as glyphosate | Comments/Source                                                                                                                                                                                                                                                                                                                               | Calculated MRL (mg/kg) | HR <sup>(b)</sup> (mg/kg)          | STMR <sup>(c)</sup> (mg/kg)        | CF <sup>(d)</sup> |
|------------|--------------------------|-------------------------------------------------------------------------------------------------------------------------------------------------------------|-----------------------------------------------------------------------------------------------------------------------------------------------------------------------------------------------------------------------------------------------------------------------------------------------------------------------------------------------|------------------------|------------------------------------|------------------------------------|-------------------|
|            | SEU                      | <b>Mo:</b> 2x <0.05<br><b>RA:</b> 2x <0.126                                                                                                                 |                                                                                                                                                                                                                                                                                                                                               | -                      | Mo: 0.05<br>RA: 0.126 <sup>#</sup> | Mo: 0.05<br>RA: 0.126 <sup>#</sup> |                   |
| Onion bulb | NEU                      | <b>Mo:</b> 2x <0.05<br><b>RA:</b> 2x <0.126                                                                                                                 | Extrapolation to the whole group of bulb vegetables not possible.<br><br>Extrapolation from bulb onion to garlic and shallots possible. Bulb onion is a major crop in NEU and SEU.<br><u>Data gap:</u> 2 NEU + 2 SEU trials in bulb onions are still required.                                                                                | -                      | Mo: 0.05<br>RA: 0.126 <sup>#</sup> | Mo: 0.05<br>RA: 0.126 <sup>#</sup> |                   |
|            | SEU                      | <b>Mo:</b> 2x <0.05<br><b>RA:</b> 2x <0.126                                                                                                                 | No data available in support of spring onions (minor crop).<br><u>Data gap:</u> see data gap on leek (2 NEU + 1 SEU trials on leek (for data extrapolation) are still required in support of spring onion).<br>For bulb vegetables other than onion and spring onion, at least 3 NEU and 3 SEU additional trials for each are still required. | -                      | Mo: 0.05<br>RA: 0.126 <sup>#</sup> | Mo: 0.05<br>RA: 0.126 <sup>#</sup> |                   |
| Tomato     | NEU                      | <b>Mo:</b> 2x <0.05<br><b>RA:</b> 2x <0.126                                                                                                                 |                                                                                                                                                                                                                                                                                                                                               | -                      | Mo: 0.05<br>RA: 0.126 <sup>#</sup> | Mo: 0.05<br>RA: 0.126 <sup>#</sup> |                   |

| <b>Commodity</b> | <b>Region/<br/>Indoor</b><br>(a) | <b>Residue levels observed in the supervised residue trials</b><br>(mg/kg)<br><b>Mo:</b> Glyphosate<br><b>RA:</b> Sum of glyphosate and AMPA, expressed as glyphosate | <b>Comments/Source</b>                                                                                                                                                                                                                                                                                                                                 | <b>Calculated MRL</b><br>(mg/kg) | <b>HR</b> (b)<br>(mg/kg)           | <b>STMR</b> (c)<br>(mg/kg)         | <b>CF</b><br>(d) |
|------------------|----------------------------------|-----------------------------------------------------------------------------------------------------------------------------------------------------------------------|--------------------------------------------------------------------------------------------------------------------------------------------------------------------------------------------------------------------------------------------------------------------------------------------------------------------------------------------------------|----------------------------------|------------------------------------|------------------------------------|------------------|
| Cucumber         | SEU                              | <b>Mo:</b> <0.05<br><b>RA:</b> <0.126                                                                                                                                 | Extrapolation to the whole group of fruiting vegetables possible with 4 trials on tomatoes (per zone) + 4 trials on cucumbers (per zone). Trials on courgettes are considered an adequate surrogate for trials on cucumbers.<br><u>Data gap:</u> 2 NEU + 4 SEU trials in tomatoes and 3 NEU + 2 SEU trial in cucumber or courgette are still required. | -                                | Mo: 0.05<br>RA: 0.126 <sup>#</sup> | Mo: 0.05<br>RA: 0.126 <sup>#</sup> |                  |
| Courgette        | NEU                              | <b>Mo:</b> <0.05<br><b>RA:</b> <0.126                                                                                                                                 |                                                                                                                                                                                                                                                                                                                                                        | -                                | Mo: 0.05<br>RA: 0.126 <sup>#</sup> | Mo: 0.05<br>RA: 0.126 <sup>#</sup> |                  |
| Courgette        | SEU                              | <b>Mo:</b> <0.05<br><b>RA:</b> <0.126                                                                                                                                 |                                                                                                                                                                                                                                                                                                                                                        | -                                | Mo: 0.05<br>RA: 0.126 <sup>#</sup> | Mo: 0.05<br>RA: 0.126 <sup>#</sup> |                  |
| Cauliflower      | NEU                              | <b>Mo:</b> 2x <0.05<br><b>RA:</b> 2x <0.126                                                                                                                           |                                                                                                                                                                                                                                                                                                                                                        | -                                | Mo: 0.05<br>RA: 0.126 <sup>#</sup> | Mo: 0.05<br>RA: 0.126 <sup>#</sup> |                  |
|                  | SEU                              | <b>Mo:</b> 2x <0.05<br><b>RA:</b> <0.126                                                                                                                              |                                                                                                                                                                                                                                                                                                                                                        | -                                | Mo: 0.05<br>RA: 0.126 <sup>#</sup> | Mo: 0.05<br>RA: 0.126 <sup>#</sup> |                  |
| Cabbage head     | NEU                              | <b>Mo:</b> 2x <0.05<br><b>RA:</b> 2x <0.126                                                                                                                           |                                                                                                                                                                                                                                                                                                                                                        | -                                | Mo: 0.05<br>RA: 0.126 <sup>#</sup> | Mo: 0.05<br>RA: 0.126 <sup>#</sup> |                  |

| Commodity       | Region/<br>Indoor<br>(a) | Residue levels observed in the supervised residue trials (mg/kg)<br>Mo: Glyphosate<br>RA: Sum of glyphosate and AMPA, expressed as glyphosate | Comments/Source                                                                                                                                                                                                                                                                                                                                                                                                                                                                                                                                                                                                                                                                                                                       | Calculated MRL (mg/kg) | HR <sup>(b)</sup> (mg/kg)          | STMR <sup>(c)</sup> (mg/kg)        | CF <sup>(d)</sup> |
|-----------------|--------------------------|-----------------------------------------------------------------------------------------------------------------------------------------------|---------------------------------------------------------------------------------------------------------------------------------------------------------------------------------------------------------------------------------------------------------------------------------------------------------------------------------------------------------------------------------------------------------------------------------------------------------------------------------------------------------------------------------------------------------------------------------------------------------------------------------------------------------------------------------------------------------------------------------------|------------------------|------------------------------------|------------------------------------|-------------------|
|                 | SEU                      | Mo: 2x <0.05<br>RA: 2x <0.126                                                                                                                 | <p>Extrapolation to the whole subgroups of (b) head brassica and (a) flowering brassica possible with 4 trials on head cabbage (per zone) + 4 trials on cauliflower/broccoli (per zone).</p> <p><u>Data gap</u>: 2 NEU + 2 SEU trials in head cabbage and 2 NEU + 3 SEU trials in cauliflower or broccoli are still required.</p> <p>No data for subgroup (c) leafy brassica (minor crops) or (d) kohlrabies (minor crop) available.</p> <p><u>Data gap</u>: 3 NEU + 3 SEU trials in leafy brassica (kale) and 3 NEU + 3 SEU trials in kohlrabies are still required.</p> <p>In support of leafy brassica, pre-emergence trials in lettuce are also acceptable for extrapolation (data on pre-emergence lettuce are shown below).</p> | -                      | Mo: 0.05<br>RA: 0.126 <sup>#</sup> | Mo: 0.05<br>RA: 0.126 <sup>#</sup> |                   |
| Lettuce, leaves | NEU                      | Mo: 2x <0.05<br>RA: 2x <0.126                                                                                                                 |                                                                                                                                                                                                                                                                                                                                                                                                                                                                                                                                                                                                                                                                                                                                       | -                      | Mo: 0.05<br>RA: 0.126 <sup>#</sup> | Mo: 0.05<br>RA: 0.126 <sup>#</sup> |                   |

| Commodity     | Region/<br>Indoor<br>(a) | Residue levels observed in the supervised residue trials (mg/kg)<br><b>Mo:</b> Glyphosate<br><b>RA:</b> Sum of glyphosate and AMPA, expressed as glyphosate | Comments/Source                                                                                                                                                                                                                                                                                                                                                                                                                                                                                                                                                                                                                                                                                                                                                                                                                                                                                                                                                | Calculated MRL (mg/kg) | HR <sup>(b)</sup> (mg/kg)          | STMR <sup>(c)</sup> (mg/kg)        | CF <sup>(d)</sup> |
|---------------|--------------------------|-------------------------------------------------------------------------------------------------------------------------------------------------------------|----------------------------------------------------------------------------------------------------------------------------------------------------------------------------------------------------------------------------------------------------------------------------------------------------------------------------------------------------------------------------------------------------------------------------------------------------------------------------------------------------------------------------------------------------------------------------------------------------------------------------------------------------------------------------------------------------------------------------------------------------------------------------------------------------------------------------------------------------------------------------------------------------------------------------------------------------------------|------------------------|------------------------------------|------------------------------------|-------------------|
| Lettuce, head | SEU                      | <b>Mo:</b> 2x <0.05<br><b>RA:</b> 2x <0.126                                                                                                                 | <p>Extrapolation to whole subgroup of (a) lettuce and salad plants (pre-emergence) and (b) spinaches and similar leaves (pre-emergence) possible from trials on lettuce (pre-emergence). Note that open and closed leaf varieties can be used for extrapolation when it comes to pre-emergence uses.<br/><u>Data gap:</u> 2 NEU + 2 SEU trials in lettuce (pre-emergence) still required.</p> <p>No data for subgroup (c) vine leaves and similar species (minor crops) available.<br/><u>Data gap:</u> 3 NEU + 3 SEU trials in vine leaves are still required.</p> <p>No data for subgroup (e) witloof (minor crop) available.<br/><u>Data gap:</u> 3 NEU + 3 SEU trials in witloof are still required.</p> <p>Extrapolation to whole subgroup (d) watercresses (minor crop) and (f) herbs and edible flowers (minor crops) possible with trials on open leaf lettuce.<br/><u>Data gap:</u> 1 NEU + 3 SEU trials are still required on open leaf lettuce.</p> | -                      | Mo: 0.05<br>RA: 0.126 <sup>#</sup> | Mo: 0.05<br>RA: 0.126 <sup>#</sup> |                   |

| <b>Commodity</b>                   | <b>Region/<br/>Indoor</b><br>(a) | <b>Residue levels observed in the supervised residue trials</b><br>(mg/kg)<br><b>Mo:</b> Glyphosate<br><b>RA:</b> Sum of glyphosate and AMPA, expressed as glyphosate | <b>Comments/Source</b>                                                                                                                                                                                                                                                                                                                                  | <b>Calculated MRL</b><br>(mg/kg) | <b>HR</b> (b)<br>(mg/kg)           | <b>STMR</b> (c)<br>(mg/kg)         | <b>CF</b><br>(d) |
|------------------------------------|----------------------------------|-----------------------------------------------------------------------------------------------------------------------------------------------------------------------|---------------------------------------------------------------------------------------------------------------------------------------------------------------------------------------------------------------------------------------------------------------------------------------------------------------------------------------------------------|----------------------------------|------------------------------------|------------------------------------|------------------|
| Leek                               | NEU                              | <b>Mo:</b> 2x <0.05<br><b>RA:</b> 2x <0.126                                                                                                                           | No extrapolations from leek to other stem vegetables possible. Leek is a major crop in NEU and a minor crop in SEU.<br><br><u>Data gap:</u> 2 NEU + 1 SEU trials are still required in support of a use in leek (possible extrapolation to spring onions).<br>For other stem vegetables, 3 NEU and 3 SEU additional trials for each are still required. | -                                | Mo: 0.05<br>RA: 0.126 <sup>#</sup> | Mo: 0.05<br>RA: 0.126 <sup>#</sup> |                  |
|                                    | SEU                              | <b>Mo:</b> 2x <0.05<br><b>RA:</b> 2x <0.126                                                                                                                           |                                                                                                                                                                                                                                                                                                                                                         | -                                | Mo: 0.05<br>RA: 0.126 <sup>#</sup> | Mo: 0.05<br>RA: 0.126 <sup>#</sup> |                  |
| Sugar beet, roots                  | SEU                              | <b>Mo:</b> 2x <0.05<br><b>RA:</b> 2x <0.126                                                                                                                           | No extrapolations from other plants to sugar beet possible. Sugar beet is a major crop in NEU and SEU.                                                                                                                                                                                                                                                  | -                                | Mo: 0.05<br>RA: 0.126 <sup>#</sup> | Mo: 0.05<br>RA: 0.126 <sup>#</sup> |                  |
| Sugar beet, tops/leaves (for feed) | SEU                              | <b>Mo:</b> 2x <0.05<br><b>RA:</b> 2x <0.126                                                                                                                           | <u>Data gap:</u> 4 NEU trials + 2 SEU trials are still required.                                                                                                                                                                                                                                                                                        | -                                | Mo: 0.05<br>RA: 0.126 <sup>#</sup> | Mo: 0.05<br>RA: 0.126 <sup>#</sup> |                  |
| <b>Inter – row use</b>             |                                  |                                                                                                                                                                       |                                                                                                                                                                                                                                                                                                                                                         |                                  |                                    |                                    |                  |
| Carrot                             | SEU                              | <b>Mo:</b> 4x <0.05<br><b>RA:</b> 4x <0.126                                                                                                                           | Extrapolation to the whole group of root and tuber vegetables possible with 4 trials on carrot (per zone) + 4 trials on potatoes (per zone).<br><u>Data gap:</u> 4 NEU trials in carrots and 4 NEU + 4 SEU trials in potatoes are still required.                                                                                                       | -                                | Mo: 0.05<br>RA: 0.126              | Mo: 0.05<br>RA: 0.126              |                  |
| Radish, roots                      | SEU                              | <b>Mo:</b> 2x <0.05<br><b>RA:</b> 2x <0.126                                                                                                                           |                                                                                                                                                                                                                                                                                                                                                         | -                                | Mo: 0.05<br>RA: 0.126 <sup>#</sup> | Mo: 0.05<br>RA: 0.126 <sup>#</sup> |                  |
| Radish, tops/leaves                | SEU                              | <b>Mo:</b> 2x <0.05<br><b>RA:</b> 2x <0.126                                                                                                                           |                                                                                                                                                                                                                                                                                                                                                         | -                                | Mo: 0.05<br>RA: 0.126 <sup>#</sup> | Mo: 0.05<br>RA: 0.126 <sup>#</sup> |                  |

| <b>Commodity</b> | <b>Region/<br/>Indoor</b><br>(a) | <b>Residue levels observed in the supervised residue trials</b><br>(mg/kg)<br><b>Mo:</b> Glyphosate<br><b>RA:</b> Sum of glyphosate and AMPA, expressed as glyphosate | <b>Comments/Source</b>                                                                                                                                                                                                                                                                                   | <b>Calculated MRL</b><br>(mg/kg) | <b>HR</b> (b)<br>(mg/kg)           | <b>STMR</b> (c)<br>(mg/kg)         | <b>CF</b><br>(d) |
|------------------|----------------------------------|-----------------------------------------------------------------------------------------------------------------------------------------------------------------------|----------------------------------------------------------------------------------------------------------------------------------------------------------------------------------------------------------------------------------------------------------------------------------------------------------|----------------------------------|------------------------------------|------------------------------------|------------------|
| Onion, bulb      | NEU                              | <b>Mo:</b> 2x <0.05<br><b>RA:</b> 2x <0.126                                                                                                                           | Extrapolation to the whole group of bulb vegetable not possible.                                                                                                                                                                                                                                         | -                                | Mo: 0.05<br>RA: 0.126 <sup>#</sup> | Mo: 0.05<br>RA: 0.126 <sup>#</sup> |                  |
|                  | SEU                              | <b>Mo:</b> 4x <0.05<br><b>RA:</b> 3x <0.126                                                                                                                           | Extrapolation from bulb onion to garlic and shallots possible. Bulb onion is a major crop in NEU and SEU.<br><u>Data gap:</u> 2 NEU + 1 SEU trials in bulb onions are still required.<br><br>For other bulb vegetables (other than onion) 3 NEU and 3 SEU additional trials for each are still required. | -                                | Mo: 0.05<br>RA: 0.126 <sup>#</sup> | Mo: 0.05<br>RA: 0.126 <sup>#</sup> |                  |
| Tomato           | SEU                              | <b>Mo:</b> 4x <0.05<br><b>RA:</b> 4x <0.126                                                                                                                           | Extrapolation to the whole group of fruiting vegetables possible with 4 trials on tomatoes (per zone) + 4 trials on cucumbers (per zone). Trials on courgettes are considered an adequate surrogate for trials on cucumbers.                                                                             | -                                | Mo: 0.05<br>RA: 0.126              | Mo: 0.05<br>RA: 0.126              |                  |
| Cucumber         | NEU                              | <b>Mo:</b> 2x <0.05<br><b>RA:</b> 2x <0.126                                                                                                                           | <u>Data gap:</u> 4 NEU trials in tomatoes and 1 NEU trial in cucumber or courgette are still required.                                                                                                                                                                                                   | -                                | Mo: 0.05<br>RA: 0.126 <sup>#</sup> | Mo: 0.05<br>RA: 0.126 <sup>#</sup> |                  |
|                  | SEU                              | <b>Mo:</b> 2x <0.05<br><b>RA:</b> 2x <0.126                                                                                                                           |                                                                                                                                                                                                                                                                                                          | -                                | Mo: 0.05<br>RA: 0.126 <sup>#</sup> | Mo: 0.05<br>RA: 0.126 <sup>#</sup> |                  |
| Courgette        | NEU                              | <b>Mo:</b> <0.05<br><b>RA:</b> <0.126                                                                                                                                 |                                                                                                                                                                                                                                                                                                          | -                                | Mo: 0.05<br>RA: 0.126 <sup>#</sup> | Mo: 0.05<br>RA: 0.126 <sup>#</sup> |                  |

| Commodity               | Region/<br>Indoor<br>(a) | Residue levels observed in the supervised residue trials (mg/kg)<br>Mo: Glyphosate<br>RA: Sum of glyphosate and AMPA, expressed as glyphosate | Comments/Source                                                                                                                                                                                                                                                                        | Calculated MRL (mg/kg) | HR <sup>(b)</sup> (mg/kg)          | STMR <sup>(c)</sup> (mg/kg)        | CF <sup>(d)</sup> |
|-------------------------|--------------------------|-----------------------------------------------------------------------------------------------------------------------------------------------|----------------------------------------------------------------------------------------------------------------------------------------------------------------------------------------------------------------------------------------------------------------------------------------|------------------------|------------------------------------|------------------------------------|-------------------|
|                         | SEU                      | Mo: 2x <0.05<br>RA: 2x <0.126                                                                                                                 |                                                                                                                                                                                                                                                                                        | -                      | Mo: 0.05<br>RA: 0.126 <sup>#</sup> | Mo: 0.05<br>RA: 0.126 <sup>#</sup> |                   |
| Lettuce, head           | NEU                      | Mo: 2x <0.05<br>RA: 2x <0.126                                                                                                                 | Extrapolation to the: whole subgroup (a) lettuces and salad plants, (b) spinaches and similar leaves, (d) watercresses, (f) herbs and edible flowers possible from 4 NEU + 4 SEU trials on open leaf lettuce.<br><u>Data gap</u> : 4 NEU + 4 SEU trials in open leaf lettuce required. | -                      | Mo: 0.05<br>RA: 0.126 <sup>#</sup> | Mo: 0.05<br>RA: 0.126 <sup>#</sup> |                   |
|                         | SEU                      | Mo: 4x <0.05<br>RA: 4x <0.126                                                                                                                 |                                                                                                                                                                                                                                                                                        | -                      | Mo: 0.05<br>RA: 0.126              | Mo: 0.05<br>RA: 0.126              |                   |
| Parsley, leaves         | NEU                      | Mo: 2x <0.05<br>RA: 2x <0.126                                                                                                                 | (e) witloof and (c) vine leaves are part of leafy vegetables group and no extrapolation possible from open leaf lettuce or other crops.<br><u>Data gap</u> : 3 NEU + 3 SEU trials for witloof and 3 NEU + 3 SEU trials for vine leaves are required.                                   | -                      | Mo: 0.05<br>RA: 0.126 <sup>#</sup> | Mo: 0.05<br>RA: 0.126 <sup>#</sup> |                   |
|                         | SEU                      | Mo: 2x <0.05<br>RA: 2x <0.126                                                                                                                 |                                                                                                                                                                                                                                                                                        | -                      | Mo: 0.05<br>RA: 0.126 <sup>#</sup> | Mo: 0.05<br>RA: 0.126 <sup>#</sup> |                   |
| Green beans, whole pods | NEU                      | Mo: 4x <0.05<br>RA: 4x <0.126                                                                                                                 | Extrapolation to the whole group Legume vegetables (fresh) possible from 4 NEU and 4 SEU trials on beans (with pods).<br><u>Data gap</u> : 1 SEU trial in beans (with pods) is still required.                                                                                         | -                      | Mo: 0.05<br>RA: 0.126              | Mo: 0.05<br>RA: 0.126              |                   |
|                         | SEU                      | Mo: 3x <0.05<br>RA: 3x <0.126                                                                                                                 |                                                                                                                                                                                                                                                                                        | -                      | Mo: 0.05<br>RA: 0.126 <sup>#</sup> | Mo: 0.05<br>RA: 0.126 <sup>#</sup> |                   |



| Commodity                                                                                                               | Region/<br>Indoor<br>(a) | Residue levels observed in the supervised residue trials (mg/kg)<br>Mo: Glyphosate<br>RA: Sum of glyphosate and AMPA, expressed as glyphosate | Comments/Source                                                                                                                                                    | Calculated MRL (mg/kg) | HR <sup>(b)</sup> (mg/kg) | STMR <sup>(c)</sup> (mg/kg) | CF <sup>(d)</sup> |
|-------------------------------------------------------------------------------------------------------------------------|--------------------------|-----------------------------------------------------------------------------------------------------------------------------------------------|--------------------------------------------------------------------------------------------------------------------------------------------------------------------|------------------------|---------------------------|-----------------------------|-------------------|
| <b>Summary of data on residues in pollen and bee products (Regulation (EU) No 283/2013, Annex Part A, point 6.10.1)</b> |                          |                                                                                                                                               |                                                                                                                                                                    |                        |                           |                             |                   |
| Honey                                                                                                                   | NEU                      | Mo: 0.87, 3.2, 4.5, 6.9<br>RA: 0.91, 3.2, 4.5, 6.9                                                                                            | <b>The existing MRL is expected to be exceeded based on residue levels from field trials. The available data, however, are sufficient to propose a higher MRL.</b> | <b>15</b>              | Mo: 6.9<br>RA: 6.9        | Mo: 3.9<br>RA: 3.9          | 1                 |

Mo: residue levels expressed according to the enforcement residue definition; RA: residue levels expressed according to risk assessment residue definition.

# although the residue dataset was incomplete the inputs values HR/ STMRs were used for the indicative dietary risk assessment

(a): NEU: Outdoor trials conducted in northern Europe, SEU: Outdoor trials conducted in southern Europe, Indoor: indoor EU trials or Country code: if non-EU trials.

(b): Highest residue. The highest residue for risk assessment (RA) refers to the whole commodity and not to the edible portion.

(c): Supervised trials median residue. The median residue for risk assessment (RA) refers to the whole commodity and not to the edible portion.

(d): Conversion factor to recalculate residues according to the residue definition for monitoring to the residue definition for risk assessment. The CF is provisional for those commodities for which data gaps are set. It is noted that is currently amounting to 2.5 based on the LOQs for glyphosate and AMPA using a molecular weight correction of 1.5.

## Residues in rotational crops

### Overall summary

|                                                                                               |     |                                                                                                                                                                                                                                                                                                                         |
|-----------------------------------------------------------------------------------------------|-----|-------------------------------------------------------------------------------------------------------------------------------------------------------------------------------------------------------------------------------------------------------------------------------------------------------------------------|
| Residues in rotational and succeeding crops expected based on confined rotational crop study? | Yes |                                                                                                                                                                                                                                                                                                                         |
| Residues in rotational and succeeding crops expected based on field rotational crop study?    | Yes | No residues of glyphosate expected in plants due to crop rotation.<br><br>Residues of AMPA above the LOQ (0.025 mg/kg) cannot be excluded based on the available data at the anticipated PEC plateau levels in the super crop groups 'leaf vegetables, herbs and edible flowers' and cereals (grain, forage, straw). No |

|  |                                                                                                                                                                                                                                                                                                                                                                                       |
|--|---------------------------------------------------------------------------------------------------------------------------------------------------------------------------------------------------------------------------------------------------------------------------------------------------------------------------------------------------------------------------------------|
|  | <p>AMPA residues above the LOQ expected in root/tuber vegetables.</p> <p><b>Data gap:</b> Final report of the magnitude of the residues in rotational crops study in carrot, lettuce, wheat</p> <p><b>Data gap</b> for sufficient studies investigating the magnitude of residues in rotational crops (i.e. carrot, lettuce, wheat) including in additional crops as appropriate.</p> |
|--|---------------------------------------------------------------------------------------------------------------------------------------------------------------------------------------------------------------------------------------------------------------------------------------------------------------------------------------------------------------------------------------|

**Summary of residues data from the rotational crops residue trials (if relevant, e.g. MRL, STMR, HR derived from rotational crops)**

| Commodity | Region/<br>Indoor<br>(a) | PBI<br>(days)<br>(b) | Residue levels observed in the supervised<br>residue trials (expressed as glyphosate)<br>(mg/kg) |                                       | Comments/Source                                               | Calculated<br>MRL<br>(mg/kg) | HR <sup>(c)</sup><br>(mg/kg) | STMR <sup>(d)</sup><br>(mg/kg) | CF <sup>(e)</sup> |  |  |       |       |   |
|-----------|--------------------------|----------------------|--------------------------------------------------------------------------------------------------|---------------------------------------|---------------------------------------------------------------|------------------------------|------------------------------|--------------------------------|-------------------|--|--|-------|-------|---|
|           |                          |                      | Glyphosate <sup>(f)</sup>                                                                        | AMPA <sup>(g)</sup>                   |                                                               |                              |                              |                                |                   |  |  |       |       |   |
| Carrot    | Outdoor                  | 27 ± 2<br>days       | Leaves: 2x <0.025<br>Roots: 2x <0.025                                                            | Leaves: 2x <0.038<br>Roots: 2x <0.038 | Data set<br>too limited<br>for a robust<br>MRL<br>calculation |                              | <0.025                       | <0.025                         | -                 |  |  |       |       |   |
|           |                          | 135 ±<br>10 days     | Leaves: 2x <0.025<br>Roots: 2x <0.025                                                            | Leaves: 2x <0.038<br>Roots: 2x <0.038 |                                                               |                              |                              |                                |                   |  |  |       |       |   |
| Lettuce   | Outdoor                  | 27 ± 2<br>days       | Unscaled residues<br><0.025, 0.028                                                               | <0.038, 0.074                         |                                                               |                              |                              |                                |                   |  |  | 0.099 | 0.081 | - |
|           |                          | 135 ±<br>10 days     | Scaled residues<br>2x <0.025                                                                     | <0.038, 0.073                         |                                                               |                              |                              |                                |                   |  |  |       |       |   |

| Commodity | Region/<br>Indoor<br>(a) | PBI<br>(days)<br>(b) | Residue levels observed in the supervised<br>residue trials (expressed as glyphosate)<br>(mg/kg)                                  |                                                                                                                                        | Comments/Source | Calculated<br>MRL<br>(mg/kg) | HR <sup>(c)</sup><br>(mg/kg)                                                                                                       | STMR <sup>(d)</sup><br>(mg/kg)                                                                                                     | CF <sup>(e)</sup> |
|-----------|--------------------------|----------------------|-----------------------------------------------------------------------------------------------------------------------------------|----------------------------------------------------------------------------------------------------------------------------------------|-----------------|------------------------------|------------------------------------------------------------------------------------------------------------------------------------|------------------------------------------------------------------------------------------------------------------------------------|-------------------|
|           |                          |                      | Glyphosate <sup>(f)</sup>                                                                                                         | AMPA <sup>(g)</sup>                                                                                                                    |                 |                              |                                                                                                                                    |                                                                                                                                    |                   |
| Wheat     | Outdoor                  | 27 ± 2<br>days       | Green material<br>(BBCH 30-31): 2x<br><0.025<br>Green material<br>(BBCH 75): 2x<br><0.025<br>Grain: 2x <0.025<br>Straw: 2x <0.025 | Green material (BBCH<br>30-31): <0.038, 0.059<br>Green material (BBCH<br>75): <0.038, 0.058<br>Grain: <0.038, 0.27<br>Straw: 2x <0.038 |                 |                              | Green<br>material<br>(BBCH<br>30-31):<br>0.084<br>Green<br>material<br>(BBCH<br>75):<br>0.083<br>Grain:<br>0.30<br>Straw:<br>0.063 | Green<br>material<br>(BBCH<br>30-31):<br>0.074<br>Green<br>material<br>(BBCH<br>75):<br>0.073<br>Grain:<br>0.18<br>Straw:<br>0.063 | -                 |
|           |                          | 135 ±<br>10 days     |                                                                                                                                   |                                                                                                                                        |                 |                              |                                                                                                                                    |                                                                                                                                    |                   |

| Commodity | Region/<br>Indoor<br>(a) | PBI<br>(days)<br>(b) | Residue levels observed in the supervised<br>residue trials (expressed as glyphosate)<br>(mg/kg)          |                                                                                                          | Comments/Source                                                                                                                                                                                                                                                                                                                                                                                                                                                                               | Calculated<br>MRL<br>(mg/kg) | HR <sup>(c)</sup><br>(mg/kg)                                                                          | STMR <sup>(d)</sup><br>(mg/kg)                                                                        | CF <sup>(e)</sup> |
|-----------|--------------------------|----------------------|-----------------------------------------------------------------------------------------------------------|----------------------------------------------------------------------------------------------------------|-----------------------------------------------------------------------------------------------------------------------------------------------------------------------------------------------------------------------------------------------------------------------------------------------------------------------------------------------------------------------------------------------------------------------------------------------------------------------------------------------|------------------------------|-------------------------------------------------------------------------------------------------------|-------------------------------------------------------------------------------------------------------|-------------------|
|           |                          |                      | Glyphosate <sup>(f)</sup>                                                                                 | AMPA <sup>(g)</sup>                                                                                      |                                                                                                                                                                                                                                                                                                                                                                                                                                                                                               |                              |                                                                                                       |                                                                                                       |                   |
|           |                          |                      | Green material (BBCH 30-31): <0.025<br>Green material (BBCH 75): <0.025<br>Grain: <0.025<br>Straw: <0.025 | Green material (BBCH 30-31): <0.038<br>Green material (BBCH 75): <0.038<br>Grain: 0.046<br>Straw: <0.038 | Two independent field trials (one in NEU, one in SEU). Results based on an interim study only. No data available for the third PBI and incomplete data available for the second PBI for wheat.<br><br>Study slightly overdosed (1.4-1.5N) with regard to glyphosate compared to the anticipated plateau concentrations. Study adequately dosed with regard to AMPA.<br><br>Available data are nevertheless not sufficient to conduct a robust risk assessment ( <b>data gaps</b> : see above) |                              | Green material (BBCH 30-31): 0.063<br>Green material (BBCH 75): 0.063<br>Grain: 0.071<br>Straw: 0.063 | Green material (BBCH 30-31): 0.063<br>Green material (BBCH 75): 0.063<br>Grain: 0.071<br>Straw: 0.063 | -                 |

\* Indicates that the MRL is proposed at the limit of quantification.

Mo: residue levels expressed according to the monitoring residue definition; RA: residue levels expressed according to risk assessment residue definition.

(a): NEU: Outdoor trials conducted in northern Europe, SEU: Outdoor trials conducted in southern Europe, Country code: if non-EU trials.

(b): Plant-back interval: The interval (days, months, years) between the final application of a pesticide product to a primary crop and the planting of a rotational crop.

(c): Highest residue. The highest residue for risk assessment (RA) refers to the whole commodity and not to the edible portion.

(d): Supervised trials median residue. The median residue for risk assessment (RA) refers to the whole commodity and not to the edible portion.

(e): Conversion factor to recalculate residues according to the residue definition for monitoring to the residue definition for risk assessment.

(f): A scaling factor is applied to the residues of glyphosate > LOQ to take into account the exaggerated application rate of 1.5 N in the study.

(g): Residues of AMPA are corrected for the molecular weight and expressed as glyphosate. No scaling factor is applied to the residues of AMPA as the study was performed at 1 N with respect to estimated soil concentration.

**Processing factors**

| Processed commodity      | Number of valid studies <sup>(a)</sup> | Processing Factor (PF)                                                      |           | CF <sub>P</sub> <sup>(b)</sup> | Comment/ Source                                                                                    |
|--------------------------|----------------------------------------|-----------------------------------------------------------------------------|-----------|--------------------------------|----------------------------------------------------------------------------------------------------|
|                          |                                        | Individual values                                                           | Median PF |                                |                                                                                                    |
| <b><i>Glyphosate</i></b> |                                        |                                                                             |           |                                |                                                                                                    |
| Olive/Raw oil            | 3                                      | <0.03, <0.04, <0.05, <0.05, <0.10, <0.11, <0.12, <0.29, <0.38, <0.42, <0.45 | <0.11     | 1                              | CF determined to be 1 since no residues of AMPA were determined in the RAC or processed commodity. |
| Olive/Refined oil        | 1                                      | <0.05, <0.38, <0.42, <0.45                                                  | <0.40     | 1                              | CF determined to be 1 since no residues of AMPA were determined in the RAC or processed commodity. |
| <b><i>AMPA</i></b>       |                                        |                                                                             |           |                                |                                                                                                    |
| Potato/Chips             | 1                                      | 1.6                                                                         | n.a.      | n.a.                           | PF for AMPA. No median PF or CF calculated since only one single value is available.               |
| Potato/Wet peel (chips)  | 1                                      | <0.45                                                                       | n.a.      | n.a.                           |                                                                                                    |
| Potato/Flakes            | 1                                      | 1.4                                                                         | n.a.      | n.a.                           |                                                                                                    |
| Potato/Wet peel (flakes) | 1                                      | <0.47                                                                       | n.a.      | n.a.                           |                                                                                                    |
| Potato/Dry peel (flakes) | 1                                      | 1.6                                                                         | n.a.      | n.a.                           |                                                                                                    |
| Granules                 | 1                                      | 1.7                                                                         | n.a.      | n.a.                           |                                                                                                    |

PF: Processing factor (=Residue level in processed commodity expressed according to RD-Mo/ Residue level in raw commodity expressed according to RD-Mo);

CF<sub>P</sub>: Conversion factor for risk assessment in processed commodity (=Residue level in processed commodity expressed according to RD-RA / Residue level in processed commodity expressed according to RD-Mo)

(a): Studies with residues in the RAC at or close to the LOQ were disregarded (unless concentration may occur)

(b): Median of the individual conversion factors for each processing residues trial.

**Residues in livestock<sup>3</sup>**

| Relevant groups      | Dietary burden expressed in |       |          |      | Most critical diet <sup>1</sup> | Most critical commodity <sup>2</sup> |               | Trigger (0.004 mg/kg bw/day) exceeded |
|----------------------|-----------------------------|-------|----------|------|---------------------------------|--------------------------------------|---------------|---------------------------------------|
|                      | mg/kg bw/day                |       | mg/kg DM |      |                                 |                                      |               |                                       |
|                      | Median                      | Max.  | Median   | Max. |                                 |                                      |               |                                       |
| Cattle (all diets)   | 0.047                       | 0.047 | 1.26     | 1.26 | Dairy cattle                    | Wheat                                | milled byppts | Yes                                   |
| Cattle (dairy only)  | 0.047                       | 0.047 | 1.23     | 1.23 | Dairy cattle                    | Wheat                                | milled byppts | Yes                                   |
| Sheep (all diets)    | 0.065                       | 0.065 | 1.53     | 1.53 | Lamb                            | Wheat                                | milled byppts | Yes                                   |
| Sheep (ewe only)     | 0.044                       | 0.044 | 1.33     | 1.33 | Ram/Ewe                         | Wheat                                | milled byppts | Yes                                   |
| Swine (all diets)    | 0.043                       | 0.043 | 1.55     | 1.55 | Swine (finishing)               | Wheat                                | milled byppts | Yes                                   |
| Poultry (all diets)  | 0.057                       | 0.057 | 0.83     | 0.83 | Poultry layer                   | Wheat                                | milled byppts | Yes                                   |
| Poultry (layer only) | 0.057                       | 0.057 | 0.83     | 0.83 | Poultry layer                   | Wheat                                | milled byppts | Yes                                   |

<sup>1</sup> When several diets are relevant (e.g. cattle, sheep and poultry "all diets"), the most critical diet is identified from the maximum dietary burdens expressed as "mg/kg bw per day"

<sup>2</sup> The most critical commodity is the major contributor identified from the maximum dietary burden expressed as "mg/kg bw per day".

<sup>3</sup> For the dietary burden calculation the LOQ of glyphosate was used as input value in case residues of glyphosate and AMPA were both below the LOQ in the RACs, which is the case for all relevant feed items based on primary crop field trials. On the basis of preliminary rotational crop field trials, the sum of residues of glyphosate and AMPA were considered in case of residues above the LOQ for uses which were not proposed in the current peer-review, e.g. cereals and leafy crops.

In principle a second dietary burden calculation considering residues of AMPA only (residue definition for monitoring) would be required. However, given the overdosing of the animal studies a transfer is not likely and hence this calculation was not performed

**Nature of residues and methods of analysis in livestock****Metabolism studies, methods of analysis and residue definitions in livestock**

| Livestock<br>(available studies) | Animal                                                                                                                                                                                     | Dose<br>(mg/kg bw/d)                                                                                                              | Duration<br>(days) | Comment/Source                                                                                                                                                             |
|----------------------------------|--------------------------------------------------------------------------------------------------------------------------------------------------------------------------------------------|-----------------------------------------------------------------------------------------------------------------------------------|--------------------|----------------------------------------------------------------------------------------------------------------------------------------------------------------------------|
|                                  | Poultry (Laying hen)                                                                                                                                                                       | 8.86 glyphosate and 0.98 AMPA<br>7.95 glyphosate and 0.88 AMPA<br>26.78 glyphosate and 2.98 AMPA<br>7.76 glyphosate and 0.86 AMPA | 7                  | 9:1 mixture of <i>N</i> -(phosphono- <sup>13</sup> C/ <sup>14</sup> C-methyl)glycine (glyphosate) and amino- <sup>13</sup> C/ <sup>14</sup> C-methylphosphonic acid (AMPA) |
|                                  |                                                                                                                                                                                            | 5.9                                                                                                                               | 10                 | <i>N</i> -(phosphono- <sup>14</sup> C-methyl)glycine trimesium salt                                                                                                        |
|                                  |                                                                                                                                                                                            | 4.4                                                                                                                               | 7                  | [ <sup>14</sup> C]- <i>N</i> -acetyl glyphosate                                                                                                                            |
|                                  |                                                                                                                                                                                            |                                                                                                                                   |                    |                                                                                                                                                                            |
|                                  | Ruminants<br>(Lactating goat)                                                                                                                                                              | 2.6 glyphosate and 0.29 AMPA                                                                                                      | 5                  | 9:1 mixture of <i>N</i> -(phosphono- <sup>13</sup> C/ <sup>14</sup> C-methyl)glycine (glyphosate) and amino- <sup>13</sup> C/ <sup>14</sup> C-methylphosphonic acid (AMPA) |
|                                  |                                                                                                                                                                                            | 3.9                                                                                                                               | 7                  | <i>N</i> -(phosphono- <sup>14</sup> C-methyl)glycine trimesium salt                                                                                                        |
|                                  |                                                                                                                                                                                            | 8.42                                                                                                                              | 5                  | [ <sup>14</sup> C]- <i>N</i> -acetyl glyphosate                                                                                                                            |
|                                  | Pig                                                                                                                                                                                        | -                                                                                                                                 | -                  | triggered (covered by ruminant and rat metabolism)                                                                                                                         |
|                                  | Fish                                                                                                                                                                                       | -                                                                                                                                 | -                  | Not triggered (glyphosate not fat-soluble)                                                                                                                                 |
|                                  | Feeding <i>N</i> -(phosphono- <sup>14</sup> C-methyl)glycine (glyphosate) to poultry (17.9 mg/kg bw) and ruminants (6.4 and 7.6 mg/kg bw) are available but considered as supportive only. |                                                                                                                                   |                    |                                                                                                                                                                            |

Time needed to reach a plateau concentration in milk and eggs (days)

Milk: 2-4

Plateau levels were reached after 2 to 4 days, depending on the metabolism study under investigation.

|                                                                                            |                                                                                                                                                                                                                                                                                                                                                                                                                                                          |                                                                                                                                                                                                                                                   |
|--------------------------------------------------------------------------------------------|----------------------------------------------------------------------------------------------------------------------------------------------------------------------------------------------------------------------------------------------------------------------------------------------------------------------------------------------------------------------------------------------------------------------------------------------------------|---------------------------------------------------------------------------------------------------------------------------------------------------------------------------------------------------------------------------------------------------|
|                                                                                            | Eggs: 14-21                                                                                                                                                                                                                                                                                                                                                                                                                                              | Plateau levels are based on the feeding studies in poultry since dosing periods in metabolism studies were not long enough.                                                                                                                       |
| Metabolism in rat and ruminant similar                                                     | Yes                                                                                                                                                                                                                                                                                                                                                                                                                                                      |                                                                                                                                                                                                                                                   |
| Can a general residue definition be proposed for animals?                                  | No                                                                                                                                                                                                                                                                                                                                                                                                                                                       | Different residue definitions proposed for animals exposed to conventional crops only (scenario within the scope of this Annex I renewal) or to a mix of conventional and genetically modified crops (scenario for potential future applications) |
| Animal residue definition for monitoring (RD-Mo)                                           | <p><b>Considering also future MRL-setting procedure:</b> sum of glyphosate and <i>N</i>-acetyl glyphosate, expressed as glyphosate.</p> <p>For honey, see residue definition for plants.</p>                                                                                                                                                                                                                                                             |                                                                                                                                                                                                                                                   |
| Animal residue definition for risk assessment (RD-RA)                                      | <p><b>Considering the representative uses only:</b> sum of glyphosate and AMPA, expressed as glyphosate.</p> <p><b>In the context of future MRL-setting procedures:</b> sum of glyphosate, AMPA, <i>N</i>-acetyl glyphosate and <i>N</i>-acetyl AMPA, expressed as glyphosate.</p> <p>It should be noted that the aneugenicity of <i>N</i>-acetyl glyphosate has not been addressed (data gap).</p> <p>For honey, see residue definition for plants.</p> |                                                                                                                                                                                                                                                   |
| Fat soluble residues                                                                       | No                                                                                                                                                                                                                                                                                                                                                                                                                                                       |                                                                                                                                                                                                                                                   |
| Methods of analysis for monitoring of residues (analytical technique, matrix groups, LOQs) | <p>LC-MS/MS</p> <p>LOQ 0.025 mg/kg for glyphosate, AMPA and <i>N</i>-acetyl glyphosate</p>                                                                                                                                                                                                                                                                                                                                                               |                                                                                                                                                                                                                                                   |



**Stability of residues in livestock**

| Animal products<br>(available studies) | Animal   | Commodity                  | T (°C) | Stability period |        | Compounds covered | Comment/<br>Source             |              |
|----------------------------------------|----------|----------------------------|--------|------------------|--------|-------------------|--------------------------------|--------------|
|                                        |          |                            |        | Value            | Unit   |                   |                                |              |
|                                        | Pig      | Fat, muscle, liver, kidney | -20    | 26               | Months | Glyphosate        | (CA 6.1/014)                   |              |
|                                        | Ruminant | Fat, muscle, liver, kidney | -20    | 24               | Months |                   | (CA 6.1/014)                   |              |
|                                        | Ruminant | Milk                       | -29    | 22               | Months |                   | (CA 6.1/015)                   |              |
|                                        | Poultry  | Fat, muscle, liver         | -20    | 25               | Months |                   | (CA 6.1/014)                   |              |
|                                        | Poultry  | Kidney                     | -20    | 13               | Months |                   | (CA 6.1/014)                   |              |
|                                        | Poultry  | Eggs                       | -20    | Max. 14          | Months |                   | (CA 6.1/014)                   |              |
|                                        | Pig      | Muscle, liver, kidney      | -20    | 26               | Months | AMPA              | (CA 6.1/014)                   |              |
|                                        | Pig      | Fat                        | -20    | Max.15           | Months |                   | (CA 6.1/014)                   |              |
|                                        | Ruminant | Fat, muscle, liver, kidney | -20    | 24               | Months |                   | (CA 6.1/014)                   |              |
|                                        | Ruminant | Milk                       | -29    | 22               | Months |                   | (CA 6.1/015)                   |              |
|                                        | Poultry  | Fat, muscle, liver         | -20    | 25               | Months |                   | (CA 6.1/014)                   |              |
|                                        | Poultry  | Kidney                     | -20    | 13               | Months |                   | (CA 6.1/014)                   |              |
|                                        | Poultry  | Eggs                       | -20    | Max. 14          | Months |                   | (CA 6.1/014)                   |              |
|                                        | Poultry  | Liver, fat, muscle         | -20    | 3                | Months |                   | <i>N</i> -acetyl<br>glyphosate | (CA 6.1/018) |
|                                        | Ruminant | Liver, kidney, fat, muscle | -20    | 3                | Months |                   |                                | (CA 6.1/019) |
|                                        | Poultry  | Liver, fat, muscle         | -20    | 3                | Months |                   |                                | (CA 6.1/018) |

|  |              |                            |     |   |        |                       |              |
|--|--------------|----------------------------|-----|---|--------|-----------------------|--------------|
|  | Ruminant     | Liver, kidney, fat, muscle | -20 | 3 | Months | <i>N</i> -acetyl AMPA | (CA 6.1/019) |
|  | Bee products | Honey                      | -18 | 6 | Months | Glyphosate            | CA 6.1/001   |
|  |              |                            | -18 | 6 | Months | AMPA                  |              |

**Magnitude of residues in livestock****Summary of the residue data from livestock feeding studies (dosed with glyphosate and AMPA (9:1))**

| Animal commodity                                                                                         | Residues at the closest feeding level <sup>15</sup> (mg/kg) |         | Estimated value at 1N                     |                                         | MRL proposal (mg/kg) | CF <sup>(c)</sup> |
|----------------------------------------------------------------------------------------------------------|-------------------------------------------------------------|---------|-------------------------------------------|-----------------------------------------|----------------------|-------------------|
|                                                                                                          | Mean                                                        | Highest | STMR <sub>Mo</sub> <sup>(a)</sup> (mg/kg) | HR <sub>Mo</sub> <sup>(b)</sup> (mg/kg) |                      |                   |
| <b>Cattle (all)</b> - Closest feeding level (1.64 mg/kg bw; 54 N rate) <sup>(d)</sup>                    |                                                             |         |                                           |                                         |                      |                   |
| Muscle                                                                                                   | <0.1                                                        | <0.1    | <0.1                                      | <0.1                                    | 0.1*                 | 1                 |
| Fat                                                                                                      | <0.2                                                        | <0.2    | <0.2                                      | <0.2                                    | 0.2*                 | 1                 |
| Liver                                                                                                    | <0.2                                                        | <0.2    | <0.2                                      | <0.2                                    | 0.2*                 | 1                 |
| Kidney                                                                                                   | <0.2                                                        | <0.2    | <0.2                                      | <0.2                                    | 0.2*                 | 1                 |
| <b>Cattle (dairy only)</b> - Closest feeding level (1.64 mg/kg bw; 35 N rate) <sup>(d)</sup>             |                                                             |         |                                           |                                         |                      |                   |
| Milk                                                                                                     | <0.1                                                        | n.a.    | <0.1                                      | <0.1                                    | 0.1*                 | 1                 |
| <b>Sheep (all)</b> <sup>(e)</sup> - Closest feeding level (1.64 mg/kg bw; 25 N rate) <sup>(d)</sup>      |                                                             |         |                                           |                                         |                      |                   |
| Muscle                                                                                                   | <0.1                                                        | <0.1    | <0.1                                      | <0.1                                    | 0.1*                 | 1                 |
| Fat                                                                                                      | <0.2                                                        | <0.2    | <0.2                                      | <0.2                                    | 0.2*                 | 1                 |
| Liver                                                                                                    | <0.2                                                        | <0.2    | <0.2                                      | <0.2                                    | 0.2*                 | 1                 |
| Kidney                                                                                                   | <0.2                                                        | <0.2    | <0.2                                      | <0.2                                    | 0.2*                 | 1                 |
| <b>Sheep (ewe only)</b> <sup>(e)</sup> - Closest feeding level (1.64 mg/kg bw; 37 N rate) <sup>(d)</sup> |                                                             |         |                                           |                                         |                      |                   |
| Milk                                                                                                     | <0.1                                                        | n.a.    | <0.1                                      | <0.1                                    | 0.1*                 | 1                 |
| <b>Swine (all)</b> <sup>(e)</sup> - Closest feeding level (1.15 mg/kg bw; 27N rate) <sup>(d)</sup>       |                                                             |         |                                           |                                         |                      |                   |
| Muscle                                                                                                   | <0.1                                                        | <0.1    | <0.1                                      | <0.1                                    | 0.1*                 | 1                 |
| Fat                                                                                                      | <0.2                                                        | <0.2    | <0.2                                      | <0.2                                    | 0.2*                 | 1                 |
| Liver                                                                                                    | <0.2                                                        | <0.2    | <0.2                                      | <0.2                                    | 0.2*                 | 1                 |
| kidney                                                                                                   | <0.2                                                        | <0.2    | <0.2                                      | <0.2                                    | 0.2*                 | 1                 |
| <b>Poultry (all)</b> - Closest feeding level (2.7 mg/kg bw; 51 N rate) <sup>(d)</sup>                    |                                                             |         |                                           |                                         |                      |                   |
| Muscle                                                                                                   | <0.1                                                        | <0.1    | <0.1                                      | <0.1                                    | 0.1*                 | 1                 |
| Fat                                                                                                      | <0.2                                                        | <0.2    | <0.2                                      | <0.2                                    | 0.2*                 | 1                 |
| Liver                                                                                                    | <0.2                                                        | <0.2    | <0.2                                      | <0.2                                    | 0.2*                 | 1                 |
| <b>Poultry (layer only)</b> - Closest feeding level (2.7 mg/kg bw; 49 N rate) <sup>(d)</sup>             |                                                             |         |                                           |                                         |                      |                   |
| Eggs                                                                                                     | <0.1                                                        | <0.1    | <0.1                                      | <0.1                                    | 0.1*                 | 1                 |

\* Indicates that the MRL is proposed at the limit of quantification.

Note RMS: Proposed MRLs (at LOQ) are in line with the conclusions in Article 12 MRL Review (EFSA 2019) where the combined LOQs of 0.1 and 0.2 mg/kg were reported in animal commodities.

n.a.: not applicable

n.r. : not reported

<sup>15</sup> The results are expressed as sum of glyphosate and AMPA considering a molecular weight correction factor of 1.52.

- (a): Median residues expressed according to the residue definition for monitoring, recalculated at the 1N rate for the median dietary burden.
- (b): Highest residues expressed according to the residue definition for monitoring, recalculated at the 1N rate for the maximum dietary burden.
- (c): Conversion factor to recalculate residues according to the residue definition for monitoring to the residue definition for risk assessment; proposed as 1 since *N*-acetyl glyphosate and AMPA is not expected at significant levels.
- (d): Closest feeding level and N dose rate related to the maximum dietary burden.
- (e): Since extrapolation from cattle to other ruminants and swine is acceptable, results of the livestock feeding study on ruminants were relied upon to derive the MRL and risk assessment values in sheep and swine.

### Consumer risk assessment

The consumer risk assessment is provisional and pending the **data gaps** on the magnitude of residue studies in rotational crops and consequently the update of the animal dietary burden calculation.

|                                                  |                                                                                                                                                                                                                                                                                                                                                                                                                  |
|--------------------------------------------------|------------------------------------------------------------------------------------------------------------------------------------------------------------------------------------------------------------------------------------------------------------------------------------------------------------------------------------------------------------------------------------------------------------------|
| ARfD                                             | 1.5 mg/kg bw                                                                                                                                                                                                                                                                                                                                                                                                     |
| Highest IESTI, according to EFSA PRIMo (rev.3.1) | Honey and other apicultural products: 2% of ARfD                                                                                                                                                                                                                                                                                                                                                                 |
| NESTI (% ARfD)                                   | Not applicable                                                                                                                                                                                                                                                                                                                                                                                                   |
| Assumptions made for the calculations            | The calculation is based on the highest residue levels. However, field residue trials for most of the proposed uses were limited and below the requirements as specified in SANTE/2019/12752 (European Commission, 2019). Data gaps have been identified by EFSA<br><br>Data from available field rotational crops trials were also considered, however, a <b>data gap</b> was set to provide additional trials. |
| ADI                                              | 0.5 mg/kg bw per day                                                                                                                                                                                                                                                                                                                                                                                             |
| TMDI according to EFSA PRIMo                     | Highest TMDI: 3 % ADI (NL toddlers)                                                                                                                                                                                                                                                                                                                                                                              |
| NTMDI                                            | Not applicable                                                                                                                                                                                                                                                                                                                                                                                                   |
| Highest IEDI                                     | Not applicable                                                                                                                                                                                                                                                                                                                                                                                                   |
| NEDI (% ADI)                                     | Not applicable                                                                                                                                                                                                                                                                                                                                                                                                   |
| Assumptions made for the calculations            | The calculation is based on the median residue levels. However, field residue trials for most of the proposed uses were limited and below the requirements as specified in SANTE/2019/12752 (European Commission, 2019). Data gaps have been identified by EFSA.<br>Data from available field rotational crops trials were also considered, however, a <b>data gap</b> was set to provide additional trials.     |

### Recommended MRLs

All proposals below (with the exception for honey) should be considered provisional pending data gaps identified for additional residue trials and option decided by risk managers on the residue definition for monitoring.

| Code <sup>(a)</sup>                               | Commodity                                  | Existing EU MRL (mg/kg) | Proposed EU MRL (mg/kg) | Comment/justification                                                                                                                                                                                                                   |
|---------------------------------------------------|--------------------------------------------|-------------------------|-------------------------|-----------------------------------------------------------------------------------------------------------------------------------------------------------------------------------------------------------------------------------------|
| <b>Enforcement residue definition:</b> Glyphosate |                                            |                         |                         |                                                                                                                                                                                                                                         |
| <b>Representative uses</b>                        |                                            |                         |                         |                                                                                                                                                                                                                                         |
| 0110000                                           | Citrus fruit                               | 0.1*-0.5                | 0.05*                   | The MRL proposal reflects the NEU and SEU post-emergence use. Risk for consumers unlikely.                                                                                                                                              |
| 0120000                                           | Tree nuts                                  | 0.1*                    | 0.05*                   |                                                                                                                                                                                                                                         |
| 0130000                                           | Pome fruit                                 | 0.1*                    | 0.05*                   |                                                                                                                                                                                                                                         |
| 0140000                                           | Stone fruit                                | 0.1*                    | 0.05*                   |                                                                                                                                                                                                                                         |
| 0151000                                           | Table and wine grapes                      | 0.5                     | 0.05*                   | The MRL proposal reflects the NEU and SEU post-emergence use. Risk for consumers unlikely.                                                                                                                                              |
| 0161030                                           | Table olives                               | 1                       | 2                       | The MRL proposal reflects the SEU post-emergence use. <b>MRL exceedances cannot be excluded with the current MRL.</b><br>For the NEU use the data were not sufficient to derive a MRL proposal (data gap). Risk for consumers unlikely. |
| 0162010                                           | Kiwi                                       | 0.1*                    | 0.05*                   | The MRL proposal reflects the NEU and SEU post-emergence use. Risk for consumers unlikely.                                                                                                                                              |
| 0163020                                           | Banana                                     | 0.1*                    | 0.05*                   |                                                                                                                                                                                                                                         |
| 0210000                                           | Root and tuber vegetables                  | 0.1*-0.5                | 0.05*                   | The MRL proposal reflects the NEU and SEU post-harvest, pre-sowing, pre-planting, pre-emergence, and inter-row use. Risk for consumers unlikely.                                                                                        |
| 0220000                                           | Bulb vegetables                            | 0.1*                    | 0.05*                   |                                                                                                                                                                                                                                         |
| 0230000                                           | Fruiting vegetables                        | 0.1*-3                  | 0.05*                   |                                                                                                                                                                                                                                         |
| 0240000                                           | Brassica vegetables                        | 0.1*                    | 0.05*                   | The MRL proposal reflects the NEU and SEU post-harvest, pre-sowing, pre-planting, pre-emergence use. Risk for consumers unlikely.                                                                                                       |
| 0250000                                           | Leafy vegetables, herbs and edible flowers | 0.1*                    | 0.05*                   | The MRL proposal reflects the NEU and SEU post-harvest, pre-sowing, pre-planting, pre-emergence, and inter-row use. Risk for consumers unlikely.                                                                                        |
| 0260000                                           | Legume vegetables                          | 0.1*                    | 0.05*                   | The MRL proposal reflects the NEU and SEU inter-row use. Risk for consumers unlikely.                                                                                                                                                   |
| 0270000                                           | Stem vegetables                            | 0.1*                    | 0.05*                   | The MRL proposal reflects the NEU and SEU post-harvest, pre-sowing, pre-planting, pre-emergence use. Risk for consumers unlikely.                                                                                                       |
| 0900010                                           | Sugar beet roots                           | 15                      | 0.05*                   |                                                                                                                                                                                                                                         |
| <b>MRL application</b>                            |                                            |                         |                         |                                                                                                                                                                                                                                         |
| 1040000                                           | Honey                                      | 0.05*                   | 15                      | Based on the available data, an MRL for honey can be proposed.<br>Risk for consumers unlikely.                                                                                                                                          |

| <b>Code<sup>(a)</sup></b> | <b>Commodity</b> | <b>Existing EU MRL (mg/kg)</b> | <b>Proposed EU MRL (mg/kg)</b> | <b>Comment/justification</b>                             |
|---------------------------|------------------|--------------------------------|--------------------------------|----------------------------------------------------------|
|                           |                  |                                |                                | <b>Exceedance of the current MRL cannot be excluded.</b> |

\* Indicates that the MRL is set at the limit of analytical quantification (LOQ)  
(a): Commodity code number according to Annex I of Regulation (EC) No 396/2005  
(F): Fat soluble

-

### Environmental fate and behaviour

#### Route of degradation (aerobic) in soil (Regulation (EU) N° 283/2013, Annex Part A, point 7.1.1.1)

|                                                                                                  |                                                                                                    |
|--------------------------------------------------------------------------------------------------|----------------------------------------------------------------------------------------------------|
| Mineralisation after 100 days                                                                    | 16.9-70.6 % AR after 70-364 d (n <sup>16</sup> = 10)                                               |
| Non-extractable residues after 100 days                                                          | 2.5-21.6 % AR after 14-364 d (n = 10)                                                              |
| Metabolites requiring further consideration - name and/or code, % of applied (range and maximum) | AMPA:<br>Laboratory: 42.4 % AR after 7 d (n= 10)<br>Field: 48.8% on molar basis after 271 d (n= 6) |

#### Route of degradation (anaerobic) in soil (Regulation (EU) N° 283/2013, Annex Part A, point 7.1.1.2)

|                                                                                                                             |                                                                                                                                         |
|-----------------------------------------------------------------------------------------------------------------------------|-----------------------------------------------------------------------------------------------------------------------------------------|
| Mineralisation after 100 days                                                                                               | 12.5 % AR after 120 d (n= 1)<br>(12.4 % AR after the preliminary 10 days under aerobic conditions)                                      |
| Non-extractable residues after 100 days                                                                                     | 22.5 % AR after 120 d (n= 1)<br>(15.0 % AR after the preliminary 10 days under aerobic conditions)                                      |
| Metabolites that may require further consideration for risk assessment - name and/or code, % of applied (range and maximum) | AMPA – 30.2 % AR (water phase and soil extracts) after 84 d (n=1)<br>(19.2 % AR after the preliminary 10 days under aerobic conditions) |

#### Route of degradation (photolysis) on soil (Regulation (EU) N° 283/2013, Annex Part A, point 7.1.1.3)

|                                                                                                                             |                                                                                            |
|-----------------------------------------------------------------------------------------------------------------------------|--------------------------------------------------------------------------------------------|
| Metabolites that may require further consideration for risk assessment - name and/or code, % of applied (range and maximum) | AMPA – 8.2 % AR after 7 d (n=1)<br>(minor non transient) (6.1 % after 3 d in dark control) |
| Mineralisation at study end                                                                                                 | 14.6 % AR after 30 d (n= 1)                                                                |
| Non-extractable residues at study end                                                                                       | 15.5 % AR after 30 d (n= 1)                                                                |

<sup>16</sup> n corresponds to the number of soils.

**Rate of degradation in soil (aerobic) laboratory studies active substance (Regulation (EU) N° 283/2013, Annex Part A, point 7.1.2.1.1 and Regulation (EU) N° 284/2013, Annex Part A, point 9.1.1.1)**

| Parent                   | Dark aerobic conditions – Trigger endpoints |                 |                                        |                                                                                                                 |                       |                       |
|--------------------------|---------------------------------------------|-----------------|----------------------------------------|-----------------------------------------------------------------------------------------------------------------|-----------------------|-----------------------|
| Soil                     | pH (H <sub>2</sub> O)                       | t. °C / % MWHC  | DT <sub>50</sub> /DT <sub>90</sub> (d) | Kinetic parameters                                                                                              | St. (χ <sup>2</sup> ) | Method of calculation |
| Gartenacker Loam         | 7.1                                         | 20 / 50 % pF2.5 | 8.8/57.3                               | k <sub>1</sub> : 0.2138 d <sup>-1</sup><br>k <sub>2</sub> : 0.03023 d <sup>-1</sup><br>g: 0.4345                | 2.9                   | DFOP                  |
| Drusenheim Loam          | 7.4                                         | 20 / 50 % pF2.5 | 2.3 / 14.9                             | α: 1.414<br>β: 3.635                                                                                            | 4.2                   | FOMC                  |
| Pappelacker Sandy loam   | 7.0                                         | 20 / 50 % pF2.5 | 3.9 / 38.7                             | k <sub>1</sub> : 0.3125 d <sup>-1</sup><br>k <sub>2</sub> : 0.03172 d <sup>-1</sup><br>g: 0.6584                | 5.0                   | DFOP                  |
| 18-Acres Sandy clay loam | 5.7                                         | 20 / 50 % pF2.5 | 78.6 / 588                             | k <sub>1</sub> : 0.05856 d <sup>-1</sup><br>k <sub>2</sub> : 0.003146 d <sup>-1</sup><br>g: 0.3644              | 3.4                   | DFOP                  |
| Soil B Sandy loam        | 6.7                                         | 25 / 75 % FC    | 0.7 / 16.2                             | k <sub>1</sub> : 2.306 d <sup>-1</sup><br>k <sub>2</sub> : 0.08875 d <sup>-1</sup><br>g: 0.58                   | 8.2                   | DFOP                  |
| Arrow Sandy loam         | 6.4 <sup>a</sup>                            | 20 / 40         | 37.8 / 1660                            | α: 0.4539<br>β: 10.47                                                                                           | 2.3                   | FOMC                  |
| Les Evouettes Silt loam  | 6.1 <sup>b</sup>                            | 20 / 40         | 11.5 / 358                             | α: 0.51<br>β: 3.96                                                                                              | 5.9                   | FOMC                  |
| Speyer 2.2 Sand          | 6.0 <sup>b</sup>                            | 20 / 40         | 6.2 / 152                              | k <sub>1</sub> : 0.1114 d <sup>-1</sup><br>k <sub>2</sub> : 0.0108 d <sup>-1</sup><br>t <sub>b</sub> : 6.6480 d | 8.6                   | HS                    |
| Speyer 2.3 Loamy sand    | 6.9 <sup>b</sup>                            | 20 / 40         | 6.2 / 20.4                             | k: 0.1127 d <sup>-1</sup>                                                                                       | 8.0                   | SFO                   |

<sup>a</sup> Calculated with equation reported in EFSA guidance 2017<sup>17</sup>:  $pH_{H_2O} = 0.982pH_{CaCl_2} + 0.648$ .

<sup>b</sup> Medium not reported, H<sub>2</sub>O assumed

For modelling endpoints of glyphosate, two datasets are presented:

- Endpoints derived from parent-only fits;
- Endpoints derived from pathway fits (glyphosate → AMPA).

| Parent                   | Dark aerobic conditions – Modelling endpoints based on parent-only fits |                 |                                               |                                                              |                                                   |                                                                |                       |                       |
|--------------------------|-------------------------------------------------------------------------|-----------------|-----------------------------------------------|--------------------------------------------------------------|---------------------------------------------------|----------------------------------------------------------------|-----------------------|-----------------------|
| Soil                     | pH (H <sub>2</sub> O)                                                   | t. °C / % MWHC  | Actual DT <sub>50</sub> /DT <sub>90</sub> (d) | Modelling DT <sub>50</sub> (d) (not normalized) <sup>a</sup> | DT <sub>50</sub> (d) 20 °C pF2/10kPa <sup>b</sup> | DT <sub>90</sub> <sup>c</sup> (d) 20 °C pF2/10kPa <sup>a</sup> | St. (χ <sup>2</sup> ) | Method of calculation |
| Gartenacker Loam         | 7.1                                                                     | 20 / 50 % pF2.5 | 9.0/60                                        | 18.1                                                         | 9.9                                               | 33.0                                                           | 4.0                   | FOMC                  |
| Drusenheim Loam          | 7.4                                                                     | 20 / 50 % pF2.5 | 2.3/15                                        | 4.5                                                          | 2.2                                               | 7.2                                                            | 4.2                   | FOMC                  |
| Pappelacker Sandy loam   | 7.0                                                                     | 20 / 50 % pF2.5 | 4.0/37                                        | 11.1                                                         | 5.1                                               | 17.0                                                           | 4.5                   | FOMC                  |
| 18-Acres Sandy clay loam | 5.7                                                                     | 20 / 50 % pF2.5 | 76.3/523                                      | 192.6                                                        | 109.8                                             | 298.1                                                          | 2.6                   | DFOP                  |
| Soil B Sandy loam        | 6.7                                                                     | 25 / 75 % FC    | 1.0/20.1                                      | 6.1                                                          | 6.5                                               | 21.7                                                           | 8.6                   | FOMC                  |

<sup>17</sup> EFSA (European Food Safety Authority), 2017. EFSA Guidance Document for predicting environmental concentrations of active substances of plant protection products and transformation products of these active substances in soil. EFSA Journal 2017;15(10):4982, 115 pp. <https://doi.org/10.2903/j.efsa.2017.4982>



|                         |                  |         |           |       |                                                       |       |     |      |
|-------------------------|------------------|---------|-----------|-------|-------------------------------------------------------|-------|-----|------|
| Arrow Sandy loam        | 6.4 <sup>c</sup> | 20 / 40 | 37.4/440  | 187.3 | 161.1                                                 | 378.4 | 3.6 | DFOP |
| Les Evouettes Silt loam | 6.1 <sup>d</sup> | 20 / 40 | 11.5/358  | 107.8 | 71.2                                                  | 236.3 | 5.9 | FOMC |
| Speyer 2.2 Sand         | 6.0 <sup>d</sup> | 20 / 40 | 6.2 / 152 | 64.2  | 44.3                                                  | 104.9 | 8.6 | HS   |
| Speyer 2.3 Loamy sand   | 6.9 <sup>d</sup> | 20 / 40 | 6.1/20.3  | 6.1   | 3.2                                                   | 10.8  | 8.0 | SFO  |
| pH dependence           |                  |         |           |       | Yes, glyphosate is more persistent with decreasing pH |       |     |      |

<sup>a</sup> DT90/3.32 for FOMC kinetics; ln(2)/k2 value for DFOP kinetics

<sup>b</sup> Normalised using a Q<sub>10</sub> of 2.58 and Walker equation coefficient of 0.7

<sup>c</sup> Calculated with equation reported in EFSA guidance 2017<sup>4</sup>:  $pH_{H_2O}=0.982pH_{CaCl_2} + 0.648$ .

<sup>d</sup> Medium not reported, H<sub>2</sub>O assumed

<sup>e</sup> Modelling DT90 also reported since it is used to assess pH-dependency

| Parent                   | Dark aerobic conditions – <b>Modelling endpoints based on pathway fit</b> (glyphosate → AMPA) |                 |                                        |                                                                                                                 |                                                               |                                                                |                       |                       |
|--------------------------|-----------------------------------------------------------------------------------------------|-----------------|----------------------------------------|-----------------------------------------------------------------------------------------------------------------|---------------------------------------------------------------|----------------------------------------------------------------|-----------------------|-----------------------|
| Soil                     | pH (H <sub>2</sub> O)                                                                         | t. °C / % MWHC  | DT <sub>50</sub> /DT <sub>90</sub> (d) | Kinetic parameters                                                                                              | Fast   Slow DT <sub>50</sub> (d) 20 °C pF2/10kPa <sup>a</sup> | DT <sub>90</sub> <sup>d</sup> (d) 20 °C pF2/10kPa <sup>a</sup> | St. (χ <sup>2</sup> ) | Method of calculation |
| Gartenacker Loam         | 7.1                                                                                           | 20 / 50 % pF2.5 | 8.8 / 57.3                             | k <sub>1</sub> : 0.2138 d <sup>-1</sup><br>k <sub>2</sub> : 0.03023 d <sup>-1</sup><br>g: 0.4345                | 1.8   12.6                                                    | 31.5                                                           | 2.9                   | DFOP                  |
| Drusenheim Loam          | 7.4                                                                                           | 20 / 50 % pF2.5 | 2.3 / 13.4                             | k <sub>1</sub> : 0.9889 d <sup>-1</sup><br>k <sub>2</sub> : 0.1375 d <sup>-1</sup><br>g: 0.3704                 | 0.3   2.4                                                     | 6.4                                                            | 4.9                   | DFOP                  |
| Pappelacker Sandy loam   | 7.0                                                                                           | 20 / 50 % pF2.5 | 3.9 / 38.7                             | k <sub>1</sub> : 0.3125 d <sup>-1</sup><br>k <sub>2</sub> : 0.03172 d <sup>-1</sup><br>g: 0.6584                | 1.0   10.1                                                    | 17.8                                                           | 5.0                   | DFOP                  |
| 18-Acres Sandy clay loam | 5.7                                                                                           | 20 / 50 % pF2.5 | 78.6 / 588                             | k <sub>1</sub> : 0.05856 d <sup>-1</sup><br>k <sub>2</sub> : 0.003146 d <sup>-1</sup><br>g: 0.3644              | 6.7   125.6                                                   | 335.2                                                          | 3.4                   | DFOP                  |
| Soil B Sandy loam        | 6.7                                                                                           | 25 / 75 % FC    | 0.7 / 16.2                             | k <sub>1</sub> : 2.306 d <sup>-1</sup><br>k <sub>2</sub> : 0.08875 d <sup>-1</sup><br>g: 0.58                   | 0.3   8.4                                                     | 17.5                                                           | 8.2                   | DFOP                  |
| Arrow Sandy loam         | 6.4 <sup>b</sup>                                                                              | 20 / 40         | 37.4 / 440                             | k <sub>1</sub> : 0.0595 d <sup>-1</sup><br>k <sub>2</sub> : 0.0037 d <sup>-1</sup><br>g: 0.4852                 | 10.0   161.1                                                  | 378.4                                                          | 3.6                   | DFOP                  |
| Les Evouettes Silt loam  | 6.1 <sup>c</sup>                                                                              | 20 / 40         | 9.8 / 192                              | k <sub>1</sub> : 0.2084 d <sup>-1</sup><br>k <sub>2</sub> : 0.008013 d <sup>-1</sup><br>g: 0.5339               | 2.2   57.1                                                    | 126.7                                                          | 5.9                   | DFOP                  |
| Speyer 2.2 Sand          | 6.0 <sup>c</sup>                                                                              | 20 / 40         | 6.2 / 152                              | k <sub>1</sub> : 0.1114 d <sup>-1</sup><br>k <sub>2</sub> : 0.0108 d <sup>-1</sup><br>t <sub>b</sub> : 6.6480 d | 4.3 / 44.3                                                    | 104.9                                                          | 8.6                   | HS                    |
| Speyer 2.3 Loamy sand    | 6.9 <sup>c</sup>                                                                              | 20 / 40         | 6.2 / 20.4                             | k: 0.1127 d <sup>-1</sup>                                                                                       | 3.3                                                           | 10.8                                                           | 8.0                   | SFO                   |
| pH dependence            |                                                                                               |                 |                                        |                                                                                                                 | Yes, glyphosate is more persistent with decreasing pH         |                                                                |                       |                       |

<sup>a</sup> Normalised using a Q<sub>10</sub> of 2.58 and Walker equation coefficient of 0.7

<sup>b</sup> Calculated with equation reported in EFSA guidance 2017<sup>18</sup>:  $pH_{H_2O}=0.982pH_{CaCl_2} + 0.648$ .

<sup>c</sup> Medium not reported, H<sub>2</sub>O assumed

<sup>d</sup> Modelling DT90 also reported since it is used to assess pH-dependency

<sup>18</sup> EFSA (European Food Safety Authority), 2017. EFSA Guidance Document for predicting environmental concentrations of active substances of plant protection products and transformation products of these active substances in soil. EFSA Journal 2017;15(10):4982, 115 pp. <https://doi.org/10.2903/j.efsa.2017.4982>

**Rate of degradation in soil (aerobic) laboratory studies transformation products (Regulation (EU) N° 283/2013, Annex Part A, point 7.1.2.1.2 and Regulation (EU) N° 284/2013, Annex Part A, point 9.1.1.1)**

| AMPA                                                                                                                         |                       |                    |                                            |                                          |                                  |                          |                          |
|------------------------------------------------------------------------------------------------------------------------------|-----------------------|--------------------|--------------------------------------------|------------------------------------------|----------------------------------|--------------------------|--------------------------|
| Dark aerobic conditions - Trigger endpoints Metabolite dosed or the precursor from which the f.f. was derived was glyphosate |                       |                    |                                            |                                          |                                  |                          |                          |
| Soil                                                                                                                         | pH (H <sub>2</sub> O) | t. °C / %<br>MWHC  | DT <sub>50</sub> / DT <sub>90</sub><br>(d) | f. f. k <sub>f</sub><br>/k <sub>dp</sub> | Kinetic<br>parameters            | St.<br>(χ <sup>2</sup> ) | Method of<br>calculation |
| Gartenacker Loam                                                                                                             | 7.1                   | 20 / 50 %<br>pF2.5 | 112 / 373                                  | 0.1955                                   | k: 0.006181<br>d <sup>-1</sup>   | 7.6                      | SFO                      |
| Drusenheim Loam                                                                                                              | 7.4                   | 20 / 50 %<br>pF2.5 | 28.6 / 95.1                                | 0.3000                                   | k: 0.02421 d <sup>-1</sup>       | 3.5                      | SFO                      |
| Pappelacker Sandy loam                                                                                                       | 7.0                   | 20 / 50 %<br>pF2.5 | 88.2 / 293                                 | 0.2004                                   | k: 0.007863<br>d <sup>-1</sup>   | 6.2                      | SFO                      |
| 18-Acres Sandy clay loam                                                                                                     | 5.7                   | 20 / 50 %<br>pF2.5 | 1000 / 3320                                | 0.2618                                   | k: 0.000693<br>d <sup>-1</sup>   | 9.2                      | SFO                      |
| Soil B Sandy loam                                                                                                            | 6.7                   | 25 / 75 %<br>FC    | 96.4 / 320                                 | 0.2793                                   | k: 0.007187<br>d <sup>-1</sup>   | 10.1                     | SFO                      |
| Speyer 2.3 Loamy sand                                                                                                        | 6.9 <sup>a</sup>      | 20 / 40            | 79.2 / 263                                 | 0.3406                                   | k: 0.008753<br>d <sup>-1</sup>   | 8.2                      | SFO                      |
| Warsop Loamy sand                                                                                                            | 4.71                  | 20 / pF 2          | 326 / 1080                                 | -                                        | k: 0.002128<br>d <sup>-1</sup>   | 1.3                      | SFO                      |
| 18-Acres Sandy clay loam                                                                                                     | 5.5                   | 20 / pF 2          | 1040 / 3450                                | -                                        | k: 0.000667<br>d <sup>-1</sup>   | 3.0                      | SFO                      |
| Brierlow, Silt loam                                                                                                          | 5.7                   | 20 / pF 2          | 1000 <sup>b</sup> /<br>3320                | -                                        | k: 0.000693<br>d <sup>-1 b</sup> | -                        | SFO                      |

<sup>a</sup> Medium not reported, H<sub>2</sub>O assumed    <sup>b</sup> Default value

| AMPA                                                                                                                                  |                       |                    |                                            |                                          |                                                         |                          |                          |
|---------------------------------------------------------------------------------------------------------------------------------------|-----------------------|--------------------|--------------------------------------------|------------------------------------------|---------------------------------------------------------|--------------------------|--------------------------|
| Dark aerobic conditions - <b>Modelling endpoints</b> Metabolite dosed or the precursor from which the f.f. was derived was glyphosate |                       |                    |                                            |                                          |                                                         |                          |                          |
| Soil                                                                                                                                  | pH (H <sub>2</sub> O) | t. °C / %<br>MWHC  | DT <sub>50</sub> / DT <sub>90</sub><br>(d) | f. f. k <sub>f</sub><br>/k <sub>dp</sub> | DT <sub>50</sub> (d)<br>20 °C<br>pF2/10kPa <sup>b</sup> | St.<br>(χ <sup>2</sup> ) | Method of<br>calculation |
| Gartenacker Loam                                                                                                                      | 7.1                   | 20 / 50 %<br>pF2.5 | 112 / 373                                  | 0.1955                                   | 61.6                                                    | 7.6                      | SFO                      |
| Drusenheim Loam                                                                                                                       | 7.4                   | 20 / 50 %<br>pF2.5 | 28.0 / 92.5                                | 0.2974                                   | 13.4                                                    | 3.9                      | SFO                      |
| Pappelacker Sandy loam                                                                                                                | 7.0                   | 20 / 50 %<br>pF2.5 | 88.2 / 293                                 | 0.2004                                   | 40.6                                                    | 6.2                      | SFO                      |
| 18-Acres Sandy clay loam                                                                                                              | 5.7                   | 20 / 50 %<br>pF2.5 | 1000 / 3320                                | 0.2618                                   | 570                                                     | 9.2                      | SFO                      |
| Soil B Sandy loam                                                                                                                     | 6.7                   | 25 / 75 %<br>FC    | 96.4 / 320                                 | 0.2793                                   | 104                                                     | 10.1                     | SFO                      |
| Speyer 2.3 Loamy sand                                                                                                                 | 6.9 <sup>a</sup>      | 20 / 40            | 79.2 / 263                                 | 0.3406                                   | 42                                                      | 8.2                      | SFO                      |
| Warsop Loamy sand                                                                                                                     | 4.71                  | 20 / pF 2          | 326 / 1080                                 | -                                        | 326                                                     | 1.3                      | SFO                      |
| 18-Acres Sandy clay loam                                                                                                              | 5.5                   | 20 / pF 2          | 1040 / 3450                                | -                                        | 1040                                                    | 3.0                      | SFO                      |
| Brierlow, Silt loam                                                                                                                   | 5.7                   | 20 / pF 2          | 1000 <sup>c</sup> /<br>3320                | -                                        | 1000                                                    | -                        | SFO                      |
| Mean value (n= 6)                                                                                                                     |                       |                    |                                            | 0.2625                                   |                                                         |                          |                          |
| Geomean value<br>pH <sub>water</sub> ≤ 6.5 (n=4)                                                                                      |                       |                    |                                            |                                          | 663                                                     |                          |                          |
| Geomean value<br>pH <sub>water</sub> > 6.5<br>(n=5)                                                                                   |                       |                    |                                            |                                          | 43                                                      |                          |                          |
| pH dependence                                                                                                                         |                       |                    |                                            |                                          | Yes, AMPA is more persistent with decreasing pH         |                          |                          |

<sup>a</sup> Medium not reported, H<sub>2</sub>O assumed

<sup>b</sup> Normalised using a Q<sub>10</sub> of 2.58 and Walker equation coefficient of 0.7

<sup>c</sup> Default value

**Rate of degradation field soil dissipation studies (Regulation (EU) N° 283/2013, Annex Part A, point 7.1.2.2.1 and Regulation (EU) N° 284/2013, Annex Part A, point 9.1.1.2.1)**

| Parent                                  | Aerobic conditions – trigger endpoints |                   |            |                                                |                                                                                                   |                       |                       |
|-----------------------------------------|----------------------------------------|-------------------|------------|------------------------------------------------|---------------------------------------------------------------------------------------------------|-----------------------|-----------------------|
| Soil                                    | Location                               | pH                | Depth (cm) | DT <sub>50</sub> / DT <sub>90</sub> (d) Actual | Kinetic parameters                                                                                | St. (χ <sup>2</sup> ) | Method of calculation |
| Egerkingen<br>Clay loam (bare soil)     | Switzerland                            | 7.79 <sup>a</sup> | 0-30       | 1.1 / 173                                      | k <sub>1</sub> : 2.613 d <sup>-1</sup><br>k <sub>2</sub> : 0.0089 d <sup>-1</sup><br>g: 0.5286    | 5.4                   | DFOP                  |
| Bad Krozingen<br>Sandy loam (bare soil) | Germany                                | 6.6 <sup>a</sup>  | 0-30       | 2.7 / 116                                      | α: 0.4565<br>β: 0.753                                                                             | 5.6                   | FOMC                  |
| Menslage<br>Sand (bare soil)            | Germany                                | 5.6 <sup>a</sup>  | 0-30       | 5.7 / 192                                      | k <sub>1</sub> : 0.1789 d <sup>-1</sup><br>k <sub>2</sub> : 0.0043 d <sup>-1</sup><br>g: 0.7734   | 9.5                   | DFOP                  |
| Ontario<br>Loamy sand (bare soil)       | Canada                                 | 6.8 <sup>b</sup>  | 0-45       | 13.5 / 51.6                                    | k <sub>1</sub> : 0.05519 d <sup>-1</sup><br>k <sub>2</sub> : 0.00151 d <sup>-1</sup><br>g: 0.9515 | 22.9                  | DFOP                  |
| California<br>Loamy sand (bare soil)    | USA                                    | 6.3 <sup>b</sup>  | 0-121.9    | 12.2 / 98.4                                    | k <sub>1</sub> : 0.1175 d <sup>-1</sup><br>k <sub>2</sub> : 0.01511 d <sup>-1</sup><br>g: 0.5579  | 12.8                  | DFOP                  |
| California<br>Sandy loam (bare soil)    | USA                                    | 7.1 <sup>b</sup>  | 0-121.9    | 4.6 / 31.8                                     | k <sub>1</sub> : 0.2757 d <sup>-1</sup><br>k <sub>2</sub> : 0.0444 d <sup>-1</sup><br>g: 0.5904   | 4.8                   | DFOP                  |

<sup>a</sup>) Measured in KCl in the study, converted to pH<sub>H2O</sub> considering the formula  $pH_{H2O} = 0.860pH_{KCl} + 1.482$  presented in the EFSA guidance for predicting environmental concentration in soil (2017)

<sup>b</sup>) Medium not given – value from the 0-15 cm depth layer

| Parent                               | Aerobic conditions – <b>modelling endpoints</b> <sup>d</sup> |                  |            |                                          |                                          |                                          |                       |                       |
|--------------------------------------|--------------------------------------------------------------|------------------|------------|------------------------------------------|------------------------------------------|------------------------------------------|-----------------------|-----------------------|
| Soil                                 | Location.                                                    | pH               | Depth (cm) | DT <sub>50</sub> (d) Norm <sup>b</sup> . | Kinetic parameters                       | DT <sub>90</sub> (d) Norm <sup>b</sup> . | St. (χ <sup>2</sup> ) | Method of calculation |
| Menslage<br>Sand (bare soil)         | Germany                                                      | 5.6 <sup>a</sup> | 0-30       | 44.7                                     | k <sub>2</sub> : 0.01551 d <sup>-1</sup> | 62.9                                     | 6.8                   | HS – slow phase       |
| California<br>Loamy sand (bare soil) | USA                                                          | 6.3 <sup>c</sup> | 0-121.9    | 47.0                                     | k <sub>2</sub> : 0.01474 d <sup>-1</sup> | 86.9                                     | 11.7                  | DFOP – slow phase     |
| California<br>Sandy loam (bare soil) | USA                                                          | 7.1 <sup>c</sup> | 0-121.9    | 25.6                                     | k <sub>2</sub> : 0.02707 d <sup>-1</sup> | 51.9                                     | 4.4                   | DFOP – slow phase     |

<sup>a</sup>) Measured in KCl in the study, converted to pH<sub>H2O</sub> considering the formula  $pH_{H2O} = 0.860pH_{KCl} + 1.482$  presented in the EFSA guidance for predicting environmental concentration in soil (2017)

<sup>b</sup>) Normalised using a Q10 of 2.58 and Walker equation coefficient of 0.7, values are DegT50matrix

<sup>c</sup>) Medium not given – value from the 0-15 cm depth layer

<sup>d</sup>) For the field trials Egerkingen (Switzerland) and Bad Krozingen (Germany) reliable estimation of kinetic parameters could not be derived. For the field trial Ontario (Canada) the normalisation procedure to derive modelling endpoint was not possible due to the lack of daily meteorological data.

**Rate of degradation field soil dissipation studies (Regulation (EU) N° 283/2013, Annex Part A, point 7.1.2.2.1 and Regulation (EU) N° 284/2013, Annex Part A, point 9.1.1.2.1)**

Reliable field data were not available for AMPA.: Data gap.

**Combined laboratory and field kinetic endpoints for modelling (when not from different populations)**

Rate of degradation in soil active substance, normalised geometric mean (if not pH dependent)

Laboratory and field data can be pooled  
 For more clarity, tables with pooled data for glyphosate are reported hereafter  
 Tier 1 modelling endpoints:  
 - Parent only fits (glyphosate simulated alone): 161.1 d (max. value due to pH-dependence, n=12)  
 - Pathway fits (glyphosate simulated along with AMPA): 2 sets of simulations:  
   o 0.3 d (min. fast-phase value due to pH-dependence, n=9);  
   o 161.1 d (max. slow-phase value due to pH-dependence, n=12)  
 Tier 2 modelling endpoints:  
 - Parent only fits (glyphosate simulated alone):  
   o Soil pH<sub>water</sub> ≤ 6.5: 70.0 d (geomean, n=6)  
   o Soil pH<sub>water</sub> > 6.5: 6.2 d (geomean, n=6)  
 - Pathway fits (glyphosate simulated along with AMPA): 2 sets of simulations per pH range:  
   o Soil pH<sub>water</sub> ≤ 6.5: 5 d (geomean of fast-phase, n =4) ; 69.0 d (geomean of slow-phase, n=6)  
 Soil pH<sub>water</sub> > 6.5: 0.88 d (geomean of fast-phase, n =5) ; 7.7 d (geomean of slow-phase, n=6)

Rate of degradation in soil transformation products, normalised geometric mean (if not pH dependent)

No modelling field value for AMPA

Kinetic formation fraction (f. f. k<sub>f</sub> / k<sub>dp</sub>) of transformation products, arithmetic mean

No modelling field value for AMPA

**Glyphosate combined laboratory and field kinetic endpoints for modelling:**

| Lab/field | Parent<br>Soil           | Dark aerobic conditions – |                |                                                   |                       |                                                               |                       |
|-----------|--------------------------|---------------------------|----------------|---------------------------------------------------|-----------------------|---------------------------------------------------------------|-----------------------|
|           |                          | pH (H <sub>2</sub> O)     | t. °C / % MWHC | Modelling endpoints based on parent-only fits     |                       | Modelling endpoints based on pathway fits (glyphosate → AMPA) |                       |
|           |                          |                           |                | DT <sub>50</sub> (d) 20 °C pF2/10kPa <sup>a</sup> | Method of calculation | Fast   Slow DT <sub>50</sub> (d) 20 °C pF2/10kPa <sup>a</sup> | Method of calculation |
| lab       | Gartenacker Loam         | 7.1                       | 20 / 50% pF2.5 | 9.9                                               | FOMC                  | 1.8   12.6                                                    | DFOP                  |
|           | Drusenheim Loam          | 7.4                       | 20 / 50% pF2.5 | 2.2                                               | FOMC                  | 0.3   2.4                                                     | DFOP                  |
|           | Pappelacker Sandy loam   | 7.0                       | 20 / 50% pF2.5 | 5.1                                               | FOMC                  | 1.0   10.1                                                    | DFOP                  |
|           | 18-Acres Sandy clay loam | 5.7                       | 20 / 50% pF2.5 | 109.8                                             | DFOP                  | 6.7   125.6                                                   | DFOP                  |

|                                       |                                                               |                  |                 |                              |                      |                                                                                 |                      |
|---------------------------------------|---------------------------------------------------------------|------------------|-----------------|------------------------------|----------------------|---------------------------------------------------------------------------------|----------------------|
|                                       | Soil B<br>Sandy loam                                          | 6.7              | 25 / 75<br>% FC | 6.5                          | FOMC                 | 0.3   8.4                                                                       | DFOP                 |
|                                       | Arrow<br>Sandy loam                                           | 6.4 <sup>b</sup> | 20 / 40         | 161.1                        | DFOP                 | 10.0   161.1                                                                    | DFOP                 |
|                                       | Les Evouettes<br>Silt loam                                    | 6.1 <sup>c</sup> | 20 / 40         | 71.2                         | FOMC                 | 2.2   57.1                                                                      | DFOP                 |
|                                       | Speyer 2.2<br>Sand                                            | 6.0 <sup>c</sup> | 20 / 40         | 44.3                         | HS                   | 4.3 / 44.3                                                                      | HS                   |
|                                       | Speyer 2.3<br>Loamy sand                                      | 6.9 <sup>c</sup> | 20 / 40         | 3.2                          | SFO                  | 3.3 <sup>e</sup>                                                                | SFO                  |
| field                                 | Menslage (GE)<br>Sand (bare<br>soil)                          | 5.6 <sup>d</sup> |                 | 44.7                         | HS – slow<br>phase   | 44.7 <sup>f</sup>                                                               | HS – slow<br>phase   |
|                                       | California<br>(USA)<br>Loamy sand<br>(bare soil)              | 6.3 <sup>c</sup> |                 | 47.0                         | DFOP –<br>Slow phase | 47.0 <sup>f</sup>                                                               | DFOP –<br>Slow phase |
|                                       | California<br>(USA)<br>Sandy loam<br>(bare soil)              | 7.1 <sup>c</sup> |                 | 25.6                         | DFOP –<br>Slow phase | 25.6 <sup>f</sup>                                                               | DFOP –<br>Slow phase |
| <b>Tier 1 modelling endpoints</b>     |                                                               |                  |                 | <b>161.1 (max,<br/>n=12)</b> |                      | <b>0.3 (min. fast-<br/>phase, n=9) /<br/>161.1 (max. slow-<br/>phase, n=12)</b> |                      |
| <b>Tier 2 modelling<br/>endpoints</b> | <b>Geomean for soils with<br/>pH<sub>water</sub> ≤ 6.5</b>    |                  |                 | <b>70 (n=6)</b>              |                      | <b>5.0 (fast, n=4) /<br/>69.0 (slow, n=6)</b>                                   |                      |
|                                       | <b>Geomean for soils with<br/>pH<sub>water</sub> &gt; 6.5</b> |                  |                 | <b>6.2 (n=6)</b>             |                      | <b>0.88 (fast, n=5) /<br/>7.7 (slow, n=6)</b>                                   |                      |

<sup>a</sup> Normalised using a Q<sub>10</sub> of 2.58 and Walker equation coefficient of 0.7

<sup>b</sup> Calculated with equation reported in EFSA guidance 2017<sup>19</sup>:  $pH_{H_2O} = 0.982pH_{CaCl_2} + 0.648$ .

<sup>c</sup> Medium not reported, H<sub>2</sub>O assumed

<sup>d</sup> Measured in KCl in the study, converted to pH<sub>H<sub>2</sub>O</sub> considering the formula  $pH_{H_2O} = 0.860pH_{KCl} + 1.482$  presented in the EFSA guidance for predicting environmental concentration in soil (2017)

<sup>e</sup> Considered as both fast and slow phase. Value included in both the geomean of fast-phases and the geomean of slow-phases

<sup>f</sup> Derived from slow phase. Value considered in the geomean of slow-phases only

### Soil accumulation (Regulation (EU) N° 283/2013, Annex Part A, point 7.1.2.2.2 and Regulation (EU) N° 284/2013, Annex Part A, point 9.1.1.2.2)

Soil accumulation and plateau concentration

Refer to PEC<sub>accumulation</sub> calculations

### Rate of degradation in soil (anaerobic) laboratory studies active substance (Regulation (EU) N° 283/2013, Annex Part A, point 7.1.2.1.3 and Regulation (EU) N° 284/2013, Annex Part A, point 9.1.1.1)

| Parent     | Dark anaerobic conditions |                |                                         |                                          |                       |                       |
|------------|---------------------------|----------------|-----------------------------------------|------------------------------------------|-----------------------|-----------------------|
| Soil type  | pH <sup>a)</sup>          | t. °C / % MWHC | DT <sub>50</sub> / DT <sub>90</sub> (d) | DT <sub>50</sub> (d) 20 °C <sup>b)</sup> | St. (χ <sup>2</sup> ) | Method of calculation |
| Sandy loam | 5.9                       | 20°C, flooded  | > 1000                                  | -                                        | 1.6                   | DFOP                  |

<sup>a)</sup> Measured in KCl

<sup>b)</sup> Normalised using a Q<sub>10</sub> of 2.58

<sup>19</sup> EFSA (European Food Safety Authority), 2017. EFSA Guidance Document for predicting environmental concentrations of active substances of plant protection products and transformation products of these active substances in soil. EFSA Journal 2017;15(10):4982, 115 pp. <https://doi.org/10.2903/j.efsa.2017.4982>

**Rate of degradation on soil (photolysis) laboratory active substance (Regulation (EU) N° 283/2013, Annex Part A, point 7.1.1.3)**

|                |                                                                                                                           |                  |                |                                                               |                  |                                                                                                               |
|----------------|---------------------------------------------------------------------------------------------------------------------------|------------------|----------------|---------------------------------------------------------------|------------------|---------------------------------------------------------------------------------------------------------------|
| Parent         | Soil photolysis calculated values though calculated were concluded to have no meaning for the risk assessment methodology |                  |                |                                                               |                  |                                                                                                               |
| Soil type      |                                                                                                                           | pH <sup>a)</sup> | t. °C / % MWHC | DT <sub>50</sub> / DT <sub>90</sub> (d) light/dark cycle 12 h | St. ( $\chi^2$ ) | Method of calculation                                                                                         |
| Loam/silt loam |                                                                                                                           | 6.1              | 22 / air dried | 69.8 / 482                                                    | 1.2              | HS<br>k <sub>1</sub> 0.1007 k <sub>2</sub> 0.0039 tb 4.342 not corrected for degradation in the dark control. |

<sup>a)</sup>medium of measurement not stated

**Soil adsorption active substance (Regulation (EU) N° 283/2013, Annex Part A, point 7.1.3.1.1 and Regulation (EU) N° 284/2013, Annex Part A, point 9.1.2.1)**

| Glyphosate                                     |        |                         |                       |                       |                           |                       |                           |       |
|------------------------------------------------|--------|-------------------------|-----------------------|-----------------------|---------------------------|-----------------------|---------------------------|-------|
| Soil Type                                      | OC (%) | pH (CaCl <sub>2</sub> ) | pH (H <sub>2</sub> O) | K <sub>D</sub> (mL/g) | K <sub>D, OC</sub> (mL/g) | K <sub>F</sub> (mL/g) | K <sub>F, OC</sub> (mL/g) | 1/n   |
| Speyer 2.2, sandy loam                         | 1.71   | 5.6                     | 5.21                  | -                     | -                         | 59.4                  | 3476                      | 0.546 |
| RefeSol 01-A, loamy sand                       | 0.8    | 5.33                    | 6.11                  | -                     | -                         | 59.8                  | 7476                      | 0.704 |
| 18 Acres, sandy clay loam                      | 1.9    | 6.2                     | 6.11                  | -                     | -                         | 166.4                 | 8755                      | 0.579 |
| M-SL-PF (Mutchler, US), sandy clay loam        | 1.9    | 6.1                     | 6.44                  | -                     | -                         | 152.4                 | 8024                      | 0.546 |
| Speyer 2.3, sandy loam                         | 0.67   | 5.9                     | 7.02                  | -                     | -                         | 52.9                  | 7892                      | 0.751 |
| RefeSol 02-A, silt loam                        | 0.92   | 6.19                    | 6.98                  | -                     | -                         | 88.5                  | 9615                      | 0.658 |
| Gartenacker, loam                              | 2.1    | 7.1                     | 7.16                  | -                     | -                         | 21.6                  | 1031                      | 0.757 |
| Speyer 6S, clay                                | 1.78   | 7.2                     | 7.32                  | -                     | -                         | 70.5                  | 3962                      | 0.736 |
| Speyer 5M, sandy loam                          | 0.92   | 7.4                     | 7.56                  | -                     | -                         | 18.9                  | 2049                      | 0.770 |
| LAD-SL-PF (Pavillion, US), sandy loam          | 0.87   | 8.1                     | 8.11                  | -                     | -                         | 18.1                  | 2082                      | 0.777 |
| Geometric mean (if not pH dependent) (n = 10)  |        |                         |                       |                       |                           | 54.2                  | 4348                      | -     |
| Arithmetic mean (if not pH dependent) (n = 10) |        |                         |                       |                       |                           | -                     | -                         | 0.682 |
| pH dependence                                  |        |                         |                       |                       |                           |                       | No                        |       |

**Soil adsorption transformation products (Regulation (EU) N° 283/2013, Annex Part A, point 7.1.3.1.2 and Regulation (EU) N° 284/2013, Annex Part A, point 9.1.2.1)**

| AMPA                                          |        |                         |                       |                       |                           |                       |                           |       |
|-----------------------------------------------|--------|-------------------------|-----------------------|-----------------------|---------------------------|-----------------------|---------------------------|-------|
| Soil Type                                     | OC (%) | pH (CaCl <sub>2</sub> ) | pH (H <sub>2</sub> O) | K <sub>D</sub> (mL/g) | K <sub>D, OC</sub> (mL/g) | K <sub>F</sub> (mL/g) | K <sub>F, OC</sub> (mL/g) | 1/n   |
| RefeSol 02-A Silt                             | 1.18   | 6.60                    | 7.25                  | -                     | -                         | 38.9                  | 3299                      | 0.707 |
| LUFA 2.2 Sandy loam                           | 1.48   | 5.70                    | 6.33                  | -                     | -                         | 41.9                  | 2833                      | 0.752 |
| LUFA 2.3 Sandy loam                           | 0.61   | 6.20                    | 7.01                  | -                     | -                         | 28.7                  | 4709                      | 0.721 |
| LUFA 6S Clay loam                             | 2.07   | 7.30                    | 7.89                  | -                     | -                         | 36.6                  | 1769                      | 0.825 |
| Bourgfelden Silt loam                         | 1.15   | 7.50                    | 8.41                  | -                     | -                         | 23.3                  | 2032                      | 0.713 |
| Wurmwiese Sandy loam                          | 2.00   | 5.00                    | 5.20                  | -                     | -                         | 33.5                  | 1675                      | 0.875 |
| SLI Soil #4, sand                             | 1.34   | 6.9 <sup>1</sup>        | 7.4                   | -                     | -                         | 15.7                  | 1160                      | 0.752 |
| SLI Soil #5, clay loam                        | 0.93   | 7.1 <sup>1</sup>        | 7.6                   | -                     | -                         | 53.9                  | 5650                      | 0.791 |
| Geometric mean (if not pH dependent) (n = 8)  |        |                         |                       |                       |                           | 29.8                  | 2541                      | -     |
| Arithmetic mean (if not pH dependent) (n = 8) |        |                         |                       |                       |                           | -                     | -                         | 0.767 |
| pH dependence                                 |        |                         |                       |                       |                           |                       | No                        |       |

<sup>1</sup> Calculated with equation reported in EFSA guidance 2017:  $pH_{H_2O} = 0.982pH_{CaCl_2} + 0.648$ .

**Mobility in soil column leaching active substance (Regulation (EU) N° 283/2013, Annex Part A, point 7.1.4.1.1 and Regulation (EU) N° 284/2013, Annex Part A, point 9.1.2.1)**

Column leaching

No reliable column leaching study, not required

Aged residues leaching

Soil type: sand  
Aged for: 8d  
Elution (mm): 200 mm CaCl<sub>2</sub> solution over 48 h  
Leachate: ≤ 0.1 % AR glyphosate  
Soil (top 6 cm): 69.6-71.8 % AR glyphosate,  
24.2-24.9 % AR AMPA

**Mobility in soil column leaching transformation products (Regulation (EU) N° 283/2013, Annex Part A, point 7.1.4.1.2 and Regulation (EU) N° 284/2013, Annex Part A, point 9.1.2.1)**

Column leaching

No column leaching studies with metabolites submitted, not required

**Lysimeter / field leaching studies (Regulation (EU) N° 283/2013, Annex Part A, points 7.1.4.2 / 7.1.4.3 and Regulation (EU) N° 284/2013, Annex Part A, points 9.1.2.2 / 9.1.2.3)**

Lysimeter/ field leaching studies

No lysimeter or field leaching studies submitted, not required

**Hydrolytic degradation (Regulation (EU) N° 283/2013, Annex Part A, point 7.2.1.1)**

Hydrolytic degradation of the active substance and metabolites > 10 %

Stable at pH 4, 5, 7 and 9 at 50°C (also at lower temperatures)

**Aqueous photochemical degradation (Regulation (EU) N° 283/2013, Annex Part A, points 7.2.1.2 / 7.2.1.3)**

Photolytic degradation of active substance and metabolites above 10 %

Direct photolysis  
Stable in sterile distilled water (12 days of continuous irradiation) and in buffer solutions (pH 5, 7 and 9) under natural sunlight  
Degradation in aqueous solutions (pH 5.1, 7.3, 9.2):  
pH 5.1: DT<sub>50</sub> of 30.3 days at 25°C (SFO);  
pH 7.3: DT<sub>50</sub> of 55.2 days at 25°C (SFO)  
pH 9.2: DT<sub>50</sub> of 62.2 days at 25°C (SFO)  
Metabolite: AMPA (max. after 15 days):16.0 % AR (pH 5.1)

Indirect photolysis  
Degradation in natural water: DT<sub>50</sub> from 4.09 to 4.92 days (SFO) (26.4-31.7 solar days, Tokyo)  
Metabolites: AMPA (max. 19.6% AR after 12 days), methanediol (max. 52% AR after 12 days)  
methanediol is not ecotoxicologically relevant according to guidance document EFSA PPR Panel (2013)

Quantum yield of direct phototransformation in water at λ > 290 nm

No determination of the quantum yield was performed.

**‘Ready biodegradability’ (Regulation (EU) N° 283/2013, Annex Part A, point 7.2.2.1)**

Readily biodegradable (yes/no)

No

**Aerobic mineralisation in surface water (Regulation (EU) N° 283/2013, Annex Part A, point 7.2.2.2 and Regulation (EU) N° 284/2013, Annex Part A, point 9.2.1)**

| Glyphosate                                    |                |                      |                     |                                                              |                                                              |                       |                       |
|-----------------------------------------------|----------------|----------------------|---------------------|--------------------------------------------------------------|--------------------------------------------------------------|-----------------------|-----------------------|
| Suspended sediment test – natural fresh water | pH water phase | pH sed <sup>a)</sup> | t. °C <sup>b)</sup> | DT <sub>50</sub> (days) whole sys. (suspended sediment test) | DT <sub>90</sub> (days) whole sys. (suspended sediment test) | St. (χ <sup>2</sup> ) | Method of calculation |
| Calwich Abbey (10 µg/L)                       | 8.2            | 7.6                  | 20                  | 12.3                                                         | 41.0                                                         | 8.4                   | SFO                   |
| Calwich Abbey (95 µg/L)                       | 8.2            | 7.6                  | 20                  | 21.8                                                         | 72.4                                                         | 5.2                   | SFO                   |

<sup>a)</sup> Measured in water

<sup>b)</sup> study temperature



| Mineralisation and non-extractable residues (for parent dosed experiments) |                |        |                                            |                                                                           |                                                                                              |
|----------------------------------------------------------------------------|----------------|--------|--------------------------------------------|---------------------------------------------------------------------------|----------------------------------------------------------------------------------------------|
| System identifier (indicate fresh, estuarine or marine)                    | pH water phase | pH sed | Mineralisation                             | Non-extractable residues. max $x$ % after $n$ d (suspended sediment test) | Non-extractable residues. max $x$ % after $n$ d (end of the study) (suspended sediment test) |
| Calwich Abbey (10 µg/L)                                                    | 8.2            | 7.6    | 26.5 % AR after 62 days (end of the study) | 14.0 % AR after 62 days (end of the study)                                | 14.0 % AR after 62 days (end of the study)                                                   |
| Calwich Abbey (95 µg/L)                                                    | 8.2            | 7.6    | 23.1 % AR after 62 days (end of the study) | 9.1 % AR after 44 days                                                    | 8.8 % AR after 62 days (end of the study)                                                    |

**Water / sediment study (Regulation (EU) N° 283/2013, Annex Part A, point 7.2.2.3 and Regulation (EU) N° 284/2013, Annex Part A, point 9.2.2)**

***Glyphosate Trigger endpoints***

| Glyphosate              |                | Distribution: Max in sediment: 61.4 % AR after 7 days (system Unter Widdersheim) |         |                                   |                                   |                         |                |
|-------------------------|----------------|----------------------------------------------------------------------------------|---------|-----------------------------------|-----------------------------------|-------------------------|----------------|
| Water / sediment system | pH water phase | pH sed                                                                           | t. (°C) | DT <sub>50</sub> (d) <sup>1</sup> | DT <sub>90</sub> (d) <sup>1</sup> | St. ( $\chi^2$ err) (%) | Kinetic model  |
| <b>Total system</b>     |                |                                                                                  |         |                                   |                                   |                         |                |
| Cache                   | 8.2            | 8.1                                                                              | 20      | 8.4                               | 45.6                              | 2.7                     | FOMC           |
| Putah                   | 8.4            | 7.5                                                                              | 20      | 195.8                             | 902.3                             | 4.4                     | DFOP           |
| Bickenbach              | 8.6            | 7.8                                                                              | 20      | 15.8                              | 329.4                             | 2.2                     | HS             |
| Unter Widdersheim       | 8.6            | 7.68                                                                             | 20      | 121.6                             | >1000                             | 4.8                     | DFOP           |
| <b>Water phase</b>      |                |                                                                                  |         |                                   |                                   |                         |                |
| Cache                   | 8.2            | 8.1                                                                              | 20      | 5.0                               | 22.7                              | 2.3                     | DFOP           |
| Putah                   | 8.4            | 7.5                                                                              | 20      | 7.9                               | 78.2                              | 10.0                    | FOMC           |
| Bickenbach              | 8.6            | 7.8                                                                              | 20      | 2.0                               | 22.2                              | 5.2                     | DFOP           |
| Unter Widdersheim       | 8.6            | 7.68                                                                             | 20      | 1.1                               | 28.7                              | 2.6                     | DFOP           |
| <b>Sediment phase</b>   |                |                                                                                  |         |                                   |                                   |                         |                |
| Cache                   | 8.2            | 8.1                                                                              | 20      | 33.9                              | 112.6                             | 8.4                     | SFO            |
| Putah <sup>2</sup>      | 8.4            | 7.5                                                                              | 20      | – <sup>2</sup>                    | – <sup>2</sup>                    | – <sup>2</sup>          | – <sup>2</sup> |
| Bickenbach              | 8.6            | 7.8                                                                              | 20      | 158.7                             | 965.3                             | 3.6                     | DFOP           |
| Unter Widdersheim       | 8.6            | 7.68                                                                             | 20      | – <sup>3</sup>                    | – <sup>3</sup>                    | – <sup>3</sup>          | – <sup>3</sup> |

<sup>1</sup> DT<sub>50</sub> = DegT<sub>50</sub> for total system but DisT<sub>50</sub> for water and sediment phase

<sup>2</sup> No evaluation could be conducted for the sediment phase since no decline is observed.

<sup>3</sup> No reliable endpoint can be derived for the sediment phase due the scatter of the data.

**Glyphosate Modelling endpoints**

| Glyphosate             |                |                      |       |                                    |                                                                                                        |                  |
|------------------------|----------------|----------------------|-------|------------------------------------|--------------------------------------------------------------------------------------------------------|------------------|
| Total system           | pH water phase | pH sed <sup>a)</sup> | t. °C | DT <sub>50</sub> (days) whole sys. | Model                                                                                                  | St. ( $\chi^2$ ) |
| Cache                  | 8.2            | 8.1                  | 20    | 9.7                                | SFO                                                                                                    | 5.3              |
| Putah                  | 8.4            | 7.5                  | 20    | 301.4 <sup>b)</sup>                | DFOP<br>(k <sub>1</sub> : 0.6409 d <sup>-1</sup> k <sub>2</sub> : 0.0023 d <sup>-1</sup><br>g: 0.2189) | 4.4              |
| Bickenbach             | 8.6            | 7.8                  | 20    | 144.4 <sup>b)</sup>                | HS<br>(k <sub>1</sub> : 0.0439 d <sup>-1</sup> k <sub>2</sub> : 0.0048 d <sup>-1</sup><br>tb: 18.5 d)  | 2.2              |
| Unter Widdersheim      | 8.6            | 7.68                 | 20    | 1000 <sup>c)</sup>                 | DFOP                                                                                                   | 4.8              |
| Geometric mean at 20°C |                |                      |       | 143.3                              |                                                                                                        |                  |

<sup>a)</sup> Medium not reported

<sup>b)</sup> Calculated from slow phase degradation rate (k<sub>2</sub>) as 10 % of the initial amount was not reached within experimental period

<sup>c)</sup> The estimated degradation rate is not significantly different from zero, default DegT<sub>50</sub> of 1000 d to be used

**AMPA: trigger endpoints**

| <b>AMPA</b>                                | Distribution from parent-dosed experiments:<br>Max in water 15.7% AR after 14 days (system Bickenbach).<br>Max. sed 18.7 % after AR 58 days (system Cache).<br>Max in total system 27.1 % AR after 30 days (system Cache). |        |         |                |                                   |                                   |                         |                |
|--------------------------------------------|----------------------------------------------------------------------------------------------------------------------------------------------------------------------------------------------------------------------------|--------|---------|----------------|-----------------------------------|-----------------------------------|-------------------------|----------------|
|                                            | Distribution from AMPA-dosed experiments: max. in sediment 63.8% after 30 days                                                                                                                                             |        |         |                |                                   |                                   |                         |                |
| Water / sediment system                    | pH water phase                                                                                                                                                                                                             | pH sed | t. (°C) | Ffm (-)        | DT <sub>50</sub> (d) <sup>1</sup> | DT <sub>90</sub> (d) <sup>1</sup> | St. ( $\chi^2$ err) (%) | Kinetic model  |
| <b>Total system, Level P-I</b>             |                                                                                                                                                                                                                            |        |         |                |                                   |                                   |                         |                |
| Rückhaltebecken                            | 8.7                                                                                                                                                                                                                        | 7.64   | 20      | -              | 12.6                              | >1000                             | 1.6                     | FOMC           |
| Schäphysen                                 | 8.0                                                                                                                                                                                                                        | 7.34   | 20      | -              | 2.4                               | >1000                             | 6.2                     | DFOP           |
| Bickenbach                                 | 8.5                                                                                                                                                                                                                        | 8.5    | 20      | -              | 10.9                              | 175.9                             | 1.5                     | DFOP           |
| Unter Widdersheim                          | 8.5                                                                                                                                                                                                                        | 8.5    | 20      | -              | 82.2                              | 337.7                             | 2.4                     | HS             |
| Bickenbach                                 | 8.3                                                                                                                                                                                                                        | 7.4    | 20      | -              | 43.5                              | 196.8                             | 3.5                     | DFOP           |
| Unter Widdersheim                          | 8.2                                                                                                                                                                                                                        | 7.5    | 20      | -              | 17.7                              | 579.8                             | 3.4                     | HS             |
| Manningtree A                              | 7.2                                                                                                                                                                                                                        | 7.6    | 20      | -              | _ <sup>2</sup>                    | _ <sup>2</sup>                    | _ <sup>2</sup>          | _ <sup>2</sup> |
| Cache                                      | 8.2                                                                                                                                                                                                                        | 8.1    | 20      | -              | _ <sup>5</sup>                    | _ <sup>5</sup>                    | _ <sup>5</sup>          | _ <sup>5</sup> |
| Putah                                      | 8.4                                                                                                                                                                                                                        | 7.5    | 20      | -              | _ <sup>5</sup>                    | _ <sup>5</sup>                    | _ <sup>5</sup>          | _ <sup>5</sup> |
| <b>Total system, Level M-I degradation</b> |                                                                                                                                                                                                                            |        |         |                |                                   |                                   |                         |                |
| Cache <sup>5</sup>                         | 8.2                                                                                                                                                                                                                        | 8.1    | 20      | 0.339          | 172.8                             | 573.9                             | 7.0                     | SFO            |
| Putah <sup>5</sup>                         | 8.4                                                                                                                                                                                                                        | 7.5    | 20      | _ <sup>4</sup> | _ <sup>4</sup>                    | _ <sup>4</sup>                    | _ <sup>4</sup>          | _ <sup>4</sup> |
| Bickenbach                                 | 8.6                                                                                                                                                                                                                        | 7.8    | 20      | 0.488          | 15.7                              | 52.2                              | 9.4                     | SFO            |
| Unter Widdersheim                          | 8.6                                                                                                                                                                                                                        | 7.68   | 20      | 0.321          | 8.8                               | 29.2                              | 22.4                    | SFO            |
| <b>Water phase, Level P-I</b>              |                                                                                                                                                                                                                            |        |         |                |                                   |                                   |                         |                |
| Rückhaltebecken                            | 8.7                                                                                                                                                                                                                        | 7.64   | 20      | -              | 2.2                               | 22.1                              | 2.1                     | FOMC           |

|                                           |     |      |    |       |              |              |              |              |
|-------------------------------------------|-----|------|----|-------|--------------|--------------|--------------|--------------|
| Schäphysen                                | 8.0 | 7.34 | 20 | -     | 1.5          | 5.1          | 10.7         | SFO          |
| Bickenbach                                | 8.5 | 8.5  | 20 | -     | 1.8          | 31.4         | 2.0          | FOMC         |
| Unter Widdersheim                         | 8.5 | 8.5  | 20 | -     | 2.5          | 16.3         | 3.9          | DFOP         |
| Bickenbach                                | 8.3 | 7.4  | 20 | -     | 6.6          | 50.7         | 4.5          | DFOP         |
| Unter Widdersheim                         | 8.2 | 7.5  | 20 | -     | 2.0          | 17.3         | 8.2          | DFOP         |
| Manningtree A                             | 7.2 | 7.6  | 20 | -     | 0.6          | 8.1          | 1.8          | FOMC         |
| Cache                                     | 8.2 | 8.1  | 20 | -     | <sup>5</sup> | <sup>5</sup> | <sup>5</sup> | <sup>5</sup> |
| Putah                                     | 8.4 | 7.5  | 20 | -     | <sup>5</sup> | <sup>5</sup> | <sup>5</sup> | <sup>5</sup> |
| <b>Water phase, Level M-I degradation</b> |     |      |    |       |              |              |              |              |
| Cache                                     | 8.2 | 8.1  | 20 | 0.339 | 172.8        | 573.9        | 7.0          | SFO          |
| Putah                                     | 8.4 | 7.5  | 20 | -     | <sup>4</sup> | <sup>4</sup> | <sup>4</sup> | <sup>4</sup> |
| Bickenbach                                | 8.6 | 7.8  | 20 | 0.488 | 15.7         | 52.2         | 9.4          | SFO          |
| Unter Widdersheim                         | 8.6 | 7.68 | 20 | 0.321 | 8.8          | 29.2         | 22.4         | SFO          |
| <b>Sediment phase, Level P-I</b>          |     |      |    |       |              |              |              |              |
| Rückhaltebecken                           | 8.7 | 7.64 | 20 | -     | 168.1        | 558.3        | 1.9          | SFO          |
| Schäphysen                                | 8.0 | 7.34 | 20 | -     | <sup>2</sup> | <sup>2</sup> | <sup>2</sup> | <sup>2</sup> |
| Bickenbach                                | 8.5 | 8.5  | 20 | -     | <sup>2</sup> | <sup>2</sup> | <sup>2</sup> | <sup>2</sup> |
| Unter Widdersheim                         | 8.5 | 8.5  | 20 | -     | <sup>2</sup> | <sup>2</sup> | <sup>2</sup> | <sup>2</sup> |
| Bickenbach                                | 8.3 | 7.4  | 20 | -     | <sup>4</sup> | <sup>4</sup> | <sup>4</sup> | <sup>4</sup> |
| Unter Widdersheim                         | 8.2 | 7.5  | 20 | -     | <sup>2</sup> | <sup>2</sup> | <sup>2</sup> | <sup>2</sup> |
| Manningtree A                             | 7.2 | 7.6  | 20 | -     | <sup>3</sup> | <sup>3</sup> | <sup>3</sup> | <sup>3</sup> |
| Cache                                     | 8.2 | 8.1  | 20 | -     | <sup>5</sup> | <sup>5</sup> | <sup>5</sup> | <sup>5</sup> |
| Putah                                     | 8.4 | 7.5  | 20 | -     | <sup>5</sup> | <sup>5</sup> | <sup>5</sup> | <sup>5</sup> |

<sup>1</sup> DT<sub>50</sub> = DegT<sub>50</sub> for total system but DisT<sub>50</sub> for water and sediment phase

<sup>2</sup> No acceptable fits obtained and no endpoints could be derived

<sup>3</sup> No evaluations could be conducted for the sediment phase due to the limited number of data points available after the peak concentration

<sup>4</sup> No evaluations could be conducted for any compartment at Level M-I dissipation due to the limited number of data points available after the peak concentration

<sup>5</sup> No endpoint can be determined for AMPA in the water and sediment phase for both systems Cache and Putah: no decline was observed or the number of data points available after the peak concentration is too limited.

**AMPA: modelling endpoints**

| Water / sediment system                                                                  | pH water phase | pH sed | t. (°C) | Model                                                                                            | Ffm from parent (-) | SFO DT <sub>50</sub> (d) <sup>1</sup> | St. (χ <sup>2</sup> err) (%) |
|------------------------------------------------------------------------------------------|----------------|--------|---------|--------------------------------------------------------------------------------------------------|---------------------|---------------------------------------|------------------------------|
| <b>Total system, Level P-I</b>                                                           |                |        |         |                                                                                                  |                     |                                       |                              |
| Rückhaltebecken                                                                          | 8.7            | 7.64   | 20      | DFOP (k <sub>1</sub> :0.2458 d <sup>-1</sup> k <sub>2</sub> :0.0073 d <sup>-1</sup> g: 0.4858)   | -                   | 95.0 <sup>2</sup>                     | 3.8                          |
| Schäphysen                                                                               | 8.0            | 7.34   | 20      | DFOP                                                                                             | -                   | 1000 <sup>3</sup>                     | 6.2                          |
| Bickenbach                                                                               | 8.5            | 8.5    | 20      | DFOP (k <sub>1</sub> : 0.3633 d <sup>-1</sup> k <sub>2</sub> : 0.0097 d <sup>-1</sup> g: 0.4540) | -                   | 71.5 <sup>2</sup>                     | 1.5                          |
| Unter Widdersheim                                                                        | 8.5            | 8.5    | 20      | SFO                                                                                              | -                   | 80                                    | 4.8                          |
| Bickenbach                                                                               | 8.3            | 7.4    | 20      | SFO                                                                                              | -                   | 47.7                                  | 5.9                          |
| Unter Widdersheim                                                                        | 8.2            | 7.5    | 20      | HS (k <sub>1</sub> : 0.0391 d <sup>-1</sup> k <sub>2</sub> : 0.0024 d <sup>-1</sup> tb: 25.3 d)  | -                   | 288.8 <sup>2</sup>                    | 3.4                          |
| Manningtree A                                                                            | 7.2            | 7.6    | 20      | - <sup>4</sup>                                                                                   | -                   | - <sup>4</sup>                        | - <sup>4</sup>               |
| <b>Total system, Level M-I degradation</b>                                               |                |        |         |                                                                                                  |                     |                                       |                              |
| Cache                                                                                    | 8.2            | 8.1    | 20      | SFO                                                                                              | 0.339               | 172.8                                 | 7.0                          |
| Putah                                                                                    | 8.4            | 7.5    | 20      | - <sup>5</sup>                                                                                   | - <sup>5</sup>      | - <sup>5</sup>                        | - <sup>5</sup>               |
| Bickenbach                                                                               | 8.6            | 7.8    | 20      | SFO                                                                                              | 0.488               | 26.8 <sup>6</sup>                     | 7.9                          |
| Unter Widdersheim                                                                        | 8.6            | 7.68   | 20      | SFO                                                                                              | 0.321               | 15.1 <sup>6</sup>                     | 5.8                          |
| <b>Geometric mean (total system) (n = 9, derived from Level P-I and M-I degradation)</b> |                |        |         |                                                                                                  |                     | <b>93.1</b>                           |                              |

<sup>1</sup> DT<sub>50</sub> = DegT<sub>50</sub> for total system but DisT<sub>50</sub> for water and sediment phase

<sup>2</sup> Calculated from slow phase degradation rate (k<sub>2</sub>) as 10 % of the initial amount was not reached within experimental period

<sup>3</sup> The estimated degradation rate is not significantly different from zero, default DegT<sub>50</sub> of 1000 d to be used

<sup>4</sup> No acceptable fits obtained and no endpoints could be derived

<sup>5</sup> No evaluations could be conducted for any compartment at Level M-I dissipation due to the limited number of data points available after the peak concentration

<sup>6</sup> Since AMPA was not detected in sediment in the study, evaluations at Level M-I dissipation were performed for the water phase only, which are also applicable for total system

**HMPA: trigger and modelling endpoints**

| <b>Metabolite HMPA (from glyphosate dosed experiments)</b> |                                                                                                                                             |        |         |                        |                        |                        |                              |       |
|------------------------------------------------------------|---------------------------------------------------------------------------------------------------------------------------------------------|--------|---------|------------------------|------------------------|------------------------|------------------------------|-------|
| Water / sediment system                                    | <b>Distribution:</b><br>Max in water: 10.0 % AR at 61 DAT (system Bickenbach)<br>Max in total system: 10 % AR at 61 DAT (system Bickenbach) |        |         |                        |                        |                        |                              |       |
|                                                            | pH water phase                                                                                                                              | pH sed | t. (°C) | DegT <sub>50</sub> (d) | DegT <sub>90</sub> (d) | Formation fraction (-) | St. (χ <sup>2</sup> err) (%) | Model |
| <b>Total system, Level M-I degradation</b>                 |                                                                                                                                             |        |         |                        |                        |                        |                              |       |
| Bickenbach                                                 | 8.6                                                                                                                                         | 7.8    | 20      | 128.8                  | 427.8                  | 0.366 (from AMPA)      | 20.5                         | SFO   |
| Unter Widdersheim                                          | 8.6                                                                                                                                         | 7.68   | 20      | 10                     | 33.4                   | 0.359 (from AMPA)      | 39.3                         | SFO   |

**P1a**

| <b>Metabolite P1a (from AMPA dosed experiments)</b> |                                                                                                                                                                                           |
|-----------------------------------------------------|-------------------------------------------------------------------------------------------------------------------------------------------------------------------------------------------|
| <b>Water / sediment system</b>                      | <b>Distribution:</b><br>Max in sediment: 53 % AR at 14 DAT (system Manningtree A) from AMPA, minor in water.<br>Estimated to be equivalent to 14.4% on molar basis from parent glyphosate |

**M3.3**

| <b>Metabolite M3.3 (from AMPA dosed experiments)</b> |                                                                                                                                                                                                                                                                                    |
|------------------------------------------------------|------------------------------------------------------------------------------------------------------------------------------------------------------------------------------------------------------------------------------------------------------------------------------------|
| <b>Water / sediment system</b>                       | <b>Distribution:</b><br>Max in sediment: 22.9 % AR at 14 DAT (system Schaephysen) from AMPA, minor in water.<br>Estimated to be equivalent to 6.2% on molar basis from parent glyphosate (minor non transient metabolite, estimated to exceed 5% on 2 consecutive sampling points) |

| <b>Mineralisation and non extractable residues (from parent dosed experiments)</b> |                |        |                                                   |                                                    |                                                                   |
|------------------------------------------------------------------------------------|----------------|--------|---------------------------------------------------|----------------------------------------------------|-------------------------------------------------------------------|
| Water / sediment system                                                            | pH water phase | pH sed | Mineralisation x % after n d. (end of the study). | Non-extractable residues in sed. max x % after n d | Non-extractable residues in sed. x % after n d (end of the study) |
| Cache                                                                              | 8.2            | 8.1    | 48.0 AR (100 d)                                   | 13.5 AR (58 d)                                     | 13.5 AR (100 d)                                                   |
| Putah                                                                              | 8.4            | 7.5    | 5.9 AR (100 d)                                    | 20.3 AR (58 d)                                     | 16.7 AR (100 d)                                                   |
| Bickenbach                                                                         | 8.6            | 7.8    | 23.5 (100 d)                                      | 22.0 AR (100 d)                                    | 22.0 AR (100 d)                                                   |
| Unter Widdersheim                                                                  | 8.6            | 7.68   | 19.4 AR (61 d)                                    | 13.6 AR (100 d)                                    | 13.6 AR (100 d)                                                   |

**Fate and behaviour in air (Regulation (EU) N° 283/2013, Annex Part A, point 7.3.1)**

Direct photolysis in air

Photochemical oxidative degradation in air

Volatilisation

Metabolites

|                                                                                                                                                                                                                                                                                                                                                                                         |
|-----------------------------------------------------------------------------------------------------------------------------------------------------------------------------------------------------------------------------------------------------------------------------------------------------------------------------------------------------------------------------------------|
| Not studied - no data requested                                                                                                                                                                                                                                                                                                                                                         |
| Glyphosate: DT <sub>50</sub> of 1.625 hours derived by the Atkinson model (AOPWIN™ 1.92a). OH (12 h) concentration assumed = 1.5 x 10 <sup>6</sup> radicals/cm <sup>3</sup><br>Glyphosate salts: DT <sub>50</sub> values from 1.380 hours to 1.719 hours derived by the Atkinson model (AOPWIN™ 1.92). OH (12 h) concentration assumed = 1.5 x 10 <sup>6</sup> radicals/cm <sup>3</sup> |
| from plant surfaces (BBA guideline): negligible after 24 hours (n=3)                                                                                                                                                                                                                                                                                                                    |
| from soil surfaces (BBA guideline): ): negligible after 24 hours (n=2)                                                                                                                                                                                                                                                                                                                  |
| -                                                                                                                                                                                                                                                                                                                                                                                       |

**Residues requiring further assessment (Regulation (EU) N° 283/2013, Annex Part A, point 7.4.1)**

Environmental occurring residues requiring further assessment by other disciplines (toxicology and ecotoxicology) and or requiring consideration for groundwater exposure

Soil: Glyphosate, AMPA  
Surface water: Glyphosate, AMPA, HMPA  
Sediment: Glyphosate, AMPA, HMPA, M3.3, P1a  
Ground water: Glyphosate, AMPA  
Air: Glyphosate

**Definition of the residue for monitoring (Regulation (EU) N° 283/2013, Annex Part A, point 7.4.2)**

See section 5, Ecotoxicology

**Monitoring data, if available (Regulation (EU) N° 283/2013, Annex Part A, point 7.5)**

Soil (indicate location and type of study)

EU wide data from LUCAS topsoil project:  
317 samples  
Detection above LOQ: ~ 21 % of samples for glyphosate, in ~ 42 % of samples for AMPA.  
Maximum concentration 2.05 mg/kg for glyphosate (GLY) and 1.92 mg/kg for AMPA (15/20 cm depth), associated with vineyard.  
Note that the above results from different public survey and open literature review cannot be directly related to representative uses and/or other authorised good agricultural practices.

Surface water (indicate location and type of study)

Public monitoring data, EU wide  
> 308 000 samples from > 15 000 sampling sites for glyphosate  
> 270 000 samples collected from > 12 600 sampling sites for AMPA  
Detection above LOQ: ~ 37 % of samples for glyphosate, in ~ 62 % of samples for AMPA.  
Maximum concentration 3400 µg/L for GLY and 3369 µg/L for AMPA  
Note that the above results from public survey and open literature review cannot be directly related to representative uses and/or other authorised good agricultural practices.

Ground water (indicate location and type of study)

Public monitoring data, EU wide  
> 251 700 samples from > 40 000 sampling sites for glyphosate  
> 228 400 samples from > 35 900 sampling sites for AMPA  
Detection above LOQ: ~ 2 % of samples for glyphosate, in ~ 2.9 % of samples for AMPA.  
Compliance with threshold of 0.1 µg/L: > 99 % for both glyphosate and AMPA.  
Compliance with threshold of 10 µg/L: > 99.99 % for AMPA.

Maximum concentration 39.2 µg/L for GLY and 19 µg/L for AMPA

Note that the above results from public survey and open literature review cannot be directly related to representative uses and/or other authorised good agricultural practices.

Literature study (CA 7.5), on groundwater monitoring associated with railway sites in Sweden

174 samples from down gradient wells regarding groundwater flow direction, from 12 sampling locations for both glyphosate and AMPA (years: 2007 – 2019)

Detection above reporting limit: 2 % and 1% down gradient samples for glyphosate and AMPA, respectively

Compliance with threshold of 0.1 µg/L: 99 % down gradient samples for both glyphosate and AMPA

Maximum concentration: 0.25 µg/L and 0.29 µg/L in down gradient samples for glyphosate and AMPA, respectively

Note that the above results are valid for the exposure assessment for the single use pattern to railways set out in the good agricultural practice table (1 x 1.8 kg a.s./ha) and Swedish conditions monitored, but would not be representative of conditions in the whole of the EU.

Air (indicate location and type of study)

No EU wide data available

Data from FR exploratory pesticide campaign:

from June 2018 to June 2019, 381 samples on 8 sites (3 urban/peri-urban areas and 5 rural areas) with different agricultural profiles

Glyphosate quantified in 56% of the analyses (LOQ 0.009 ng/m<sup>3</sup>).

Maximum concentration for glyphosate: 1.225 ng/m<sup>3</sup>, 95th percentile concentration is 0.088 ng/m<sup>3</sup>

AMPA quantified in 1.3% of the analyses (LOQ 0.009 ng/m<sup>3</sup>)

Maximum concentration for AMPA: 0.015 ng/m<sup>3</sup>

**PEC soil (Regulation (EU) N° 284/2013, Annex Part A, points 9.1.3 / 9.3.1)**

|                       |                                                                                                                                                                                                                                                                                                                                                                                                                        |
|-----------------------|------------------------------------------------------------------------------------------------------------------------------------------------------------------------------------------------------------------------------------------------------------------------------------------------------------------------------------------------------------------------------------------------------------------------|
| Parent                | Kinetics: DFOP ( $k_1$ : 0.0551 day <sup>-1</sup> ; $k_2$ : 0.0017 day <sup>-1</sup> ; $g$ : 0.9420) ( <i>correct values for future calculations: <math>k_1</math>: 0.05519 day<sup>-1</sup>; <math>k_2</math>: 0.00151 day<sup>-1</sup>; <math>g</math>: 0.9515</i> )                                                                                                                                                 |
| Method of calculation |                                                                                                                                                                                                                                                                                                                                                                                                                        |
| Application data      | Field or Lab: representative worst case from field (Ontario site)<br>ESCAPE 2.0 (Constant climate conditions, Residues from different applications are considered separately)                                                                                                                                                                                                                                          |
|                       | Crop: all uses (risk envelope approach)<br>Depth of soil layer: 5cm (for plateau, 5 cm for railway uses and perennial crops; 5 and 20cm for field crops)<br>Soil bulk density: 1.5g/cm <sup>3</sup><br>% plant interception: no interception<br>Number of applications: 1<br>Interval (d): -<br>Application rate(s): 3600 g a.s./ha (railway uses)<br>2880 g a.s./ha (perennial crops)<br>2160 g a.s./ha (field crops) |

**3600 g a.s./ha (railway uses)**

| PEC <sub>(s)</sub><br>(mg/kg) | Single application<br>Actual     | Single application<br>Time weighted<br>average | Multiple application<br>Actual | Multiple application<br>Time weighted<br>average |
|-------------------------------|----------------------------------|------------------------------------------------|--------------------------------|--------------------------------------------------|
|                               | Initial                          | 4.800                                          |                                |                                                  |
| Plateau<br>concentration      | 0.323 mg/kg on 5 cm              |                                                |                                |                                                  |
| PECaccumulation               | 5.123 mg/kg (background on 5 cm) |                                                |                                |                                                  |

**2880 g a.s./ha (perennial crops)**

| PEC <sub>(s)</sub><br>(mg/kg) | Single application<br>Actual     | Single application<br>Time weighted<br>average | Multiple application<br>Actual | Multiple application<br>Time weighted<br>average |
|-------------------------------|----------------------------------|------------------------------------------------|--------------------------------|--------------------------------------------------|
|                               | Initial                          | 3.840                                          |                                |                                                  |
| Plateau<br>concentration      | 0.259 mg/kg on 5 cm              |                                                |                                |                                                  |
| PECaccumulation               | 4.099 mg/kg (background on 5 cm) |                                                |                                |                                                  |

**2160 g a.s./ha (field crops)**

| PEC <sub>(s)</sub><br>(mg/kg) | Single application<br>Actual                                          | Single application<br>Time weighted<br>average | Multiple application<br>Actual | Multiple application<br>Time weighted<br>average |
|-------------------------------|-----------------------------------------------------------------------|------------------------------------------------|--------------------------------|--------------------------------------------------|
|                               | Initial                                                               | 2.880                                          |                                |                                                  |
| Plateau<br>concentration      | 0.194 mg/kg on 5 cm<br>0.049 mg/kg on 20 cm                           |                                                |                                |                                                  |
| PECaccumulation               | 3.074 mg/kg (background on 5 cm)<br>2.929 mg/kg (background on 20 cm) |                                                |                                |                                                  |



|                       |                                                                                                                                                                                                                                                                                                                               |
|-----------------------|-------------------------------------------------------------------------------------------------------------------------------------------------------------------------------------------------------------------------------------------------------------------------------------------------------------------------------|
| AMPA                  | Molecular weight relative to the parent: 111.04/169.1                                                                                                                                                                                                                                                                         |
| Method of calculation | DT <sub>50</sub> (d): 1040 days<br>Kinetics: SFO<br>Field or Lab: representative worst case from laboratory<br>Max occurrence from lab and field studies: 46.9%<br>(correct value for future calculations: 48.8%)<br>ESCAPE 2.0 (Constant climate conditions, Residues from different applications are considered separately) |
| Application data      | Application rate assumed (applied as parent in ESCAPE, application rate of glyphosate corrected for molar ratio and maximum occurrence):<br>1109 g AMPA/ha (railway uses)<br>887 g AMPA/ha (uses on perennial crops)<br>665 g AMPA/ha (uses on field crops)                                                                   |

**3600 g a.s./ha (railway uses)**

| PEC <sub>(s)</sub><br>(mg/kg) | Single application<br>Actual     | Single application<br>Time weighted<br>average | Multiple application<br>Actual | Multiple application<br>Time weighted<br>average |
|-------------------------------|----------------------------------|------------------------------------------------|--------------------------------|--------------------------------------------------|
| Initial Plateau concentration | 1.478                            |                                                |                                |                                                  |
| PECaccumulation               | 5.367 mg/kg on 5 cm              |                                                |                                |                                                  |
|                               | 6.845 mg/kg (background on 5 cm) |                                                |                                |                                                  |

**2880 g a.s./ha (perennial crops)**

| PEC <sub>(s)</sub><br>(mg/kg) | Single application<br>Actual     | Single application<br>Time weighted<br>average | Multiple application<br>Actual | Multiple application<br>Time weighted<br>average |
|-------------------------------|----------------------------------|------------------------------------------------|--------------------------------|--------------------------------------------------|
| Initial Plateau concentration | 1.182                            |                                                |                                |                                                  |
| PECaccumulation               | 4.293 mg/kg on 5 cm              |                                                |                                |                                                  |
|                               | 5.476 mg/kg (background on 5 cm) |                                                |                                |                                                  |

**2160 g a.s./ha (field crops)**

| PEC <sub>(s)</sub><br>(mg/kg) | Single application<br>Actual                                          | Single application<br>Time weighted<br>average | Multiple application<br>Actual | Multiple application<br>Time weighted<br>average |
|-------------------------------|-----------------------------------------------------------------------|------------------------------------------------|--------------------------------|--------------------------------------------------|
| Initial Plateau concentration | 0.887                                                                 |                                                |                                |                                                  |
| PECaccumulation               | 3.217 mg/kg on 5 cm<br>0.804 mg/kg on 20 cm                           |                                                |                                |                                                  |
|                               | 4.104 mg/kg (background on 5 cm)<br>1.691 mg/kg (background on 20 cm) |                                                |                                |                                                  |

**PEC ground water (Regulation (EU) N° 284/2013, Annex Part A, point 9.2.4.1)**

Method of calculation and type of study (e.g. modelling, field leaching, lysimeter)

#### FOCUS Modelling

Models used: FOCUS PEARL 4.4.4, FOCUS PELMO 5.5.3; FOCUS, MACRO 5.5.4

Crops: Carrots, Potatoes, Onions, Tomatoes, Cabbage, Sugar beets, Apples, Vine, Citrus, Grass/Alfalfa

All relevant FOCUSgw scenarios simulated

#### ***Glyphosate:***

Molar mass (g/mol): 169.1

Crop uptake factor: 0

Water solubility (mg/L): 100 000 at 20 °C, 200 000 at 30 °C

Vapour pressure (Pa): PEARL:  $1.31 \times 10^{-5}$  (25 °C) / PELMO:  $6.81 \times 10^{-6}$  (20 °C) /  $2.72 \times 10^{-5}$  (30 °C)

Normalised DT<sub>50</sub>: Degradation is pH dependent and biphasic. 2 sets of simulations are performed, each including parent and metabolite.

***First set of simulations:*** DT<sub>50</sub>: 0.1d (minimum fast phase normalized DT<sub>50</sub>, from laboratory - pathway fits – and field, n=12) (*correct value for future calculations: 0.3 d*)

***Second set of simulations:*** DT<sub>50</sub>: 161.1 days (maximum slow phase normalized DT<sub>50</sub>, from laboratory - pathway fits – and field, n=12)

K<sub>OC</sub>/K<sub>om</sub> (mL/g): 4348 / 2522 (geometric mean, n = 10)

1/n: 0.682 (arithmetic mean, n = 10)

*Should a refinement be needed, recommended DT50 for glyphosate for Tier 2 PECgw calculations are:*

Pathway fit when glyphosate is simulated along with AMPA):

Soil pH<sub>water</sub> ≤ 6.5: DT<sub>50</sub> 5.0 d (geomean of fast phase, n=4), DT<sub>50</sub> 69.0 d (geomean of slow phase, n=6)

Soil pH<sub>water</sub> > 6.5: DT<sub>50</sub> 0.88 d, (geomean of fast phase, n=5), DT<sub>50</sub> 7.7 d (geomean of slow phase, n=6)

Parent only fits (when AMPA is not simulated):

Soil pH<sub>water</sub> ≤ 6.5: DT<sub>50</sub> 70.0 d (geomean, n=6)

Soil pH<sub>water</sub> > 6.5: DT<sub>50</sub> 6.2 d (geomean, n=6)

#### ***AMPA***

Molar mass (g/mol): 111.04

Crop uptake factor: 0

Water solubility (mg/L): 100 000 at 20 °C (parent data)

Vapour pressure (Pa):  $1.31 \times 10^{-5}$  (25 °C) (parent data)

Normalized DT<sub>50</sub>: 1040 d (max laboratory normalized DT50, SFO, n=10, to take into account pH-dependence)

K<sub>OC</sub>/K<sub>om</sub> (mL/g): 2541 / 1474 (geometric mean, n = 8)

1/n: 0.767 (arithmetic mean, n = 8)

Formation fraction : 0.290 from glyphosate (mean laboratory studies, n=7) (*correct value for future calculations: 0.2625, n=6*)

*Should a refinement be needed, recommended degradation parameters for AMPA for Tier 2 PECgw calculations are:*

Soil pH<sub>water</sub> ≤ 6.5: DT<sub>50</sub> 663 d (geomean, n=4)

Soil pH<sub>water</sub> > 6.5: DT<sub>50</sub> 43.0 d (geomean, n=5)

fm: 0.263 (arithmetic mean, n=6)

Modelling for application to railways:

Model used: HardSPEC 1.4.3.2

***Glyphosate:***

Molar mass (g/mol): 169.1

Water solubility (mg/L): 100 000

Soil DT<sub>50</sub>: 161.1 days (max normalized DT50 from parent-only fits, n=12, to take into account pH-dependence)

K<sub>OC</sub>/K<sub>om</sub> (mL/g): 4348 / 2522 (geometric mean, n = 10)

*Should a refinement be needed, recommended DT50 (from parent-only fits) for glyphosate for Tier 2 PECgw calculations are:*

Soil pH<sub>water</sub> ≤ 6.5: DT<sub>50</sub> 70.0 d (geomean, n=6)

Soil pH<sub>water</sub> > 6.5: DT<sub>50</sub> 6.2 d (geomean, n=6)

***Metabolite AMPA:***

Molar mass (g/mol): 111.04

Water solubility (mg/L): 100 000 (parent data)

Soil DT<sub>50</sub>: 1040 (max laboratory normalized DT50, n=10, to take into account pH-dependence)

K<sub>OC</sub>/K<sub>om</sub> (mL/g): 2541 / 1474 (geometric mean, n = 8)

*Should a refinement be needed, recommended DT50 for AMPA for Tier 2 PECgw calculations are:*

Soil pH<sub>water</sub> ≤ 6.5: DT<sub>50</sub> 663 d (geomean, n=4)

Soil pH<sub>water</sub> > 6.5: DT<sub>50</sub> 43.0 d (geomean, n=5)

Application rate

FOCUS calculations

Gross application rate:

Carrots, Potatoes, Onions, Tomatoes, Cabbage, Sugar beets: 540, 720, 1440 and 2160 g/ha

- Apples, Vine, Citrus: 720, 1440 and 2880 g/ha

- Grass/Alfalfa: 1800 g/ha

Canopy interception 0 %:

No. of applications: 1

Time of application (absolute or relative application dates):

|                                                                                                                                                                                                                                                                                |
|--------------------------------------------------------------------------------------------------------------------------------------------------------------------------------------------------------------------------------------------------------------------------------|
| <ul style="list-style-type: none"> <li>- Carrots, Potatoes, Onions, Tomatoes, Cabbage, Sugar beets: 20 days before emergence (early app.), 7 days after harvest (late app.)</li> <li>- Apples, Vine, Citrus, Grass/Alfalfa: 01-Apr (early app.), 01-Oct (late app.)</li> </ul> |
| <p><u>HardSPEC calculations:</u></p> <p>Gross application rate (g a.s./ha): 3600</p> <p>For AMPA, parent rate was corrected for molecular ratio only (2364 g AMPA/ha)</p>                                                                                                      |

### FOCUS calculations

#### PEC<sub>gw</sub> of glyphosate and AMPA (FOCUS PEARL, FOCUS PELMO, FOCUS MACRO)

| Crop                                             | Scenario                      | Glyphosate (µg/L)        |                                 |                                 | AMPA (µg/L) |        |
|--------------------------------------------------|-------------------------------|--------------------------|---------------------------------|---------------------------------|-------------|--------|
|                                                  |                               | Slow:<br>DT50 = 161 days | Slow: parent<br>DT50 = 161 days | Fast: parent<br>DT50 = 0.1 days |             |        |
| All relevant FOCUS crops<br>(1 × 720 g a.s./ha)  | All relevant FOCUS scenarios* | <0.001                   | <0.001                          | <0.001                          | <0.001      | <0.001 |
| All relevant FOCUS crops<br>(1 × 1440 g a.s./ha) | All relevant FOCUS scenarios* | <0.001                   | <0.001                          | <0.001                          | <0.001      | <0.001 |
| All relevant FOCUS crops<br>(1 × 540 g a.s./ha)  | All relevant FOCUS scenarios* | <0.001                   | <0.001                          | <0.001                          | <0.001      | <0.001 |
| All relevant FOCUS crops<br>(1 × 2160 g a.s./ha) | All relevant FOCUS scenarios* | <0.001                   | <0.001                          | <0.001                          | <0.001      | <0.001 |
| All relevant FOCUS crops<br>(1 × 2880 g a.s./ha) | All relevant FOCUS scenarios* | <0.001                   | <0.001                          | <0.001                          | <0.001      | <0.001 |
| All relevant FOCUS crops<br>(1 × 1800 g a.s./ha) | All relevant FOCUS scenarios* | <0.001                   | <0.001                          | <0.001                          | <0.001      | <0.001 |

\* Chateaudun only for FOCUS MACRO; Citrus was not simulated in FOCUS MACRO since the scenario Châteaudun is not defined for this crop

### HardSPEC calculations

#### PECgw of glyphosate and AMPA – 1 x 3600 g/ha on railways

|                                                                                       | Glyphosate                            |           |           | AMPA  |           |           |
|---------------------------------------------------------------------------------------|---------------------------------------|-----------|-----------|-------|-----------|-----------|
| Average annual concentration at the base of the railway formation ( $\mu\text{g/L}$ ) | 0.01                                  |           |           | 0.01  |           |           |
|                                                                                       | Exposure at the abstraction well-head |           |           |       |           |           |
|                                                                                       | Glyphosate                            |           |           | AMPA  |           |           |
|                                                                                       | Chalk                                 | Limestone | Sandstone | Chalk | Limestone | Sandstone |
| Max. concentration in well ( $\mu\text{g/L}$ )                                        | <0.001                                | <0.001    | <0.001    | 0.028 | 0.006     | 0.007     |
| Period when plume in well >0.1 $\mu\text{g/L}$ (d)                                    | 0                                     | 0         | 0         | 0     | 0         | 0         |

#### PEC surface water and PEC sediment (Regulation (EU) N° 284/2013, Annex Part A, points 9.2.5 / 9.3.1)

##### FOCUS calculations

FOCUSsw step 1 and 2

Parent

Parameters used in FOCUSsw step 1 and 2

Version control no. of FOCUS calculator: FOCUS Step 1-2 v. 3.2 (used for parent and metabolites)

Molecular weight (g/mol): 169.1

$K_{OC}/K_{OM}$  (mL/g): 4348 / 2522 (geometric mean, n = 10)

$DT_{50}$  soil (d): 161.1 days (maximum modelling normalized  $DT_{50}$ , from laboratory – parent-only fits - and field, n = 12, to take into account pH-dependence)

$DT_{50}$  water/sediment/system (d): 143.3 (geometric mean, total system, n = 4)

Parameters used in FOCUSsw step 3 (if performed)

Version control no.'s of FOCUS software: FOCUS SWASH 5.3, SPIN 2.2, FOCUS MACRO 5.5.4, FOCUS PRZM 4.3.1, FOCUS TOXSWA 5.5.3

Water solubility (mg/L): 100 000 (20°C)

Vapour pressure (Pa):  $1.31 \times 10^{-5}$  (25 °C)

$K_{OC}/K_{OM}$  (mL/g): 4348 / 2522 (geometric mean, n = 10)

1/n: 0.682 (arith. mean, n = 10)

$DT_{50}$  soil (d): 161.1 days (maximum modelling normalized  $DT_{50}$ , from laboratory – parent-only fits - and field, n = 12, to take into account pH-dependence)

$DT_{50}$  water (d): 1000 (FOCUS default)

$DT_{50}$  sediment (d): 143.3 (geometric mean, total system, n = 4)

Q10=2.58, Walker equation coefficient 0.7

Crop uptake factor: 0

Application rate

*Should a refinement be needed, recommended soil DT50 for glyphosate for Tier 2 PEC<sub>sw</sub> calculations are:*

Pathway fit (when glyphosate is simulated along with AMPA):

Soil pH<sub>water</sub> ≤ 6.5: DT<sub>50</sub> 5.0 d (geomean of fast-phase, n=4), DT<sub>50</sub> 69.0 d (geomean of slow phase, n=6)

Soil pH<sub>water</sub> > 6.5: DT<sub>50</sub> 0.88 d, (geomean of fast phase, n=5), DT<sub>50</sub> 7.7 d (geomean of slow phase, n=6)

Parent only fits (when AMPA is not simulated):

Soil pH<sub>water</sub> ≤ 6.5: DT<sub>50</sub> 70.0 d (geomean, n=6)

Soil pH<sub>water</sub> > 6.5: DT<sub>50</sub> 6.2 d (geomean, n=6)

Crop and growth stage: Root vegetable, Potatoes, Bulb vegetable, Fruiting vegetable, Leafy vegetable, Sugar beet

Application rate(s): 1x540, 3x720, 2x1080, 1x1440 g a.s./ha

Interval (d): 28

Crop interception (%) :

- Step 2: no interception
- Step 3: groundspray, CAM 1 for R scenarios, interception set to 0 for D scenarios

Application window:

- Step 2: Northern and Southern Europe, Mar-May, Jun-Sept, Oct-Feb

Step 3: end of application window 20 days before emergence (early app.), start of application window 7 d after harvest (late app.)

Crop and growth stage: Pome/stone fruits, Olives, Vines (Grass/Alfalfa was used as surrogate crop in Step 2 to account for low drift - groundspray application)

Application rate(s): 3x720, 2x1440 g a.s./ha

Interval (d): 28

Crop interception (%) :

- Step 2: no interception
- Step 3: airblast, CAM 1 for R scenarios, interception set to 0 for D scenarios

Step 3: Drift manually adjusted to reflect groundspray application

Application window:

- Step 2: Northern and Southern Europe, Mar-May, Jun-Sept, Oct-Feb
- Step 3: start of application window 15-Mar (early app.), start of application window 15-Sep (late app.)

Crop and growth stage: Grass/Alfalfa

Application rate(s): 1x1800 g a.s./ha

Interval (d): -

Crop interception (%) :

|                                                                                                                                                                                                                                                                                                                                                                                                                                             |
|---------------------------------------------------------------------------------------------------------------------------------------------------------------------------------------------------------------------------------------------------------------------------------------------------------------------------------------------------------------------------------------------------------------------------------------------|
| <ul style="list-style-type: none"> <li>- Step 2: no interception</li> <li>- Step 3: groundspray, CAM 1 for R scenarios, interception set to 0 for D scenarios</li> </ul> <p>Application window:</p> <ul style="list-style-type: none"> <li>- Step 2: Northern and Southern Europe, Mar-May, Jun-Sept, Oct-Feb</li> <li>- Step 3: start of application window 15-Mar (early app.), start of application window 15-Sep (late app.)</li> </ul> |
| -                                                                                                                                                                                                                                                                                                                                                                                                                                           |

**FOCUS Step 1, 2, and 3 PEC<sub>sw</sub> and PEC<sub>sed</sub> for glyphosate following application to vegetables, root, early application (1 × 720 g a.s./ha)**

| Scenario FOCUS  | Period/ Waterbody      | Max PEC <sub>sw</sub> (µg/L) | Dominant entry route | Max PEC <sub>sed</sub> (µg/kg) |
|-----------------|------------------------|------------------------------|----------------------|--------------------------------|
| Step 1          |                        |                              |                      |                                |
| -               | -                      | 41.930                       | -                    | 1570.000                       |
| Step 2          |                        |                              |                      |                                |
| Northern Europe | Mar-May                | 8.310                        | -                    | 341.678                        |
| Northern Europe | Jun-Sep                | 8.310                        | -                    | 341.678                        |
| Northern Europe | Oct-Feb                | 18.721                       | -                    | 792.933                        |
| Southern Europe | Mar-May                | 15.251                       | -                    | 642.035                        |
| Southern Europe | Jun-Sep                | 11.780                       | -                    | 491.846                        |
| Southern Europe | Oct-Feb                | 15.251                       | -                    | 642.035                        |
| Step 3          |                        |                              |                      |                                |
| D3              | Ditch                  | 4.470                        | Drift                | 2.920                          |
| D6              | Ditch                  | 4.435                        | Drift                | 1.724                          |
| R1              | Pond                   | 0.163                        | Runoff               | 11.840                         |
| R1              | Stream                 | 2.954                        | Drift                | 80.070                         |
| R2              | Stream                 | 3.867                        | Drift                | 692.400                        |
| R2              | Stream 2 <sup>nd</sup> | 3.969                        | Drift                | 548.800                        |
| R3              | Stream                 | 4.175                        | Drift                | 117.900                        |
| R4              | Stream                 | 2.918                        | Drift                | 50.870                         |

**FOCUS Step 1, 2, and 3 PEC<sub>sw</sub> and PEC<sub>sed</sub> for glyphosate following application to vegetables, root, early application (3 × 720 g a.s./ha, with application interval of 28 days)**

| Scenario FOCUS  | Period/ Waterbody      | Max PEC <sub>sw</sub> (µg/L) | Dominant entry route | Max PEC <sub>sed</sub> (µg/kg) |
|-----------------|------------------------|------------------------------|----------------------|--------------------------------|
| Step 1          |                        |                              |                      |                                |
| -               | -                      | 125.789                      | -                    | 4710.000                       |
| Step 2          |                        |                              |                      |                                |
| Northern Europe | Mar-May                | 21.153                       | -                    | 882.486                        |
| Northern Europe | Jun-Sep                | 21.153                       | -                    | 882.486                        |
| Northern Europe | Oct-Feb                | 48.975                       | -                    | 2090.000                       |
| Southern Europe | Mar-May                | 39.701                       | -                    | 1690.000                       |
| Southern Europe | Jun-Sep                | 30.427                       | -                    | 1280.000                       |
| Southern Europe | Oct-Feb                | 39.701                       | -                    | 1690.000                       |
| Step 3          |                        |                              |                      |                                |
| D3              | Ditch                  | 3.256                        | Drift                | 4.735                          |
| D6              | Ditch                  | 3.285                        | Drift                | 10.560                         |
| R1              | Pond                   | 1.107                        | Runoff               | 44.060                         |
| R1              | Stream                 | 4.091                        | Runoff               | 271.300                        |
| R2              | Stream                 | 2.834                        | Drift                | 1953.500                       |
| R2              | Stream 2 <sup>nd</sup> | 2.881                        | Drift                | 982.900                        |
| R3              | Stream                 | 3.113                        | Runoff               | 398.300                        |
| R4              | Stream                 | 5.530                        | Runoff               | 143.200                        |

**FOCUS Step 1, 2, and 3 PEC<sub>sw</sub> and PEC<sub>sed</sub> for glyphosate following application to vegetables, root, late application (1 × 720 g a.s./ha)**

| Scenario FOCUS  | Period/ Waterbody      | Max PEC <sub>sw</sub> (µg/L) | Dominant entry route | Max PEC <sub>sed</sub> (µg/kg) |
|-----------------|------------------------|------------------------------|----------------------|--------------------------------|
| Step 1          |                        |                              |                      |                                |
| -               | -                      | 41.930                       | -                    | 1570.000                       |
| Step 2          |                        |                              |                      |                                |
| Northern Europe | Mar-May                | 8.310                        | -                    | 341.678                        |
| Northern Europe | Jun-Sep                | 8.310                        | -                    | 341.678                        |
| Northern Europe | Oct-Feb                | 18.721                       | -                    | 792.933                        |
| Southern Europe | Mar-May                | 15.251                       | -                    | 642.035                        |
| Southern Europe | Jun-Sep                | 11.780                       | -                    | 491.846                        |
| Southern Europe | Oct-Feb                | 15.251                       | -                    | 642.035                        |
| Step 3          |                        |                              |                      |                                |
| D3              | Ditch                  | 4.487                        | Drift                | 4.157                          |
| D6              | Ditch                  | 4.498                        | Drift                | 7.012                          |
| R1              | Pond                   | 0.403                        | Runoff               | 19.760                         |
| R1              | Stream                 | 2.955                        | Drift                | 156.200                        |
| R2              | Stream                 | 3.969                        | Drift                | 548.400                        |
| R2              | Stream 2 <sup>nd</sup> | 3.923                        | Drift                | 757.800                        |
| R3              | Stream                 | 4.175                        | Drift                | 85.760                         |
| R4              | Stream                 | 2.904                        | Drift                | 238.200                        |

**FOCUS Step 1, 2, and 3 PEC<sub>sw</sub> and PEC<sub>sed</sub> for glyphosate following application to vegetables, root, late application (3 × 720 g a.s./ha, with application interval of 28 days)**

| Scenario FOCUS  | Period/ Waterbody      | Max PEC <sub>sw</sub> (µg/L) | Dominant entry route | Max PEC <sub>sed</sub> (µg/kg) |
|-----------------|------------------------|------------------------------|----------------------|--------------------------------|
| Step 1          |                        |                              |                      |                                |
| -               | -                      | 125.789                      | -                    | 4710.000                       |
| Step 2          |                        |                              |                      |                                |
| Northern Europe | Mar-May                | 21.153                       | -                    | 882.486                        |
| Northern Europe | Jun-Sep                | 21.153                       | -                    | 882.486                        |
| Northern Europe | Oct-Feb                | 48.975                       | -                    | 2090.000                       |
| Southern Europe | Mar-May                | 39.701                       | -                    | 1690.000                       |
| Southern Europe | Jun-Sep                | 30.427                       | -                    | 1280.000                       |
| Southern Europe | Oct-Feb                | 39.701                       | -                    | 1690.000                       |
| Step 3          |                        |                              |                      |                                |
| D3              | Ditch                  | 3.265                        | Drift                | 4.984                          |
| D6              | Ditch                  | 3.339                        | Drift                | 22.470                         |
| R1              | Pond                   | 1.921                        | Runoff               | 70.280                         |
| R1              | Stream                 | 3.785                        | Runoff               | 417.900                        |
| R2              | Stream                 | 2.874                        | Drift                | 1746.200                       |
| R2              | Stream 2 <sup>nd</sup> | 2.840                        | Drift                | 2133.100                       |
| R3              | Stream                 | 3.024                        | Drift                | 287.000                        |
| R4              | Stream                 | 4.687                        | Runoff               | 696.400                        |

**FOCUS Step 1, 2, and 3 PEC<sub>sw</sub> and PEC<sub>sed</sub> for glyphosate following application to potatoes, early application (1 × 720 g a.s./ha)**

| Scenario FOCUS  | Period/ Waterbody | Max PEC <sub>sw</sub> (µg/L) | Dominant entry route | Max PEC <sub>sed</sub> (µg/kg) |
|-----------------|-------------------|------------------------------|----------------------|--------------------------------|
| Step 1          |                   |                              |                      |                                |
| -               | -                 | 41.930                       | -                    | 1570.000                       |
| Step 2          |                   |                              |                      |                                |
| Northern Europe | Mar-May           | 8.310                        | -                    | 341.678                        |
| Northern Europe | Jun-Sep           | 8.310                        | -                    | 341.678                        |
| Northern Europe | Oct-Feb           | 18.721                       | -                    | 792.933                        |
| Southern Europe | Mar-May           | 15.251                       | -                    | 642.035                        |



|                 |                       |        |        |         |
|-----------------|-----------------------|--------|--------|---------|
| Southern Europe | Jun-Sep               | 11.780 | -      | 491.846 |
| Southern Europe | Oct-Feb               | 15.251 | -      | 642.035 |
| Step 3          |                       |        |        |         |
| D3              | Ditch                 | 3.696  | Drift  | 2.559   |
| D4              | Pond                  | 0.144  | Drift  | 2.289   |
| D4              | Stream                | 2.958  | Drift  | 0.107   |
| D6              | Ditch                 | 3.656  | Drift  | 1.242   |
| D6              | Ditch 2 <sup>nd</sup> | 3.678  | Drift  | 1.696   |
| R1              | Pond                  | 0.164  | Runoff | 11.460  |
| R1              | Stream                | 2.560  | Drift  | 78.060  |
| R2              | Stream                | 3.309  | Drift  | 812.300 |
| R3              | Stream                | 3.619  | Drift  | 87.340  |

**FOCUS Step 1, 2, and 3 PEC<sub>sw</sub> and PEC<sub>sed</sub> for glyphosate following application to potatoes, early application (3 × 720 g a.s./ha, with application interval of 28 days)**

| Scenario FOCUS  | Period/ Waterbody     | Max PEC <sub>sw</sub> (µg/L) | Dominant entry route | Max PEC <sub>sed</sub> (µg/kg) |
|-----------------|-----------------------|------------------------------|----------------------|--------------------------------|
| Step 1          |                       |                              |                      |                                |
| -               | -                     | 125.789                      | -                    | 4710.000                       |
| Step 2          |                       |                              |                      |                                |
| Northern Europe | Mar-May               | 21.153                       | -                    | 882.486                        |
| Northern Europe | Jun-Sep               | 21.153                       | -                    | 882.486                        |
| Northern Europe | Oct-Feb               | 48.975                       | -                    | 2090.000                       |
| Southern Europe | Mar-May               | 39.701                       | -                    | 1690.000                       |
| Southern Europe | Jun-Sep               | 30.427                       | -                    | 1280.000                       |
| Southern Europe | Oct-Feb               | 39.701                       | -                    | 1690.000                       |
| Step 3          |                       |                              |                      |                                |
| D3              | Ditch                 | 2.680                        | Drift                | 3.925                          |
| D4              | Pond                  | 0.156                        | Drift                | 4.577                          |
| D4              | Stream                | 2.242                        | Drift                | 0.408                          |
| D6              | Ditch                 | 2.686                        | Drift                | 3.967                          |
| D6              | Ditch 2 <sup>nd</sup> | 2.666                        | Drift                | 2.637                          |
| R1              | Pond                  | 1.127                        | Runoff               | 46.840                         |
| R1              | Stream                | 3.832                        | Runoff               | 291.900                        |
| R2              | Stream                | 2.422                        | Drift                | 1865.200                       |
| R3              | Stream                | 2.837                        | Runoff               | 190.500                        |

**FOCUS Step 1, 2, and 3 PEC<sub>sw</sub> and PEC<sub>sed</sub> for glyphosate following application to potatoes, late application (1 × 720 g a.s./ha)**

| Scenario FOCUS  | Period/ Waterbody     | Max PEC <sub>sw</sub> (µg/L) | Dominant entry route | Max PEC <sub>sed</sub> (µg/kg) |
|-----------------|-----------------------|------------------------------|----------------------|--------------------------------|
| Step 1          |                       |                              |                      |                                |
| -               | -                     | 41.930                       | -                    | 1570.000                       |
| Step 2          |                       |                              |                      |                                |
| Northern Europe | Mar-May               | 8.310                        | -                    | 341.678                        |
| Northern Europe | Jun-Sep               | 8.310                        | -                    | 341.678                        |
| Northern Europe | Oct-Feb               | 18.721                       | -                    | 792.933                        |
| Southern Europe | Mar-May               | 15.251                       | -                    | 642.035                        |
| Southern Europe | Jun-Sep               | 11.780                       | -                    | 491.846                        |
| Southern Europe | Oct-Feb               | 15.251                       | -                    | 642.035                        |
| Step 3          |                       |                              |                      |                                |
| D3              | Ditch                 | 3.694                        | Drift                | 2.419                          |
| D4              | Pond                  | 0.144                        | Drift                | 2.516                          |
| D4              | Stream                | 3.144                        | Drift                | 0.208                          |
| D6              | Ditch                 | 3.722                        | Drift                | 7.772                          |
| D6              | Ditch 2 <sup>nd</sup> | 3.733                        | Drift                | 13.850                         |
| R1              | Pond                  | 0.470                        | Runoff               | 23.210                         |
| R1              | Stream                | 2.562                        | Drift                | 181.700                        |

|    |        |       |       |         |
|----|--------|-------|-------|---------|
| R2 | Stream | 3.441 | Drift | 642.100 |
| R3 | Stream | 3.613 | Drift | 366.100 |

**FOCUS Step 1, 2, and 3 PEC<sub>sw</sub> and PEC<sub>sed</sub> for glyphosate following application to potatoes, late application (3 × 720 g a.s./ha, with application interval of 28 days)**

| Scenario FOCUS  | Period/ Waterbody     | Max PEC <sub>sw</sub> (µg/L) | Dominant entry route | Max PEC <sub>sed</sub> (µg/kg) |
|-----------------|-----------------------|------------------------------|----------------------|--------------------------------|
| Step 1          |                       |                              |                      |                                |
| -               | -                     | 125.789                      | -                    | 4710.000                       |
| Step 2          |                       |                              |                      |                                |
| Northern Europe | Mar-May               | 21.153                       | -                    | 882.486                        |
| Northern Europe | Jun-Sep               | 21.153                       | -                    | 882.486                        |
| Northern Europe | Oct-Feb               | 48.975                       | -                    | 2090.000                       |
| Southern Europe | Mar-May               | 39.701                       | -                    | 1690.000                       |
| Southern Europe | Jun-Sep               | 30.427                       | -                    | 1280.000                       |
| Southern Europe | Oct-Feb               | 39.701                       | -                    | 1690.000                       |
| Step 3          |                       |                              |                      |                                |
| D3              | Ditch                 | 2.678                        | Drift                | 3.583                          |
| D4              | Pond                  | 0.190                        | Drainage             | 5.638                          |
| D4              | Stream                | 2.315                        | Drift                | 0.817                          |
| D6              | Ditch                 | 2.698                        | Drift                | 5.663                          |
| D6              | Ditch 2 <sup>nd</sup> | 2.706                        | Drift                | 10.120                         |
| R1              | Pond                  | 2.168                        | Runoff               | 80.510                         |
| R1              | Stream                | 4.241                        | Runoff               | 486.300                        |
| R2              | Stream                | 2.483                        | Drift                | 1854.600                       |
| R3              | Stream                | 2.608                        | Drift                | 938.400                        |

**FOCUS Step 1, 2, and 3 PEC<sub>sw</sub> and PEC<sub>sed</sub> for glyphosate following application to vegetables, bulb, early application (1 × 720 g a.s./ha)**

| Scenario FOCUS  | Period/ Waterbody     | Max PEC <sub>sw</sub> (µg/L) | Dominant entry route | Max PEC <sub>sed</sub> (µg/kg) |
|-----------------|-----------------------|------------------------------|----------------------|--------------------------------|
| Step 1          |                       |                              |                      |                                |
| -               | -                     | 41.930                       | -                    | 1570.000                       |
| Step 2          |                       |                              |                      |                                |
| Northern Europe | Mar-May               | 8.310                        | -                    | 341.678                        |
| Northern Europe | Jun-Sep               | 8.310                        | -                    | 341.678                        |
| Northern Europe | Oct-Feb               | 18.721                       | -                    | 792.933                        |
| Southern Europe | Mar-May               | 15.251                       | -                    | 642.035                        |
| Southern Europe | Jun-Sep               | 11.780                       | -                    | 491.846                        |
| Southern Europe | Oct-Feb               | 15.251                       | -                    | 642.035                        |
| Step 3          |                       |                              |                      |                                |
| D3              | Ditch                 | 4.470                        | Drift                | 2.922                          |
| D4              | Pond                  | 0.149                        | Drift                | 2.356                          |
| D4              | Stream                | 3.265                        | Drift                | 0.091                          |
| D6              | Ditch                 | 4.465                        | Drift                | 2.577                          |
| D6              | Ditch 2 <sup>nd</sup> | 4.518                        | Drift                | 16.130                         |
| R1              | Pond                  | 0.165                        | Runoff               | 11.990                         |
| R1              | Stream                | 2.953                        | Drift                | 82.610                         |
| R2              | Stream                | 3.867                        | Drift                | 695.300                        |
| R3              | Stream                | 4.174                        | Drift                | 108.400                        |
| R4              | Stream                | 2.917                        | Drift                | 50.810                         |

**FOCUS Step 1, 2, and 3 PEC<sub>sw</sub> and PEC<sub>sed</sub> for glyphosate following application to vegetables, bulb, early application (3 × 720 g a.s./ha, with application interval of 28 days)**

| Scenario FOCUS  | Period/ Waterbody     | Max PEC <sub>sw</sub> (µg/L) | Dominant entry route | Max PEC <sub>sed</sub> (µg/kg) |
|-----------------|-----------------------|------------------------------|----------------------|--------------------------------|
| Step 1          |                       |                              |                      |                                |
| -               | -                     | 125.789                      | -                    | 4710.000                       |
| Step 2          |                       |                              |                      |                                |
| Northern Europe | Mar-May               | 21.153                       | -                    | 882.486                        |
| Northern Europe | Jun-Sep               | 21.153                       | -                    | 882.486                        |
| Northern Europe | Oct-Feb               | 48.975                       | -                    | 2090.000                       |
| Southern Europe | Mar-May               | 39.701                       | -                    | 1690.000                       |
| Southern Europe | Jun-Sep               | 30.427                       | -                    | 1280.000                       |
| Southern Europe | Oct-Feb               | 39.701                       | -                    | 1690.000                       |
| Step 3          |                       |                              |                      |                                |
| D3              | Ditch                 | 3.256                        | Drift                | 4.737                          |
| D4              | Pond                  | 0.149                        | Drift                | 4.813                          |
| D4              | Stream                | 2.505                        | Drift                | 0.428                          |
| D6              | Ditch                 | 3.249                        | Drift                | 3.300                          |
| D6              | Ditch 2 <sup>nd</sup> | 3.356                        | Drift                | 25.580                         |
| R1              | Pond                  | 1.117                        | Runoff               | 44.590                         |
| R1              | Stream                | 4.108                        | Runoff               | 271.500                        |
| R2              | Stream                | 2.833                        | Drift                | 1954.600                       |
| R3              | Stream                | 3.040                        | Runoff               | 392.100                        |
| R4              | Stream                | 5.480                        | Runoff               | 142.400                        |

**FOCUS Step 1, 2, and 3 PEC<sub>sw</sub> and PEC<sub>sed</sub> for glyphosate following application to vegetables, bulb, late application (1 × 720 g a.s./ha)**

| Scenario FOCUS  | Period/ Waterbody     | Max PEC <sub>sw</sub> (µg/L) | Dominant entry route | Max PEC <sub>sed</sub> (µg/kg) |
|-----------------|-----------------------|------------------------------|----------------------|--------------------------------|
| Step 1          |                       |                              |                      |                                |
| -               | -                     | 41.930                       | -                    | 1570.000                       |
| Step 2          |                       |                              |                      |                                |
| Northern Europe | Mar-May               | 8.310                        | -                    | 341.678                        |
| Northern Europe | Jun-Sep               | 8.310                        | -                    | 341.678                        |
| Northern Europe | Oct-Feb               | 18.721                       | -                    | 792.933                        |
| Southern Europe | Mar-May               | 15.251                       | -                    | 642.035                        |
| Southern Europe | Jun-Sep               | 11.780                       | -                    | 491.846                        |
| Southern Europe | Oct-Feb               | 15.251                       | -                    | 642.035                        |
| Step 3          |                       |                              |                      |                                |
| D3              | Ditch                 | 4.468                        | Drift                | 2.767                          |
| D4              | Pond                  | 0.149                        | Drift                | 2.582                          |
| D4              | Stream                | 3.534                        | Drift                | 0.191                          |
| D6              | Ditch                 | 4.518                        | Drift                | 15.930                         |
| D6              | Ditch 2 <sup>nd</sup> | 4.382                        | Drift                | 0.939                          |
| R1              | Pond                  | 0.451                        | Runoff               | 22.050                         |
| R1              | Stream                | 2.955                        | Drift                | 180.700                        |
| R2              | Stream                | 3.969                        | Drift                | 527.700                        |
| R3              | Stream                | 4.168                        | Drift                | 156.500                        |
| R4              | Stream                | 2.955                        | Drift                | 162.900                        |

**FOCUS Step 1, 2, and 3 PEC<sub>sw</sub> and PEC<sub>sed</sub> for glyphosate following application to vegetables, bulb, late application (3 × 720 g a.s./ha, with application interval of 28 days)**

| Scenario FOCUS  | Period/ Waterbody | Max PEC <sub>sw</sub> (µg/L) | Dominant entry route | Max PEC <sub>sed</sub> (µg/kg) |
|-----------------|-------------------|------------------------------|----------------------|--------------------------------|
| Step 1          |                   |                              |                      |                                |
| -               | -                 | 125.789                      | -                    | 4710.000                       |
| Step 2          |                   |                              |                      |                                |
| Northern Europe | Mar-May           | 21.153                       | -                    | 882.486                        |

|                 |                       |        |          |          |
|-----------------|-----------------------|--------|----------|----------|
| Northern Europe | Jun-Sep               | 21.153 | -        | 882.486  |
| Northern Europe | Oct-Feb               | 48.975 | -        | 2090.000 |
| Southern Europe | Mar-May               | 39.701 | -        | 1690.000 |
| Southern Europe | Jun-Sep               | 30.427 | -        | 1280.000 |
| Southern Europe | Oct-Feb               | 39.701 | -        | 1690.000 |
| Step 3          |                       |        |          |          |
| D3              | Ditch                 | 3.251  | Drift    | 4.311    |
| D4              | Pond                  | 0.184  | Drainage | 5.913    |
| D4              | Stream                | 2.655  | Drift    | 0.826    |
| D6              | Ditch                 | 3.327  | Drift    | 20.760   |
| D6              | Ditch 2 <sup>nd</sup> | 3.301  | Drift    | 15.810   |
| R1              | Pond                  | 2.097  | Runoff   | 76.570   |
| R1              | Stream                | 4.082  | Runoff   | 488.300  |
| R2              | Stream                | 2.874  | Drift    | 1634.100 |
| R3              | Stream                | 3.023  | Drift    | 587.200  |
| R4              | Stream                | 4.846  | Runoff   | 459.900  |

**FOCUS Step 1, 2, and 3 PEC<sub>sw</sub> and PEC<sub>sed</sub> for glyphosate following application to vegetables, fruiting, early application (1 × 720 g a.s./ha)**

| Scenario FOCUS  | Period/ Waterbody | Max PEC <sub>sw</sub> (µg/L) | Dominant entry route | Max PEC <sub>sed</sub> (µg/kg) |
|-----------------|-------------------|------------------------------|----------------------|--------------------------------|
| Step 1          |                   |                              |                      |                                |
| -               | -                 | 41.930                       | -                    | 1570.000                       |
| Step 2          |                   |                              |                      |                                |
| Northern Europe | Mar-May           | 8.310                        | -                    | 341.678                        |
| Northern Europe | Jun-Sep           | 8.310                        | -                    | 341.678                        |
| Northern Europe | Oct-Feb           | 18.721                       | -                    | 792.933                        |
| Southern Europe | Mar-May           | 15.251                       | -                    | 642.035                        |
| Southern Europe | Jun-Sep           | 11.780                       | -                    | 491.846                        |
| Southern Europe | Oct-Feb           | 15.251                       | -                    | 642.035                        |
| Step 3          |                   |                              |                      |                                |
| D6              | Ditch             | 4.425                        | Drift                | 1.500                          |
| R2              | Stream            | 3.818                        | Drift                | 824.700                        |
| R3              | Stream            | 4.155                        | Drift                | 116.300                        |
| R4              | Stream            | 2.943                        | Drift                | 87.040                         |

**FOCUS Step 1, 2, and 3 PEC<sub>sw</sub> and PEC<sub>sed</sub> for glyphosate following application to vegetables, fruiting, early application (3 × 720 g a.s./ha, with application interval of 28 days)**

| Scenario FOCUS  | Period/ Waterbody | Max PEC <sub>sw</sub> (µg/L) | Dominant entry route | Max PEC <sub>sed</sub> (µg/kg) |
|-----------------|-------------------|------------------------------|----------------------|--------------------------------|
| Step 1          |                   |                              |                      |                                |
| -               | -                 | 125.789                      | -                    | 4710.000                       |
| Step 2          |                   |                              |                      |                                |
| Northern Europe | Mar-May           | 21.153                       | -                    | 882.486                        |
| Northern Europe | Jun-Sep           | 21.153                       | -                    | 882.486                        |
| Northern Europe | Oct-Feb           | 48.975                       | -                    | 2090.000                       |
| Southern Europe | Mar-May           | 39.701                       | -                    | 1690.000                       |
| Southern Europe | Jun-Sep           | 30.427                       | -                    | 1280.000                       |
| Southern Europe | Oct-Feb           | 39.701                       | -                    | 1690.000                       |
| Step 3          |                   |                              |                      |                                |
| D6              | Ditch             | 3.263                        | Drift                | 4.758                          |
| R2              | Stream            | 2.803                        | Drift                | 1889.000                       |
| R3              | Stream            | 3.159                        | Runoff               | 236.900                        |
| R4              | Stream            | 5.938                        | Runoff               | 559.600                        |

**FOCUS Step 1, 2, and 3 PEC<sub>sw</sub> and PEC<sub>sed</sub> for glyphosate following application to vegetables, fruiting, late application (1 × 720 g a.s./ha)**

| Scenario FOCUS  | Period/ Waterbody | Max PEC <sub>sw</sub> (µg/L) | Dominant entry route | Max PEC <sub>sed</sub> (µg/kg) |
|-----------------|-------------------|------------------------------|----------------------|--------------------------------|
| Step 1          |                   |                              |                      |                                |
| -               | -                 | 41.930                       | -                    | 1570.000                       |
| Step 2          |                   |                              |                      |                                |
| Northern Europe | Mar-May           | 8.310                        | -                    | 341.678                        |
| Northern Europe | Jun-Sep           | 8.310                        | -                    | 341.678                        |
| Northern Europe | Oct-Feb           | 18.721                       | -                    | 792.933                        |
| Southern Europe | Mar-May           | 15.251                       | -                    | 642.035                        |
| Southern Europe | Jun-Sep           | 11.780                       | -                    | 491.846                        |
| Southern Europe | Oct-Feb           | 15.251                       | -                    | 642.035                        |
| Step 3          |                   |                              |                      |                                |
| D6              | Ditch             | 4.509                        | Drift                | 12.030                         |
| R2              | Stream            | 3.969                        | Drift                | 922.200                        |
| R3              | Stream            | 4.175                        | Drift                | 366.100                        |
| R4              | Stream            | 2.955                        | Drift                | 224.000                        |

**FOCUS Step 1, 2, and 3 PEC<sub>sw</sub> and PEC<sub>sed</sub> for glyphosate following application to vegetables, fruiting, late application (3 × 720 g a.s./ha, with application interval of 28 days)**

| Scenario FOCUS  | Period/ Waterbody | Max PEC <sub>sw</sub> (µg/L) | Dominant entry route | Max PEC <sub>sed</sub> (µg/kg) |
|-----------------|-------------------|------------------------------|----------------------|--------------------------------|
| Step 1          |                   |                              |                      |                                |
| -               | -                 | 125.789                      | -                    | 4710.000                       |
| Step 2          |                   |                              |                      |                                |
| Northern Europe | Mar-May           | 21.153                       | -                    | 882.486                        |
| Northern Europe | Jun-Sep           | 21.153                       | -                    | 882.486                        |
| Northern Europe | Oct-Feb           | 48.975                       | -                    | 2090.000                       |
| Southern Europe | Mar-May           | 39.701                       | -                    | 1690.000                       |
| Southern Europe | Jun-Sep           | 30.427                       | -                    | 1280.000                       |
| Southern Europe | Oct-Feb           | 39.701                       | -                    | 1690.000                       |
| Step 3          |                   |                              |                      |                                |
| D6              | Ditch             | 3.328                        | Drift                | 20.900                         |
| R2              | Stream            | 2.873                        | Drift                | 2668.800                       |
| R3              | Stream            | 3.023                        | Drift                | 938.300                        |
| R4              | Stream            | 4.879                        | Runoff               | 616.500                        |

**FOCUS Step 1, 2, and 3 PEC<sub>sw</sub> and PEC<sub>sed</sub> for glyphosate following application to vegetables, leafy, early application (1 × 720 g a.s./ha)**

| Scenario FOCUS  | Period/ Waterbody     | Max PEC <sub>sw</sub> (µg/L) | Dominant entry route | Max PEC <sub>sed</sub> (µg/kg) |
|-----------------|-----------------------|------------------------------|----------------------|--------------------------------|
| Step 1          |                       |                              |                      |                                |
| -               | -                     | 41.930                       | -                    | 1570.000                       |
| Step 2          |                       |                              |                      |                                |
| Northern Europe | Mar-May               | 8.310                        | -                    | 341.678                        |
| Northern Europe | Jun-Sep               | 8.310                        | -                    | 341.678                        |
| Northern Europe | Oct-Feb               | 18.721                       | -                    | 792.933                        |
| Southern Europe | Mar-May               | 15.251                       | -                    | 642.035                        |
| Southern Europe | Jun-Sep               | 11.780                       | -                    | 491.846                        |
| Southern Europe | Oct-Feb               | 15.251                       | -                    | 642.035                        |
| Step 3          |                       |                              |                      |                                |
| D3              | Ditch                 | 4.470                        | Drift                | 2.893                          |
| D3              | Ditch 2 <sup>nd</sup> | 4.482                        | Drift                | 3.723                          |
| D4              | Pond                  | 0.149                        | Drift                | 2.362                          |
| D4              | Stream                | 3.412                        | Drift                | 0.124                          |
| D6              | Ditch                 | 4.518                        | Drift                | 16.040                         |
| R1              | Pond                  | 0.253                        | Runoff               | 19.090                         |

|    |                        |       |        |         |
|----|------------------------|-------|--------|---------|
| R1 | Pond 2 <sup>nd</sup>   | 0.582 | Runoff | 27.450  |
| R1 | Stream                 | 2.954 | Drift  | 221.000 |
| R1 | Stream 2 <sup>nd</sup> | 2.930 | Drift  | 434.800 |
| R2 | Stream                 | 3.867 | Drift  | 696.000 |
| R2 | Stream 2 <sup>nd</sup> | 3.969 | Drift  | 481.300 |
| R3 | Stream                 | 4.175 | Drift  | 267.900 |
| R3 | Stream 2 <sup>nd</sup> | 4.175 | Drift  | 132.700 |
| R4 | Stream                 | 2.918 | Drift  | 93.810  |
| R4 | Stream 2 <sup>nd</sup> | 2.902 | Drift  | 324.200 |

**FOCUS Step 1, 2, and 3 PEC<sub>sw</sub> and PEC<sub>sed</sub> for glyphosate following application to vegetables, leafy, early application (3 × 720 g a.s./ha, with application interval of 28 days)**

| Scenario FOCUS  | Period/ Waterbody      | Max PEC <sub>sw</sub> (µg/L) | Dominant entry route | Max PEC <sub>sed</sub> (µg/kg) |
|-----------------|------------------------|------------------------------|----------------------|--------------------------------|
| Step 1          |                        |                              |                      |                                |
| -               | -                      | 125.789                      | -                    | 4710.000                       |
| Step 2          |                        |                              |                      |                                |
| Northern Europe | Mar-May                | 21.153                       | -                    | 882.486                        |
| Northern Europe | Jun-Sep                | 21.153                       | -                    | 882.486                        |
| Northern Europe | Oct-Feb                | 48.975                       | -                    | 2090.000                       |
| Southern Europe | Mar-May                | 39.701                       | -                    | 1690.000                       |
| Southern Europe | Jun-Sep                | 30.427                       | -                    | 1280.000                       |
| Southern Europe | Oct-Feb                | 39.701                       | -                    | 1690.000                       |
| Step 3          |                        |                              |                      |                                |
| D3              | Ditch                  | 3.256                        | Drift                | 4.691                          |
| D3              | Ditch 2 <sup>nd</sup>  | 3.263                        | Drift                | 6.189                          |
| D4              | Pond                   | 0.141                        | Drift                | 4.752                          |
| D4              | Stream                 | 2.550                        | Drift                | 0.428                          |
| D6              | Ditch                  | 3.331                        | Drift                | 21.330                         |
| R1              | Pond                   | 1.102                        | Runoff               | 53.800                         |
| R1              | Pond 2 <sup>nd</sup>   | 1.385                        | Runoff               | 67.510                         |
| R1              | Stream                 | 4.056                        | Runoff               | 373.700                        |
| R1              | Stream 2 <sup>nd</sup> | 2.992                        | Runoff               | 848.000                        |
| R2              | Stream                 | 2.834                        | Drift                | 1958.400                       |
| R2              | Stream 2 <sup>nd</sup> | 2.882                        | Drift                | 955.600                        |
| R3              | Stream                 | 3.039                        | Runoff               | 641.100                        |
| R3              | Stream 2 <sup>nd</sup> | 3.040                        | Drift                | 456.900                        |
| R4              | Stream                 | 5.207                        | Runoff               | 180.600                        |
| R4              | Stream 2 <sup>nd</sup> | 5.286                        | Runoff               | 783.600                        |

**FOCUS Step 1, 2, and 3 PEC<sub>sw</sub> and PEC<sub>sed</sub> for glyphosate following application to vegetables, leafy, late application (1 × 720 g a.s./ha)**

| Scenario FOCUS  | Period/ Waterbody     | Max PEC <sub>sw</sub> (µg/L) | Dominant entry route | Max PEC <sub>sed</sub> (µg/kg) |
|-----------------|-----------------------|------------------------------|----------------------|--------------------------------|
| Step 1          |                       |                              |                      |                                |
| -               | -                     | 41.930                       | -                    | 1570.000                       |
| Step 2          |                       |                              |                      |                                |
| Northern Europe | Mar-May               | 8.310                        | -                    | 341.678                        |
| Northern Europe | Jun-Sep               | 8.310                        | -                    | 341.678                        |
| Northern Europe | Oct-Feb               | 18.721                       | -                    | 792.933                        |
| Southern Europe | Mar-May               | 15.251                       | -                    | 642.035                        |
| Southern Europe | Jun-Sep               | 11.780                       | -                    | 491.846                        |
| Southern Europe | Oct-Feb               | 15.251                       | -                    | 642.035                        |
| Step 3          |                       |                              |                      |                                |
| D3              | Ditch                 | 4.486                        | Drift                | 4.078                          |
| D3              | Ditch 2 <sup>nd</sup> | 4.447                        | Drift                | 1.914                          |
| D4              | Pond                  | 0.149                        | Drift                | 2.592                          |
| D4              | Stream                | 3.605                        | Drift                | 0.223                          |

|    |                        |       |        |         |
|----|------------------------|-------|--------|---------|
| D6 | Ditch                  | 4.518 | Drift  | 16.620  |
| R1 | Pond                   | 0.376 | Runoff | 22.340  |
| R1 | Pond 2 <sup>nd</sup>   | 0.503 | Runoff | 26.370  |
| R1 | Stream                 | 2.907 | Drift  | 189.400 |
| R1 | Stream 2 <sup>nd</sup> | 2.952 | Drift  | 266.700 |
| R2 | Stream                 | 3.969 | Drift  | 737.600 |
| R2 | Stream 2 <sup>nd</sup> | 3.908 | Drift  | 818.100 |
| R3 | Stream                 | 4.175 | Drift  | 534.200 |
| R3 | Stream 2 <sup>nd</sup> | 4.164 | Drift  | 366.000 |
| R4 | Stream                 | 2.955 | Drift  | 266.900 |
| R4 | Stream 2 <sup>nd</sup> | 2.955 | Drift  | 361.100 |

**FOCUS Step 1, 2, and 3 PEC<sub>sw</sub> and PEC<sub>sed</sub> for glyphosate following application to vegetables, leafy, late application (3 × 720 g a.s./ha, with application interval of 28 days)**

| Scenario FOCUS  | Period/ Waterbody      | Max PEC <sub>sw</sub> (µg/L) | Dominant entry route | Max PEC <sub>sed</sub> (µg/kg) |
|-----------------|------------------------|------------------------------|----------------------|--------------------------------|
| Step 1          |                        |                              |                      |                                |
| -               | -                      | 125.789                      | -                    | 4710.000                       |
| Step 2          |                        |                              |                      |                                |
| Northern Europe | Mar-May                | 21.153                       | -                    | 882.486                        |
| Northern Europe | Jun-Sep                | 21.153                       | -                    | 882.486                        |
| Northern Europe | Oct-Feb                | 48.975                       | -                    | 2090.000                       |
| Southern Europe | Mar-May                | 39.701                       | -                    | 1690.000                       |
| Southern Europe | Jun-Sep                | 30.427                       | -                    | 1280.000                       |
| Southern Europe | Oct-Feb                | 39.701                       | -                    | 1690.000                       |
| Step 3          |                        |                              |                      |                                |
| D3              | Ditch                  | 3.264                        | Drift                | 5.137                          |
| D3              | Ditch 2 <sup>nd</sup>  | 3.247                        | Drift                | 3.929                          |
| D4              | Pond                   | 0.197                        | Drainage             | 5.764                          |
| D4              | Stream                 | 2.679                        | Drift                | 0.881                          |
| D6              | Ditch                  | 3.288                        | Drift                | 12.190                         |
| R1              | Pond                   | 1.855                        | Runoff               | 77.990                         |
| R1              | Pond 2 <sup>nd</sup>   | 2.178                        | Runoff               | 83.780                         |
| R1              | Stream                 | 3.624                        | Runoff               | 478.400                        |
| R1              | Stream 2 <sup>nd</sup> | 3.986                        | Runoff               | 603.800                        |
| R2              | Stream                 | 2.873                        | Drift                | 2078.900                       |
| R2              | Stream 2 <sup>nd</sup> | 2.829                        | Drift                | 1896.500                       |
| R3              | Stream                 | 3.078                        | Drift                | 1425.200                       |
| R3              | Stream 2 <sup>nd</sup> | 3.015                        | Drift                | 938.200                        |
| R4              | Stream                 | 4.132                        | Runoff               | 724.500                        |
| R4              | Stream 2 <sup>nd</sup> | 5.612                        | Runoff               | 1048.500                       |

**FOCUS Step 1, 2, and 3 PEC<sub>sw</sub> and PEC<sub>sed</sub> for glyphosate following application to sugar beets, early application (1 × 720 g a.s./ha)**

| Scenario FOCUS  | Period/ Waterbody | Max PEC <sub>sw</sub> (µg/L) | Dominant entry route | Max PEC <sub>sed</sub> (µg/kg) |
|-----------------|-------------------|------------------------------|----------------------|--------------------------------|
| Step 1          |                   |                              |                      |                                |
| -               | -                 | 41.930                       | -                    | 1570.000                       |
| Step 2          |                   |                              |                      |                                |
| Northern Europe | Mar-May           | 8.310                        | -                    | 341.678                        |
| Northern Europe | Jun-Sep           | 8.310                        | -                    | 341.678                        |
| Northern Europe | Oct-Feb           | 18.721                       | -                    | 792.933                        |
| Southern Europe | Mar-May           | 15.251                       | -                    | 642.035                        |
| Southern Europe | Jun-Sep           | 11.780                       | -                    | 491.846                        |
| Southern Europe | Oct-Feb           | 15.251                       | -                    | 642.035                        |
| Step 3          |                   |                              |                      |                                |
| D3              | Ditch             | 3.696                        | Drift                | 2.539                          |
| D4              | Pond              | 0.144                        | Drift                | 2.286                          |

|    |        |       |       |        |
|----|--------|-------|-------|--------|
| D4 | Stream | 2.830 | Drift | 0.079  |
| R1 | Pond   | 0.232 | Drift | 10.630 |
| R1 | Stream | 2.481 | Drift | 59.660 |
| R3 | Stream | 3.619 | Drift | 80.850 |

**FOCUS Step 1, 2, and 3 PEC<sub>sw</sub> and PEC<sub>sed</sub> for glyphosate following application to sugar beets, early application (3 × 720 g a.s./ha, with application interval of 28 days)**

| Scenario FOCUS  | Period/ Waterbody | Max PEC <sub>sw</sub> (µg/L) | Dominant entry route | Max PEC <sub>sed</sub> (µg/kg) |
|-----------------|-------------------|------------------------------|----------------------|--------------------------------|
| Step 1          |                   |                              |                      |                                |
| -               | -                 | 125.789                      | -                    | 4710.000                       |
| Step 2          |                   |                              |                      |                                |
| Northern Europe | Mar-May           | 21.153                       | -                    | 882.486                        |
| Northern Europe | Jun-Sep           | 21.153                       | -                    | 882.486                        |
| Northern Europe | Oct-Feb           | 48.975                       | -                    | 2090.000                       |
| Southern Europe | Mar-May           | 39.701                       | -                    | 1690.000                       |
| Southern Europe | Jun-Sep           | 30.427                       | -                    | 1280.000                       |
| Southern Europe | Oct-Feb           | 39.701                       | -                    | 1690.000                       |
| Step 3          |                   |                              |                      |                                |
| D3              | Ditch             | 2.682                        | Drift                | 4.167                          |
| D4              | Pond              | 0.145                        | Drift                | 4.670                          |
| D4              | Stream            | 2.165                        | Drift                | 0.314                          |
| R1              | Pond              | 0.969                        | Runoff               | 39.310                         |
| R1              | Stream            | 4.083                        | Runoff               | 218.400                        |
| R3              | Stream            | 2.900                        | Runoff               | 187.600                        |

**FOCUS Step 1, 2, and 3 PEC<sub>sw</sub> and PEC<sub>sed</sub> for glyphosate following application to sugar beets, late application (1 × 720 g a.s./ha)**

| Scenario FOCUS  | Period/ Waterbody | Max PEC <sub>sw</sub> (µg/L) | Dominant entry route | Max PEC <sub>sed</sub> (µg/kg) |
|-----------------|-------------------|------------------------------|----------------------|--------------------------------|
| Step 1          |                   |                              |                      |                                |
| -               | -                 | 41.930                       | -                    | 1570.000                       |
| Step 2          |                   |                              |                      |                                |
| Northern Europe | Mar-May           | 8.310                        | -                    | 341.678                        |
| Northern Europe | Jun-Sep           | 8.310                        | -                    | 341.678                        |
| Northern Europe | Oct-Feb           | 18.721                       | -                    | 792.933                        |
| Southern Europe | Mar-May           | 15.251                       | -                    | 642.035                        |
| Southern Europe | Jun-Sep           | 11.780                       | -                    | 491.846                        |
| Southern Europe | Oct-Feb           | 15.251                       | -                    | 642.035                        |
| Step 3          |                   |                              |                      |                                |
| D3              | Ditch             | 3.694                        | Drift                | 2.415                          |
| D4              | Pond              | 0.144                        | Drift                | 2.467                          |
| D4              | Stream            | 3.239                        | Drift                | 0.314                          |
| R1              | Pond              | 0.482                        | Runoff               | 22.080                         |
| R1              | Stream            | 2.562                        | Drift                | 206.800                        |
| R3              | Stream            | 3.610                        | Drift                | 366.100                        |

**FOCUS Step 1, 2, and 3 PEC<sub>sw</sub> and PEC<sub>sed</sub> for glyphosate following application to sugar beets, late application (3 × 720 g a.s./ha, with application interval of 28 days)**

| Scenario FOCUS  | Period/ Waterbody | Max PEC <sub>sw</sub> (µg/L) | Dominant entry route | Max PEC <sub>sed</sub> (µg/kg) |
|-----------------|-------------------|------------------------------|----------------------|--------------------------------|
| Step 1          |                   |                              |                      |                                |
| -               | -                 | 125.789                      | -                    | 4710.000                       |
| Step 2          |                   |                              |                      |                                |
| Northern Europe | Mar-May           | 21.153                       | -                    | 882.486                        |
| Northern Europe | Jun-Sep           | 21.153                       | -                    | 882.486                        |
| Northern Europe | Oct-Feb           | 48.975                       | -                    | 2090.000                       |
| Southern Europe | Mar-May           | 39.701                       | -                    | 1690.000                       |



|                 |         |        |        |          |
|-----------------|---------|--------|--------|----------|
| Southern Europe | Jun-Sep | 30.427 | -      | 1280.000 |
| Southern Europe | Oct-Feb | 39.701 | -      | 1690.000 |
| Step 3          |         |        |        |          |
| D3              | Ditch   | 2.678  | Drift  | 4.166    |
| D4              | Pond    | 0.149  | Drift  | 4.818    |
| D4              | Stream  | 2.374  | Drift  | 0.635    |
| R1              | Pond    | 2.171  | Runoff | 72.980   |
| R1              | Stream  | 3.993  | Runoff | 546.800  |
| R3              | Stream  | 2.605  | Drift  | 938.400  |

**FOCUS Step 1, 2, and 3 PEC<sub>sw</sub> and PEC<sub>sed</sub> for glyphosate following application to pome / stone fruit, early, early application (1 × 720 g a.s./ha)**

| Scenario FOCUS  | Period/ Waterbody | Max PEC <sub>sw</sub> (µg/L) | Dominant entry route | Max PEC <sub>sed</sub> (µg/kg) |
|-----------------|-------------------|------------------------------|----------------------|--------------------------------|
| Step 1          |                   |                              |                      |                                |
| -               | -                 | 41.930                       | -                    | 1570.000                       |
| Step 2          |                   |                              |                      |                                |
| Northern Europe | Mar-May           | 8.310                        | -                    | 341.678                        |
| Northern Europe | Jun-Sep           | 8.310                        | -                    | 341.678                        |
| Northern Europe | Oct-Feb           | 18.721                       | -                    | 792.933                        |
| Southern Europe | Mar-May           | 15.251                       | -                    | 642.035                        |
| Southern Europe | Jun-Sep           | 11.780                       | -                    | 491.846                        |
| Southern Europe | Oct-Feb           | 15.251                       | -                    | 642.035                        |
| Step 3          |                   |                              |                      |                                |
| D3              | Ditch             | 1.884                        | Drift                | 1.383                          |
| D4              | Pond              | 0.119                        | Drift                | 1.900                          |
| D4              | Stream            | 1.445                        | Drift                | 0.040                          |
| D5              | Pond              | 0.119                        | Drift                | 1.971                          |
| D5              | Stream            | 1.594                        | Drift                | 0.050                          |
| R1              | Pond              | 0.119                        | Drift                | 1.954                          |
| R1              | Stream            | 1.306                        | Drift                | 1.358                          |
| R2              | Stream            | 1.722                        | Drift                | 8.698                          |
| R3              | Stream            | 1.832                        | Drift                | 2.492                          |
| R4              | Stream            | 1.297                        | Drift                | 8.887                          |

**FOCUS Step 1, 2, and 3 PEC<sub>sw</sub> and PEC<sub>sed</sub> for glyphosate following application to pome / stone fruit, early, early application (3 × 720 g a.s./ha, with application interval of 28 days)**

| Scenario FOCUS  | Period/ Waterbody | Max PEC <sub>sw</sub> (µg/L) | Dominant entry route | Max PEC <sub>sed</sub> (µg/kg) |
|-----------------|-------------------|------------------------------|----------------------|--------------------------------|
| Step 1          |                   |                              |                      |                                |
| -               | -                 | 125.789                      | -                    | 4710.000                       |
| Step 2          |                   |                              |                      |                                |
| Northern Europe | Mar-May           | 21.153                       | -                    | 882.486                        |
| Northern Europe | Jun-Sep           | 21.153                       | -                    | 882.486                        |
| Northern Europe | Oct-Feb           | 48.975                       | -                    | 2090.000                       |
| Southern Europe | Mar-May           | 39.701                       | -                    | 1690.000                       |
| Southern Europe | Jun-Sep           | 30.427                       | -                    | 1280.000                       |
| Southern Europe | Oct-Feb           | 39.701                       | -                    | 1690.000                       |
| Step 3          |                   |                              |                      |                                |
| D3              | Ditch             | 1.353                        | Drift                | 2.910                          |
| D4              | Pond              | 0.118                        | Drift                | 3.718                          |
| D4              | Stream            | 1.167                        | Drift                | 0.191                          |
| D5              | Pond              | 0.135                        | Drift                | 3.901                          |
| D5              | Stream            | 1.317                        | Drift                | 0.502                          |
| R1              | Pond              | 0.136                        | Drift                | 4.023                          |
| R1              | Stream            | 2.042                        | Runoff               | 4.028                          |
| R2              | Stream            | 1.249                        | Drift                | 21.500                         |
| R3              | Stream            | 1.317                        | Drift                | 6.488                          |

|    |        |       |        |        |
|----|--------|-------|--------|--------|
| R4 | Stream | 2.881 | Runoff | 20.760 |
|----|--------|-------|--------|--------|

**FOCUS Step 1, 2, and 3 PEC<sub>sw</sub> and PEC<sub>sed</sub> for glyphosate following application to pome / stone fruit, early, late application (1 × 720 g a.s./ha)**

| Scenario FOCUS  | Period/ Waterbody | Max PEC <sub>sw</sub> (µg/L) | Dominant entry route | Max PEC <sub>sed</sub> (µg/kg) |
|-----------------|-------------------|------------------------------|----------------------|--------------------------------|
| Step 1          |                   |                              |                      |                                |
| -               | -                 | 41.930                       | -                    | 1570.000                       |
| Step 2          |                   |                              |                      |                                |
| Northern Europe | Mar-May           | 8.310                        | -                    | 341.678                        |
| Northern Europe | Jun-Sep           | 8.310                        | -                    | 341.678                        |
| Northern Europe | Oct-Feb           | 18.721                       | -                    | 792.933                        |
| Southern Europe | Mar-May           | 15.251                       | -                    | 642.035                        |
| Southern Europe | Jun-Sep           | 11.780                       | -                    | 491.846                        |
| Southern Europe | Oct-Feb           | 15.251                       | -                    | 642.035                        |
| Step 3          |                   |                              |                      |                                |
| D3              | Ditch             | 1.894                        | Drift                | 2.541                          |
| D4              | Pond              | 0.119                        | Drift                | 2.129                          |
| D4              | Stream            | 1.674                        | Drift                | 0.203                          |
| D5              | Pond              | 0.119                        | Drift                | 2.134                          |
| D5              | Stream            | 1.849                        | Drift                | 0.540                          |
| R1              | Pond              | 0.123                        | Drift                | 2.811                          |
| R1              | Stream            | 1.307                        | Drift                | 3.388                          |
| R2              | Stream            | 1.757                        | Drift                | 31.900                         |
| R3              | Stream            | 1.848                        | Drift                | 34.250                         |
| R4              | Stream            | 1.307                        | Drift                | 16.080                         |

**FOCUS Step 1, 2, and 3 PEC<sub>sw</sub> and PEC<sub>sed</sub> for glyphosate following application to pome / stone fruit, early, late application (3 × 720 g a.s./ha, with application interval of 28 days)**

| Scenario FOCUS  | Period/ Waterbody | Max PEC <sub>sw</sub> (µg/L) | Dominant entry route | Max PEC <sub>sed</sub> (µg/kg) |
|-----------------|-------------------|------------------------------|----------------------|--------------------------------|
| Step 1          |                   |                              |                      |                                |
| -               | -                 | 125.789                      | -                    | 4710.000                       |
| Step 2          |                   |                              |                      |                                |
| Northern Europe | Mar-May           | 21.153                       | -                    | 882.486                        |
| Northern Europe | Jun-Sep           | 21.153                       | -                    | 882.486                        |
| Northern Europe | Oct-Feb           | 48.975                       | -                    | 2090.000                       |
| Southern Europe | Mar-May           | 39.701                       | -                    | 1690.000                       |
| Southern Europe | Jun-Sep           | 30.427                       | -                    | 1280.000                       |
| Southern Europe | Oct-Feb           | 39.701                       | -                    | 1690.000                       |
| Step 3          |                   |                              |                      |                                |
| D3              | Ditch             | 1.355                        | Drift                | 3.481                          |
| D4              | Pond              | 0.136                        | Drift                | 4.529                          |
| D4              | Stream            | 1.192                        | Drift                | 0.554                          |
| D5              | Pond              | 0.138                        | Drift                | 4.316                          |
| D5              | Stream            | 1.317                        | Drift                | 1.032                          |
| R1              | Pond              | 0.181                        | Runoff               | 7.712                          |
| R1              | Stream            | 3.103                        | Runoff               | 8.543                          |
| R2              | Stream            | 1.251                        | Drift                | 82.570                         |
| R3              | Stream            | 1.880                        | Runoff               | 42.090                         |
| R4              | Stream            | 4.414                        | Runoff               | 39.640                         |

**FOCUS Step 1, 2, and 3 PEC<sub>sw</sub> and PEC<sub>sed</sub> for glyphosate following application to olives, early application (1 × 720 g a.s./ha)**

| Scenario FOCUS | Period/ Waterbody | Max PEC <sub>sw</sub> (µg/L) | Dominant entry route | Max PEC <sub>sed</sub> (µg/kg) |
|----------------|-------------------|------------------------------|----------------------|--------------------------------|
| Step 1         |                   |                              |                      |                                |
| -              | -                 | 41.930                       | -                    | 1570.000                       |

| Step 2          |         |        |       |         |
|-----------------|---------|--------|-------|---------|
| Northern Europe | Mar-May | 8.310  | -     | 341.678 |
| Northern Europe | Jun-Sep | 8.310  | -     | 341.678 |
| Northern Europe | Oct-Feb | 18.721 | -     | 792.933 |
| Southern Europe | Mar-May | 15.251 | -     | 642.035 |
| Southern Europe | Jun-Sep | 11.780 | -     | 491.846 |
| Southern Europe | Oct-Feb | 15.251 | -     | 642.035 |
| Step 3          |         |        |       |         |
| D6              | Ditch   | 1.900  | Drift | 5.841   |
| R4              | Stream  | 1.299  | Drift | 16.410  |

**FOCUS Step 1, 2, and 3 PEC<sub>sw</sub> and PEC<sub>sed</sub> for glyphosate following application to olives, early application (3 × 720 g a.s./ha, with application interval of 28 days)**

| Scenario FOCUS  | Period/ Waterbody | Max PEC <sub>sw</sub> (µg/L) | Dominant entry route | Max PEC <sub>sed</sub> (µg/kg) |
|-----------------|-------------------|------------------------------|----------------------|--------------------------------|
| Step 1          |                   |                              |                      |                                |
| -               | -                 | 125.789                      | -                    | 4710.000                       |
| Step 2          |                   |                              |                      |                                |
| Northern Europe | Mar-May           | 21.153                       | -                    | 882.486                        |
| Northern Europe | Jun-Sep           | 21.153                       | -                    | 882.486                        |
| Northern Europe | Oct-Feb           | 48.975                       | -                    | 2090.000                       |
| Southern Europe | Mar-May           | 39.701                       | -                    | 1690.000                       |
| Southern Europe | Jun-Sep           | 30.427                       | -                    | 1280.000                       |
| Southern Europe | Oct-Feb           | 39.701                       | -                    | 1690.000                       |
| Step 3          |                   |                              |                      |                                |
| D6              | Ditch             | 1.384                        | Drift                | 11.430                         |
| R4              | Stream            | 3.993                        | Runoff               | 45.660                         |

**FOCUS Step 1, 2, and 3 PEC<sub>sw</sub> and PEC<sub>sed</sub> for glyphosate following application to olives, late application (1 × 720 g a.s./ha)**

| Scenario FOCUS  | Period/ Waterbody | Max PEC <sub>sw</sub> (µg/L) | Dominant entry route | Max PEC <sub>sed</sub> (µg/kg) |
|-----------------|-------------------|------------------------------|----------------------|--------------------------------|
| Step 1          |                   |                              |                      |                                |
| -               | -                 | 41.930                       | -                    | 1570.000                       |
| Step 2          |                   |                              |                      |                                |
| Northern Europe | Mar-May           | 8.310                        | -                    | 341.678                        |
| Northern Europe | Jun-Sep           | 8.310                        | -                    | 341.678                        |
| Northern Europe | Oct-Feb           | 18.721                       | -                    | 792.933                        |
| Southern Europe | Mar-May           | 15.251                       | -                    | 642.035                        |
| Southern Europe | Jun-Sep           | 11.780                       | -                    | 491.846                        |
| Southern Europe | Oct-Feb           | 15.251                       | -                    | 642.035                        |
| Step 3          |                   |                              |                      |                                |
| D6              | Ditch             | 1.902                        | Drift                | 7.036                          |
| R4              | Stream            | 1.459                        | Runoff               | 18.980                         |

**FOCUS Step 1, 2, and 3 PEC<sub>sw</sub> and PEC<sub>sed</sub> for glyphosate following application to olives, late application (3 × 720 g a.s./ha, with application interval of 28 days)**

| Scenario FOCUS  | Period/ Waterbody | Max PEC <sub>sw</sub> (µg/L) | Dominant entry route | Max PEC <sub>sed</sub> (µg/kg) |
|-----------------|-------------------|------------------------------|----------------------|--------------------------------|
| Step 1          |                   |                              |                      |                                |
| -               | -                 | 125.789                      | -                    | 4710.000                       |
| Step 2          |                   |                              |                      |                                |
| Northern Europe | Mar-May           | 21.153                       | -                    | 882.486                        |
| Northern Europe | Jun-Sep           | 21.153                       | -                    | 882.486                        |
| Northern Europe | Oct-Feb           | 48.975                       | -                    | 2090.000                       |
| Southern Europe | Mar-May           | 39.701                       | -                    | 1690.000                       |
| Southern Europe | Jun-Sep           | 30.427                       | -                    | 1280.000                       |
| Southern Europe | Oct-Feb           | 39.701                       | -                    | 1690.000                       |

| Step 3 |        |       |        |        |
|--------|--------|-------|--------|--------|
| D6     | Ditch  | 1.387 | Drift  | 12.460 |
| R4     | Stream | 5.228 | Runoff | 46.770 |

**FOCUS Step 1, 2, and 3 PEC<sub>sw</sub> and PEC<sub>sed</sub> for glyphosate following application to vines, early, early application (1 × 720 g a.s./ha)**

| Scenario FOCUS  | Period/ Waterbody | Max PEC <sub>sw</sub> (µg/L) | Dominant entry route | Max PEC <sub>sed</sub> (µg/kg) |
|-----------------|-------------------|------------------------------|----------------------|--------------------------------|
| Step 1          |                   |                              |                      |                                |
| -               | -                 | 41.930                       | -                    | 1570.000                       |
| Step 2          |                   |                              |                      |                                |
| Northern Europe | Mar-May           | 8.310                        | -                    | 341.678                        |
| Northern Europe | Jun-Sep           | 8.310                        | -                    | 341.678                        |
| Northern Europe | Oct-Feb           | 18.721                       | -                    | 792.933                        |
| Southern Europe | Mar-May           | 15.251                       | -                    | 642.035                        |
| Southern Europe | Jun-Sep           | 11.780                       | -                    | 491.846                        |
| Southern Europe | Oct-Feb           | 15.251                       | -                    | 642.035                        |
| Step 3          |                   |                              |                      |                                |
| D6              | Ditch             | 1.893                        | Drift                | 2.527                          |
| R1              | Pond              | 0.119                        | Drift                | 1.973                          |
| R1              | Stream            | 1.306                        | Drift                | 1.876                          |
| R2              | Stream            | 1.721                        | Drift                | 8.911                          |
| R3              | Stream            | 1.829                        | Drift                | 2.254                          |
| R4              | Stream            | 1.294                        | Drift                | 13.700                         |

**FOCUS Step 1, 2, and 3 PEC<sub>sw</sub> and PEC<sub>sed</sub> for glyphosate following application to vines, early, early application (3 × 720 g a.s./ha, with application interval of 28 days)**

| Scenario FOCUS  | Period/ Waterbody | Max PEC <sub>sw</sub> (µg/L) | Dominant entry route | Max PEC <sub>sed</sub> (µg/kg) |
|-----------------|-------------------|------------------------------|----------------------|--------------------------------|
| Step 1          |                   |                              |                      |                                |
| -               | -                 | 125.789                      | -                    | 4710.000                       |
| Step 2          |                   |                              |                      |                                |
| Northern Europe | Mar-May           | 21.153                       | -                    | 882.486                        |
| Northern Europe | Jun-Sep           | 21.153                       | -                    | 882.486                        |
| Northern Europe | Oct-Feb           | 48.975                       | -                    | 2090.000                       |
| Southern Europe | Mar-May           | 39.701                       | -                    | 1690.000                       |
| Southern Europe | Jun-Sep           | 30.427                       | -                    | 1280.000                       |
| Southern Europe | Oct-Feb           | 39.701                       | -                    | 1690.000                       |
| Step 3          |                   |                              |                      |                                |
| D6              | Ditch             | 1.378                        | Drift                | 10.060                         |
| R1              | Pond              | 0.139                        | Drift                | 4.314                          |
| R1              | Stream            | 2.519                        | Runoff               | 5.782                          |
| R2              | Stream            | 1.247                        | Drift                | 22.330                         |
| R3              | Stream            | 1.317                        | Drift                | 5.986                          |
| R4              | Stream            | 3.796                        | Runoff               | 38.840                         |

**FOCUS Step 1, 2, and 3 PEC<sub>sw</sub> and PEC<sub>sed</sub> for glyphosate following application to vines, early, late application (1 × 720 g a.s./ha)**

| Scenario FOCUS  | Period/ Waterbody | Max PEC <sub>sw</sub> (µg/L) | Dominant entry route | Max PEC <sub>sed</sub> (µg/kg) |
|-----------------|-------------------|------------------------------|----------------------|--------------------------------|
| Step 1          |                   |                              |                      |                                |
| -               | -                 | 41.930                       | -                    | 1570.000                       |
| Step 2          |                   |                              |                      |                                |
| Northern Europe | Mar-May           | 8.310                        | -                    | 341.678                        |
| Northern Europe | Jun-Sep           | 8.310                        | -                    | 341.678                        |
| Northern Europe | Oct-Feb           | 18.721                       | -                    | 792.933                        |
| Southern Europe | Mar-May           | 15.251                       | -                    | 642.035                        |
| Southern Europe | Jun-Sep           | 11.780                       | -                    | 491.846                        |

|                 |         |        |        |         |
|-----------------|---------|--------|--------|---------|
| Southern Europe | Oct-Feb | 15.251 | -      | 642.035 |
| Step 3          |         |        |        |         |
| D6              | Ditch   | 1.902  | Drift  | 7.036   |
| R1              | Pond    | 0.123  | Drift  | 2.806   |
| R1              | Stream  | 1.307  | Drift  | 3.413   |
| R2              | Stream  | 1.757  | Drift  | 31.850  |
| R3              | Stream  | 1.848  | Drift  | 34.270  |
| R4              | Stream  | 1.398  | Runoff | 16.920  |

**FOCUS Step 1, 2, and 3 PEC<sub>sw</sub> and PEC<sub>sed</sub> for glyphosate following application to vines, early, late application (3 × 720 g a.s./ha, with application interval of 28 days)**

| Scenario FOCUS  | Period/ Waterbody | Max PEC <sub>sw</sub> (µg/L) | Dominant entry route | Max PEC <sub>sed</sub> (µg/kg) |
|-----------------|-------------------|------------------------------|----------------------|--------------------------------|
| Step 1          |                   |                              |                      |                                |
| -               | -                 | 125.789                      | -                    | 4710.000                       |
| Step 2          |                   |                              |                      |                                |
| Northern Europe | Mar-May           | 21.153                       | -                    | 882.486                        |
| Northern Europe | Jun-Sep           | 21.153                       | -                    | 882.486                        |
| Northern Europe | Oct-Feb           | 48.975                       | -                    | 2090.000                       |
| Southern Europe | Mar-May           | 39.701                       | -                    | 1690.000                       |
| Southern Europe | Jun-Sep           | 30.427                       | -                    | 1280.000                       |
| Southern Europe | Oct-Feb           | 39.701                       | -                    | 1690.000                       |
| Step 3          |                   |                              |                      |                                |
| D6              | Ditch             | 1.684                        | Drainage             | 12.470                         |
| R1              | Pond              | 0.179                        | Runoff               | 7.700                          |
| R1              | Stream            | 2.997                        | Runoff               | 8.560                          |
| R2              | Stream            | 1.251                        | Drift                | 82.570                         |
| R3              | Stream            | 1.869                        | Runoff               | 42.070                         |
| R4              | Stream            | 5.009                        | Runoff               | 41.540                         |

***PEC calculations for 1 x 1440 g/ha and 2 x 1440 g/ha***

**FOCUS Step 1, 2, and 3 PEC<sub>sw</sub> and PEC<sub>sed</sub> for glyphosate following application to vegetables, root, early application (1 × 1440 g a.s./ha)**

| Scenario FOCUS  | Period/ Waterbody      | Max PEC <sub>sw</sub> (µg/L) | Dominant entry route | Max PEC <sub>sed</sub> (µg/kg) |
|-----------------|------------------------|------------------------------|----------------------|--------------------------------|
| Step 1          |                        |                              |                      |                                |
| -               | -                      | 83.859                       | -                    | 3140.000                       |
| Step 2          |                        |                              |                      |                                |
| Northern Europe | Mar-May                | 16.619                       | -                    | 683.356                        |
| Northern Europe | Jun-Sep                | 16.619                       | -                    | 683.356                        |
| Northern Europe | Oct-Feb                | 37.443                       | -                    | 1590.000                       |
| Southern Europe | Mar-May                | 30.501                       | -                    | 1280.000                       |
| Southern Europe | Jun-Sep                | 23.560                       | -                    | 983.693                        |
| Southern Europe | Oct-Feb                | 30.501                       | -                    | 1280.000                       |
| Step 3          |                        |                              |                      |                                |
| D3              | Ditch                  | 8.974                        | Drift                | 5.846                          |
| D6              | Ditch                  | 8.904                        | Drift                | 3.457                          |
| R1              | Pond                   | 0.372                        | Runoff               | 24.630                         |
| R1              | Stream                 | 5.932                        | Drift                | 124.200                        |
| R2              | Stream                 | 7.764                        | Drift                | 1301.300                       |
| R2              | Stream 2 <sup>nd</sup> | 7.968                        | Drift                | 1005.700                       |
| R3              | Stream                 | 8.381                        | Drift                | 189.900                        |
| R4              | Stream                 | 5.860                        | Drift                | 76.210                         |

**FOCUS Step 1, 2, and 3 PEC<sub>sw</sub> and PEC<sub>sed</sub> for glyphosate following application to vegetables, root, late application (1 × 1440 g a.s./ha)**

| Scenario FOCUS  | Period/ Waterbody      | Max PEC <sub>sw</sub> (µg/L) | Dominant entry route | Max PEC <sub>sed</sub> (µg/kg) |
|-----------------|------------------------|------------------------------|----------------------|--------------------------------|
| Step 1          |                        |                              |                      |                                |
| -               | -                      | 83.859                       | -                    | 3140.000                       |
| Step 2          |                        |                              |                      |                                |
| Northern Europe | Mar-May                | 16.619                       | -                    | 683.356                        |
| Northern Europe | Jun-Sep                | 16.619                       | -                    | 683.356                        |
| Northern Europe | Oct-Feb                | 37.443                       | -                    | 1590.000                       |
| Southern Europe | Mar-May                | 30.501                       | -                    | 1280.000                       |
| Southern Europe | Jun-Sep                | 23.560                       | -                    | 983.693                        |
| Southern Europe | Oct-Feb                | 30.501                       | -                    | 1280.000                       |
| Step 3          |                        |                              |                      |                                |
| D3              | Ditch                  | 9.007                        | Drift                | 8.308                          |
| D6              | Ditch                  | 9.030                        | Drift                | 13.950                         |
| R1              | Pond                   | 1.004                        | Runoff               | 40.990                         |
| R1              | Stream                 | 5.936                        | Drift                | 250.900                        |
| R2              | Stream                 | 7.968                        | Drift                | 1013.000                       |
| R2              | Stream 2 <sup>nd</sup> | 7.877                        | Drift                | 1388.900                       |
| R3              | Stream                 | 8.381                        | Drift                | 143.100                        |
| R4              | Stream                 | 5.833                        | Drift                | 372.700                        |

**FOCUS Step 1, 2, and 3 PEC<sub>sw</sub> and PEC<sub>sed</sub> for glyphosate following application to potatoes, early application (1 × 1440 g a.s./ha)**

| Scenario FOCUS  | Period/ Waterbody     | Max PEC <sub>sw</sub> (µg/L) | Dominant entry route | Max PEC <sub>sed</sub> (µg/kg) |
|-----------------|-----------------------|------------------------------|----------------------|--------------------------------|
| Step 1          |                       |                              |                      |                                |
| -               | -                     | 83.859                       | -                    | 3140.000                       |
| Step 2          |                       |                              |                      |                                |
| Northern Europe | Mar-May               | 16.619                       | -                    | 683.356                        |
| Northern Europe | Jun-Sep               | 16.619                       | -                    | 683.356                        |
| Northern Europe | Oct-Feb               | 37.443                       | -                    | 1590.000                       |
| Southern Europe | Mar-May               | 30.501                       | -                    | 1280.000                       |
| Southern Europe | Jun-Sep               | 23.560                       | -                    | 983.693                        |
| Southern Europe | Oct-Feb               | 30.501                       | -                    | 1280.000                       |
| Step 3          |                       |                              |                      |                                |
| D3              | Ditch                 | 7.422                        | Drift                | 5.125                          |
| D4              | Pond                  | 0.292                        | Drift                | 4.462                          |
| D4              | Stream                | 5.941                        | Drift                | 0.229                          |
| D6              | Ditch                 | 7.342                        | Drift                | 2.511                          |
| D6              | Ditch 2 <sup>nd</sup> | 7.385                        | Drift                | 3.416                          |
| R1              | Pond                  | 0.375                        | Runoff               | 23.780                         |
| R1              | Stream                | 5.143                        | Drift                | 120.500                        |
| R2              | Stream                | 6.646                        | Drift                | 1547.900                       |
| R3              | Stream                | 7.267                        | Drift                | 134.400                        |

**FOCUS Step 1, 2, and 3 PEC<sub>sw</sub> and PEC<sub>sed</sub> for glyphosate following application to potatoes, late application (1 × 1440 g a.s./ha)**

| Scenario FOCUS  | Period/ Waterbody | Max PEC <sub>sw</sub> (µg/L) | Dominant entry route | Max PEC <sub>sed</sub> (µg/kg) |
|-----------------|-------------------|------------------------------|----------------------|--------------------------------|
| Step 1          |                   |                              |                      |                                |
| -               | -                 | 83.859                       | -                    | 3140.000                       |
| Step 2          |                   |                              |                      |                                |
| Northern Europe | Mar-May           | 16.619                       | -                    | 683.356                        |
| Northern Europe | Jun-Sep           | 16.619                       | -                    | 683.356                        |
| Northern Europe | Oct-Feb           | 37.443                       | -                    | 1590.000                       |
| Southern Europe | Mar-May           | 30.501                       | -                    | 1280.000                       |

|                 |                       |        |        |          |
|-----------------|-----------------------|--------|--------|----------|
| Southern Europe | Jun-Sep               | 23.560 | -      | 983.693  |
| Southern Europe | Oct-Feb               | 30.501 | -      | 1280.000 |
| Step 3          |                       |        |        |          |
| D3              | Ditch                 | 7.417  | Drift  | 4.846    |
| D4              | Pond                  | 0.292  | Drift  | 5.082    |
| D4              | Stream                | 6.314  | Drift  | 0.502    |
| D6              | Ditch                 | 7.473  | Drift  | 15.430   |
| D6              | Ditch 2 <sup>nd</sup> | 7.496  | Drift  | 27.250   |
| R1              | Pond                  | 1.179  | Runoff | 48.470   |
| R1              | Stream                | 5.147  | Drift  | 294.400  |
| R2              | Stream                | 6.909  | Drift  | 1178.700 |
| R3              | Stream                | 7.255  | Drift  | 614.100  |

**FOCUS Step 1, 2, and 3 PEC<sub>sw</sub> and PEC<sub>sed</sub> for glyphosate following application to vegetables, bulb, early application (1 × 1440 g a.s./ha)**

| Scenario FOCUS  | Period/ Waterbody     | Max PEC <sub>sw</sub> (µg/L) | Dominant entry route | Max PEC <sub>sed</sub> (µg/kg) |
|-----------------|-----------------------|------------------------------|----------------------|--------------------------------|
| Step 1          |                       |                              |                      |                                |
| -               | -                     | 83.859                       | -                    | 3140.000                       |
| Step 2          |                       |                              |                      |                                |
| Northern Europe | Mar-May               | 16.619                       | -                    | 683.356                        |
| Northern Europe | Jun-Sep               | 16.619                       | -                    | 683.356                        |
| Northern Europe | Oct-Feb               | 37.443                       | -                    | 1590.000                       |
| Southern Europe | Mar-May               | 30.501                       | -                    | 1280.000                       |
| Southern Europe | Jun-Sep               | 23.560                       | -                    | 983.693                        |
| Southern Europe | Oct-Feb               | 30.501                       | -                    | 1280.000                       |
| Step 3          |                       |                              |                      |                                |
| D3              | Ditch                 | 8.974                        | Drift                | 5.849                          |
| D4              | Pond                  | 0.301                        | Drift                | 4.582                          |
| D4              | Stream                | 6.557                        | Drift                | 0.215                          |
| D6              | Ditch                 | 8.963                        | Drift                | 5.196                          |
| D6              | Ditch 2 <sup>nd</sup> | 9.070                        | Drift                | 31.720                         |
| R1              | Pond                  | 0.377                        | Runoff               | 24.820                         |
| R1              | Stream                | 5.932                        | Drift                | 127.400                        |
| R2              | Stream                | 7.764                        | Drift                | 1305.000                       |
| R3              | Stream                | 8.380                        | Drift                | 173.500                        |
| R4              | Stream                | 5.858                        | Drift                | 75.810                         |

**FOCUS Step 1, 2, and 3 PEC<sub>sw</sub> and PEC<sub>sed</sub> for glyphosate following application to vegetables, bulb, late application (1 × 1440 g a.s./ha)**

| Scenario FOCUS  | Period/ Waterbody     | Max PEC <sub>sw</sub> (µg/L) | Dominant entry route | Max PEC <sub>sed</sub> (µg/kg) |
|-----------------|-----------------------|------------------------------|----------------------|--------------------------------|
| Step 1          |                       |                              |                      |                                |
| -               | -                     | 83.859                       | -                    | 3140.000                       |
| Step 2          |                       |                              |                      |                                |
| Northern Europe | Mar-May               | 16.619                       | -                    | 683.356                        |
| Northern Europe | Jun-Sep               | 16.619                       | -                    | 683.356                        |
| Northern Europe | Oct-Feb               | 37.443                       | -                    | 1590.000                       |
| Southern Europe | Mar-May               | 30.501                       | -                    | 1280.000                       |
| Southern Europe | Jun-Sep               | 23.560                       | -                    | 983.693                        |
| Southern Europe | Oct-Feb               | 30.501                       | -                    | 1280.000                       |
| Step 3          |                       |                              |                      |                                |
| D3              | Ditch                 | 8.970                        | Drift                | 5.541                          |
| D4              | Pond                  | 0.301                        | Drift                | 5.238                          |
| D4              | Stream                | 7.096                        | Drift                | 0.483                          |
| D6              | Ditch                 | 9.070                        | Drift                | 31.350                         |
| D6              | Ditch 2 <sup>nd</sup> | 8.797                        | Drift                | 1.912                          |
| R1              | Pond                  | 1.130                        | Runoff               | 45.900                         |

|    |        |       |       |         |
|----|--------|-------|-------|---------|
| R1 | Stream | 5.936 | Drift | 296.000 |
| R2 | Stream | 7.968 | Drift | 962.800 |
| R3 | Stream | 8.367 | Drift | 265.900 |
| R4 | Stream | 5.934 | Drift | 247.200 |

**FOCUS Step 1, 2, and 3 PEC<sub>sw</sub> and PEC<sub>sed</sub> for glyphosate following application to vegetables, fruiting, early application (1 × 1440 g a.s./ha)**

| Scenario FOCUS  | Period/ Waterbody | Max PEC <sub>sw</sub> (µg/L) | Dominant entry route | Max PEC <sub>sed</sub> (µg/kg) |
|-----------------|-------------------|------------------------------|----------------------|--------------------------------|
| Step 1          |                   |                              |                      |                                |
| -               | -                 | 83.859                       | -                    | 3140.000                       |
| Step 2          |                   |                              |                      |                                |
| Northern Europe | Mar-May           | 16.619                       | -                    | 683.356                        |
| Northern Europe | Jun-Sep           | 16.619                       | -                    | 683.356                        |
| Northern Europe | Oct-Feb           | 37.443                       | -                    | 1590.000                       |
| Southern Europe | Mar-May           | 30.501                       | -                    | 1280.000                       |
| Southern Europe | Jun-Sep           | 23.560                       | -                    | 983.693                        |
| Southern Europe | Oct-Feb           | 30.501                       | -                    | 1280.000                       |
| Step 3          |                   |                              |                      |                                |
| D6              | Ditch             | 8.884                        | Drift                | 3.024                          |
| R2              | Stream            | 7.665                        | Drift                | 1568.500                       |
| R3              | Stream            | 8.342                        | Drift                | 217.700                        |
| R4              | Stream            | 5.911                        | Drift                | 129.300                        |

**FOCUS Step 1, 2, and 3 PEC<sub>sw</sub> and PEC<sub>sed</sub> for glyphosate following application to vegetables, fruiting, late application (1 × 1440 g a.s./ha)**

| Scenario FOCUS  | Period/ Waterbody | Max PEC <sub>sw</sub> (µg/L) | Dominant entry route | Max PEC <sub>sed</sub> (µg/kg) |
|-----------------|-------------------|------------------------------|----------------------|--------------------------------|
| Step 1          |                   |                              |                      |                                |
| -               | -                 | 83.859                       | -                    | 3140.000                       |
| Step 2          |                   |                              |                      |                                |
| Northern Europe | Mar-May           | 16.619                       | -                    | 683.356                        |
| Northern Europe | Jun-Sep           | 16.619                       | -                    | 683.356                        |
| Northern Europe | Oct-Feb           | 37.443                       | -                    | 1590.000                       |
| Southern Europe | Mar-May           | 30.501                       | -                    | 1280.000                       |
| Southern Europe | Jun-Sep           | 23.560                       | -                    | 983.693                        |
| Southern Europe | Oct-Feb           | 30.501                       | -                    | 1280.000                       |
| Step 3          |                   |                              |                      |                                |
| D6              | Ditch             | 9.051                        | Drift                | 23.730                         |
| R2              | Stream            | 7.968                        | Drift                | 1675.900                       |
| R3              | Stream            | 8.381                        | Drift                | 614.100                        |
| R4              | Stream            | 5.935                        | Drift                | 344.000                        |

**FOCUS Step 1, 2, and 3 PEC<sub>sw</sub> and PEC<sub>sed</sub> for glyphosate following application to vegetables, leafy, early application (1 × 1440 g a.s./ha)**

| Scenario FOCUS  | Period/ Waterbody | Max PEC <sub>sw</sub> (µg/L) | Dominant entry route | Max PEC <sub>sed</sub> (µg/kg) |
|-----------------|-------------------|------------------------------|----------------------|--------------------------------|
| Step 1          |                   |                              |                      |                                |
| -               | -                 | 83.859                       | -                    | 3140.000                       |
| Step 2          |                   |                              |                      |                                |
| Northern Europe | Mar-May           | 16.619                       | -                    | 683.356                        |
| Northern Europe | Jun-Sep           | 16.619                       | -                    | 683.356                        |
| Northern Europe | Oct-Feb           | 37.443                       | -                    | 1590.000                       |
| Southern Europe | Mar-May           | 30.501                       | -                    | 1280.000                       |
| Southern Europe | Jun-Sep           | 23.560                       | -                    | 983.693                        |
| Southern Europe | Oct-Feb           | 30.501                       | -                    | 1280.000                       |
| Step 3          |                   |                              |                      |                                |
| D3              | Ditch             | 8.974                        | Drift                | 5.790                          |



|    |                        |       |        |          |
|----|------------------------|-------|--------|----------|
| D3 | Ditch 2 <sup>nd</sup>  | 8.998 | Drift  | 7.445    |
| D4 | Pond                   | 0.301 | Drift  | 4.601    |
| D4 | Stream                 | 6.852 | Drift  | 0.249    |
| D6 | Ditch                  | 9.070 | Drift  | 31.550   |
| R1 | Pond                   | 0.638 | Runoff | 38.320   |
| R1 | Pond 2 <sup>nd</sup>   | 1.448 | Runoff | 57.330   |
| R1 | Stream                 | 5.933 | Drift  | 348.600  |
| R1 | Stream 2 <sup>nd</sup> | 5.885 | Drift  | 809.100  |
| R2 | Stream                 | 7.765 | Drift  | 1307.300 |
| R2 | Stream 2 <sup>nd</sup> | 7.968 | Drift  | 863.100  |
| R3 | Stream                 | 8.381 | Drift  | 430.300  |
| R3 | Stream 2 <sup>nd</sup> | 8.381 | Drift  | 240.400  |
| R4 | Stream                 | 5.861 | Drift  | 128.200  |
| R4 | Stream 2 <sup>nd</sup> | 5.828 | Drift  | 572.400  |

**FOCUS Step 1, 2, and 3 PEC<sub>sw</sub> and PEC<sub>sed</sub> for glyphosate following application to vegetables, leafy, late application (1 × 1440 g a.s./ha)**

| Scenario FOCUS  | Period/ Waterbody      | Max PEC <sub>sw</sub> (µg/L) | Dominant entry route | Max PEC <sub>sed</sub> (µg/kg) |
|-----------------|------------------------|------------------------------|----------------------|--------------------------------|
| Step 1          |                        |                              |                      |                                |
| -               | -                      | 83.859                       | -                    | 3140.000                       |
| Step 2          |                        |                              |                      |                                |
| Northern Europe | Mar-May                | 16.619                       | -                    | 683.356                        |
| Northern Europe | Jun-Sep                | 16.619                       | -                    | 683.356                        |
| Northern Europe | Oct-Feb                | 37.443                       | -                    | 1590.000                       |
| Southern Europe | Mar-May                | 30.501                       | -                    | 1280.000                       |
| Southern Europe | Jun-Sep                | 23.560                       | -                    | 983.693                        |
| Southern Europe | Oct-Feb                | 30.501                       | -                    | 1280.000                       |
| Step 3          |                        |                              |                      |                                |
| D3              | Ditch                  | 9.005                        | Drift                | 8.150                          |
| D3              | Ditch 2 <sup>nd</sup>  | 8.928                        | Drift                | 3.836                          |
| D4              | Pond                   | 0.302                        | Drift                | 5.248                          |
| D4              | Stream                 | 7.238                        | Drift                | 0.538                          |
| D6              | Ditch                  | 9.070                        | Drift                | 32.690                         |
| R1              | Pond                   | 0.951                        | Runoff               | 46.630                         |
| R1              | Pond 2 <sup>nd</sup>   | 1.272                        | Runoff               | 54.230                         |
| R1              | Stream                 | 5.840                        | Drift                | 310.700                        |
| R1              | Stream 2 <sup>nd</sup> | 5.930                        | Drift                | 431.400                        |
| R2              | Stream                 | 7.968                        | Drift                | 1367.800                       |
| R2              | Stream 2 <sup>nd</sup> | 7.846                        | Drift                | 1515.200                       |
| R3              | Stream                 | 8.381                        | Drift                | 988.600                        |
| R3              | Stream 2 <sup>nd</sup> | 8.360                        | Drift                | 613.900                        |
| R4              | Stream                 | 5.934                        | Drift                | 444.000                        |
| R4              | Stream 2 <sup>nd</sup> | 5.935                        | Drift                | 574.900                        |

**FOCUS Step 1, 2, and 3 PEC<sub>sw</sub> and PEC<sub>sed</sub> for glyphosate following application to sugar beets, early application (1 × 1440 g a.s./ha)**

| Scenario FOCUS  | Period/ Waterbody | Max PEC <sub>sw</sub> (µg/L) | Dominant entry route | Max PEC <sub>sed</sub> (µg/kg) |
|-----------------|-------------------|------------------------------|----------------------|--------------------------------|
| Step 1          |                   |                              |                      |                                |
| -               | -                 | 83.859                       | -                    | 3140.000                       |
| Step 2          |                   |                              |                      |                                |
| Northern Europe | Mar-May           | 16.619                       | -                    | 683.356                        |
| Northern Europe | Jun-Sep           | 16.619                       | -                    | 683.356                        |
| Northern Europe | Oct-Feb           | 37.443                       | -                    | 1590.000                       |
| Southern Europe | Mar-May           | 30.501                       | -                    | 1280.000                       |
| Southern Europe | Jun-Sep           | 23.560                       | -                    | 983.693                        |
| Southern Europe | Oct-Feb           | 30.501                       | -                    | 1280.000                       |

| Step 3 |        |       |        |         |
|--------|--------|-------|--------|---------|
| D3     | Ditch  | 7.421 | Drift  | 5.083   |
| D4     | Pond   | 0.292 | Drift  | 4.448   |
| D4     | Stream | 5.685 | Drift  | 0.160   |
| R1     | Pond   | 0.518 | Runoff | 22.190  |
| R1     | Stream | 4.984 | Drift  | 97.000  |
| R3     | Stream | 7.267 | Drift  | 130.300 |

**FOCUS Step 1, 2, and 3 PEC<sub>sw</sub> and PEC<sub>sed</sub> for glyphosate following application to sugar beets, late application (1 × 1440 g a.s./ha)**

| Scenario FOCUS  | Period/ Waterbody | Max PEC <sub>sw</sub> (µg/L) | Dominant entry route | Max PEC <sub>sed</sub> (µg/kg) |
|-----------------|-------------------|------------------------------|----------------------|--------------------------------|
| Step 1          |                   |                              |                      |                                |
| -               | -                 | 83.859                       | -                    | 3140.000                       |
| Step 2          |                   |                              |                      |                                |
| Northern Europe | Mar-May           | 16.619                       | -                    | 683.356                        |
| Northern Europe | Jun-Sep           | 16.619                       | -                    | 683.356                        |
| Northern Europe | Oct-Feb           | 37.443                       | -                    | 1590.000                       |
| Southern Europe | Mar-May           | 30.501                       | -                    | 1280.000                       |
| Southern Europe | Jun-Sep           | 23.560                       | -                    | 983.693                        |
| Southern Europe | Oct-Feb           | 30.501                       | -                    | 1280.000                       |
| Step 3          |                   |                              |                      |                                |
| D3              | Ditch             | 7.418                        | Drift                | 4.837                          |
| D4              | Pond              | 0.292                        | Drift                | 4.962                          |
| D4              | Stream            | 6.505                        | Drift                | 0.685                          |
| R1              | Pond              | 1.219                        | Runoff               | 46.420                         |
| R1              | Stream            | 5.146                        | Drift                | 354.500                        |
| R3              | Stream            | 7.248                        | Drift                | 614.200                        |

**FOCUS Step 1, 2, and 3 PEC<sub>sw</sub> and PEC<sub>sed</sub> for glyphosate following application to pome / stone fruit, early, early application (1 × 1440 g a.s./ha)**

| Scenario FOCUS  | Period/ Waterbody | Max PEC <sub>sw</sub> (µg/L) | Dominant entry route | Max PEC <sub>sed</sub> (µg/kg) |
|-----------------|-------------------|------------------------------|----------------------|--------------------------------|
| Step 1          |                   |                              |                      |                                |
| -               | -                 | 83.859                       | -                    | 3140.000                       |
| Step 2          |                   |                              |                      |                                |
| Northern Europe | Mar-May           | 16.619                       | -                    | 683.356                        |
| Northern Europe | Jun-Sep           | 16.619                       | -                    | 683.356                        |
| Northern Europe | Oct-Feb           | 37.443                       | -                    | 1590.000                       |
| Southern Europe | Mar-May           | 30.501                       | -                    | 1280.000                       |
| Southern Europe | Jun-Sep           | 23.560                       | -                    | 983.693                        |
| Southern Europe | Oct-Feb           | 30.501                       | -                    | 1280.000                       |
| Step 3          |                   |                              |                      |                                |
| D3              | Ditch             | 3.787                        | Drift                | 2.773                          |
| D4              | Pond              | 0.240                        | Drift                | 3.704                          |
| D4              | Stream            | 2.904                        | Drift                | 0.082                          |
| D5              | Pond              | 0.240                        | Drift                | 3.854                          |
| D5              | Stream            | 3.204                        | Drift                | 0.101                          |
| R1              | Pond              | 0.240                        | Drift                | 3.813                          |
| R1              | Stream            | 2.627                        | Drift                | 2.550                          |
| R2              | Stream            | 3.462                        | Drift                | 14.680                         |
| R3              | Stream            | 3.681                        | Drift                | 4.213                          |
| R4              | Stream            | 2.609                        | Drift                | 13.100                         |

**FOCUS Step 1, 2, and 3 PEC<sub>sw</sub> and PEC<sub>sed</sub> for glyphosate following application to pome / stone fruit, early, early application (2 × 1440 g a.s./ha, with application interval of 28 days)**

| Scenario FOCUS  | Period/ Waterbody | Max PEC <sub>sw</sub> (µg/L) | Dominant entry route | Max PEC <sub>sed</sub> (µg/kg) |
|-----------------|-------------------|------------------------------|----------------------|--------------------------------|
| Step 1          |                   |                              |                      |                                |
| -               | -                 | 167.718                      | -                    | 6280.000                       |
| Step 2          |                   |                              |                      |                                |
| Northern Europe | Mar-May           | 30.666                       | -                    | 1270.000                       |
| Northern Europe | Jun-Sep           | 30.666                       | -                    | 1270.000                       |
| Northern Europe | Oct-Feb           | 69.948                       | -                    | 2970.000                       |
| Southern Europe | Mar-May           | 56.854                       | -                    | 2400.000                       |
| Southern Europe | Jun-Sep           | 43.760                       | -                    | 1840.000                       |
| Southern Europe | Oct-Feb           | 56.854                       | -                    | 2400.000                       |
| Step 3          |                   |                              |                      |                                |
| D3              | Ditch             | 3.215                        | Drift                | 4.533                          |
| D4              | Pond              | 0.263                        | Drift                | 5.839                          |
| D4              | Stream            | 2.551                        | Drift                | 0.258                          |
| D5              | Pond              | 0.266                        | Drift                | 6.065                          |
| D5              | Stream            | 2.954                        | Drift                | 0.308                          |
| R1              | Pond              | 0.249                        | Drift                | 6.226                          |
| R1              | Stream            | 3.130                        | Runoff               | 5.558                          |
| R2              | Stream            | 2.915                        | Drift                | 25.110                         |
| R3              | Stream            | 3.111                        | Drift                | 6.997                          |
| R4              | Stream            | 6.376                        | Runoff               | 21.990                         |

**FOCUS Step 1, 2, and 3 PEC<sub>sw</sub> and PEC<sub>sed</sub> for glyphosate following application to pome / stone fruit, early, late application (1 × 1440 g a.s./ha)**

| Scenario FOCUS  | Period/ Waterbody | Max PEC <sub>sw</sub> (µg/L) | Dominant entry route | Max PEC <sub>sed</sub> (µg/kg) |
|-----------------|-------------------|------------------------------|----------------------|--------------------------------|
| Step 1          |                   |                              |                      |                                |
| -               | -                 | 83.859                       | -                    | 3140.000                       |
| Step 2          |                   |                              |                      |                                |
| Northern Europe | Mar-May           | 16.619                       | -                    | 683.356                        |
| Northern Europe | Jun-Sep           | 16.619                       | -                    | 683.356                        |
| Northern Europe | Oct-Feb           | 37.443                       | -                    | 1590.000                       |
| Southern Europe | Mar-May           | 30.501                       | -                    | 1280.000                       |
| Southern Europe | Jun-Sep           | 23.560                       | -                    | 983.693                        |
| Southern Europe | Oct-Feb           | 30.501                       | -                    | 1280.000                       |
| Step 3          |                   |                              |                      |                                |
| D3              | Ditch             | 3.806                        | Drift                | 5.080                          |
| D4              | Pond              | 0.240                        | Drift                | 4.241                          |
| D4              | Stream            | 3.364                        | Drift                | 0.425                          |
| D5              | Pond              | 0.240                        | Drift                | 4.162                          |
| D5              | Stream            | 3.716                        | Drift                | 1.087                          |
| R1              | Pond              | 0.250                        | Drift                | 5.742                          |
| R1              | Stream            | 2.629                        | Drift                | 5.566                          |
| R2              | Stream            | 3.530                        | Drift                | 54.590                         |
| R3              | Stream            | 3.714                        | Drift                | 61.020                         |
| R4              | Stream            | 2.981                        | Runoff               | 26.700                         |

**FOCUS Step 1, 2, and 3 PEC<sub>sw</sub> and PEC<sub>sed</sub> for glyphosate following application to pome / stone fruit, early, late application (2 × 1440 g a.s./ha, with application interval of 28 days)**

| Scenario FOCUS  | Period/ Waterbody | Max PEC <sub>sw</sub> (µg/L) | Dominant entry route | Max PEC <sub>sed</sub> (µg/kg) |
|-----------------|-------------------|------------------------------|----------------------|--------------------------------|
| Step 1          |                   |                              |                      |                                |
| -               | -                 | 167.718                      | -                    | 6280.000                       |
| Step 2          |                   |                              |                      |                                |
| Northern Europe | Mar-May           | 30.666                       | -                    | 1270.000                       |

|                 |         |        |        |          |
|-----------------|---------|--------|--------|----------|
| Northern Europe | Jun-Sep | 30.666 | -      | 1270.000 |
| Northern Europe | Oct-Feb | 69.948 | -      | 2970.000 |
| Southern Europe | Mar-May | 56.854 | -      | 2400.000 |
| Southern Europe | Jun-Sep | 43.760 | -      | 1840.000 |
| Southern Europe | Oct-Feb | 56.854 | -      | 2400.000 |
| Step 3          |         |        |        |          |
| D3              | Ditch   | 3.227  | Drift  | 6.678    |
| D4              | Pond    | 0.276  | Drift  | 7.236    |
| D4              | Stream  | 2.829  | Drift  | 0.870    |
| D5              | Pond    | 0.280  | Drift  | 6.719    |
| D5              | Stream  | 3.125  | Drift  | 1.711    |
| R1              | Pond    | 0.283  | Drift  | 10.790   |
| R1              | Stream  | 4.266  | Runoff | 9.910    |
| R2              | Stream  | 2.969  | Drift  | 101.400  |
| R3              | Stream  | 3.123  | Drift  | 61.630   |
| R4              | Stream  | 5.590  | Runoff | 45.430   |

**FOCUS Step 1, 2, and 3 PEC<sub>sw</sub> and PEC<sub>sed</sub> for glyphosate following application to olives, early application (1 × 1440 g a.s./ha)**

| Scenario FOCUS  | Period/ Waterbody | Max PEC <sub>sw</sub> (µg/L) | Dominant entry route | Max PEC <sub>sed</sub> (µg/kg) |
|-----------------|-------------------|------------------------------|----------------------|--------------------------------|
| Step 1          |                   |                              |                      |                                |
| -               | -                 | 83.859                       | -                    | 3140.000                       |
| Step 2          |                   |                              |                      |                                |
| Northern Europe | Mar-May           | 16.619                       | -                    | 683.356                        |
| Northern Europe | Jun-Sep           | 16.619                       | -                    | 683.356                        |
| Northern Europe | Oct-Feb           | 37.443                       | -                    | 1590.000                       |
| Southern Europe | Mar-May           | 30.501                       | -                    | 1280.000                       |
| Southern Europe | Jun-Sep           | 23.560                       | -                    | 983.693                        |
| Southern Europe | Oct-Feb           | 30.501                       | -                    | 1280.000                       |
| Step 3          |                   |                              |                      |                                |
| D6              | Ditch             | 3.818                        | Drift                | 11.560                         |
| R4              | Stream            | 3.222                        | Runoff               | 24.630                         |

**FOCUS Step 1, 2, and 3 PEC<sub>sw</sub> and PEC<sub>sed</sub> for glyphosate following application to olives, early application (2 × 1440 g a.s./ha, with application interval of 28 days)**

| Scenario FOCUS  | Period/ Waterbody | Max PEC <sub>sw</sub> (µg/L) | Dominant entry route | Max PEC <sub>sed</sub> (µg/kg) |
|-----------------|-------------------|------------------------------|----------------------|--------------------------------|
| Step 1          |                   |                              |                      |                                |
| -               | -                 | 167.718                      | -                    | 6280.000                       |
| Step 2          |                   |                              |                      |                                |
| Northern Europe | Mar-May           | 30.666                       | -                    | 1270.000                       |
| Northern Europe | Jun-Sep           | 30.666                       | -                    | 1270.000                       |
| Northern Europe | Oct-Feb           | 69.948                       | -                    | 2970.000                       |
| Southern Europe | Mar-May           | 56.854                       | -                    | 2400.000                       |
| Southern Europe | Jun-Sep           | 43.760                       | -                    | 1840.000                       |
| Southern Europe | Oct-Feb           | 56.854                       | -                    | 2400.000                       |
| Step 3          |                   |                              |                      |                                |
| D6              | Ditch             | 3.265                        | Drift                | 18.720                         |
| R4              | Stream            | 8.714                        | Runoff               | 40.940                         |

**FOCUS Step 1, 2, and 3 PEC<sub>sw</sub> and PEC<sub>sed</sub> for glyphosate following application to olives, late application (1 × 1440 g a.s./ha)**

| Scenario FOCUS | Period/ Waterbody | Max PEC <sub>sw</sub> (µg/L) | Dominant entry route | Max PEC <sub>sed</sub> (µg/kg) |
|----------------|-------------------|------------------------------|----------------------|--------------------------------|
| Step 1         |                   |                              |                      |                                |
| -              | -                 | 83.859                       | -                    | 3140.000                       |
| Step 2         |                   |                              |                      |                                |

|                 |         |        |        |          |
|-----------------|---------|--------|--------|----------|
| Northern Europe | Mar-May | 16.619 | -      | 683.356  |
| Northern Europe | Jun-Sep | 16.619 | -      | 683.356  |
| Northern Europe | Oct-Feb | 37.443 | -      | 1590.000 |
| Southern Europe | Mar-May | 30.501 | -      | 1280.000 |
| Southern Europe | Jun-Sep | 23.560 | -      | 983.693  |
| Southern Europe | Oct-Feb | 30.501 | -      | 1280.000 |
| Step 3          |         |        |        |          |
| D6              | Ditch   | 3.822  | Drift  | 13.910   |
| R4              | Stream  | 3.675  | Runoff | 31.890   |

**FOCUS Step 1, 2, and 3 PEC<sub>sw</sub> and PEC<sub>sed</sub> for glyphosate following application to olives, late application (2 × 1440 g a.s./ha, with application interval of 28 days)**

| Scenario FOCUS  | Period/ Waterbody | Max PEC <sub>sw</sub> (µg/L) | Dominant entry route | Max PEC <sub>sed</sub> (µg/kg) |
|-----------------|-------------------|------------------------------|----------------------|--------------------------------|
| Step 1          |                   |                              |                      |                                |
| -               | -                 | 167.718                      | -                    | 6280.000                       |
| Step 2          |                   |                              |                      |                                |
| Northern Europe | Mar-May           | 30.666                       | -                    | 1270.000                       |
| Northern Europe | Jun-Sep           | 30.666                       | -                    | 1270.000                       |
| Northern Europe | Oct-Feb           | 69.948                       | -                    | 2970.000                       |
| Southern Europe | Mar-May           | 56.854                       | -                    | 2400.000                       |
| Southern Europe | Jun-Sep           | 43.760                       | -                    | 1840.000                       |
| Southern Europe | Oct-Feb           | 56.854                       | -                    | 2400.000                       |
| Step 3          |                   |                              |                      |                                |
| D6              | Ditch             | 3.281                        | Drift                | 21.090                         |
| R4              | Stream            | 6.773                        | Runoff               | 55.440                         |

**FOCUS Step 1, 2, and 3 PEC<sub>sw</sub> and PEC<sub>sed</sub> for glyphosate following application to vines, early, early application (1 × 1440 g a.s./ha)**

| Scenario FOCUS  | Period/ Waterbody | Max PEC <sub>sw</sub> (µg/L) | Dominant entry route | Max PEC <sub>sed</sub> (µg/kg) |
|-----------------|-------------------|------------------------------|----------------------|--------------------------------|
| Step 1          |                   |                              |                      |                                |
| -               | -                 | 83.859                       | -                    | 3140.000                       |
| Step 2          |                   |                              |                      |                                |
| Northern Europe | Mar-May           | 16.619                       | -                    | 683.356                        |
| Northern Europe | Jun-Sep           | 16.619                       | -                    | 683.356                        |
| Northern Europe | Oct-Feb           | 37.443                       | -                    | 1590.000                       |
| Southern Europe | Mar-May           | 30.501                       | -                    | 1280.000                       |
| Southern Europe | Jun-Sep           | 23.560                       | -                    | 983.693                        |
| Southern Europe | Oct-Feb           | 30.501                       | -                    | 1280.000                       |
| Step 3          |                   |                              |                      |                                |
| D6              | Ditch             | 3.805                        | Drift                | 5.053                          |
| R1              | Pond              | 0.240                        | Drift                | 3.883                          |
| R1              | Stream            | 2.626                        | Drift                | 3.581                          |
| R2              | Stream            | 3.458                        | Drift                | 15.110                         |
| R3              | Stream            | 3.675                        | Drift                | 3.807                          |
| R4              | Stream            | 3.062                        | Runoff               | 20.500                         |

**FOCUS Step 1, 2, and 3 PEC<sub>sw</sub> and PEC<sub>sed</sub> for glyphosate following application to vines, early, early application (2 × 1440 g a.s./ha, with application interval of 28 days)**

| Scenario FOCUS  | Period/ Waterbody | Max PEC <sub>sw</sub> (µg/L) | Dominant entry route | Max PEC <sub>sed</sub> (µg/kg) |
|-----------------|-------------------|------------------------------|----------------------|--------------------------------|
| Step 1          |                   |                              |                      |                                |
| -               | -                 | 167.718                      | -                    | 6280.000                       |
| Step 2          |                   |                              |                      |                                |
| Northern Europe | Mar-May           | 30.666                       | -                    | 1270.000                       |
| Northern Europe | Jun-Sep           | 30.666                       | -                    | 1270.000                       |
| Northern Europe | Oct-Feb           | 69.948                       | -                    | 2970.000                       |

|                 |         |        |        |          |
|-----------------|---------|--------|--------|----------|
| Southern Europe | Mar-May | 56.854 | -      | 2400.000 |
| Southern Europe | Jun-Sep | 43.760 | -      | 1840.000 |
| Southern Europe | Oct-Feb | 56.854 | -      | 2400.000 |
| Step 3          |         |        |        |          |
| D6              | Ditch   | 3.249  | Drift  | 14.810   |
| R1              | Pond    | 0.249  | Drift  | 6.561    |
| R1              | Stream  | 3.311  | Runoff | 7.697    |
| R2              | Stream  | 2.914  | Drift  | 26.080   |
| R3              | Stream  | 3.105  | Drift  | 6.279    |
| R4              | Stream  | 8.306  | Runoff | 34.980   |

**FOCUS Step 1, 2, and 3 PEC<sub>sw</sub> and PEC<sub>sed</sub> for glyphosate following application to vines, early, late application (1 × 1440 g a.s./ha)**

| Scenario FOCUS  | Period/ Waterbody | Max PEC <sub>sw</sub> (µg/L) | Dominant entry route | Max PEC <sub>sed</sub> (µg/kg) |
|-----------------|-------------------|------------------------------|----------------------|--------------------------------|
| Step 1          |                   |                              |                      |                                |
| -               | -                 | 83.859                       | -                    | 3140.000                       |
| Step 2          |                   |                              |                      |                                |
| Northern Europe | Mar-May           | 16.619                       | -                    | 683.356                        |
| Northern Europe | Jun-Sep           | 16.619                       | -                    | 683.356                        |
| Northern Europe | Oct-Feb           | 37.443                       | -                    | 1590.000                       |
| Southern Europe | Mar-May           | 30.501                       | -                    | 1280.000                       |
| Southern Europe | Jun-Sep           | 23.560                       | -                    | 983.693                        |
| Southern Europe | Oct-Feb           | 30.501                       | -                    | 1280.000                       |
| Step 3          |                   |                              |                      |                                |
| D6              | Ditch             | 3.822                        | Drift                | 13.910                         |
| R1              | Pond              | 0.250                        | Drift                | 5.732                          |
| R1              | Stream            | 2.629                        | Drift                | 5.581                          |
| R2              | Stream            | 3.530                        | Drift                | 54.560                         |
| R3              | Stream            | 3.714                        | Drift                | 61.100                         |
| R4              | Stream            | 3.505                        | Runoff               | 28.410                         |

**FOCUS Step 1, 2, and 3 PEC<sub>sw</sub> and PEC<sub>sed</sub> for glyphosate following application to vines, early, late application (2 × 1440 g a.s./ha, with application interval of 28 days)**

| Scenario FOCUS  | Period/ Waterbody | Max PEC <sub>sw</sub> (µg/L) | Dominant entry route | Max PEC <sub>sed</sub> (µg/kg) |
|-----------------|-------------------|------------------------------|----------------------|--------------------------------|
| Step 1          |                   |                              |                      |                                |
| -               | -                 | 167.718                      | -                    | 6280.000                       |
| Step 2          |                   |                              |                      |                                |
| Northern Europe | Mar-May           | 30.666                       | -                    | 1270.000                       |
| Northern Europe | Jun-Sep           | 30.666                       | -                    | 1270.000                       |
| Northern Europe | Oct-Feb           | 69.948                       | -                    | 2970.000                       |
| Southern Europe | Mar-May           | 56.854                       | -                    | 2400.000                       |
| Southern Europe | Jun-Sep           | 43.760                       | -                    | 1840.000                       |
| Southern Europe | Oct-Feb           | 56.854                       | -                    | 2400.000                       |
| Step 3          |                   |                              |                      |                                |
| D6              | Ditch             | 3.406                        | Drainage             | 21.120                         |
| R1              | Pond              | 0.283                        | Drift                | 10.770                         |
| R1              | Stream            | 4.123                        | Runoff               | 9.906                          |
| R2              | Stream            | 2.969                        | Drift                | 101.400                        |
| R3              | Stream            | 3.123                        | Drift                | 61.620                         |
| R4              | Stream            | 6.437                        | Runoff               | 49.080                         |

***PEC calculations for 1 x 540 g/ha***

**FOCUS Step 1, 2, and 3 PEC<sub>sw</sub> and PEC<sub>sed</sub> for glyphosate following application to vegetables, root, early application (1 × 540 g a.s./ha)**

| Scenario FOCUS  | Period/ Waterbody      | Max PEC <sub>sw</sub> (µg/L) | Dominant entry route | Max PEC <sub>sed</sub> (µg/kg) |
|-----------------|------------------------|------------------------------|----------------------|--------------------------------|
| Step 1          |                        |                              |                      |                                |
| -               | -                      | 31.447                       | -                    | 1180.000                       |
| Step 2          |                        |                              |                      |                                |
| Northern Europe | Mar-May                | 6.232                        | -                    | 256.259                        |
| Northern Europe | Jun-Sep                | 6.232                        | -                    | 256.259                        |
| Northern Europe | Oct-Feb                | 14.041                       | -                    | 594.700                        |
| Southern Europe | Mar-May                | 11.438                       | -                    | 481.526                        |
| Southern Europe | Jun-Sep                | 8.835                        | -                    | 368.885                        |
| Southern Europe | Oct-Feb                | 11.438                       | -                    | 481.526                        |
| Step 3          |                        |                              |                      |                                |
| D3              | Ditch                  | 3.347                        | Drift                | 2.188                          |
| D6              | Ditch                  | 3.321                        | Drift                | 1.291                          |
| R1              | Pond                   | 0.116                        | Runoff               | 8.727                          |
| R1              | Stream                 | 2.211                        | Drift                | 66.240                         |
| R2              | Stream                 | 2.895                        | Drift                | 530.500                        |
| R2              | Stream 2 <sup>nd</sup> | 2.971                        | Drift                | 424.300                        |
| R3              | Stream                 | 3.126                        | Drift                | 95.670                         |
| R4              | Stream                 | 2.184                        | Drift                | 42.850                         |

**FOCUS Step 1, 2, and 3 PEC<sub>sw</sub> and PEC<sub>sed</sub> for glyphosate following application to vegetables, root, late application (1 × 540 g a.s./ha)**

| Scenario FOCUS  | Period/ Waterbody      | Max PEC <sub>sw</sub> (µg/L) | Dominant entry route | Max PEC <sub>sed</sub> (µg/kg) |
|-----------------|------------------------|------------------------------|----------------------|--------------------------------|
| Step 1          |                        |                              |                      |                                |
| -               | -                      | 31.447                       | -                    | 1180.000                       |
| Step 2          |                        |                              |                      |                                |
| Northern Europe | Mar-May                | 6.232                        | -                    | 256.259                        |
| Northern Europe | Jun-Sep                | 6.232                        | -                    | 256.259                        |
| Northern Europe | Oct-Feb                | 14.041                       | -                    | 594.700                        |
| Southern Europe | Mar-May                | 11.438                       | -                    | 481.526                        |
| Southern Europe | Jun-Sep                | 8.835                        | -                    | 368.885                        |
| Southern Europe | Oct-Feb                | 11.438                       | -                    | 481.526                        |
| Step 3          |                        |                              |                      |                                |
| D3              | Ditch                  | 3.359                        | Drift                | 3.117                          |
| D6              | Ditch                  | 3.368                        | Drift                | 5.266                          |
| R1              | Pond                   | 0.273                        | Runoff               | 14.560                         |
| R1              | Stream                 | 2.212                        | Drift                | 127.100                        |
| R2              | Stream                 | 2.971                        | Drift                | 422.800                        |
| R2              | Stream 2 <sup>nd</sup> | 2.937                        | Drift                | 585.900                        |
| R3              | Stream                 | 3.125                        | Drift                | 68.620                         |
| R4              | Stream                 | 2.174                        | Drift                | 195.500                        |

**FOCUS Step 1, 2, and 3 PEC<sub>sw</sub> and PEC<sub>sed</sub> for glyphosate following application to potatoes, early application (1 × 540 g a.s./ha)**

| Scenario FOCUS  | Period/ Waterbody | Max PEC <sub>sw</sub> (µg/L) | Dominant entry route | Max PEC <sub>sed</sub> (µg/kg) |
|-----------------|-------------------|------------------------------|----------------------|--------------------------------|
| Step 1          |                   |                              |                      |                                |
| -               | -                 | 31.447                       | -                    | 1180.000                       |
| Step 2          |                   |                              |                      |                                |
| Northern Europe | Mar-May           | 6.232                        | -                    | 256.259                        |
| Northern Europe | Jun-Sep           | 6.232                        | -                    | 256.259                        |
| Northern Europe | Oct-Feb           | 14.041                       | -                    | 594.700                        |

|                 |                       |        |        |         |
|-----------------|-----------------------|--------|--------|---------|
| Southern Europe | Mar-May               | 11.438 | -      | 481.526 |
| Southern Europe | Jun-Sep               | 8.835  | -      | 368.885 |
| Southern Europe | Oct-Feb               | 11.438 | -      | 481.526 |
| Step 3          |                       |        |        |         |
| D3              | Ditch                 | 2.767  | Drift  | 1.918   |
| D4              | Pond                  | 0.108  | Drift  | 1.732   |
| D4              | Stream                | 2.214  | Drift  | 0.080   |
| D6              | Ditch                 | 2.737  | Drift  | 0.928   |
| D6              | Ditch 2 <sup>nd</sup> | 2.753  | Drift  | 1.269   |
| R1              | Pond                  | 0.116  | Runoff | 8.456   |
| R1              | Stream                | 1.916  | Drift  | 64.680  |
| R2              | Stream                | 2.477  | Drift  | 619.700 |
| R3              | Stream                | 2.709  | Drift  | 72.350  |

**FOCUS Step 1, 2, and 3 PEC<sub>sw</sub> and PEC<sub>sed</sub> for glyphosate following application to potatoes, late application (1 × 540 g a.s./ha)**

| Scenario FOCUS  | Period/ Waterbody     | Max PEC <sub>sw</sub> (µg/L) | Dominant entry route | Max PEC <sub>sed</sub> (µg/kg) |
|-----------------|-----------------------|------------------------------|----------------------|--------------------------------|
| Step 1          |                       |                              |                      |                                |
| -               | -                     | 31.447                       | -                    | 1180.000                       |
| Step 2          |                       |                              |                      |                                |
| Northern Europe | Mar-May               | 6.232                        | -                    | 256.259                        |
| Northern Europe | Jun-Sep               | 6.232                        | -                    | 256.259                        |
| Northern Europe | Oct-Feb               | 14.041                       | -                    | 594.700                        |
| Southern Europe | Mar-May               | 11.438                       | -                    | 481.526                        |
| Southern Europe | Jun-Sep               | 8.835                        | -                    | 368.885                        |
| Southern Europe | Oct-Feb               | 11.438                       | -                    | 481.526                        |
| Step 3          |                       |                              |                      |                                |
| D3              | Ditch                 | 2.765                        | Drift                | 1.812                          |
| D4              | Pond                  | 0.108                        | Drift                | 1.889                          |
| D4              | Stream                | 2.353                        | Drift                | 0.148                          |
| D6              | Ditch                 | 2.786                        | Drift                | 5.842                          |
| D6              | Ditch 2 <sup>nd</sup> | 2.794                        | Drift                | 10.440                         |
| R1              | Pond                  | 0.318                        | Runoff               | 17.070                         |
| R1              | Stream                | 1.917                        | Drift                | 147.800                        |
| R2              | Stream                | 2.575                        | Drift                | 496.300                        |
| R3              | Stream                | 2.705                        | Drift                | 292.500                        |

**FOCUS Step 1, 2, and 3 PEC<sub>sw</sub> and PEC<sub>sed</sub> for glyphosate following application to vegetables, bulb, early application (1 × 540 g a.s./ha)**

| Scenario FOCUS  | Period/ Waterbody     | Max PEC <sub>sw</sub> (µg/L) | Dominant entry route | Max PEC <sub>sed</sub> (µg/kg) |
|-----------------|-----------------------|------------------------------|----------------------|--------------------------------|
| Step 1          |                       |                              |                      |                                |
| -               | -                     | 31.447                       | -                    | 1180.000                       |
| Step 2          |                       |                              |                      |                                |
| Northern Europe | Mar-May               | 6.232                        | -                    | 256.259                        |
| Northern Europe | Jun-Sep               | 6.232                        | -                    | 256.259                        |
| Northern Europe | Oct-Feb               | 14.041                       | -                    | 594.700                        |
| Southern Europe | Mar-May               | 11.438                       | -                    | 481.526                        |
| Southern Europe | Jun-Sep               | 8.835                        | -                    | 368.885                        |
| Southern Europe | Oct-Feb               | 11.438                       | -                    | 481.526                        |
| Step 3          |                       |                              |                      |                                |
| D3              | Ditch                 | 3.347                        | Drift                | 2.190                          |
| D4              | Pond                  | 0.111                        | Drift                | 1.783                          |
| D4              | Stream                | 2.444                        | Drift                | 0.068                          |
| D6              | Ditch                 | 3.343                        | Drift                | 1.928                          |
| D6              | Ditch 2 <sup>nd</sup> | 3.383                        | Drift                | 12.160                         |
| R1              | Pond                  | 0.118                        | Runoff               | 8.860                          |



|    |        |       |       |         |
|----|--------|-------|-------|---------|
| R1 | Stream | 2.211 | Drift | 68.440  |
| R2 | Stream | 2.895 | Drift | 533.100 |
| R3 | Stream | 3.125 | Drift | 88.210  |
| R4 | Stream | 2.183 | Drift | 42.880  |

**FOCUS Step 1, 2, and 3 PEC<sub>sw</sub> and PEC<sub>sed</sub> for glyphosate following application to vegetables, bulb, late application (1 × 540 g a.s./ha)**

| Scenario FOCUS  | Period/ Waterbody     | Max PEC <sub>sw</sub> (µg/L) | Dominant entry route | Max PEC <sub>sed</sub> (µg/kg) |
|-----------------|-----------------------|------------------------------|----------------------|--------------------------------|
| Step 1          |                       |                              |                      |                                |
| -               | -                     | 31.447                       | -                    | 1180.000                       |
| Step 2          |                       |                              |                      |                                |
| Northern Europe | Mar-May               | 6.232                        | -                    | 256.259                        |
| Northern Europe | Jun-Sep               | 6.232                        | -                    | 256.259                        |
| Northern Europe | Oct-Feb               | 14.041                       | -                    | 594.700                        |
| Southern Europe | Mar-May               | 11.438                       | -                    | 481.526                        |
| Southern Europe | Jun-Sep               | 8.835                        | -                    | 368.885                        |
| Southern Europe | Oct-Feb               | 11.438                       | -                    | 481.526                        |
| Step 3          |                       |                              |                      |                                |
| D3              | Ditch                 | 3.345                        | Drift                | 2.073                          |
| D4              | Pond                  | 0.111                        | Drift                | 1.937                          |
| D4              | Stream                | 2.645                        | Drift                | 0.134                          |
| D6              | Ditch                 | 3.383                        | Drift                | 12.010                         |
| D6              | Ditch 2 <sup>nd</sup> | 3.281                        | Drift                | 0.701                          |
| R1              | Pond                  | 0.306                        | Runoff               | 16.230                         |
| R1              | Stream                | 2.212                        | Drift                | 146.000                        |
| R2              | Stream                | 2.971                        | Drift                | 408.700                        |
| R3              | Stream                | 3.120                        | Drift                | 124.400                        |
| R4              | Stream                | 2.212                        | Drift                | 135.300                        |

**FOCUS Step 1, 2, and 3 PEC<sub>sw</sub> and PEC<sub>sed</sub> for glyphosate following application to vegetables, fruiting, early application (1 × 540 g a.s./ha)**

| Scenario FOCUS  | Period/ Waterbody | Max PEC <sub>sw</sub> (µg/L) | Dominant entry route | Max PEC <sub>sed</sub> (µg/kg) |
|-----------------|-------------------|------------------------------|----------------------|--------------------------------|
| Step 1          |                   |                              |                      |                                |
| -               | -                 | 31.447                       | -                    | 1180.000                       |
| Step 2          |                   |                              |                      |                                |
| Northern Europe | Mar-May           | 6.232                        | -                    | 256.259                        |
| Northern Europe | Jun-Sep           | 6.232                        | -                    | 256.259                        |
| Northern Europe | Oct-Feb           | 14.041                       | -                    | 594.700                        |
| Southern Europe | Mar-May           | 11.438                       | -                    | 481.526                        |
| Southern Europe | Jun-Sep           | 8.835                        | -                    | 368.885                        |
| Southern Europe | Oct-Feb           | 11.438                       | -                    | 481.526                        |
| Step 3          |                   |                              |                      |                                |
| D6              | Ditch             | 3.313                        | Drift                | 1.122                          |
| R2              | Stream            | 2.858                        | Drift                | 629.600                        |
| R3              | Stream            | 3.111                        | Drift                | 89.410                         |
| R4              | Stream            | 2.203                        | Drift                | 74.850                         |

**FOCUS Step 1, 2, and 3 PEC<sub>sw</sub> and PEC<sub>sed</sub> for glyphosate following application to vegetables, fruiting, late application (1 × 540 g a.s./ha)**

| Scenario FOCUS  | Period/ Waterbody | Max PEC <sub>sw</sub> (µg/L) | Dominant entry route | Max PEC <sub>sed</sub> (µg/kg) |
|-----------------|-------------------|------------------------------|----------------------|--------------------------------|
| Step 1          |                   |                              |                      |                                |
| -               | -                 | 31.447                       | -                    | 1180.000                       |
| Step 2          |                   |                              |                      |                                |
| Northern Europe | Mar-May           | 6.232                        | -                    | 256.259                        |
| Northern Europe | Jun-Sep           | 6.232                        | -                    | 256.259                        |

|                 |         |        |       |         |
|-----------------|---------|--------|-------|---------|
| Northern Europe | Oct-Feb | 14.041 | -     | 594.700 |
| Southern Europe | Mar-May | 11.438 | -     | 481.526 |
| Southern Europe | Jun-Sep | 8.835  | -     | 368.885 |
| Southern Europe | Oct-Feb | 11.438 | -     | 481.526 |
| Step 3          |         |        |       |         |
| D6              | Ditch   | 3.376  | Drift | 9.061   |
| R2              | Stream  | 2.971  | Drift | 715.300 |
| R3              | Stream  | 3.125  | Drift | 292.500 |
| R4              | Stream  | 2.212  | Drift | 185.300 |

**FOCUS Step 1, 2, and 3 PEC<sub>sw</sub> and PEC<sub>sed</sub> for glyphosate following application to vegetables, leafy, early application (1 × 540 g a.s./ha)**

| Scenario FOCUS  | Period/ Waterbody      | Max PEC <sub>sw</sub> (µg/L) | Dominant entry route | Max PEC <sub>sed</sub> (µg/kg) |
|-----------------|------------------------|------------------------------|----------------------|--------------------------------|
| Step 1          |                        |                              |                      |                                |
| -               | -                      | 31.447                       | -                    | 1180.000                       |
| Step 2          |                        |                              |                      |                                |
| Northern Europe | Mar-May                | 6.232                        | -                    | 256.259                        |
| Northern Europe | Jun-Sep                | 6.232                        | -                    | 256.259                        |
| Northern Europe | Oct-Feb                | 14.041                       | -                    | 594.700                        |
| Southern Europe | Mar-May                | 11.438                       | -                    | 481.526                        |
| Southern Europe | Jun-Sep                | 8.835                        | -                    | 368.885                        |
| Southern Europe | Oct-Feb                | 11.438                       | -                    | 481.526                        |
| Step 3          |                        |                              |                      |                                |
| D3              | Ditch                  | 3.347                        | Drift                | 2.168                          |
| D3              | Ditch 2 <sup>nd</sup>  | 3.356                        | Drift                | 2.791                          |
| D4              | Pond                   | 0.111                        | Drift                | 1.787                          |
| D4              | Stream                 | 2.554                        | Drift                | 0.093                          |
| D6              | Ditch                  | 3.383                        | Drift                | 12.090                         |
| R1              | Pond                   | 0.171                        | Runoff               | 14.290                         |
| R1              | Pond 2 <sup>nd</sup>   | 0.398                        | Runoff               | 20.180                         |
| R1              | Stream                 | 2.211                        | Drift                | 180.800                        |
| R1              | Stream 2 <sup>nd</sup> | 2.193                        | Drift                | 334.600                        |
| R2              | Stream                 | 2.895                        | Drift                | 533.500                        |
| R2              | Stream 2 <sup>nd</sup> | 2.971                        | Drift                | 375.100                        |
| R3              | Stream                 | 3.125                        | Drift                | 217.400                        |
| R3              | Stream 2 <sup>nd</sup> | 3.125                        | Drift                | 103.100                        |
| R4              | Stream                 | 2.184                        | Drift                | 81.580                         |
| R4              | Stream 2 <sup>nd</sup> | 2.172                        | Drift                | 254.400                        |

**FOCUS Step 1, 2, and 3 PEC<sub>sw</sub> and PEC<sub>sed</sub> for glyphosate following application to vegetables, leafy, late application (1 × 540 g a.s./ha)**

| Scenario FOCUS  | Period/ Waterbody     | Max PEC <sub>sw</sub> (µg/L) | Dominant entry route | Max PEC <sub>sed</sub> (µg/kg) |
|-----------------|-----------------------|------------------------------|----------------------|--------------------------------|
| Step 1          |                       |                              |                      |                                |
| -               | -                     | 31.447                       | -                    | 1180.000                       |
| Step 2          |                       |                              |                      |                                |
| Northern Europe | Mar-May               | 6.232                        | -                    | 256.259                        |
| Northern Europe | Jun-Sep               | 6.232                        | -                    | 256.259                        |
| Northern Europe | Oct-Feb               | 14.041                       | -                    | 594.700                        |
| Southern Europe | Mar-May               | 11.438                       | -                    | 481.526                        |
| Southern Europe | Jun-Sep               | 8.835                        | -                    | 368.885                        |
| Southern Europe | Oct-Feb               | 11.438                       | -                    | 481.526                        |
| Step 3          |                       |                              |                      |                                |
| D3              | Ditch                 | 3.358                        | Drift                | 3.057                          |
| D3              | Ditch 2 <sup>nd</sup> | 3.330                        | Drift                | 1.433                          |
| D4              | Pond                  | 0.111                        | Drift                | 1.944                          |
| D4              | Stream                | 2.698                        | Drift                | 0.159                          |

|    |                        |       |        |         |
|----|------------------------|-------|--------|---------|
| D6 | Ditch                  | 3.383 | Drift  | 12.530  |
| R1 | Pond                   | 0.254 | Runoff | 16.420  |
| R1 | Pond 2 <sup>nd</sup>   | 0.341 | Runoff | 19.550  |
| R1 | Stream                 | 2.176 | Drift  | 152.800 |
| R1 | Stream 2 <sup>nd</sup> | 2.210 | Drift  | 216.400 |
| R2 | Stream                 | 2.971 | Drift  | 568.200 |
| R2 | Stream 2 <sup>nd</sup> | 2.925 | Drift  | 630.200 |
| R3 | Stream                 | 3.125 | Drift  | 413.100 |
| R3 | Stream 2 <sup>nd</sup> | 3.118 | Drift  | 292.500 |
| R4 | Stream                 | 2.212 | Drift  | 214.300 |
| R4 | Stream 2 <sup>nd</sup> | 2.212 | Drift  | 294.500 |

**FOCUS Step 1, 2, and 3 PEC<sub>sw</sub> and PEC<sub>sed</sub> for glyphosate following application to sugar beets, early application (1 × 540 g a.s./ha)**

| Scenario FOCUS  | Period/ Waterbody | Max PEC <sub>sw</sub> (µg/L) | Dominant entry route | Max PEC <sub>sed</sub> (µg/kg) |
|-----------------|-------------------|------------------------------|----------------------|--------------------------------|
| Step 1          |                   |                              |                      |                                |
| -               | -                 | 31.447                       | -                    | 1180.000                       |
| Step 2          |                   |                              |                      |                                |
| Northern Europe | Mar-May           | 6.232                        | -                    | 256.259                        |
| Northern Europe | Jun-Sep           | 6.232                        | -                    | 256.259                        |
| Northern Europe | Oct-Feb           | 14.041                       | -                    | 594.700                        |
| Southern Europe | Mar-May           | 11.438                       | -                    | 481.526                        |
| Southern Europe | Jun-Sep           | 8.835                        | -                    | 368.885                        |
| Southern Europe | Oct-Feb           | 11.438                       | -                    | 481.526                        |
| Step 3          |                   |                              |                      |                                |
| D3              | Ditch             | 2.767                        | Drift                | 1.902                          |
| D4              | Pond              | 0.108                        | Drift                | 1.731                          |
| D4              | Stream            | 2.118                        | Drift                | 0.059                          |
| R1              | Pond              | 0.167                        | Drift                | 7.810                          |
| R1              | Stream            | 1.857                        | Drift                | 48.720                         |
| R3              | Stream            | 2.709                        | Drift                | 65.840                         |

**FOCUS Step 1, 2, and 3 PEC<sub>sw</sub> and PEC<sub>sed</sub> for glyphosate following application to sugar beets, late application (1 × 540 g a.s./ha)**

| Scenario FOCUS  | Period/ Waterbody | Max PEC <sub>sw</sub> (µg/L) | Dominant entry route | Max PEC <sub>sed</sub> (µg/kg) |
|-----------------|-------------------|------------------------------|----------------------|--------------------------------|
| Step 1          |                   |                              |                      |                                |
| -               | -                 | 31.447                       | -                    | 1180.000                       |
| Step 2          |                   |                              |                      |                                |
| Northern Europe | Mar-May           | 6.232                        | -                    | 256.259                        |
| Northern Europe | Jun-Sep           | 6.232                        | -                    | 256.259                        |
| Northern Europe | Oct-Feb           | 14.041                       | -                    | 594.700                        |
| Southern Europe | Mar-May           | 11.438                       | -                    | 481.526                        |
| Southern Europe | Jun-Sep           | 8.835                        | -                    | 368.885                        |
| Southern Europe | Oct-Feb           | 11.438                       | -                    | 481.526                        |
| Step 3          |                   |                              |                      |                                |
| D3              | Ditch             | 2.765                        | Drift                | 1.809                          |
| D4              | Pond              | 0.108                        | Drift                | 1.851                          |
| D4              | Stream            | 2.425                        | Drift                | 0.234                          |
| R1              | Pond              | 0.326                        | Runoff               | 16.200                         |
| R1              | Stream            | 1.917                        | Drift                | 164.300                        |
| R3              | Stream            | 2.702                        | Drift                | 292.500                        |

***PEC calculations for 1 x 1080 g/ha and 2 x 1080 g/ha*****FOCUS Step 1, 2, and 3 PEC<sub>sw</sub> and PEC<sub>sed</sub> for glyphosate following application to vegetables, root, early application (1 × 1080 g a.s./ha)**

| Scenario FOCUS  | Period/ Waterbody      | Max PEC <sub>sw</sub> (µg/L) | Dominant entry route | Max PEC <sub>sed</sub> (µg/kg) |
|-----------------|------------------------|------------------------------|----------------------|--------------------------------|
| Step 1          |                        |                              |                      |                                |
| -               | -                      | 62.894                       | -                    | 2350.000                       |
| Step 2          |                        |                              |                      |                                |
| Northern Europe | Mar-May                | 12.465                       | -                    | 512.517                        |
| Northern Europe | Jun-Sep                | 12.465                       | -                    | 512.517                        |
| Northern Europe | Oct-Feb                | 28.082                       | -                    | 1190.000                       |
| Southern Europe | Mar-May                | 22.876                       | -                    | 963.053                        |
| Southern Europe | Jun-Sep                | 17.670                       | -                    | 737.770                        |
| Southern Europe | Oct-Feb                | 22.876                       | -                    | 963.053                        |
| Step 3          |                        |                              |                      |                                |
| D3              | Ditch                  | 6.721                        | Drift                | 4.384                          |
| D6              | Ditch                  | 6.669                        | Drift                | 2.591                          |
| R1              | Pond                   | 0.264                        | Runoff               | 18.180                         |
| R1              | Stream                 | 4.442                        | Drift                | 103.800                        |
| R2              | Stream                 | 5.815                        | Drift                | 1003.500                       |
| R2              | Stream 2 <sup>nd</sup> | 5.967                        | Drift                | 784.200                        |
| R3              | Stream                 | 6.277                        | Drift                | 156.500                        |
| R4              | Stream                 | 4.388                        | Drift                | 64.510                         |

**FOCUS Step 1, 2, and 3 PEC<sub>sw</sub> and PEC<sub>sed</sub> for glyphosate following application to vegetables, root, early application (2 × 1080 g a.s./ha, with application interval of 28 days)**

| Scenario FOCUS  | Period/ Waterbody      | Max PEC <sub>sw</sub> (µg/L) | Dominant entry route | Max PEC <sub>sed</sub> (µg/kg) |
|-----------------|------------------------|------------------------------|----------------------|--------------------------------|
| Step 1          |                        |                              |                      |                                |
| -               | -                      | 125.789                      | -                    | 4710.000                       |
| Step 2          |                        |                              |                      |                                |
| Northern Europe | Mar-May                | 23.000                       | -                    | 952.489                        |
| Northern Europe | Jun-Sep                | 23.000                       | -                    | 952.489                        |
| Northern Europe | Oct-Feb                | 52.461                       | -                    | 2230.000                       |
| Southern Europe | Mar-May                | 42.640                       | -                    | 1800.000                       |
| Southern Europe | Jun-Sep                | 32.820                       | -                    | 1380.000                       |
| Southern Europe | Oct-Feb                | 42.640                       | -                    | 1800.000                       |
| Step 3          |                        |                              |                      |                                |
| D3              | Ditch                  | 5.870                        | Drift                | 6.130                          |
| D6              | Ditch                  | 5.928                        | Drift                | 20.040                         |
| R1              | Pond                   | 0.943                        | Runoff               | 41.210                         |
| R1              | Stream                 | 4.183                        | Runoff               | 245.600                        |
| R2              | Stream                 | 5.027                        | Drift                | 1866.000                       |
| R2              | Stream 2 <sup>nd</sup> | 5.157                        | Drift                | 991.600                        |
| R3              | Stream                 | 5.427                        | Drift                | 268.800                        |
| R4              | Stream                 | 5.145                        | Runoff               | 154.800                        |

**FOCUS Step 1, 2, and 3 PEC<sub>sw</sub> and PEC<sub>sed</sub> for glyphosate following application to vegetables, root, late application (1 × 1080 g a.s./ha)**

| Scenario FOCUS  | Period/ Waterbody | Max PEC <sub>sw</sub> (µg/L) | Dominant entry route | Max PEC <sub>sed</sub> (µg/kg) |
|-----------------|-------------------|------------------------------|----------------------|--------------------------------|
| Step 1          |                   |                              |                      |                                |
| -               | -                 | 62.894                       | -                    | 2350.000                       |
| Step 2          |                   |                              |                      |                                |
| Northern Europe | Mar-May           | 12.465                       | -                    | 512.517                        |
| Northern Europe | Jun-Sep           | 12.465                       | -                    | 512.517                        |
| Northern Europe | Oct-Feb           | 28.082                       | -                    | 1190.000                       |

|                 |                        |        |        |          |
|-----------------|------------------------|--------|--------|----------|
| Southern Europe | Mar-May                | 22.876 | -      | 963.053  |
| Southern Europe | Jun-Sep                | 17.670 | -      | 737.770  |
| Southern Europe | Oct-Feb                | 22.876 | -      | 963.053  |
| Step 3          |                        |        |        |          |
| D3              | Ditch                  | 6.745  | Drift  | 6.235    |
| D6              | Ditch                  | 6.763  | Drift  | 10.490   |
| R1              | Pond                   | 0.690  | Runoff | 30.320   |
| R1              | Stream                 | 4.445  | Drift  | 207.000  |
| R2              | Stream                 | 5.967  | Drift  | 787.100  |
| R2              | Stream 2 <sup>nd</sup> | 5.899  | Drift  | 1082.900 |
| R3              | Stream                 | 6.277  | Drift  | 116.200  |
| R4              | Stream                 | 4.368  | Drift  | 311.000  |

**FOCUS Step 1, 2, and 3 PEC<sub>sw</sub> and PEC<sub>sed</sub> for glyphosate following application to vegetables, root, late application (2 × 1080 g a.s./ha, with application interval of 28 days)**

| Scenario FOCUS  | Period/ Waterbody      | Max PEC <sub>sw</sub> (µg/L) | Dominant entry route | Max PEC <sub>sed</sub> (µg/kg) |
|-----------------|------------------------|------------------------------|----------------------|--------------------------------|
| Step 1          |                        |                              |                      |                                |
| -               | -                      | 125.789                      | -                    | 4710.000                       |
| Step 2          |                        |                              |                      |                                |
| Northern Europe | Mar-May                | 23.000                       | -                    | 952.489                        |
| Northern Europe | Jun-Sep                | 23.000                       | -                    | 952.489                        |
| Northern Europe | Oct-Feb                | 52.461                       | -                    | 2230.000                       |
| Southern Europe | Mar-May                | 42.640                       | -                    | 1800.000                       |
| Southern Europe | Jun-Sep                | 32.820                       | -                    | 1380.000                       |
| Southern Europe | Oct-Feb                | 42.640                       | -                    | 1800.000                       |
| Step 3          |                        |                              |                      |                                |
| D3              | Ditch                  | 5.890                        | Drift                | 7.755                          |
| D6              | Ditch                  | 5.956                        | Drift                | 26.970                         |
| R1              | Pond                   | 1.814                        | Runoff               | 66.350                         |
| R1              | Stream                 | 3.840                        | Drift                | 363.300                        |
| R2              | Stream                 | 5.156                        | Drift                | 1677.700                       |
| R2              | Stream 2 <sup>nd</sup> | 5.097                        | Drift                | 2078.800                       |
| R3              | Stream                 | 5.424                        | Drift                | 223.800                        |
| R4              | Stream                 | 3.945                        | Runoff               | 594.800                        |

**FOCUS Step 1, 2, and 3 PEC<sub>sw</sub> and PEC<sub>sed</sub> for glyphosate following application to potatoes, early application (1 × 1080 g a.s./ha)**

| Scenario FOCUS  | Period/ Waterbody     | Max PEC <sub>sw</sub> (µg/L) | Dominant entry route | Max PEC <sub>sed</sub> (µg/kg) |
|-----------------|-----------------------|------------------------------|----------------------|--------------------------------|
| Step 1          |                       |                              |                      |                                |
| -               | -                     | 62.894                       | -                    | 2350.000                       |
| Step 2          |                       |                              |                      |                                |
| Northern Europe | Mar-May               | 12.465                       | -                    | 512.517                        |
| Northern Europe | Jun-Sep               | 12.465                       | -                    | 512.517                        |
| Northern Europe | Oct-Feb               | 28.082                       | -                    | 1190.000                       |
| Southern Europe | Mar-May               | 22.876                       | -                    | 963.053                        |
| Southern Europe | Jun-Sep               | 17.670                       | -                    | 737.770                        |
| Southern Europe | Oct-Feb               | 22.876                       | -                    | 963.053                        |
| Step 3          |                       |                              |                      |                                |
| D3              | Ditch                 | 5.558                        | Drift                | 3.842                          |
| D4              | Pond                  | 0.218                        | Drift                | 3.385                          |
| D4              | Stream                | 4.448                        | Drift                | 0.162                          |
| D6              | Ditch                 | 5.498                        | Drift                | 1.874                          |
| D6              | Ditch 2 <sup>nd</sup> | 5.530                        | Drift                | 2.554                          |
| R1              | Pond                  | 0.265                        | Runoff               | 17.570                         |
| R1              | Stream                | 3.851                        | Drift                | 100.900                        |

|    |        |       |       |          |
|----|--------|-------|-------|----------|
| R2 | Stream | 4.976 | Drift | 1186.200 |
| R3 | Stream | 5.442 | Drift | 112.800  |

**FOCUS Step 1, 2, and 3 PEC<sub>sw</sub> and PEC<sub>sed</sub> for glyphosate following application to potatoes, early application (2 × 1080 g a.s./ha, with application interval of 28 days)**

| Scenario FOCUS  | Period/ Waterbody     | Max PEC <sub>sw</sub> (µg/L) | Dominant entry route | Max PEC <sub>sed</sub> (µg/kg) |
|-----------------|-----------------------|------------------------------|----------------------|--------------------------------|
| Step 1          |                       |                              |                      |                                |
| -               | -                     | 125.789                      | -                    | 4710.000                       |
| Step 2          |                       |                              |                      |                                |
| Northern Europe | Mar-May               | 23.000                       | -                    | 952.489                        |
| Northern Europe | Jun-Sep               | 23.000                       | -                    | 952.489                        |
| Northern Europe | Oct-Feb               | 52.461                       | -                    | 2230.000                       |
| Southern Europe | Mar-May               | 42.640                       | -                    | 1800.000                       |
| Southern Europe | Jun-Sep               | 32.820                       | -                    | 1380.000                       |
| Southern Europe | Oct-Feb               | 42.640                       | -                    | 1800.000                       |
| Step 3          |                       |                              |                      |                                |
| D3              | Ditch                 | 4.819                        | Drift                | 5.498                          |
| D4              | Pond                  | 0.241                        | Drift                | 5.348                          |
| D4              | Stream                | 3.825                        | Drift                | 0.410                          |
| D6              | Ditch                 | 4.766                        | Drift                | 2.343                          |
| D6              | Ditch 2 <sup>nd</sup> | 4.794                        | Drift                | 3.859                          |
| R1              | Pond                  | 1.126                        | Runoff               | 42.370                         |
| R1              | Stream                | 4.041                        | Runoff               | 237.500                        |
| R2              | Stream                | 4.337                        | Drift                | 1616.400                       |
| R3              | Stream                | 4.682                        | Drift                | 175.600                        |

**FOCUS Step 1, 2, and 3 PEC<sub>sw</sub> and PEC<sub>sed</sub> for glyphosate following application to potatoes, late application (1 × 1080 g a.s./ha)**

| Scenario FOCUS  | Period/ Waterbody     | Max PEC <sub>sw</sub> (µg/L) | Dominant entry route | Max PEC <sub>sed</sub> (µg/kg) |
|-----------------|-----------------------|------------------------------|----------------------|--------------------------------|
| Step 1          |                       |                              |                      |                                |
| -               | -                     | 62.894                       | -                    | 2350.000                       |
| Step 2          |                       |                              |                      |                                |
| Northern Europe | Mar-May               | 12.465                       | -                    | 512.517                        |
| Northern Europe | Jun-Sep               | 12.465                       | -                    | 512.517                        |
| Northern Europe | Oct-Feb               | 28.082                       | -                    | 1190.000                       |
| Southern Europe | Mar-May               | 22.876                       | -                    | 963.053                        |
| Southern Europe | Jun-Sep               | 17.670                       | -                    | 737.770                        |
| Southern Europe | Oct-Feb               | 22.876                       | -                    | 963.053                        |
| Step 3          |                       |                              |                      |                                |
| D3              | Ditch                 | 5.554                        | Drift                | 3.633                          |
| D4              | Pond                  | 0.218                        | Drift                | 3.785                          |
| D4              | Stream                | 4.728                        | Drift                | 0.344                          |
| D6              | Ditch                 | 5.596                        | Drift                | 11.610                         |
| D6              | Ditch 2 <sup>nd</sup> | 5.613                        | Drift                | 20.590                         |
| R1              | Pond                  | 0.808                        | Runoff               | 35.750                         |
| R1              | Stream                | 3.853                        | Drift                | 241.000                        |
| R2              | Stream                | 5.174                        | Drift                | 918.400                        |
| R3              | Stream                | 5.433                        | Drift                | 497.500                        |

**FOCUS Step 1, 2, and 3 PEC<sub>sw</sub> and PEC<sub>sed</sub> for glyphosate following application to potatoes, late application (2 × 1080 g a.s./ha, with application interval of 28 days)**

| Scenario FOCUS | Period/ Waterbody | Max PEC <sub>sw</sub> (µg/L) | Dominant entry route | Max PEC <sub>sed</sub> (µg/kg) |
|----------------|-------------------|------------------------------|----------------------|--------------------------------|
| Step 1         |                   |                              |                      |                                |
| -              | -                 | 125.789                      | -                    | 4710.000                       |
| Step 2         |                   |                              |                      |                                |

|                 |                       |        |        |          |
|-----------------|-----------------------|--------|--------|----------|
| Northern Europe | Mar-May               | 23.000 | -      | 952.489  |
| Northern Europe | Jun-Sep               | 23.000 | -      | 952.489  |
| Northern Europe | Oct-Feb               | 52.461 | -      | 2230.000 |
| Southern Europe | Mar-May               | 42.640 | -      | 1800.000 |
| Southern Europe | Jun-Sep               | 32.820 | -      | 1380.000 |
| Southern Europe | Oct-Feb               | 42.640 | -      | 1800.000 |
| Step 3          |                       |        |        |          |
| D3              | Ditch                 | 4.815  | Drift  | 4.817    |
| D4              | Pond                  | 0.249  | Drift  | 6.620    |
| D4              | Stream                | 4.067  | Drift  | 0.809    |
| D6              | Ditch                 | 4.851  | Drift  | 10.090   |
| D6              | Ditch 2 <sup>nd</sup> | 4.866  | Drift  | 17.930   |
| R1              | Pond                  | 2.094  | Runoff | 78.100   |
| R1              | Stream                | 4.127  | Runoff | 451.300  |
| R2              | Stream                | 4.451  | Drift  | 1741.800 |
| R3              | Stream                | 4.674  | Drift  | 885.300  |

**FOCUS Step 1, 2, and 3 PEC<sub>sw</sub> and PEC<sub>sed</sub> for glyphosate following application to vegetables, bulb, early application (1 × 1080 g a.s./ha)**

| Scenario FOCUS  | Period/ Waterbody     | Max PEC <sub>sw</sub> (µg/L) | Dominant entry route | Max PEC <sub>sed</sub> (µg/kg) |
|-----------------|-----------------------|------------------------------|----------------------|--------------------------------|
| Step 1          |                       |                              |                      |                                |
| -               | -                     | 62.894                       | -                    | 2350.000                       |
| Step 2          |                       |                              |                      |                                |
| Northern Europe | Mar-May               | 12.465                       | -                    | 512.517                        |
| Northern Europe | Jun-Sep               | 12.465                       | -                    | 512.517                        |
| Northern Europe | Oct-Feb               | 28.082                       | -                    | 1190.000                       |
| Southern Europe | Mar-May               | 22.876                       | -                    | 963.053                        |
| Southern Europe | Jun-Sep               | 17.670                       | -                    | 737.770                        |
| Southern Europe | Oct-Feb               | 22.876                       | -                    | 963.053                        |
| Step 3          |                       |                              |                      |                                |
| D3              | Ditch                 | 6.721                        | Drift                | 4.386                          |
| D4              | Pond                  | 0.225                        | Drift                | 3.480                          |
| D4              | Stream                | 4.910                        | Drift                | 0.137                          |
| D6              | Ditch                 | 6.713                        | Drift                | 3.882                          |
| D6              | Ditch 2 <sup>nd</sup> | 6.793                        | Drift                | 23.970                         |
| R1              | Pond                  | 0.267                        | Runoff               | 18.360                         |
| R1              | Stream                | 4.442                        | Drift                | 106.800                        |
| R2              | Stream                | 5.814                        | Drift                | 1006.900                       |
| R3              | Stream                | 6.276                        | Drift                | 143.400                        |
| R4              | Stream                | 4.386                        | Drift                | 64.290                         |

**FOCUS Step 1, 2, and 3 PEC<sub>sw</sub> and PEC<sub>sed</sub> for glyphosate following application to vegetables, bulb, early application (2 × 1080 g a.s./ha, with application interval of 28 days)**

| Scenario FOCUS  | Period/ Waterbody | Max PEC <sub>sw</sub> (µg/L) | Dominant entry route | Max PEC <sub>sed</sub> (µg/kg) |
|-----------------|-------------------|------------------------------|----------------------|--------------------------------|
| Step 1          |                   |                              |                      |                                |
| -               | -                 | 125.789                      | -                    | 4710.000                       |
| Step 2          |                   |                              |                      |                                |
| Northern Europe | Mar-May           | 23.000                       | -                    | 952.489                        |
| Northern Europe | Jun-Sep           | 23.000                       | -                    | 952.489                        |
| Northern Europe | Oct-Feb           | 52.461                       | -                    | 2230.000                       |
| Southern Europe | Mar-May           | 42.640                       | -                    | 1800.000                       |
| Southern Europe | Jun-Sep           | 32.820                       | -                    | 1380.000                       |
| Southern Europe | Oct-Feb           | 42.640                       | -                    | 1800.000                       |
| Step 3          |                   |                              |                      |                                |
| D3              | Ditch             | 5.870                        | Drift                | 6.134                          |
| D4              | Pond              | 0.237                        | Drift                | 5.612                          |

|    |                       |       |        |          |
|----|-----------------------|-------|--------|----------|
| D4 | Stream                | 4.497 | Drift  | 0.417    |
| D6 | Ditch                 | 5.862 | Drift  | 5.093    |
| D6 | Ditch 2 <sup>nd</sup> | 6.011 | Drift  | 35.060   |
| R1 | Pond                  | 0.953 | Runoff | 41.770   |
| R1 | Stream                | 4.202 | Runoff | 245.800  |
| R2 | Stream                | 5.027 | Drift  | 1869.200 |
| R3 | Stream                | 5.427 | Drift  | 248.000  |
| R4 | Stream                | 5.300 | Runoff | 91.110   |

**FOCUS Step 1, 2, and 3 PEC<sub>sw</sub> and PEC<sub>sed</sub> for glyphosate following application to vegetables, bulb, late application (1 × 1080 g a.s./ha)**

| Scenario FOCUS  | Period/ Waterbody     | Max PEC <sub>sw</sub> (µg/L) | Dominant entry route | Max PEC <sub>sed</sub> (µg/kg) |
|-----------------|-----------------------|------------------------------|----------------------|--------------------------------|
| Step 1          |                       |                              |                      |                                |
| -               | -                     | 62.894                       | -                    | 2350.000                       |
| Step 2          |                       |                              |                      |                                |
| Northern Europe | Mar-May               | 12.465                       | -                    | 512.517                        |
| Northern Europe | Jun-Sep               | 12.465                       | -                    | 512.517                        |
| Northern Europe | Oct-Feb               | 28.082                       | -                    | 1190.000                       |
| Southern Europe | Mar-May               | 22.876                       | -                    | 963.053                        |
| Southern Europe | Jun-Sep               | 17.670                       | -                    | 737.770                        |
| Southern Europe | Oct-Feb               | 22.876                       | -                    | 963.053                        |
| Step 3          |                       |                              |                      |                                |
| D3              | Ditch                 | 6.718                        | Drift                | 4.155                          |
| D4              | Pond                  | 0.225                        | Drift                | 3.893                          |
| D4              | Stream                | 5.314                        | Drift                | 0.324                          |
| D6              | Ditch                 | 6.793                        | Drift                | 23.680                         |
| D6              | Ditch 2 <sup>nd</sup> | 6.589                        | Drift                | 1.422                          |
| R1              | Pond                  | 0.775                        | Runoff               | 33.910                         |
| R1              | Stream                | 4.445                        | Drift                | 242.100                        |
| R2              | Stream                | 5.967                        | Drift                | 752.200                        |
| R3              | Stream                | 6.266                        | Drift                | 214.200                        |
| R4              | Stream                | 4.444                        | Drift                | 208.900                        |

**FOCUS Step 1, 2, and 3 PEC<sub>sw</sub> and PEC<sub>sed</sub> for glyphosate following application to vegetables, bulb, late application (2 × 1080 g a.s./ha, with application interval of 28 days)**

| Scenario FOCUS  | Period/ Waterbody     | Max PEC <sub>sw</sub> (µg/L) | Dominant entry route | Max PEC <sub>sed</sub> (µg/kg) |
|-----------------|-----------------------|------------------------------|----------------------|--------------------------------|
| Step 1          |                       |                              |                      |                                |
| -               | -                     | 125.789                      | -                    | 4710.000                       |
| Step 2          |                       |                              |                      |                                |
| Northern Europe | Mar-May               | 23.000                       | -                    | 952.489                        |
| Northern Europe | Jun-Sep               | 23.000                       | -                    | 952.489                        |
| Northern Europe | Oct-Feb               | 52.461                       | -                    | 2230.000                       |
| Southern Europe | Mar-May               | 42.640                       | -                    | 1800.000                       |
| Southern Europe | Jun-Sep               | 32.820                       | -                    | 1380.000                       |
| Southern Europe | Oct-Feb               | 42.640                       | -                    | 1800.000                       |
| Step 3          |                       |                              |                      |                                |
| D3              | Ditch                 | 5.866                        | Drift                | 5.898                          |
| D4              | Pond                  | 0.257                        | Drift                | 6.862                          |
| D4              | Stream                | 4.591                        | Drift                | 0.819                          |
| D6              | Ditch                 | 6.011                        | Drift                | 35.160                         |
| D6              | Ditch 2 <sup>nd</sup> | 5.908                        | Drift                | 10.510                         |
| R1              | Pond                  | 2.014                        | Runoff               | 74.010                         |
| R1              | Stream                | 3.954                        | Runoff               | 452.900                        |
| R2              | Stream                | 5.156                        | Drift                | 1572.000                       |
| R3              | Stream                | 5.424                        | Drift                | 472.400                        |
| R4              | Stream                | 4.999                        | Runoff               | 382.300                        |



**FOCUS Step 1, 2, and 3 PEC<sub>sw</sub> and PEC<sub>sed</sub> for glyphosate following application to vegetables, fruiting, early application (1 × 1080 g a.s./ha)**

| Scenario FOCUS  | Period/ Waterbody | Max PEC <sub>sw</sub> (µg/L) | Dominant entry route | Max PEC <sub>sed</sub> (µg/kg) |
|-----------------|-------------------|------------------------------|----------------------|--------------------------------|
| Step 1          |                   |                              |                      |                                |
| -               | -                 | 62.894                       | -                    | 2350.000                       |
| Step 2          |                   |                              |                      |                                |
| Northern Europe | Mar-May           | 12.465                       | -                    | 512.517                        |
| Northern Europe | Jun-Sep           | 12.465                       | -                    | 512.517                        |
| Northern Europe | Oct-Feb           | 28.082                       | -                    | 1190.000                       |
| Southern Europe | Mar-May           | 22.876                       | -                    | 963.053                        |
| Southern Europe | Jun-Sep           | 17.670                       | -                    | 737.770                        |
| Southern Europe | Oct-Feb           | 22.876                       | -                    | 963.053                        |
| Step 3          |                   |                              |                      |                                |
| D6              | Ditch             | 6.653                        | Drift                | 2.260                          |
| R2              | Stream            | 5.740                        | Drift                | 1202.800                       |
| R3              | Stream            | 6.248                        | Drift                | 168.100                        |
| R4              | Stream            | 4.426                        | Drift                | 106.900                        |

**FOCUS Step 1, 2, and 3 PEC<sub>sw</sub> and PEC<sub>sed</sub> for glyphosate following application to vegetables, fruiting, early application (2 × 1080 g a.s./ha, with application interval of 28 days)**

| Scenario FOCUS  | Period/ Waterbody | Max PEC <sub>sw</sub> (µg/L) | Dominant entry route | Max PEC <sub>sed</sub> (µg/kg) |
|-----------------|-------------------|------------------------------|----------------------|--------------------------------|
| Step 1          |                   |                              |                      |                                |
| -               | -                 | 125.789                      | -                    | 4710.000                       |
| Step 2          |                   |                              |                      |                                |
| Northern Europe | Mar-May           | 23.000                       | -                    | 952.489                        |
| Northern Europe | Jun-Sep           | 23.000                       | -                    | 952.489                        |
| Northern Europe | Oct-Feb           | 52.461                       | -                    | 2230.000                       |
| Southern Europe | Mar-May           | 42.640                       | -                    | 1800.000                       |
| Southern Europe | Jun-Sep           | 32.820                       | -                    | 1380.000                       |
| Southern Europe | Oct-Feb           | 42.640                       | -                    | 1800.000                       |
| Step 3          |                   |                              |                      |                                |
| D6              | Ditch             | 5.810                        | Drift                | 2.826                          |
| R2              | Stream            | 5.025                        | Drift                | 1636.200                       |
| R3              | Stream            | 5.425                        | Drift                | 225.800                        |
| R4              | Stream            | 6.236                        | Runoff               | 607.600                        |

**FOCUS Step 1, 2, and 3 PEC<sub>sw</sub> and PEC<sub>sed</sub> for glyphosate following application to vegetables, fruiting, late application (1 × 1080 g a.s./ha)**

| Scenario FOCUS  | Period/ Waterbody | Max PEC <sub>sw</sub> (µg/L) | Dominant entry route | Max PEC <sub>sed</sub> (µg/kg) |
|-----------------|-------------------|------------------------------|----------------------|--------------------------------|
| Step 1          |                   |                              |                      |                                |
| -               | -                 | 62.894                       | -                    | 2350.000                       |
| Step 2          |                   |                              |                      |                                |
| Northern Europe | Mar-May           | 12.465                       | -                    | 512.517                        |
| Northern Europe | Jun-Sep           | 12.465                       | -                    | 512.517                        |
| Northern Europe | Oct-Feb           | 28.082                       | -                    | 1190.000                       |
| Southern Europe | Mar-May           | 22.876                       | -                    | 963.053                        |
| Southern Europe | Jun-Sep           | 17.670                       | -                    | 737.770                        |
| Southern Europe | Oct-Feb           | 22.876                       | -                    | 963.053                        |
| Step 3          |                   |                              |                      |                                |
| D6              | Ditch             | 6.779                        | Drift                | 17.910                         |
| R2              | Stream            | 5.967                        | Drift                | 1311.600                       |
| R3              | Stream            | 6.276                        | Drift                | 497.400                        |
| R4              | Stream            | 4.444                        | Drift                | 289.300                        |

**FOCUS Step 1, 2, and 3 PEC<sub>sw</sub> and PEC<sub>sed</sub> for glyphosate following application to vegetables, fruiting, late application (2 × 1080 g a.s./ha, with application interval of 28 days)**

| Scenario FOCUS  | Period/ Waterbody | Max PEC <sub>sw</sub> (µg/L) | Dominant entry route | Max PEC <sub>sed</sub> (µg/kg) |
|-----------------|-------------------|------------------------------|----------------------|--------------------------------|
| Step 1          |                   |                              |                      |                                |
| -               | -                 | 125.789                      | -                    | 4710.000                       |
| Step 2          |                   |                              |                      |                                |
| Northern Europe | Mar-May           | 23.000                       | -                    | 952.489                        |
| Northern Europe | Jun-Sep           | 23.000                       | -                    | 952.489                        |
| Northern Europe | Oct-Feb           | 52.461                       | -                    | 2230.000                       |
| Southern Europe | Mar-May           | 42.640                       | -                    | 1800.000                       |
| Southern Europe | Jun-Sep           | 32.820                       | -                    | 1380.000                       |
| Southern Europe | Oct-Feb           | 42.640                       | -                    | 1800.000                       |
| Step 3          |                   |                              |                      |                                |
| D6              | Ditch             | 6.017                        | Drift                | 36.470                         |
| R2              | Stream            | 5.156                        | Drift                | 2597.700                       |
| R3              | Stream            | 5.423                        | Drift                | 885.200                        |
| R4              | Stream            | 5.824                        | Runoff               | 515.800                        |

**FOCUS Step 1, 2, and 3 PEC<sub>sw</sub> and PEC<sub>sed</sub> for glyphosate following application to vegetables, leafy, early application (1 × 1080 g a.s./ha)**

| Scenario FOCUS  | Period/ Waterbody      | Max PEC <sub>sw</sub> (µg/L) | Dominant entry route | Max PEC <sub>sed</sub> (µg/kg) |
|-----------------|------------------------|------------------------------|----------------------|--------------------------------|
| Step 1          |                        |                              |                      |                                |
| -               | -                      | 62.894                       | -                    | 2350.000                       |
| Step 2          |                        |                              |                      |                                |
| Northern Europe | Mar-May                | 12.465                       | -                    | 512.517                        |
| Northern Europe | Jun-Sep                | 12.465                       | -                    | 512.517                        |
| Northern Europe | Oct-Feb                | 28.082                       | -                    | 1190.000                       |
| Southern Europe | Mar-May                | 22.876                       | -                    | 963.053                        |
| Southern Europe | Jun-Sep                | 17.670                       | -                    | 737.770                        |
| Southern Europe | Oct-Feb                | 22.876                       | -                    | 963.053                        |
| Step 3          |                        |                              |                      |                                |
| D3              | Ditch                  | 6.721                        | Drift                | 4.342                          |
| D3              | Ditch 2 <sup>nd</sup>  | 6.739                        | Drift                | 5.585                          |
| D4              | Pond                   | 0.225                        | Drift                | 3.492                          |
| D4              | Stream                 | 5.131                        | Drift                | 0.186                          |
| D6              | Ditch                  | 6.793                        | Drift                | 23.840                         |
| R1              | Pond                   | 0.435                        | Runoff               | 28.700                         |
| R1              | Pond 2 <sup>nd</sup>   | 0.994                        | Runoff               | 42.280                         |
| R1              | Stream                 | 4.442                        | Drift                | 289.900                        |
| R1              | Stream 2 <sup>nd</sup> | 4.407                        | Drift                | 626.400                        |
| R2              | Stream                 | 5.815                        | Drift                | 1008.400                       |
| R2              | Stream 2 <sup>nd</sup> | 5.967                        | Drift                | 679.400                        |
| R3              | Stream                 | 6.277                        | Drift                | 355.300                        |
| R3              | Stream 2 <sup>nd</sup> | 6.277                        | Drift                | 188.400                        |
| R4              | Stream                 | 4.389                        | Drift                | 113.000                        |
| R4              | Stream 2 <sup>nd</sup> | 4.364                        | Drift                | 453.300                        |

**FOCUS Step 1, 2, and 3 PEC<sub>sw</sub> and PEC<sub>sed</sub> for glyphosate following application to vegetables, leafy, early application (2 × 1080 g a.s./ha, with application interval of 28 days)**

| Scenario FOCUS  | Period/ Waterbody      | Max PEC <sub>sw</sub> (µg/L) | Dominant entry route | Max PEC <sub>sed</sub> (µg/kg) |
|-----------------|------------------------|------------------------------|----------------------|--------------------------------|
| Step 1          |                        |                              |                      |                                |
| -               | -                      | 125.789                      | -                    | 4710.000                       |
| Step 2          |                        |                              |                      |                                |
| Northern Europe | Mar-May                | 23.000                       | -                    | 952.489                        |
| Northern Europe | Jun-Sep                | 23.000                       | -                    | 952.489                        |
| Northern Europe | Oct-Feb                | 52.461                       | -                    | 2230.000                       |
| Southern Europe | Mar-May                | 42.640                       | -                    | 1800.000                       |
| Southern Europe | Jun-Sep                | 32.820                       | -                    | 1380.000                       |
| Southern Europe | Oct-Feb                | 42.640                       | -                    | 1800.000                       |
| Step 3          |                        |                              |                      |                                |
| D3              | Ditch                  | 5.870                        | Drift                | 6.073                          |
| D3              | Ditch 2 <sup>nd</sup>  | 5.886                        | Drift                | 8.529                          |
| D4              | Pond                   | 0.221                        | Drift                | 5.549                          |
| D4              | Stream                 | 4.497                        | Drift                | 0.436                          |
| D6              | Ditch                  | 5.996                        | Drift                | 33.170                         |
| R1              | Pond                   | 1.063                        | Runoff               | 52.770                         |
| R1              | Pond 2 <sup>nd</sup>   | 1.537                        | Runoff               | 74.940                         |
| R1              | Stream                 | 4.148                        | Runoff               | 371.200                        |
| R1              | Stream 2 <sup>nd</sup> | 3.855                        | Drift                | 1012.600                       |
| R2              | Stream                 | 5.027                        | Drift                | 1872.000                       |
| R2              | Stream 2 <sup>nd</sup> | 5.162                        | Drift                | 987.500                        |
| R3              | Stream                 | 5.426                        | Drift                | 551.700                        |
| R3              | Stream 2 <sup>nd</sup> | 5.435                        | Drift                | 432.700                        |
| R4              | Stream                 | 5.023                        | Runoff               | 144.800                        |
| R4              | Stream 2 <sup>nd</sup> | 5.758                        | Runoff               | 856.300                        |

**FOCUS Step 1, 2, and 3 PEC<sub>sw</sub> and PEC<sub>sed</sub> for glyphosate following application to vegetables, leafy, late application (1 × 1080 g a.s./ha)**

| Scenario FOCUS  | Period/ Waterbody      | Max PEC <sub>sw</sub> (µg/L) | Dominant entry route | Max PEC <sub>sed</sub> (µg/kg) |
|-----------------|------------------------|------------------------------|----------------------|--------------------------------|
| Step 1          |                        |                              |                      |                                |
| -               | -                      | 62.894                       | -                    | 2350.000                       |
| Step 2          |                        |                              |                      |                                |
| Northern Europe | Mar-May                | 12.465                       | -                    | 512.517                        |
| Northern Europe | Jun-Sep                | 12.465                       | -                    | 512.517                        |
| Northern Europe | Oct-Feb                | 28.082                       | -                    | 1190.000                       |
| Southern Europe | Mar-May                | 22.876                       | -                    | 963.053                        |
| Southern Europe | Jun-Sep                | 17.670                       | -                    | 737.770                        |
| Southern Europe | Oct-Feb                | 22.876                       | -                    | 963.053                        |
| Step 3          |                        |                              |                      |                                |
| D3              | Ditch                  | 6.744                        | Drift                | 6.116                          |
| D3              | Ditch 2 <sup>nd</sup>  | 6.687                        | Drift                | 2.875                          |
| D4              | Pond                   | 0.225                        | Drift                | 3.904                          |
| D4              | Stream                 | 5.421                        | Drift                | 0.369                          |
| D6              | Ditch                  | 6.793                        | Drift                | 24.710                         |
| R1              | Pond                   | 0.650                        | Runoff               | 34.410                         |
| R1              | Pond 2 <sup>nd</sup>   | 0.868                        | Runoff               | 40.210                         |
| R1              | Stream                 | 4.373                        | Drift                | 254.000                        |
| R1              | Stream 2 <sup>nd</sup> | 4.440                        | Drift                | 354.700                        |
| R2              | Stream                 | 5.967                        | Drift                | 1061.100                       |
| R2              | Stream 2 <sup>nd</sup> | 5.876                        | Drift                | 1176.000                       |
| R3              | Stream                 | 6.276                        | Drift                | 767.500                        |
| R3              | Stream 2 <sup>nd</sup> | 6.261                        | Drift                | 497.200                        |
| R4              | Stream                 | 4.444                        | Drift                | 360.700                        |

|    |                        |       |       |         |
|----|------------------------|-------|-------|---------|
| R4 | Stream 2 <sup>nd</sup> | 4.444 | Drift | 476.100 |
|----|------------------------|-------|-------|---------|

**FOCUS Step 1, 2, and 3 PEC<sub>sw</sub> and PEC<sub>sed</sub> for glyphosate following application to vegetables, leafy, late application (2 × 1080 g a.s./ha, with application interval of 28 days)**

| Scenario FOCUS  | Period/ Waterbody      | Max PEC <sub>sw</sub> (µg/L) | Dominant entry route | Max PEC <sub>sed</sub> (µg/kg) |
|-----------------|------------------------|------------------------------|----------------------|--------------------------------|
| Step 1          |                        |                              |                      |                                |
| -               | -                      | 125.789                      | -                    | 4710.000                       |
| Step 2          |                        |                              |                      |                                |
| Northern Europe | Mar-May                | 23.000                       | -                    | 952.489                        |
| Northern Europe | Jun-Sep                | 23.000                       | -                    | 952.489                        |
| Northern Europe | Oct-Feb                | 52.461                       | -                    | 2230.000                       |
| Southern Europe | Mar-May                | 42.640                       | -                    | 1800.000                       |
| Southern Europe | Jun-Sep                | 32.820                       | -                    | 1380.000                       |
| Southern Europe | Oct-Feb                | 42.640                       | -                    | 1800.000                       |
| Step 3          |                        |                              |                      |                                |
| D3              | Ditch                  | 5.889                        | Drift                | 6.417                          |
| D3              | Ditch 2 <sup>nd</sup>  | 5.846                        | Drift                | 4.775                          |
| D4              | Pond                   | 0.258                        | Drift                | 6.790                          |
| D4              | Stream                 | 4.684                        | Drift                | 0.880                          |
| D6              | Ditch                  | 5.932                        | Drift                | 21.670                         |
| R1              | Pond                   | 1.758                        | Runoff               | 76.920                         |
| R1              | Pond 2 <sup>nd</sup>   | 2.164                        | Runoff               | 82.350                         |
| R1              | Stream                 | 3.841                        | Drift                | 466.200                        |
| R1              | Stream 2 <sup>nd</sup> | 4.336                        | Runoff               | 557.100                        |
| R2              | Stream                 | 5.156                        | Drift                | 1906.000                       |
| R2              | Stream 2 <sup>nd</sup> | 5.077                        | Drift                | 2161.800                       |
| R3              | Stream                 | 5.480                        | Drift                | 1522.500                       |
| R3              | Stream 2 <sup>nd</sup> | 5.410                        | Drift                | 885.000                        |
| R4              | Stream                 | 5.282                        | Runoff               | 683.800                        |
| R4              | Stream 2 <sup>nd</sup> | 5.492                        | Runoff               | 935.600                        |

**FOCUS Step 1, 2, and 3 PEC<sub>sw</sub> and PEC<sub>sed</sub> for glyphosate following application to sugar beets, early application (1 × 1080 g a.s./ha)**

| Scenario FOCUS  | Period/ Waterbody | Max PEC <sub>sw</sub> (µg/L) | Dominant entry route | Max PEC <sub>sed</sub> (µg/kg) |
|-----------------|-------------------|------------------------------|----------------------|--------------------------------|
| Step 1          |                   |                              |                      |                                |
| -               | -                 | 62.894                       | -                    | 2350.000                       |
| Step 2          |                   |                              |                      |                                |
| Northern Europe | Mar-May           | 12.465                       | -                    | 512.517                        |
| Northern Europe | Jun-Sep           | 12.465                       | -                    | 512.517                        |
| Northern Europe | Oct-Feb           | 28.082                       | -                    | 1190.000                       |
| Southern Europe | Mar-May           | 22.876                       | -                    | 963.053                        |
| Southern Europe | Jun-Sep           | 17.670                       | -                    | 737.770                        |
| Southern Europe | Oct-Feb           | 22.876                       | -                    | 963.053                        |
| Step 3          |                   |                              |                      |                                |
| D3              | Ditch             | 5.557                        | Drift                | 3.811                          |
| D4              | Pond              | 0.218                        | Drift                | 3.378                          |
| D4              | Stream            | 4.257                        | Drift                | 0.119                          |
| R1              | Pond              | 0.367                        | Drift                | 16.370                         |
| R1              | Stream            | 3.731                        | Drift                | 79.280                         |
| R3              | Stream            | 5.442                        | Drift                | 107.200                        |

**FOCUS Step 1, 2, and 3 PEC<sub>sw</sub> and PEC<sub>sed</sub> for glyphosate following application to sugar beets, early application (2 × 1080 g a.s./ha, with application interval of 28 days)**

| Scenario FOCUS  | Period/ Waterbody | Max PEC <sub>sw</sub> (µg/L) | Dominant entry route | Max PEC <sub>sed</sub> (µg/kg) |
|-----------------|-------------------|------------------------------|----------------------|--------------------------------|
| Step 1          |                   |                              |                      |                                |
| -               | -                 | 125.789                      | -                    | 4710.000                       |
| Step 2          |                   |                              |                      |                                |
| Northern Europe | Mar-May           | 23.000                       | -                    | 952.489                        |
| Northern Europe | Jun-Sep           | 23.000                       | -                    | 952.489                        |
| Northern Europe | Oct-Feb           | 52.461                       | -                    | 2230.000                       |
| Southern Europe | Mar-May           | 42.640                       | -                    | 1800.000                       |
| Southern Europe | Jun-Sep           | 32.820                       | -                    | 1380.000                       |
| Southern Europe | Oct-Feb           | 42.640                       | -                    | 1800.000                       |
| Step 3          |                   |                              |                      |                                |
| D3              | Ditch             | 4.818                        | Drift                | 5.351                          |
| D4              | Pond              | 0.229                        | Drift                | 5.442                          |
| D4              | Stream            | 3.881                        | Drift                | 0.310                          |
| R1              | Pond              | 0.997                        | Runoff               | 41.810                         |
| R1              | Stream            | 4.166                        | Runoff               | 239.900                        |
| R3              | Stream            | 4.682                        | Drift                | 168.000                        |

**FOCUS Step 1, 2, and 3 PEC<sub>sw</sub> and PEC<sub>sed</sub> for glyphosate following application to sugar beets, late application (1 × 1080 g a.s./ha)**

| Scenario FOCUS  | Period/ Waterbody | Max PEC <sub>sw</sub> (µg/L) | Dominant entry route | Max PEC <sub>sed</sub> (µg/kg) |
|-----------------|-------------------|------------------------------|----------------------|--------------------------------|
| Step 1          |                   |                              |                      |                                |
| -               | -                 | 62.894                       | -                    | 2350.000                       |
| Step 2          |                   |                              |                      |                                |
| Northern Europe | Mar-May           | 12.465                       | -                    | 512.517                        |
| Northern Europe | Jun-Sep           | 12.465                       | -                    | 512.517                        |
| Northern Europe | Oct-Feb           | 28.082                       | -                    | 1190.000                       |
| Southern Europe | Mar-May           | 22.876                       | -                    | 963.053                        |
| Southern Europe | Jun-Sep           | 17.670                       | -                    | 737.770                        |
| Southern Europe | Oct-Feb           | 22.876                       | -                    | 963.053                        |
| Step 3          |                   |                              |                      |                                |
| D3              | Ditch             | 5.555                        | Drift                | 3.627                          |
| D4              | Pond              | 0.218                        | Drift                | 3.706                          |
| D4              | Stream            | 4.871                        | Drift                | 0.492                          |
| R1              | Pond              | 0.832                        | Runoff               | 34.130                         |
| R1              | Stream            | 3.853                        | Drift                | 284.300                        |
| R3              | Stream            | 5.428                        | Drift                | 497.500                        |

**FOCUS Step 1, 2, and 3 PEC<sub>sw</sub> and PEC<sub>sed</sub> for glyphosate following application to sugar beets, late application (2 × 1080 g a.s./ha, with application interval of 28 days)**

| Scenario FOCUS  | Period/ Waterbody | Max PEC <sub>sw</sub> (µg/L) | Dominant entry route | Max PEC <sub>sed</sub> (µg/kg) |
|-----------------|-------------------|------------------------------|----------------------|--------------------------------|
| Step 1          |                   |                              |                      |                                |
| -               | -                 | 125.789                      | -                    | 4710.000                       |
| Step 2          |                   |                              |                      |                                |
| Northern Europe | Mar-May           | 23.000                       | -                    | 952.489                        |
| Northern Europe | Jun-Sep           | 23.000                       | -                    | 952.489                        |
| Northern Europe | Oct-Feb           | 52.461                       | -                    | 2230.000                       |
| Southern Europe | Mar-May           | 42.640                       | -                    | 1800.000                       |
| Southern Europe | Jun-Sep           | 32.820                       | -                    | 1380.000                       |
| Southern Europe | Oct-Feb           | 42.640                       | -                    | 1800.000                       |
| Step 3          |                   |                              |                      |                                |
| D3              | Ditch             | 4.815                        | Drift                | 5.332                          |
| D4              | Pond              | 0.253                        | Drift                | 5.943                          |

|    |        |       |        |         |
|----|--------|-------|--------|---------|
| D4 | Stream | 4.255 | Drift  | 1.183   |
| R1 | Pond   | 2.145 | Runoff | 72.770  |
| R1 | Stream | 4.299 | Runoff | 505.000 |
| R3 | Stream | 4.669 | Drift  | 885.500 |

***PEC calculations for 1 x 1800 g/ha*****FOCUS Step 1, 2, and 3 PEC<sub>sw</sub> and PEC<sub>sed</sub> for glyphosate following application to grass/alfalfa, early application (1 × 1800 g a.s./ha)**

| Scenario FOCUS  | Period/ Waterbody | Max PEC <sub>sw</sub> (µg/L) | Dominant entry route | Max PEC <sub>sed</sub> (µg/kg) |
|-----------------|-------------------|------------------------------|----------------------|--------------------------------|
| Step 1 Tier 1   |                   |                              |                      |                                |
| -               | -                 | 104.824                      | -                    | 3920.000                       |
| Step 2 Tier 1   |                   |                              |                      |                                |
| Northern Europe | Mar-May           | 20.774                       | -                    | 854.196                        |
| Northern Europe | Jun-Sep           | 20.774                       | -                    | 854.196                        |
| Northern Europe | Oct-Feb           | 46.803                       | -                    | 1980.000                       |
| Southern Europe | Mar-May           | 38.127                       | -                    | 1610.000                       |
| Southern Europe | Jun-Sep           | 29.451                       | -                    | 1230.000                       |
| Southern Europe | Oct-Feb           | 38.127                       | -                    | 1610.000                       |
| Step 3          |                   |                              |                      |                                |
| D1              | Ditch             | 11.290                       | Drift                | 16.390                         |
| D1              | Stream            | 8.835                        | Drift                | 0.403                          |
| D2              | Ditch             | 11.400                       | Drift                | 44.540                         |
| D2              | Stream            | 10.130                       | Drift                | 39.440                         |
| D3              | Ditch             | 11.250                       | Drift                | 8.796                          |
| D4              | Pond              | 0.378                        | Drift                | 5.813                          |
| D4              | Stream            | 8.594                        | Drift                | 0.316                          |
| D5              | Pond              | 0.378                        | Drift                | 6.044                          |
| D5              | Stream            | 9.276                        | Drift                | 0.347                          |
| R2              | Stream            | 9.792                        | Drift                | 3.240                          |
| R3              | Stream            | 10.430                       | Drift                | 4.223                          |

**FOCUS Step 1, 2, and 3 PEC<sub>sw</sub> and PEC<sub>sed</sub> for glyphosate following application to grass/alfalfa, late application (1 × 1800 g a.s./ha)**

| Scenario FOCUS  | Period/ Waterbody | Max PEC <sub>sw</sub> (µg/L) | Dominant entry route | Max PEC <sub>sed</sub> (µg/kg) |
|-----------------|-------------------|------------------------------|----------------------|--------------------------------|
| Step 1 Tier 1   |                   |                              |                      |                                |
| -               | -                 | 104.824                      | -                    | 3920.000                       |
| Step 2 Tier 1   |                   |                              |                      |                                |
| Northern Europe | Mar-May           | 20.774                       | -                    | 854.196                        |
| Northern Europe | Jun-Sep           | 20.774                       | -                    | 854.196                        |
| Northern Europe | Oct-Feb           | 46.803                       | -                    | 1980.000                       |
| Southern Europe | Mar-May           | 38.127                       | -                    | 1610.000                       |
| Southern Europe | Jun-Sep           | 29.451                       | -                    | 1230.000                       |
| Southern Europe | Oct-Feb           | 38.127                       | -                    | 1610.000                       |
| Step 3          |                   |                              |                      |                                |
| D1              | Ditch             | 11.380                       | Drift                | 64.820                         |
| D1              | Stream            | 9.951                        | Drift                | 6.614                          |
| D2              | Ditch             | 11.400                       | Drift                | 62.270                         |
| D2              | Stream            | 10.130                       | Drift                | 48.490                         |
| D3              | Ditch             | 11.290                       | Drift                | 12.590                         |
| D4              | Pond              | 0.378                        | Drift                | 6.426                          |
| D4              | Stream            | 9.723                        | Drift                | 2.158                          |
| D5              | Pond              | 0.378                        | Drift                | 6.386                          |
| D5              | Stream            | 10.490                       | Drift                | 3.064                          |
| R2              | Stream            | 9.925                        | Drift                | 12.970                         |
| R3              | Stream            | 10.470                       | Drift                | 16.560                         |

Metabolite AMPA

Parameters used in FOCUS<sub>sw</sub> step 1 and 2

Molecular weight (g/mol): 111.04  
 Soil and water metabolite  
 Koc (mL/g): 2541 (geometric mean, n = 8)  
 DT<sub>50</sub> soil (d): 1040 (max laboratory normalized DT<sub>50</sub>, n=10, to take into account pH-dependence)  
 DT<sub>50</sub> water/sediment/ system (d): 89.9 (geometric mean, total system, n = 7) (*correct value for future calculations: 93.1 d*)  
 Maximum occurrence observed (% molar basis with respect to the parent)  
 Total Water and Sediment: 27.1  
 Soil: 63.0 (*correct value for future calculations: 48.8*)  
*Should a refinement be needed, recommended soil DT50 for AMPA for Tier 2 PEC<sub>sw</sub> calculations are:*  
 Soil pH<sub>water</sub> ≤ 6.5: DT<sub>50</sub> 663 d (geomean, n=4)  
 Soil pH<sub>water</sub> > 6.5: DT<sub>50</sub> 43.0 d (geomean, n=5)

Application rate

Crop and growth stage: Root vegetable, Potatoes, Bulb vegetable, Fruiting vegetable, Leafy vegetable, Sugar beet  
 Application rate(s): 1x540, 3x720, 2x1080, 1x1440 g a.s./ha  
 Interval (d): 28  
 Crop interception (%) : no interception  
 Application window: Northern and Southern Europe, Mar-May, Jun-Sept, Oct-Feb

Crop and growth stage: Pome/stone fruits, Olives, Vines (Grass/Alfalfa was used as surrogate crop to account for low drift - groundspray application)  
 Application rate(s): 3x720, 2x1440 g a.s./ha  
 Interval (d): 28  
 Crop interception (%) : no interception  
 Application window: Northern and Southern Europe, Mar-May, Jun-Sept, Oct-Feb

Crop and growth stage: Grass/Alfalfa  
 Application rate(s): 1x1800 g a.s./ha  
 Interval (d): -  
 Crop interception (%) : Step 2: no interception  
 Application window: Northern and Southern Europe, Mar-May, Jun-Sept, Oct-Feb

**FOCUS Step 1 and 2 PEC<sub>sw</sub> and PEC<sub>sed</sub> for AMPA following application to field crops, orchards and vines (1 × 720 g a.s./ha)<sup>1</sup>**

| Scenario FOCUS  | Period/ Waterbody | Max PEC <sub>sw</sub> (µg/L) | Dominant entry route | Max PEC <sub>sed</sub> (µg/kg) |
|-----------------|-------------------|------------------------------|----------------------|--------------------------------|
| Step 1          |                   |                              |                      |                                |
| -               | -                 | 33.498                       | -                    | 821.787                        |
| Step 2          |                   |                              |                      |                                |
| Northern Europe | Mar-May           | 6.772                        | -                    | 169.014                        |

|                 |         |        |   |         |
|-----------------|---------|--------|---|---------|
| Northern Europe | Jun-Sep | 6.772  | - | 169.014 |
| Northern Europe | Oct-Feb | 16.402 | - | 413.697 |
| Southern Europe | Mar-May | 13.192 | - | 332.136 |
| Southern Europe | Jun-Sep | 9.982  | - | 250.575 |
| Southern Europe | Oct-Feb | 13.192 | - | 332.136 |

<sup>1</sup> Since application is to weeds *via* ground spray, runoff/drainage and drift loadings of active substance and metabolites are equivalent for all crops selected for modelling

**FOCUS Step 1 and 2 PEC<sub>sw</sub> and PEC<sub>sed</sub> for AMPA following application to field crops, orchards and vines (3 × 720 g a.s./ha, with application interval of 28 days)<sup>1</sup>**

| Scenario FOCUS  | Period/ Waterbody | Max PEC <sub>sw</sub> (µg/L) | Dominant entry route | Max PEC <sub>sed</sub> (µg/kg) |
|-----------------|-------------------|------------------------------|----------------------|--------------------------------|
| Step 1          |                   |                              |                      |                                |
| -               | -                 | 100.494                      | -                    | 2470.000                       |
| Step 2          |                   |                              |                      |                                |
| Northern Europe | Mar-May           | 19.017                       | -                    | 477.806                        |
| Northern Europe | Jun-Sep           | 19.017                       | -                    | 477.806                        |
| Northern Europe | Oct-Feb           | 46.595                       | -                    | 1180.000                       |
| Southern Europe | Mar-May           | 37.402                       | -                    | 944.972                        |
| Southern Europe | Jun-Sep           | 28.209                       | -                    | 711.389                        |
| Southern Europe | Oct-Feb           | 37.402                       | -                    | 944.972                        |

<sup>1</sup> Since application is to weeds *via* ground spray, runoff/drainage and drift loadings of active substance and metabolites are equivalent for all crops selected for modelling

**FOCUS Step 1 and 2 PEC<sub>sw</sub> and PEC<sub>sed</sub> for AMPA following application to field crops, orchards and vines (1 × 1440 g a.s./ha)<sup>1</sup>**

| Scenario FOCUS  | Period/ Waterbody | Max PEC <sub>sw</sub> (µg/L) | Dominant entry route | Max PEC <sub>sed</sub> (µg/kg) |
|-----------------|-------------------|------------------------------|----------------------|--------------------------------|
| Step 1          |                   |                              |                      |                                |
| -               | -                 | 66.996                       | -                    | 1640.000                       |
| Step 2          |                   |                              |                      |                                |
| Northern Europe | Mar-May           | 13.545                       | -                    | 338.028                        |
| Northern Europe | Jun-Sep           | 13.545                       | -                    | 338.028                        |
| Northern Europe | Oct-Feb           | 32.804                       | -                    | 827.394                        |
| Southern Europe | Mar-May           | 26.384                       | -                    | 664.272                        |
| Southern Europe | Jun-Sep           | 19.964                       | -                    | 501.150                        |
| Southern Europe | Oct-Feb           | 26.384                       | -                    | 664.272                        |

<sup>1</sup> Since application is to weeds *via* ground spray, runoff/drainage and drift loadings of active substance and metabolites are equivalent for all crops selected for modelling

**FOCUS Step 1 and 2 PEC<sub>sw</sub> and PEC<sub>sed</sub> for AMPA following application to orchards and vines (2 × 1440 g a.s./ha, with application interval of 28 days)<sup>1</sup>**

| Scenario FOCUS  | Period/ Waterbody | Max PEC <sub>sw</sub> (µg/L) | Dominant entry route | Max PEC <sub>sed</sub> (µg/kg) |
|-----------------|-------------------|------------------------------|----------------------|--------------------------------|
| Step 1          |                   |                              |                      |                                |
| -               | -                 | 133.991                      | -                    | 3290.000                       |
| Step 2          |                   |                              |                      |                                |
| Northern Europe | Mar-May           | 26.200                       | -                    | 656.086                        |
| Northern Europe | Jun-Sep           | 26.200                       | -                    | 656.086                        |
| Northern Europe | Oct-Feb           | 63.817                       | -                    | 1610.000                       |
| Southern Europe | Mar-May           | 51.278                       | -                    | 1290.000                       |
| Southern Europe | Jun-Sep           | 38.739                       | -                    | 974.709                        |
| Southern Europe | Oct-Feb           | 51.278                       | -                    | 1290.000                       |

<sup>1</sup> Since application is to weeds *via* ground spray, runoff/drainage and drift loadings of active substance and metabolites are equivalent for all crops selected for modelling



**FOCUS Step 1 and 2 PEC<sub>sw</sub> and PEC<sub>sed</sub> for AMPA following application to field crops (1 × 540 g a.s./ha)<sup>1</sup>**

| Scenario FOCUS  | Period/ Waterbody | Max PEC <sub>sw</sub> (µg/L) | Dominant entry route | Max PEC <sub>sed</sub> (µg/kg) |
|-----------------|-------------------|------------------------------|----------------------|--------------------------------|
| Step 1          |                   |                              |                      |                                |
| -               | -                 | 25.123                       | -                    | 616.340                        |
| Step 2          |                   |                              |                      |                                |
| Northern Europe | Mar-May           | 5.079                        | -                    | 126.760                        |
| Northern Europe | Jun-Sep           | 5.079                        | -                    | 126.760                        |
| Northern Europe | Oct-Feb           | 12.301                       | -                    | 310.273                        |
| Southern Europe | Mar-May           | 9.894                        | -                    | 249.102                        |
| Southern Europe | Jun-Sep           | 7.487                        | -                    | 187.931                        |
| Southern Europe | Oct-Feb           | 9.894                        | -                    | 249.102                        |

<sup>1</sup> Since application is to weeds *via* ground spray, runoff/drainage and drift loadings of active substance and metabolites are equivalent for all crops selected for modelling

**FOCUS Step 1 and 2 PEC<sub>sw</sub> and PEC<sub>sed</sub> for AMPA following application to field crops (1 × 1080 g a.s./ha)<sup>1</sup>**

| Scenario FOCUS  | Period/ Waterbody | Max PEC <sub>sw</sub> (µg/L) | Dominant entry route | Max PEC <sub>sed</sub> (µg/kg) |
|-----------------|-------------------|------------------------------|----------------------|--------------------------------|
| Step 1          |                   |                              |                      |                                |
| -               | -                 | 50.247                       | -                    | 1230.000                       |
| Step 2          |                   |                              |                      |                                |
| Northern Europe | Mar-May           | 10.159                       | -                    | 253.521                        |
| Northern Europe | Jun-Sep           | 10.159                       | -                    | 253.521                        |
| Northern Europe | Oct-Feb           | 24.603                       | -                    | 620.546                        |
| Southern Europe | Mar-May           | 19.788                       | -                    | 498.204                        |
| Southern Europe | Jun-Sep           | 14.973                       | -                    | 375.862                        |
| Southern Europe | Oct-Feb           | 19.788                       | -                    | 498.204                        |

<sup>1</sup> Since application is to weeds *via* ground spray, runoff/drainage and drift loadings of active substance and metabolites are equivalent for all crops selected for modelling

**FOCUS Step 1 and 2 PEC<sub>sw</sub> and PEC<sub>sed</sub> for AMPA following application to field crops (2 × 1080 g a.s./ha, with application interval of 28 days)<sup>1</sup>**

| Scenario FOCUS  | Period/ Waterbody | Max PEC <sub>sw</sub> (µg/L) | Dominant entry route | Max PEC <sub>sed</sub> (µg/kg) |
|-----------------|-------------------|------------------------------|----------------------|--------------------------------|
| Step 1          |                   |                              |                      |                                |
| -               | -                 | 100.494                      | -                    | 2470.000                       |
| Step 2          |                   |                              |                      |                                |
| Northern Europe | Mar-May           | 19.650                       | -                    | 492.064                        |
| Northern Europe | Jun-Sep           | 19.650                       | -                    | 492.064                        |
| Northern Europe | Oct-Feb           | 47.863                       | -                    | 1210.000                       |
| Southern Europe | Mar-May           | 38.459                       | -                    | 969.999                        |
| Southern Europe | Jun-Sep           | 29.054                       | -                    | 731.032                        |
| Southern Europe | Oct-Feb           | 38.459                       | -                    | 969.999                        |

<sup>1</sup> Since application is to weeds *via* ground spray, runoff/drainage and drift loadings of active substance and metabolites are equivalent for all crops selected for modelling

**FOCUS Step 1 and 2 PEC<sub>sw</sub> and PEC<sub>sed</sub> for AMPA following application to grass/alfalfa (1 × 1800 g a.s./ha)**

| Scenario FOCUS  | Period/ Waterbody | Max PEC <sub>sw</sub> (µg/L) | Dominant entry route | Max PEC <sub>sed</sub> (µg/kg) |
|-----------------|-------------------|------------------------------|----------------------|--------------------------------|
| Step 1          |                   |                              |                      |                                |
| -               | -                 | 83.745                       | -                    | 2050.000                       |
| Step 2          |                   |                              |                      |                                |
| Northern Europe | Mar-May           | 16.931                       | -                    | 422.535                        |
| Northern Europe | Jun-Sep           | 16.931                       | -                    | 422.535                        |
| Northern Europe | Oct-Feb           | 41.005                       | -                    | 1030.000                       |
| Southern Europe | Mar-May           | 32.980                       | -                    | 830.340                        |
| Southern Europe | Jun-Sep           | 24.956                       | -                    | 626.437                        |
| Southern Europe | Oct-Feb           | 32.980                       | -                    | 830.340                        |

Metabolite HMPA

Parameters used in FOCUSsw step 1 and 2

Molecular weight (g/mol): 112.02  
 Water metabolite  
 Koc(mL/g): 10 (default value) for PEC<sub>sw</sub> calculations  
 10 000 (default value) for PEC<sub>sed</sub> calculations  
 DT50 soil (d): 1000 (FOCUS default)  
 DT50 water/sediment/ system (d): 1000 (FOCUS default)  
 Maximum occurrence observed (% molar basis with respect to the parent)  
 Total Water and Sediment: 10  
 Soil: 0

Application rate

Crop and growth stage: Root vegetable, Potatoes, Bulb vegetable, Fruiting vegetable, Leafy vegetable, Sugar beet  
 Application rate(s): 1x540, 3x720, 2x1080, 1x1440 g a.s./ha  
 Interval (d): 28  
 Crop interception (%) : no interception  
 Application window: Northern and Southern Europe, Mar-May, Jun-Sept, Oct-Feb

Crop and growth stage: Pome/stone fruits, Olives, Vines (Grass/Alfalfa was used as surrogate crop to account for low drift - groundspray application)  
 Application rate(s): 3x720, 2x1440 g a.s./ha  
 Interval (d): 28  
 Crop interception (%) : no interception  
 Application window: Northern and Southern Europe, Mar-May, Jun-Sept, Oct-Feb

Crop and growth stage: Grass/Alfalfa  
 Application rate(s): 1x1800 g a.s./ha  
 Interval (d): -  
 Crop interception (%) : Step 2: no interception  
 Application window: Northern and Southern Europe, Mar-May, Jun-Sept, Oct-Feb

**FOCUS Step 1 and 2 PEC<sub>sw</sub> and PEC<sub>sed</sub> for HMPA following application to field crops, orchards and vines (1 × 720 g a.s./ha)<sup>1</sup>**

| Scenario FOCUS  | Period/ Waterbody | Max PEC <sub>sw</sub> (µg/L)<br>(based on Koc 10 L/kg) | Dominant entry route | Max PEC <sub>sed</sub> (µg/kg)<br>(based on Koc 10 000 L/kg) |
|-----------------|-------------------|--------------------------------------------------------|----------------------|--------------------------------------------------------------|
| Step 1          |                   |                                                        |                      |                                                              |
| -               | -                 | 16.128                                                 | -                    | 113.90                                                       |
| Step 2          |                   |                                                        |                      |                                                              |
| Northern Europe | Mar-May           | 3.518                                                  | -                    | 24.84                                                        |

|                 |         |       |   |       |
|-----------------|---------|-------|---|-------|
| Northern Europe | Jun-Sep | 3.518 | - | 24.84 |
| Northern Europe | Oct-Feb | 8.144 | - | 57.53 |
| Southern Europe | Mar-May | 6.602 | - | 46.63 |
| Southern Europe | Jun-Sep | 5.060 | - | 35.74 |
| Southern Europe | Oct-Feb | 6.602 | - | 46.63 |

<sup>1</sup> Since application is to weeds *via* ground spray, runoff/drainage and drift loadings of active substance and metabolites are equivalent for all crops selected for modelling

**FOCUS Step 1 and 2 PEC<sub>sw</sub> and PEC<sub>sed</sub> for HMPA following application to field crops, orchards and vines (3 × 720 g a.s./ha, with application interval of 28 days)<sup>1</sup>**

| Scenario FOCUS  | Period/ Waterbody | Max PEC <sub>sw</sub> (µg/L)<br>(based on Koc 10 L/kg) | Dominant entry route | Max PEC <sub>sed</sub> (µg/kg)<br>(based on Koc 10 000 L/kg) |
|-----------------|-------------------|--------------------------------------------------------|----------------------|--------------------------------------------------------------|
| Step 1          |                   |                                                        |                      |                                                              |
| -               | -                 | 48.385                                                 | -                    | 341.71                                                       |
| Step 2          |                   |                                                        |                      |                                                              |
| Northern Europe | Mar-May           | 9.178                                                  | -                    | 64.82                                                        |
| Northern Europe | Jun-Sep           | 9.178                                                  | -                    | 64.82                                                        |
| Northern Europe | Oct-Feb           | 21.541                                                 | -                    | 152.17                                                       |
| Southern Europe | Mar-May           | 17.420                                                 | -                    | 123.05                                                       |
| Southern Europe | Jun-Sep           | 13.299                                                 | -                    | 93.93                                                        |
| Southern Europe | Oct-Feb           | 17.420                                                 | -                    | 123.05                                                       |

<sup>1</sup> Since application is to weeds *via* ground spray, runoff/drainage and drift loadings of active substance and metabolites are equivalent for all crops selected for modelling

**FOCUS Step 1 and 2 PEC<sub>sw</sub> and PEC<sub>sed</sub> for HMPA following application to field crops, orchards and vines (1 × 1440 g a.s./ha)<sup>1</sup>**

| Scenario FOCUS  | Period/ Waterbody | Max PEC <sub>sw</sub> (µg/L)<br>(based on Koc 10 L/kg) | Dominant entry route | Max PEC <sub>sed</sub> (µg/kg)<br>(based on Koc 10 000 L/kg) |
|-----------------|-------------------|--------------------------------------------------------|----------------------|--------------------------------------------------------------|
| Step 1          |                   |                                                        |                      |                                                              |
| -               | -                 | 32.256                                                 | -                    | 227.81                                                       |
| Step 2          |                   |                                                        |                      |                                                              |
| Northern Europe | Mar-May           | 7.036                                                  | -                    | 49.68                                                        |
| Northern Europe | Jun-Sep           | 7.036                                                  | -                    | 49.68                                                        |
| Northern Europe | Oct-Feb           | 16.289                                                 | -                    | 115.05                                                       |
| Southern Europe | Mar-May           | 13.205                                                 | -                    | 93.26                                                        |
| Southern Europe | Jun-Sep           | 10.120                                                 | -                    | 71.47                                                        |
| Southern Europe | Oct-Feb           | 13.205                                                 | -                    | 93.26                                                        |

<sup>1</sup> Since application is to weeds *via* ground spray, runoff/drainage and drift loadings of active substance and metabolites are equivalent for all crops selected for modelling

**FOCUS Step 1 and 2 PEC<sub>sw</sub> and PEC<sub>sed</sub> for HMPA following application to orchards and vines (2 × 1440 g a.s./ha, with application interval of 28 days)<sup>1</sup>**

| Scenario FOCUS  | Period/ Waterbody | Max PEC <sub>sw</sub> (µg/L)<br>(based on Koc 10 L/kg) | Dominant entry route | Max PEC <sub>sed</sub> (µg/kg)<br>(based on Koc 10 000 L/kg) |
|-----------------|-------------------|--------------------------------------------------------|----------------------|--------------------------------------------------------------|
| Step 1          |                   |                                                        |                      |                                                              |
| -               | -                 | 64.513                                                 | -                    | 455.62                                                       |
| Step 2          |                   |                                                        |                      |                                                              |
| Northern Europe | Mar-May           | 13.155                                                 | -                    | 92.89                                                        |
| Northern Europe | Jun-Sep           | 13.155                                                 | -                    | 92.89                                                        |
| Northern Europe | Oct-Feb           | 30.610                                                 | -                    | 216.22                                                       |
| Southern Europe | Mar-May           | 24.791                                                 | -                    | 175.11                                                       |
| Southern Europe | Jun-Sep           | 18.973                                                 | -                    | 134.0                                                        |
| Southern Europe | Oct-Feb           | 24.791                                                 | -                    | 175.11                                                       |

<sup>1</sup> Since application is to weeds *via* ground spray, runoff/drainage and drift loadings of active substance and metabolites are equivalent for all crops selected for modelling

**FOCUS Step 1 and 2 PEC<sub>sw</sub> and PEC<sub>sed</sub> for HMPA following application to field crops (1 × 540 g a.s./ha)<sup>1</sup>**

| Scenario FOCUS  | Period/ Waterbody | Max PEC <sub>sw</sub> (µg/L) | Dominant entry route | Max PEC <sub>sed</sub> (µg/kg) |
|-----------------|-------------------|------------------------------|----------------------|--------------------------------|
| Step 1          |                   |                              |                      |                                |
| -               | -                 | 12.096                       | -                    | 85.43                          |
| Step 2          |                   |                              |                      |                                |
| Northern Europe | Mar-May           | 2.638                        | -                    | 18.63                          |
| Northern Europe | Jun-Sep           | 2.638                        | -                    | 18.63                          |
| Northern Europe | Oct-Feb           | 6.108                        | -                    | 43.15                          |
| Southern Europe | Mar-May           | 4.952                        | -                    | 34.97                          |
| Southern Europe | Jun-Sep           | 3.795                        | -                    | 26.80                          |
| Southern Europe | Oct-Feb           | 4.952                        | -                    | 34.97                          |

<sup>1</sup> Since application is to weeds *via* ground spray, runoff/drainage and drift loadings of active substance and metabolites are equivalent for all crops selected for modelling

**FOCUS Step 1 and 2 PEC<sub>sw</sub> and PEC<sub>sed</sub> for HMPA following application to field crops (1 × 1080 g a.s./ha)<sup>1</sup>**

| Scenario FOCUS  | Period/ Waterbody | Max PEC <sub>sw</sub> (µg/L)<br>(based on Koc 10 L/kg) | Dominant entry route | Max PEC <sub>sed</sub> (µg/kg)<br>(based on Koc 10 000 L/kg) |
|-----------------|-------------------|--------------------------------------------------------|----------------------|--------------------------------------------------------------|
| Step 1          |                   |                                                        |                      |                                                              |
| -               | -                 | 24.192                                                 | -                    | 170.86                                                       |
| Step 2          |                   |                                                        |                      |                                                              |
| Northern Europe | Mar-May           | 5.277                                                  | -                    | 37.26                                                        |
| Northern Europe | Jun-Sep           | 5.277                                                  | -                    | 37.26                                                        |
| Northern Europe | Oct-Feb           | 12.217                                                 | -                    | 86.29                                                        |
| Southern Europe | Mar-May           | 9.903                                                  | -                    | 69.95                                                        |
| Southern Europe | Jun-Sep           | 7.590                                                  | -                    | 53.60                                                        |
| Southern Europe | Oct-Feb           | 9.903                                                  | -                    | 69.95                                                        |

<sup>1</sup> Since application is to weeds *via* ground spray, runoff/drainage and drift loadings of active substance and metabolites are equivalent for all crops selected for modelling

**FOCUS Step 1 and 2 PEC<sub>sw</sub> and PEC<sub>sed</sub> for HMPA following application to field crops (2 × 1080 g a.s./ha, with application interval of 28 days)<sup>1</sup>**

| Scenario FOCUS  | Period/ Waterbody | Max PEC <sub>sw</sub> (µg/L)<br>(based on Koc 10 L/kg) | Dominant entry route | Max PEC <sub>sed</sub> (µg/kg)<br>(based on Koc 10 000 L/kg) |
|-----------------|-------------------|--------------------------------------------------------|----------------------|--------------------------------------------------------------|
| Step 1          |                   |                                                        |                      |                                                              |
| -               | -                 | 48.385                                                 | -                    | 341.71                                                       |
| Step 2          |                   |                                                        |                      |                                                              |
| Northern Europe | Mar-May           | 9.866                                                  | -                    | 69.67                                                        |
| Northern Europe | Jun-Sep           | 9.866                                                  | -                    | 69.67                                                        |
| Northern Europe | Oct-Feb           | 22.957                                                 | -                    | 162.16                                                       |
| Southern Europe | Mar-May           | 18.594                                                 | -                    | 131.33                                                       |
| Southern Europe | Jun-Sep           | 14.230                                                 | -                    | 100.50                                                       |
| Southern Europe | Oct-Feb           | 18.594                                                 | -                    | 131.33                                                       |

<sup>1</sup> Since application is to weeds *via* ground spray, runoff/drainage and drift loadings of active substance and metabolites are equivalent for all crops selected for modelling

**FOCUS Step 1 and 2 PEC<sub>sw</sub> and PEC<sub>sed</sub> for HMPA following application to grass/alfalfa, (1 × 1800 g a.s./ha)**

| Scenario FOCUS  | Period/ Waterbody | Max PEC <sub>sw</sub> (µg/L)<br>(based on Koc 10 L/kg) | Dominant entry route | Max PEC <sub>sed</sub> (µg/kg)<br>(based on Koc 10 000 L/kg) |
|-----------------|-------------------|--------------------------------------------------------|----------------------|--------------------------------------------------------------|
| Step 1          |                   |                                                        |                      |                                                              |
| -               | -                 | 40.321                                                 | -                    | 284.76                                                       |
| Step 2          |                   |                                                        |                      |                                                              |
| Northern Europe | Mar-May           | 8.795                                                  | -                    | 62.10                                                        |
| Northern Europe | Jun-Sep           | 8.795                                                  | -                    | 62.10                                                        |

|                 |         |        |   |        |
|-----------------|---------|--------|---|--------|
| Northern Europe | Oct-Feb | 20.361 | - | 143.82 |
| Southern Europe | Mar-May | 16.506 | - | 116.58 |
| Southern Europe | Jun-Sep | 12.650 | - | 89.34  |
| Southern Europe | Oct-Feb | 16.506 | - | 116.58 |

Metabolites P1a and M3.3

Parameters used in FOCUS<sub>sw</sub> step 1 and 2

Molecular weight (g/mol): 125 (*correct value for future calculations: 169.1*)  
 Sediment metabolites  
 Koc (mL/g): 10 000 (default value) for PEC<sub>sed</sub> calculations (PEC<sub>sw</sub> not required)  
 DT50 soil (d): 1000 (FOCUS default)  
 DT50 water/sediment/ system (d): 1000 (FOCUS default)  
 Maximum occurrence observed (% molar basis with respect to the parent)  
 Total Water and Sediment: 14.4 (worst-case between P1a and M3.3)  
 Soil: 0

Application rate

Crop and growth stage: Root vegetable, Potatoes, Bulb vegetable, Fruiting vegetable, Leafy vegetable, Sugar beet  
 Application rate(s): 1x540, 3x720, 2x1080, 1x1440 g a.s./ha  
 Interval (d): 28  
 Crop interception (%) : no interception  
 Application window: Northern and Southern Europe, Mar-May, Jun-Sept, Oct-Feb

Crop and growth stage: Pome/stone fruits, Olives, Vines (Grass/Alfalfa was used as surrogate crop to account for low drift - groundspray application)  
 Application rate(s): 3x720, 2x1440 g a.s./ha  
 Interval (d): 28  
 Crop interception (%) : no interception  
 Application window: Northern and Southern Europe, Mar-May, Jun-Sept, Oct-Feb

Crop and growth stage: Grass/Alfalfa  
 Application rate(s): 1x1800 g a.s./ha  
 Interval (d): -  
 Crop interception (%) : Step 2: no interception  
 Application window: Northern and Southern Europe, Mar-May, Jun-Sept, Oct-Feb

**FOCUS Step 1 and 2 PEC<sub>sw</sub> and PEC<sub>sed</sub> for P1a and M3.3 following application to field crops, orchards and vines (1 × 720 g a.s./ha)<sup>1</sup>**

| Scenario FOCUS  | Period/ Waterbody | Max PEC <sub>sw</sub> (µg/L)* | Dominant entry route | Max PEC <sub>sed</sub> (µg/kg) |
|-----------------|-------------------|-------------------------------|----------------------|--------------------------------|
| Step 1          |                   |                               |                      |                                |
| -               | -                 | -                             | -                    | 183.026                        |
| Step 2          |                   |                               |                      |                                |
| Northern Europe | Mar-May           | -                             | -                    | 39.915                         |
| Northern Europe | Jun-Sep           | -                             | -                    | 39.915                         |
| Northern Europe | Oct-Feb           | -                             | -                    | 92.436                         |
| Southern Europe | Mar-May           | -                             | -                    | 74.929                         |
| Southern Europe | Jun-Sep           | -                             | -                    | 57.422                         |
| Southern Europe | Oct-Feb           | -                             | -                    | 74.929                         |

<sup>1</sup> Since application is to weeds *via* ground spray, runoff/drainage and drift loadings of active substance and metabolites are equivalent for all crops selected for modelling

\* Only PEC<sub>sed</sub> are acceptable and required for P1a and M3.3.

**FOCUS Step 1 and 2 PEC<sub>sw</sub> and PEC<sub>sed</sub> for P1a and M3.3 following application to field crops, orchards and vines (3 × 720 g a.s./ha, with application interval of 28 days)<sup>1</sup>**

| Scenario FOCUS  | Period/ Waterbody | Max PEC <sub>sw</sub> (µg/L) * | Dominant entry route | Max PEC <sub>sed</sub> (µg/kg) |
|-----------------|-------------------|--------------------------------|----------------------|--------------------------------|
| Step 1          |                   |                                |                      |                                |
| -               | -                 | -                              | -                    | 549.077                        |
| Step 2          |                   |                                |                      |                                |
| Northern Europe | Mar-May           | -                              | -                    | 104.144                        |
| Northern Europe | Jun-Sep           | -                              | -                    | 104.144                        |
| Northern Europe | Oct-Feb           | -                              | -                    | 244.491                        |
| Southern Europe | Mar-May           | -                              | -                    | 197.709                        |
| Southern Europe | Jun-Sep           | -                              | -                    | 150.926                        |
| Southern Europe | Oct-Feb           | -                              | -                    | 197.709                        |

<sup>1</sup> Since application is to weeds *via* ground spray, runoff/drainage and drift loadings of active substance and metabolites are equivalent for all crops selected for modelling

\* Only PEC<sub>sed</sub> are acceptable and required for P1a and M3.3.

**FOCUS Step 1 and 2 PEC<sub>sw</sub> and PEC<sub>sed</sub> for P1a and M3.3 following application to field crops, orchards and vines (1 × 1440 g a.s./ha)<sup>1</sup>**

| Scenario FOCUS  | Period/ Waterbody | Max PEC <sub>sw</sub> (µg/L) * | Dominant entry route | Max PEC <sub>sed</sub> (µg/kg) |
|-----------------|-------------------|--------------------------------|----------------------|--------------------------------|
| Step 1          |                   |                                |                      |                                |
| -               | -                 | -                              | -                    | 366.051                        |
| Step 2          |                   |                                |                      |                                |
| Northern Europe | Mar-May           | -                              | -                    | 79.829                         |
| Northern Europe | Jun-Sep           | -                              | -                    | 79.829                         |
| Northern Europe | Oct-Feb           | -                              | -                    | 184.872                        |
| Southern Europe | Mar-May           | -                              | -                    | 149.857                        |
| Southern Europe | Jun-Sep           | -                              | -                    | 114.843                        |
| Southern Europe | Oct-Feb           | -                              | -                    | 149.857                        |

<sup>1</sup> Since application is to weeds *via* ground spray, runoff/drainage and drift loadings of active substance and metabolites are equivalent for all crops selected for modelling

\* Only PEC<sub>sed</sub> are acceptable and required for P1a and M3.3.

**FOCUS Step 1 and 2 PEC<sub>sw</sub> and PEC<sub>sed</sub> for P1a and M3.3 following application to orchards and vines (2 × 1440 g a.s./ha, with application interval of 28 days)<sup>1</sup>**

| Scenario FOCUS  | Period/ Waterbody | Max PEC <sub>sw</sub> (µg/L) * | Dominant entry route | Max PEC <sub>sed</sub> (µg/kg) |
|-----------------|-------------------|--------------------------------|----------------------|--------------------------------|
| Step 1          |                   |                                |                      |                                |
| -               | -                 | -                              | -                    | 732.102                        |
| Step 2          |                   |                                |                      |                                |
| Northern Europe | Mar-May           | -                              | -                    | 149.259                        |

|                 |         |   |   |         |
|-----------------|---------|---|---|---------|
| Northern Europe | Jun-Sep | - | - | 149.259 |
| Northern Europe | Oct-Feb | - | - | 347.414 |
| Southern Europe | Mar-May | - | - | 281.362 |
| Southern Europe | Jun-Sep | - | - | 215.310 |
| Southern Europe | Oct-Feb | - | - | 281.362 |

<sup>1</sup> Since application is to weeds *via* ground spray, runoff/drainage and drift loadings of active substance and metabolites are equivalent for all crops selected for modelling

\* Only PEC<sub>sw</sub> are acceptable and required for P1a and M3.3.

#### FOCUS Step 1 and 2 PEC<sub>sw</sub> and PEC<sub>sed</sub> for P1a and M3.3 following application to field crops (1 × 540 g a.s./ha)<sup>1</sup>

| Scenario FOCUS  | Period/ Waterbody | Max PEC <sub>sw</sub> (µg/L) * | Dominant entry route | Max PEC <sub>sed</sub> (µg/kg) |
|-----------------|-------------------|--------------------------------|----------------------|--------------------------------|
| Step 1          |                   |                                |                      |                                |
| -               | -                 | -                              | -                    | 137.269                        |
| Step 2          |                   |                                |                      |                                |
| Northern Europe | Mar-May           | -                              | -                    | 29.936                         |
| Northern Europe | Jun-Sep           | -                              | -                    | 29.936                         |
| Northern Europe | Oct-Feb           | -                              | -                    | 69.327                         |
| Southern Europe | Mar-May           | -                              | -                    | 56.197                         |
| Southern Europe | Jun-Sep           | -                              | -                    | 43.066                         |
| Southern Europe | Oct-Feb           | -                              | -                    | 56.197                         |

<sup>1</sup> Since application is to weeds *via* ground spray, runoff/drainage and drift loadings of active substance and metabolites are equivalent for all crops selected for modelling

\* Only PEC<sub>sed</sub> are acceptable and required for P1a and M3.3.

#### FOCUS Step 1 and 2 PEC<sub>sw</sub> and PEC<sub>sed</sub> for P1a and M3.3 following application to field crops (1 × 1080 g a.s./ha)<sup>1</sup>

| Scenario FOCUS  | Period/ Waterbody | Max PEC <sub>sw</sub> (µg/L) * | Dominant entry route | Max PEC <sub>sed</sub> (µg/kg) |
|-----------------|-------------------|--------------------------------|----------------------|--------------------------------|
| Step 1          |                   |                                |                      |                                |
| -               | -                 | -                              | -                    | 274.538                        |
| Step 2          |                   |                                |                      |                                |
| Northern Europe | Mar-May           | -                              | -                    | 59.872                         |
| Northern Europe | Jun-Sep           | -                              | -                    | 59.872                         |
| Northern Europe | Oct-Feb           | -                              | -                    | 138.654                        |
| Southern Europe | Mar-May           | -                              | -                    | 112.393                        |
| Southern Europe | Jun-Sep           | -                              | -                    | 86.132                         |
| Southern Europe | Oct-Feb           | -                              | -                    | 112.393                        |

<sup>1</sup> Since application is to weeds *via* ground spray, runoff/drainage and drift loadings of active substance and metabolites are equivalent for all crops selected for modelling

\* Only PEC<sub>sed</sub> are acceptable and required for P1a and M3.3.

#### FOCUS Step 1 and 2 PEC<sub>sw</sub> and PEC<sub>sed</sub> for P1a and M3.3 following application to field crops (2 × 1080 g a.s./ha, with application interval of 28 days)<sup>1</sup>

| Scenario FOCUS  | Period/ Waterbody | Max PEC <sub>sw</sub> (µg/L) * | Dominant entry route | Max PEC <sub>sed</sub> (µg/kg) |
|-----------------|-------------------|--------------------------------|----------------------|--------------------------------|
| Step 1          |                   |                                |                      |                                |
| -               | -                 | -                              | -                    | 549.077                        |
| Step 2          |                   |                                |                      |                                |
| Northern Europe | Mar-May           | -                              | -                    | 111.944                        |
| Northern Europe | Jun-Sep           | -                              | -                    | 111.944                        |
| Northern Europe | Oct-Feb           | -                              | -                    | 260.561                        |
| Southern Europe | Mar-May           | -                              | -                    | 211.022                        |
| Southern Europe | Jun-Sep           | -                              | -                    | 161.483                        |
| Southern Europe | Oct-Feb           | -                              | -                    | 211.022                        |

<sup>1</sup> Since application is to weeds *via* ground spray, runoff/drainage and drift loadings of active substance and metabolites are equivalent for all crops selected for modelling

\* Only PEC<sub>sed</sub> are acceptable and required for P1a and M3.3.

**FOCUS Step 1 and 2 PEC<sub>sw</sub> and PEC<sub>sed</sub> for P1a and M3.3 following application to grass/alfalfa (1 × 1800 g a.s./ha)**

| Scenario FOCUS  | Period/ Waterbody | Max PEC <sub>sw</sub> (µg/L) * | Dominant entry route | Max PEC <sub>sed</sub> (µg/kg) |
|-----------------|-------------------|--------------------------------|----------------------|--------------------------------|
| Step 1          |                   |                                |                      |                                |
| -               | -                 | -                              | -                    | 457.564                        |
| Step 2          |                   |                                |                      |                                |
| Northern Europe | Mar-May           | -                              | -                    | 99.787                         |
| Northern Europe | Jun-Sep           | -                              | -                    | 99.787                         |
| Northern Europe | Oct-Feb           | -                              | -                    | 231.089                        |
| Southern Europe | Mar-May           | -                              | -                    | 187.322                        |
| Southern Europe | Jun-Sep           | -                              | -                    | 143.554                        |
| Southern Europe | Oct-Feb           | -                              | -                    | 187.322                        |

\* Only PEC<sub>sed</sub> are acceptable and required for P1a and M3.3.

HardSPEC calculations

Parent

Parameters used in HardSPEC

Version 1.4.3.2  
 Molecular weight (g/mol): 169.1  
 Water solubility (mg/L): 100 000  
 K<sub>OC</sub>/K<sub>OM</sub> (mL/g): 4348 / 2522 (geometric mean, n = 10)  
 DT<sub>50</sub> soil (d): 161.1 days (max normalized DT<sub>50</sub> laboratory - parent only fits - and field, n=12, to take into account pH-dependence)  
 DT<sub>50</sub> water/sediment (d): 143.3 (geometric mean, total system, n = 4)  
*Should a refinement be needed, recommended soil DT50 (from parent only fits) for glyphosate for Tier 2 PEC<sub>sw</sub> calculations are:*  
 Soil pH<sub>water</sub> ≤ 6.5: DT<sub>50</sub> 70.0 d (geomean, n=6)  
 Soil pH<sub>water</sub> > 6.5: DT<sub>50</sub> 6.2 d (geomean, n=6)

Application rate

Use: Railway  
 Number of applications: 1  
 Interval (d): -  
 Application rate(s): 3600 g a.s./ha  
 Crop interception (%): no interception

|                        | Acute (24 hrs) concentration      |                                       | Application day PEC <sub>sw</sub> from spray drift (µg L <sup>-1</sup> ) |
|------------------------|-----------------------------------|---------------------------------------|--------------------------------------------------------------------------|
|                        | Water phase (ug L <sup>-1</sup> ) | Sediment phase (ug kg <sup>-1</sup> ) |                                                                          |
| Railway ditch leaching | 9.458                             | 34.240                                | 9.458                                                                    |
| Railway ditch runoff   | 9.458                             | 34.781                                | 9.458                                                                    |



Metabolite AMPA

Parameters used in HardSPEC

Molecular weight (g/mol): 111.04  
 Soil and water metabolite  
 Koc (mL/g): 2541 (geometric mean, n = 8)  
 DT<sub>50</sub> soil (d): 1040 (max laboratory normalized DT<sub>50</sub>, n=10, to take into account pH-dependence)  
 DT<sub>50</sub> water/sediment/ system (d): 98.7 (geometric mean, total system, n = 7) (*correct value for future calculations: 93.1 d*)  
*Should a refinement be needed, recommended soil DT50 for AMPA for Tier 2 PECsw calculations are:*  
 Soil pH<sub>water</sub> ≤ 6.5: DT<sub>50</sub> 663 d (geomean, n=4)  
 Soil pH<sub>water</sub> > 6.5: DT<sub>50</sub> 43.0 d (geomean, n=5)

Application rate

Use: Railway  
 Number of applications: 1  
 Interval (d): -  
 Application rate: 3600 g a.s./ha (corrected for molar ratio of 111.04/169.1, metabolite applied as parent substance)

|                        | Acute (24 hrs) concentration      |                                       | Application day PECsw from spray drift (µg L <sup>-1</sup> ) |
|------------------------|-----------------------------------|---------------------------------------|--------------------------------------------------------------|
|                        | Water phase (ug L <sup>-1</sup> ) | Sediment phase (ug kg <sup>-1</sup> ) |                                                              |
| Railway ditch leaching | 6.210                             | 18.390                                | 6.210                                                        |
| Railway ditch runoff   | 6.210                             | 19.469                                | 6.210                                                        |

Metabolite HMPA

Parameters used in HardSPEC

Railway use  
 PECsw/PECsed estimated from HardSPEC  
 PECsw/PECsed of glyphosate, corrected for molar ratio (112.02/169.1) and maximum occurrence in water (10%)

|                        | Acute (24 hrs) concentration      |                                       | Application day PECsw from spray drift (µg L <sup>-1</sup> ) |
|------------------------|-----------------------------------|---------------------------------------|--------------------------------------------------------------|
|                        | Water phase (ug L <sup>-1</sup> ) | Sediment phase (ug kg <sup>-1</sup> ) |                                                              |
| Railway ditch leaching | 0.627                             | 2.268                                 | 0.627                                                        |
| Railway ditch runoff   | 0.627                             | 2.304                                 | 0.627                                                        |

Metabolites P1a and M3.3

Parameters used in HardSPEC

Railway use  
 PECsed estimated from HardSPEC PECsed of glyphosate, corrected for maximum occurrence in sediment (14.4%, worst-case between P1a and M3.3)  
 PECsw not required

|                        | Acute (24 hrs) concentration      |                                       | Application day PECsw from spray drift (µg L <sup>-1</sup> ) |
|------------------------|-----------------------------------|---------------------------------------|--------------------------------------------------------------|
|                        | Water phase (ug L <sup>-1</sup> ) | Sediment phase (ug kg <sup>-1</sup> ) |                                                              |
| Railway ditch leaching | -                                 | 4.931                                 | -                                                            |
| Railway ditch runoff   | -                                 | 5.008                                 | -                                                            |

**Estimation of concentrations from other routes of exposure (Regulation (EU) N° 284/2013, Annex Part A, point 9.4)**

Method of calculation

No data, not required

**PEC**

Maximum concentration

No data, not required

## Ecotoxicology

### Effects on birds and other terrestrial vertebrates (Regulation (EU) N° 283/2013, Annex Part A, point 8.1 and Regulation (EU) N° 284/2013, Annex Part A, point 10.1)

| Species                                 | Test substance       | Time scale | End point         | Toxicity                                                         |
|-----------------------------------------|----------------------|------------|-------------------|------------------------------------------------------------------|
| <b>Birds</b>                            |                      |            |                   |                                                                  |
| <i>Colinus virginianus</i>              | Glyphosate K- salt   | Acute oral | LD <sub>50</sub>  | > 2241 mg a.e. <sup>1</sup> /kg bw                               |
| <i>Colinus virginianus</i>              | Glyphosate acid      | Acute oral | LD <sub>50</sub>  | > 2000 mg a.e./kg bw                                             |
| <i>Colinus virginianus</i>              | Glyphosate technical | Acute oral | LD <sub>50</sub>  | > 2000 mg a.e./kg bw                                             |
| <i>Coturnix coturnix japonica</i>       | Glyphosate technical | Acute oral | LD <sub>50</sub>  | > 2000 mg a.e./kg bw                                             |
| <i>Coturnix coturnix japonica</i>       | Glyphosate technical | Acute oral | LD <sub>50</sub>  | > 2000 mg a.e./kg bw                                             |
| <i>Anas platyrhynchos</i>               | Glyphosate technical | Acute oral | LD <sub>50</sub>  | > 2000 mg a.e./kg bw                                             |
| <i>Anas platyrhynchos</i>               | Glyphosate technical | Acute oral | LD <sub>50</sub>  | > 2000 mg a.e./kg bw                                             |
| <i>Colinus virginianus</i> <sup>2</sup> | Glyphosate acid      | Acute oral | LD <sub>50</sub>  | <b>4334</b> mg a.e./kg bw                                        |
| -                                       | MON 52276            | Acute oral | LD <sub>50</sub>  | No data                                                          |
| <i>Colinus virginianus</i>              | AMPA                 | Acute oral | LD <sub>50</sub>  | > 2250 mg metabolite/kg bw                                       |
| <i>Colinus virginianus</i>              | Glyphosate acid      | Short term | LDD <sub>50</sub> | >1511 mg a.e./kg bw                                              |
| <i>Anas platyrhynchos</i>               | Glyphosate acid      | Short term | LDD <sub>50</sub> | >1715 mg a.e./kg bw                                              |
| <i>Colinus virginianus</i>              | Glyphosate acid      | Long term  | NOEC<br>NOEL      | 2250 mg a.e./kg feed<br>201 mg a.e./kg bw d <sup>-1</sup>        |
| <i>Anas platyrhynchos</i>               | Glyphosate acid      | Long term  | NOEC<br>NOEL      | 1000 mg a.e./kg feed<br><b>117</b> mg a.e./kg bw d <sup>-1</sup> |
| <b>Mammals</b>                          |                      |            |                   |                                                                  |
| Rat and mouse <sup>3</sup>              | Glyphosate acid      | Acute      | LD <sub>50</sub>  | >2000 mg a.e./kg bw                                              |
| All mammals <sup>4</sup>                | Glyphosate acid      | Acute      | LD <sub>50</sub>  | <b>3447</b> mg a.e./kg bw                                        |
| Rat                                     | MON 52276            | Acute      | LD <sub>50</sub>  | >5000 mg a.e./kg bw                                              |

|                                                                                                                                                                                                                                                                                                                                                                                                                                                                                                                                                                                                                                                                                                                                                                                                                                                       |                      |           |                  |                     |
|-------------------------------------------------------------------------------------------------------------------------------------------------------------------------------------------------------------------------------------------------------------------------------------------------------------------------------------------------------------------------------------------------------------------------------------------------------------------------------------------------------------------------------------------------------------------------------------------------------------------------------------------------------------------------------------------------------------------------------------------------------------------------------------------------------------------------------------------------------|----------------------|-----------|------------------|---------------------|
| Rat and mice                                                                                                                                                                                                                                                                                                                                                                                                                                                                                                                                                                                                                                                                                                                                                                                                                                          | AMPA                 | Acute     | LD <sub>50</sub> | >5000 mg/kg bw      |
| Rabbit                                                                                                                                                                                                                                                                                                                                                                                                                                                                                                                                                                                                                                                                                                                                                                                                                                                | Glyphosate technical | Long-term | NOAEL            | 150-mg a.e./kg bw/d |
| Rat                                                                                                                                                                                                                                                                                                                                                                                                                                                                                                                                                                                                                                                                                                                                                                                                                                                   | AMPA                 | Long-term | NOAEL            | 150 mg/kg bw/d      |
| <p>Endocrine disrupting properties (Annex Part A, points 8.1.5)<br/>                     For wild mammals, the same conclusion as drawn for humans applies (ED criteria not met).<br/>                     A number of studies with different taxa and species were available, including among others an amphibian metamorphosis assay (AMA) and a Fish Short-Term Reproduction Assay (FSTRA). Many <i>in vivo</i> mechanistic, EATS-mediated and ‘sensitive to but not diagnostic’ parameters were measured in the available studies.<br/>                     Overall, no convincing pattern of EATS-mediated adversity and/or endocrine activity was observed. Therefore, glyphosate does not meet the ED criteria as laid down in point 3.8.2 of Annex II to Regulation (EC) No 1107/2009, as amended by Commission Regulation (EU) 2018/605.</p> |                      |           |                  |                     |
| <p>Additional higher tier studies (Annex Part A, points 10.1.1.2):<br/>                     None available</p>                                                                                                                                                                                                                                                                                                                                                                                                                                                                                                                                                                                                                                                                                                                                        |                      |           |                  |                     |
| <p>Terrestrial vertebrate wildlife (birds, mammals, reptile and amphibians) (Annex Part A, points 8.1.4, 10.1.3):7</p> <p><u>Birds</u><br/>                     Avian studies from the open literature were considered less relevant but supplementary, but no robust endpoints could be derived from these studies, to be used in the risk assessment.</p> <p><u>Mammals</u><br/>                     Please refer to the section on mammalian toxicology.</p> <p><u>Reptiles</u><br/>                     No studies on reptiles were considered as ‘relevant and reliable’ or ‘relevant and reliable with restrictions’.</p> <p><u>Amphibians</u><br/>                     Please refer to the section on aquatic organisms</p>                                                                                                                    |                      |           |                  |                     |

1 “a.e.”: glyphosate acid equivalents

2 All acute oral bird studies resulted in endpoints > 2000 mg/kg bw. Therefore, an extrapolation factor of 2.167 as recommended in the Guidance Document on Risk Assessment for Birds and Mammals (EFSA Journal 2009; 7(12): 1438) was applied.

3 Lowest value of available data

4 Geometric mean of available data considering lethal and sub-lethal effects.

**Toxicity/exposure ratios for terrestrial vertebrates (Regulation (EU) N° 284/2013, Part A, Annex point 10.1)**

**Risk envelope strategy - birds**

| GAP number and summary of use                                                                        | Application rate considered (28-day interval unless otherwise stated) |              |               |              |               |              |               |                            |               |                               |
|------------------------------------------------------------------------------------------------------|-----------------------------------------------------------------------|--------------|---------------|--------------|---------------|--------------|---------------|----------------------------|---------------|-------------------------------|
|                                                                                                      | 1 × 540 g/ha                                                          | 1 × 720 g/ha | 1 × 1080 g/ha | 2 × 720 g/ha | 1 × 1440 g/ha | 3 × 720 g/ha | 1 × 1800 g/ha | 2 × 1080 g/ha <sup>1</sup> | 2 × 1440 g/ha | 2 × 1800 g/ha (90 days apart) |
| Uses 1a-c: Applied to weeds; pre-sowing, pre-planting, pre emergence of field crops.                 |                                                                       | X            | X             |              | X             |              |               |                            |               |                               |
| Uses 2 a-c: Applied to weeds; post-harvest, pre-sowing, pre-planting of field crops.                 |                                                                       | X            | X             | X            | X             | X            |               | X                          |               |                               |
| Use 3 a-b: Applied to cereal volunteers; post-harvest, pre-sowing, pre-planting of field crops.      | X                                                                     |              |               |              |               |              |               |                            |               |                               |
| Use 4 a-c: Applied to weeds (post emergence) below trees in orchards.                                |                                                                       | X            | X             | X            | X             | X            |               | X                          | X             |                               |
| Use 5 a-c: Applied to weeds (post emergence) below vines in vineyards                                |                                                                       | X            | X             | X            | X             | X            |               | X                          | X             |                               |
| Use 6 a-b: Applied to weeds (post emergence) in field crops BBCH < 20                                |                                                                       | X            | X             |              |               |              |               |                            |               |                               |
| Use 7 a-b: Applied to weeds (post emergence) around railway tracks                                   |                                                                       |              |               |              |               |              | X             |                            |               | X                             |
| Use 8 and 9: Applied to invasive species (post emergence) in agricultural and non-agricultural areas |                                                                       |              |               |              |               |              | X             |                            |               |                               |
| Uses 10 a-c: Applied to couch grass; post-harvest, pre-sowing, pre-planting of field crops           |                                                                       | X            | X             |              |               |              |               |                            |               |                               |

X = this use is covered by the application rate indicated.

<sup>1</sup> Due to the long spray interval of 28 days this use covers also the following possible application pattern: 2 × 1080 g a.e./ha plus 1 × 720 g a.e./ha (28 day interval between each application).

| <b>The use of glyphosate in field crops: Uses 1 a-c, 2 a-c, 3 a-b, 6 a-b, 10 a-c</b> |                                                     |            |                        |       |         |
|--------------------------------------------------------------------------------------|-----------------------------------------------------|------------|------------------------|-------|---------|
| <b>1 × 1440 g/ha</b>                                                                 |                                                     |            |                        |       |         |
| Crop scenario                                                                        | Screening Indicator or Tier 1 generic focal species | Time scale | DDD (mg/kg bw per day) | TER   | Trigger |
| Screening Step (Birds)                                                               |                                                     |            |                        |       |         |
| Grassland                                                                            | Large herbivorous birds                             | Acute      | 43.9                   | 98.7  | 10      |
| Bare soil                                                                            | Small granivorous birds                             | Acute      | 35.6                   | 122.0 | 10      |
| Bulb and onion like crops                                                            | Small omnivorous birds                              | Acute      | 229                    | 19.0  | 10      |
| Grassland                                                                            | Large herbivorous birds                             | Long-term  | 12.4                   | 9.4   | 5       |

| <b>The use of glyphosate in field crops: Uses 1 a-c, 2 a-c, 3 a-b, 6 a-b, 10 a-c</b>                |                                                     |            |                        |            |         |
|-----------------------------------------------------------------------------------------------------|-----------------------------------------------------|------------|------------------------|------------|---------|
| <b>1 × 1440 g/ha</b>                                                                                |                                                     |            |                        |            |         |
| Crop scenario                                                                                       | Screening Indicator or Tier 1 generic focal species | Time scale | DDD (mg/kg bw per day) | TER        | Trigger |
| Bare soil                                                                                           | Small granivorous birds                             | Long-term  | 8.70                   | 13.4       | 5       |
| Bulb and onion like crops                                                                           | Small omnivorous birds                              | Long-term  | 49.5                   | <b>2.3</b> | 5       |
| Tier 1 (Birds)<br>(surrogate crop scenario)                                                         |                                                     |            |                        |            |         |
| Leafy vegetables<br>BBCH 10-49                                                                      | Small granivorous bird                              | Long-term  | 9.62                   | 12.2       | 5       |
| Leafy vegetables<br>BBCH ≥ 50                                                                       | Small granivorous bird                              | Long-term  | 2.90                   | 40.3       | 5       |
| Leafy vegetables<br>BBCH 10-49                                                                      | Small omnivorous bird                               | Long-term  | 8.32                   | 14.1       | 5       |
| Leafy vegetables<br>BBCH ≥ 50                                                                       | Small omnivorous bird                               | Long-term  | 2.52                   | 46.4       | 5       |
| Leafy vegetables<br>Leaf development<br>BBCH 10-19                                                  | Medium herbivorous/<br>granivorous bird             | Long-term  | 17.3                   | 6.8        | 5       |
| Leafy vegetables<br>BBCH 10-19                                                                      | Small insectivorous bird                            | Long-term  | 8.62                   | 13.6       | 5       |
| Leafy vegetables<br>BBCH ≥ 20                                                                       | Small insectivorous bird                            | Long-term  | 7.40                   | 15.8       | 5       |
| Maize<br>BBCH ≥ 40                                                                                  | Medium granivorous<br>bird                          | Long-term  | 0.612                  | 191        | 5       |
| Maize<br>BBCH 10-29<br>(to cover birds that visit the fields and consume treated grasses and weeds) | Medium herbivorous/granivorous<br>bird              | Long-term  | 17.3                   | 6.8        | 5       |

| <b>The use of glyphosate in field crops: Uses 1 a-c, 2 a-c, 3 a-b, 6 a-b, 10 a-c</b> |                                                     |            |                        |      |         |
|--------------------------------------------------------------------------------------|-----------------------------------------------------|------------|------------------------|------|---------|
| <b>1 × 1440 g/ha</b>                                                                 |                                                     |            |                        |      |         |
| Crop scenario                                                                        | Screening Indicator or Tier 1 generic focal species | Time scale | DDD (mg/kg bw per day) | TER  | Trigger |
| Maize<br>BBCH ≥ 40                                                                   | Medium herbivorous/<br>granivorous bird             | Long-term  | 4.35                   | 26.9 | 5       |
| Oilseed rape<br>Late (with<br>seeds)<br>BBCH 30-99                                   | Small insectivorous bird                            | Long-term  | 2.06                   | 56.8 | 5       |
| Oilseed rape<br>Late (with<br>seeds)<br>BBCH 80-99                                   | Small granivorous bird                              | Long-term  | 8.70                   | 13.4 | 5       |
| Bulbs and<br>onion like<br>crops<br>BBCH ≥ 20                                        | Small insectivorous bird                            | Long-term  | 7.40                   | 15.8 | 5       |
| Bulbs &<br>onion like<br>crops<br>BBCH ≥ 40                                          | Small omnivorous bird                               | Long-term  | 4.96                   | 23.6 | 5       |
| Cereals<br>Late season-<br>Seed heads                                                | Small granivorous/<br>insectivorous bird            | Long-term  | 3.59                   | 32.6 | 5       |
| Sunflower<br>Late<br>(Flowering,<br>seed<br>ripening)<br>BBCH 61-92                  | Small granivorous/<br>insectivorous bird            | Long-term  | 7.63                   | 15.4 | 5       |
| Bulbs and<br>onion like<br>crops<br>BBCH 10-19                                       | Small insectivorous bird                            | Long-term  | 6.47                   | 18.1 | 5       |
| Bulbs &<br>onion like<br>crops<br>BBCH 10-39                                         | Small omnivorous bird                               | Long-term  | 6.24                   | 18.8 | 5       |
| Leafy<br>vegetables<br>BBCH 10-49                                                    | Small granivorous bird                              | Long-term  | 7.21                   | 16.2 | 5       |
| Leafy<br>vegetables<br>Leaf<br>development<br>BBCH 10-19                             | Medium herbivorous/<br>granivorous bird             | Long-term  | 13.0                   | 9.0  | 5       |

| <b>The use of glyphosate in orchards (ground application): Uses 4 a-c</b> |                                                     |            |                        |      |         |
|---------------------------------------------------------------------------|-----------------------------------------------------|------------|------------------------|------|---------|
| <b>2 × 1440 g/ha (28-day interval between applications)</b>               |                                                     |            |                        |      |         |
| Crop scenario                                                             | Screening Indicator or Tier 1 generic focal species | Time scale | DDD (mg/kg bw per day) | TER  | Trigger |
| Screening Step (Birds)                                                    |                                                     |            |                        |      |         |
| Orchard                                                                   | Small insectivorous birds                           | Acute      | 74.1                   | 58.5 | 10      |
| Orchard                                                                   | Small insectivorous birds                           | Long-term  | 15.3                   | 7.6  | 5       |
| Tier 1 (Birds)                                                            |                                                     |            |                        |      |         |
| Not required                                                              | -                                                   | -          | -                      | -    | -       |

| <b>The use of glyphosate in vineyards (ground application): Uses 5 a-c</b>                   |                                                     |            |                        |             |         |
|----------------------------------------------------------------------------------------------|-----------------------------------------------------|------------|------------------------|-------------|---------|
| <b>2 × 1440 g/ha (28-day interval between applications)</b>                                  |                                                     |            |                        |             |         |
| Crop scenario                                                                                | Screening Indicator or Tier 1 generic focal species | Time scale | DDD (mg/kg bw per day) | TER         | Trigger |
| Screening Step (Birds)                                                                       |                                                     |            |                        |             |         |
| Vineyard                                                                                     | Small omnivorous birds                              | Acute      | 151.0                  | 28.7        | 10      |
| Vineyard                                                                                     | Small omnivorous birds                              | Long-term  | 32.7                   | <b>3.57</b> | 5       |
| Tier 1 (Birds)                                                                               |                                                     |            |                        |             |         |
| (surrogate scenario considering ground directed applications are not covered in EFSA (2009)) |                                                     |            |                        |             |         |
| Vineyard BBCH 10-19                                                                          | Small insectivorous bird                            | Long-term  | 9.65                   | 12.1        | 5       |
| Vineyard BBCH 20-39                                                                          | Small insectivorous bird                            | Long-term  | 8.31                   | 14.1        | 5       |
| Vineyard BBCH 10-19                                                                          | Small granivorous bird                              | Long-term  | 5.79                   | 20.2        | 5       |
| Vineyard BBCH 20-39                                                                          | Small granivorous bird                              | Long-term  | 4.79                   | 24.4        | 5       |
| Vineyard BBCH ≥ 40                                                                           | Small granivorous bird                              | Long-term  | 2.85                   | 41.1        | 5       |
| Vineyard BBCH 10-19                                                                          | Small omnivorous bird                               | Long-term  | 5.46                   | 21.4        | 5       |



| <b>The use of glyphosate in vineyards (ground application): Uses 5 a-c</b><br><b>2 × 1440 g/ha (28-day interval between applications)</b> |                                                     |            |                        |      |         |
|-------------------------------------------------------------------------------------------------------------------------------------------|-----------------------------------------------------|------------|------------------------|------|---------|
| Crop scenario                                                                                                                             | Screening Indicator or Tier 1 generic focal species | Time scale | DDD (mg/kg bw per day) | TER  | Trigger |
| Vineyard BBCH 20-39                                                                                                                       | Small omnivorous bird                               | Long-term  | 4.53                   | 25.8 | 5       |
| Vineyard BBCH ≥ 40                                                                                                                        | Small omnivorous bird                               | Long-term  | 2.77                   | 42.2 | 5       |

| <b>The use of glyphosate on railway tracks: Uses 7a-b</b><br><b>2 × 1800 g/ha (90-day interval between applications)</b> |                                                     |            |                                                                          |            |         |
|--------------------------------------------------------------------------------------------------------------------------|-----------------------------------------------------|------------|--------------------------------------------------------------------------|------------|---------|
| Crop scenario                                                                                                            | Screening Indicator or Tier 1 generic focal species | Time scale | DDD (mg/kg bw per day)                                                   | TER        | Trigger |
| <b>Screening Step (Birds)</b>                                                                                            |                                                     |            |                                                                          |            |         |
| Grassland                                                                                                                | Large herbivorous birds                             | Acute      | 54.9                                                                     | 78.9       | 10      |
| Bare soil                                                                                                                | Small granivorous birds                             | Acute      | 44.5                                                                     | 97.5       | 10      |
| Bulb and onion like crops                                                                                                | Small omnivorous bird                               | Acute      | 286                                                                      | 15.2       | 10      |
| Grassland                                                                                                                | Large herbivorous birds                             | Long-term  | 15.5                                                                     | 7.5        | 5       |
| Bare soil                                                                                                                | Small granivorous birds                             | Long-term  | 10.9                                                                     | 10.7       | 5       |
| Bulb and onion like crops                                                                                                | Small omnivorous bird                               | Long-term  | 61.8                                                                     | <b>1.9</b> | 5       |
| <b>Tier 1 (Birds)</b>                                                                                                    |                                                     |            |                                                                          |            |         |
| -                                                                                                                        | Small omnivorous bird                               | Long-term  | Covered by the corresponding Tier 1 scenario for invasive species below. | -          | -       |

| <b>The use of glyphosate in agricultural and non-agricultural areas to control invasive species: Uses 8, 9</b><br><b>1 × 1800 g/ha</b> |                                                     |            |                        |      |         |
|----------------------------------------------------------------------------------------------------------------------------------------|-----------------------------------------------------|------------|------------------------|------|---------|
| Crop scenario                                                                                                                          | Screening Indicator or Tier 1 generic focal species | Time scale | DDD (mg/kg bw per day) | TER  | Trigger |
| <b>Screening Step (Birds)</b>                                                                                                          |                                                     |            |                        |      |         |
| Grassland                                                                                                                              | Large herbivorous birds                             | Acute      | 54.9                   | 78.9 | 10      |

| <b>The use of glyphosate in agricultural and non-agricultural areas to control invasive species:<br/>Uses 8, 9<br/>1 × 1800 g/ha</b> |                                                     |            |                        |            |         |
|--------------------------------------------------------------------------------------------------------------------------------------|-----------------------------------------------------|------------|------------------------|------------|---------|
| Crop scenario                                                                                                                        | Screening Indicator or Tier 1 generic focal species | Time scale | DDD (mg/kg bw per day) | TER        | Trigger |
| Bare soil                                                                                                                            | Small granivorous birds                             | Acute      | 44.5                   | 97.5       | 10      |
| Bulb and onion like crops                                                                                                            | Small omnivorous birds                              | Acute      | 286                    | 15.2       | 10      |
| Grassland                                                                                                                            | Large herbivorous birds                             | Long-term  | 15.5                   | 7.5        | 5       |
| Bare soil                                                                                                                            | Small granivorous birds                             | Long-term  | 10.9                   | 10.7       | 5       |
| Bulb and onion like crops                                                                                                            | Small omnivorous birds                              | Long-term  | 61.8                   | <b>1.9</b> | 5       |
| <b>Tier 1 (Birds)<br/>(surrogate crop-scenario)</b>                                                                                  |                                                     |            |                        |            |         |
| Cereals Early (shoots) autumn-winter BBCH 10 - 29                                                                                    | Large herbivorous bird                              | Long-term  | 15.5                   | 7.5        | 5       |
| Maize BBCH 10-29                                                                                                                     | Medium granivorous bird                             | Long-term  | 2.86                   | 40.9       | 5       |
| Leafy vegetables BBCH 10-19                                                                                                          | Medium herbivorous/granivorous bird                 | Long-term  | 21.7                   | 5.4        | 5       |
| Leafy vegetables BBCH 10-49                                                                                                          | Small granivorous bird                              | Long-term  | 12.0                   | 9.8        | 5       |
| Oilseed rape Late (with seeds) BBCH 30-99                                                                                            | Small insectivorous bird                            | Long-term  | 2.58                   | 45.3       | 5       |
| Hops BBCH 10-19                                                                                                                      | Small insectivorous bird                            | Long-term  | 8.68                   | 13.5       | 5       |

| <b>The use of glyphosate in agricultural and non-agricultural areas to control invasive species:<br/>Uses 8, 9<br/>1 × 1800 g/ha</b> |                                                     |            |                        |      |         |
|--------------------------------------------------------------------------------------------------------------------------------------|-----------------------------------------------------|------------|------------------------|------|---------|
| Crop scenario                                                                                                                        | Screening Indicator or Tier 1 generic focal species | Time scale | DDD (mg/kg bw per day) | TER  | Trigger |
| Cereals<br>Late post-emergence<br>(May-June)<br>BBCH 71 - 89                                                                         | Small insectivorous bird                            | Long-term  | 21.4                   | 5.5  | 5       |
| Cereals<br>Early autumn-winter<br>BBCH 10-29                                                                                         | Large herbivorous bird                              | Long-term  | 15.5                   | 7.5  | 5       |
| Orchards<br>Spring<br>Summer                                                                                                         | Small insectivorous bird                            | Long-term  | 17.4                   | 6.7  | 5       |
| Bulbs and onion like crops<br>BBCH 10-19                                                                                             | Small insectivorous bird                            | Long-term  | 10.8                   | 10.8 | 5       |
| Bush and cane fruit.<br>Whole season<br>BBCH 00-79 Currants                                                                          | Small insectivorous bird                            | Long-term  | 19.4                   | 6.0  | 5       |
| Vineyard<br>BBCH 10-19                                                                                                               | Small insectivorous bird                            | Long-term  | 11.0                   | 10.6 | 5       |
| Maize<br>Leaf development<br>BBCH 10-19                                                                                              | Small insectivorous / worm feeding species          | Long-term  | 5.44                   | 21.5 | 5       |
| Bulbs and onion like crops<br>BBCH 10-39                                                                                             | Small omnivorous bird                               | Long-term  | 10.4                   | 11.3 | 5       |
| <b>Higher tier (Birds)</b>                                                                                                           |                                                     |            |                        |      |         |
| Not needed                                                                                                                           | -                                                   | -          | -                      | -    | -       |

**Risk envelope strategy - mammals**

| GAP number and summary of use                                                                        | Application rate considered (28 day interval unless otherwise stated) |              |               |              |               |              |               |                            |               |                               |
|------------------------------------------------------------------------------------------------------|-----------------------------------------------------------------------|--------------|---------------|--------------|---------------|--------------|---------------|----------------------------|---------------|-------------------------------|
|                                                                                                      | 1 × 540 g/ha                                                          | 1 × 720 g/ha | 1 × 1080 g/ha | 2 × 720 g/ha | 1 × 1440 g/ha | 3 × 720 g/ha | 1 × 1800 g/ha | 2 × 1080 g/ha <sup>A</sup> | 2 × 1440 g/ha | 2 × 1800 g/ha (90 days apart) |
| Uses 1a-c: Applied to weeds; pre-sowing, pre-planting, pre-emergence of field crops.                 |                                                                       | X            | X             |              | X             |              |               |                            |               |                               |
| Uses 2 a-c: Applied to weeds; post-harvest, pre-sowing, pre-planting of field crops.                 |                                                                       | X            | X             | X            | X             | X            |               | X                          |               |                               |
| Use 3 a-b: Applied to cereal volunteers; post-harvest, pre-sowing, pre-planting of field crops.      | X                                                                     |              |               |              |               |              |               |                            |               |                               |
| Use 4 a-c: Applied to weeds (post emergence) below trees in orchards.                                |                                                                       | X            | X             | X            | X             | X            |               | X                          | X             |                               |
| Use 5 a-c: Applied to weeds (post emergence) below vines in vineyards                                |                                                                       | X            | X             | X            | X             | X            |               | X                          | X             |                               |
| Use 6 a-b: Applied to weeds (post emergence) in field crops BBCH < 20                                |                                                                       | X            | X             |              |               |              |               |                            |               |                               |
| Use 7 a-b: Applied to weeds (post emergence) around railway tracks                                   |                                                                       |              |               |              |               |              | X             |                            |               | X                             |
| Use 8 and 9: Applied to invasive species (post emergence) in agricultural and non-agricultural areas |                                                                       |              |               |              |               |              | X             |                            |               |                               |
| Uses 10 a-c: Applied to couch grass; post-harvest, pre-sowing, pre-planting of field crops           |                                                                       | X            | X             |              |               |              |               |                            |               |                               |

X = this use is covered by the application rate indicated.

<sup>A</sup> Due to the long spray interval of 28 days this use covers also the following possible application pattern: 2 × 1080 g a.s./ha plus 1 × 720 g a.s./ha (28 day interval between each application).

| <b>The use of glyphosate in field crops: Uses 1 a-c, 2 a-c, 3 a-b, 10 a-c</b> |                                                     |            |                        |      |         |
|-------------------------------------------------------------------------------|-----------------------------------------------------|------------|------------------------|------|---------|
| <b>1 × 1440 g/ha</b>                                                          |                                                     |            |                        |      |         |
| Crop scenario                                                                 | Screening Indicator or Tier 1 generic focal species | Time scale | DDD (mg/kg bw per day) | TER  | Trigger |
| Screening Step (Mammals)                                                      |                                                     |            |                        |      |         |
| Bare soil                                                                     | Small granivorous mammal                            | Acute      | 20.7                   | 167  | 10      |
| Bulb and onion like crops                                                     | Small herbivorous mammal                            | Acute      | 170                    | 20.3 | 10      |

| <b>The use of glyphosate in field crops: Uses 1 a-c, 2 a-c, 3 a-b, 10 a-c<br/>1 × 1440 g/ha</b> |                                                     |            |                        |            |         |
|-------------------------------------------------------------------------------------------------|-----------------------------------------------------|------------|------------------------|------------|---------|
| Crop scenario                                                                                   | Screening Indicator or Tier 1 generic focal species | Time scale | DDD (mg/kg bw per day) | TER        | Trigger |
| Fruiting vegetables                                                                             | Small herbivorous mammal                            | Acute      | 196                    | 17.6       | 10      |
| Bare soil                                                                                       | Small granivorous mammal                            | Long-term  | 5.04                   | 29.8       | 5       |
| Bulb and onion like crops                                                                       | Small herbivorous mammal                            | Long-term  | 36.9                   | <b>4.1</b> | 5       |
| Fruiting vegetables                                                                             | Small herbivorous mammal                            | Long-term  | 55.2                   | <b>2.7</b> | 5       |
| Tier 1 (Mammals)<br>(surrogate crop-scenario)                                                   |                                                     |            |                        |            |         |
| Grassland All season                                                                            | Large herbivorous mammal                            | Long-term  | 13.2                   | 11.4       | 5       |
| Grassland Late                                                                                  | Small insectivorous mammal                          | Long-term  | 1.45                   | 103        | 5       |
| Grassland All season                                                                            | Small herbivorous mammal                            | Long-term  | 55.2                   | <b>2.7</b> | 5       |
| Grassland Late season (seed heads)                                                              | Small omnivorous mammal                             | Long-term  | 5.04                   | 29.8       | 5       |
| Leafy vegetables BBCH 10 - 19                                                                   | Small insectivorous mammal                          | Long-term  | 3.21                   | 46.7       | 5       |
| Leafy vegetables BBCH ≥ 20                                                                      | Small insectivorous mammal                          | Long-term  | 1.45                   | 103        | 5       |
| Leafy vegetables BBCH 40 - 49                                                                   | Small herbivorous mammal                            | Long-term  | 55.2                   | <b>2.7</b> | 5       |
| Leafy vegetables BBCH ≥ 50                                                                      | Small herbivorous mammal                            | Long-term  | 16.6                   | 9.0        | 5       |
| Leafy vegetables All season                                                                     | Large herbivorous mammal                            | Long-term  | 10.9                   | 13.8       | 5       |
| Leafy vegetables BBCH 10 - 49                                                                   | Small omnivorous mammal                             | Long-term  | 5.95                   | 25.2       | 5       |
| Leafy vegetables BBCH ≥ 50                                                                      | Small omnivorous mammal                             | Long-term  | 1.76                   | 85.2       | 5       |
| Bulbs and onion like crops BBCH ≥ 20                                                            | Small insectivorous mammal                          | Long-term  | 1.45                   | 103        | 5       |

| <b>The use of glyphosate in field crops: Uses 6 a-b</b> |                                                     |            |                        |            |         |
|---------------------------------------------------------|-----------------------------------------------------|------------|------------------------|------------|---------|
| <b>1 x 1080 g/ha</b>                                    |                                                     |            |                        |            |         |
| Crop scenario                                           | Screening Indicator or Tier 1 generic focal species | Time scale | DDD (mg/kg bw per day) | TER        | Trigger |
| Screening Step (Mammals)                                |                                                     |            |                        |            |         |
| Bare soil                                               | Small granivorous mammal                            | Acute      | 15.6                   | 221        | 10      |
| Bulb and onion like crops                               | Small herbivorous mammal                            | Acute      | 128                    | 26.9       | 10      |
| Fruiting vegetables                                     | Small herbivorous mammal                            | Acute      | 147                    | 23.4       | 10      |
| Bare soil                                               | Small granivorous mammal                            | Long-term  | 3.78                   | 39.7       | 5       |
| Bulb and onion like crops                               | Small herbivorous mammal                            | Long-term  | 17.7                   | 5.4        | 5       |
| Fruiting vegetables                                     | Small herbivorous mammal                            | Long-term  | 41.38                  | <b>3.6</b> | 5       |
| Tier 1 (Mammals)<br>(surrogate crop scenario)           |                                                     |            |                        |            |         |
| Bulbs & onion like crops<br>BBCH 10 – 19                | Small insectivorous mammal                          | Long-term  | 2.40                   | 62.5       | 5       |
| Bulbs & onion like crops<br>BBCH 10 – 39                | Small omnivorous mammal                             | Long-term  | 4.46                   | 33.6       | 5       |
| Fruiting vegetables<br>BBCH 10 – 49                     | Small herbivorous mammal                            | Long-term  | 41.4                   | <b>3.6</b> | 5       |
| Leafy vegetables<br>All season                          | Large herbivorous mammal                            | Long-term  | 8.19                   | 18.3       | 5       |

| <b>The use of glyphosate in field crops: Use 3 a-b</b> |                                                     |            |                        |      |         |
|--------------------------------------------------------|-----------------------------------------------------|------------|------------------------|------|---------|
| <b>1 × 540 g/ha</b>                                    |                                                     |            |                        |      |         |
| Crop scenario                                          | Screening Indicator or Tier 1 generic focal species | Time scale | DDD (mg/kg bw per day) | TER  | Trigger |
| Screening Step (Mammals)                               |                                                     |            |                        |      |         |
| Bare soil                                              | Small granivorous mammal                            | Acute      | 7.78                   | 443  | 10      |
| Bulb and onion like crops                              | Small herbivorous mammal                            | Acute      | 63.9                   | 53.9 | 10      |
| Fruiting vegetables                                    | Small herbivorous mammal                            | Acute      | 73.7                   | 46.8 | 10      |
| Bare soil                                              | Small granivorous mammal                            | Long-term  | 1.89                   | 79.4 | 5       |
| Bulb and onion like crops                              | Small herbivorous mammal                            | Long-term  | 13.8                   | 10.9 | 5       |
| Fruiting vegetables                                    | Small herbivorous mammal                            | Long-term  | 20.7                   | 7.2  | 5       |

| <b>The use of glyphosate in orchards and vines (ground application): Uses 4 a-c, 5 a-c</b> |                                                     |            |                        |            |         |
|--------------------------------------------------------------------------------------------|-----------------------------------------------------|------------|------------------------|------------|---------|
| <b>2 × 1440 g/ha (28-day interval between applications)</b>                                |                                                     |            |                        |            |         |
| Crop scenario                                                                              | Screening Indicator or Tier 1 generic focal species | Time scale | DDD (mg/kg bw per day) | TER        | Trigger |
| Screening Step (Mammals)                                                                   |                                                     |            |                        |            |         |
| Fruiting vegetables                                                                        | Small herbivorous mammal                            | Acute      | 216                    | 16         | 10      |
| Fruiting vegetables                                                                        | Small herbivorous mammal                            | Long-term  | 60.7                   | <b>2.5</b> | 5       |
| Tier 1 (Mammals)                                                                           |                                                     |            |                        |            |         |
| Orchards Application crop directed BBCH <10 or not crop directed                           | Small insectivorous mammal                          | Long-term  | 1.60                   | 93.8       | 10      |
| Orchards Application crop directed BBCH <10 or not crop directed                           | Small herbivorous mammal                            | Long-term  | 60.7                   | <b>2.5</b> | 10      |

| <b>The use of glyphosate in orchards and vines (ground application): Uses 4 a-c, 5 a-c<br/>2 × 1440 g/ha (28-day interval between applications)</b> |                                                     |            |                        |            |         |
|-----------------------------------------------------------------------------------------------------------------------------------------------------|-----------------------------------------------------|------------|------------------------|------------|---------|
| Crop scenario                                                                                                                                       | Screening Indicator or Tier 1 generic focal species | Time scale | DDD (mg/kg bw per day) | TER        | Trigger |
| Orchards Application crop directed BBCH <10 or not crop directed                                                                                    | Large herbivorous mammal                            | Long-term  | 12.0                   | 12.5       | 5       |
| Orchards Application crop directed BBCH <10 or not crop directed                                                                                    | Small omnivorous mammal                             | Long-term  | 6.55                   | 22.9       | 5       |
| Vineyard Application ground directed                                                                                                                | Large herbivorous mammal                            | Long-term  | 9.32                   | 16.1       | 5       |
| Vineyard BBCH 10-19                                                                                                                                 | Large herbivorous mammal                            | Long-term  | 5.62                   | 26.7       | 5       |
| Vineyard BBCH 20 – 39                                                                                                                               | Large herbivorous mammal                            | Long-term  | 4.62                   | 32.5       | 5       |
| Vineyard BBCH ≥ 40                                                                                                                                  | Large herbivorous mammal                            | Long-term  | 2.77                   | 54.2       | 5       |
| Vineyard BBCH 10 – 19                                                                                                                               | Small insectivorous mammal                          | Long-term  | 3.53                   | 42.5       | 5       |
| Vineyard BBCH ≥ 20                                                                                                                                  | Small insectivorous mammal                          | Long-term  | 1.60                   | 93.8       | 5       |
| Vineyard Application ground directed                                                                                                                | Small herbivorous mammal                            | Long-term  | 60.7                   | <b>2.5</b> | 5       |
| Vineyard Application ground directed                                                                                                                | Small omnivorous mammal                             | Long-term  | 6.55                   | 22.9       | 5       |



| <b>The use of glyphosate in orchards and vines (ground application): Uses 4 a-c, 5 a-c</b> |                                                     |            |                        |      |         |
|--------------------------------------------------------------------------------------------|-----------------------------------------------------|------------|------------------------|------|---------|
| <b>1 × 720 g/ha</b>                                                                        |                                                     |            |                        |      |         |
| Crop scenario                                                                              | Screening Indicator or Tier 1 generic focal species | Time scale | DDD (mg/kg bw per day) | TER  | Trigger |
| Screening Step (Mammals)                                                                   |                                                     |            |                        |      |         |
| Orchards / vineyards post-emergence of weeds                                               | Small herbivorous mammal                            | Acute      | 98.2                   | 35.1 | 5       |
| Orchards / vineyards post-emergence of weeds                                               | Small herbivorous mammal                            | Long term  | 27.6                   | 5.4  | 5       |

| <b>The use of glyphosate in railway tracks: Uses 7 a-b</b> |                                                     |            |                        |            |         |
|------------------------------------------------------------|-----------------------------------------------------|------------|------------------------|------------|---------|
| <b>1 × 1800 g/ha and 2 × 1800 g/ha, 90 days apart</b>      |                                                     |            |                        |            |         |
| Crop scenario                                              | Screening Indicator or Tier 1 generic focal species | Time scale | DDD (mg/kg bw per day) | TER        | Trigger |
| Screening Step (Mammals)                                   |                                                     |            |                        |            |         |
| Bare soil                                                  | Small granivorous mammal                            | Acute      | 28.5                   | 121        | 10      |
| Fruiting vegetables                                        | Small herbivorous mammal                            | Acute      | 270                    | 12.8       | 10      |
| Bare soil                                                  | Small granivorous mammal                            | Long-term  | 6.30                   | 23.8       | 5       |
| Fruiting vegetables                                        | Small herbivorous mammal                            | Long-term  | 69.0                   | <b>2.2</b> | 5       |
| Tier 1 (Mammals) (surrogate crop scenario)                 |                                                     |            |                        |            |         |
| Grassland All season                                       | Large herbivorous mammal                            | Long-term  | 16.5                   | 9.1        | 5       |
| Grassland Late                                             | Small insectivorous mammal                          | Long-term  | 1.81                   | 82.9       | 5       |
| Grassland All season                                       | Small herbivorous mammal                            | Long-term  | 69.0                   | <b>2.2</b> | 5       |
| Grassland Late season (seed heads)                         | Small omnivorous mammal                             | Long-term  | 6.30                   | 23.8       | 5       |

| <b>The use of glyphosate in railway tracks: Uses 7 a-b</b> |                                                     |            |                        |            |         |
|------------------------------------------------------------|-----------------------------------------------------|------------|------------------------|------------|---------|
| <b>1 × 1800 g/ha and 2 × 1800 g/ha, 90 days apart</b>      |                                                     |            |                        |            |         |
| Crop scenario                                              | Screening Indicator or Tier 1 generic focal species | Time scale | DDD (mg/kg bw per day) | TER        | Trigger |
| Leafy vegetables<br>BBCH 10 - 19                           | Small insectivorous mammal                          | Long-term  | 4.01                   | 37.4       | 5       |
| Leafy vegetables<br>BBCH ≥ 20                              | Small insectivorous mammal                          | Long-term  | 1.81                   | 82.9       | 5       |
| Leafy vegetables<br>BBCH 40 - 49                           | Small herbivorous mammal                            | Long-term  | 69.0                   | <b>2.2</b> | 5       |
| Leafy vegetables<br>BBCH ≥ 50                              | Small herbivorous mammal                            | Long-term  | 20.7                   | 7.2        | 5       |
| Leafy vegetables<br>All season                             | Large herbivorous mammal                            | Long-term  | 13.6                   | 11.0       | 5       |
| Leafy vegetables<br>BBCH 10 – 49                           | Small omnivorous mammal                             | Long-term  | 7.44                   | 20.2       | 5       |
| Leafy vegetables<br>BBCH ≥ 50                              | Small omnivorous mammal                             | Long-term  | 2.19                   | 68.5       | 5       |
| <b>Higher tier</b>                                         |                                                     |            |                        |            |         |
| Grassland and leafy vegetables                             | Small herbivorous mammal                            | Long-term  | 0.32*                  | 469        | 5       |

\*based on 0.47% drift rate to adjacent areas, no small mammals assumed present below the trains.

| <b>The use of glyphosate in invasives species: Uses 8 and 9</b> |                                                     |            |                        |     |         |
|-----------------------------------------------------------------|-----------------------------------------------------|------------|------------------------|-----|---------|
| <b>1 × 1800 g/ha</b>                                            |                                                     |            |                        |     |         |
| Crop scenario                                                   | Screening Indicator or Tier 1 generic focal species | Time scale | DDD (mg/kg bw per day) | TER | Trigger |
| <b>Screening Step (Mammals)</b>                                 |                                                     |            |                        |     |         |
| Bare soil                                                       | Small granivorous mammal                            | Acute      | 25.9                   | 133 | 10      |

| <b>The use of glyphosate in invasives species: Uses 8 and 9</b> |                                                     |            |                        |            |         |
|-----------------------------------------------------------------|-----------------------------------------------------|------------|------------------------|------------|---------|
| <b>1 × 1800 g/ha</b>                                            |                                                     |            |                        |            |         |
| Crop scenario                                                   | Screening Indicator or Tier 1 generic focal species | Time scale | DDD (mg/kg bw per day) | TER        | Trigger |
| Bush and cane fruit                                             | Small herbivorous mammal                            | Acute      | 147                    | 23.4       | 10      |
| Bulbs and onion like crops                                      | Small herbivorous mammal                            | Acute      | 213                    | 16.2       | 10      |
| Fruiting vegetables                                             | Small herbivorous mammal                            | Acute      | 246                    | 14.0       | 10      |
| Bare soil                                                       | Small granivorous mammal                            | Long-term  | 6.30                   | 23.8       | 5       |
| Bush and cane fruit                                             | Small herbivorous mammal                            | Long-term  | 41.4                   | <b>3.6</b> | 5       |
| Bulbs and onion like crops                                      | Small herbivorous mammal                            | Long-term  | 46.1                   | <b>3.3</b> | 5       |
| Fruiting vegetables                                             | Small herbivorous mammal                            | Long-term  | 69.0                   | <b>2.2</b> | 5       |
| Tier 1 (Mammals)<br>(surrogate crop scenario)                   |                                                     |            |                        |            |         |
| Bulbs & onion like crops<br>BBCH 10 – 19                        | Small insectivorous mammal                          | Long-term  | 4.01                   | 37.4       | 5       |
| Bulbs & onion like crops<br>BBCH 10 – 39                        | Small omnivorous mammal                             | Long-term  | 7.44                   | 20.2       | 5       |
| Cereals<br>Early (shoots)                                       | Large herbivorous mammal                            | Long-term  | 21.3                   | 7.0        | 5       |
| Fruiting vegetables<br>BBCH 10 – 49                             | Small herbivorous mammal                            | Long-term  | 69.0                   | <b>2.2</b> | 5       |
| Higher tier                                                     |                                                     |            |                        |            |         |
| Fruiting vegetables<br>BBCH 10 – 49                             | Small herbivorous mammal                            | Long-term  | 10.4*                  | 14.5       | 5       |

\* based on 85% foliar interception from FOCUSgw. Note that this approach presumes that the treated plant itself is not attractive as a food source. Further, the refinement of foliar interception is not relevant for treatments to cut stems or less established plants. Interception value not suitable in the case of the uses to cut-stem (included in the GAP) or treatment of less established plants. In these cases a qualitative argumentation was agreed considering the application is via spot treatment and applications to cut-stem and young plants are not expected to be made to the extensive areas of the field.

Risk from bioaccumulation and food chain behaviour

Since the log  $K_{ow}$  values of glyphosate, HMPA and AMPA do not exceed 3, formal assessment of the secondary poisoning risk to birds and mammals is not required.

Risk from consumption of contaminated water

The leaf scenario does not apply to the proposed uses of MON 52276; water that is collected in leaf whorls after application and applies to leafy vegetables forming heads or with a morphology that facilitates collection of rain / irrigation water sufficiently to attract birds, i.e. for the before named crops at BBCH  $\geq 41$ .

*Puddle scenario*, Screening step

Avian:  $1800 / 117 = 15.4$  which is less than the trigger of 50. No further assessment required.

Mammal:  $1800 / 150 = 12$  which is less than the trigger of 50. No further assessment required.

**Toxicity data for all aquatic tested species (Regulation (EU) N° 283/2013, Annex Part A, points 8.2 and Regulation (EU) N° 284/2013 Annex Part A, point 10.2)**

| Group                      | Test substance                         | Time-scale<br>(Test type)     | End point                               | Toxicity <sup>1</sup>                                                                                            |
|----------------------------|----------------------------------------|-------------------------------|-----------------------------------------|------------------------------------------------------------------------------------------------------------------|
| Laboratory tests           |                                        |                               |                                         |                                                                                                                  |
| Fish                       |                                        |                               |                                         |                                                                                                                  |
| <i>Oncorhynchus mykiss</i> | a.s.<br>(Glyphosate K-salt)            | Acute 96 hr<br>(static)       | Mortality, LC <sub>50</sub><br><br>NOEC | >1193 mg<br>a.e./L <sub>(nom)</sub><br><br>149 mg<br>a.e./L <sub>(nom)</sub>                                     |
| <i>Oncorhynchus mykiss</i> | a.s.<br>(Glyphosate acid)              | Acute 96 hr<br>(static)       | Mortality, LC <sub>50</sub><br><br>NOEC | >100 mg<br>a.e./L <sub>(nom)</sub><br><br>32 mg a.e./L <sub>(nom)</sub>                                          |
| <i>Oncorhynchus mykiss</i> | a.s.<br>(Glyphosate-isopropylammonium) | Acute 96 hr<br>(static)       | Mortality, LC <sub>50</sub><br><br>NOEC | >1001 mg<br>a.e./L <sub>(nom)</sub><br><br>236 mg<br>a.e./L <sub>(nom)</sub>                                     |
| <i>Oncorhynchus mykiss</i> | a.s.<br>(Glyphosate technical)         | Acute 96 hr<br>(static)       | Mortality, LC <sub>50</sub><br><br>NOEC | >87.7 mg<br>a.e./L <sub>(gmm)</sub><br><br>87.7 mg<br>a.e./L <sub>(gmm)</sub>                                    |
| <i>Lepomis macrochirus</i> | a.s.<br>(Glyphosate acid)              | Acute 96 hr<br>(static)       | Mortality, LC <sub>50</sub><br><br>NOEC | > <b>32 mg</b><br><b>a.e./L<sub>(nom)</sub></b> <sup>1)</sup><br><br>32 mg a.e./L <sub>(nom)</sub> <sup>1)</sup> |
| <i>Cyprinus carpio</i>     | a.s.<br>(Glyphosate acid)              | Acute 96 hr<br>(semi-static)  | Mortality, LC <sub>50</sub><br><br>NOEC | >100 mg<br>a.e./L <sub>(nom)</sub><br><br>100 mg<br>a.e./L <sub>(nom)</sub>                                      |
| <i>Leuciscus idus</i>      | a.s.<br>(Glyphosate-isopropylammonium) | Acute 96 hr<br>(static)       | Mortality, LC <sub>50</sub><br><br>NOEC | >2282 mg<br>a.e./L <sub>(nom)</sub><br><br>2282 mg<br>a.e./L <sub>(nom)</sub>                                    |
| <i>Oncorhynchus mykiss</i> | AMPA                                   | Acute 96 hr<br>(static)       | Mortality, LC <sub>50</sub>             | >100 mg<br>AMPA/L <sub>(nom)</sub>                                                                               |
| <i>Oncorhynchus mykiss</i> | AMPA                                   | Acute 96 hr<br>(static)       | Mortality, LC <sub>50</sub>             | >180 mg<br>AMPA/L <sub>(nom)</sub>                                                                               |
| <i>Oncorhynchus mykiss</i> | AMPA                                   | Acute 96 hr<br>(static)       | Mortality, LC <sub>50</sub>             | 520 mg<br>AMPA/L <sub>(nom)</sub>                                                                                |
| <i>Oncorhynchus mykiss</i> | MON-52276                              | Acute 96 hr<br>(flow-through) | Mortality, LC <sub>50</sub>             | >989 mg prep./L<br>(>306 mg a.e./L<br>(mm))                                                                      |
| <i>Cyprinus carpio</i>     | MON-52276                              | Acute 96 hr<br>(flow-through) | Mortality, LC <sub>50</sub>             | >895 mg prep./L                                                                                                  |

| Group                        | Test substance                         | Time-scale (Test type)                           | End point                                                 | Toxicity <sup>1</sup><br>(>277 mg a.e./L <sub>(mm)</sub> ) |
|------------------------------|----------------------------------------|--------------------------------------------------|-----------------------------------------------------------|------------------------------------------------------------|
| <i>Oncorhynchus mykiss</i>   | a.s.<br>(Glyphosate acid)              | Chronic<br>85d (60d post hatch),<br>flow-through | Growth parameters and hatching success<br>NOEC            | 2.804 mg a.e./L (gm)                                       |
| <i>Brachydanio rerio</i>     | a.s.<br>(Glyphosate acid)              | Chronic (semi-static)                            | Mortality and behaviour NOEC                              | <b>1 mg a.e./L<sub>(nom)</sub></b><br>*                    |
| <i>Danio rerio</i>           | a.s.<br>(Glyphosate)                   | Chronic<br>21d                                   | Egg rate, embryo mortalities and hatching success<br>LOEC | 13.9 mg a.e./L (mm)                                        |
| <i>Oncorhynchus mykiss</i>   | Glyphosate                             | Chronic                                          | mortality, growth and reproduction, NOEC                  | 1 µg glyphosate/L<br>(only dose tested)                    |
| <i>Pimephales promelas</i>   | AMPA                                   | Chronic (flow-through)                           | Hatching success, survival or growth<br>NOEC              | 12 mg AMPA/L <sub>(mm)</sub>                               |
| <b>Aquatic invertebrates</b> |                                        |                                                  |                                                           |                                                            |
| <i>Daphnia magna</i>         | a.s.<br>(Glyphosate K – salt)          | 48 h (static)                                    | Mortality, EC <sub>50</sub>                               | 278 mg a.e./L <sub>(mm)</sub>                              |
| <i>Daphnia magna</i>         | a.s.<br>(Glyphosate-isopropylammonium) | 48 h (static)                                    | Mortality, EC <sub>50</sub>                               | >471 mg a.e./L <sub>(im)</sub>                             |
| <i>Daphnia magna</i>         | a.s.<br>(Glyphosate technical)         | 48 h (static)                                    | Mortality, EC <sub>50</sub>                               | >334 mg a.e./L <sub>(im)</sub>                             |
| <i>Daphnia magna</i>         | a.s.<br>(Glyphosate acid)              | 48 h (static)                                    | Mortality, EC <sub>50</sub>                               | >100 mg a.e./L <sub>(nom)</sub>                            |
| <i>Daphnia magna</i>         | a.s.<br>(Glyphosate acid)              | 48 h (static)                                    | Mortality, EC <sub>50</sub>                               | <b>40 mg a.e./L<sub>(nom)</sub></b>                        |
| <i>Daphnia magna</i>         | a.s.<br>(Glyphosate)                   | 48 h (static)                                    | Mortality, EC <sub>50</sub>                               | >100 mg a.e./L <sub>(nom)</sub>                            |
| <i>Daphnia magna</i>         | a.s.                                   | 48 h (static)                                    | Mortality, EC <sub>50</sub>                               | >45.64 mg a.e./L <sub>(nom)</sub>                          |

| Group                    | Test substance                         | Time-scale<br>(Test type) | End point                   | Toxicity <sup>1</sup>                              |
|--------------------------|----------------------------------------|---------------------------|-----------------------------|----------------------------------------------------|
|                          | (Glyphosate-isopropylammonium)         |                           |                             |                                                    |
| <i>Daphnia magna</i>     | a.s.<br>(Glyphosate technical)         | 48 h (static)             | Mortality, EC <sub>50</sub> | >62.5 mg a.e./L <sub>(nom)</sub>                   |
| <i>Daphnia magna</i>     | AMPA                                   | 48 h (static)             | Mortality, EC <sub>50</sub> | >100 mg AMPA/L <sub>(nom)</sub>                    |
| <i>Daphnia magna</i>     | AMPA                                   | 48 h (static)             | Mortality, EC <sub>50</sub> | >180 mg AMPA/L <sub>(nom)</sub>                    |
| <i>Daphnia magna</i>     | AMPA                                   | 48 h (static)             | Mortality, EC <sub>50</sub> | 690 mg AMPA/L <sub>(nom)</sub>                     |
| <i>Daphnia magna</i>     | HMPA                                   | 48 h (static)             | Mortality, EC <sub>50</sub> | >100 mg HMPA/L <sub>(nom)</sub>                    |
| <i>Crassostrea gigas</i> | a.s.<br>(Glyphosate acid)              | 48 h (static)             | Mortality, EC <sub>50</sub> | <b>40 mg a.e./L<sub>(nom)</sub></b>                |
| <i>Mysidopsis bahia</i>  | a.s.<br>(Glyphosate acid)              | 96 h                      | Mortality, EC <sub>50</sub> | 80 mg a.e./L <sub>(nom)</sub>                      |
| <i>Daphnia magna</i>     | a.s.<br>(Glyphosate acid)              | 48 h (static)             | Mortality, EC <sub>50</sub> | 199 mg a.e./L <sub>(mm)</sub> <sup>2</sup>         |
| <i>Daphnia magna</i>     | MON-52276                              | 48 h (flow-through)       | Mortality, EC <sub>50</sub> | 676 mg prep./L<br>(209 mg a.e./L <sub>(mm)</sub> ) |
| <i>Daphnia magna</i>     | a.s.<br>(Glyphosate acid)              | 21 d (semi-static)        | Reproduction, NOEC          | <b>12.5 mg a.e./L<sub>(nom)</sub></b>              |
| <i>Daphnia magna</i>     | a.s.<br>(Glyphosate)                   | 21 d (semi-static)        | Reproduction, NOEC          | 56 mg a.e./L <sub>(nom)</sub>                      |
| <i>Daphnia magna</i>     | a.s.<br>(Glyphosate-isopropylammonium) | 21 d (semi-static)        | Reproduction, NOEC          | 42.90 mg a.e./L <sub>(nom)</sub>                   |
| <i>Daphnia magna</i>     | a.s.<br>(Glyphosate)                   | 21 d (semi-static)        | Reproduction, NOEC          | 100 mg a.e./L <sub>(nom)</sub>                     |
| <i>Daphnia magna</i>     | a.s.<br>(Glyphosate)                   | 21 d (flow-through)       | Reproduction, NOEC          | 41 mg a.e./L <sub>(mm)</sub>                       |

| Group                                                                      | Test substance                      | Time-scale (Test type)                    | End point                                                                                            | Toxicity <sup>1</sup>                                                                        |
|----------------------------------------------------------------------------|-------------------------------------|-------------------------------------------|------------------------------------------------------------------------------------------------------|----------------------------------------------------------------------------------------------|
| <i>Daphnia magna</i>                                                       | AMPA                                | 21 d (semi-static)                        | Reproduction, NOEC                                                                                   | 15 mg AMPA/L <sub>(nom)</sub>                                                                |
| <i>Cherax quadricarinatus</i> (juveniles)                                  | a.s. (Glyphosate)                   | Chronic, 60 d (semi-static)               | Mortality, weight gain, NOEC                                                                         | 10 mg a.e./L <sup>3)</sup>                                                                   |
| <i>Neohelice granulata</i> (adult females)                                 | a.s. (Glyphosate)                   | Chronic, 3 months pre-reproductive period | Weight gain, NOEC                                                                                    | <0.02 mg a.e./L <sup>4)</sup>                                                                |
| <i>Neohelice granulata</i> (adult males)                                   | a.s. (Glyphosate)                   | Chronic, 30 d                             | Weight gain, NOEC                                                                                    | <1.27 mg a.e./L <sup>5)</sup>                                                                |
| <i>Neohelice granulata</i> (adult females)                                 | a.s. (Glyphosate)                   | Chronic, 32 d                             | NOEC                                                                                                 | <2.5 mg a.e./L <sup>6)</sup>                                                                 |
| <i>C. pulchellum</i> larvae.                                               | glyphosate                          | 7 days, semi-static                       | Mortality, NOEC<br>Growth rate, NOEC                                                                 | 2 mg/L (nom) (highest tested concentration) ##<br>1 mg/L (nom) <sup>7)</sup>                 |
| <b>Sediment-dwelling organisms</b>                                         |                                     |                                           |                                                                                                      |                                                                                              |
| <i>Chironomus riparius</i>                                                 | a.s. (Glyphosate acid)              | Water spiked (static)                     | NOEC                                                                                                 | 744 mg a.e./L                                                                                |
| <i>Chironomus riparius</i>                                                 | a.s. (Glyphosate acid)              | Sediment spiked (static)                  | NOEC <sub>emergence</sub><br>NOEC <sub>development</sub>                                             | 740 mg a.e./kg sed. (mm)<br><b>154 mg a.e./kg sed. (mm)</b>                                  |
| <i>Chironomus riparius</i>                                                 | AMPA                                | Water spiked (static)                     | NOEC <sub>all parameters</sub>                                                                       | 507.9 mg AMPA/L (nom)                                                                        |
| <i>Chironomus riparius</i>                                                 | AMPA                                | Sediment spiked (static)                  | NOEC <sub>all parameters</sub>                                                                       | 786.5 mg AMPA/kg(gm m)                                                                       |
| <b>Algae</b>                                                               |                                     |                                           |                                                                                                      |                                                                                              |
| <i>Pseudokirchneriella subcapitata</i> ( <i>Raphidocelis subcapitata</i> ) | a.s. (Glyphosate-isopropylammonium) | 96 h (static)                             | Growth rate:<br>72h ErC <sub>10</sub><br>72h ErC <sub>20</sub><br>72h ErC <sub>50</sub><br>72h NOErC | 2.62 mg a.e./L (gmm)<br>4.72 mg a.e./L (gmm)<br>14.5 mg a.e./L (gmm)<br>2.19 mg a.e./L (gmm) |



| Group                                                                         | Test substance            | Time-scale<br>(Test type) | End point                                                                                                                                                                                                                                                                              | Toxicity <sup>1</sup>                                                                                                                                                                                                                                                                                                                  |
|-------------------------------------------------------------------------------|---------------------------|---------------------------|----------------------------------------------------------------------------------------------------------------------------------------------------------------------------------------------------------------------------------------------------------------------------------------|----------------------------------------------------------------------------------------------------------------------------------------------------------------------------------------------------------------------------------------------------------------------------------------------------------------------------------------|
|                                                                               |                           |                           | 96h ErC <sub>10</sub><br>96h ErC <sub>20</sub><br>96h ErC <sub>50</sub><br>96h NOErC<br><br>Yield:<br>72h EyC <sub>10</sub><br>72h EyC <sub>20</sub><br>72h EyC <sub>50</sub><br>72h NOEyC<br><br>96h EyC <sub>10</sub><br>96h EyC <sub>20</sub><br>96h EyC <sub>50</sub><br>96h NOEyC | 4.4 mg a.e./L<br>(gmm)<br>6.65 mg a.e./L<br>(gmm)<br>14.7 mg a.e./L<br>(gmm)<br>4.82 mg a.e./L<br>(gmm)<br><br>1.77 mg a.e./L<br>(gmm)<br>2.42 mg a.e./L<br>(gmm)<br>4.4 mg a.e./L<br>(gmm)<br>2.19 mg a.e./L<br>(gmm)<br><br>2.17 mg a.e./L<br>(gmm)<br>2.92 mg a.e./L<br>(gmm)<br>5.11 mg a.e./L<br>(gmm)<br>2.19 mg a.e./L<br>(gmm) |
| <i>Selenastrum caprocornutum</i><br>( <i>Raphidocelis subcapitata</i> )       | a.s.<br>(Glyphosate acid) | 120h<br>(static)          | Growth rate:<br>72h ErC <sub>50</sub><br>72h NOErC<br><br>Yield:<br>72h EyC <sub>50</sub><br>72h NOEyC                                                                                                                                                                                 | 17.3 mg a.e./L<br>(nom)<br>10 mg a.e./L<br>(nom)<br><br>16.4 mg a.e./L<br>(nom)<br>10 mg a.e./L<br>(nom)                                                                                                                                                                                                                               |
| <i>Pseudokirchneriella subcapitata</i><br>( <i>Raphidocelis subcapitata</i> ) | a.s.<br>(Glyphosate)      | 72 h (static)             | Growth rate:<br>72h ErC <sub>10</sub><br><br>72h ErC <sub>50</sub>                                                                                                                                                                                                                     | 33 mg a.e./L<br>(nom)<br>54 mg a.e./L<br>(nom)                                                                                                                                                                                                                                                                                         |

| Group                                                                    | Test substance                 | Time-scale<br>(Test type) | End point                                                                                                                                                                                            | Toxicity <sup>1</sup>                                                                                                                                                                                       |
|--------------------------------------------------------------------------|--------------------------------|---------------------------|------------------------------------------------------------------------------------------------------------------------------------------------------------------------------------------------------|-------------------------------------------------------------------------------------------------------------------------------------------------------------------------------------------------------------|
|                                                                          |                                |                           | 72h NOErC<br><br>Biomass:<br>72h EbC <sub>10</sub><br><br>72h EbC <sub>50</sub><br><br>72h NOEbC                                                                                                     | 32 mg a.e./L<br>(nom)<br><br>18 mg a.e./L<br>(nom)<br><br>48 mg a.e./L<br>(nom)<br><br>10 mg a.e./L<br>(nom)                                                                                                |
| <i>Selenasstrum capricornutum</i><br>( <i>Raphidocelis subcapitata</i> ) | a.s.<br>(Glyphosate technical) | 168 h<br>(static)         | Growth rate:<br>72h ErC <sub>10</sub><br><br>72h ErC <sub>20</sub><br><br>72h ErC <sub>50</sub><br><br>Yield:<br>72h EyC <sub>10</sub><br><br>72h EyC <sub>20</sub><br><br>72h EyC <sub>50</sub>     | < 10 mg a.e./L<br>(nom)<br><br>10.8 mg a.e./L<br>(nom)<br><br>20.1 mg a.e./L<br>(nom)<br><br>< 10 mg a.e./L<br>(nom)<br><br>10.25 mg<br>a.e./L (nom)<br><br>12.11 mg<br>a.e./L (nom)                        |
| <i>Anabaena flos-aquae</i>                                               | a.s.<br>(Glyphosate technical) | 168 h<br>(static)         | Growth rate:<br><br>72h ErC <sub>50</sub><br><br>72-h NOErC<br><br>96h ErC <sub>50</sub><br><br>96-h NOErC<br><br>Yield:<br><br>72h EyC <sub>50</sub><br><br>72-h NOEyC<br><br>96h EyC <sub>50</sub> | 33.4 mg a.e./L<br>(nom)<br><br>10 mg a.e./L<br>(nom)<br><br>20.2 mg a.e./L<br>(nom)<br><br>10 mg a.e./L<br>(nom)<br><br>16.4 mg a.e./L<br>(nom)<br><br>10 mg a.e./L<br>(nom)<br><br>11.8 mg a.e./L<br>(nom) |

| Group                                                                         | Test substance              | Time-scale (Test type) | End point                                                                                                                                                                                            | Toxicity <sup>1</sup>                                                                                                                                                                             |
|-------------------------------------------------------------------------------|-----------------------------|------------------------|------------------------------------------------------------------------------------------------------------------------------------------------------------------------------------------------------|---------------------------------------------------------------------------------------------------------------------------------------------------------------------------------------------------|
|                                                                               |                             |                        | 96-h NOEC                                                                                                                                                                                            | ≥ 10 mg a.e./L (nom)                                                                                                                                                                              |
| <i>Navicula pelliculosa</i>                                                   | a.s. (Glyphosate technical) | 168 h (static)         | Growth rate:<br>72h ErC <sub>50</sub><br>72h NOEC<br>Yield:<br>72h EyC <sub>50</sub><br>72h NOEC                                                                                                     | 63.9 mg a.e./L (nom)<br>32 mg a.e./L (nom)<br>43.2 mg a.e./L (nom)<br>32 mg a.e./L (nom)                                                                                                          |
| <i>Skeletonema costatum</i>                                                   | a.s. (Glyphosate acid)      | 120 h (static)         | Growth rate:<br>72h ErC <sub>10</sub><br>72h ErC <sub>20</sub><br>72h ErC <sub>50</sub><br>72h NOEC<br>Yield:<br>72h EyC <sub>10</sub><br>72h EyC <sub>20</sub><br>72h EyC <sub>50</sub><br>72h NOEC | 1.87 mg a.e./L (nom)<br>2.98 mg a.e./L (nom)<br><b>13.5 mg a.e./L (nom)</b><br>5.6 mg a.e./L (nom)<br>5.22 mg a.e./L (nom)<br>6.38 mg a.e./L (nom)<br>8.99 mg a.e./L (nom)<br>5.6 mg a.e./L (nom) |
| <i>Pseudokirchneriella subcapitata</i><br>( <i>Raphidocelis subcapitata</i> ) | AMPA                        | 72h (static)           | Growth rate:<br>72h ErC <sub>10</sub><br>72h ErC <sub>20</sub><br>72h ErC <sub>50</sub><br>72h NOEC<br>Yield:<br>72h EyC <sub>10</sub><br>72h EyC <sub>20</sub>                                      | 92.8 mg AMPA/L (nom)<br>119 mg AMPA/L (nom)<br>191 mg AMPA/L (nom)<br>100 mg AMPA/L (nom)<br>58.2 mg AMPA/L (nom)                                                                                 |

| Group                           | Test substance | Time-scale<br>(Test type) | End point                                                                                                                                                                                                                                                                                                          | Toxicity <sup>1</sup>                                                                                                                                                                                                                                                                                                        |
|---------------------------------|----------------|---------------------------|--------------------------------------------------------------------------------------------------------------------------------------------------------------------------------------------------------------------------------------------------------------------------------------------------------------------|------------------------------------------------------------------------------------------------------------------------------------------------------------------------------------------------------------------------------------------------------------------------------------------------------------------------------|
|                                 |                |                           | 72h EyC <sub>50</sub><br>72h NOEyC                                                                                                                                                                                                                                                                                 | 72.5 mg<br>AMPA/L (nom)<br>110 mg<br>AMPA/L (nom)<br>46 mg<br>AMPA/L (nom)                                                                                                                                                                                                                                                   |
| <i>Raphidocelis subcapitata</i> | AMPA           | 72h (static)              | Growth rate:<br>72h ErC <sub>10</sub><br>72h ErC <sub>20</sub><br>72h ErC <sub>50</sub><br>72h NOErC<br><br>Yield:<br>72h EyC <sub>10</sub><br>72h EyC <sub>20</sub><br>72h EyC <sub>50</sub><br>72h NOEyC<br><br>Biomass:<br>72h EbC <sub>10</sub><br>72h EbC <sub>20</sub><br>72h EbC <sub>50</sub><br>72h NOEbC | 28.6 mg<br>AMPA/L (mm)<br>29.7 mg<br>AMPA/L (mm)<br>31.9 mg<br>AMPA/L (mm)<br>15.5 mg<br>AMPA/L (mm)<br><br>26.3 mg<br>AMPA/L (mm)<br>27.1 mg<br>AMPA/L (mm)<br>28.7 mg<br>AMPA/L (mm)<br>15.5 mg<br>AMPA/L (mm)<br><br>26.5 mg<br>AMPA/L (mm)<br>27.3 mg<br>AMPA/L (mm)<br>28.9 mg<br>AMPA/L (mm)<br>15.5 mg<br>AMPA/L (mm) |

| Group                                                                         | Test substance | Time-scale<br>(Test type) | End point                                                                                                                                                                                                                                                                                                                                                      | Toxicity <sup>1</sup>                                                                                                                                                                                                                                                                                                                                                                                                                                                                                                                  |
|-------------------------------------------------------------------------------|----------------|---------------------------|----------------------------------------------------------------------------------------------------------------------------------------------------------------------------------------------------------------------------------------------------------------------------------------------------------------------------------------------------------------|----------------------------------------------------------------------------------------------------------------------------------------------------------------------------------------------------------------------------------------------------------------------------------------------------------------------------------------------------------------------------------------------------------------------------------------------------------------------------------------------------------------------------------------|
| <i>Skeletonema costatum</i>                                                   | AMPA           | 72h (static)              | Growth rate:<br>72h ErC <sub>10</sub><br><br>72h ErC <sub>20</sub><br><br>72h ErC <sub>50</sub><br><br>72h NOErC<br><br><br>Yield:<br>72h EyC <sub>10</sub><br><br>72h EyC <sub>20</sub><br><br>72h EyC <sub>50</sub><br><br>72h NOEyC<br><br><br>Biomass:<br>72h EbC <sub>10</sub><br><br>72h EbC <sub>20</sub><br><br>72h EbC <sub>50</sub><br><br>72h NOEbC | ≥ 85.9 mg<br>AMPA/L <sub>(mm)</sub><br><br>≥ 85.9 mg<br>AMPA/L <sub>(mm)</sub><br><br>≥ 85.9 mg<br>AMPA/L <sub>(mm)</sub><br><br>85.9 mg<br>AMPA/L <sub>(mm)</sub><br><br><br><br>≥ 85.9 mg<br>AMPA/L <sub>(mm)</sub><br><br>≥ 85.9 mg<br>AMPA/L <sub>(mm)</sub><br><br>≥ 85.9 mg<br>AMPA/L <sub>(mm)</sub><br><br>85.9 mg<br>AMPA/L <sub>(mm)</sub><br><br><br><br>≥ 85.9 mg<br>AMPA/L <sub>(mm)</sub><br><br>≥ 85.9 mg<br>AMPA/L <sub>(mm)</sub><br><br>≥ 85.9 mg<br>AMPA/L <sub>(mm)</sub><br><br>85.9 mg<br>AMPA/L <sub>(mm)</sub> |
| <i>Pseudokirchneriella subcapitata</i><br>( <i>Raphidocelis subcapitata</i> ) | HMPA           | 72h (static)              | Growth rate:<br>72h ErC <sub>10</sub><br><br>72h ErC <sub>20</sub><br><br>72h ErC <sub>50</sub><br><br>72h NOErC<br><br><br>Yield:<br>72h EyC <sub>10</sub><br><br>72h EyC <sub>20</sub><br><br>72h EyC <sub>50</sub>                                                                                                                                          | >120 mg<br>HMPA/L <sub>(nom)</sub><br><br>>120 mg<br>HMPA/L <sub>(nom)</sub><br><br>>120 mg<br>HMPA/L <sub>(nom)</sub><br><br>60 mg<br>HMPA/L <sub>(nom)</sub><br><br><br><br>57.8 mg<br>HMPA/L <sub>(nom)</sub><br><br>80.4 mg<br>HMPA/L <sub>(nom)</sub><br><br>> 120 mg<br>HMPA/L <sub>(nom)</sub>                                                                                                                                                                                                                                  |

| Group                           | Test substance | Time-scale<br>(Test type) | End point                | Toxicity <sup>1</sup>                                |
|---------------------------------|----------------|---------------------------|--------------------------|------------------------------------------------------|
|                                 |                |                           | 72h NOEyC                | 60 mg<br>HMPA/L (nom)                                |
| <i>Raphidocelis subcapitata</i> | MON-52276      | 96 h (static)             | Growth rate<br>72h NOErC | 27.1 mg MON<br>52276/L (8.4<br>mg a.e./L) (nom)      |
|                                 |                |                           | 72h ErC <sub>10</sub>    | 80.9 mg MON<br>52276/L (25.1<br>mg a.e./L) (nom)     |
|                                 |                |                           | 72h ErC <sub>20</sub>    | 128.3 mg<br>MON 52276/L<br>(39.8 mg<br>a.e./L) (nom) |
|                                 |                |                           | 72h ErC <sub>50</sub>    | ≥ 271 mg<br>MON 52276/L<br>(84 mg a.e./L)<br>(nom)   |
|                                 |                |                           | 96h NOErC                | 2.71 mg MON<br>52276/L (0.84<br>mg a.e./L) (nom)     |
|                                 |                |                           | 96h ErC <sub>10</sub>    | 109.4 mg<br>MON 52276/L<br>(33.9 mg<br>a.e./L) (nom) |
|                                 |                |                           | 96h ErC <sub>20</sub>    | 161.3 mg<br>MON 52276/L<br>(50 mg a.e./L)<br>(nom)   |
|                                 |                |                           | 96h ErC <sub>50</sub>    | ≥ 271 mg<br>MON 52276/L<br>(84 mg a.e./L)<br>(nom)   |
|                                 |                |                           | Yield<br>72h NOEyC       | 27.1 mg MON<br>52276/L (8.4<br>mg a.e./L) (nom)      |
|                                 |                |                           | 72h EyC <sub>10</sub>    | 30.3 mg MON<br>52276/L (9.4<br>mg a.e./L) (nom)      |

| Group | Test substance | Time-scale<br>(Test type) | End point             | Toxicity <sup>1</sup>                                |
|-------|----------------|---------------------------|-----------------------|------------------------------------------------------|
|       |                |                           | 72h EyC <sub>20</sub> | 49.3 mg MON<br>52276/L (15.3<br>mg a.e./L) (nom)     |
|       |                |                           | 72h EyC <sub>50</sub> | 102.4 mg<br>MON 52276/L<br>(31.7 mg<br>a.e./L) (nom) |
|       |                |                           | 96h NOEyC             | 8.57 mg MON<br>52276/L (2.65<br>mg a.e./L) (nom)     |
|       |                |                           | 96h EyC <sub>10</sub> | 28.6 mg MON<br>52276/L (8.9<br>mg a.e./L) (nom)      |
|       |                |                           | 96h EyC <sub>20</sub> | 50.4 mg MON<br>52276/L (15.6<br>mg a.e./L) (nom)     |
|       |                |                           | 96h EyC <sub>50</sub> | 118.9 mg<br>MON 52276/L<br>(36.9 mg<br>a.e./L) (nom) |
|       |                |                           | Biomass<br>72h NOEbC  | 27.1 mg MON<br>52276/L (8.4<br>mg a.e./L) (nom)      |
|       |                |                           | 72h EbC <sub>10</sub> | 25.9 mg MON<br>52276/L (8.03<br>mg a.e./L) (nom)     |
|       |                |                           | 72h EbC <sub>20</sub> | 45.8 mg MON<br>52276/L (14.2<br>mg a.e./L) (nom)     |
|       |                |                           | 72h EbC <sub>50</sub> | 108.2 mg<br>MON 52276/L<br>(33.5 mg<br>a.e./L) (nom) |
|       |                |                           | 96h NOEbC             | 27.1 mg MON<br>52276/L (8.4<br>mg a.e./L) (nom)      |

| Group               | Test substance                                 | Time-scale<br>(Test type) | End point                                                                                                                                                                                                                                                                                                                                                             | Toxicity <sup>1</sup>                                                                                                                                                                                                                                                                                                    |
|---------------------|------------------------------------------------|---------------------------|-----------------------------------------------------------------------------------------------------------------------------------------------------------------------------------------------------------------------------------------------------------------------------------------------------------------------------------------------------------------------|--------------------------------------------------------------------------------------------------------------------------------------------------------------------------------------------------------------------------------------------------------------------------------------------------------------------------|
|                     |                                                |                           | 96h EbC <sub>10</sub>                                                                                                                                                                                                                                                                                                                                                 | 31.1 mg MON<br>52276/L (9.6<br>mg a.e./L) (nom)                                                                                                                                                                                                                                                                          |
|                     |                                                |                           | 96h EbC <sub>20</sub>                                                                                                                                                                                                                                                                                                                                                 | 52.5 mg MON<br>52276/L (16.3<br>mg a.e./L) (nom)                                                                                                                                                                                                                                                                         |
|                     |                                                |                           | 96h EbC <sub>50</sub>                                                                                                                                                                                                                                                                                                                                                 | 115.5 mg<br>MON 52276/L<br>(35.8 mg<br>a.e./L) (nom)                                                                                                                                                                                                                                                                     |
| <b>Higher plant</b> |                                                |                           |                                                                                                                                                                                                                                                                                                                                                                       |                                                                                                                                                                                                                                                                                                                          |
| <i>Lemna minor</i>  | a.s.<br>(Glyphosate-<br>isopropylammo<br>nium) | 7d (static)               | <u>Fronds number</u><br>Growth rate:<br>7d ErC <sub>10</sub><br><br>7d ErC <sub>20</sub><br><br>7d ErC <sub>50</sub><br><br>7d NOErC<br><br>Yield:<br>7d EyC <sub>10</sub><br><br>7d EyC <sub>20</sub><br><br>7d EyC <sub>50</sub><br><br>7d NOEyC<br><br><u>Dry weight</u><br><br>Yield:<br>7d EyC <sub>50</sub><br><br>7d NOEyC<br><br><u>Phytotoxicity</u><br>NOEC | 8.16 mg a.e./L<br>(nom)<br>12.8 mg a.e./L<br>(nom)<br>30.3 mg a.e./L<br>(nom)<br>8.65 mg a.e./L<br>(nom)<br><br>7.8 mg a.e./L<br>(nom)<br>10.3 mg a.e./L<br>(nom)<br>16.5 mg a.e./L<br>(nom)<br>8.65 mg a.e./L<br>(nom)<br><br><br><br>32.1 mg a.e./L<br>(nom)<br>8.65 mg a.e./L<br>(nom)<br><br>8.65 mg a.e./L<br>(nom) |



| Group              | Test substance                 | Time-scale<br>(Test type) | End point                                                                                                                                                                                                                                              | Toxicity <sup>1</sup>                                                                                                                                                                                                                     |
|--------------------|--------------------------------|---------------------------|--------------------------------------------------------------------------------------------------------------------------------------------------------------------------------------------------------------------------------------------------------|-------------------------------------------------------------------------------------------------------------------------------------------------------------------------------------------------------------------------------------------|
| <i>Lemna gibba</i> | a.s.<br>(Glyphosate acid)      | 14d (semi-static)         | <u>Fronds number</u><br>Growth rate:<br>7d ErC <sub>10</sub><br>7d ErC <sub>20</sub><br>7d ErC <sub>50</sub><br>7d NOErC<br>Yield:<br>7d EyC <sub>10</sub><br>7d EyC <sub>20</sub><br>7d EyC <sub>50</sub><br>7d NOEyC<br><u>Phytotoxicity</u><br>NOEC | 13.3 mg a.e./L<br>(nom)<br>18.7 mg a.e./L<br>(nom)<br>36.0 mg a.e./L<br>(nom)<br>12 mg a.e./L<br>(nom)<br>10.5 mg a.e./L<br>(nom)<br>14.2 mg a.e./L<br>(nom)<br>24.0 mg a.e./L<br>(nom)<br>6 mg a.e./L<br>(nom)<br>1.5 mg a.e./L<br>(nom) |
| <i>Lemna gibba</i> | a.s.<br>(Glyphosate technical) | 14d (semi-static)         | <u>Fronds number</u><br>Growth rate:<br>7d ErC <sub>10</sub><br>7d ErC <sub>20</sub><br>7d ErC <sub>50</sub><br>7d NOErC<br>Yield:<br>7d EyC <sub>10</sub><br>7d EyC <sub>20</sub><br>7d EyC <sub>50</sub><br>7d NOEyC                                 | 20.8 mg a.e./L<br>(mm)<br>31.9 mg a.e./L<br>(mm)<br>>49.4 mg<br>a.e./L (mm)<br>16.6 mg a.e./L<br>(mm)<br>18.2 mg a.e./L<br>(mm)<br>20.3 mg a.e./L<br>(mm)<br>25.0 mg a.e./L<br>(mm)<br>16.6 mg a.e./L<br>(mm)                             |
| <i>Lemna gibba</i> | a.s.                           | 7d (static)               | <u>Fronds number</u><br>Growth rate:                                                                                                                                                                                                                   |                                                                                                                                                                                                                                           |

| Group | Test substance         | Time-scale<br>(Test type) | End point                                                 | Toxicity <sup>1</sup>    |
|-------|------------------------|---------------------------|-----------------------------------------------------------|--------------------------|
|       | (Glyphosate technical) |                           | 7d ErC <sub>10</sub>                                      | 3.79 mg a.e./L<br>(nom)  |
|       |                        |                           | 7d ErC <sub>20</sub>                                      | 8.01 mg a.e./L<br>(nom)  |
|       |                        |                           | 7d ErC <sub>50</sub>                                      | 28.7 mg a.e./L<br>(nom)  |
|       |                        |                           | 7d NOErC                                                  | 3.05 mg a.e./L<br>(nom)  |
|       |                        |                           | Yield:<br>7d EyC <sub>10</sub>                            | 2.50 mg a.e./L<br>(nom)  |
|       |                        |                           | 7d EyC <sub>20</sub>                                      | 4.37 mg a.e./L<br>(nom)  |
|       |                        |                           | 7d EyC <sub>50</sub>                                      | 11.3 mg a.e./L<br>(nom)  |
|       |                        |                           | 7d NOEyC                                                  | 3.05 mg a.e./L<br>(nom)  |
|       |                        |                           | <u>Dry weight</u><br>Growth rate:<br>7d ErC <sub>10</sub> | 5.29 mg a.e./L<br>(nom)  |
|       |                        |                           | 7d ErC <sub>20</sub>                                      | 18.4 mg a.e./L<br>(nom)  |
|       |                        |                           | 7d ErC <sub>50</sub>                                      | >100 mg a.e./L<br>(nom)  |
|       |                        |                           | 7d NOErC                                                  | 9.77 mg a.e./L<br>(nom)  |
|       |                        |                           | Yield:<br>7d EyC <sub>10</sub>                            | 2.50 mg a.e./L<br>(nom)  |
|       |                        |                           | 7d EyC <sub>20</sub>                                      | 5.86 mg a.e./L<br>(nom)  |
|       |                        |                           | 7d EyC <sub>50</sub>                                      | 25.1 mg a.e./L<br>(nom)  |
|       |                        |                           | 7d NOEyC                                                  | 3.05 mg a.e./L<br>(nom)  |
|       |                        |                           | <u>Phytotoxicity</u><br>7d NOEC                           | <3.05 mg<br>a.e./L (nom) |

| Group                        | Test substance       | Time-scale<br>(Test type) | End point                                                                                                                                                                                                                                                                                                                                                                                                                                                                                                                                                       | Toxicity <sup>1</sup>                                                                                                                                                                                                                                                                                                                                                                                                                                                                                  |
|------------------------------|----------------------|---------------------------|-----------------------------------------------------------------------------------------------------------------------------------------------------------------------------------------------------------------------------------------------------------------------------------------------------------------------------------------------------------------------------------------------------------------------------------------------------------------------------------------------------------------------------------------------------------------|--------------------------------------------------------------------------------------------------------------------------------------------------------------------------------------------------------------------------------------------------------------------------------------------------------------------------------------------------------------------------------------------------------------------------------------------------------------------------------------------------------|
| <i>Myriophyllum spicatum</i> | a.s.<br>(Glyphosate) | 14 d (static)             | Shoot length<br>Growth rate<br>14d NOErC<br><br>14d ErC <sub>10</sub><br><br>14d ErC <sub>20</sub><br><br>14d ErC <sub>50</sub><br><br>Yield<br>14d NOEyC<br><br>14d EyC <sub>10</sub><br><br>14d EyC <sub>20</sub><br><br>14d EyC <sub>50</sub><br><br>Shoot fresh weight<br>Growth rate<br>14d NOErC<br><br>14d ErC <sub>10</sub><br><br>14d ErC <sub>20</sub><br><br>14d ErC <sub>50</sub><br><br>Yield<br>14d NOEyC<br><br>14d EyC <sub>10</sub><br><br>14d EyC <sub>20</sub><br><br>14d EyC <sub>50</sub><br><br>Shoot dry weight<br>weight<br>Growth rate | 12.7 mg a.e./L<br>(gmm)<br><br>38.2 mg a.e./L<br>(gmm)<br><br>68.3 mg a.e./L<br>(gmm)<br><br>208 mg a.e./L<br>(gmm)<br><br>4.69 mg a.e./L<br>(gmm)<br><br>5.26 mg a.e./L<br>(gmm)<br><br>11.5 mg a.e./L<br>(gmm)<br><br>51.5 mg a.e./L<br>(gmm)<br><br>4.69 mg a.e./L<br>(gmm)<br><br>5.41 mg a.e./L<br>(gmm)<br><br>17.4 mg a.e./L<br>(gmm)<br><br>163 mg a.e./L<br>(gmm)<br><br>4.69 mg a.e./L<br>(gmm)<br><br>3.00 mg a.e./L<br>(gmm)<br><br>8.19 mg a.e./L<br>(gmm)<br><br>55.9 mg a.e./L<br>(gmm) |

| Group                         | Test substance | Time-scale<br>(Test type) | End point               | Toxicity <sup>1</sup>    |
|-------------------------------|----------------|---------------------------|-------------------------|--------------------------|
|                               |                |                           | 14d NOErC               | 445 mg a.e./L<br>(gmm)   |
|                               |                |                           | 14d ErC <sub>10</sub>   | > 445 mg<br>a.e./L (gmm) |
|                               |                |                           | 14d ErC <sub>20</sub>   | > 445 mg<br>a.e./L (gmm) |
|                               |                |                           | 14d ErC <sub>50</sub>   | > 445 mg<br>a.e./L (gmm) |
|                               |                |                           | Yield                   |                          |
|                               |                |                           | 14d NOEyC               | 445 mg a.e./L<br>(gmm)   |
|                               |                |                           | 14d EyC <sub>10</sub>   | > 445 mg<br>a.e./L (gmm) |
|                               |                |                           | 14d EyC <sub>20</sub>   | > 445 mg<br>a.e./L (gmm) |
|                               |                |                           | 14d EyC <sub>50</sub>   | > 445 mg<br>a.e./L (gmm) |
|                               |                |                           | Root length<br>14d NOEC | 4.69 mg a.e./L<br>(gmm)  |
| <i>Myriophyllum aquaticum</i> | AMPA           | 14 d (static)             | Shoot length            |                          |
|                               |                |                           | Growth rate             |                          |
|                               |                |                           | 14d ErC <sub>10</sub>   | 6.1 mg<br>AMPA/L (mm)    |
|                               |                |                           | 14d ErC <sub>20</sub>   | 22.5 mg<br>AMPA/L (mm)   |
|                               |                |                           | 14d ErC <sub>50</sub>   | > 94.6 mg<br>AMPA/L (mm) |
|                               |                |                           | 14d NOErC               | 14.3 mg<br>AMPA/L (mm)   |
|                               |                |                           | Yield                   |                          |
|                               |                |                           | 14d EyC <sub>10</sub>   | 1.3 mg<br>AMPA/L (mm)    |
|                               |                |                           | 14d EyC <sub>20</sub>   | 5.8 mg<br>AMPA/L (mm)    |
|                               |                |                           | 14d EyC <sub>50</sub>   | > 94.6 mg<br>AMPA/L (mm) |
|                               |                |                           | 14d NOEyC               | 5.43 mg<br>AMPA/L (mm)   |
|                               |                |                           | Shoot fresh weight      |                          |
|                               |                |                           | Growth rate             |                          |
|                               |                |                           | 14d ErC <sub>10</sub>   | 24.2 mg<br>AMPA/L (mm)   |

| Group | Test substance | Time-scale<br>(Test type) | End point               | Toxicity <sup>1</sup>               |
|-------|----------------|---------------------------|-------------------------|-------------------------------------|
|       |                |                           | 14d ErC <sub>20</sub>   | 39 mg<br>AMPA/L (mm)<br>> 94.6 mg   |
|       |                |                           | 14d ErC <sub>50</sub>   | AMPA/L (mm)<br>14.3 mg              |
|       |                |                           | 14d NOErC               | AMPA/L (mm)                         |
|       |                |                           | <b>Yield</b>            |                                     |
|       |                |                           | 14d EyC <sub>10</sub>   | 19.7 mg<br>AMPA/L (mm)              |
|       |                |                           | 14d EyC <sub>20</sub>   | 30.6 mg<br>AMPA/L (mm)              |
|       |                |                           | 14d EyC <sub>50</sub>   | 70.8 mg<br>AMPA/L (mm)              |
|       |                |                           | 14d NOEyC               | 14.3 mg<br>AMPA/L (mm)              |
|       |                |                           | <b>Shoot dry weight</b> |                                     |
|       |                |                           | <b>Growth rate</b>      |                                     |
|       |                |                           | 14d ErC <sub>10</sub>   | 38.4 mg<br>AMPA/L (mm)<br>= 47.6 mg |
|       |                |                           | 14d ErC <sub>20</sub>   | AMPA/L (mm)<br>72 mg                |
|       |                |                           | 14d ErC <sub>50</sub>   | AMPA/L (mm)<br>37.1 mg              |
|       |                |                           | 14d NOErC               | AMPA/L (mm)                         |
|       |                |                           | <b>Yield</b>            |                                     |
|       |                |                           | 14d EyC <sub>10</sub>   | 33.9 mg<br>AMPA/L (mm)              |
|       |                |                           | 14d EyC <sub>20</sub>   | 42 mg<br>AMPA/L (mm)                |
|       |                |                           | 14d EyC <sub>50</sub>   | 63.2 mg<br>AMPA/L (mm)              |
|       |                |                           | 14d NOEyC               | 37.1 mg<br>AMPA/L (mm)              |
|       |                |                           | <b>Root length</b>      |                                     |
|       |                |                           | <b>Growth rate</b>      |                                     |
|       |                |                           | 14d ErC <sub>10</sub>   | 17 mg<br>AMPA/L (mm)                |
|       |                |                           | 14d ErC <sub>20</sub>   | 35.9 mg<br>AMPA/L (mm)              |
|       |                |                           | 14d ErC <sub>50</sub>   | > 94.6 mg<br>AMPA/L (mm)            |
|       |                |                           | 14d NOErC               | 14.3 mg<br>AMPA/L (mm)              |

| Group              | Test substance | Time-scale (Test type) | End point                                                                                                                                                                                                                               | Toxicity <sup>1</sup>                                                                                                                                                                                                                |
|--------------------|----------------|------------------------|-----------------------------------------------------------------------------------------------------------------------------------------------------------------------------------------------------------------------------------------|--------------------------------------------------------------------------------------------------------------------------------------------------------------------------------------------------------------------------------------|
|                    |                |                        | Yield<br>14d EyC <sub>10</sub><br>14d EyC <sub>20</sub><br>14d EyC <sub>50</sub><br>14d NOEyC                                                                                                                                           | 5.1 mg<br>AMPA/L (mm)<br>9.5 mg<br>AMPA/L (mm)<br>31.1 mg<br>AMPA/L (mm)<br>2.23 mg<br>AMPA/L (mm)                                                                                                                                   |
| <i>Lemna gibba</i> | HMPA           | 7 d (semi-static)      | Frond number/biomass/dry weight<br><br>Growth rate<br>7d ErC <sub>10</sub><br>7d ErC <sub>20</sub><br>7d ErC <sub>50</sub><br>7d NOErC<br><br>Yield<br>7d EyC <sub>10</sub><br>7d EyC <sub>20</sub><br>7d EyC <sub>50</sub><br>7d NOEyC | <br><br>> 123 mg<br>HMPA/L (nom)<br>> 123 mg<br>HMPA/L (nom)<br>> 123 mg<br>HMPA/L (nom)<br>123 mg<br>HMPA/L (nom)<br><br>> 123 mg<br>HMPA/L (nom)<br>> 123 mg<br>HMPA/L (nom)<br>> 123 mg<br>HMPA/L (nom)<br>123 mg<br>HMPA/L (nom) |

|                      |                                                                           |                   |                      |                                                                          |
|----------------------|---------------------------------------------------------------------------|-------------------|----------------------|--------------------------------------------------------------------------|
| <i>Lemna gibba</i>   | MON 52276                                                                 | 7 d (semi-static) | <u>Fronds number</u> |                                                                          |
|                      |                                                                           |                   | Growth rate:         |                                                                          |
|                      |                                                                           |                   | 7d ErC <sub>50</sub> | >150 mg prep./L <sub>(nom)</sub><br>(>46.35 mg a.e./L <sub>(nom)</sub> ) |
|                      |                                                                           |                   | 7d NOErC             | 19.1 mg prep./L <sub>(nom)</sub><br>(5.90 mg a.e./L <sub>(nom)</sub> )   |
|                      |                                                                           |                   | Yield:               |                                                                          |
|                      |                                                                           |                   | 7d EyC <sub>50</sub> | 66.58 mg prep./L <sub>(nom)</sub><br>(20.57 mg a.e./L <sub>(nom)</sub> ) |
|                      |                                                                           |                   | 7d NOEyC             | 19.1 mg prep./L <sub>(nom)</sub><br>(5.90 mg a.e./L <sub>(nom)</sub> )   |
|                      |                                                                           |                   | <u>Dry weight</u>    |                                                                          |
|                      |                                                                           |                   | Growth rate:         |                                                                          |
|                      |                                                                           |                   | 7d ErC <sub>10</sub> | 51.2 mg MON 52276/L<br>(15.8 mg a.e./L)                                  |
| 7d ErC <sub>20</sub> | 110.1 mg MON 52276/L<br>(34 mg a.e./L)                                    |                   |                      |                                                                          |
| 7d ErC <sub>50</sub> | > 150 mg MON 52276/L<br>(36.51 mg a.e./L)                                 |                   |                      |                                                                          |
| 7d NOErC             | 19.1 mg MON 52276/L<br>5.90 mg a.e./L)                                    |                   |                      |                                                                          |
| Yield:               |                                                                           |                   |                      |                                                                          |
| 7d EyC <sub>50</sub> | 118.16 mg prep./L <sub>(nom)</sub><br>(36.51 mg a.e./L <sub>(nom)</sub> ) |                   |                      |                                                                          |
| 7d NOEyC             | 19.1 mg prep./L <sub>(nom)</sub>                                          |                   |                      |                                                                          |

| Group                         | Test substance | Time-scale<br>(Test type) | End point                                                                                                                                                                                                                                                                                                                                                                                             | Toxicity <sup>1</sup>                                                                                                                                                                                                                                                                                                                                                                                                                                                                                                                                                                                                                                                                                                                                |
|-------------------------------|----------------|---------------------------|-------------------------------------------------------------------------------------------------------------------------------------------------------------------------------------------------------------------------------------------------------------------------------------------------------------------------------------------------------------------------------------------------------|------------------------------------------------------------------------------------------------------------------------------------------------------------------------------------------------------------------------------------------------------------------------------------------------------------------------------------------------------------------------------------------------------------------------------------------------------------------------------------------------------------------------------------------------------------------------------------------------------------------------------------------------------------------------------------------------------------------------------------------------------|
|                               |                |                           |                                                                                                                                                                                                                                                                                                                                                                                                       | (5.90 mg a.e./L <sub>(nom)</sub> )                                                                                                                                                                                                                                                                                                                                                                                                                                                                                                                                                                                                                                                                                                                   |
| <i>Myriophyllum aquaticum</i> | MON 52276      | 14d (static)              | Shoot length<br>Growth rate<br>14d ErC <sub>10</sub><br><br>14d ErC <sub>20</sub><br><br>14d ErC <sub>50</sub><br><br>14d NOErC<br><br><br>Yield<br>14d EyC <sub>10</sub><br><br>14d EyC <sub>20</sub><br><br>14d EyC <sub>50</sub><br><br>14d NOEyC<br><br><br>Shoot fresh weight<br>Growth rate<br>14d ErC <sub>10</sub><br><br>14d ErC <sub>20</sub><br><br>14d ErC <sub>50</sub><br><br>14d NOErC | <br><br>3.46 mg prep./L (1.07 mg a.e./L) <sub>(mm)</sub><br><br>12.42 mg prep./L (3.81 mg a.e./L) <sub>(mm)</sub><br><br>139.5 mg prep./L (42.79 mg a.e./L) <sub>(mm)</sub><br><br>3.59 mg prep./L (1.1 mg a.e./L) <sub>(mm)</sub><br><br><br>1.39 mg prep./L (0.43 mg a.e./L) <sub>(mm)</sub><br><br>4.60 mg prep./L (1.41 mg a.e./L) <sub>(mm)</sub><br><br>43.81 mg prep./L (13.44 mg a.e./L) <sub>(mm)</sub><br><br>3.59 mg prep./L (1.1 mg a.e./L) <sub>(mm)</sub><br><br><br><br><br><br><br><br>< 0.98 mg prep./L (< 0.3 mg a.e./L) <sub>(mm)</sub><br><br><br>2.15 mg prep./L (0.66 mg a.e./L) <sub>(mm)</sub><br><br>33.67 mg prep./L ( <b>10.33 mg a.e./L</b> ) <sub>(mm)</sub><br><br>< 0.98 mg prep./L (< 0.3 mg a.e./L) <sub>(mm)</sub> |



| Group | Test substance | Time-scale<br>(Test type) | End point                                                | Toxicity <sup>1</sup>                          |
|-------|----------------|---------------------------|----------------------------------------------------------|------------------------------------------------|
|       |                |                           | Yield<br>14d EyC <sub>10</sub>                           | <0.98 mg<br>prep./L (<0.3<br>mg a.e./L) (mm)   |
|       |                |                           | 14d EyC <sub>20</sub>                                    | 1.27 mg<br>prep./L (0.39<br>mg a.e./L) (mm)    |
|       |                |                           | 14d EyC <sub>50</sub>                                    | 14.47 mg<br>prep./L (4.44<br>mg a.e./L) (mm)   |
|       |                |                           | 14d NOEyC                                                | < 0.98 mg<br>prep./L (< 0.3<br>mg a.e./L) (mm) |
|       |                |                           | Shoot dry weight<br>Growth rate<br>14d ErC <sub>10</sub> | 1.42 mg<br>prep./L (0.44<br>mg a.e./L) (mm)    |
|       |                |                           | 14d ErC <sub>20</sub>                                    | 10.52 mg<br>prep./L (3.23<br>mg a.e./L) (mm)   |
|       |                |                           | 14d ErC <sub>50</sub>                                    | 467.1 mg<br>prep./L (143.3<br>mg a.e./L) (mm)  |
|       |                |                           | Yield<br>14d EyC <sub>10</sub>                           | < 0.98 mg<br>prep./L (< 0.3<br>mg a.e./L) (mm) |
|       |                |                           | 14d EyC <sub>50</sub>                                    | >473 mg<br>prep./L (>145<br>mg a.e./L) (mm)    |
|       |                |                           | Root length<br>Growth rate<br>14d ErC <sub>10</sub>      | 7.22 mg<br>prep./L (2.23<br>mg a.e./L) (mm)    |
|       |                |                           | 14d ErC <sub>20</sub>                                    | 20.63 mg<br>prep./L (6.33<br>mg a.e./L) (mm)   |
|       |                |                           | 14d ErC <sub>50</sub>                                    | 151.6 mg<br>prep./L (46.5<br>mg a.e./L) (mm)   |
|       |                |                           | 14d NOErC                                                | 3.59 mg<br>prep./L 1.1 mg<br>a.e./L) (mm)      |

| Group                                                | Test substance | Time-scale (Test type)                                                    | End point                                                                                                                     | Toxicity <sup>1</sup>                                                                                                                                            |
|------------------------------------------------------|----------------|---------------------------------------------------------------------------|-------------------------------------------------------------------------------------------------------------------------------|------------------------------------------------------------------------------------------------------------------------------------------------------------------|
|                                                      |                |                                                                           | Yield<br>14d EyC <sub>10</sub><br><br>14d EyC <sub>20</sub><br><br>14d EyC <sub>50</sub><br><br>14d NOEyC                     | 3.40 mg prep./L (1.05 mg a.e./L) (mm)<br>6.16 mg prep./L (1.89 mg a.e./L) (mm)<br>19.04 mg prep./L (5.84 mg a.e./L) (mm)<br>3.59 mg prep./L (1.1 mg a.e./L) (mm) |
| <b>Amphibians</b>                                    |                |                                                                           |                                                                                                                               |                                                                                                                                                                  |
| <i>Leptodactylus latrans</i> (tadpoles Gs 25 and 36) | glyphosate     | Acute 96 hr (static)                                                      | Mortality, LC <sub>50</sub><br><br>Development and growth (Gs 25) LOEC<br><br>Morphological abnormalities (Gs 25 and 36) LOEC | >300 mg glyphosate/L (nom)<br>15 mg glyphosate/L (nom)<br>30 mg glyphosate/L (nom)                                                                               |
| <i>Leptodactylus latrans</i> (tadpoles Gs 36)        | glyphosate     | Acute 96 hr (semi-static)                                                 | Mortality, LC <sub>50</sub><br><br>Liver effects incl. lipidosis, LOEC                                                        | >300 mg glyphosate/L (nom)<br><br>15 mg glyphosate/L (nom)                                                                                                       |
| <i>Rana pipiens</i> (tadpoles Gs 25)                 | glyphosate     | Acute 96 hr (static)                                                      | Mortality, LC <sub>50</sub>                                                                                                   | >17.9 mg a.e./L (initial measured)                                                                                                                               |
| <i>Lithobates sylvaticus</i> (tadpoles Gs 25)        | glyphosate     | Acute 96 h exposure (1 pulse, observations during ~42 days (until Gs 42)) | Mortality, SVL NOEC<br>Bw ↑ (Gs 31), LOEC (NOEC not determined)                                                               | 2.89 mg a.e./L (nom)<br><br>2.89 mg a.e./L (nom)                                                                                                                 |
| <i>Lithobates sylvaticus</i> (tadpoles Gs 25)        | glyphosate     | Acute 96 h exposure (2 pulses, 2 weeks)                                   | SVL↓<br>Condition factor↑ (at Gs 36-38)<br>LOEC                                                                               |                                                                                                                                                                  |

| Group                                                                                                                                                                                                                                                                                                                                                                                                                                                                                                                                                                                                                                                                                                                                                                                                    | Test substance | Time-scale (Test type)                              | End point             | Toxicity <sup>1</sup>                     |
|----------------------------------------------------------------------------------------------------------------------------------------------------------------------------------------------------------------------------------------------------------------------------------------------------------------------------------------------------------------------------------------------------------------------------------------------------------------------------------------------------------------------------------------------------------------------------------------------------------------------------------------------------------------------------------------------------------------------------------------------------------------------------------------------------------|----------------|-----------------------------------------------------|-----------------------|-------------------------------------------|
|                                                                                                                                                                                                                                                                                                                                                                                                                                                                                                                                                                                                                                                                                                                                                                                                          |                | apart), observations during ~42 days (until Gs 42)) | (NOEC not determined) | 2.89 mg a.e./L <sub>(nom)</sub>           |
| <i>Xenopus laevis</i> (tadpoles Gs 46)                                                                                                                                                                                                                                                                                                                                                                                                                                                                                                                                                                                                                                                                                                                                                                   | glyphosate     | Acute 96 h (semi-static, 24 h interval)             | Body length, NOEC     | 403 mg glyphosate/L <sub>(measured)</sub> |
| Further testing on aquatic organisms<br>None                                                                                                                                                                                                                                                                                                                                                                                                                                                                                                                                                                                                                                                                                                                                                             |                |                                                     |                       |                                           |
| <p>Potential endocrine disrupting properties (Annex Part A, point 8.2.3)</p> <p>For wild mammals, the same conclusion as drawn for humans applies (ED criteria not met).</p> <p>A number of studies with different taxa and species were available, including among others an amphibian metamorphosis assay (AMA) and a Fish Short-Term Reproduction Assay (FSTRA). Many <i>in vivo</i> mechanistic, EATS-mediated and ‘sensitive to but not diagnostic’ parameters were measured in the available studies.</p> <p>Overall, no convincing pattern of EATS-mediated adversity and/or endocrine activity was observed. Therefore, glyphosate does not meet the ED criteria as laid down in point 3.8.2 of Annex II to Regulation (EC) No 1107/2009, as amended by Commission Regulation (EU) 2018/605.</p> |                |                                                     |                       |                                           |

<sup>1</sup> (nom) nominal concentration; (mm) arithmetic mean measured concentration; (gmm) geometric mean measured concentration; (im) initial measured concentration; prep.: preparation; a.e.: acid equivalent

\* Valid and reliable with restriction (analytical report not available, suitability of the methods could not be checked)

1) Study is considered valid with restriction due to effect of low pH at the highest tested concentrations

2) The study was considered to be “supportive” by the RMS, due to the level of detail used in reporting the results. EFSA nonetheless considered the levels of detail enough for considering the endpoint as “reliable with restrictions”. The divergence of views has no impact on the risk assessment.

3) A large spacing factor was used in the study. Significant effects were observed at the next higher concentration (40 mg a.e./L, 33-35% effect). Thus, the endpoint of 12.5 mg/L selected for chronic effects to aquatic invertebrates (from a standard test with *Daphnia magna*) should also be protective of the effects observed in this study, despite this provided a slightly lower NOEC (10 mg/L).

4) The observed effect was not dose-related and the maximum magnitude was still very low: about 4% of body weight gain. This is not considered to have effects at the population level.

5) The observed effect was very low: about 2% of body weight gain. This is not considered to have effects at the population level.

6) A very low incidence of morphological abnormalities was seen. This is not considered to have effects at the population level

7) The stage studied in the publication is only “final instar larvae” (no measurement up to emergence). The influence of such parameter on actual emergence is unknown, and thus its influence at the population level.

### Toxicity endpoints for aquatic organisms obtained with formulations other than the representative one, but considered relevant for the representative formulation.

| Group              | Test Substance    | Time scale      | Endpoint                                                 | Toxicity                               |
|--------------------|-------------------|-----------------|----------------------------------------------------------|----------------------------------------|
| <i>Danio rerio</i> | Roundup GC Liquid | Chronic 21 days | Embryo mortality, EC <sub>10</sub> (visually determined) | > 12.8 mg glyphosate acid equivalent/L |

|  |  |  |                                                |                                                                                                                                                                                   |
|--|--|--|------------------------------------------------|-----------------------------------------------------------------------------------------------------------------------------------------------------------------------------------|
|  |  |  | Hatching success (54 hpf),<br>NOEC<br><br>LOEC | 0.44 mg glyphosate acid equivalent/L (close to 0% effects, visually determined)<br><br>12.8 mg glyphosate acid equivalent/L (about 35% increase in hatching, visually determined) |
|--|--|--|------------------------------------------------|-----------------------------------------------------------------------------------------------------------------------------------------------------------------------------------|

**Bioconcentration in fish (Annex Part A, point 8.2.2.3)**

|                                                                                              | Active substance                       | AMPA                                   | HMPA                                   |
|----------------------------------------------------------------------------------------------|----------------------------------------|----------------------------------------|----------------------------------------|
| logP <sub>O/w</sub>                                                                          | -6.28<br>at 25 °C (at pH buffers at 7) | -4.71<br>at 25 °C (at pH buffers at 7) | ≤-3.2<br>at 22 °C (at pH buffers at 7) |
| Steady-state bioconcentration factor (BCF) (total wet weight/normalised to 5% lipid content) | No BCF validated*<br>**                | N/A                                    | N/A                                    |
| Uptake/depuration kinetics BCF (total wet weight/normalised to 5% lipid content)             |                                        |                                        |                                        |
| Annex VI Trigger for the bioconcentration factor                                             |                                        |                                        |                                        |
| Clearance time (days) (CT <sub>50</sub> )                                                    |                                        |                                        |                                        |
| (CT <sub>90</sub> )                                                                          |                                        |                                        |                                        |
| Level and nature of residues (%) in organisms after the 14 day depuration phase              |                                        |                                        |                                        |
| Higher tier study                                                                            |                                        |                                        |                                        |

\* based on total <sup>14</sup>C or on specific compounds

\*\* A BCF study was not triggered in view of the low logPow (<3). Studies conducted with bluegill sunfish were available, but reliable BCF values could not be derived. The studies do however provide evidence that the potential for bioaccumulation of glyphosate is low.

**Toxicity/exposure ratios for the most sensitive aquatic organisms (Regulation (EU) N° 284/2013, Annex Part A, point 10.2)**

The PEC/RAC presented below is sufficient to conclude on the risk to aquatic macrophytes due to exposure via surface water. Nonetheless, exposure to emerged parts via contact due to spray drift is not addressed in the risk assessment illustrated in the following tables. Such an assessment could not be finalized in lack of a reliable endpoint for glyphosate and MON 52276.

**Aquatic organisms: acceptability of risk (PEC/RAC < 1) for Glyphosate for each organism group based on FOCUS Steps 1, 2 and 3 calculations for the use of MON 52276 in vegetables, root (1 × 540 g a.s./ha). Uses 3 a –b.**

| Group           |                              | Fish acute                 | Fish prolonged           | Inverteb. acute                          | Inverteb. prolonged  | Algae                       | Aquatic macrophytes                     |                                | Sed. dwell. prolonged      |
|-----------------|------------------------------|----------------------------|--------------------------|------------------------------------------|----------------------|-----------------------------|-----------------------------------------|--------------------------------|----------------------------|
| Test species    |                              | <i>Lepomis macrochirus</i> | <i>Brachydanio rerio</i> | <i>Crassostrea gigas / Daphnia magna</i> | <i>Daphnia magna</i> | <i>Skeletonema costatum</i> | <i>Myriophyllum aquaticum</i>           |                                | <i>Chironomus riparius</i> |
| Endpoint (µg/L) |                              | LC <sub>50</sub><br>32000  | NOEC<br>1000             | EC <sub>50</sub><br>40000                | NOEC<br>12500        | ErC <sub>50</sub><br>13500  | E <sub>r</sub> C <sub>50</sub><br>10330 | Endpoint (µg/kg)               | NOEC<br>154000             |
| AF              |                              | 100                        | 10                       | 100                                      | 10                   | 10                          | 10                                      | AF                             | 10                         |
| RAC (µg/L)      |                              | 320                        | 100                      | 400                                      | 1250                 | 1350                        | 1033                                    | RAC (µg/kg)                    | 15400                      |
| FOCUS Scenario  | PEC <sub>sw,max</sub> (µg/L) |                            |                          |                                          |                      |                             |                                         | PEC <sub>sed,max</sub> (µg/kg) |                            |
| <b>Step 1</b>   |                              |                            |                          |                                          |                      |                             |                                         |                                |                            |
|                 | 31.447                       | 0.098                      | 0.314                    | 0.079                                    | 0.025                | 0.023                       | 0.030                                   | 1180                           | 0.077                      |
| <b>Step 2</b>   |                              |                            |                          |                                          |                      |                             |                                         |                                |                            |
| N-Europe        | 14.041                       | 0.044                      | 0.140                    | 0.035                                    | 0.011                | 0.010                       | 0.014                                   | 594.700                        | 0.039                      |
| S-Europe        | 11.438                       | 0.036                      | 0.114                    | 0.029                                    | 0.009                | 0.008                       | 0.011                                   | 481.526                        | 0.031                      |
| <b>Step 3</b>   |                              |                            |                          |                                          |                      |                             |                                         |                                |                            |
| D3/ditch        | 3.359                        | 0.010                      | 0.034                    | 0.008                                    | 0.003                | 0.002                       | 0.003                                   | 3.117                          | 0.000                      |
| D6/ditch        | 3.368                        | 0.011                      | 0.034                    | 0.008                                    | 0.003                | 0.002                       | 0.003                                   | 5.266                          | 0.000                      |

**Aquatic organisms: acceptability of risk (PEC/RAC < 1) for Glyphosate for each organism group based on FOCUS Steps 1, 2 and 3 calculations for the use of MON 52276 in vegetables, root (1 × 540 g a.s./ha). Uses 3 a –b.**

| Group                     |       | Fish acute                 | Fish prolonged           | Inverteb. acute                          | Inverteb. prolonged  | Algae                       | Aquatic macrophytes           |         | Sed. dwell. prolonged      |
|---------------------------|-------|----------------------------|--------------------------|------------------------------------------|----------------------|-----------------------------|-------------------------------|---------|----------------------------|
| Test species              |       | <i>Lepomis macrochirus</i> | <i>Brachydanio rerio</i> | <i>Crassostrea gigas / Daphnia magna</i> | <i>Daphnia magna</i> | <i>Skeletonema costatum</i> | <i>Myriophyllum aquaticum</i> |         | <i>Chironomus riparius</i> |
| R1/pond                   | 0.273 | 0.001                      | 0.003                    | 0.001                                    | 0.000                | 0.000                       | 0.000                         | 14.560  | 0.001                      |
| R1/stream                 | 2.212 | 0.007                      | 0.022                    | 0.006                                    | 0.002                | 0.002                       | 0.002                         | 127.100 | 0.008                      |
| R2/stream                 | 2.971 | 0.009                      | 0.030                    | 0.007                                    | 0.002                | 0.002                       | 0.003                         | 530.500 | 0.034                      |
| R2/stream 2 <sup>nd</sup> | 2.971 | 0.009                      | 0.030                    | 0.007                                    | 0.002                | 0.002                       | 0.003                         | 585.900 | 0.038                      |
| R3/stream                 | 3.126 | 0.010                      | 0.031                    | 0.008                                    | 0.003                | 0.002                       | 0.003                         | 95.670  | 0.006                      |
| R4/stream                 | 2.184 | 0.007                      | 0.022                    | 0.005                                    | 0.002                | 0.002                       | 0.002                         | 195.500 | 0.013                      |

AF: Assessment factor; PEC: Predicted environmental concentration; RAC: Regulatory acceptable concentration; PEC/RAC ratios above the relevant trigger of 1 are shown in **bold**

**Aquatic organisms: acceptability of risk (PEC/RAC < 1) for Glyphosate for each organism group based on FOCUS Steps 1, 2 and 3 calculations for the use of MON 52276 in potatoes (1 × 540 g a.s./ha). Uses 3 a –b.**

| Group           |  | Fish acute                 | Fish prolonged           | Inverteb. acute                          | Inverteb. prolonged  | Algae                       | Aquatic macrophytes                     |                  | Sed. dwell. prolonged      |
|-----------------|--|----------------------------|--------------------------|------------------------------------------|----------------------|-----------------------------|-----------------------------------------|------------------|----------------------------|
| Test species    |  | <i>Lepomis macrochirus</i> | <i>Brachydanio rerio</i> | <i>Crassostrea gigas / Daphnia magna</i> | <i>Daphnia magna</i> | <i>Skeletonema costatum</i> | <i>Myriophyllum aquaticum</i>           |                  | <i>Chironomus riparius</i> |
| Endpoint (µg/L) |  | LC <sub>50</sub><br>32000  | NOEC<br>1000             | EC <sub>50</sub><br>40000                | NOEC<br>12500        | ErC <sub>50</sub><br>13500  | E <sub>r</sub> C <sub>50</sub><br>10330 | Endpoint (µg/kg) | NOEC<br>154000             |
| AF              |  | 100                        | 10                       | 100                                      | 10                   | 10                          | 10                                      | AF               | 10                         |

**Aquatic organisms: acceptability of risk (PEC/RAC < 1) for Glyphosate for each organism group based on FOCUS Steps 1, 2 and 3 calculations for the use of MON 52276 in potatoes (1 × 540 g a.s./ha). Uses 3 a –b.**

| Group                    |                              | Fish acute                 | Fish prolonged           | Inverteb. acute                          | Inverteb. prolonged  | Algae                       | Aquatic macrophytes           |                                | Sed. dwell. prolonged      |
|--------------------------|------------------------------|----------------------------|--------------------------|------------------------------------------|----------------------|-----------------------------|-------------------------------|--------------------------------|----------------------------|
| Test species             |                              | <i>Lepomis macrochirus</i> | <i>Brachydanio rerio</i> | <i>Crassostrea gigas / Daphnia magna</i> | <i>Daphnia magna</i> | <i>Skeletonema costatum</i> | <i>Myriophyllum aquaticum</i> |                                | <i>Chironomus riparius</i> |
| RAC (µg/L)               |                              | 320                        | 100                      | 400                                      | 1250                 | 1350                        | 1033                          | RAC (µg/kg)                    | 15400                      |
| FOCUS Scenario           | PEC <sub>sw,max</sub> (µg/L) |                            |                          |                                          |                      |                             |                               | PEC <sub>sed,max</sub> (µg/kg) |                            |
| <b>Step 1</b>            |                              |                            |                          |                                          |                      |                             |                               |                                |                            |
|                          | 31.447                       | 0.098                      | 0.314                    | 0.079                                    | 0.025                | 0.023                       | 0.030                         | 1180                           | 0.077                      |
| <b>Step 2</b>            |                              |                            |                          |                                          |                      |                             |                               |                                |                            |
| N-Europe                 | 14.041                       | 0.044                      | 0.140                    | 0.035                                    | 0.011                | 0.010                       | 0.014                         | 594.700                        | 0.039                      |
| S-Europe                 | 11.438                       | 0.036                      | 0.114                    | 0.029                                    | 0.009                | 0.008                       | 0.011                         | 481.526                        | 0.031                      |
| <b>Step 3</b>            |                              |                            |                          |                                          |                      |                             |                               |                                |                            |
| D3/ditch                 | 2.767                        | 0.009                      | 0.028                    | 0.007                                    | 0.002                | 0.002                       | 0.003                         | 1.918                          | 0.000                      |
| D4/pond                  | 0.108                        | 0.000                      | 0.001                    | 0.000                                    | 0.000                | 0.000                       | 0.000                         | 1.889                          | 0.000                      |
| D4/stream                | 2.353                        | 0.007                      | 0.024                    | 0.006                                    | 0.002                | 0.002                       | 0.002                         | 0.148                          | 0.000                      |
| D6/ditch                 | 2.786                        | 0.009                      | 0.028                    | 0.007                                    | 0.002                | 0.002                       | 0.003                         | 5.842                          | 0.000                      |
| D6/ditch 2 <sup>nd</sup> | 2.794                        | 0.009                      | 0.028                    | 0.007                                    | 0.002                | 0.002                       | 0.003                         | 10.440                         | 0.001                      |
| R1/pond                  | 0.318                        | 0.001                      | 0.003                    | 0.001                                    | 0.000                | 0.000                       | 0.000                         | 17.070                         | 0.001                      |
| R1/stream                | 1.917                        | 0.006                      | 0.019                    | 0.005                                    | 0.002                | 0.001                       | 0.002                         | 147.800                        | 0.010                      |
| R2/stream                | 2.575                        | 0.008                      | 0.026                    | 0.006                                    | 0.002                | 0.002                       | 0.002                         | 619.700                        | 0.040                      |
| R3/stream                | 2.709                        | 0.008                      | 0.027                    | 0.007                                    | 0.002                | 0.002                       | 0.003                         | 292.500                        | 0.019                      |



**Aquatic organisms: acceptability of risk (PEC/RAC < 1) for Glyphosate for each organism group based on FOCUS Steps 1, 2 and 3 calculations for the use of MON 52276 in potatoes (1 × 540 g a.s./ha). Uses 3 a –b.**

| Group        |  | Fish acute                 | Fish prolonged           | Inverteb. acute                          | Inverteb. prolonged  | Algae                       | Aquatic macrophytes           |  | Sed. dwell. prolonged      |
|--------------|--|----------------------------|--------------------------|------------------------------------------|----------------------|-----------------------------|-------------------------------|--|----------------------------|
| Test species |  | <i>Lepomis macrochirus</i> | <i>Brachydanio rerio</i> | <i>Crassostrea gigas / Daphnia magna</i> | <i>Daphnia magna</i> | <i>Skeletonema costatum</i> | <i>Myriophyllum aquaticum</i> |  | <i>Chironomus riparius</i> |

AF: Assessment factor; PEC: Predicted environmental concentration; RAC: Regulatory acceptable concentration; PEC/RAC ratios above the relevant trigger of 1 are shown in **bold**

**Aquatic organisms: acceptability of risk (PEC/RAC < 1) for Glyphosate for each organism group based on FOCUS Steps 1, 2 and 3 calculations for the use of MON 52276 in vegetables, bulb (1 × 540 g a.s./ha). Uses 3 a –b.**

| Group           |                              | Fish acute                 | Fish prolonged           | Inverteb. acute                          | Inverteb. prolonged  | Algae                       | Aquatic macrophytes                     |                                | Sed. dwell. prolonged      |
|-----------------|------------------------------|----------------------------|--------------------------|------------------------------------------|----------------------|-----------------------------|-----------------------------------------|--------------------------------|----------------------------|
| Test species    |                              | <i>Lepomis macrochirus</i> | <i>Brachydanio rerio</i> | <i>Crassostrea gigas / Daphnia magna</i> | <i>Daphnia magna</i> | <i>Skeletonema costatum</i> | <i>Myriophyllum aquaticum</i>           |                                | <i>Chironomus riparius</i> |
| Endpoint (µg/L) |                              | LC <sub>50</sub><br>32000  | NOEC<br>1000             | EC <sub>50</sub><br>40000                | NOEC<br>12500        | ErC <sub>50</sub><br>13500  | E <sub>r</sub> C <sub>50</sub><br>10330 | <b>Endpoint (µg/kg)</b>        | NOEC<br>154000             |
| AF              |                              | 100                        | 10                       | 100                                      | 10                   | 10                          | 10                                      | <b>AF</b>                      | 10                         |
| RAC (µg/L)      |                              | 320                        | 100                      | 400                                      | 1250                 | 1350                        | 1033                                    | <b>RAC (µg/kg)</b>             | 15400                      |
| FOCUS Scenario  | PEC <sub>sw,max</sub> (µg/L) |                            |                          |                                          |                      |                             |                                         | PEC <sub>sed,max</sub> (µg/kg) |                            |
| <b>Step 1</b>   |                              |                            |                          |                                          |                      |                             |                                         |                                |                            |
|                 | 31.447                       | 0.098                      | 0.314                    | 0.079                                    | 0.025                | 0.023                       | 0.030                                   | 1180                           | 0.077                      |
| <b>Step 2</b>   |                              |                            |                          |                                          |                      |                             |                                         |                                |                            |
| N-Europe        | 14.041                       | 0.044                      | 0.140                    | 0.035                                    | 0.011                | 0.010                       | 0.014                                   | 594.700                        | 0.039                      |

**Aquatic organisms: acceptability of risk (PEC/RAC < 1) for Glyphosate for each organism group based on FOCUS Steps 1, 2 and 3 calculations for the use of MON 52276 in vegetables, bulb (1 × 540 g a.s./ha). Uses 3 a –b.**

| Group                       |        | Fish acute                 | Fish prolonged           | Inverteb. acute                          | Inverteb. prolonged  | Algae                       | Aquatic macrophytes           |         | Sed. dwell. prolonged      |
|-----------------------------|--------|----------------------------|--------------------------|------------------------------------------|----------------------|-----------------------------|-------------------------------|---------|----------------------------|
| Test species                |        | <i>Lepomis macrochirus</i> | <i>Brachydanio rerio</i> | <i>Crassostrea gigas / Daphnia magna</i> | <i>Daphnia magna</i> | <i>Skeletonema costatum</i> | <i>Myriophyllum aquaticum</i> |         | <i>Chironomus riparius</i> |
| S-Europe                    | 11.438 | 0.036                      | 0.114                    | 0.029                                    | 0.009                | 0.008                       | 0.011                         | 481.526 | 0.031                      |
| <b>Step 3</b>               |        |                            |                          |                                          |                      |                             |                               |         |                            |
| D3/ditch                    | 3.347  | 0.010                      | 0.033                    | 0.008                                    | 0.003                | 0.002                       | 0.003                         | 2.190   | 0.000                      |
| D4/pond                     | 0.111  | 0.000                      | 0.001                    | 0.000                                    | 0.000                | 0.000                       | 0.000                         | 1.937   | 0.000                      |
| D4/stream                   | 2.645  | 0.008                      | 0.026                    | 0.007                                    | 0.002                | 0.002                       | 0.003                         | 0.134   | 0.000                      |
| D6/ditch                    | 3.383  | 0.011                      | 0.034                    | 0.008                                    | 0.003                | 0.003                       | 0.003                         | 12.010  | 0.001                      |
| D6/ditch<br>2 <sup>nd</sup> | 3.383  | 0.011                      | 0.034                    | 0.008                                    | 0.003                | 0.003                       | 0.003                         | 12.160  | 0.001                      |
| R1/pond                     | 0.306  | 0.001                      | 0.003                    | 0.001                                    | 0.000                | 0.000                       | 0.000                         | 16.230  | 0.001                      |
| R1/stream                   | 2.212  | 0.007                      | 0.022                    | 0.006                                    | 0.002                | 0.002                       | 0.002                         | 146     | 0.009                      |
| R2/stream                   | 2.971  | 0.009                      | 0.030                    | 0.007                                    | 0.002                | 0.002                       | 0.003                         | 533.100 | 0.035                      |
| R3/stream                   | 3.125  | 0.010                      | 0.031                    | 0.008                                    | 0.003                | 0.002                       | 0.003                         | 124.400 | 0.008                      |
| R4/stream                   | 2.212  | 0.007                      | 0.022                    | 0.006                                    | 0.002                | 0.002                       | 0.002                         | 135.300 | 0.009                      |

AF: Assessment factor; PEC: Predicted environmental concentration; RAC: Regulatory acceptable concentration; PEC/RAC ratios above the relevant trigger of 1 are shown in **bold**

**Aquatic organisms: acceptability of risk (PEC/RAC < 1) for Glyphosate for each organism group based on FOCUS Steps 1, 2 and 3 calculations for the use of MON 52276 in vegetables, fruiting (1 × 540 g a.s./ha). Uses 3 a –b.**

| Group           |                              | Fish acute                 | Fish prolonged           | Inverteb. acute                          | Inverteb. prolonged  | Algae                       | Aquatic macrophytes           |                                | Sed. dwell. prolonged      |
|-----------------|------------------------------|----------------------------|--------------------------|------------------------------------------|----------------------|-----------------------------|-------------------------------|--------------------------------|----------------------------|
| Test species    |                              | <i>Lepomis macrochirus</i> | <i>Brachydanio rerio</i> | <i>Crassostrea gigas / Daphnia magna</i> | <i>Daphnia magna</i> | <i>Skeletonema costatum</i> | <i>Myriophyllum aquaticum</i> |                                | <i>Chironomus riparius</i> |
| Endpoint (µg/L) |                              | LC <sub>50</sub><br>32000  | NOEC<br>1000             | EC <sub>50</sub><br>40000                | NOEC<br>12500        | ErC <sub>50</sub><br>13500  | ErC <sub>50</sub><br>10330    | Endpoint (µg/kg)               | NOEC<br>154000             |
| AF              |                              | 100                        | 10                       | 100                                      | 10                   | 10                          | 10                            | AF                             | 10                         |
| RAC (µg/L)      |                              | 320                        | 100                      | 400                                      | 1250                 | 1350                        | 1033                          | RAC (µg/kg)                    | 15400                      |
| FOCUS Scenario  | PEC <sub>sw,max</sub> (µg/L) |                            |                          |                                          |                      |                             |                               | PEC <sub>sed,max</sub> (µg/kg) |                            |
| <b>Step 1</b>   |                              |                            |                          |                                          |                      |                             |                               |                                |                            |
|                 | 31.447                       | 0.098                      | 0.314                    | 0.079                                    | 0.025                | 0.023                       | 0.030                         | 1180                           | 0.077                      |
| <b>Step 2</b>   |                              |                            |                          |                                          |                      |                             |                               |                                |                            |
| N-Europe        | 14.041                       | 0.044                      | 0.140                    | 0.035                                    | 0.011                | 0.010                       | 0.014                         | 594.700                        | 0.039                      |
| S-Europe        | 11.438                       | 0.036                      | 0.114                    | 0.029                                    | 0.009                | 0.008                       | 0.011                         | 481.526                        | 0.031                      |
| <b>Step 3</b>   |                              |                            |                          |                                          |                      |                             |                               |                                |                            |
| D6/ditch        | 3.376                        | 0.011                      | 0.034                    | 0.008                                    | 0.003                | 0.003                       | 0.003                         | 9.061                          | 0.001                      |
| R2/stream       | 2.971                        | 0.009                      | 0.030                    | 0.007                                    | 0.002                | 0.002                       | 0.003                         | 715.300                        | 0.046                      |
| R3/stream       | 3.125                        | 0.010                      | 0.031                    | 0.008                                    | 0.003                | 0.002                       | 0.003                         | 292.500                        | 0.019                      |
| R4/stream       | 2.212                        | 0.007                      | 0.022                    | 0.006                                    | 0.002                | 0.002                       | 0.002                         | 185.300                        | 0.012                      |

AF: Assessment factor; PEC: Predicted environmental concentration; RAC: Regulatory acceptable concentration; PEC/RAC ratios above the relevant trigger of 1 are shown in **bold**

**Aquatic organisms: acceptability of risk (PEC/RAC < 1) for Glyphosate for each organism group based on FOCUS Steps 1, 2 and 3 calculations for the use of MON 52276 in vegetables, leafy (1 × 540 g a.s./ha). Uses 3 a –b.**

| Group                    |                              | Fish acute                 | Fish prolonged           | Inverteb. acute                                 | Inverteb. prolonged  | Algae                       | Aquatic macrophytes           |                                | Sed. dwell. prolonged      |
|--------------------------|------------------------------|----------------------------|--------------------------|-------------------------------------------------|----------------------|-----------------------------|-------------------------------|--------------------------------|----------------------------|
| Test species             |                              | <i>Lepomis macrochirus</i> | <i>Brachydanio rerio</i> | <i>Crassostrea gigas</i> / <i>Daphnia magna</i> | <i>Daphnia magna</i> | <i>Skeletonema costatum</i> | <i>Myriophyllum aquaticum</i> |                                | <i>Chironomus riparius</i> |
| Endpoint (µg/L)          |                              | LC <sub>50</sub><br>32000  | NOEC<br>1000             | EC <sub>50</sub><br>40000                       | NOEC<br>12500        | ErC <sub>50</sub><br>13500  | ErC <sub>50</sub><br>10330    | Endpoint (µg/kg)               | NOEC<br>154000             |
| AF                       |                              | 100                        | 10                       | 100                                             | 10                   | 10                          | 10                            | AF                             | 10                         |
| RAC (µg/L)               |                              | 320                        | 100                      | 400                                             | 1250                 | 1350                        | 1033                          | RAC (µg/kg)                    | 15400                      |
| FOCUS Scenario           | PEC <sub>sw,max</sub> (µg/L) |                            |                          |                                                 |                      |                             |                               | PEC <sub>sed,max</sub> (µg/kg) |                            |
| <b>Step 1</b>            |                              |                            |                          |                                                 |                      |                             |                               |                                |                            |
|                          | 31.447                       | 0.098                      | 0.314                    | 0.079                                           | 0.025                | 0.023                       | 0.030                         | 1180                           | 0.077                      |
| <b>Step 2</b>            |                              |                            |                          |                                                 |                      |                             |                               |                                |                            |
| N-Europe                 | 14.041                       | 0.044                      | 0.140                    | 0.035                                           | 0.011                | 0.010                       | 0.014                         | 594.700                        | 0.039                      |
| S-Europe                 | 11.438                       | 0.036                      | 0.114                    | 0.029                                           | 0.009                | 0.008                       | 0.011                         | 481.526                        | 0.031                      |
| <b>Step 3</b>            |                              |                            |                          |                                                 |                      |                             |                               |                                |                            |
| D3/ditch                 | 3.358                        | 0.010                      | 0.034                    | 0.008                                           | 0.003                | 0.002                       | 0.003                         | 3.057                          | 0.000                      |
| D3/ditch 2 <sup>nd</sup> | 3.356                        | 0.010                      | 0.034                    | 0.008                                           | 0.003                | 0.002                       | 0.003                         | 2.791                          | 0.000                      |
| D4/pond                  | 0.111                        | 0.000                      | 0.001                    | 0.000                                           | 0.000                | 0.000                       | 0.000                         | 1.944                          | 0.000                      |
| D4/stream                | 2.698                        | 0.008                      | 0.027                    | 0.007                                           | 0.002                | 0.002                       | 0.003                         | 0.159                          | 0.000                      |
| D6/ditch                 | 3.383                        | 0.011                      | 0.034                    | 0.008                                           | 0.003                | 0.003                       | 0.003                         | 12.530                         | 0.001                      |
| R1/pond                  | 0.254                        | 0.001                      | 0.003                    | 0.001                                           | 0.000                | 0.000                       | 0.000                         | 16.420                         | 0.001                      |

**Aquatic organisms: acceptability of risk (PEC/RAC < 1) for Glyphosate for each organism group based on FOCUS Steps 1, 2 and 3 calculations for the use of MON 52276 in vegetables, leafy (1 × 540 g a.s./ha). Uses 3 a –b.**

| Group                        |       | Fish acute                 | Fish prolonged           | Inverteb. acute                          | Inverteb. prolonged  | Algae                       | Aquatic macrophytes           |         | Sed. dwell. prolonged      |
|------------------------------|-------|----------------------------|--------------------------|------------------------------------------|----------------------|-----------------------------|-------------------------------|---------|----------------------------|
| Test species                 |       | <i>Lepomis macrochirus</i> | <i>Brachydanio rerio</i> | <i>Crassostrea gigas / Daphnia magna</i> | <i>Daphnia magna</i> | <i>Skeletonema costatum</i> | <i>Myriophyllum aquaticum</i> |         | <i>Chironomus riparius</i> |
| R1/pond<br>2 <sup>nd</sup>   | 0.398 | 0.001                      | 0.004                    | 0.001                                    | 0.000                | 0.000                       | 0.000                         | 20.180  | 0.001                      |
| R1/stream                    | 2.211 | 0.007                      | 0.022                    | 0.006                                    | 0.002                | 0.002                       | 0.002                         | 180.800 | 0.012                      |
| R1/stream<br>2 <sup>nd</sup> | 2.210 | 0.007                      | 0.022                    | 0.006                                    | 0.002                | 0.002                       | 0.002                         | 334.600 | 0.022                      |
| R2/stream                    | 2.971 | 0.009                      | 0.030                    | 0.007                                    | 0.002                | 0.002                       | 0.003                         | 568.200 | 0.037                      |
| R2/stream<br>2 <sup>nd</sup> | 2.971 | 0.009                      | 0.030                    | 0.007                                    | 0.002                | 0.002                       | 0.003                         | 630.200 | 0.041                      |
| R3/stream                    | 3.125 | 0.010                      | 0.031                    | 0.008                                    | 0.003                | 0.002                       | 0.003                         | 413.100 | 0.027                      |
| R3/stream<br>2 <sup>nd</sup> | 3.125 | 0.010                      | 0.031                    | 0.008                                    | 0.003                | 0.002                       | 0.003                         | 292.500 | 0.019                      |
| R4/stream                    | 2.212 | 0.007                      | 0.022                    | 0.006                                    | 0.002                | 0.002                       | 0.002                         | 214.300 | 0.014                      |
| R4/stream<br>2 <sup>nd</sup> | 2.212 | 0.007                      | 0.022                    | 0.006                                    | 0.002                | 0.002                       | 0.002                         | 294.500 | 0.019                      |

AF: Assessment factor; PEC: Predicted environmental concentration; RAC: Regulatory acceptable concentration; PEC/RAC ratios above the relevant trigger of 1 are shown in **bold**

**Aquatic organisms: acceptability of risk (PEC/RAC < 1) for Glyphosate for each organism group based on FOCUS Steps 1, 2 and 3 calculations for the use of MON 52276 in sugar beets (1 × 540 g a.s./ha). Uses 3 a-b.**

| Group           |                              | Fish acute                 | Fish prolonged           | Inverteb. acute                          | Inverteb. prolonged  | Algae                       | Aquatic macrophytes           |                                | Sed. dwell. prolonged      |
|-----------------|------------------------------|----------------------------|--------------------------|------------------------------------------|----------------------|-----------------------------|-------------------------------|--------------------------------|----------------------------|
| Test species    |                              | <i>Lepomis macrochirus</i> | <i>Brachydanio rerio</i> | <i>Crassostrea gigas / Daphnia magna</i> | <i>Daphnia magna</i> | <i>Skeletonema costatum</i> | <i>Myriophyllum aquaticum</i> |                                | <i>Chironomus riparius</i> |
| Endpoint (µg/L) |                              | LC <sub>50</sub><br>32000  | NOEC<br>1000             | EC <sub>50</sub><br>40000                | NOEC<br>12500        | ErC <sub>50</sub><br>13500  | ErC <sub>50</sub><br>10330    | Endpoint (µg/kg)               | NOEC<br>154000             |
| AF              |                              | 100                        | 10                       | 100                                      | 10                   | 10                          | 10                            | AF                             | 10                         |
| RAC (µg/L)      |                              | 320                        | 100                      | 400                                      | 1250                 | 1350                        | 1033                          | RAC (µg/kg)                    | 15400                      |
| FOCUS Scenario  | PEC <sub>sw,max</sub> (µg/L) |                            |                          |                                          |                      |                             |                               | PEC <sub>sed,max</sub> (µg/kg) |                            |
| <b>Step 1</b>   |                              |                            |                          |                                          |                      |                             |                               |                                |                            |
|                 | 31.447                       | 0.098                      | 0.314                    | 0.079                                    | 0.025                | 0.023                       | 0.030                         | 1180                           | 0.077                      |
| <b>Step 2</b>   |                              |                            |                          |                                          |                      |                             |                               |                                |                            |
| N-Europe        | 14.041                       | 0.044                      | 0.140                    | 0.035                                    | 0.011                | 0.010                       | 0.014                         | 594.700                        | 0.039                      |
| S-Europe        | 11.438                       | 0.036                      | 0.114                    | 0.029                                    | 0.009                | 0.008                       | 0.011                         | 481.526                        | 0.031                      |
| <b>Step 3</b>   |                              |                            |                          |                                          |                      |                             |                               |                                |                            |
| D3/ditch        | 2.767                        | 0.009                      | 0.028                    | 0.007                                    | 0.002                | 0.002                       | 0.003                         | 1.902                          | 0.000                      |
| D4/pond         | 0.108                        | 0.000                      | 0.001                    | 0.000                                    | 0.000                | 0.000                       | 0.000                         | 1.851                          | 0.000                      |
| D4/stream       | 2.425                        | 0.008                      | 0.024                    | 0.006                                    | 0.002                | 0.002                       | 0.002                         | 0.234                          | 0.000                      |
| R1/pond         | 0.326                        | 0.001                      | 0.003                    | 0.001                                    | 0.000                | 0.000                       | 0.000                         | 16.200                         | 0.001                      |
| R1/stream       | 1.917                        | 0.006                      | 0.019                    | 0.005                                    | 0.002                | 0.001                       | 0.002                         | 164.300                        | 0.011                      |
| R3/stream       | 2.709                        | 0.008                      | 0.027                    | 0.007                                    | 0.002                | 0.002                       | 0.003                         | 292.500                        | 0.019                      |

**Aquatic organisms: acceptability of risk (PEC/RAC < 1) for Glyphosate for each organism group based on FOCUS Steps 1, 2 and 3 calculations for the use of MON 52276 in sugar beets (1 × 540 g a.s./ha). Uses 3 a-b.**

| Group        |  | Fish acute                 | Fish prolonged           | Inverteb. acute                          | Inverteb. prolonged  | Algae                       | Aquatic macrophytes           |  | Sed. dwell. prolonged      |
|--------------|--|----------------------------|--------------------------|------------------------------------------|----------------------|-----------------------------|-------------------------------|--|----------------------------|
| Test species |  | <i>Lepomis macrochirus</i> | <i>Brachydanio rerio</i> | <i>Crassostrea gigas / Daphnia magna</i> | <i>Daphnia magna</i> | <i>Skeletonema costatum</i> | <i>Myriophyllum aquaticum</i> |  | <i>Chironomus riparius</i> |

AF: Assessment factor; PEC: Predicted environmental concentration; RAC: Regulatory acceptable concentration; PEC/RAC ratios above the relevant trigger of 1 are shown in **bold**

**Aquatic organisms: acceptability of risk (PEC/RAC < 1) for AMPA for each organism group based on FOCUS Steps 1, 2 and 3 calculations for the use of MON 52276 in field crops<sup>1</sup> (1 × 540 g a.s./ha). Uses 3 a-b.**

| Group                                            |                              | Fish acute                 | Fish prolonged             | Inverteb. acute            | Inverteb. prolonged  | Algae                                   | Aquatic macrophytes                     |                                | Sed. dwell. prolonged      |
|--------------------------------------------------|------------------------------|----------------------------|----------------------------|----------------------------|----------------------|-----------------------------------------|-----------------------------------------|--------------------------------|----------------------------|
| Test species                                     |                              | <i>Oncorhynchus mykiss</i> | <i>Pimephales promelas</i> | <i>Daphnia magna</i>       | <i>Daphnia magna</i> | <i>Pseudokirchneriella subcapitata</i>  | <i>Myriophyllum aquaticum</i>           |                                | <i>Chironomus riparius</i> |
| Endpoint (µg/L)                                  |                              | LC <sub>50</sub><br>100000 | NOEC<br>12000              | EC <sub>50</sub><br>690000 | NOEC<br>15000        | E <sub>r</sub> C <sub>50</sub><br>31900 | E <sub>r</sub> C <sub>50</sub><br>72000 | Endpoint (µg/kg)               | NOEC<br>786500             |
| AF                                               |                              | 100                        | 10                         | 100                        | 10                   | 10                                      | 10                                      | AF                             | 10                         |
| RAC (µg/L)                                       |                              | 1000                       | 1200                       | 6900                       | 1500                 | 3190                                    | 7200                                    | RAC (µg/kg)                    | 78650                      |
| FOCUS Scenario                                   | PEC <sub>sw,max</sub> (µg/L) |                            |                            |                            |                      |                                         |                                         | PEC <sub>sed,max</sub> (µg/kg) |                            |
| <b>Step 1 (DT<sub>50</sub> wat/sed = 89.9 d)</b> |                              |                            |                            |                            |                      |                                         |                                         |                                |                            |
|                                                  | 25.123                       | 0.025                      | 0.021                      | 0.004                      | 0.017                | 0.008                                   | 0.003                                   | 616.340                        | 0.008                      |
| <b>Step 2 (DT<sub>50</sub> wat/sed = 89.9 d)</b> |                              |                            |                            |                            |                      |                                         |                                         |                                |                            |
| N-Europe                                         | 12.301                       | 0.012                      | 0.010                      | 0.002                      | 0.008                | 0.004                                   | 0.002                                   | 310.273                        | 0.004                      |
| S-Europe                                         | 9.894                        | 0.010                      | 0.008                      | 0.001                      | 0.007                | 0.003                                   | 0.001                                   | 249.102                        | 0.003                      |

**Aquatic organisms: acceptability of risk (PEC/RAC < 1) for AMPA for each organism group based on FOCUS Steps 1, 2 and 3 calculations for the use of MON 52276 in field crops<sup>1</sup> (1 × 540 g a.s./ha). Uses 3 a-b.**

| Group        |  | Fish acute                 | Fish prolonged             | Inverteb. acute      | Inverteb. prolonged  | Algae                                  | Aquatic macrophytes           |  | Sed. dwell. prolonged      |
|--------------|--|----------------------------|----------------------------|----------------------|----------------------|----------------------------------------|-------------------------------|--|----------------------------|
| Test species |  | <i>Oncorhynchus mykiss</i> | <i>Pimephales promelas</i> | <i>Daphnia magna</i> | <i>Daphnia magna</i> | <i>Pseudokirchneriella subcapitata</i> | <i>Myriophyllum aquaticum</i> |  | <i>Chironomus riparius</i> |

AF: Assessment factor; PEC: Predicted environmental concentration; RAC: Regulatory acceptable concentration; PEC/RAC ratios above the relevant trigger of 1 are shown in **bold**

<sup>1</sup> covering all corresponding uses in root vegetables, potatoes, bulb vegetables, fruiting vegetables, leafy vegetables and sugar beets

**Aquatic organisms: acceptability of risk (PEC/RAC < 1) for HMPA for each organism group based on FOCUS Steps 1, 2 and 3 calculations for the use of MON 52276 in field crops<sup>1</sup> (1 × 540 g a.s./ha). Uses 3 a-b.**

| Group           |                              | Fish acute                | Inverteb. acute            | Algae                                    | Aquatic macrophytes                      |                                | Sed. dwell. prolonged                   |
|-----------------|------------------------------|---------------------------|----------------------------|------------------------------------------|------------------------------------------|--------------------------------|-----------------------------------------|
| Test species    |                              | -                         | <i>Daphnia magna</i>       | <i>Pseudokirchneriella subcapitata</i>   | <i>Lemna gibba</i>                       |                                | <i>Chironomus riparius</i> <sup>§</sup> |
| Endpoint (µg/L) |                              | LC <sub>50</sub><br>32000 | EC <sub>50</sub><br>100000 | E <sub>r</sub> C <sub>50</sub><br>120000 | E <sub>r</sub> C <sub>50</sub><br>123000 | Endpoint (µg/kg)               | NOEC<br>15400 µg/kg sed.                |
| AF              |                              | 100                       | 100                        | 10                                       | 10                                       | AF                             | 10                                      |
| RAC (µg/L)      |                              | 320                       | 1000                       | 12000                                    | 12300                                    | RAC (µg/kg)                    | 1540 µg/kg sed.                         |
| FOCUS Scenario  | PEC <sub>sw,max</sub> (µg/L) |                           |                            |                                          |                                          | PEC <sub>sed,max</sub> (µg/kg) |                                         |
| <b>Step 1</b>   |                              |                           |                            |                                          |                                          |                                |                                         |
|                 | 12.096                       | 0.038                     | 0.012                      | 0.001                                    | <0.001                                   | 85.43                          | 0.055                                   |
| <b>Step 2</b>   |                              |                           |                            |                                          |                                          |                                |                                         |
| N-Europe        | 6.108                        | 0.019                     | 0.006                      | <0.001                                   | <0.001                                   | 43.15                          | 0.028                                   |
| S-Europe        | 4.952                        | 0.015                     | 0.005                      | <0.001                                   | <0.001                                   | 34.97                          | 0.023                                   |



**Aquatic organisms: acceptability of risk (PEC/RAC < 1) for HMPA for each organism group based on FOCUS Steps 1, 2 and 3 calculations for the use of MON 52276 in field crops<sup>1</sup> (1 × 540 g a.s./ha). Uses 3 a-b.**

| Group        |  | Fish acute | Inverteb. acute      | Algae                                  | Aquatic macrophytes |  | Sed. dwell. prolonged                   |
|--------------|--|------------|----------------------|----------------------------------------|---------------------|--|-----------------------------------------|
| Test species |  | -          | <i>Daphnia magna</i> | <i>Pseudokirchneriella subcapitata</i> | <i>Lemna gibba</i>  |  | <i>Chironomus riparius</i> <sup>§</sup> |

AF: Assessment factor; PEC: Predicted environmental concentration; RAC: Regulatory acceptable concentration; PEC/RAC ratios above the relevant trigger of 1 are shown in **bold**

<sup>1</sup> covering all corresponding uses in root vegetables, potatoes, bulb vegetables, fruiting vegetables, leafy vegetables and sugar beets

<sup>§</sup> added following open point of section 4 (expert consultation 4.2): “RMS to update the PEC sediment calculations for HMPA using a default Koc value of 10000 mL/g and to include the metabolite HMPA in the residue definition for sediment in both an update to the RAR and the list of endpoints.” As worst case the metabolite was considered 10 times more toxic than glyphosate.

**Aquatic organisms: acceptability of risk (PEC/RAC < 1) for P1a and M3.3 for sediment dwellers based on FOCUS Steps 1, 2 and 3 calculations for the use of MON 52276 in field crops<sup>1</sup> (1 × 540 g a.s./ha). Uses 3 a-b.**

| Group           | Sed. dwell. prolonged          |                            |
|-----------------|--------------------------------|----------------------------|
| Test species    |                                | <i>Chironomus riparius</i> |
| Endpoint (µg/L) |                                | NOEC*<br>78650             |
| AF              |                                | 10                         |
| RAC (µg/L)      |                                | 7865                       |
| FOCUS Scenario  | PEC <sub>sed,max</sub> (µg/kg) |                            |
| <b>Step 1</b>   |                                |                            |
|                 | 137.269                        | 0.017                      |
| <b>Step 2</b>   |                                |                            |
| N-Europe        | 69.327                         | 0.009                      |
| S-Europe        | 56.197                         | 0.007                      |

**Aquatic organisms: acceptability of risk (PEC/RAC < 1) for P1a and M3.3 for sediment dwellers based on FOCUS Steps 1, 2 and 3 calculations for the use of MON 52276 in field crops<sup>1</sup> (1 × 540 g a.s./ha). Uses 3 a-b.**

|                     |                              |                            |
|---------------------|------------------------------|----------------------------|
| <b>Group</b>        | <b>Sed. dwell. prolonged</b> |                            |
| <b>Test species</b> |                              | <i>Chironomus riparius</i> |

AF: Assessment factor; PEC: Predicted environmental concentration; RAC: Regulatory acceptable concentration; PEC/RAC ratios above the relevant trigger of 1 are shown in **bold**

<sup>1</sup> covering all corresponding uses in root vegetables, potatoes, bulb vegetables, fruiting vegetables, leafy vegetables and sugar beets

\* considered ten times more toxic than AMPA

**Aquatic organisms: acceptability of risk (PEC/RAC < 1) for Glyphosate for each organism group based on FOCUS Steps 1, 2 and 3 calculations for the use of MON 52276 in vegetables, root (3 × 720 g a.s./ha, with application interval of 28 days). Uses 2 a-c.**

| Group                    |                              | Fish acute                 | Fish prolonged           | Inverteb. acute                          | Inverteb. prolonged  | Algae                       | Aquatic macrophytes           |                                | Sed. dwell. prolonged      |
|--------------------------|------------------------------|----------------------------|--------------------------|------------------------------------------|----------------------|-----------------------------|-------------------------------|--------------------------------|----------------------------|
| Test species             |                              | <i>Lepomis macrochirus</i> | <i>Brachydanio rerio</i> | <i>Crassostrea gigas / Daphnia magna</i> | <i>Daphnia magna</i> | <i>Skeletonema costatum</i> | <i>Myriophyllum aquaticum</i> |                                | <i>Chironomus riparius</i> |
| Endpoint (µg/L)          |                              | LC <sub>50</sub><br>32000  | NOEC<br>1000             | EC <sub>50</sub><br>40000                | NOEC<br>12500        | ErC <sub>50</sub><br>13500  | ErC <sub>50</sub><br>10330    | Endpoint (µg/kg)               | NOEC<br>154000             |
| AF                       |                              | 100                        | 10                       | 100                                      | 10                   | 10                          | 10                            | AF                             | 10                         |
| RAC (µg/L)               |                              | 320                        | 100                      | 400                                      | 1250                 | 1350                        | 1033                          | RAC (µg/kg)                    | 15400                      |
| FOCUS Scenario           | PEC <sub>sw,max</sub> (µg/L) |                            |                          |                                          |                      |                             |                               | PEC <sub>sed,max</sub> (µg/kg) |                            |
| <b>Step 1</b>            |                              |                            |                          |                                          |                      |                             |                               |                                |                            |
|                          | 125.789                      | 0.393                      | <b>1.258</b>             | 0.314                                    | 0.101                | 0.093                       | 0.122                         | 4710                           | 0.306                      |
| <b>Step 2</b>            |                              |                            |                          |                                          |                      |                             |                               |                                |                            |
| N-Europe                 | 48.975                       | 0.153                      | 0.490                    | 0.122                                    | 0.039                | 0.036                       | 0.047                         | 2090                           | 0.136                      |
| S-Europe                 | 39.701                       | 0.124                      | 0.397                    | 0.099                                    | 0.032                | 0.029                       | 0.038                         | 1690                           | 0.110                      |
| <b>Step 3</b>            |                              |                            |                          |                                          |                      |                             |                               |                                |                            |
| D3/ditch                 | 4.487                        | 0.014                      | 0.045                    | 0.011                                    | 0.004                | 0.003                       | 0.004                         | 4.984                          | 0.000                      |
| D6/ditch                 | 4.498                        | 0.014                      | 0.045                    | 0.011                                    | 0.004                | 0.003                       | 0.004                         | 22.470                         | 0.001                      |
| R1/pond                  | 1.921                        | 0.006                      | 0.019                    | 0.005                                    | 0.002                | 0.001                       | 0.002                         | 70.280                         | 0.005                      |
| R1/stream                | 4.091                        | 0.013                      | 0.041                    | 0.010                                    | 0.003                | 0.003                       | 0.004                         | 417.900                        | 0.027                      |
| R2/stream                | 3.969                        | 0.012                      | 0.040                    | 0.010                                    | 0.003                | 0.003                       | 0.004                         | 1953.500                       | 0.127                      |
| R2/stream <sub>2nd</sub> | 3.969                        | 0.012                      | 0.040                    | 0.010                                    | 0.003                | 0.003                       | 0.004                         | 2133.100                       | 0.139                      |

**Aquatic organisms: acceptability of risk (PEC/RAC < 1) for Glyphosate for each organism group based on FOCUS Steps 1, 2 and 3 calculations for the use of MON 52276 in vegetables, root (3 × 720 g a.s./ha, with application interval of 28 days). Uses 2 a-c.**

| Group        |       | Fish acute                 | Fish prolonged           | Inverteb. acute                          | Inverteb. prolonged  | Algae                       | Aquatic macrophytes           |         | Sed. dwell. prolonged      |
|--------------|-------|----------------------------|--------------------------|------------------------------------------|----------------------|-----------------------------|-------------------------------|---------|----------------------------|
| Test species |       | <i>Lepomis macrochirus</i> | <i>Brachydanio rerio</i> | <i>Crassostrea gigas / Daphnia magna</i> | <i>Daphnia magna</i> | <i>Skeletonema costatum</i> | <i>Myriophyllum aquaticum</i> |         | <i>Chironomus riparius</i> |
| R3/stream    | 4.175 | 0.013                      | 0.042                    | 0.010                                    | 0.003                | 0.003                       | 0.004                         | 398.300 | 0.026                      |
| R4/stream    | 5.530 | 0.017                      | 0.055                    | 0.014                                    | 0.004                | 0.004                       | 0.005                         | 696.400 | 0.045                      |

AF: Assessment factor; PEC: Predicted environmental concentration; RAC: Regulatory acceptable concentration; PEC/RAC ratios above the relevant trigger of 1 are shown in **bold**

**Aquatic organisms: acceptability of risk (PEC/RAC < 1) for Glyphosate for each organism group based on FOCUS Steps 1, 2 and 3 calculations for the use of MON 52276 in potatoes (3 × 720 g a.s./ha, with application interval of 28 days). Uses 2 a-c.**

| Group           |                              | Fish acute                 | Fish prolonged           | Inverteb. acute                          | Inverteb. prolonged  | Algae                       | Aquatic macrophytes           |                                | Sed. dwell. prolonged      |
|-----------------|------------------------------|----------------------------|--------------------------|------------------------------------------|----------------------|-----------------------------|-------------------------------|--------------------------------|----------------------------|
| Test species    |                              | <i>Lepomis macrochirus</i> | <i>Brachydanio rerio</i> | <i>Crassostrea gigas / Daphnia magna</i> | <i>Daphnia magna</i> | <i>Skeletonema costatum</i> | <i>Myriophyllum aquaticum</i> |                                | <i>Chironomus riparius</i> |
| Endpoint (µg/L) |                              | LC <sub>50</sub><br>32000  | NOEC<br>1000             | EC <sub>50</sub><br>40000                | NOEC<br>12500        | ErC <sub>50</sub><br>13500  | ErC <sub>50</sub><br>10330    | Endpoint (µg/kg)               | NOEC<br>154000             |
| AF              |                              | 100                        | 10                       | 100                                      | 10                   | 10                          | 10                            | AF                             | 10                         |
| RAC (µg/L)      |                              | 320                        | 100                      | 400                                      | 1250                 | 1350                        | 1033                          | RAC (µg/kg)                    | 15400                      |
| FOCUS Scenario  | PEC <sub>sw,max</sub> (µg/L) |                            |                          |                                          |                      |                             |                               | PEC <sub>sed,max</sub> (µg/kg) |                            |
| <b>Step 1</b>   |                              |                            |                          |                                          |                      |                             |                               |                                |                            |
|                 | 125.789                      | 0.393                      | <b>1.258</b>             | 0.314                                    | 0.101                | 0.093                       | 0.122                         | 4710                           | 0.306                      |

**Aquatic organisms: acceptability of risk (PEC/RAC < 1) for Glyphosate for each organism group based on FOCUS Steps 1, 2 and 3 calculations for the use of MON 52276 in potatoes (3 × 720 g a.s./ha, with application interval of 28 days). Uses 2 a-c.**

| Group                       |        | Fish acute                 | Fish prolonged           | Inverteb. acute                                 | Inverteb. prolonged  | Algae                       | Aquatic macrophytes           |          | Sed. dwell. prolonged      |
|-----------------------------|--------|----------------------------|--------------------------|-------------------------------------------------|----------------------|-----------------------------|-------------------------------|----------|----------------------------|
| Test species                |        | <i>Lepomis macrochirus</i> | <i>Brachydanio rerio</i> | <i>Crassostrea gigas</i> / <i>Daphnia magna</i> | <i>Daphnia magna</i> | <i>Skeletonema costatum</i> | <i>Myriophyllum aquaticum</i> |          | <i>Chironomus riparius</i> |
| <b>Step 2</b>               |        |                            |                          |                                                 |                      |                             |                               |          |                            |
| N-Europe                    | 48.975 | 0.153                      | 0.490                    | 0.122                                           | 0.039                | 0.036                       | 0.047                         | 2090     | 0.136                      |
| S-Europe                    | 39.701 | 0.124                      | 0.397                    | 0.099                                           | 0.032                | 0.029                       | 0.038                         | 1690     | 0.110                      |
| <b>Step 3</b>               |        |                            |                          |                                                 |                      |                             |                               |          |                            |
| D3/ditch                    | 3.696  | 0.012                      | 0.037                    | 0.009                                           | 0.003                | 0.003                       | 0.004                         | 3.925    | 0.000                      |
| D4/pond                     | 0.190  | 0.001                      | 0.002                    | 0.000                                           | 0.000                | 0.000                       | 0.000                         | 5.638    | 0.000                      |
| D4/stream                   | 3.144  | 0.010                      | 0.031                    | 0.008                                           | 0.003                | 0.002                       | 0.003                         | 0.817    | 0.000                      |
| D6/ditch                    | 3.722  | 0.012                      | 0.037                    | 0.009                                           | 0.003                | 0.003                       | 0.004                         | 7.772    | 0.001                      |
| D6/ditch<br>2 <sup>nd</sup> | 3.733  | 0.012                      | 0.037                    | 0.009                                           | 0.003                | 0.003                       | 0.004                         | 13.850   | 0.001                      |
| R1/pond                     | 2.168  | 0.007                      | 0.022                    | 0.005                                           | 0.002                | 0.002                       | 0.002                         | 80.510   | 0.005                      |
| R1/stream                   | 4.241  | 0.013                      | 0.042                    | 0.011                                           | 0.003                | 0.003                       | 0.004                         | 486.300  | 0.032                      |
| R2/stream                   | 3.441  | 0.011                      | 0.034                    | 0.009                                           | 0.003                | 0.003                       | 0.003                         | 1865.200 | 0.121                      |
| R3/stream                   | 3.619  | 0.011                      | 0.036                    | 0.009                                           | 0.003                | 0.003                       | 0.004                         | 938.400  | 0.061                      |

AF: Assessment factor; PEC: Predicted environmental concentration; RAC: Regulatory acceptable concentration; PEC/RAC ratios above the relevant trigger of 1 are shown in **bold**

**Aquatic organisms: acceptability of risk (PEC/RAC < 1) for Glyphosate for each organism group based on FOCUS Steps 1, 2 and 3 calculations for the use of MON 52276 in vegetables, bulb (3 × 720 g a.s./ha, with application interval of 28 days). Uses 2 a-c.**

| Group                       |                              | Fish acute                 | Fish prolonged           | Inverteb. acute                                 | Inverteb. prolonged  | Algae                       | Aquatic macrophytes           |                                | Sed. dwell. prolonged      |
|-----------------------------|------------------------------|----------------------------|--------------------------|-------------------------------------------------|----------------------|-----------------------------|-------------------------------|--------------------------------|----------------------------|
| Test species                |                              | <i>Lepomis macrochirus</i> | <i>Brachydanio rerio</i> | <i>Crassostrea gigas</i> / <i>Daphnia magna</i> | <i>Daphnia magna</i> | <i>Skeletonema costatum</i> | <i>Myriophyllum aquaticum</i> |                                | <i>Chironomus riparius</i> |
| Endpoint (µg/L)             |                              | LC <sub>50</sub><br>32000  | NOEC<br>1000             | EC <sub>50</sub><br>40000                       | NOEC<br>12500        | ErC <sub>50</sub><br>13500  | ErC <sub>50</sub><br>10330    | Endpoint (µg/kg)               | NOEC<br>154000             |
| AF                          |                              | 100                        | 10                       | 100                                             | 10                   | 10                          | 10                            | AF                             | 10                         |
| RAC (µg/L)                  |                              | 320                        | 100                      | 400                                             | 1250                 | 1350                        | 1033                          | RAC (µg/kg)                    | 15400                      |
| FOCUS Scenario              | PEC <sub>sw,max</sub> (µg/L) |                            |                          |                                                 |                      |                             |                               | PEC <sub>sed,max</sub> (µg/kg) |                            |
| <b>Step 1</b>               |                              |                            |                          |                                                 |                      |                             |                               |                                |                            |
|                             | 125.789                      | 0.393                      | <b>1.258</b>             | 0.314                                           | 0.101                | 0.093                       | 0.122                         | 4710                           | 0.306                      |
| <b>Step 2</b>               |                              |                            |                          |                                                 |                      |                             |                               |                                |                            |
| N-Europe                    | 48.975                       | 0.153                      | 0.490                    | 0.122                                           | 0.039                | 0.036                       | 0.047                         | 2090                           | 0.136                      |
| S-Europe                    | 39.701                       | 0.124                      | 0.397                    | 0.099                                           | 0.032                | 0.029                       | 0.038                         | 1690                           | 0.110                      |
| <b>Step 3</b>               |                              |                            |                          |                                                 |                      |                             |                               |                                |                            |
| D3/ditch                    | 4.470                        | 0.014                      | 0.045                    | 0.011                                           | 0.004                | 0.003                       | 0.004                         | 4.737                          | 0.000                      |
| D4/pond                     | 0.184                        | 0.001                      | 0.002                    | 0.000                                           | 0.000                | 0.000                       | 0.000                         | 5.913                          | 0.000                      |
| D4/stream                   | 3.534                        | 0.011                      | 0.035                    | 0.009                                           | 0.003                | 0.003                       | 0.003                         | 0.826                          | 0.000                      |
| D6/ditch                    | 4.518                        | 0.014                      | 0.045                    | 0.011                                           | 0.004                | 0.003                       | 0.004                         | 20.760                         | 0.001                      |
| D6/ditch<br>2 <sup>nd</sup> | 4.518                        | 0.014                      | 0.045                    | 0.011                                           | 0.004                | 0.003                       | 0.004                         | 25.580                         | 0.002                      |
| R1/pond                     | 2.097                        | 0.007                      | 0.021                    | 0.005                                           | 0.002                | 0.002                       | 0.002                         | 76.570                         | 0.005                      |

**Aquatic organisms: acceptability of risk (PEC/RAC < 1) for Glyphosate for each organism group based on FOCUS Steps 1, 2 and 3 calculations for the use of MON 52276 in vegetables, bulb (3 × 720 g a.s./ha, with application interval of 28 days). Uses 2 a-c.**

| Group        |       | Fish acute                 | Fish prolonged           | Inverteb. acute                          | Inverteb. prolonged  | Algae                       | Aquatic macrophytes           |          | Sed. dwell. prolonged      |
|--------------|-------|----------------------------|--------------------------|------------------------------------------|----------------------|-----------------------------|-------------------------------|----------|----------------------------|
| Test species |       | <i>Lepomis macrochirus</i> | <i>Brachydanio rerio</i> | <i>Crassostrea gigas / Daphnia magna</i> | <i>Daphnia magna</i> | <i>Skeletonema costatum</i> | <i>Myriophyllum aquaticum</i> |          | <i>Chironomus riparius</i> |
| R1/stream    | 4.108 | 0.013                      | 0.041                    | 0.010                                    | 0.003                | 0.003                       | 0.004                         | 488.300  | 0.032                      |
| R2/stream    | 3.969 | 0.012                      | 0.040                    | 0.010                                    | 0.003                | 0.003                       | 0.004                         | 1954.600 | 0.127                      |
| R3/stream    | 4.174 | 0.013                      | 0.042                    | 0.010                                    | 0.003                | 0.003                       | 0.004                         | 587.200  | 0.038                      |
| R4/stream    | 5.480 | 0.017                      | 0.055                    | 0.014                                    | 0.004                | 0.004                       | 0.005                         | 459.900  | 0.030                      |

AF: Assessment factor; PEC: Predicted environmental concentration; RAC: Regulatory acceptable concentration; PEC/RAC ratios above the relevant trigger of 1 are shown in **bold**

**Aquatic organisms: acceptability of risk (PEC/RAC < 1) for Glyphosate for each organism group based on FOCUS Steps 1, 2 and 3 calculations for the use of MON 52276 in vegetables, fruiting (3 × 720 g a.s./ha, with application interval of 28 days). Uses 2 a-c.**

| Group           |                              | Fish acute                 | Fish prolonged           | Inverteb. acute                          | Inverteb. prolonged  | Algae                       | Aquatic macrophytes           |                                      | Sed. dwell. prolonged      |
|-----------------|------------------------------|----------------------------|--------------------------|------------------------------------------|----------------------|-----------------------------|-------------------------------|--------------------------------------|----------------------------|
| Test species    |                              | <i>Lepomis macrochirus</i> | <i>Brachydanio rerio</i> | <i>Crassostrea gigas / Daphnia magna</i> | <i>Daphnia magna</i> | <i>Skeletonema costatum</i> | <i>Myriophyllum aquaticum</i> |                                      | <i>Chironomus riparius</i> |
| Endpoint (µg/L) |                              | LC <sub>50</sub><br>32000  | NOEC<br>1000             | EC <sub>50</sub><br>40000                | NOEC<br>12500        | ErC <sub>50</sub><br>13500  | ErC <sub>50</sub><br>10330    | <b>Endpoint (µg/kg)</b>              | NOEC<br>154000             |
| AF              |                              | 100                        | 10                       | 100                                      | 10                   | 10                          | 10                            | <b>AF</b>                            | 10                         |
| RAC (µg/L)      |                              | 320                        | 100                      | 400                                      | 1250                 | 1350                        | 1033                          | <b>RAC (µg/kg)</b>                   | 15400                      |
| FOCUS Scenario  | PEC <sub>sw,max</sub> (µg/L) |                            |                          |                                          |                      |                             |                               | <b>PEC<sub>sed,max</sub> (µg/kg)</b> |                            |

**Aquatic organisms: acceptability of risk (PEC/RAC < 1) for Glyphosate for each organism group based on FOCUS Steps 1, 2 and 3 calculations for the use of MON 52276 in vegetables, fruiting (3 × 720 g a.s./ha, with application interval of 28 days). Uses 2 a-c.**

| Group         |         | Fish acute                 | Fish prolonged           | Inverteb. acute                          | Inverteb. prolonged  | Algae                       | Aquatic macrophytes           |          | Sed. dwell. prolonged      |
|---------------|---------|----------------------------|--------------------------|------------------------------------------|----------------------|-----------------------------|-------------------------------|----------|----------------------------|
| Test species  |         | <i>Lepomis macrochirus</i> | <i>Brachydanio rerio</i> | <i>Crassostrea gigas / Daphnia magna</i> | <i>Daphnia magna</i> | <i>Skeletonema costatum</i> | <i>Myriophyllum aquaticum</i> |          | <i>Chironomus riparius</i> |
| <b>Step 1</b> |         |                            |                          |                                          |                      |                             |                               |          |                            |
|               | 125.789 | 0.393                      | <b>1.258</b>             | 0.314                                    | 0.101                | 0.093                       | 0.122                         | 4710     | 0.306                      |
| <b>Step 2</b> |         |                            |                          |                                          |                      |                             |                               |          |                            |
| N-Europe      | 48.975  | 0.153                      | 0.490                    | 0.122                                    | 0.039                | 0.036                       | 0.047                         | 2090     | 0.136                      |
| S-Europe      | 39.701  | 0.124                      | 0.397                    | 0.099                                    | 0.032                | 0.029                       | 0.038                         | 1690     | 0.110                      |
| <b>Step 3</b> |         |                            |                          |                                          |                      |                             |                               |          |                            |
| D6/ditch      | 4.509   | 0.014                      | 0.045                    | 0.011                                    | 0.004                | 0.003                       | 0.004                         | 20.900   | 0.001                      |
| R2/stream     | 3.969   | 0.012                      | 0.040                    | 0.010                                    | 0.003                | 0.003                       | 0.004                         | 2668.800 | 0.173                      |
| R3/stream     | 4.175   | 0.013                      | 0.042                    | 0.010                                    | 0.003                | 0.003                       | 0.004                         | 938.300  | 0.061                      |
| R4/stream     | 5.938   | 0.019                      | 0.059                    | 0.015                                    | 0.005                | 0.004                       | 0.006                         | 616.500  | 0.040                      |

AF: Assessment factor; PEC: Predicted environmental concentration; RAC: Regulatory acceptable concentration; PEC/RAC ratios above the relevant trigger of 1 are shown in **bold**

**Aquatic organisms: acceptability of risk (PEC/RAC < 1) for Glyphosate for each organism group based on FOCUS Steps 1, 2 and 3 calculations for the use of MON 52276 in vegetables, leafy (3 × 720 g a.s./ha, with application interval of 28 days). Uses 2 a-c.**

| Group        |  | Fish acute                 | Fish prolonged           | Inverteb. acute                          | Inverteb. prolonged  | Algae                       | Aquatic macrophytes           |                 | Sed. dwell. prolonged      |
|--------------|--|----------------------------|--------------------------|------------------------------------------|----------------------|-----------------------------|-------------------------------|-----------------|----------------------------|
| Test species |  | <i>Lepomis macrochirus</i> | <i>Brachydanio rerio</i> | <i>Crassostrea gigas / Daphnia magna</i> | <i>Daphnia magna</i> | <i>Skeletonema costatum</i> | <i>Myriophyllum aquaticum</i> |                 | <i>Chironomus riparius</i> |
| Endpoint     |  | LC <sub>50</sub>           | NOEC                     | EC <sub>50</sub>                         | NOEC                 | ErC <sub>50</sub>           | ErC <sub>50</sub>             | <b>Endpoint</b> | NOEC                       |



**Aquatic organisms: acceptability of risk (PEC/RAC < 1) for Glyphosate for each organism group based on FOCUS Steps 1, 2 and 3 calculations for the use of MON 52276 in vegetables, leafy (3 × 720 g a.s./ha, with application interval of 28 days). Uses 2 a-c.**

| Group                    |                              | Fish acute                 | Fish prolonged           | Inverteb. acute                                 | Inverteb. prolonged  | Algae                       | Aquatic macrophytes           |                                | Sed. dwell. prolonged      |
|--------------------------|------------------------------|----------------------------|--------------------------|-------------------------------------------------|----------------------|-----------------------------|-------------------------------|--------------------------------|----------------------------|
| Test species             |                              | <i>Lepomis macrochirus</i> | <i>Brachydanio rerio</i> | <i>Crassostrea gigas</i> / <i>Daphnia magna</i> | <i>Daphnia magna</i> | <i>Skeletonema costatum</i> | <i>Myriophyllum aquaticum</i> |                                | <i>Chironomus riparius</i> |
| (µg/L)                   |                              | 32000                      | 1000                     | 40000                                           | 12500                | 13500                       | 10330                         | (µg/kg)                        | 154000                     |
| AF                       |                              | 100                        | 10                       | 100                                             | 10                   | 10                          | 10                            | AF                             | 10                         |
| RAC (µg/L)               |                              | 320                        | 100                      | 400                                             | 1250                 | 1350                        | 1033                          | RAC (µg/kg)                    | 15400                      |
| FOCUS Scenario           | PEC <sub>sw,max</sub> (µg/L) |                            |                          |                                                 |                      |                             |                               | PEC <sub>sed,max</sub> (µg/kg) |                            |
| <b>Step 1</b>            |                              |                            |                          |                                                 |                      |                             |                               |                                |                            |
|                          | 125.789                      | 0.393                      | <b>1.258</b>             | 0.314                                           | 0.101                | 0.093                       | 0.122                         | 4710                           | 0.306                      |
| <b>Step 2</b>            |                              |                            |                          |                                                 |                      |                             |                               |                                |                            |
| N-Europe                 | 48.975                       | 0.153                      | 0.490                    | 0.122                                           | 0.039                | 0.036                       | 0.047                         | 2090                           | 0.136                      |
| S-Europe                 | 39.701                       | 0.124                      | 0.397                    | 0.099                                           | 0.032                | 0.029                       | 0.038                         | 1690                           | 0.110                      |
| <b>Step 3</b>            |                              |                            |                          |                                                 |                      |                             |                               |                                |                            |
| D3/ditch                 | 4.486                        | 0.014                      | 0.045                    | 0.011                                           | 0.004                | 0.003                       | 0.004                         | 5.137                          | 0.000                      |
| D3/ditch 2 <sup>nd</sup> | 4.482                        | 0.014                      | 0.045                    | 0.011                                           | 0.004                | 0.003                       | 0.004                         | 6.189                          | 0.000                      |
| D4/pond                  | 0.197                        | 0.001                      | 0.002                    | 0.000                                           | 0.000                | 0.000                       | 0.000                         | 5.764                          | 0.000                      |
| D4/stream                | 3.605                        | 0.011                      | 0.036                    | 0.009                                           | 0.003                | 0.003                       | 0.003                         | 0.881                          | 0.000                      |
| D6/ditch                 | 4.518                        | 0.014                      | 0.045                    | 0.011                                           | 0.004                | 0.003                       | 0.004                         | 21.330                         | 0.001                      |
| R1/pond                  | 1.855                        | 0.006                      | 0.019                    | 0.005                                           | 0.001                | 0.001                       | 0.002                         | 77.990                         | 0.005                      |
| R1/pond 2 <sup>nd</sup>  | 2.178                        | 0.007                      | 0.022                    | 0.005                                           | 0.002                | 0.002                       | 0.002                         | 83.780                         | 0.005                      |

**Aquatic organisms: acceptability of risk (PEC/RAC < 1) for Glyphosate for each organism group based on FOCUS Steps 1, 2 and 3 calculations for the use of MON 52276 in vegetables, leafy (3 × 720 g a.s./ha, with application interval of 28 days). Uses 2 a-c.**

| Group                     |       | Fish acute                 | Fish prolonged           | Inverteb. acute                          | Inverteb. prolonged  | Algae                       | Aquatic macrophytes           |          | Sed. dwell. prolonged      |
|---------------------------|-------|----------------------------|--------------------------|------------------------------------------|----------------------|-----------------------------|-------------------------------|----------|----------------------------|
| Test species              |       | <i>Lepomis macrochirus</i> | <i>Brachydanio rerio</i> | <i>Crassostrea gigas / Daphnia magna</i> | <i>Daphnia magna</i> | <i>Skeletonema costatum</i> | <i>Myriophyllum aquaticum</i> |          | <i>Chironomus riparius</i> |
| R1/stream                 | 4.056 | 0.013                      | 0.041                    | 0.010                                    | 0.003                | 0.003                       | 0.004                         | 478.400  | 0.031                      |
| R1/stream 2 <sup>nd</sup> | 3.986 | 0.012                      | 0.040                    | 0.010                                    | 0.003                | 0.003                       | 0.004                         | 848      | 0.055                      |
| R2/stream                 | 3.969 | 0.012                      | 0.040                    | 0.010                                    | 0.003                | 0.003                       | 0.004                         | 2078.900 | 0.135                      |
| R2/stream 2 <sup>nd</sup> | 3.969 | 0.012                      | 0.040                    | 0.010                                    | 0.003                | 0.003                       | 0.004                         | 1896.500 | 0.123                      |
| R3/stream                 | 4.175 | 0.013                      | 0.042                    | 0.010                                    | 0.003                | 0.003                       | 0.004                         | 1425.200 | 0.093                      |
| R3/stream 2 <sup>nd</sup> | 4.175 | 0.013                      | 0.042                    | 0.010                                    | 0.003                | 0.003                       | 0.004                         | 938.200  | 0.061                      |
| R4/stream                 | 5.207 | 0.016                      | 0.052                    | 0.013                                    | 0.004                | 0.004                       | 0.005                         | 724.500  | 0.047                      |
| R4/stream 2 <sup>nd</sup> | 5.612 | 0.018                      | 0.056                    | 0.014                                    | 0.004                | 0.004                       | 0.005                         | 1048.500 | 0.068                      |

AF: Assessment factor; PEC: Predicted environmental concentration; RAC: Regulatory acceptable concentration; PEC/RAC ratios above the relevant trigger of 1 are shown in **bold**

**Aquatic organisms: acceptability of risk (PEC/RAC < 1) for Glyphosate for each organism group based on FOCUS Steps 1, 2 and 3 calculations for the use of MON 52276 in sugar beets (3 × 720 g a.s./ha, with application interval of 28 days). Uses 2 a-c.**

| Group           |                              | Fish acute                 | Fish prolonged           | Inverteb. acute                                 | Inverteb. prolonged  | Algae                       | Aquatic macrophytes           |                                | Sed. dwell. prolonged      |
|-----------------|------------------------------|----------------------------|--------------------------|-------------------------------------------------|----------------------|-----------------------------|-------------------------------|--------------------------------|----------------------------|
| Test species    |                              | <i>Lepomis macrochirus</i> | <i>Brachydanio rerio</i> | <i>Crassostrea gigas</i> / <i>Daphnia magna</i> | <i>Daphnia magna</i> | <i>Skeletonema costatum</i> | <i>Myriophyllum aquaticum</i> |                                | <i>Chironomus riparius</i> |
| Endpoint (µg/L) |                              | LC <sub>50</sub><br>32000  | NOEC<br>1000             | EC <sub>50</sub><br>40000                       | NOEC<br>12500        | ErC <sub>50</sub><br>13500  | ErC <sub>50</sub><br>10330    | Endpoint (µg/kg)               | NOEC<br>154000             |
| AF              |                              | 100                        | 10                       | 100                                             | 10                   | 10                          | 10                            | AF                             | 10                         |
| RAC (µg/L)      |                              | 320                        | 100                      | 400                                             | 1250                 | 1350                        | 1033                          | RAC (µg/kg)                    | 15400                      |
| FOCUS Scenario  | PEC <sub>sw,max</sub> (µg/L) |                            |                          |                                                 |                      |                             |                               | PEC <sub>sed,max</sub> (µg/kg) |                            |
| <b>Step 1</b>   |                              |                            |                          |                                                 |                      |                             |                               |                                |                            |
|                 | 125.789                      | 0.393                      | <b>1.258</b>             | 0.314                                           | 0.101                | 0.093                       | 0.122                         | 4710                           | 0.306                      |
| <b>Step 2</b>   |                              |                            |                          |                                                 |                      |                             |                               |                                |                            |
| N-Europe        | 48.975                       | 0.153                      | 0.490                    | 0.122                                           | 0.039                | 0.036                       | 0.047                         | 2090                           | 0.136                      |
| S-Europe        | 39.701                       | 0.124                      | 0.397                    | 0.099                                           | 0.032                | 0.029                       | 0.038                         | 1690                           | 0.110                      |
| <b>Step 3</b>   |                              |                            |                          |                                                 |                      |                             |                               |                                |                            |
| D3/ditch        | 3.696                        | 0.012                      | 0.037                    | 0.009                                           | 0.003                | 0.003                       | 0.004                         | 4.167                          | 0.000                      |
| D4/pond         | 0.149                        | 0.000                      | 0.001                    | 0.000                                           | 0.000                | 0.000                       | 0.000                         | 4.818                          | 0.000                      |
| D4/stream       | 3.239                        | 0.010                      | 0.032                    | 0.008                                           | 0.003                | 0.002                       | 0.003                         | 0.635                          | 0.000                      |
| R1/pond         | 2.171                        | 0.007                      | 0.022                    | 0.005                                           | 0.002                | 0.002                       | 0.002                         | 72.980                         | 0.005                      |
| R1/stream       | 4.083                        | 0.013                      | 0.041                    | 0.010                                           | 0.003                | 0.003                       | 0.004                         | 546.800                        | 0.036                      |
| R3/stream       | 3.619                        | 0.011                      | 0.036                    | 0.009                                           | 0.003                | 0.003                       | 0.004                         | 938.400                        | 0.061                      |

**Aquatic organisms: acceptability of risk (PEC/RAC < 1) for Glyphosate for each organism group based on FOCUS Steps 1, 2 and 3 calculations for the use of MON 52276 in sugar beets (3 × 720 g a.s./ha, with application interval of 28 days). Uses 2 a-c.**

| Group        |  | Fish acute                 | Fish prolonged           | Inverteb. acute                          | Inverteb. prolonged  | Algae                       | Aquatic macrophytes           |  | Sed. dwell. prolonged      |
|--------------|--|----------------------------|--------------------------|------------------------------------------|----------------------|-----------------------------|-------------------------------|--|----------------------------|
| Test species |  | <i>Lepomis macrochirus</i> | <i>Brachydanio rerio</i> | <i>Crassostrea gigas / Daphnia magna</i> | <i>Daphnia magna</i> | <i>Skeletonema costatum</i> | <i>Myriophyllum aquaticum</i> |  | <i>Chironomus riparius</i> |

AF: Assessment factor; PEC: Predicted environmental concentration; RAC: Regulatory acceptable concentration; PEC/RAC ratios above the relevant trigger of 1 are shown in **bold**

**Aquatic organisms: acceptability of risk (PEC/RAC < 1) for Glyphosate for each organism group based on FOCUS Steps 1, 2 and 3 calculations for the use of MON 52276 in pome/stone fruit (3 × 720 g a.s./ha, with application interval of 28 days). Uses 4 a-c.**

| Group           |                              | Fish acute                 | Fish prolonged           | Inverteb. acute                          | Inverteb. prolonged  | Algae                       | Aquatic macrophytes                     |                                | Sed. dwell. prolonged      |
|-----------------|------------------------------|----------------------------|--------------------------|------------------------------------------|----------------------|-----------------------------|-----------------------------------------|--------------------------------|----------------------------|
| Test species    |                              | <i>Lepomis macrochirus</i> | <i>Brachydanio rerio</i> | <i>Crassostrea gigas / Daphnia magna</i> | <i>Daphnia magna</i> | <i>Skeletonema costatum</i> | <i>Myriophyllum aquaticum</i>           |                                | <i>Chironomus riparius</i> |
| Endpoint (µg/L) |                              | LC <sub>50</sub><br>32000  | NOEC<br>1000             | EC <sub>50</sub><br>40000                | NOEC<br>12500        | ErC <sub>50</sub><br>13500  | E <sub>r</sub> C <sub>50</sub><br>10330 | Endpoint (µg/kg)               | NOEC<br>154000             |
| AF              |                              | 100                        | 10                       | 100                                      | 10                   | 10                          | 10                                      | AF                             | 10                         |
| RAC (µg/L)      |                              | 320                        | 100                      | 400                                      | 1250                 | 1350                        | 1033                                    | RAC (µg/kg)                    | 15400                      |
| FOCUS Scenario  | PEC <sub>sw,max</sub> (µg/L) |                            |                          |                                          |                      |                             |                                         | PEC <sub>sed,max</sub> (µg/kg) |                            |
| <b>Step 1</b>   |                              |                            |                          |                                          |                      |                             |                                         |                                |                            |
|                 | 125.789                      | 0.393                      | <b>1.258</b>             | 0.314                                    | 0.101                | 0.093                       | 0.122                                   | 4710                           | 0.306                      |
| <b>Step 2</b>   |                              |                            |                          |                                          |                      |                             |                                         |                                |                            |
| N-Europe        | 48.975                       | 0.153                      | 0.490                    | 0.122                                    | 0.039                | 0.036                       | 0.047                                   | 2090                           | 0.136                      |

**Aquatic organisms: acceptability of risk (PEC/RAC < 1) for Glyphosate for each organism group based on FOCUS Steps 1, 2 and 3 calculations for the use of MON 52276 in pome/stone fruit (3 × 720 g a.s./ha, with application interval of 28 days). Uses 4 a-c.**

| Group         |        | Fish acute                 | Fish prolonged           | Inverteb. acute                          | Inverteb. prolonged  | Algae                       | Aquatic macrophytes           |        | Sed. dwell. prolonged      |
|---------------|--------|----------------------------|--------------------------|------------------------------------------|----------------------|-----------------------------|-------------------------------|--------|----------------------------|
| Test species  |        | <i>Lepomis macrochirus</i> | <i>Brachydanio rerio</i> | <i>Crassostrea gigas / Daphnia magna</i> | <i>Daphnia magna</i> | <i>Skeletonema costatum</i> | <i>Myriophyllum aquaticum</i> |        | <i>Chironomus riparius</i> |
| S-Europe      | 39.701 | 0.124                      | 0.397                    | 0.099                                    | 0.032                | 0.029                       | 0.038                         | 1690   | 0.110                      |
| <b>Step 3</b> |        |                            |                          |                                          |                      |                             |                               |        |                            |
| D3/ditch      | 1.894  | 0.006                      | 0.019                    | 0.005                                    | 0.002                | 0.001                       | 0.002                         | 3.481  | 0.000                      |
| D4/pond       | 0.136  | 0.000                      | 0.001                    | 0.000                                    | 0.000                | 0.000                       | 0.000                         | 4.529  | 0.000                      |
| D4/stream     | 1.674  | 0.005                      | 0.017                    | 0.004                                    | 0.001                | 0.001                       | 0.002                         | 0.554  | 0.000                      |
| D5/pond       | 0.138  | 0.000                      | 0.001                    | 0.000                                    | 0.000                | 0.000                       | 0.000                         | 4.316  | 0.000                      |
| D5/stream     | 1.849  | 0.006                      | 0.018                    | 0.005                                    | 0.001                | 0.001                       | 0.002                         | 1.032  | 0.000                      |
| R1/pond       | 0.181  | 0.001                      | 0.002                    | 0.000                                    | 0.000                | 0.000                       | 0.000                         | 7.712  | 0.001                      |
| R1/stream     | 3.103  | 0.010                      | 0.031                    | 0.008                                    | 0.002                | 0.002                       | 0.003                         | 8.543  | 0.001                      |
| R2/stream     | 1.757  | 0.005                      | 0.018                    | 0.004                                    | 0.001                | 0.001                       | 0.002                         | 82.570 | 0.005                      |
| R3/stream     | 1.880  | 0.006                      | 0.019                    | 0.005                                    | 0.002                | 0.001                       | 0.002                         | 42.090 | 0.003                      |
| R4/stream     | 4.414  | 0.014                      | 0.044                    | 0.011                                    | 0.004                | 0.003                       | 0.004                         | 39.640 | 0.003                      |

AF: Assessment factor; PEC: Predicted environmental concentration; RAC: Regulatory acceptable concentration; PEC/RAC ratios above the relevant trigger of 1 are shown in **bold**

**Aquatic organisms: acceptability of risk (PEC/RAC < 1) for Glyphosate for each organism group based on FOCUS Steps 1, 2 and 3 calculations for the use of MON 52276 in olives (3 × 720 g a.s./ha, with application interval of 28 days). Uses 4 a-c.**

| Group           |                              | Fish acute                 | Fish prolonged           | Inverteb. acute                          | Inverteb. prolonged  | Algae                       | Aquatic macrophytes           |                                | Sed. dwell. prolonged      |
|-----------------|------------------------------|----------------------------|--------------------------|------------------------------------------|----------------------|-----------------------------|-------------------------------|--------------------------------|----------------------------|
| Test species    |                              | <i>Lepomis macrochirus</i> | <i>Brachydanio rerio</i> | <i>Crassostrea gigas / Daphnia magna</i> | <i>Daphnia magna</i> | <i>Skeletonema costatum</i> | <i>Myriophyllum aquaticum</i> |                                | <i>Chironomus riparius</i> |
| Endpoint (µg/L) |                              | LC <sub>50</sub><br>32000  | NOEC<br>1000             | EC <sub>50</sub><br>40000                | NOEC<br>12500        | ErC <sub>50</sub><br>13500  | ErC <sub>50</sub><br>10330    | Endpoint (µg/kg)               | NOEC<br>154000             |
| AF              |                              | 100                        | 10                       | 100                                      | 10                   | 10                          | 10                            | AF                             | 10                         |
| RAC (µg/L)      |                              | 320                        | 100                      | 400                                      | 1250                 | 1350                        | 1033                          | RAC (µg/kg)                    | 15400                      |
| FOCUS Scenario  | PEC <sub>sw,max</sub> (µg/L) |                            |                          |                                          |                      |                             |                               | PEC <sub>sed,max</sub> (µg/kg) |                            |
| <b>Step 1</b>   |                              |                            |                          |                                          |                      |                             |                               |                                |                            |
|                 | 125.789                      | 0.393                      | <b>1.258</b>             | 0.314                                    | 0.101                | 0.093                       | 0.122                         | 4710                           | 0.306                      |
| <b>Step 2</b>   |                              |                            |                          |                                          |                      |                             |                               |                                |                            |
| N-Europe        | 48.975                       | 0.153                      | 0.490                    | 0.122                                    | 0.039                | 0.036                       | 0.047                         | 2090                           | 0.136                      |
| S-Europe        | 39.701                       | 0.124                      | 0.397                    | 0.099                                    | 0.032                | 0.029                       | 0.038                         | 1690                           | 0.110                      |
| <b>Step 3</b>   |                              |                            |                          |                                          |                      |                             |                               |                                |                            |
| D6/ditch        | 1.902                        | 0.006                      | 0.019                    | 0.005                                    | 0.002                | 0.001                       | 0.002                         | 12.460                         | 0.001                      |
| R4/stream       | 5.228                        | 0.016                      | 0.052                    | 0.013                                    | 0.004                | 0.004                       | 0.005                         | 46.770                         | 0.003                      |

AF: Assessment factor; PEC: Predicted environmental concentration; RAC: Regulatory acceptable concentration; PEC/RAC ratios above the relevant trigger of 1 are shown in **bold**

**Aquatic organisms: acceptability of risk (PEC/RAC < 1) for Glyphosate for each organism group based on FOCUS Steps 1, 2 and 3 calculations for the use of MON 52276 in vines (3 × 720 g a.s./ha, with application interval of 28 days). Uses 5 a-c.**

| Group           |                              | Fish acute                 | Fish prolonged           | Inverteb. acute                          | Inverteb. prolonged  | Algae                       | Aquatic macrophytes           |                                | Sed. dwell. prolonged      |
|-----------------|------------------------------|----------------------------|--------------------------|------------------------------------------|----------------------|-----------------------------|-------------------------------|--------------------------------|----------------------------|
| Test species    |                              | <i>Lepomis macrochirus</i> | <i>Brachydanio rerio</i> | <i>Crassostrea gigas / Daphnia magna</i> | <i>Daphnia magna</i> | <i>Skeletonema costatum</i> | <i>Myriophyllum aquaticum</i> |                                | <i>Chironomus riparius</i> |
| Endpoint (µg/L) |                              | LC <sub>50</sub><br>32000  | NOEC<br>1000             | EC <sub>50</sub><br>40000                | NOEC<br>12500        | ErC <sub>50</sub><br>13500  | ErC <sub>50</sub><br>10330    | Endpoint (µg/kg)               | NOEC<br>154000             |
| AF              |                              | 100                        | 10                       | 100                                      | 10                   | 10                          | 10                            | AF                             | 10                         |
| RAC (µg/L)      |                              | 320                        | 100                      | 400                                      | 1250                 | 1350                        | 1033                          | RAC (µg/kg)                    | 15400                      |
| FOCUS Scenario  | PEC <sub>sw,max</sub> (µg/L) |                            |                          |                                          |                      |                             |                               | PEC <sub>sed,max</sub> (µg/kg) |                            |
| <b>Step 1</b>   |                              |                            |                          |                                          |                      |                             |                               |                                |                            |
|                 | 125.789                      | 0.393                      | <b>1.258</b>             | 0.314                                    | 0.101                | 0.093                       | 0.122                         | 4710                           | 0.306                      |
| <b>Step 2</b>   |                              |                            |                          |                                          |                      |                             |                               |                                |                            |
| N-Europe        | 48.975                       | 0.153                      | 0.490                    | 0.122                                    | 0.039                | 0.036                       | 0.047                         | 2090                           | 0.136                      |
| S-Europe        | 39.701                       | 0.124                      | 0.397                    | 0.099                                    | 0.032                | 0.029                       | 0.038                         | 1690                           | 0.110                      |
| <b>Step 3</b>   |                              |                            |                          |                                          |                      |                             |                               |                                |                            |
| D6/ditch        | 1.902                        | 0.006                      | 0.019                    | 0.005                                    | 0.002                | 0.001                       | 0.002                         | 12.470                         | 0.001                      |
| R1/pond         | 0.179                        | 0.001                      | 0.002                    | 0.000                                    | 0.000                | 0.000                       | 0.000                         | 7.700                          | 0.001                      |
| R1/stream       | 2.997                        | 0.009                      | 0.030                    | 0.007                                    | 0.002                | 0.002                       | 0.003                         | 8.560                          | 0.001                      |
| R2/stream       | 1.757                        | 0.005                      | 0.018                    | 0.004                                    | 0.001                | 0.001                       | 0.002                         | 82.570                         | 0.005                      |
| R3/stream       | 1.869                        | 0.006                      | 0.019                    | 0.005                                    | 0.001                | 0.001                       | 0.002                         | 42.070                         | 0.003                      |
| R4/stream       | 5.009                        | 0.016                      | 0.050                    | 0.013                                    | 0.004                | 0.004                       | 0.005                         | 41.540                         | 0.003                      |

**Aquatic organisms: acceptability of risk (PEC/RAC < 1) for Glyphosate for each organism group based on FOCUS Steps 1, 2 and 3 calculations for the use of MON 52276 in vines (3 × 720 g a.s./ha, with application interval of 28 days). Uses 5 a-c.**

| Group        |  | Fish acute                 | Fish prolonged           | Inverteb. acute                          | Inverteb. prolonged  | Algae                       | Aquatic macrophytes           |  | Sed. dwell. prolonged      |
|--------------|--|----------------------------|--------------------------|------------------------------------------|----------------------|-----------------------------|-------------------------------|--|----------------------------|
| Test species |  | <i>Lepomis macrochirus</i> | <i>Brachydanio rerio</i> | <i>Crassostrea gigas / Daphnia magna</i> | <i>Daphnia magna</i> | <i>Skeletonema costatum</i> | <i>Myriophyllum aquaticum</i> |  | <i>Chironomus riparius</i> |

AF: Assessment factor; PEC: Predicted environmental concentration; RAC: Regulatory acceptable concentration; PEC/RAC ratios above the relevant trigger of 1 are shown in **bold**

**Aquatic organisms: acceptability of risk (PEC/RAC < 1) for AMPA for each organism group based on FOCUS Steps 1, 2 and 3 calculations for the use of MON 52276 in field crops<sup>1</sup> (3 × 720 g a.s./ha, with application interval of 28 days). Uses 2 a-c.**

| Group                                            |                              | Fish acute                 | Fish prolonged             | Inverteb. acute            | Inverteb. prolonged  | Algae                                   | Aquatic macrophytes                     |                                | Sed. dwell. prolonged      |
|--------------------------------------------------|------------------------------|----------------------------|----------------------------|----------------------------|----------------------|-----------------------------------------|-----------------------------------------|--------------------------------|----------------------------|
| Test species                                     |                              | <i>Oncorhynchus mykiss</i> | <i>Pimephales promelas</i> | <i>Daphnia magna</i>       | <i>Daphnia magna</i> | <i>Pseudokirchneriella subcapitata</i>  | <i>Myriophyllum aquaticum</i>           |                                | <i>Chironomus riparius</i> |
| Endpoint (µg/L)                                  |                              | LC <sub>50</sub><br>100000 | NOEC<br>12000              | EC <sub>50</sub><br>690000 | NOEC<br>15000        | E <sub>r</sub> C <sub>50</sub><br>31900 | E <sub>r</sub> C <sub>50</sub><br>72000 | Endpoint (µg/kg)               | NOEC<br>786500             |
| AF                                               |                              | 100                        | 10                         | 100                        | 10                   | 10                                      | 10                                      | AF                             | 10                         |
| RAC (µg/L)                                       |                              | 1000                       | 1200                       | 6900                       | 1500                 | 3190                                    | 7200                                    | RAC (µg/kg)                    | 78650                      |
| FOCUS Scenario                                   | PEC <sub>sw,max</sub> (µg/L) |                            |                            |                            |                      |                                         |                                         | PEC <sub>sed,max</sub> (µg/kg) |                            |
| <b>Step 1 (DT<sub>50</sub> wat/sed = 89.9 d)</b> |                              |                            |                            |                            |                      |                                         |                                         |                                |                            |
|                                                  | 100.494                      | 0.100                      | 0.084                      | 0.015                      | 0.067                | 0.032                                   | 0.014                                   | 2470                           | 0.031                      |
| <b>Step 2 (DT<sub>50</sub> wat/sed = 89.9 d)</b> |                              |                            |                            |                            |                      |                                         |                                         |                                |                            |
| N-Europe                                         | 46.595                       | 0.047                      | 0.039                      | 0.007                      | 0.031                | 0.015                                   | 0.006                                   | 1180                           | 0.015                      |
| S-Europe                                         | 37.402                       | 0.037                      | 0.031                      | 0.005                      | 0.025                | 0.012                                   | 0.005                                   | 944.972                        | 0.012                      |



**Aquatic organisms: acceptability of risk (PEC/RAC < 1) for AMPA for each organism group based on FOCUS Steps 1, 2 and 3 calculations for the use of MON 52276 in field crops<sup>1</sup> (3 × 720 g a.s./ha, with application interval of 28 days). Uses 2 a-c.**

| Group        |  | Fish acute                 | Fish prolonged             | Inverteb. acute      | Inverteb. prolonged  | Algae                                  | Aquatic macrophytes           |  | Sed. dwell. prolonged      |
|--------------|--|----------------------------|----------------------------|----------------------|----------------------|----------------------------------------|-------------------------------|--|----------------------------|
| Test species |  | <i>Oncorhynchus mykiss</i> | <i>Pimephales promelas</i> | <i>Daphnia magna</i> | <i>Daphnia magna</i> | <i>Pseudokirchneriella subcapitata</i> | <i>Myriophyllum aquaticum</i> |  | <i>Chironomus riparius</i> |

AF: Assessment factor; PEC: Predicted environmental concentration; RAC: Regulatory acceptable concentration; PEC/RAC ratios above the relevant trigger of 1 are shown in **bold**

<sup>1</sup> covering all corresponding uses in root vegetables, potatoes, bulb vegetables, fruiting vegetables, leafy vegetables and sugar beets

**Aquatic organisms: acceptability of risk (PEC/RAC < 1) for AMPA for each organism group based on FOCUS Steps 1, 2 and 3 calculations for the use of MON 52276 in orchards<sup>1</sup> (3 × 720 g a.s./ha, with application interval of 28 days). Uses 4 a-c.**

| Group                                            |                              | Fish acute                 | Fish prolonged             | Inverteb. acute            | Inverteb. prolonged  | Algae                                   | Aquatic macrophytes                     |                                | Sed. dwell. prolonged      |
|--------------------------------------------------|------------------------------|----------------------------|----------------------------|----------------------------|----------------------|-----------------------------------------|-----------------------------------------|--------------------------------|----------------------------|
| Test species                                     |                              | <i>Oncorhynchus mykiss</i> | <i>Pimephales promelas</i> | <i>Daphnia magna</i>       | <i>Daphnia magna</i> | <i>Pseudokirchneriella subcapitata</i>  | <i>Myriophyllum aquaticum</i>           |                                | <i>Chironomus riparius</i> |
| Endpoint (µg/L)                                  |                              | LC <sub>50</sub><br>100000 | NOEC<br>12000              | EC <sub>50</sub><br>690000 | NOEC<br>15000        | E <sub>r</sub> C <sub>50</sub><br>31900 | E <sub>r</sub> C <sub>50</sub><br>72000 | Endpoint (µg/kg)               | NOEC<br>786500             |
| AF                                               |                              | 100                        | 10                         | 100                        | 10                   | 10                                      | 10                                      | AF                             | 10                         |
| RAC (µg/L)                                       |                              | 1000                       | 1200                       | 6900                       | 1500                 | 3190                                    | 7200                                    | RAC (µg/kg)                    | 78650                      |
| FOCUS Scenario                                   | PEC <sub>sw,max</sub> (µg/L) |                            |                            |                            |                      |                                         |                                         | PEC <sub>sed,max</sub> (µg/kg) |                            |
| <b>Step 1 (DT<sub>50</sub> wat/sed = 89.9 d)</b> |                              |                            |                            |                            |                      |                                         |                                         |                                |                            |
|                                                  | 100.494                      | 0.100                      | 0.084                      | 0.015                      | 0.067                | 0.032                                   | 0.014                                   | 2470                           | 0.031                      |
| <b>Step 2 (DT<sub>50</sub> wat/sed = 89.9 d)</b> |                              |                            |                            |                            |                      |                                         |                                         |                                |                            |
| N-Europe                                         | 46.595                       | 0.047                      | 0.039                      | 0.007                      | 0.031                | 0.015                                   | 0.006                                   | 1180                           | 0.015                      |

**Aquatic organisms: acceptability of risk (PEC/RAC < 1) for AMPA for each organism group based on FOCUS Steps 1, 2 and 3 calculations for the use of MON 52276 in orchards<sup>1</sup> (3 × 720 g a.s./ha, with application interval of 28 days). Uses 4 a-c.**

| Group        |        | Fish acute                 | Fish prolonged             | Inverteb. acute      | Inverteb. prolonged  | Algae                                  | Aquatic macrophytes           |         | Sed. dwell. prolonged      |
|--------------|--------|----------------------------|----------------------------|----------------------|----------------------|----------------------------------------|-------------------------------|---------|----------------------------|
| Test species |        | <i>Oncorhynchus mykiss</i> | <i>Pimephales promelas</i> | <i>Daphnia magna</i> | <i>Daphnia magna</i> | <i>Pseudokirchneriella subcapitata</i> | <i>Myriophyllum aquaticum</i> |         | <i>Chironomus riparius</i> |
| S-Europe     | 37.402 | 0.037                      | 0.031                      | 0.005                | 0.025                | 0.012                                  | 0.005                         | 944.972 | 0.012                      |

AF: Assessment factor; PEC: Predicted environmental concentration; RAC: Regulatory acceptable concentration; PEC/RAC ratios above the relevant trigger of 1 are shown in **bold**

<sup>1</sup> covering all corresponding uses in pome/stone fruit and olives

**Aquatic organisms: acceptability of risk (PEC/RAC < 1) for AMPA for each organism group based on FOCUS Steps 1, 2 and 3 calculations for the use of MON 52276 in vines (3 × 720 g a.s./ha, with application interval of 28 days). Uses 5 a-c.**

| Group                                            |                              | Fish acute                 | Fish prolonged             | Inverteb. acute            | Inverteb. prolonged  | Algae                                   | Aquatic macrophytes                     |                                | Sed. dwell. prolonged      |
|--------------------------------------------------|------------------------------|----------------------------|----------------------------|----------------------------|----------------------|-----------------------------------------|-----------------------------------------|--------------------------------|----------------------------|
| Test species                                     |                              | <i>Oncorhynchus mykiss</i> | <i>Pimephales promelas</i> | <i>Daphnia magna</i>       | <i>Daphnia magna</i> | <i>Pseudokirchneriella subcapitata</i>  | <i>Myriophyllum aquaticum</i>           |                                | <i>Chironomus riparius</i> |
| Endpoint (µg/L)                                  |                              | LC <sub>50</sub><br>100000 | NOEC<br>12000              | EC <sub>50</sub><br>690000 | NOEC<br>15000        | E <sub>r</sub> C <sub>50</sub><br>31900 | E <sub>r</sub> C <sub>50</sub><br>72000 | Endpoint (µg/kg)               | NOEC<br>786500             |
| AF                                               |                              | 100                        | 10                         | 100                        | 10                   | 10                                      | 10                                      | AF                             | 10                         |
| RAC (µg/L)                                       |                              | 1000                       | 1200                       | 6900                       | 1500                 | 3190                                    | 7200                                    | RAC (µg/kg)                    | 78650                      |
| FOCUS Scenario                                   | PEC <sub>sw,max</sub> (µg/L) |                            |                            |                            |                      |                                         |                                         | PEC <sub>sed,max</sub> (µg/kg) |                            |
| <b>Step 1 (DT<sub>50</sub> wat/sed = 89.9 d)</b> |                              |                            |                            |                            |                      |                                         |                                         |                                |                            |
|                                                  | 100.494                      | 0.100                      | 0.084                      | 0.015                      | 0.067                | 0.032                                   | 0.014                                   | 2470                           | 0.031                      |
| <b>Step 2 (DT<sub>50</sub> wat/sed = 89.9 d)</b> |                              |                            |                            |                            |                      |                                         |                                         |                                |                            |

**Aquatic organisms: acceptability of risk (PEC/RAC < 1) for AMPA for each organism group based on FOCUS Steps 1, 2 and 3 calculations for the use of MON 52276 in vines (3 × 720 g a.s./ha, with application interval of 28 days). Uses 5 a-c.**

| Group        |        | Fish acute                 | Fish prolonged             | Inverteb. acute      | Inverteb. prolonged  | Algae                                  | Aquatic macrophytes           |         | Sed. dwell. prolonged      |
|--------------|--------|----------------------------|----------------------------|----------------------|----------------------|----------------------------------------|-------------------------------|---------|----------------------------|
| Test species |        | <i>Oncorhynchus mykiss</i> | <i>Pimephales promelas</i> | <i>Daphnia magna</i> | <i>Daphnia magna</i> | <i>Pseudokirchneriella subcapitata</i> | <i>Myriophyllum aquaticum</i> |         | <i>Chironomus riparius</i> |
| N-Europe     | 46.595 | 0.047                      | 0.039                      | 0.007                | 0.031                | 0.015                                  | 0.006                         | 1180    | 0.015                      |
| S-Europe     | 37.402 | 0.037                      | 0.031                      | 0.005                | 0.025                | 0.012                                  | 0.005                         | 944.972 | 0.012                      |

AF: Assessment factor; PEC: Predicted environmental concentration; RAC: Regulatory acceptable concentration; PEC/RAC ratios above the relevant trigger of 1 are shown in **bold**

**Aquatic organisms: acceptability of risk (PEC/RAC < 1) for HMPA for each organism group based on FOCUS Steps 1, 2 and 3 calculations for the use of MON 52276 in field crops<sup>1</sup> (3 × 720 g a.s./ha, with application interval of 28 days). Uses 2 a-c.**

| Group           |                              | Fish acute                | Inverteb. acute            | Algae                                    | Aquatic macrophytes                      |                                | Sed. dwell. prolonged                   |
|-----------------|------------------------------|---------------------------|----------------------------|------------------------------------------|------------------------------------------|--------------------------------|-----------------------------------------|
| Test species    |                              | -                         | <i>Daphnia magna</i>       | <i>Pseudokirchneriella subcapitata</i>   | <i>Lemna gibba</i>                       |                                | <i>Chironomus riparius</i> <sup>§</sup> |
| Endpoint (µg/L) |                              | LC <sub>50</sub><br>32000 | EC <sub>50</sub><br>100000 | E <sub>r</sub> C <sub>50</sub><br>120000 | E <sub>r</sub> C <sub>50</sub><br>123000 | Endpoint (µg/kg)               | NOEC<br>15400 µg/kg sed.                |
| AF              |                              | 100                       | 100                        | 10                                       | 10                                       | AF                             | 10                                      |
| RAC (µg/L)      |                              | 320                       | 1000                       | 12000                                    | 12300                                    | RAC (µg/kg)                    | 1540 µg/kg sed.                         |
| FOCUS Scenario  | PEC <sub>sw,max</sub> (µg/L) |                           |                            |                                          |                                          | PEC <sub>sed,max</sub> (µg/kg) |                                         |
| <b>Step 1</b>   |                              |                           |                            |                                          |                                          |                                |                                         |
|                 | 48.385                       | 0.151                     | 0.048                      | 0.004                                    | 0.004                                    | 341.71                         | 0.222                                   |
| <b>Step 2</b>   |                              |                           |                            |                                          |                                          |                                |                                         |
| N-Europe        | 21.541                       | 0.067                     | 0.022                      | 0.002                                    | 0.002                                    | 152.17                         | 0.099                                   |

**Aquatic organisms: acceptability of risk (PEC/RAC < 1) for HMPA for each organism group based on FOCUS Steps 1, 2 and 3 calculations for the use of MON 52276 in field crops<sup>1</sup> (3 × 720 g a.s./ha, with application interval of 28 days). Uses 2 a-c.**

| Group        |        | Fish acute | Inverteb. acute      | Algae                                  | Aquatic macrophytes |        | Sed. dwell. prolonged                   |
|--------------|--------|------------|----------------------|----------------------------------------|---------------------|--------|-----------------------------------------|
| Test species |        | -          | <i>Daphnia magna</i> | <i>Pseudokirchneriella subcapitata</i> | <i>Lemna gibba</i>  |        | <i>Chironomus riparius</i> <sup>§</sup> |
| S-Europe     | 17.420 | 0.054      | 0.017                | 0.001                                  | 0.001               | 123.05 | 0.080                                   |

AF: Assessment factor; PEC: Predicted environmental concentration; RAC: Regulatory acceptable concentration; PEC/RAC ratios above the relevant trigger of 1 are shown in **bold**

<sup>1</sup> covering all corresponding uses in root vegetables, potatoes, bulb vegetables, fruiting vegetables, leafy vegetables and sugar beets

<sup>§</sup> added following open point of section 4 (expert consultation 4.2): “RMS to update the PEC sediment calculations for HMPA using a default Koc value of 10000 mL/g and to include the metabolite HMPA in the residue definition for sediment in both an update to the RAR and the list of endpoints.” As worst case the metabolite was considered 10 times more toxic than glyphosate.

**Aquatic organisms: acceptability of risk (PEC/RAC < 1) for HMPA for each organism group based on FOCUS Steps 1, 2 and 3 calculations for the use of MON 52276 in orchards<sup>1</sup> (3 × 720 g a.s./ha, with application interval of 28 days). Uses 4 a-c.**

| Group           |                              | Fish acute                | Inverteb. acute            | Algae                                    | Aquatic macrophytes                      |                                | Sed. dwell. prolonged                   |
|-----------------|------------------------------|---------------------------|----------------------------|------------------------------------------|------------------------------------------|--------------------------------|-----------------------------------------|
| Test species    |                              | -                         | <i>Daphnia magna</i>       | <i>Pseudokirchneriella subcapitata</i>   | <i>Lemna gibba</i>                       |                                | <i>Chironomus riparius</i> <sup>§</sup> |
| Endpoint (µg/L) |                              | LC <sub>50</sub><br>32000 | EC <sub>50</sub><br>100000 | E <sub>r</sub> C <sub>50</sub><br>120000 | E <sub>r</sub> C <sub>50</sub><br>123000 | Endpoint (µg/kg)               | NOEC<br>15400 µg/kg sed.                |
| AF              |                              | 100                       | 100                        | 10                                       | 10                                       | AF                             | 10                                      |
| RAC (µg/L)      |                              | 320                       | 1000                       | 12000                                    | 12300                                    | RAC (µg/kg)                    | 1540 µg/kg sed.                         |
| FOCUS Scenario  | PEC <sub>sw,max</sub> (µg/L) |                           |                            |                                          |                                          | PEC <sub>sed,max</sub> (µg/kg) |                                         |
| <b>Step 1</b>   |                              |                           |                            |                                          |                                          |                                |                                         |
|                 | 48.385                       | 0.151                     | 0.048                      | 0.004                                    | 0.004                                    | 341.71                         | 0.222                                   |
| <b>Step 2</b>   |                              |                           |                            |                                          |                                          |                                |                                         |

**Aquatic organisms: acceptability of risk (PEC/RAC < 1) for HMPA for each organism group based on FOCUS Steps 1, 2 and 3 calculations for the use of MON 52276 in orchards<sup>1</sup> (3 × 720 g a.s./ha, with application interval of 28 days). Uses 4 a-c.**

| Group        |        | Fish acute | Inverteb. acute      | Algae                                  | Aquatic macrophytes |        | Sed. dwell. prolonged                   |
|--------------|--------|------------|----------------------|----------------------------------------|---------------------|--------|-----------------------------------------|
| Test species |        | -          | <i>Daphnia magna</i> | <i>Pseudokirchneriella subcapitata</i> | <i>Lemna gibba</i>  |        | <i>Chironomus riparius</i> <sup>§</sup> |
| N-Europe     | 21.541 | 0.067      | 0.022                | 0.002                                  | 0.002               | 152.17 | 0.099                                   |
| S-Europe     | 17.420 | 0.054      | 0.017                | 0.001                                  | 0.001               | 123.05 | 0.080                                   |

AF: Assessment factor; PEC: Predicted environmental concentration; RAC: Regulatory acceptable concentration; PEC/RAC ratios above the relevant trigger of 1 are shown in **bold**

<sup>1</sup> covering all corresponding uses in pome/stone fruit and olives

<sup>§</sup> added following open point of section 4 (expert consultation 4.2): “RMS to update the PEC sediment calculations for HMPA using a default Koc value of 10000 mL/g and to include the metabolite HMPA in the residue definition for sediment in both an update to the RAR and the list of endpoints.” As worst case the metabolite was considered 10 times more toxic than glyphosate.

**Aquatic organisms: acceptability of risk (PEC/RAC < 1) for HMPA for each organism group based on FOCUS Steps 1, 2 and 3 calculations for the use of MON 52276 in vines (3 × 720 g a.s./ha, with application interval of 28 days). Uses 5 a-c.**

| Group           |                              | Fish acute                | Inverteb. acute            | Algae                                    | Aquatic macrophytes                      |                                | Sed. dwell. prolonged                   |
|-----------------|------------------------------|---------------------------|----------------------------|------------------------------------------|------------------------------------------|--------------------------------|-----------------------------------------|
| Test species    |                              | -                         | <i>Daphnia magna</i>       | <i>Pseudokirchneriella subcapitata</i>   | <i>Lemna gibba</i>                       |                                | <i>Chironomus riparius</i> <sup>§</sup> |
| Endpoint (µg/L) |                              | LC <sub>50</sub><br>32000 | EC <sub>50</sub><br>100000 | E <sub>r</sub> C <sub>50</sub><br>120000 | E <sub>r</sub> C <sub>50</sub><br>123000 | Endpoint (µg/kg)               | NOEC<br>15400 µg/kg sed.                |
| AF              |                              | 100                       | 100                        | 10                                       | 10                                       | AF                             | 10                                      |
| RAC (µg/L)      |                              | 320                       | 1000                       | 12000                                    | 12300                                    | RAC (µg/kg)                    | 1540 µg/kg sed.                         |
| FOCUS Scenario  | PEC <sub>sw,max</sub> (µg/L) |                           |                            |                                          |                                          | PEC <sub>sed,max</sub> (µg/kg) |                                         |
| <b>Step 1</b>   |                              |                           |                            |                                          |                                          |                                |                                         |

**Aquatic organisms: acceptability of risk (PEC/RAC < 1) for HMPA for each organism group based on FOCUS Steps 1, 2 and 3 calculations for the use of MON 52276 in vines (3 × 720 g a.s./ha, with application interval of 28 days). Uses 5 a-c.**

| Group         |        | Fish acute | Inverteb. acute      | Algae                                  | Aquatic macrophytes |        | Sed. dwell. prolonged                    |
|---------------|--------|------------|----------------------|----------------------------------------|---------------------|--------|------------------------------------------|
| Test species  |        | -          | <i>Daphnia magna</i> | <i>Pseudokirchneriella subcapitata</i> | <i>Lemna gibba</i>  |        | <i>Chironomus riparius</i> <sup>\$</sup> |
|               | 48.385 | 0.151      | 0.048                | 0.004                                  | 0.004               | 341.71 | 0.222                                    |
| <b>Step 2</b> |        |            |                      |                                        |                     |        |                                          |
| N-Europe      | 21.541 | 0.067      | 0.022                | 0.002                                  | 0.002               | 152.17 | 0.099                                    |
| S-Europe      | 17.420 | 0.054      | 0.017                | 0.001                                  | 0.001               | 123.05 | 0.080                                    |

AF: Assessment factor; PEC: Predicted environmental concentration; RAC: Regulatory acceptable concentration; PEC/RAC ratios above the relevant trigger of 1 are shown in **bold**

<sup>\$</sup> added following open point of section 4 (expert consultation 4.2): “RMS to update the PEC sediment calculations for HMPA using a default Koc value of 10000 mL/g and to include the metabolite HMPA in the residue definition for sediment in both an update to the RAR and the list of endpoints.” As worst case the metabolite was considered 10 times more toxic than glyphosate.

**Aquatic organisms: acceptability of risk (PEC/RAC < 1) for P1a and M3.3 for sediment dwellers based on FOCUS Steps 1, 2 and 3 calculations for the use of MON 52276 in field crops<sup>1</sup> (3 × 720 g a.s./ha, with application interval of 28 days). Uses 2 a-c.**

|                 |                                |                            |
|-----------------|--------------------------------|----------------------------|
| Group           |                                | Sed. dwell. prolonged      |
| Test species    |                                | <i>Chironomus riparius</i> |
| Endpoint (µg/L) |                                | NOEC*<br>78650             |
| AF              |                                | 10                         |
| RAC (µg/L)      |                                | 7865                       |
| FOCUS Scenario  | PEC <sub>sed,max</sub> (µg/kg) |                            |
| <b>Step 1</b>   |                                |                            |

**Aquatic organisms: acceptability of risk (PEC/RAC < 1) for P1a and M3.3 for sediment dwellers based on FOCUS Steps 1, 2 and 3 calculations for the use of MON 52276 in field crops<sup>1</sup> (3 × 720 g a.s./ha, with application interval of 28 days). Uses 2 a-c.**

| Group         |         | Sed. dwell. prolonged      |
|---------------|---------|----------------------------|
| Test species  |         | <i>Chironomus riparius</i> |
|               | 549.077 | 0.070                      |
| <b>Step 2</b> |         |                            |
| N-Europe      | 244.491 | 0.031                      |
| S-Europe      | 197.709 | 0.025                      |

AF: Assessment factor; PEC: Predicted environmental concentration; RAC: Regulatory acceptable concentration; PEC/RAC ratios above the relevant trigger of 1 are shown in **bold**

<sup>1</sup> covering all corresponding uses in root vegetables, potatoes, bulb vegetables, fruiting vegetables, leafy vegetables and sugar beets

\* considered ten times more toxic than AMPA

**Aquatic organisms: acceptability of risk (PEC/RAC < 1) for P1a and M3.3 for sediment dwellers based on FOCUS Steps 1, 2 and 3 calculations for the use of MON 52276 in orchards<sup>1</sup> (3 × 720 g a.s./ha, with application interval of 28 days). Uses 4 a-c.**

| Group           |                                | Sed. dwell. prolonged      |
|-----------------|--------------------------------|----------------------------|
| Test species    |                                | <i>Chironomus riparius</i> |
| Endpoint (µg/L) | Endpoint (µg/kg)               | NOEC*                      |
|                 |                                | 78650                      |
| AF              | AF                             | 10                         |
| RAC (µg/L)      | RAC (µg/kg)                    | 7865                       |
| FOCUS Scenario  | PEC <sub>sed,max</sub> (µg/kg) |                            |
| <b>Step 1</b>   |                                |                            |
|                 | 549.077                        | 0.070                      |
| <b>Step 2</b>   |                                |                            |

**Aquatic organisms: acceptability of risk (PEC/RAC < 1) for P1a and M3.3 for sediment dwellers based on FOCUS Steps 1, 2 and 3 calculations for the use of MON 52276 in orchards<sup>1</sup> (3 × 720 g a.s./ha, with application interval of 28 days). Uses 4 a-c.**

| Group        |         | Sed. dwell. prolonged      |
|--------------|---------|----------------------------|
| Test species |         | <i>Chironomus riparius</i> |
| N-Europe     | 244.491 | 0.031                      |
| S-Europe     | 197.709 | 0.025                      |

AF: Assessment factor; PEC: Predicted environmental concentration; RAC: Regulatory acceptable concentration; PEC/RAC ratios above the relevant trigger of 1 are shown in **bold**

<sup>1</sup> covering all corresponding uses in pome/stone fruit and olives

\* considered ten times more toxic than AMPA

**Aquatic organisms: acceptability of risk (PEC/RAC < 1) for P1a and M3.3 for sediment dwellers based on FOCUS Steps 1, 2 and 3 calculations for the use of MON 52276 in vines (3 × 720 g a.s./ha, with application interval of 28 days). Uses 5 a-c.**

| Group           |                                | Sed. dwell. prolonged      |
|-----------------|--------------------------------|----------------------------|
| Test species    |                                | <i>Chironomus riparius</i> |
| Endpoint (µg/L) | Endpoint (µg/kg)               | NOEC*                      |
|                 |                                | 78650                      |
| AF              | AF                             | 10                         |
| RAC (µg/L)      | RAC (µg/kg)                    | 7865                       |
| FOCUS Scenario  | PEC <sub>sed,max</sub> (µg/kg) |                            |
| <b>Step 1</b>   |                                |                            |
|                 | 549.077                        | 0.070                      |
| <b>Step 2</b>   |                                |                            |
| N-Europe        | 244.491                        | 0.031                      |
| S-Europe        | 197.709                        | 0.025                      |



**Aquatic organisms: acceptability of risk (PEC/RAC < 1) for P1a and M3.3 for sediment dwellers based on FOCUS Steps 1, 2 and 3 calculations for the use of MON 52276 in vines (3 × 720 g a.s./ha, with application interval of 28 days). Uses 5 a-c.**

|                     |  |                              |
|---------------------|--|------------------------------|
| <b>Group</b>        |  | <b>Sed. dwell. prolonged</b> |
| <b>Test species</b> |  | <i>Chironomus riparius</i>   |

AF: Assessment factor; PEC: Predicted environmental concentration; RAC: Regulatory acceptable concentration; PEC/RAC ratios above the relevant trigger of 1 are shown in **bold**

\* considered ten times more toxic than AMPA

**Aquatic organisms: acceptability of risk (PEC/RAC < 1) for Glyphosate for each organism group based on FOCUS Steps 1, 2 and 3 calculations for the use of MON 52276 in vegetables, root (2 × 1080 g a.s./ha, with application interval of 28 days). Uses 2 a-c.**

| Group                    |                              | Fish acute                 | Fish prolonged           | Inverteb. acute                                 | Inverteb. prolonged  | Algae                       | Aquatic macrophytes           |                                | Sed. dwell. prolonged      |
|--------------------------|------------------------------|----------------------------|--------------------------|-------------------------------------------------|----------------------|-----------------------------|-------------------------------|--------------------------------|----------------------------|
| Test species             |                              | <i>Lepomis macrochirus</i> | <i>Brachydanio rerio</i> | <i>Crassostrea gigas</i> / <i>Daphnia magna</i> | <i>Daphnia magna</i> | <i>Skeletonema costatum</i> | <i>Myriophyllum aquaticum</i> |                                | <i>Chironomus riparius</i> |
| Endpoint (µg/L)          |                              | LC <sub>50</sub><br>32000  | NOEC<br>1000             | EC <sub>50</sub><br>40000                       | NOEC<br>12500        | ErC <sub>50</sub><br>13500  | ErC <sub>50</sub><br>10330    | Endpoint (µg/kg)               | NOEC<br>154000             |
| AF                       |                              | 100                        | 10                       | 100                                             | 10                   | 10                          | 10                            | AF                             | 10                         |
| RAC (µg/L)               |                              | 320                        | 100                      | 400                                             | 1250                 | 1350                        | 1033                          | RAC (µg/kg)                    | 15400                      |
| FOCUS Scenario           | PEC <sub>sw,max</sub> (µg/L) |                            |                          |                                                 |                      |                             |                               | PEC <sub>sed,max</sub> (µg/kg) |                            |
| <b>Step 1</b>            |                              |                            |                          |                                                 |                      |                             |                               |                                |                            |
|                          | 125.789                      | 0.393                      | <b>1.258</b>             | 0.314                                           | 0.101                | 0.093                       | 0.122                         | 4710                           | 0.306                      |
| <b>Step 2</b>            |                              |                            |                          |                                                 |                      |                             |                               |                                |                            |
| N-Europe                 | 52.461                       | 0.164                      | 0.525                    | 0.131                                           | 0.042                | 0.039                       | 0.051                         | 2230                           | 0.145                      |
| S-Europe                 | 42.640                       | 0.133                      | 0.426                    | 0.107                                           | 0.034                | 0.032                       | 0.041                         | 1800                           | 0.117                      |
| <b>Step 3</b>            |                              |                            |                          |                                                 |                      |                             |                               |                                |                            |
| D3/ditch                 | 6.745                        | 0.021                      | 0.067                    | 0.017                                           | 0.005                | 0.005                       | 0.007                         | 7.755                          | 0.001                      |
| D6/ditch                 | 6.763                        | 0.021                      | 0.068                    | 0.017                                           | 0.005                | 0.005                       | 0.007                         | 26.970                         | 0.002                      |
| R1/pond                  | 1.814                        | 0.006                      | 0.018                    | 0.005                                           | 0.001                | 0.001                       | 0.002                         | 66.350                         | 0.004                      |
| R1/stream                | 4.445                        | 0.014                      | 0.044                    | 0.011                                           | 0.004                | 0.003                       | 0.004                         | 363.300                        | 0.024                      |
| R2/stream                | 5.967                        | 0.019                      | 0.060                    | 0.015                                           | 0.005                | 0.004                       | 0.006                         | 1866                           | 0.121                      |
| R2/stream <sub>2nd</sub> | 5.967                        | 0.019                      | 0.060                    | 0.015                                           | 0.005                | 0.004                       | 0.006                         | 2078.800                       | 0.135                      |

**Aquatic organisms: acceptability of risk (PEC/RAC < 1) for Glyphosate for each organism group based on FOCUS Steps 1, 2 and 3 calculations for the use of MON 52276 in vegetables, root (2 × 1080 g a.s./ha, with application interval of 28 days). Uses 2 a-c.**

| Group        |       | Fish acute                 | Fish prolonged           | Inverteb. acute                          | Inverteb. prolonged  | Algae                       | Aquatic macrophytes           |         | Sed. dwell. prolonged      |
|--------------|-------|----------------------------|--------------------------|------------------------------------------|----------------------|-----------------------------|-------------------------------|---------|----------------------------|
| Test species |       | <i>Lepomis macrochirus</i> | <i>Brachydanio rerio</i> | <i>Crassostrea gigas / Daphnia magna</i> | <i>Daphnia magna</i> | <i>Skeletonema costatum</i> | <i>Myriophyllum aquaticum</i> |         | <i>Chironomus riparius</i> |
| R3/stream    | 6.277 | 0.020                      | 0.063                    | 0.016                                    | 0.005                | 0.005                       | 0.006                         | 268.800 | 0.017                      |
| R4/stream    | 5.145 | 0.016                      | 0.051                    | 0.013                                    | 0.004                | 0.004                       | 0.005                         | 594.800 | 0.039                      |

AF: Assessment factor; PEC: Predicted environmental concentration; RAC: Regulatory acceptable concentration; PEC/RAC ratios above the relevant trigger of 1 are shown in **bold**

**Aquatic organisms: acceptability of risk (PEC/RAC < 1) for Glyphosate for each organism group based on FOCUS Steps 1, 2 and 3 calculations for the use of MON 52276 in potatoes (2 × 1080 g a.s./ha, with application interval of 28 days). Uses 2 a-c.**

| Group           |                              | Fish acute                 | Fish prolonged           | Inverteb. acute                          | Inverteb. prolonged  | Algae                       | Aquatic macrophytes           |                                | Sed. dwell. prolonged      |
|-----------------|------------------------------|----------------------------|--------------------------|------------------------------------------|----------------------|-----------------------------|-------------------------------|--------------------------------|----------------------------|
| Test species    |                              | <i>Lepomis macrochirus</i> | <i>Brachydanio rerio</i> | <i>Crassostrea gigas / Daphnia magna</i> | <i>Daphnia magna</i> | <i>Skeletonema costatum</i> | <i>Myriophyllum aquaticum</i> |                                | <i>Chironomus riparius</i> |
| Endpoint (µg/L) |                              | LC <sub>50</sub><br>32000  | NOEC<br>1000             | EC <sub>50</sub><br>40000                | NOEC<br>12500        | ErC <sub>50</sub><br>13500  | ErC <sub>50</sub><br>10330    | Endpoint (µg/kg)               | NOEC<br>154000             |
| AF              |                              | 100                        | 10                       | 100                                      | 10                   | 10                          | 10                            | AF                             | 10                         |
| RAC (µg/L)      |                              | 320                        | 100                      | 400                                      | 1250                 | 1350                        | 1033                          | RAC (µg/kg)                    | 15400                      |
| FOCUS Scenario  | PEC <sub>sw,max</sub> (µg/L) |                            |                          |                                          |                      |                             |                               | PEC <sub>sed,max</sub> (µg/kg) |                            |
| <b>Step 1</b>   |                              |                            |                          |                                          |                      |                             |                               |                                |                            |
|                 | 125.789                      | 0.393                      | <b>1.258</b>             | 0.314                                    | 0.101                | 0.093                       | 0.122                         | 4710                           | 0.306                      |

**Aquatic organisms: acceptability of risk (PEC/RAC < 1) for Glyphosate for each organism group based on FOCUS Steps 1, 2 and 3 calculations for the use of MON 52276 in potatoes (2 × 1080 g a.s./ha, with application interval of 28 days). Uses 2 a-c.**

| Group                    |        | Fish acute                 | Fish prolonged           | Inverteb. acute                                 | Inverteb. prolonged  | Algae                       | Aquatic macrophytes           |          | Sed. dwell. prolonged      |
|--------------------------|--------|----------------------------|--------------------------|-------------------------------------------------|----------------------|-----------------------------|-------------------------------|----------|----------------------------|
| Test species             |        | <i>Lepomis macrochirus</i> | <i>Brachydanio rerio</i> | <i>Crassostrea gigas</i> / <i>Daphnia magna</i> | <i>Daphnia magna</i> | <i>Skeletonema costatum</i> | <i>Myriophyllum aquaticum</i> |          | <i>Chironomus riparius</i> |
| <b>Step 2</b>            |        |                            |                          |                                                 |                      |                             |                               |          |                            |
| N-Europe                 | 52.461 | 0.164                      | 0.525                    | 0.131                                           | 0.042                | 0.039                       | 0.051                         | 2230     | 0.145                      |
| S-Europe                 | 42.640 | 0.133                      | 0.426                    | 0.107                                           | 0.034                | 0.032                       | 0.041                         | 1800     | 0.117                      |
| <b>Step 3</b>            |        |                            |                          |                                                 |                      |                             |                               |          |                            |
| D3/ditch                 | 5.558  | 0.017                      | 0.056                    | 0.014                                           | 0.004                | 0.004                       | 0.005                         | 5.498    | 0.000                      |
| D4/pond                  | 0.249  | 0.001                      | 0.002                    | 0.001                                           | 0.000                | 0.000                       | 0.000                         | 6.620    | 0.000                      |
| D4/stream                | 4.728  | 0.015                      | 0.047                    | 0.012                                           | 0.004                | 0.004                       | 0.005                         | 0.809    | 0.000                      |
| D6/ditch                 | 5.596  | 0.017                      | 0.056                    | 0.014                                           | 0.004                | 0.004                       | 0.005                         | 11.610   | 0.001                      |
| D6/ditch 2 <sup>nd</sup> | 5.613  | 0.018                      | 0.056                    | 0.014                                           | 0.004                | 0.004                       | 0.005                         | 20.590   | 0.001                      |
| R1/pond                  | 2.094  | 0.007                      | 0.021                    | 0.005                                           | 0.002                | 0.002                       | 0.002                         | 78.100   | 0.005                      |
| R1/stream                | 4.127  | 0.013                      | 0.041                    | 0.010                                           | 0.003                | 0.003                       | 0.004                         | 451.300  | 0.029                      |
| R2/stream                | 5.174  | 0.016                      | 0.052                    | 0.013                                           | 0.004                | 0.004                       | 0.005                         | 1741.800 | 0.113                      |
| R3/stream                | 5.442  | 0.017                      | 0.054                    | 0.014                                           | 0.004                | 0.004                       | 0.005                         | 885.300  | 0.057                      |

AF: Assessment factor; PEC: Predicted environmental concentration; RAC: Regulatory acceptable concentration; PEC/RAC ratios above the relevant trigger of 1 are shown in **bold**

**Aquatic organisms: acceptability of risk (PEC/RAC < 1) for Glyphosate for each organism group based on FOCUS Steps 1, 2 and 3 calculations for the use of MON 52276 in vegetables, bulb (2 × 1080 g a.s./ha, with application interval of 28 days). Uses 2 a-c.**

| Group                       |                              | Fish acute                 | Fish prolonged           | Inverteb. acute                                 | Inverteb. prolonged  | Algae                       | Aquatic macrophytes           |                                | Sed. dwell. prolonged      |
|-----------------------------|------------------------------|----------------------------|--------------------------|-------------------------------------------------|----------------------|-----------------------------|-------------------------------|--------------------------------|----------------------------|
| Test species                |                              | <i>Lepomis macrochirus</i> | <i>Brachydanio rerio</i> | <i>Crassostrea gigas</i> / <i>Daphnia magna</i> | <i>Daphnia magna</i> | <i>Skeletonema costatum</i> | <i>Myriophyllum aquaticum</i> |                                | <i>Chironomus riparius</i> |
| Endpoint (µg/L)             |                              | LC <sub>50</sub><br>32000  | NOEC<br>1000             | EC <sub>50</sub><br>40000                       | NOEC<br>12500        | ErC <sub>50</sub><br>13500  | ErC <sub>50</sub><br>10330    | Endpoint (µg/kg)               | NOEC<br>154000             |
| AF                          |                              | 100                        | 10                       | 100                                             | 10                   | 10                          | 10                            | AF                             | 10                         |
| RAC (µg/L)                  |                              | 320                        | 100                      | 400                                             | 1250                 | 1350                        | 1033                          | RAC (µg/kg)                    | 15400                      |
| FOCUS Scenario              | PEC <sub>sw,max</sub> (µg/L) |                            |                          |                                                 |                      |                             |                               | PEC <sub>sed,max</sub> (µg/kg) |                            |
| <b>Step 1</b>               |                              |                            |                          |                                                 |                      |                             |                               |                                |                            |
|                             | 125.789                      | 0.393                      | <b>1.258</b>             | 0.314                                           | 0.101                | 0.093                       | 0.122                         | 4710                           | 0.306                      |
| <b>Step 2</b>               |                              |                            |                          |                                                 |                      |                             |                               |                                |                            |
| N-Europe                    | 52.461                       | 0.164                      | 0.525                    | 0.131                                           | 0.042                | 0.039                       | 0.051                         | 2230                           | 0.145                      |
| S-Europe                    | 42.640                       | 0.133                      | 0.426                    | 0.107                                           | 0.034                | 0.032                       | 0.041                         | 1800                           | 0.117                      |
| <b>Step 3</b>               |                              |                            |                          |                                                 |                      |                             |                               |                                |                            |
| D3/ditch                    | 6.721                        | 0.021                      | 0.067                    | 0.017                                           | 0.005                | 0.005                       | 0.007                         | 6.134                          | 0.000                      |
| D4/pond                     | 0.257                        | 0.001                      | 0.003                    | 0.001                                           | 0.000                | 0.000                       | 0.000                         | 6.862                          | 0.000                      |
| D4/stream                   | 5.314                        | 0.017                      | 0.053                    | 0.013                                           | 0.004                | 0.004                       | 0.005                         | 0.819                          | 0.000                      |
| D6/ditch                    | 6.793                        | 0.021                      | 0.068                    | 0.017                                           | 0.005                | 0.005                       | 0.007                         | 35.160                         | 0.002                      |
| D6/ditch<br>2 <sup>nd</sup> | 6.793                        | 0.021                      | 0.068                    | 0.017                                           | 0.005                | 0.005                       | 0.007                         | 35.060                         | 0.002                      |
| R1/pond                     | 2.014                        | 0.006                      | 0.020                    | 0.005                                           | 0.002                | 0.001                       | 0.002                         | 74.010                         | 0.005                      |

**Aquatic organisms: acceptability of risk (PEC/RAC < 1) for Glyphosate for each organism group based on FOCUS Steps 1, 2 and 3 calculations for the use of MON 52276 in vegetables, bulb (2 × 1080 g a.s./ha, with application interval of 28 days). Uses 2 a-c.**

| Group        |       | Fish acute                 | Fish prolonged           | Inverteb. acute                          | Inverteb. prolonged  | Algae                       | Aquatic macrophytes           |          | Sed. dwell. prolonged      |
|--------------|-------|----------------------------|--------------------------|------------------------------------------|----------------------|-----------------------------|-------------------------------|----------|----------------------------|
| Test species |       | <i>Lepomis macrochirus</i> | <i>Brachydanio rerio</i> | <i>Crassostrea gigas / Daphnia magna</i> | <i>Daphnia magna</i> | <i>Skeletonema costatum</i> | <i>Myriophyllum aquaticum</i> |          | <i>Chironomus riparius</i> |
| R1/stream    | 4.445 | 0.014                      | 0.044                    | 0.011                                    | 0.004                | 0.003                       | 0.004                         | 452.900  | 0.029                      |
| R2/stream    | 5.967 | 0.019                      | 0.060                    | 0.015                                    | 0.005                | 0.004                       | 0.006                         | 1869.200 | 0.121                      |
| R3/stream    | 6.276 | 0.020                      | 0.063                    | 0.016                                    | 0.005                | 0.005                       | 0.006                         | 472.400  | 0.031                      |
| R4/stream    | 5.300 | 0.017                      | 0.053                    | 0.013                                    | 0.004                | 0.004                       | 0.005                         | 382.300  | 0.025                      |

AF: Assessment factor; PEC: Predicted environmental concentration; RAC: Regulatory acceptable concentration; PEC/RAC ratios above the relevant trigger of 1 are shown in **bold**

**Aquatic organisms: acceptability of risk (PEC/RAC < 1) for Glyphosate for each organism group based on FOCUS Steps 1, 2 and 3 calculations for the use of MON 52276 in vegetables, fruiting (2 × 1080 g a.s./ha, with application interval of 28 days). Uses 2 a-c.**

| Group           |                              | Fish acute                 | Fish prolonged           | Inverteb. acute                          | Inverteb. prolonged  | Algae                       | Aquatic macrophytes           |                                | Sed. dwell. prolonged      |
|-----------------|------------------------------|----------------------------|--------------------------|------------------------------------------|----------------------|-----------------------------|-------------------------------|--------------------------------|----------------------------|
| Test species    |                              | <i>Lepomis macrochirus</i> | <i>Brachydanio rerio</i> | <i>Crassostrea gigas / Daphnia magna</i> | <i>Daphnia magna</i> | <i>Skeletonema costatum</i> | <i>Myriophyllum aquaticum</i> |                                | <i>Chironomus riparius</i> |
| Endpoint (µg/L) |                              | LC <sub>50</sub><br>32000  | NOEC<br>1000             | EC <sub>50</sub><br>40000                | NOEC<br>12500        | ErC <sub>50</sub><br>13500  | ErC <sub>50</sub><br>10330    | <b>Endpoint (µg/kg)</b>        | NOEC<br>154000             |
| AF              |                              | 100                        | 10                       | 100                                      | 10                   | 10                          | 10                            | <b>AF</b>                      | 10                         |
| RAC (µg/L)      |                              | 320                        | 100                      | 400                                      | 1250                 | 1350                        | 1033                          | <b>RAC (µg/kg)</b>             | 15400                      |
| FOCUS Scenario  | PEC <sub>sw,max</sub> (µg/L) |                            |                          |                                          |                      |                             |                               | PEC <sub>sed,max</sub> (µg/kg) |                            |

**Aquatic organisms: acceptability of risk (PEC/RAC < 1) for Glyphosate for each organism group based on FOCUS Steps 1, 2 and 3 calculations for the use of MON 52276 in vegetables, fruiting (2 × 1080 g a.s./ha, with application interval of 28 days). Uses 2 a-c.**

| Group         |         | Fish acute                 | Fish prolonged           | Inverteb. acute                          | Inverteb. prolonged  | Algae                       | Aquatic macrophytes           |          | Sed. dwell. prolonged      |
|---------------|---------|----------------------------|--------------------------|------------------------------------------|----------------------|-----------------------------|-------------------------------|----------|----------------------------|
| Test species  |         | <i>Lepomis macrochirus</i> | <i>Brachydanio rerio</i> | <i>Crassostrea gigas / Daphnia magna</i> | <i>Daphnia magna</i> | <i>Skeletonema costatum</i> | <i>Myriophyllum aquaticum</i> |          | <i>Chironomus riparius</i> |
| <b>Step 1</b> |         |                            |                          |                                          |                      |                             |                               |          |                            |
|               | 125.789 | 0.393                      | <b>1.258</b>             | 0.314                                    | 0.101                | 0.093                       | 0.122                         | 4710     | 0.306                      |
| <b>Step 2</b> |         |                            |                          |                                          |                      |                             |                               |          |                            |
| N-Europe      | 52.461  | 0.164                      | 0.525                    | 0.131                                    | 0.042                | 0.039                       | 0.051                         | 2230     | 0.145                      |
| S-Europe      | 42.640  | 0.133                      | 0.426                    | 0.107                                    | 0.034                | 0.032                       | 0.041                         | 1800     | 0.117                      |
| <b>Step 3</b> |         |                            |                          |                                          |                      |                             |                               |          |                            |
| D6/ditch      | 6.779   | 0.021                      | 0.068                    | 0.017                                    | 0.005                | 0.005                       | 0.007                         | 36.470   | 0.002                      |
| R2/stream     | 5.967   | 0.019                      | 0.060                    | 0.015                                    | 0.005                | 0.004                       | 0.006                         | 2597.700 | 0.169                      |
| R3/stream     | 6.276   | 0.020                      | 0.063                    | 0.016                                    | 0.005                | 0.005                       | 0.006                         | 885.200  | 0.057                      |
| R4/stream     | 6.236   | 0.019                      | 0.062                    | 0.016                                    | 0.005                | 0.005                       | 0.006                         | 607.600  | 0.039                      |

AF: Assessment factor; PEC: Predicted environmental concentration; RAC: Regulatory acceptable concentration; PEC/RAC ratios above the relevant trigger of 1 are shown in **bold**

**Aquatic organisms: acceptability of risk (PEC/RAC < 1) for Glyphosate for each organism group based on FOCUS Steps 1, 2 and 3 calculations for the use of MON 52276 in vegetables, leafy (2 × 1080 g a.s./ha, with application interval of 28 days). Uses 2 a-c.**

| Group        |  | Fish acute                 | Fish prolonged           | Inverteb. acute                          | Inverteb. prolonged  | Algae                       | Aquatic macrophytes           |                 | Sed. dwell. prolonged      |
|--------------|--|----------------------------|--------------------------|------------------------------------------|----------------------|-----------------------------|-------------------------------|-----------------|----------------------------|
| Test species |  | <i>Lepomis macrochirus</i> | <i>Brachydanio rerio</i> | <i>Crassostrea gigas / Daphnia magna</i> | <i>Daphnia magna</i> | <i>Skeletonema costatum</i> | <i>Myriophyllum aquaticum</i> |                 | <i>Chironomus riparius</i> |
| Endpoint     |  | LC <sub>50</sub>           | NOEC                     | EC <sub>50</sub>                         | NOEC                 | ErC <sub>50</sub>           | ErC <sub>50</sub>             | <b>Endpoint</b> | NOEC                       |

**Aquatic organisms: acceptability of risk (PEC/RAC < 1) for Glyphosate for each organism group based on FOCUS Steps 1, 2 and 3 calculations for the use of MON 52276 in vegetables, leafy (2 × 1080 g a.s./ha, with application interval of 28 days). Uses 2 a-c.**

| Group                    |                              | Fish acute                 | Fish prolonged           | Inverteb. acute                                 | Inverteb. prolonged  | Algae                       | Aquatic macrophytes           |                                | Sed. dwell. prolonged      |
|--------------------------|------------------------------|----------------------------|--------------------------|-------------------------------------------------|----------------------|-----------------------------|-------------------------------|--------------------------------|----------------------------|
| Test species             |                              | <i>Lepomis macrochirus</i> | <i>Brachydanio rerio</i> | <i>Crassostrea gigas</i> / <i>Daphnia magna</i> | <i>Daphnia magna</i> | <i>Skeletonema costatum</i> | <i>Myriophyllum aquaticum</i> |                                | <i>Chironomus riparius</i> |
| (µg/L)                   |                              | 32000                      | 1000                     | 40000                                           | 12500                | 13500                       | 10330                         | (µg/kg)                        | 154000                     |
| AF                       |                              | 100                        | 10                       | 100                                             | 10                   | 10                          | 10                            | AF                             | 10                         |
| RAC (µg/L)               |                              | 320                        | 100                      | 400                                             | 1250                 | 1350                        | 1033                          | RAC (µg/kg)                    | 15400                      |
| FOCUS Scenario           | PEC <sub>sw,max</sub> (µg/L) |                            |                          |                                                 |                      |                             |                               | PEC <sub>sed,max</sub> (µg/kg) |                            |
| <b>Step 1</b>            |                              |                            |                          |                                                 |                      |                             |                               |                                |                            |
|                          | 125.789                      | 0.393                      | <b>1.258</b>             | 0.314                                           | 0.101                | 0.093                       | 0.122                         | 4710                           | 0.306                      |
| <b>Step 2</b>            |                              |                            |                          |                                                 |                      |                             |                               |                                |                            |
| N-Europe                 | 52.461                       | 0.164                      | 0.525                    | 0.131                                           | 0.042                | 0.039                       | 0.051                         | 2230                           | 0.145                      |
| S-Europe                 | 42.640                       | 0.133                      | 0.426                    | 0.107                                           | 0.034                | 0.032                       | 0.041                         | 1800                           | 0.117                      |
| <b>Step 3</b>            |                              |                            |                          |                                                 |                      |                             |                               |                                |                            |
| D3/ditch                 | 6.744                        | 0.021                      | 0.067                    | 0.017                                           | 0.005                | 0.005                       | 0.007                         | 6.417                          | 0.000                      |
| D3/ditch 2 <sup>nd</sup> | 6.739                        | 0.021                      | 0.067                    | 0.017                                           | 0.005                | 0.005                       | 0.007                         | 8.529                          | 0.001                      |
| D4/pond                  | 0.258                        | 0.001                      | 0.003                    | 0.001                                           | 0.000                | 0.000                       | 0.000                         | 6.790                          | 0.000                      |
| D4/stream                | 5.421                        | 0.017                      | 0.054                    | 0.014                                           | 0.004                | 0.004                       | 0.005                         | 0.880                          | 0.000                      |
| D6/ditch                 | 6.793                        | 0.021                      | 0.068                    | 0.017                                           | 0.005                | 0.005                       | 0.007                         | 33.170                         | 0.002                      |
| R1/pond                  | 1.758                        | 0.005                      | 0.018                    | 0.004                                           | 0.001                | 0.001                       | 0.002                         | 76.920                         | 0.005                      |
| R1/pond 2 <sup>nd</sup>  | 2.164                        | 0.007                      | 0.022                    | 0.005                                           | 0.002                | 0.002                       | 0.002                         | 82.350                         | 0.005                      |



**Aquatic organisms: acceptability of risk (PEC/RAC < 1) for Glyphosate for each organism group based on FOCUS Steps 1, 2 and 3 calculations for the use of MON 52276 in vegetables, leafy (2 × 1080 g a.s./ha, with application interval of 28 days). Uses 2 a-c.**

| Group                        |       | Fish acute                 | Fish prolonged           | Inverteb. acute                          | Inverteb. prolonged  | Algae                       | Aquatic macrophytes           |          | Sed. dwell. prolonged      |
|------------------------------|-------|----------------------------|--------------------------|------------------------------------------|----------------------|-----------------------------|-------------------------------|----------|----------------------------|
| Test species                 |       | <i>Lepomis macrochirus</i> | <i>Brachydanio rerio</i> | <i>Crassostrea gigas / Daphnia magna</i> | <i>Daphnia magna</i> | <i>Skeletonema costatum</i> | <i>Myriophyllum aquaticum</i> |          | <i>Chironomus riparius</i> |
| R1/stream                    | 4.442 | 0.014                      | 0.044                    | 0.011                                    | 0.004                | 0.003                       | 0.004                         | 466.200  | 0.030                      |
| R1/stream<br>2 <sup>nd</sup> | 4.440 | 0.014                      | 0.044                    | 0.011                                    | 0.004                | 0.003                       | 0.004                         | 1012.600 | 0.066                      |
| R2/stream                    | 5.967 | 0.019                      | 0.060                    | 0.015                                    | 0.005                | 0.004                       | 0.006                         | 1906     | 0.124                      |
| R2/stream<br>2 <sup>nd</sup> | 5.967 | 0.019                      | 0.060                    | 0.015                                    | 0.005                | 0.004                       | 0.006                         | 2161.800 | 0.140                      |
| R3/stream                    | 6.277 | 0.020                      | 0.063                    | 0.016                                    | 0.005                | 0.005                       | 0.006                         | 1522.500 | 0.099                      |
| R3/stream<br>2 <sup>nd</sup> | 6.277 | 0.020                      | 0.063                    | 0.016                                    | 0.005                | 0.005                       | 0.006                         | 885      | 0.057                      |
| R4/stream                    | 5.282 | 0.017                      | 0.053                    | 0.013                                    | 0.004                | 0.004                       | 0.005                         | 683.800  | 0.044                      |
| R4/stream<br>2 <sup>nd</sup> | 5.758 | 0.018                      | 0.058                    | 0.014                                    | 0.005                | 0.004                       | 0.006                         | 935.600  | 0.061                      |

AF: Assessment factor; PEC: Predicted environmental concentration; RAC: Regulatory acceptable concentration; PEC/RAC ratios above the relevant trigger of 1 are shown in **bold**

**Aquatic organisms: acceptability of risk (PEC/RAC < 1) for Glyphosate for each organism group based on FOCUS Steps 1, 2 and 3 calculations for the use of MON 52276 in sugar beets (2 × 1080 g a.s./ha, with application interval of 28 days). Uses 2 a-c.**

| Group           |                              | Fish acute                 | Fish prolonged           | Inverteb. acute                                 | Inverteb. prolonged  | Algae                       | Aquatic macrophytes           |                                | Sed. dwell. prolonged      |
|-----------------|------------------------------|----------------------------|--------------------------|-------------------------------------------------|----------------------|-----------------------------|-------------------------------|--------------------------------|----------------------------|
| Test species    |                              | <i>Lepomis macrochirus</i> | <i>Brachydanio rerio</i> | <i>Crassostrea gigas</i> / <i>Daphnia magna</i> | <i>Daphnia magna</i> | <i>Skeletonema costatum</i> | <i>Myriophyllum aquaticum</i> |                                | <i>Chironomus riparius</i> |
| Endpoint (µg/L) |                              | LC <sub>50</sub><br>32000  | NOEC<br>1000             | EC <sub>50</sub><br>40000                       | NOEC<br>12500        | ErC <sub>50</sub><br>13500  | ErC <sub>50</sub><br>10330    | Endpoint (µg/kg)               | NOEC<br>154000             |
| AF              |                              | 100                        | 10                       | 100                                             | 10                   | 10                          | 10                            | AF                             | 10                         |
| RAC (µg/L)      |                              | 320                        | 100                      | 400                                             | 1250                 | 1350                        | 1033                          | RAC (µg/kg)                    | 15400                      |
| FOCUS Scenario  | PEC <sub>sw,max</sub> (µg/L) |                            |                          |                                                 |                      |                             |                               | PEC <sub>sed,max</sub> (µg/kg) |                            |
| <b>Step 1</b>   |                              |                            |                          |                                                 |                      |                             |                               |                                |                            |
|                 | 125.789                      | 0.393                      | <b>1.258</b>             | 0.314                                           | 0.101                | 0.093                       | 0.122                         | 4710                           | 0.306                      |
| <b>Step 2</b>   |                              |                            |                          |                                                 |                      |                             |                               |                                |                            |
| N-Europe        | 52.461                       | 0.164                      | 0.525                    | 0.131                                           | 0.042                | 0.039                       | 0.051                         | 2230                           | 0.145                      |
| S-Europe        | 42.640                       | 0.133                      | 0.426                    | 0.107                                           | 0.034                | 0.032                       | 0.041                         | 1800                           | 0.117                      |
| <b>Step 3</b>   |                              |                            |                          |                                                 |                      |                             |                               |                                |                            |
| D3/ditch        | 5.557                        | 0.017                      | 0.056                    | 0.014                                           | 0.004                | 0.004                       | 0.005                         | 5.351                          | 0.000                      |
| D4/pond         | 0.253                        | 0.001                      | 0.003                    | 0.001                                           | 0.000                | 0.000                       | 0.000                         | 5.943                          | 0.000                      |
| D4/stream       | 4.871                        | 0.015                      | 0.049                    | 0.012                                           | 0.004                | 0.004                       | 0.005                         | 1.183                          | 0.000                      |
| R1/pond         | 2.145                        | 0.007                      | 0.021                    | 0.005                                           | 0.002                | 0.002                       | 0.002                         | 72.770                         | 0.005                      |
| R1/stream       | 4.299                        | 0.013                      | 0.043                    | 0.011                                           | 0.003                | 0.003                       | 0.004                         | 505                            | 0.033                      |
| R3/stream       | 5.442                        | 0.017                      | 0.054                    | 0.014                                           | 0.004                | 0.004                       | 0.005                         | 885.500                        | 0.058                      |

**Aquatic organisms: acceptability of risk (PEC/RAC < 1) for Glyphosate for each organism group based on FOCUS Steps 1, 2 and 3 calculations for the use of MON 52276 in sugar beets (2 × 1080 g a.s./ha, with application interval of 28 days). Uses 2 a-c.**

| Group        |  | Fish acute                 | Fish prolonged           | Inverteb. acute                          | Inverteb. prolonged  | Algae                       | Aquatic macrophytes           |  | Sed. dwell. prolonged      |
|--------------|--|----------------------------|--------------------------|------------------------------------------|----------------------|-----------------------------|-------------------------------|--|----------------------------|
| Test species |  | <i>Lepomis macrochirus</i> | <i>Brachydanio rerio</i> | <i>Crassostrea gigas / Daphnia magna</i> | <i>Daphnia magna</i> | <i>Skeletonema costatum</i> | <i>Myriophyllum aquaticum</i> |  | <i>Chironomus riparius</i> |

AF: Assessment factor; PEC: Predicted environmental concentration; RAC: Regulatory acceptable concentration; PEC/RAC ratios above the relevant trigger of 1 are shown in **bold**

**Aquatic organisms: acceptability of risk (PEC/RAC < 1) for AMPA for each organism group based on FOCUS Steps 1, 2 and 3 calculations for the use of MON 52276 in field crops<sup>1</sup> (2 × 1080 g a.s./ha, with application interval of 28 days). Uses 2 a-c.**

| Group                                            |                              | Fish acute                 | Fish prolonged             | Inverteb. acute            | Inverteb. prolonged  | Algae                                   | Aquatic macrophytes                     |                                | Sed. dwell. prolonged      |
|--------------------------------------------------|------------------------------|----------------------------|----------------------------|----------------------------|----------------------|-----------------------------------------|-----------------------------------------|--------------------------------|----------------------------|
| Test species                                     |                              | <i>Oncorhynchus mykiss</i> | <i>Pimephales promelas</i> | <i>Daphnia magna</i>       | <i>Daphnia magna</i> | <i>Pseudokirchneriella subcapitata</i>  | <i>Myriophyllum aquaticum</i>           |                                | <i>Chironomus riparius</i> |
| Endpoint (µg/L)                                  |                              | LC <sub>50</sub><br>100000 | NOEC<br>12000              | EC <sub>50</sub><br>690000 | NOEC<br>15000        | E <sub>r</sub> C <sub>50</sub><br>31900 | E <sub>r</sub> C <sub>50</sub><br>72000 | Endpoint (µg/kg)               | NOEC<br>786500             |
| AF                                               |                              | 100                        | 10                         | 100                        | 10                   | 10                                      | 10                                      | AF                             | 10                         |
| RAC (µg/L)                                       |                              | 1000                       | 1200                       | 6900                       | 1500                 | 3190                                    | 7200                                    | RAC (µg/kg)                    | 78650                      |
| FOCUS Scenario                                   | PEC <sub>sw,max</sub> (µg/L) |                            |                            |                            |                      |                                         |                                         | PEC <sub>sed,max</sub> (µg/kg) |                            |
| <b>Step 1 (DT<sub>50</sub> wat/sed = 89.9 d)</b> |                              |                            |                            |                            |                      |                                         |                                         |                                |                            |
|                                                  | 100.494                      | 0.100                      | 0.084                      | 0.015                      | 0.067                | 0.032                                   | 0.014                                   | 2470                           | 0.031                      |
| <b>Step 2 (DT<sub>50</sub> wat/sed = 89.9 d)</b> |                              |                            |                            |                            |                      |                                         |                                         |                                |                            |
| N-Europe                                         | 47.863                       | 0.048                      | 0.040                      | 0.007                      | 0.032                | 0.015                                   | 0.007                                   | 1210                           | 0.015                      |
| S-Europe                                         | 38.459                       | 0.038                      | 0.032                      | 0.006                      | 0.026                | 0.012                                   | 0.005                                   | 969.999                        | 0.012                      |

**Aquatic organisms: acceptability of risk (PEC/RAC < 1) for AMPA for each organism group based on FOCUS Steps 1, 2 and 3 calculations for the use of MON 52276 in field crops<sup>1</sup> (2 × 1080 g a.s./ha, with application interval of 28 days). Uses 2 a-c.**

| Group        |  | Fish acute                 | Fish prolonged             | Inverteb. acute      | Inverteb. prolonged  | Algae                                  | Aquatic macrophytes           |  | Sed. dwell. prolonged      |
|--------------|--|----------------------------|----------------------------|----------------------|----------------------|----------------------------------------|-------------------------------|--|----------------------------|
| Test species |  | <i>Oncorhynchus mykiss</i> | <i>Pimephales promelas</i> | <i>Daphnia magna</i> | <i>Daphnia magna</i> | <i>Pseudokirchneriella subcapitata</i> | <i>Myriophyllum aquaticum</i> |  | <i>Chironomus riparius</i> |

AF: Assessment factor; PEC: Predicted environmental concentration; RAC: Regulatory acceptable concentration; PEC/RAC ratios above the relevant trigger of 1 are shown in **bold**

<sup>1</sup> covering all corresponding uses in root vegetables, potatoes, bulb vegetables, fruiting vegetables, leafy vegetables and sugar beets

**Aquatic organisms: acceptability of risk (PEC/RAC < 1) for HMPA for each organism group based on FOCUS Steps 1, 2 and 3 calculations for the use of MON 52276 in field crops<sup>1</sup> (2 × 1080 g a.s./ha, with application interval of 28 days). Uses 2 a-c.**

| Group           |                              | Fish acute                | Inverteb. acute            | Algae                                    | Aquatic macrophytes                      |                                | Sed. dwell. prolonged                    |
|-----------------|------------------------------|---------------------------|----------------------------|------------------------------------------|------------------------------------------|--------------------------------|------------------------------------------|
| Test species    |                              | -                         | <i>Daphnia magna</i>       | <i>Pseudokirchneriella subcapitata</i>   | <i>Lemna gibba</i>                       |                                | <i>Chironomus riparius</i> <sup>\$</sup> |
| Endpoint (µg/L) |                              | LC <sub>50</sub><br>32000 | EC <sub>50</sub><br>100000 | E <sub>r</sub> C <sub>50</sub><br>120000 | E <sub>r</sub> C <sub>50</sub><br>123000 | Endpoint (µg/kg)               | NOEC<br>15400 µg/kg sed.                 |
| AF              |                              | 100                       | 100                        | 10                                       | 10                                       | AF                             | 10                                       |
| RAC (µg/L)      |                              | 320                       | 1000                       | 12000                                    | 12300                                    | RAC (µg/kg)                    | 1540 µg/kg sed.                          |
| FOCUS Scenario  | PEC <sub>sw,max</sub> (µg/L) |                           |                            |                                          |                                          | PEC <sub>sed,max</sub> (µg/kg) |                                          |
| <b>Step 1</b>   |                              |                           |                            |                                          |                                          |                                |                                          |
|                 | 48.385                       | 0.151                     | 0.048                      | 0.004                                    | 0.004                                    | 341.71                         | 0.222                                    |
| <b>Step 2</b>   |                              |                           |                            |                                          |                                          |                                |                                          |
| N-Europe        | 22.957                       | 0.072                     | 0.023                      | 0.002                                    | 0.002                                    | 162.16                         | 0.105                                    |
| S-Europe        | 18.594                       | 0.058                     | 0.019                      | 0.002                                    | 0.002                                    | 131.33                         | 0.085                                    |

**Aquatic organisms: acceptability of risk (PEC/RAC < 1) for HMPA for each organism group based on FOCUS Steps 1, 2 and 3 calculations for the use of MON 52276 in field crops<sup>1</sup> (2 × 1080 g a.s./ha, with application interval of 28 days). Uses 2 a-c.**

| Group        |  | Fish acute | Inverteb. acute      | Algae                                  | Aquatic macrophytes |  | Sed. dwell. prolonged                    |
|--------------|--|------------|----------------------|----------------------------------------|---------------------|--|------------------------------------------|
| Test species |  | -          | <i>Daphnia magna</i> | <i>Pseudokirchneriella subcapitata</i> | <i>Lemna gibba</i>  |  | <i>Chironomus riparius</i> <sup>\$</sup> |

AF: Assessment factor; PEC: Predicted environmental concentration; RAC: Regulatory acceptable concentration; PEC/RAC ratios above the relevant trigger of 1 are shown in **bold**

<sup>1</sup> covering all corresponding uses in root vegetables, potatoes, bulb vegetables, fruiting vegetables, leafy vegetables and sugar beets

<sup>\$</sup> added following open point of section 4 (expert consultation 4.2): “RMS to update the PEC sediment calculations for HMPA using a default Koc value of 10000 mL/g and to include the metabolite HMPA in the residue definition for sediment in both an update to the RAR and the list of endpoints.” As worst case the metabolite was considered 10 times more toxic than glyphosate.

**Aquatic organisms: acceptability of risk (PEC/RAC < 1) for P1a and M3.3 for sediment dwellers based on FOCUS Steps 1, 2 and 3 calculations for the use of MON 52276 in field crops<sup>1</sup> (2 × 1080 g a.s./ha, with application interval of 28 days). Uses 2 a-c.**

| Group           |                                | Sed. dwell. prolonged      |
|-----------------|--------------------------------|----------------------------|
| Test species    |                                | <i>Chironomus riparius</i> |
| Endpoint (µg/L) | Endpoint (µg/kg)               | NOEC*                      |
| AF              | AF                             | 78650                      |
| RAC (µg/L)      | RAC (µg/kg)                    | 10                         |
| FOCUS Scenario  | PEC <sub>sed,max</sub> (µg/kg) | 7865                       |
| <b>Step 1</b>   |                                |                            |
|                 | 549.077                        | 0.070                      |
| <b>Step 2</b>   |                                |                            |
| N-Europe        | 260.561                        | 0.033                      |
| S-Europe        | 211.022                        | 0.027                      |

**Aquatic organisms: acceptability of risk (PEC/RAC < 1) for P1a and M3.3 for sediment dwellers based on FOCUS Steps 1, 2 and 3 calculations for the use of MON 52276 in field crops<sup>1</sup> (2 × 1080 g a.s./ha, with application interval of 28 days). Uses 2 a-c.**

|                     |  |                              |
|---------------------|--|------------------------------|
| <b>Group</b>        |  | <b>Sed. dwell. prolonged</b> |
| <b>Test species</b> |  | <i>Chironomus riparius</i>   |

AF: Assessment factor; PEC: Predicted environmental concentration; RAC: Regulatory acceptable concentration; PEC/RAC ratios above the relevant trigger of 1 are shown in **bold**

<sup>1</sup> covering all corresponding uses in root vegetables, potatoes, bulb vegetables, fruiting vegetables, leafy vegetables and sugar beets

\* considered ten times more toxic than AMPA

**Aquatic organisms: acceptability of risk (PEC/RAC < 1) for Glyphosate for each organism group based on FOCUS Steps 1, 2 and 3 calculations for the use of MON 52276 in vegetables, root (1 × 1440 g a.s./ha). Covers uses 1 a-c, 2 a-c, 6 a-b, 10 a-c.**

| Group                    |                              | Fish acute                 | Fish prolonged           | Inverteb. acute                          | Inverteb. prolonged  | Algae                       | Aquatic macrophytes           |                                | Sed. dwell. prolonged      |
|--------------------------|------------------------------|----------------------------|--------------------------|------------------------------------------|----------------------|-----------------------------|-------------------------------|--------------------------------|----------------------------|
| Test species             |                              | <i>Lepomis macrochirus</i> | <i>Brachydanio rerio</i> | <i>Crassostrea gigas / Daphnia magna</i> | <i>Daphnia magna</i> | <i>Skeletonema costatum</i> | <i>Myriophyllum aquaticum</i> |                                | <i>Chironomus riparius</i> |
| Endpoint (µg/L)          |                              | LC <sub>50</sub><br>32000  | NOEC<br>1000             | EC <sub>50</sub><br>40000                | NOEC<br>12500        | ErC <sub>50</sub><br>13500  | ErC <sub>50</sub><br>10330    | Endpoint (µg/kg)               | NOEC<br>154000             |
| AF                       |                              | 100                        | 10                       | 100                                      | 10                   | 10                          | 10                            | AF                             | 10                         |
| RAC (µg/L)               |                              | 320                        | 100                      | 400                                      | 1250                 | 1350                        | 1033                          | RAC (µg/kg)                    | 15400                      |
| FOCUS Scenario           | PEC <sub>sw,max</sub> (µg/L) |                            |                          |                                          |                      |                             |                               | PEC <sub>sed,max</sub> (µg/kg) |                            |
| <b>Step 1</b>            |                              |                            |                          |                                          |                      |                             |                               |                                |                            |
|                          | 83.859                       | 0.262                      | 0.839                    | 0.210                                    | 0.067                | 0.062                       | 0.081                         | 3140                           | 0.204                      |
| <b>Step 2</b>            |                              |                            |                          |                                          |                      |                             |                               |                                |                            |
| N-Europe                 | 37.443                       | 0.117                      | 0.374                    | 0.094                                    | 0.030                | 0.028                       | 0.036                         | 1590                           | 0.103                      |
| S-Europe                 | 30.501                       | 0.095                      | 0.305                    | 0.076                                    | 0.024                | 0.023                       | 0.030                         | 1280                           | 0.083                      |
| <b>Step 3</b>            |                              |                            |                          |                                          |                      |                             |                               |                                |                            |
| D3/ditch                 | 9.007                        | 0.028                      | 0.090                    | 0.023                                    | 0.007                | 0.007                       | 0.009                         | 8.308                          | 0.001                      |
| D6/ditch                 | 9.030                        | 0.028                      | 0.090                    | 0.023                                    | 0.007                | 0.007                       | 0.009                         | 13.950                         | 0.001                      |
| R1/pond                  | 1.004                        | 0.003                      | 0.010                    | 0.003                                    | 0.001                | 0.001                       | 0.001                         | 40.990                         | 0.003                      |
| R1/stream                | 5.936                        | 0.019                      | 0.059                    | 0.015                                    | 0.005                | 0.004                       | 0.006                         | 250.900                        | 0.016                      |
| R2/stream                | 7.968                        | 0.025                      | 0.080                    | 0.020                                    | 0.006                | 0.006                       | 0.008                         | 1301.300                       | 0.085                      |
| R2/stream <sub>2nd</sub> | 7.968                        | 0.025                      | 0.080                    | 0.020                                    | 0.006                | 0.006                       | 0.008                         | 1388.900                       | 0.090                      |

**Aquatic organisms: acceptability of risk (PEC/RAC < 1) for Glyphosate for each organism group based on FOCUS Steps 1, 2 and 3 calculations for the use of MON 52276 in vegetables, root (1 × 1440 g a.s./ha). Covers uses 1 a-c, 2 a-c, 6 a-b, 10 a-c.**

| Group        |       | Fish acute                 | Fish prolonged           | Inverteb. acute                          | Inverteb. prolonged  | Algae                       | Aquatic macrophytes           |         | Sed. dwell. prolonged      |
|--------------|-------|----------------------------|--------------------------|------------------------------------------|----------------------|-----------------------------|-------------------------------|---------|----------------------------|
| Test species |       | <i>Lepomis macrochirus</i> | <i>Brachydanio rerio</i> | <i>Crassostrea gigas / Daphnia magna</i> | <i>Daphnia magna</i> | <i>Skeletonema costatum</i> | <i>Myriophyllum aquaticum</i> |         | <i>Chironomus riparius</i> |
| R3/stream    | 8.381 | 0.026                      | 0.084                    | 0.021                                    | 0.007                | 0.006                       | 0.008                         | 189.900 | 0.012                      |
| R4/stream    | 5.860 | 0.018                      | 0.059                    | 0.015                                    | 0.005                | 0.004                       | 0.006                         | 372.700 | 0.024                      |

AF: Assessment factor; PEC: Predicted environmental concentration; RAC: Regulatory acceptable concentration; PEC/RAC ratios above the relevant trigger of 1 are shown in **bold**

**Aquatic organisms: acceptability of risk (PEC/RAC < 1) for Glyphosate for each organism group based on FOCUS Steps 1, 2 and 3 calculations for the use of MON 52276 in potatoes (1 × 1440 g a.s./ha). Covers uses 1 a-c, 2 a-c, 6 a-b, 10 a-c.**

| Group           |                              | Fish acute                 | Fish prolonged           | Inverteb. acute                          | Inverteb. prolonged  | Algae                       | Aquatic macrophytes           |                                | Sed. dwell. prolonged      |
|-----------------|------------------------------|----------------------------|--------------------------|------------------------------------------|----------------------|-----------------------------|-------------------------------|--------------------------------|----------------------------|
| Test species    |                              | <i>Lepomis macrochirus</i> | <i>Brachydanio rerio</i> | <i>Crassostrea gigas / Daphnia magna</i> | <i>Daphnia magna</i> | <i>Skeletonema costatum</i> | <i>Myriophyllum aquaticum</i> |                                | <i>Chironomus riparius</i> |
| Endpoint (µg/L) |                              | LC <sub>50</sub><br>32000  | NOEC<br>1000             | EC <sub>50</sub><br>40000                | NOEC<br>12500        | ErC <sub>50</sub><br>13500  | ErC <sub>50</sub><br>10330    | Endpoint (µg/kg)               | NOEC<br>154000             |
| AF              |                              | 100                        | 10                       | 100                                      | 10                   | 10                          | 10                            | AF                             | 10                         |
| RAC (µg/L)      |                              | 320                        | 100                      | 400                                      | 1250                 | 1350                        | 1033                          | RAC (µg/kg)                    | 15400                      |
| FOCUS Scenario  | PEC <sub>sw,max</sub> (µg/L) |                            |                          |                                          |                      |                             |                               | PEC <sub>sed,max</sub> (µg/kg) |                            |
| <b>Step 1</b>   |                              |                            |                          |                                          |                      |                             |                               |                                |                            |
|                 | 83.859                       | 0.262                      | 0.839                    | 0.210                                    | 0.067                | 0.062                       | 0.081                         | 3140                           | 0.204                      |



**Aquatic organisms: acceptability of risk (PEC/RAC < 1) for Glyphosate for each organism group based on FOCUS Steps 1, 2 and 3 calculations for the use of MON 52276 in potatoes (1 × 1440 g a.s./ha). Covers uses 1 a-c, 2 a-c, 6 a-b, 10 a-c.**

| Group                    |        | Fish acute                 | Fish prolonged           | Inverteb. acute                                 | Inverteb. prolonged  | Algae                       | Aquatic macrophytes           |          | Sed. dwell. prolonged      |
|--------------------------|--------|----------------------------|--------------------------|-------------------------------------------------|----------------------|-----------------------------|-------------------------------|----------|----------------------------|
| Test species             |        | <i>Lepomis macrochirus</i> | <i>Brachydanio rerio</i> | <i>Crassostrea gigas</i> / <i>Daphnia magna</i> | <i>Daphnia magna</i> | <i>Skeletonema costatum</i> | <i>Myriophyllum aquaticum</i> |          | <i>Chironomus riparius</i> |
| <b>Step 2</b>            |        |                            |                          |                                                 |                      |                             |                               |          |                            |
| N-Europe                 | 37.443 | 0.117                      | 0.374                    | 0.094                                           | 0.030                | 0.028                       | 0.036                         | 1590     | 0.103                      |
| S-Europe                 | 30.501 | 0.095                      | 0.305                    | 0.076                                           | 0.024                | 0.023                       | 0.030                         | 1280     | 0.083                      |
| <b>Step 3</b>            |        |                            |                          |                                                 |                      |                             |                               |          |                            |
| D3/ditch                 | 7.422  | 0.023                      | 0.074                    | 0.019                                           | 0.006                | 0.005                       | 0.007                         | 5.125    | 0.000                      |
| D4/pond                  | 0.292  | 0.001                      | 0.003                    | 0.001                                           | 0.000                | 0.000                       | 0.000                         | 5.082    | 0.000                      |
| D4/stream                | 6.314  | 0.020                      | 0.063                    | 0.016                                           | 0.005                | 0.005                       | 0.006                         | 0.502    | 0.000                      |
| D6/ditch                 | 7.473  | 0.023                      | 0.075                    | 0.019                                           | 0.006                | 0.006                       | 0.007                         | 15.430   | 0.001                      |
| D6/ditch 2 <sup>nd</sup> | 7.496  | 0.023                      | 0.075                    | 0.019                                           | 0.006                | 0.006                       | 0.007                         | 27.250   | 0.002                      |
| R1/pond                  | 1.179  | 0.004                      | 0.012                    | 0.003                                           | 0.001                | 0.001                       | 0.001                         | 48.470   | 0.003                      |
| R1/stream                | 5.147  | 0.016                      | 0.051                    | 0.013                                           | 0.004                | 0.004                       | 0.005                         | 294.400  | 0.019                      |
| R2/stream                | 6.909  | 0.022                      | 0.069                    | 0.017                                           | 0.006                | 0.005                       | 0.007                         | 1547.900 | 0.101                      |
| R3/stream                | 7.267  | 0.023                      | 0.073                    | 0.018                                           | 0.006                | 0.005                       | 0.007                         | 614.100  | 0.040                      |

AF: Assessment factor; PEC: Predicted environmental concentration; RAC: Regulatory acceptable concentration; PEC/RAC ratios above the relevant trigger of 1 are shown in **bold**

**Aquatic organisms: acceptability of risk (PEC/RAC < 1) for Glyphosate for each organism group based on FOCUS Steps 1, 2 and 3 calculations for the use of MON 52276 in vegetables, bulb (1 × 1440 g a.s./ha). Covers uses 1 a-c, 2 a-c, 6 a-b, 10 a-c.**

| Group                       |                              | Fish acute                 | Fish prolonged           | Inverteb. acute                                 | Inverteb. prolonged  | Algae                       | Aquatic macrophytes           |                                | Sed. dwell. prolonged      |
|-----------------------------|------------------------------|----------------------------|--------------------------|-------------------------------------------------|----------------------|-----------------------------|-------------------------------|--------------------------------|----------------------------|
| Test species                |                              | <i>Lepomis macrochirus</i> | <i>Brachydanio rerio</i> | <i>Crassostrea gigas</i> / <i>Daphnia magna</i> | <i>Daphnia magna</i> | <i>Skeletonema costatum</i> | <i>Myriophyllum aquaticum</i> |                                | <i>Chironomus riparius</i> |
| Endpoint (µg/L)             |                              | LC <sub>50</sub><br>32000  | NOEC<br>1000             | EC <sub>50</sub><br>40000                       | NOEC<br>12500        | ErC <sub>50</sub><br>13500  | ErC <sub>50</sub><br>10330    | Endpoint (µg/kg)               | NOEC<br>154000             |
| AF                          |                              | 100                        | 10                       | 100                                             | 10                   | 10                          | 10                            | AF                             | 10                         |
| RAC (µg/L)                  |                              | 320                        | 100                      | 400                                             | 1250                 | 1350                        | 1033                          | RAC (µg/kg)                    | 15400                      |
| FOCUS Scenario              | PEC <sub>sw,max</sub> (µg/L) |                            |                          |                                                 |                      |                             |                               | PEC <sub>sed,max</sub> (µg/kg) |                            |
| <b>Step 1</b>               |                              |                            |                          |                                                 |                      |                             |                               |                                |                            |
|                             | 83.859                       | 0.262                      | 0.839                    | 0.210                                           | 0.067                | 0.062                       | 0.081                         | 3140                           | 0.204                      |
| <b>Step 2</b>               |                              |                            |                          |                                                 |                      |                             |                               |                                |                            |
| N-Europe                    | 37.443                       | 0.117                      | 0.374                    | 0.094                                           | 0.030                | 0.028                       | 0.036                         | 1590                           | 0.103                      |
| S-Europe                    | 30.501                       | 0.095                      | 0.305                    | 0.076                                           | 0.024                | 0.023                       | 0.030                         | 1280                           | 0.083                      |
| <b>Step 3</b>               |                              |                            |                          |                                                 |                      |                             |                               |                                |                            |
| D3/ditch                    | 8.974                        | 0.028                      | 0.090                    | 0.022                                           | 0.007                | 0.007                       | 0.009                         | 5.849                          | 0.000                      |
| D4/pond                     | 0.301                        | 0.001                      | 0.003                    | 0.001                                           | 0.000                | 0.000                       | 0.000                         | 5.238                          | 0.000                      |
| D4/stream                   | 7.096                        | 0.022                      | 0.071                    | 0.018                                           | 0.006                | 0.005                       | 0.007                         | 0.483                          | 0.000                      |
| D6/ditch                    | 9.070                        | 0.028                      | 0.091                    | 0.023                                           | 0.007                | 0.007                       | 0.009                         | 31.350                         | 0.002                      |
| D6/ditch<br>2 <sup>nd</sup> | 9.070                        | 0.028                      | 0.091                    | 0.023                                           | 0.007                | 0.007                       | 0.009                         | 31.720                         | 0.002                      |
| R1/pond                     | 1.130                        | 0.004                      | 0.011                    | 0.003                                           | 0.001                | 0.001                       | 0.001                         | 45.900                         | 0.003                      |

**Aquatic organisms: acceptability of risk (PEC/RAC < 1) for Glyphosate for each organism group based on FOCUS Steps 1, 2 and 3 calculations for the use of MON 52276 in vegetables, bulb (1 × 1440 g a.s./ha). Covers uses 1 a-c, 2 a-c, 6 a-b, 10 a-c.**

| Group        |       | Fish acute                 | Fish prolonged           | Inverteb. acute                          | Inverteb. prolonged  | Algae                       | Aquatic macrophytes           |         | Sed. dwell. prolonged      |
|--------------|-------|----------------------------|--------------------------|------------------------------------------|----------------------|-----------------------------|-------------------------------|---------|----------------------------|
| Test species |       | <i>Lepomis macrochirus</i> | <i>Brachydanio rerio</i> | <i>Crassostrea gigas / Daphnia magna</i> | <i>Daphnia magna</i> | <i>Skeletonema costatum</i> | <i>Myriophyllum aquaticum</i> |         | <i>Chironomus riparius</i> |
| R1/stream    | 5.936 | 0.019                      | 0.059                    | 0.015                                    | 0.005                | 0.004                       | 0.006                         | 296     | 0.019                      |
| R2/stream    | 7.968 | 0.025                      | 0.080                    | 0.020                                    | 0.006                | 0.006                       | 0.008                         | 1305    | 0.085                      |
| R3/stream    | 8.380 | 0.026                      | 0.084                    | 0.021                                    | 0.007                | 0.006                       | 0.008                         | 265.900 | 0.017                      |
| R4/stream    | 5.934 | 0.019                      | 0.059                    | 0.015                                    | 0.005                | 0.004                       | 0.006                         | 247.200 | 0.016                      |

AF: Assessment factor; PEC: Predicted environmental concentration; RAC: Regulatory acceptable concentration; PEC/RAC ratios above the relevant trigger of 1 are shown in **bold**

**Aquatic organisms: acceptability of risk (PEC/RAC < 1) for Glyphosate for each organism group based on FOCUS Steps 1, 2 and 3 calculations for the use of MON 52276 in vegetables, fruiting (1 × 1440 g a.s./ha). Covers uses 1 a-c, 2 a-c, 6 a-b, 10 a-c.**

| Group           |                              | Fish acute                 | Fish prolonged           | Inverteb. acute                          | Inverteb. prolonged  | Algae                       | Aquatic macrophytes           |                                      | Sed. dwell. prolonged      |
|-----------------|------------------------------|----------------------------|--------------------------|------------------------------------------|----------------------|-----------------------------|-------------------------------|--------------------------------------|----------------------------|
| Test species    |                              | <i>Lepomis macrochirus</i> | <i>Brachydanio rerio</i> | <i>Crassostrea gigas / Daphnia magna</i> | <i>Daphnia magna</i> | <i>Skeletonema costatum</i> | <i>Myriophyllum aquaticum</i> |                                      | <i>Chironomus riparius</i> |
| Endpoint (µg/L) |                              | LC <sub>50</sub><br>32000  | NOEC<br>1000             | EC <sub>50</sub><br>40000                | NOEC<br>12500        | ErC <sub>50</sub><br>13500  | ErC <sub>50</sub><br>10330    | <b>Endpoint (µg/kg)</b>              | NOEC<br>154000             |
| AF              |                              | 100                        | 10                       | 100                                      | 10                   | 10                          | 10                            | <b>AF</b>                            | 10                         |
| RAC (µg/L)      |                              | 320                        | 100                      | 400                                      | 1250                 | 1350                        | 1033                          | <b>RAC (µg/kg)</b>                   | 15400                      |
| FOCUS Scenario  | PEC <sub>sw,max</sub> (µg/L) |                            |                          |                                          |                      |                             |                               | <b>PEC<sub>sed,max</sub> (µg/kg)</b> |                            |

**Aquatic organisms: acceptability of risk (PEC/RAC < 1) for Glyphosate for each organism group based on FOCUS Steps 1, 2 and 3 calculations for the use of MON 52276 in vegetables, fruiting (1 × 1440 g a.s./ha). Covers uses 1 a-c, 2 a-c, 6 a-b, 10 a-c.**

| Group         |        | Fish acute                 | Fish prolonged           | Inverteb. acute                          | Inverteb. prolonged  | Algae                       | Aquatic macrophytes           |          | Sed. dwell. prolonged      |
|---------------|--------|----------------------------|--------------------------|------------------------------------------|----------------------|-----------------------------|-------------------------------|----------|----------------------------|
| Test species  |        | <i>Lepomis macrochirus</i> | <i>Brachydanio rerio</i> | <i>Crassostrea gigas / Daphnia magna</i> | <i>Daphnia magna</i> | <i>Skeletonema costatum</i> | <i>Myriophyllum aquaticum</i> |          | <i>Chironomus riparius</i> |
| <b>Step 1</b> |        |                            |                          |                                          |                      |                             |                               |          |                            |
|               | 83.859 | 0.262                      | 0.839                    | 0.210                                    | 0.067                | 0.062                       | 0.081                         | 3140     | 0.204                      |
| <b>Step 2</b> |        |                            |                          |                                          |                      |                             |                               |          |                            |
| N-Europe      | 37.443 | 0.117                      | 0.374                    | 0.094                                    | 0.030                | 0.028                       | 0.036                         | 1590     | 0.103                      |
| S-Europe      | 30.501 | 0.095                      | 0.305                    | 0.076                                    | 0.024                | 0.023                       | 0.030                         | 1280     | 0.083                      |
| <b>Step 3</b> |        |                            |                          |                                          |                      |                             |                               |          |                            |
| D6/ditch      | 9.051  | 0.028                      | 0.091                    | 0.023                                    | 0.007                | 0.007                       | 0.009                         | 23.730   | 0.002                      |
| R2/stream     | 7.968  | 0.025                      | 0.080                    | 0.020                                    | 0.006                | 0.006                       | 0.008                         | 1675.900 | 0.109                      |
| R3/stream     | 8.381  | 0.026                      | 0.084                    | 0.021                                    | 0.007                | 0.006                       | 0.008                         | 614.100  | 0.040                      |
| R4/stream     | 5.935  | 0.019                      | 0.059                    | 0.015                                    | 0.005                | 0.004                       | 0.006                         | 344      | 0.022                      |

AF: Assessment factor; PEC: Predicted environmental concentration; RAC: Regulatory acceptable concentration; PEC/RAC ratios above the relevant trigger of 1 are shown in **bold**

**Aquatic organisms: acceptability of risk (PEC/RAC < 1) for Glyphosate for each organism group based on FOCUS Steps 1, 2 and 3 calculations for the use of MON 52276 in vegetables, leafy (1 × 1440 g a.s./ha). Covers uses 1 a-c, 2 a-c, 6 a-b, 10 a-c.**

| Group        |  | Fish acute                 | Fish prolonged           | Inverteb. acute                          | Inverteb. prolonged  | Algae                       | Aquatic macrophytes           |                 | Sed. dwell. prolonged      |
|--------------|--|----------------------------|--------------------------|------------------------------------------|----------------------|-----------------------------|-------------------------------|-----------------|----------------------------|
| Test species |  | <i>Lepomis macrochirus</i> | <i>Brachydanio rerio</i> | <i>Crassostrea gigas / Daphnia magna</i> | <i>Daphnia magna</i> | <i>Skeletonema costatum</i> | <i>Myriophyllum aquaticum</i> |                 | <i>Chironomus riparius</i> |
| Endpoint     |  | LC <sub>50</sub>           | NOEC                     | EC <sub>50</sub>                         | NOEC                 | ErC <sub>50</sub>           | ErC <sub>50</sub>             | <b>Endpoint</b> | NOEC                       |

**Aquatic organisms: acceptability of risk (PEC/RAC < 1) for Glyphosate for each organism group based on FOCUS Steps 1, 2 and 3 calculations for the use of MON 52276 in vegetables, leafy (1 × 1440 g a.s./ha). Covers uses 1 a-c, 2 a-c, 6 a-b, 10 a-c.**

| Group                       |                              | Fish acute                 | Fish prolonged           | Inverteb. acute                                 | Inverteb. prolonged  | Algae                       | Aquatic macrophytes           |                                | Sed. dwell. prolonged      |
|-----------------------------|------------------------------|----------------------------|--------------------------|-------------------------------------------------|----------------------|-----------------------------|-------------------------------|--------------------------------|----------------------------|
| Test species                |                              | <i>Lepomis macrochirus</i> | <i>Brachydanio rerio</i> | <i>Crassostrea gigas</i> / <i>Daphnia magna</i> | <i>Daphnia magna</i> | <i>Skeletonema costatum</i> | <i>Myriophyllum aquaticum</i> |                                | <i>Chironomus riparius</i> |
| (µg/L)                      |                              | 32000                      | 1000                     | 40000                                           | 12500                | 13500                       | 10330                         | (µg/kg)                        | 154000                     |
| AF                          |                              | 100                        | 10                       | 100                                             | 10                   | 10                          | 10                            | AF                             | 10                         |
| RAC (µg/L)                  |                              | 320                        | 100                      | 400                                             | 1250                 | 1350                        | 1033                          | RAC (µg/kg)                    | 15400                      |
| FOCUS Scenario              | PEC <sub>sw,max</sub> (µg/L) |                            |                          |                                                 |                      |                             |                               | PEC <sub>sed,max</sub> (µg/kg) |                            |
| <b>Step 1</b>               |                              |                            |                          |                                                 |                      |                             |                               |                                |                            |
|                             | 83.859                       | 0.262                      | 0.839                    | 0.210                                           | 0.067                | 0.062                       | 0.081                         | 3140                           | 0.204                      |
| <b>Step 2</b>               |                              |                            |                          |                                                 |                      |                             |                               |                                |                            |
| N-Europe                    | 37.443                       | 0.117                      | 0.374                    | 0.094                                           | 0.030                | 0.028                       | 0.036                         | 1590                           | 0.103                      |
| S-Europe                    | 30.501                       | 0.095                      | 0.305                    | 0.076                                           | 0.024                | 0.023                       | 0.030                         | 1280                           | 0.083                      |
| <b>Step 3</b>               |                              |                            |                          |                                                 |                      |                             |                               |                                |                            |
| D3/ditch                    | 9.005                        | 0.028                      | 0.090                    | 0.023                                           | 0.007                | 0.007                       | 0.009                         | 8.150                          | 0.001                      |
| D3/ditch<br>2 <sup>nd</sup> | 8.998                        | 0.028                      | 0.090                    | 0.022                                           | 0.007                | 0.007                       | 0.009                         | 7.445                          | 0.000                      |
| D4/pond                     | 0.302                        | 0.001                      | 0.003                    | 0.001                                           | 0.000                | 0.000                       | 0.000                         | 5.248                          | 0.000                      |
| D4/stream                   | 7.238                        | 0.023                      | 0.072                    | 0.018                                           | 0.006                | 0.005                       | 0.007                         | 0.538                          | 0.000                      |
| D6/ditch                    | 9.070                        | 0.028                      | 0.091                    | 0.023                                           | 0.007                | 0.007                       | 0.009                         | 32.690                         | 0.002                      |
| R1/pond                     | 0.951                        | 0.003                      | 0.010                    | 0.002                                           | 0.001                | 0.001                       | 0.001                         | 46.630                         | 0.003                      |
| R1/pond<br>2 <sup>nd</sup>  | 1.448                        | 0.005                      | 0.014                    | 0.004                                           | 0.001                | 0.001                       | 0.001                         | 57.330                         | 0.004                      |

**Aquatic organisms: acceptability of risk (PEC/RAC < 1) for Glyphosate for each organism group based on FOCUS Steps 1, 2 and 3 calculations for the use of MON 52276 in vegetables, leafy (1 × 1440 g a.s./ha). Covers uses 1 a-c, 2 a-c, 6 a-b, 10 a-c.**

| Group                        |       | Fish acute                 | Fish prolonged           | Inverteb. acute                          | Inverteb. prolonged  | Algae                       | Aquatic macrophytes           |          | Sed. dwell. prolonged      |
|------------------------------|-------|----------------------------|--------------------------|------------------------------------------|----------------------|-----------------------------|-------------------------------|----------|----------------------------|
| Test species                 |       | <i>Lepomis macrochirus</i> | <i>Brachydanio rerio</i> | <i>Crassostrea gigas / Daphnia magna</i> | <i>Daphnia magna</i> | <i>Skeletonema costatum</i> | <i>Myriophyllum aquaticum</i> |          | <i>Chironomus riparius</i> |
| R1/stream                    | 5.933 | 0.019                      | 0.059                    | 0.015                                    | 0.005                | 0.004                       | 0.006                         | 348.600  | 0.023                      |
| R1/stream<br>2 <sup>nd</sup> | 5.930 | 0.019                      | 0.059                    | 0.015                                    | 0.005                | 0.004                       | 0.006                         | 809.100  | 0.053                      |
| R2/stream                    | 7.968 | 0.025                      | 0.080                    | 0.020                                    | 0.006                | 0.006                       | 0.008                         | 1367.800 | 0.089                      |
| R2/stream<br>2 <sup>nd</sup> | 7.968 | 0.025                      | 0.080                    | 0.020                                    | 0.006                | 0.006                       | 0.008                         | 1515.200 | 0.098                      |
| R3/stream                    | 8.381 | 0.026                      | 0.084                    | 0.021                                    | 0.007                | 0.006                       | 0.008                         | 988.600  | 0.064                      |
| R3/stream<br>2 <sup>nd</sup> | 8.381 | 0.026                      | 0.084                    | 0.021                                    | 0.007                | 0.006                       | 0.008                         | 613.900  | 0.040                      |
| R4/stream                    | 5.934 | 0.019                      | 0.059                    | 0.015                                    | 0.005                | 0.004                       | 0.006                         | 444      | 0.029                      |
| R4/stream<br>2 <sup>nd</sup> | 5.935 | 0.019                      | 0.059                    | 0.015                                    | 0.005                | 0.004                       | 0.006                         | 574.900  | 0.037                      |

AF: Assessment factor; PEC: Predicted environmental concentration; RAC: Regulatory acceptable concentration; PEC/RAC ratios above the relevant trigger of 1 are shown in **bold**

**Aquatic organisms: acceptability of risk (PEC/RAC < 1) for Glyphosate for each organism group based on FOCUS Steps 1, 2 and 3 calculations for the use of MON 52276 in sugar beets (1 × 1440 g a.s./ha). Covers uses 1 a-c, 2 a-c, 6 a-b, 10 a-c.**

| Group           |                              | Fish acute                 | Fish prolonged           | Inverteb. acute                          | Inverteb. prolonged  | Algae                       | Aquatic macrophytes           |                                | Sed. dwell. prolonged      |
|-----------------|------------------------------|----------------------------|--------------------------|------------------------------------------|----------------------|-----------------------------|-------------------------------|--------------------------------|----------------------------|
| Test species    |                              | <i>Lepomis macrochirus</i> | <i>Brachydanio rerio</i> | <i>Crassostrea gigas / Daphnia magna</i> | <i>Daphnia magna</i> | <i>Skeletonema costatum</i> | <i>Myriophyllum aquaticum</i> |                                | <i>Chironomus riparius</i> |
| Endpoint (µg/L) |                              | LC <sub>50</sub><br>32000  | NOEC<br>1000             | EC <sub>50</sub><br>40000                | NOEC<br>12500        | ErC <sub>50</sub><br>13500  | ErC <sub>50</sub><br>10330    | Endpoint (µg/kg)               | NOEC<br>154000             |
| AF              |                              | 100                        | 10                       | 100                                      | 10                   | 10                          | 10                            | AF                             | 10                         |
| RAC (µg/L)      |                              | 320                        | 100                      | 400                                      | 1250                 | 1350                        | 1033                          | RAC (µg/kg)                    | 15400                      |
| FOCUS Scenario  | PEC <sub>sw,max</sub> (µg/L) |                            |                          |                                          |                      |                             |                               | PEC <sub>sed,max</sub> (µg/kg) |                            |
| <b>Step 1</b>   |                              |                            |                          |                                          |                      |                             |                               |                                |                            |
|                 | 83.859                       | 0.262                      | 0.839                    | 0.210                                    | 0.067                | 0.062                       | 0.081                         | 3140                           | 0.204                      |
| <b>Step 2</b>   |                              |                            |                          |                                          |                      |                             |                               |                                |                            |
| N-Europe        | 37.443                       | 0.117                      | 0.374                    | 0.094                                    | 0.030                | 0.028                       | 0.036                         | 1590                           | 0.103                      |
| S-Europe        | 30.501                       | 0.095                      | 0.305                    | 0.076                                    | 0.024                | 0.023                       | 0.030                         | 1280                           | 0.083                      |
| <b>Step 3</b>   |                              |                            |                          |                                          |                      |                             |                               |                                |                            |
| D3/ditch        | 7.421                        | 0.023                      | 0.074                    | 0.019                                    | 0.006                | 0.005                       | 0.007                         | 5.083                          | 0.000                      |
| D4/pond         | 0.292                        | 0.001                      | 0.003                    | 0.001                                    | 0.000                | 0.000                       | 0.000                         | 4.962                          | 0.000                      |
| D4/stream       | 6.505                        | 0.020                      | 0.065                    | 0.016                                    | 0.005                | 0.005                       | 0.006                         | 0.685                          | 0.000                      |
| R1/pond         | 1.219                        | 0.004                      | 0.012                    | 0.003                                    | 0.001                | 0.001                       | 0.001                         | 46.420                         | 0.003                      |
| R1/stream       | 5.146                        | 0.016                      | 0.051                    | 0.013                                    | 0.004                | 0.004                       | 0.005                         | 354.500                        | 0.023                      |
| R3/stream       | 7.267                        | 0.023                      | 0.073                    | 0.018                                    | 0.006                | 0.005                       | 0.007                         | 614.200                        | 0.040                      |

**Aquatic organisms: acceptability of risk (PEC/RAC < 1) for Glyphosate for each organism group based on FOCUS Steps 1, 2 and 3 calculations for the use of MON 52276 in sugar beets (1 × 1440 g a.s./ha). Covers uses 1 a-c, 2 a-c, 6 a-b, 10 a-c.**

| Group        |  | Fish acute                 | Fish prolonged           | Inverteb. acute                          | Inverteb. prolonged  | Algae                       | Aquatic macrophytes           |  | Sed. dwell. prolonged      |
|--------------|--|----------------------------|--------------------------|------------------------------------------|----------------------|-----------------------------|-------------------------------|--|----------------------------|
| Test species |  | <i>Lepomis macrochirus</i> | <i>Brachydanio rerio</i> | <i>Crassostrea gigas / Daphnia magna</i> | <i>Daphnia magna</i> | <i>Skeletonema costatum</i> | <i>Myriophyllum aquaticum</i> |  | <i>Chironomus riparius</i> |

AF: Assessment factor; PEC: Predicted environmental concentration; RAC: Regulatory acceptable concentration; PEC/RAC ratios above the relevant trigger of 1 are shown in **bold**

**Aquatic organisms: acceptability of risk (PEC/RAC < 1) for Glyphosate for each organism group based on FOCUS Steps 1, 2 and 3 calculations for the use of MON 52276 in pome/stone fruit (2 × 1440 g a.s./ha, with application interval of 28 days). Uses 4 a-c.**

| Group           |                              | Fish acute                 | Fish prolonged           | Inverteb. acute                          | Inverteb. prolonged  | Algae                       | Aquatic macrophytes                     |                                | Sed. dwell. prolonged      |
|-----------------|------------------------------|----------------------------|--------------------------|------------------------------------------|----------------------|-----------------------------|-----------------------------------------|--------------------------------|----------------------------|
| Test species    |                              | <i>Lepomis macrochirus</i> | <i>Brachydanio rerio</i> | <i>Crassostrea gigas / Daphnia magna</i> | <i>Daphnia magna</i> | <i>Skeletonema costatum</i> | <i>Myriophyllum aquaticum</i>           |                                | <i>Chironomus riparius</i> |
| Endpoint (µg/L) |                              | LC <sub>50</sub><br>32000  | NOEC<br>1000             | EC <sub>50</sub><br>40000                | NOEC<br>12500        | ErC <sub>50</sub><br>13500  | E <sub>r</sub> C <sub>50</sub><br>10330 | Endpoint (µg/kg)               | NOEC<br>154000             |
| AF              |                              | 100                        | 10                       | 100                                      | 10                   | 10                          | 10                                      | AF                             | 10                         |
| RAC (µg/L)      |                              | 320                        | 100                      | 400                                      | 1250                 | 1350                        | 1033                                    | RAC (µg/kg)                    | 15400                      |
| FOCUS Scenario  | PEC <sub>sw,max</sub> (µg/L) |                            |                          |                                          |                      |                             |                                         | PEC <sub>sed,max</sub> (µg/kg) |                            |
| <b>Step 1</b>   |                              |                            |                          |                                          |                      |                             |                                         |                                |                            |
|                 | 167.718                      | 0.524                      | <b>1.677</b>             | 0.419                                    | 0.134                | 0.124                       | 0.162                                   | 6280                           | 0.408                      |
| <b>Step 2</b>   |                              |                            |                          |                                          |                      |                             |                                         |                                |                            |
| N-Europe        | 69.948                       | 0.219                      | 0.699                    | 0.175                                    | 0.056                | 0.052                       | 0.068                                   | 2970                           | 0.193                      |



**Aquatic organisms: acceptability of risk (PEC/RAC < 1) for Glyphosate for each organism group based on FOCUS Steps 1, 2 and 3 calculations for the use of MON 52276 in pome/stone fruit (2 × 1440 g a.s./ha, with application interval of 28 days). Uses 4 a-c.**

| Group         |        | Fish acute                 | Fish prolonged           | Inverteb. acute                          | Inverteb. prolonged  | Algae                       | Aquatic macrophytes           |         | Sed. dwell. prolonged      |
|---------------|--------|----------------------------|--------------------------|------------------------------------------|----------------------|-----------------------------|-------------------------------|---------|----------------------------|
| Test species  |        | <i>Lepomis macrochirus</i> | <i>Brachydanio rerio</i> | <i>Crassostrea gigas / Daphnia magna</i> | <i>Daphnia magna</i> | <i>Skeletonema costatum</i> | <i>Myriophyllum aquaticum</i> |         | <i>Chironomus riparius</i> |
| S-Europe      | 56.854 | 0.178                      | 0.569                    | 0.142                                    | 0.045                | 0.042                       | 0.055                         | 2400    | 0.156                      |
| <b>Step 3</b> |        |                            |                          |                                          |                      |                             |                               |         |                            |
| D3/ditch      | 3.806  | 0.012                      | 0.038                    | 0.010                                    | 0.003                | 0.003                       | 0.004                         | 6.678   | 0.000                      |
| D4/pond       | 0.276  | 0.001                      | 0.003                    | 0.001                                    | 0.000                | 0.000                       | 0.000                         | 7.236   | 0.000                      |
| D4/stream     | 3.364  | 0.011                      | 0.034                    | 0.008                                    | 0.003                | 0.002                       | 0.003                         | 0.870   | 0.000                      |
| D5/pond       | 0.280  | 0.001                      | 0.003                    | 0.001                                    | 0.000                | 0.000                       | 0.000                         | 6.719   | 0.000                      |
| D5/stream     | 3.716  | 0.012                      | 0.037                    | 0.009                                    | 0.003                | 0.003                       | 0.004                         | 1.711   | 0.000                      |
| R1/pond       | 0.283  | 0.001                      | 0.003                    | 0.001                                    | 0.000                | 0.000                       | 0.000                         | 10.790  | 0.001                      |
| R1/stream     | 4.266  | 0.013                      | 0.043                    | 0.011                                    | 0.003                | 0.003                       | 0.004                         | 9.910   | 0.001                      |
| R2/stream     | 3.530  | 0.011                      | 0.035                    | 0.009                                    | 0.003                | 0.003                       | 0.003                         | 101.400 | 0.007                      |
| R3/stream     | 3.714  | 0.012                      | 0.037                    | 0.009                                    | 0.003                | 0.003                       | 0.004                         | 61.630  | 0.004                      |
| R4/stream     | 6.376  | 0.020                      | 0.064                    | 0.016                                    | 0.005                | 0.005                       | 0.006                         | 45.430  | 0.003                      |

AF: Assessment factor; PEC: Predicted environmental concentration; RAC: Regulatory acceptable concentration; PEC/RAC ratios above the relevant trigger of 1 are shown in **bold**

**Aquatic organisms: acceptability of risk (PEC/RAC < 1) for Glyphosate for each organism group based on FOCUS Steps 1, 2 and 3 calculations for the use of MON 52276 in vines (2 × 1440 g a.s./ha, with application interval of 28 days). Uses 5 a-c.**

| Group           |                              | Fish acute                 | Fish prolonged           | Inverteb. acute                          | Inverteb. prolonged  | Algae                       | Aquatic macrophytes           |                                | Sed. dwell. prolonged      |
|-----------------|------------------------------|----------------------------|--------------------------|------------------------------------------|----------------------|-----------------------------|-------------------------------|--------------------------------|----------------------------|
| Test species    |                              | <i>Lepomis macrochirus</i> | <i>Brachydanio rerio</i> | <i>Crassostrea gigas / Daphnia magna</i> | <i>Daphnia magna</i> | <i>Skeletonema costatum</i> | <i>Myriophyllum aquaticum</i> |                                | <i>Chironomus riparius</i> |
| Endpoint (µg/L) |                              | LC <sub>50</sub><br>32000  | NOEC<br>1000             | EC <sub>50</sub><br>40000                | NOEC<br>12500        | ErC <sub>50</sub><br>13500  | ErC <sub>50</sub><br>10330    | Endpoint (µg/kg)               | NOEC<br>154000             |
| AF              |                              | 100                        | 10                       | 100                                      | 10                   | 10                          | 10                            | AF                             | 10                         |
| RAC (µg/L)      |                              | 320                        | 100                      | 400                                      | 1250                 | 1350                        | 1033                          | RAC (µg/kg)                    | 15400                      |
| FOCUS Scenario  | PEC <sub>sw,max</sub> (µg/L) |                            |                          |                                          |                      |                             |                               | PEC <sub>sed,max</sub> (µg/kg) |                            |
| <b>Step 1</b>   |                              |                            |                          |                                          |                      |                             |                               |                                |                            |
|                 | 167.718                      | 0.524                      | <b>1.677</b>             | 0.419                                    | 0.134                | 0.124                       | 0.162                         | 6280                           | 0.408                      |
| <b>Step 2</b>   |                              |                            |                          |                                          |                      |                             |                               |                                |                            |
| N-Europe        | 69.948                       | 0.219                      | 0.699                    | 0.175                                    | 0.056                | 0.052                       | 0.068                         | 2970                           | 0.193                      |
| S-Europe        | 56.854                       | 0.178                      | 0.569                    | 0.142                                    | 0.045                | 0.042                       | 0.055                         | 2400                           | 0.156                      |
| <b>Step 3</b>   |                              |                            |                          |                                          |                      |                             |                               |                                |                            |
| D6/ditch        | 3.822                        | 0.012                      | 0.038                    | 0.010                                    | 0.003                | 0.003                       | 0.004                         | 21.120                         | 0.001                      |
| R1/pond         | 0.283                        | 0.001                      | 0.003                    | 0.001                                    | 0.000                | 0.000                       | 0.000                         | 10.770                         | 0.001                      |
| R1/stream       | 4.123                        | 0.013                      | 0.041                    | 0.010                                    | 0.003                | 0.003                       | 0.004                         | 9.906                          | 0.001                      |
| R2/stream       | 3.530                        | 0.011                      | 0.035                    | 0.009                                    | 0.003                | 0.003                       | 0.003                         | 101.400                        | 0.007                      |
| R3/stream       | 3.714                        | 0.012                      | 0.037                    | 0.009                                    | 0.003                | 0.003                       | 0.004                         | 61.620                         | 0.004                      |
| R4/stream       | 8.306                        | 0.026                      | 0.083                    | 0.021                                    | 0.007                | 0.006                       | 0.008                         | 49.080                         | 0.003                      |

**Aquatic organisms: acceptability of risk (PEC/RAC < 1) for Glyphosate for each organism group based on FOCUS Steps 1, 2 and 3 calculations for the use of MON 52276 in vines (2 × 1440 g a.s./ha, with application interval of 28 days). Uses 5 a-c.**

| Group        |  | Fish acute                 | Fish prolonged           | Inverteb. acute                          | Inverteb. prolonged  | Algae                       | Aquatic macrophytes           |  | Sed. dwell. prolonged      |
|--------------|--|----------------------------|--------------------------|------------------------------------------|----------------------|-----------------------------|-------------------------------|--|----------------------------|
| Test species |  | <i>Lepomis macrochirus</i> | <i>Brachydanio rerio</i> | <i>Crassostrea gigas / Daphnia magna</i> | <i>Daphnia magna</i> | <i>Skeletonema costatum</i> | <i>Myriophyllum aquaticum</i> |  | <i>Chironomus riparius</i> |

AF: Assessment factor; PEC: Predicted environmental concentration; RAC: Regulatory acceptable concentration; PEC/RAC ratios above the relevant trigger of 1 are shown in **bold**

**Aquatic organisms: acceptability of risk (PEC/RAC < 1) for Glyphosate for each organism group based on FOCUS Steps 1, 2 and 3 calculations for the use of MON 52276 in olives (2 × 1440 g a.s./ha, with application interval of 28 days). Uses 4 a-c.**

| Group           |                              | Fish acute                 | Fish prolonged           | Inverteb. acute                          | Inverteb. prolonged  | Algae                       | Aquatic macrophytes           |                                | Sed. dwell. prolonged      |
|-----------------|------------------------------|----------------------------|--------------------------|------------------------------------------|----------------------|-----------------------------|-------------------------------|--------------------------------|----------------------------|
| Test species    |                              | <i>Lepomis macrochirus</i> | <i>Brachydanio rerio</i> | <i>Crassostrea gigas / Daphnia magna</i> | <i>Daphnia magna</i> | <i>Skeletonema costatum</i> | <i>Myriophyllum aquaticum</i> |                                | <i>Chironomus riparius</i> |
| Endpoint (µg/L) |                              | LC <sub>50</sub><br>32000  | NOEC<br>1000             | EC <sub>50</sub><br>40000                | NOEC<br>12500        | ErC <sub>50</sub><br>13500  | ErC <sub>50</sub><br>10330    | Endpoint (µg/kg)               | NOEC<br>154000             |
| AF              |                              | 100                        | 10                       | 100                                      | 10                   | 10                          | 10                            | AF                             | 10                         |
| RAC (µg/L)      |                              | 320                        | 100                      | 400                                      | 1250                 | 1350                        | 1033                          | RAC (µg/kg)                    | 15400                      |
| FOCUS Scenario  | PEC <sub>sw,max</sub> (µg/L) |                            |                          |                                          |                      |                             |                               | PEC <sub>sed,max</sub> (µg/kg) |                            |
| <b>Step 1</b>   |                              |                            |                          |                                          |                      |                             |                               |                                |                            |
|                 | 167.718                      | 0.524                      | <b>1.677</b>             | 0.419                                    | 0.134                | 0.124                       | 0.162                         | 6280                           | 0.408                      |
| <b>Step 2</b>   |                              |                            |                          |                                          |                      |                             |                               |                                |                            |
| N-Europe        | 69.948                       | 0.219                      | 0.699                    | 0.175                                    | 0.056                | 0.052                       | 0.068                         | 2970                           | 0.193                      |

**Aquatic organisms: acceptability of risk (PEC/RAC < 1) for Glyphosate for each organism group based on FOCUS Steps 1, 2 and 3 calculations for the use of MON 52276 in olives (2 × 1440 g a.s./ha, with application interval of 28 days). Uses 4 a-c.**

| Group         |        | Fish acute                 | Fish prolonged           | Inverteb. acute                          | Inverteb. prolonged  | Algae                       | Aquatic macrophytes           |        | Sed. dwell. prolonged      |
|---------------|--------|----------------------------|--------------------------|------------------------------------------|----------------------|-----------------------------|-------------------------------|--------|----------------------------|
| Test species  |        | <i>Lepomis macrochirus</i> | <i>Brachydanio rerio</i> | <i>Crassostrea gigas / Daphnia magna</i> | <i>Daphnia magna</i> | <i>Skeletonema costatum</i> | <i>Myriophyllum aquaticum</i> |        | <i>Chironomus riparius</i> |
| S-Europe      | 56.854 | 0.178                      | 0.569                    | 0.142                                    | 0.045                | 0.042                       | 0.055                         | 2400   | 0.156                      |
| <b>Step 3</b> |        |                            |                          |                                          |                      |                             |                               |        |                            |
| D6/ditch      | 3.822  | 0.012                      | 0.038                    | 0.010                                    | 0.003                | 0.003                       | 0.004                         | 21.090 | 0.001                      |
| R4/stream     | 8.714  | 0.027                      | 0.087                    | 0.022                                    | 0.007                | 0.006                       | 0.008                         | 55.440 | 0.004                      |

AF: Assessment factor; PEC: Predicted environmental concentration; RAC: Regulatory acceptable concentration; PEC/RAC ratios above the relevant trigger of 1 are shown in **bold**

**Aquatic organisms: acceptability of risk (PEC/RAC < 1) for AMPA for each organism group based on FOCUS Steps 1, 2 and 3 calculations for the use of MON 52276 in field crops<sup>1</sup> (1 × 1440 g a.s./ha). Covers uses 1 a-c, 2 a-c, 6 a-b, 10 a-c.**

| Group                                            |                              | Fish acute                 | Fish prolonged             | Inverteb. acute            | Inverteb. prolonged  | Algae                                   | Aquatic macrophytes                     |                                | Sed. dwell. prolonged      |
|--------------------------------------------------|------------------------------|----------------------------|----------------------------|----------------------------|----------------------|-----------------------------------------|-----------------------------------------|--------------------------------|----------------------------|
| Test species                                     |                              | <i>Oncorhynchus mykiss</i> | <i>Pimephales promelas</i> | <i>Daphnia magna</i>       | <i>Daphnia magna</i> | <i>Pseudokirchneriella subcapitata</i>  | <i>Myriophyllum aquaticum</i>           |                                | <i>Chironomus riparius</i> |
| Endpoint (µg/L)                                  |                              | LC <sub>50</sub><br>100000 | NOEC<br>12000              | EC <sub>50</sub><br>690000 | NOEC<br>15000        | E <sub>r</sub> C <sub>50</sub><br>31900 | E <sub>r</sub> C <sub>50</sub><br>72000 | Endpoint (µg/kg)               | NOEC<br>786500             |
| AF                                               |                              | 100                        | 10                         | 100                        | 10                   | 10                                      | 10                                      | AF                             | 10                         |
| RAC (µg/L)                                       |                              | 1000                       | 1200                       | 6900                       | 1500                 | 3190                                    | 7200                                    | RAC (µg/kg)                    | 78650                      |
| FOCUS Scenario                                   | PEC <sub>sw,max</sub> (µg/L) |                            |                            |                            |                      |                                         |                                         | PEC <sub>sed,max</sub> (µg/kg) |                            |
| <b>Step 1 (DT<sub>50</sub> wat/sed = 89.9 d)</b> |                              |                            |                            |                            |                      |                                         |                                         |                                |                            |

**Aquatic organisms: acceptability of risk (PEC/RAC < 1) for AMPA for each organism group based on FOCUS Steps 1, 2 and 3 calculations for the use of MON 52276 in field crops<sup>1</sup> (1 × 1440 g a.s./ha). Covers uses 1 a-c, 2 a-c, 6 a-b, 10 a-c.**

| Group                                            |        | Fish acute                 | Fish prolonged             | Inverteb. acute      | Inverteb. prolonged  | Algae                                  | Aquatic macrophytes           |         | Sed. dwell. prolonged      |
|--------------------------------------------------|--------|----------------------------|----------------------------|----------------------|----------------------|----------------------------------------|-------------------------------|---------|----------------------------|
| Test species                                     |        | <i>Oncorhynchus mykiss</i> | <i>Pimephales promelas</i> | <i>Daphnia magna</i> | <i>Daphnia magna</i> | <i>Pseudokirchneriella subcapitata</i> | <i>Myriophyllum aquaticum</i> |         | <i>Chironomus riparius</i> |
|                                                  | 66.996 | 0.067                      | 0.056                      | 0.010                | 0.045                | 0.021                                  | 0.009                         | 1640    | 0.021                      |
| <b>Step 2 (DT<sub>50</sub> wat/sed = 89.9 d)</b> |        |                            |                            |                      |                      |                                        |                               |         |                            |
| N-Europe                                         | 32.804 | 0.033                      | 0.027                      | 0.005                | 0.022                | 0.010                                  | 0.005                         | 827.394 | 0.011                      |
| S-Europe                                         | 26.384 | 0.026                      | 0.022                      | 0.004                | 0.018                | 0.008                                  | 0.004                         | 664.272 | 0.008                      |

AF: Assessment factor; PEC: Predicted environmental concentration; RAC: Regulatory acceptable concentration; PEC/RAC ratios above the relevant trigger of 1 are shown in **bold**

<sup>1</sup> covering all corresponding uses in root vegetables, potatoes, bulb vegetables, fruiting vegetables, leafy vegetables and sugar beets

**Aquatic organisms: acceptability of risk (PEC/RAC < 1) for AMPA for each organism group based on FOCUS Steps 1, 2 and 3 calculations for the use of MON 52276 in orchards<sup>1</sup> (2 × 1440 g a.s./ha, with application interval of 28 days). Uses 4 a-c.**

| Group                                            |                              | Fish acute                 | Fish prolonged             | Inverteb. acute            | Inverteb. prolonged  | Algae                                   | Aquatic macrophytes                     |                                | Sed. dwell. prolonged      |
|--------------------------------------------------|------------------------------|----------------------------|----------------------------|----------------------------|----------------------|-----------------------------------------|-----------------------------------------|--------------------------------|----------------------------|
| Test species                                     |                              | <i>Oncorhynchus mykiss</i> | <i>Pimephales promelas</i> | <i>Daphnia magna</i>       | <i>Daphnia magna</i> | <i>Pseudokirchneriella subcapitata</i>  | <i>Myriophyllum aquaticum</i>           |                                | <i>Chironomus riparius</i> |
| Endpoint (µg/L)                                  |                              | LC <sub>50</sub><br>100000 | NOEC<br>12000              | EC <sub>50</sub><br>690000 | NOEC<br>15000        | E <sub>r</sub> C <sub>50</sub><br>31900 | E <sub>r</sub> C <sub>50</sub><br>72000 | Endpoint (µg/kg)               | NOEC<br>786500             |
| AF                                               |                              | 100                        | 10                         | 100                        | 10                   | 10                                      | 10                                      | AF                             | 10                         |
| RAC (µg/L)                                       |                              | 1000                       | 1200                       | 6900                       | 1500                 | 3190                                    | 7200                                    | RAC (µg/kg)                    | 78650                      |
| FOCUS Scenario                                   | PEC <sub>sw,max</sub> (µg/L) |                            |                            |                            |                      |                                         |                                         | PEC <sub>sed,max</sub> (µg/kg) |                            |
| <b>Step 1 (DT<sub>50</sub> wat/sed = 89.9 d)</b> |                              |                            |                            |                            |                      |                                         |                                         |                                |                            |

**Aquatic organisms: acceptability of risk (PEC/RAC < 1) for AMPA for each organism group based on FOCUS Steps 1, 2 and 3 calculations for the use of MON 52276 in orchards<sup>1</sup> (2 × 1440 g a.s./ha, with application interval of 28 days). Uses 4 a-c.**

| Group                                            |         | Fish acute                 | Fish prolonged             | Inverteb. acute      | Inverteb. prolonged  | Algae                                  | Aquatic macrophytes           |      | Sed. dwell. prolonged      |
|--------------------------------------------------|---------|----------------------------|----------------------------|----------------------|----------------------|----------------------------------------|-------------------------------|------|----------------------------|
| Test species                                     |         | <i>Oncorhynchus mykiss</i> | <i>Pimephales promelas</i> | <i>Daphnia magna</i> | <i>Daphnia magna</i> | <i>Pseudokirchneriella subcapitata</i> | <i>Myriophyllum aquaticum</i> |      | <i>Chironomus riparius</i> |
|                                                  | 133.991 | 0.134                      | 0.112                      | 0.019                | 0.089                | 0.042                                  | 0.019                         | 3290 | 0.042                      |
| <b>Step 2 (DT<sub>50</sub> wat/sed = 89.9 d)</b> |         |                            |                            |                      |                      |                                        |                               |      |                            |
| N-Europe                                         | 63.817  | 0.064                      | 0.053                      | 0.009                | 0.043                | 0.020                                  | 0.009                         | 1610 | 0.020                      |
| S-Europe                                         | 51.278  | 0.051                      | 0.043                      | 0.007                | 0.034                | 0.016                                  | 0.007                         | 1290 | 0.016                      |

AF: Assessment factor; PEC: Predicted environmental concentration; RAC: Regulatory acceptable concentration; PEC/RAC ratios above the relevant trigger of 1 are shown in **bold**

<sup>1</sup> covering all corresponding uses in pome/stone fruit and olives

**Aquatic organisms: acceptability of risk (PEC/RAC < 1) for AMPA for each organism group based on FOCUS Steps 1, 2 and 3 calculations for the use of MON 52276 in vines (2 × 1440 g a.s./ha, with application interval of 28 days). Uses 5 a-c.**

| Group           |                              | Fish acute                 | Fish prolonged             | Inverteb. acute            | Inverteb. prolonged  | Algae                                   | Aquatic macrophytes                     |                                | Sed. dwell. prolonged      |
|-----------------|------------------------------|----------------------------|----------------------------|----------------------------|----------------------|-----------------------------------------|-----------------------------------------|--------------------------------|----------------------------|
| Test species    |                              | <i>Oncorhynchus mykiss</i> | <i>Pimephales promelas</i> | <i>Daphnia magna</i>       | <i>Daphnia magna</i> | <i>Pseudokirchneriella subcapitata</i>  | <i>Myriophyllum aquaticum</i>           |                                | <i>Chironomus riparius</i> |
| Endpoint (µg/L) |                              | LC <sub>50</sub><br>100000 | NOEC<br>12000              | EC <sub>50</sub><br>690000 | NOEC<br>15000        | E <sub>r</sub> C <sub>50</sub><br>31900 | E <sub>r</sub> C <sub>50</sub><br>72000 | <b>Endpoint (µg/kg)</b>        | NOEC<br>786500             |
| AF              |                              | 100                        | 10                         | 100                        | 10                   | 10                                      | 10                                      | <b>AF</b>                      | 10                         |
| RAC (µg/L)      |                              | 1000                       | 1200                       | 6900                       | 1500                 | 3190                                    | 7200                                    | <b>RAC (µg/kg)</b>             | 78650                      |
| FOCUS Scenario  | PEC <sub>sw,max</sub> (µg/L) |                            |                            |                            |                      |                                         |                                         | PEC <sub>sed,max</sub> (µg/kg) |                            |

**Aquatic organisms: acceptability of risk (PEC/RAC < 1) for AMPA for each organism group based on FOCUS Steps 1, 2 and 3 calculations for the use of MON 52276 in vines (2 × 1440 g a.s./ha, with application interval of 28 days). Uses 5 a-c.**

| Group                                            |         | Fish acute                 | Fish prolonged             | Inverteb. acute      | Inverteb. prolonged  | Algae                                  | Aquatic macrophytes           |      | Sed. dwell. prolonged      |
|--------------------------------------------------|---------|----------------------------|----------------------------|----------------------|----------------------|----------------------------------------|-------------------------------|------|----------------------------|
| Test species                                     |         | <i>Oncorhynchus mykiss</i> | <i>Pimephales promelas</i> | <i>Daphnia magna</i> | <i>Daphnia magna</i> | <i>Pseudokirchneriella subcapitata</i> | <i>Myriophyllum aquaticum</i> |      | <i>Chironomus riparius</i> |
| <b>Step 1 (DT<sub>50</sub> wat/sed = 89.9 d)</b> |         |                            |                            |                      |                      |                                        |                               |      |                            |
|                                                  | 133.991 | 0.134                      | 0.112                      | 0.019                | 0.089                | 0.042                                  | 0.019                         | 3290 | 0.042                      |
| <b>Step 2 (DT<sub>50</sub> wat/sed = 89.9 d)</b> |         |                            |                            |                      |                      |                                        |                               |      |                            |
| N-Europe                                         | 63.817  | 0.064                      | 0.053                      | 0.009                | 0.043                | 0.020                                  | 0.009                         | 1610 | 0.020                      |
| S-Europe                                         | 51.278  | 0.051                      | 0.043                      | 0.007                | 0.034                | 0.016                                  | 0.007                         | 1290 | 0.016                      |

AF: Assessment factor; PEC: Predicted environmental concentration; RAC: Regulatory acceptable concentration; PEC/RAC ratios above the relevant trigger of 1 are shown in **bold**

**Aquatic organisms: acceptability of risk (PEC/RAC < 1) for HMPA for each organism group based on FOCUS Steps 1, 2 and 3 calculations for the use of MON 52276 in field crops<sup>1</sup> (1 × 1440 g a.s./ha). Covers uses 1 a-c, 2 a-c, 6 a-b, 10 a-c.**

| Group           |                              | Fish acute                | Inverteb. acute            | Algae                                    | Aquatic macrophytes                      |                                | Sed. dwell. prolonged                   |
|-----------------|------------------------------|---------------------------|----------------------------|------------------------------------------|------------------------------------------|--------------------------------|-----------------------------------------|
| Test species    |                              | -                         | <i>Daphnia magna</i>       | <i>Pseudokirchneriella subcapitata</i>   | <i>Lemna gibba</i>                       |                                | <i>Chironomus riparius</i> <sup>§</sup> |
| Endpoint (µg/L) |                              | LC <sub>50</sub><br>32000 | EC <sub>50</sub><br>100000 | E <sub>r</sub> C <sub>50</sub><br>120000 | E <sub>r</sub> C <sub>50</sub><br>123000 | Endpoint (µg/kg)               | NOEC<br>15400 µg/kg sed.                |
| AF              |                              | 100                       | 100                        | 10                                       | 10                                       | AF                             | 10                                      |
| RAC (µg/L)      |                              | 320                       | 1000                       | 12000                                    | 12300                                    | RAC (µg/kg)                    | 1540 µg/kg sed.                         |
| FOCUS Scenario  | PEC <sub>sw,max</sub> (µg/L) |                           |                            |                                          |                                          | PEC <sub>sed,max</sub> (µg/kg) |                                         |
| <b>Step 1</b>   |                              |                           |                            |                                          |                                          |                                |                                         |

**Aquatic organisms: acceptability of risk (PEC/RAC < 1) for HMPA for each organism group based on FOCUS Steps 1, 2 and 3 calculations for the use of MON 52276 in field crops<sup>1</sup> (1 × 1440 g a.s./ha). Covers uses 1 a-c, 2 a-c, 6 a-b, 10 a-c.**

| Group         |        | Fish acute | Inverteb. acute      | Algae                                  | Aquatic macrophytes |        | Sed. dwell. prolonged                   |
|---------------|--------|------------|----------------------|----------------------------------------|---------------------|--------|-----------------------------------------|
| Test species  |        | -          | <i>Daphnia magna</i> | <i>Pseudokirchneriella subcapitata</i> | <i>Lemna gibba</i>  |        | <i>Chironomus riparius</i> <sup>§</sup> |
|               | 32.256 | 0.101      | 0.032                | 0.003                                  | 0.003               | 227.81 | 0.148                                   |
| <b>Step 2</b> |        |            |                      |                                        |                     |        |                                         |
| N-Europe      | 16.289 | 0.051      | 0.016                | 0.001                                  | 0.001               | 115.05 | 0.075                                   |
| S-Europe      | 13.205 | 0.041      | 0.013                | 0.001                                  | 0.001               | 93.26  | 0.061                                   |

AF: Assessment factor; PEC: Predicted environmental concentration; RAC: Regulatory acceptable concentration; PEC/RAC ratios above the relevant trigger of 1 are shown in **bold**

<sup>1</sup> covering all corresponding uses in root vegetables, potatoes, bulb vegetables, fruiting vegetables, leafy vegetables and sugar beets

<sup>§</sup> added following open point of section 4 (expert consultation 4.2): “RMS to update the PEC sediment calculations for HMPA using a default Koc value of 10000 mL/g and to include the metabolite HMPA in the residue definition for sediment in both an update to the RAR and the list of endpoints.” As worst case the metabolite was considered 10 times more toxic than glyphosate.

**Aquatic organisms: acceptability of risk (PEC/RAC < 1) for HMPA for each organism group based on FOCUS Steps 1, 2 and 3 calculations for the use of MON 52276 in orchards<sup>1</sup> (2 × 1440 g a.s./ha, with application interval of 28 days). Uses 4 a-c.**

| Group           |  | Fish acute                | Inverteb. acute            | Algae                                    | Aquatic macrophytes                      |                  | Sed. dwell. prolonged                   |
|-----------------|--|---------------------------|----------------------------|------------------------------------------|------------------------------------------|------------------|-----------------------------------------|
| Test species    |  | -                         | <i>Daphnia magna</i>       | <i>Pseudokirchneriella subcapitata</i>   | <i>Lemna gibba</i>                       |                  | <i>Chironomus riparius</i> <sup>§</sup> |
| Endpoint (µg/L) |  | LC <sub>50</sub><br>32000 | EC <sub>50</sub><br>100000 | E <sub>r</sub> C <sub>50</sub><br>120000 | E <sub>r</sub> C <sub>50</sub><br>123000 | Endpoint (µg/kg) | NOEC<br>15400 µg/kg sed.                |
| AF              |  | 100                       | 100                        | 10                                       | 10                                       | AF               | 10                                      |
| RAC (µg/L)      |  | 320                       | 1000                       | 12000                                    | 12300                                    | RAC (µg/kg)      | 1540 µg/kg sed.                         |



**Aquatic organisms: acceptability of risk (PEC/RAC < 1) for HMPA for each organism group based on FOCUS Steps 1, 2 and 3 calculations for the use of MON 52276 in orchards<sup>1</sup> (2 × 1440 g a.s./ha, with application interval of 28 days). Uses 4 a-c.**

| Group          |                              | Fish acute | Inverteb. acute      | Algae                                  | Aquatic macrophytes |                                | Sed. dwell. prolonged                    |
|----------------|------------------------------|------------|----------------------|----------------------------------------|---------------------|--------------------------------|------------------------------------------|
| Test species   |                              | -          | <i>Daphnia magna</i> | <i>Pseudokirchneriella subcapitata</i> | <i>Lemna gibba</i>  |                                | <i>Chironomus riparius</i> <sup>\$</sup> |
| FOCUS Scenario | PEC <sub>sw,max</sub> (µg/L) |            |                      |                                        |                     | PEC <sub>sed,max</sub> (µg/kg) |                                          |
| <b>Step 1</b>  |                              |            |                      |                                        |                     |                                |                                          |
|                | 64.513                       | 0.202      | 0.065                | 0.005                                  | 0.005               | 455.62                         | 0.296                                    |
| <b>Step 2</b>  |                              |            |                      |                                        |                     |                                |                                          |
| N-Europe       | 30.610                       | 0.096      | 0.031                | 0.003                                  | 0.002               | 216.22                         | 0.140                                    |
| S-Europe       | 24.791                       | 0.077      | 0.025                | 0.002                                  | 0.002               | 175.11                         | 0.114                                    |

AF: Assessment factor; PEC: Predicted environmental concentration; RAC: Regulatory acceptable concentration; PEC/RAC ratios above the relevant trigger of 1 are shown in **bold**

<sup>1</sup> covering all corresponding uses in pome/stone fruit and olives

<sup>\$</sup> added following open point of section 4 (expert consultation 4.2): “RMS to update the PEC sediment calculations for HMPA using a default Koc value of 10000 mL/g and to include the metabolite HMPA in the residue definition for sediment in both an update to the RAR and the list of endpoints.” As worst case the metabolite was considered 10 times more toxic than glyphosate.

**Aquatic organisms: acceptability of risk (PEC/RAC < 1) for HMPA for each organism group based on FOCUS Steps 1, 2 and 3 calculations for the use in of MON 52276 vines (2 × 1440 g a.s./ha, with application interval of 28 days). Uses 5 a-c.**

| Group           |  | Fish acute                | Inverteb. acute            | Algae                                    | Aquatic macrophytes                      |                  | Sed. dwell. prolonged                    |
|-----------------|--|---------------------------|----------------------------|------------------------------------------|------------------------------------------|------------------|------------------------------------------|
| Test species    |  | -                         | <i>Daphnia magna</i>       | <i>Pseudokirchneriella subcapitata</i>   | <i>Lemna gibba</i>                       |                  | <i>Chironomus riparius</i> <sup>\$</sup> |
| Endpoint (µg/L) |  | LC <sub>50</sub><br>32000 | EC <sub>50</sub><br>100000 | E <sub>r</sub> C <sub>50</sub><br>120000 | E <sub>r</sub> C <sub>50</sub><br>123000 | Endpoint (µg/kg) | NOEC<br>15400 µg/kg sed.                 |

**Aquatic organisms: acceptability of risk (PEC/RAC < 1) for HMPA for each organism group based on FOCUS Steps 1, 2 and 3 calculations for the use in of MON 52276 vines (2 × 1440 g a.s./ha, with application interval of 28 days). Uses 5 a-c.**

| Group          |                              | Fish acute | Inverteb. acute      | Algae                                  | Aquatic macrophytes |                                      | Sed. dwell. prolonged                   |
|----------------|------------------------------|------------|----------------------|----------------------------------------|---------------------|--------------------------------------|-----------------------------------------|
| Test species   |                              | -          | <i>Daphnia magna</i> | <i>Pseudokirchneriella subcapitata</i> | <i>Lemna gibba</i>  |                                      | <i>Chironomus riparius</i> <sup>§</sup> |
| AF             |                              | 100        | 100                  | 10                                     | 10                  | <b>AF</b>                            | 10                                      |
| RAC (µg/L)     |                              | 320        | 1000                 | 12000                                  | 12300               | <b>RAC (µg/kg)</b>                   | 1540 µg/kg sed.                         |
| FOCUS Scenario | PEC <sub>sw,max</sub> (µg/L) |            |                      |                                        |                     | <b>PEC<sub>sed,max</sub> (µg/kg)</b> |                                         |
| <b>Step 1</b>  |                              |            |                      |                                        |                     |                                      |                                         |
|                | 64.513                       | 0.202      | 0.065                | 0.005                                  | 0.005               | 455.62                               | 0.296                                   |
| <b>Step 2</b>  |                              |            |                      |                                        |                     |                                      |                                         |
| N-Europe       | 30.610                       | 0.096      | 0.031                | 0.003                                  | 0.002               | 216.22                               | 0.140                                   |
| S-Europe       | 24.791                       | 0.077      | 0.025                | 0.002                                  | 0.002               | 175.11                               | 0.114                                   |

AF: Assessment factor; PEC: Predicted environmental concentration; RAC: Regulatory acceptable concentration; PEC/RAC ratios above the relevant trigger of 1 are shown in **bold**

<sup>§</sup> added following open point of section 4 (expert consultation 4.2): “RMS to update the PEC sediment calculations for HMPA using a default Koc value of 10000 mL/g and to include the metabolite HMPA in the residue definition for sediment in both an update to the RAR and the list of endpoints.” As worst case the metabolite was considered 10 times more toxic than glyphosate.

**Aquatic organisms: acceptability of risk (PEC/RAC < 1) for P1a and M3.3 for sediment dwellers based on FOCUS Steps 1, 2 and 3 calculations for the use of MON 52276 in field crops<sup>1</sup> (1 × 1440 g a.s./ha). Covers uses 1 a-c, 2 a-c, 6 a-b, 10 a-c.**

| Group              |                                | Sed. dwell. prolonged      |
|--------------------|--------------------------------|----------------------------|
| Test species       |                                | <i>Chironomus riparius</i> |
| Endpoint<br>(µg/L) | Endpoint<br>(µg/kg)            | NOEC*<br>78650             |
| AF                 | AF                             | 10                         |
| RAC (µg/L)         | RAC (µg/kg)                    | 7865                       |
| FOCUS Scenario     | PEC <sub>sed,max</sub> (µg/kg) |                            |
| <b>Step 1</b>      |                                |                            |
|                    | 366.051                        | 0.047                      |
| <b>Step 2</b>      |                                |                            |
| N-Europe           | 184.872                        | 0.024                      |
| S-Europe           | 149.857                        | 0.019                      |

AF: Assessment factor; PEC: Predicted environmental concentration; RAC: Regulatory acceptable concentration; PEC/RAC ratios above the relevant trigger of 1 are shown in **bold**

<sup>1</sup> covering all corresponding uses in root vegetables, potatoes, bulb vegetables, fruiting vegetables, leafy vegetables and sugar beets

\* considered ten times more toxic than AMPA

**Aquatic organisms: acceptability of risk (PEC/RAC < 1) for P1a and M3.3 for sediment dwellers based on FOCUS Steps 1, 2 and 3 calculations for the use of MON 52276 in orchards<sup>1</sup> (2 × 1440 g a.s./ha, with application interval of 28 days). Uses 4 a-c.**

| Group              |                     | Sed. dwell. prolonged      |
|--------------------|---------------------|----------------------------|
| Test species       |                     | <i>Chironomus riparius</i> |
| Endpoint<br>(µg/L) | Endpoint<br>(µg/kg) | NOEC*<br>78650             |

**Aquatic organisms: acceptability of risk (PEC/RAC < 1) for P1a and M3.3 for sediment dwellers based on FOCUS Steps 1, 2 and 3 calculations for the use of MON 52276 in orchards<sup>1</sup> (2 × 1440 g a.s./ha, with application interval of 28 days). Uses 4 a-c.**

|                       |                                      |                              |
|-----------------------|--------------------------------------|------------------------------|
| <b>Group</b>          |                                      | <b>Sed. dwell. prolonged</b> |
| <b>Test species</b>   |                                      | <i>Chironomus riparius</i>   |
| <b>AF</b>             | <b>AF</b>                            | 10                           |
| <b>RAC (µg/L)</b>     | <b>RAC (µg/kg)</b>                   | 7865                         |
| <b>FOCUS Scenario</b> | <b>PEC<sub>sed,max</sub> (µg/kg)</b> |                              |
| <b>Step 1</b>         |                                      |                              |
|                       | 732.102                              | 0.093                        |
| <b>Step 2</b>         |                                      |                              |
| N-Europe              | 347.414                              | 0.044                        |
| S-Europe              | 281.362                              | 0.036                        |

AF: Assessment factor; PEC: Predicted environmental concentration; RAC: Regulatory acceptable concentration; PEC/RAC ratios above the relevant trigger of 1 are shown in **bold**

<sup>1</sup> covering all corresponding uses in pome/stone fruit and olives

\* considered ten times more toxic than AMPA

**Aquatic organisms: acceptability of risk (PEC/RAC < 1) for P1a and M3.3 for sediment dwellers based on FOCUS Steps 1, 2 and 3 calculations for the use of MON 52276 in vines (2 × 1440 g a.s./ha, with application interval of 28 days). Uses 5 a-c.**

|                        |                         |                              |
|------------------------|-------------------------|------------------------------|
| <b>Group</b>           |                         | <b>Sed. dwell. prolonged</b> |
| <b>Test species</b>    |                         | <i>Chironomus riparius</i>   |
| <b>Endpoint (µg/L)</b> | <b>Endpoint (µg/kg)</b> | NOEC*<br>78650               |
| <b>AF</b>              | <b>AF</b>               | 10                           |
| <b>RAC (µg/L)</b>      | <b>RAC (µg/kg)</b>      | 7865                         |

**Aquatic organisms: acceptability of risk (PEC/RAC < 1) for P1a and M3.3 for sediment dwellers based on FOCUS Steps 1, 2 and 3 calculations for the use of MON 52276 in vines (2 × 1440 g a.s./ha, with application interval of 28 days). Uses 5 a-c.**

| Group          |                                | Sed. dwell. prolonged      |
|----------------|--------------------------------|----------------------------|
| Test species   |                                | <i>Chironomus riparius</i> |
| FOCUS Scenario | PEC <sub>sed,max</sub> (µg/kg) |                            |
| <b>Step 1</b>  |                                |                            |
|                | 732.102                        | 0.093                      |
| <b>Step 2</b>  |                                |                            |
| N-Europe       | 347.414                        | 0.044                      |
| S-Europe       | 281.362                        | 0.036                      |

AF: Assessment factor; PEC: Predicted environmental concentration; RAC: Regulatory acceptable concentration; PEC/RAC ratios above the relevant trigger of 1 are shown in **bold**

\* considered ten times more toxic than AMPA

**Aquatic organisms: acceptability of risk (PEC/RAC < 1) for Glyphosate for each organism group based on FOCUS Steps 1, 2 and 3 calculations for the use of MON 52276 in grass/alfalfa, (1 × 1800 g a.s./ha). Uses 8 and 9.**

| Group           |  | Fish acute                 | Fish prolonged           | Inverteb. acute                          | Inverteb. prolonged  | Algae                       | Aquatic macrophytes           |                         | Sed. dwell. prolonged      |
|-----------------|--|----------------------------|--------------------------|------------------------------------------|----------------------|-----------------------------|-------------------------------|-------------------------|----------------------------|
| Test species    |  | <i>Lepomis macrochirus</i> | <i>Brachydanio rerio</i> | <i>Crassostrea gigas / Daphnia magna</i> | <i>Daphnia magna</i> | <i>Skeletonema costatum</i> | <i>Myriophyllum aquaticum</i> |                         | <i>Chironomus riparius</i> |
| Endpoint (µg/L) |  | LC <sub>50</sub><br>32000  | NOEC<br>1000             | EC <sub>50</sub><br>40000                | NOEC<br>12500        | ErC <sub>50</sub><br>13500  | ErC <sub>50</sub><br>10330    | <b>Endpoint (µg/kg)</b> | NOEC<br>154000             |
| AF              |  | 100                        | 10                       | 100                                      | 10                   | 10                          | 10                            | AF                      | 10                         |
| RAC (µg/L)      |  | 320                        | 100                      | 400                                      | 1250                 | 1350                        | 1033                          | <b>RAC (µg/kg)</b>      | 15400                      |

**Aquatic organisms: acceptability of risk (PEC/RAC < 1) for Glyphosate for each organism group based on FOCUS Steps 1, 2 and 3 calculations for the use of MON 52276 in grass/alfalfa, (1 × 1800 g a.s./ha). Uses 8 and 9.**

| Group          |                              | Fish acute                 | Fish prolonged           | Inverteb. acute                          | Inverteb. prolonged  | Algae                       | Aquatic macrophytes           |                                | Sed. dwell. prolonged      |
|----------------|------------------------------|----------------------------|--------------------------|------------------------------------------|----------------------|-----------------------------|-------------------------------|--------------------------------|----------------------------|
| Test species   |                              | <i>Lepomis macrochirus</i> | <i>Brachydanio rerio</i> | <i>Crassostrea gigas / Daphnia magna</i> | <i>Daphnia magna</i> | <i>Skeletonema costatum</i> | <i>Myriophyllum aquaticum</i> |                                | <i>Chironomus riparius</i> |
| FOCUS Scenario | PEC <sub>sw,max</sub> (µg/L) |                            |                          |                                          |                      |                             |                               | PEC <sub>sed,max</sub> (µg/kg) |                            |
| <b>Step 1</b>  |                              |                            |                          |                                          |                      |                             |                               |                                |                            |
|                | 104.824                      | 0.328                      | <b>1.048</b>             | 0.262                                    | 0.084                | 0.078                       | 0.101                         | 3920                           | 0.255                      |
| <b>Step 2</b>  |                              |                            |                          |                                          |                      |                             |                               |                                |                            |
| N-Europe       | 46.803                       | 0.146                      | 0.468                    | 0.117                                    | 0.037                | 0.035                       | 0.045                         | 1980                           | 0.129                      |
| S-Europe       | 38.127                       | 0.119                      | 0.381                    | 0.095                                    | 0.031                | 0.028                       | 0.037                         | 1610                           | 0.105                      |
| <b>Step 3</b>  |                              |                            |                          |                                          |                      |                             |                               |                                |                            |
| D1/ditch       | 11.380                       | 0.036                      | 0.114                    | 0.028                                    | 0.009                | 0.008                       | 0.011                         | 64.820                         | 0.004                      |
| D1/stream      | 9.951                        | 0.031                      | 0.100                    | 0.025                                    | 0.008                | 0.007                       | 0.010                         | 6.614                          | 0.000                      |
| D2/ditch       | 11.400                       | 0.036                      | 0.114                    | 0.029                                    | 0.009                | 0.008                       | 0.011                         | 62.270                         | 0.004                      |
| D2/stream      | 10.130                       | 0.032                      | 0.101                    | 0.025                                    | 0.008                | 0.008                       | 0.010                         | 48.490                         | 0.003                      |
| D3/ditch       | 11.290                       | 0.035                      | 0.113                    | 0.028                                    | 0.009                | 0.008                       | 0.011                         | 12.590                         | 0.001                      |
| D4/pond        | 0.378                        | 0.001                      | 0.004                    | 0.001                                    | 0.000                | 0.000                       | 0.000                         | 6.426                          | 0.000                      |
| D4/stream      | 9.723                        | 0.030                      | 0.097                    | 0.024                                    | 0.008                | 0.007                       | 0.009                         | 2.158                          | 0.000                      |
| D5/pond        | 0.378                        | 0.001                      | 0.004                    | 0.001                                    | 0.000                | 0.000                       | 0.000                         | 6.386                          | 0.000                      |
| D5/stream      | 10.490                       | 0.033                      | 0.105                    | 0.026                                    | 0.008                | 0.008                       | 0.010                         | 3.064                          | 0.000                      |
| R2/stream      | 9.925                        | 0.031                      | 0.099                    | 0.025                                    | 0.008                | 0.007                       | 0.010                         | 12.970                         | 0.001                      |
| R3/stream      | 10.470                       | 0.033                      | 0.105                    | 0.026                                    | 0.008                | 0.008                       | 0.010                         | 16.560                         | 0.001                      |

**Aquatic organisms: acceptability of risk (PEC/RAC < 1) for Glyphosate for each organism group based on FOCUS Steps 1, 2 and 3 calculations for the use of MON 52276 in grass/alfalfa, (1 × 1800 g a.s./ha). Uses 8 and 9.**

| Group        |  | Fish acute                 | Fish prolonged           | Inverteb. acute                          | Inverteb. prolonged  | Algae                       | Aquatic macrophytes           |  | Sed. dwell. prolonged      |
|--------------|--|----------------------------|--------------------------|------------------------------------------|----------------------|-----------------------------|-------------------------------|--|----------------------------|
| Test species |  | <i>Lepomis macrochirus</i> | <i>Brachydanio rerio</i> | <i>Crassostrea gigas / Daphnia magna</i> | <i>Daphnia magna</i> | <i>Skeletonema costatum</i> | <i>Myriophyllum aquaticum</i> |  | <i>Chironomus riparius</i> |

AF: Assessment factor; PEC: Predicted environmental concentration; RAC: Regulatory acceptable concentration; PEC/RAC ratios above the relevant trigger of 1 are shown in **bold**

**Aquatic organisms: acceptability of risk (PEC/RAC < 1) for AMPA for each organism group based on FOCUS Steps 1, 2 and 3 calculations for the use of MON 52276 in grass/alfalfa, (1 × 1800 g a.s./ha). Uses 8 and 9.**

| Group                                            |                              | Fish acute                 | Fish prolonged             | Inverteb. acute            | Inverteb. prolonged  | Algae                                   | Aquatic macrophytes                     |                                | Sed. dwell. prolonged      |
|--------------------------------------------------|------------------------------|----------------------------|----------------------------|----------------------------|----------------------|-----------------------------------------|-----------------------------------------|--------------------------------|----------------------------|
| Test species                                     |                              | <i>Oncorhynchus mykiss</i> | <i>Pimephales promelas</i> | <i>Daphnia magna</i>       | <i>Daphnia magna</i> | <i>Pseudokirchneriella subcapitata</i>  | <i>Myriophyllum aquaticum</i>           |                                | <i>Chironomus riparius</i> |
| Endpoint (µg/L)                                  |                              | LC <sub>50</sub><br>100000 | NOEC<br>12000              | EC <sub>50</sub><br>690000 | NOEC<br>15000        | E <sub>r</sub> C <sub>50</sub><br>31900 | E <sub>r</sub> C <sub>50</sub><br>72000 | Endpoint (µg/kg)               | NOEC<br>786500             |
| AF                                               |                              | 100                        | 10                         | 100                        | 10                   | 10                                      | 10                                      | AF                             | 10                         |
| RAC (µg/L)                                       |                              | 1000                       | 1200                       | 6900                       | 1500                 | 3190                                    | 7200                                    | RAC (µg/kg)                    | 78650                      |
| FOCUS Scenario                                   | PEC <sub>sw,max</sub> (µg/L) |                            |                            |                            |                      |                                         |                                         | PEC <sub>sed,max</sub> (µg/kg) |                            |
| <b>Step 1 (DT<sub>50</sub> wat/sed = 89.9 d)</b> |                              |                            |                            |                            |                      |                                         |                                         |                                |                            |
|                                                  | 83.745                       | 0.084                      | 0.070                      | 0.012                      | 0.056                | 0.026                                   | 0.012                                   | 2050                           | 0.026                      |
| <b>Step 2 (DT<sub>50</sub> wat/sed = 89.9 d)</b> |                              |                            |                            |                            |                      |                                         |                                         |                                |                            |
| N-Europe                                         | 41.005                       | 0.041                      | 0.034                      | 0.006                      | 0.027                | 0.013                                   | 0.006                                   | 1030                           | 0.013                      |
| S-Europe                                         | 32.980                       | 0.033                      | 0.027                      | 0.005                      | 0.022                | 0.010                                   | 0.005                                   | 830.340                        | 0.011                      |

**Aquatic organisms: acceptability of risk (PEC/RAC < 1) for AMPA for each organism group based on FOCUS Steps 1, 2 and 3 calculations for the use of MON 52276 in grass/alfalfa, (1 × 1800 g a.s./ha). Uses 8 and 9.**

| Group        |  | Fish acute                 | Fish prolonged             | Inverteb. acute      | Inverteb. prolonged  | Algae                                  | Aquatic macrophytes           |  | Sed. dwell. prolonged      |
|--------------|--|----------------------------|----------------------------|----------------------|----------------------|----------------------------------------|-------------------------------|--|----------------------------|
| Test species |  | <i>Oncorhynchus mykiss</i> | <i>Pimephales promelas</i> | <i>Daphnia magna</i> | <i>Daphnia magna</i> | <i>Pseudokirchneriella subcapitata</i> | <i>Myriophyllum aquaticum</i> |  | <i>Chironomus riparius</i> |

AF: Assessment factor; PEC: Predicted environmental concentration; RAC: Regulatory acceptable concentration; PEC/RAC ratios above the relevant trigger of 1 are shown in **bold**

**Aquatic organisms: acceptability of risk (PEC/RAC < 1) for HMPA for each organism group based on FOCUS Steps 1, 2 and 3 calculations for the use of MON 52276 in grass/alfalfa, (1 × 1800 g a.s./ha). Uses 8 and 9**

| Group           |                              | Fish acute                | Inverteb. acute            | Algae                                    | Aquatic macrophytes                      |                                | Sed. dwell. prolonged                    |
|-----------------|------------------------------|---------------------------|----------------------------|------------------------------------------|------------------------------------------|--------------------------------|------------------------------------------|
| Test species    |                              | -                         | <i>Daphnia magna</i>       | <i>Pseudokirchneriella subcapitata</i>   | <i>Lemna gibba</i>                       |                                | <i>Chironomus riparius</i> <sup>\$</sup> |
| Endpoint (µg/L) |                              | LC <sub>50</sub><br>32000 | EC <sub>50</sub><br>100000 | E <sub>r</sub> C <sub>50</sub><br>120000 | E <sub>r</sub> C <sub>50</sub><br>123000 | Endpoint (µg/kg)               | NOEC<br>15400 µg/kg sed.                 |
| AF              |                              | 100                       | 100                        | 10                                       | 10                                       | AF                             | 10                                       |
| RAC (µg/L)      |                              | 320                       | 1000                       | 12000                                    | 12300                                    | RAC (µg/kg)                    | 1540 µg/kg sed.                          |
| FOCUS Scenario  | PEC <sub>sw,max</sub> (µg/L) |                           |                            |                                          |                                          | PEC <sub>sed,max</sub> (µg/kg) |                                          |
| <b>Step 1</b>   |                              |                           |                            |                                          |                                          |                                |                                          |
|                 | 40.321                       | 0.126                     | 0.040                      | 0.003                                    | 0.003                                    | 284.76                         | 0.185                                    |
| <b>Step 2</b>   |                              |                           |                            |                                          |                                          |                                |                                          |
| N-Europe        | 20.361                       | 0.064                     | 0.020                      | 0.002                                    | 0.002                                    | 143.82                         | 0.093                                    |
| S-Europe        | 16.506                       | 0.052                     | 0.017                      | 0.001                                    | 0.001                                    | 116.58                         | 0.076                                    |



**Aquatic organisms: acceptability of risk (PEC/RAC < 1) for HMPA for each organism group based on FOCUS Steps 1, 2 and 3 calculations for the use of MON 52276 in grass/alfalfa, (1 × 1800 g a.s./ha). Uses 8 and 9**

| Group        |  | Fish acute | Inverteb. acute      | Algae                                  | Aquatic macrophytes |  | Sed. dwell. prolonged                    |
|--------------|--|------------|----------------------|----------------------------------------|---------------------|--|------------------------------------------|
| Test species |  | -          | <i>Daphnia magna</i> | <i>Pseudokirchneriella subcapitata</i> | <i>Lemna gibba</i>  |  | <i>Chironomus riparius</i> <sup>\$</sup> |

AF: Assessment factor; PEC: Predicted environmental concentration; RAC: Regulatory acceptable concentration; PEC/RAC ratios above the relevant trigger of 1 are shown in **bold**

<sup>\$</sup> added following open point of section 4 (expert consultation 4.2): “RMS to update the PEC sediment calculations for HMPA using a default Koc value of 10000 mL/g and to include the metabolite HMPA in the residue definition for sediment in both an update to the RAR and the list of endpoints.” As worst case the metabolite was considered 10 times more toxic than glyphosate.

**Aquatic organisms: acceptability of risk (PEC/RAC < 1) for P1a and M3.3 for sediment dwellers based on FOCUS Steps 1, 2 and 3 calculations for the use of MON 52276 in grass/alfalfa, (1 × 1800 g a.s./ha). Uses 8 and 9**

| Group           |                                | Sed. dwell. prolonged      |
|-----------------|--------------------------------|----------------------------|
| Test species    |                                | <i>Chironomus riparius</i> |
| Endpoint (µg/L) | Endpoint (µg/kg)               | NOEC*                      |
| AF              | AF                             | 78650                      |
| RAC (µg/L)      | RAC (µg/kg)                    | 10                         |
| FOCUS Scenario  | PEC <sub>sed,max</sub> (µg/kg) | 7865                       |
| <b>Step 1</b>   |                                |                            |
|                 | 457.564                        | 0.058                      |
| <b>Step 2</b>   |                                |                            |
| N-Europe        | 231.089                        | 0.029                      |

**Aquatic organisms: acceptability of risk (PEC/RAC < 1) for P1a and M3.3 for sediment dwellers based on FOCUS Steps 1, 2 and 3 calculations for the use of MON 52276 in grass/alfalfa, (1 × 1800 g a.s./ha). Uses 8 and 9**

| <b>Group</b>        |         | <b>Sed. dwell. prolonged</b> |
|---------------------|---------|------------------------------|
| <b>Test species</b> |         | <i>Chironomus riparius</i>   |
| S-Europe            | 187.322 | 0.024                        |

AF: Assessment factor; PEC: Predicted environmental concentration; RAC: Regulatory acceptable concentration; PEC/RAC ratios above the relevant trigger of 1 are shown in **bold**

\* considered ten times more toxic than AMPA

**Aquatic organisms: acceptability of risk (PEC/RAC < 1) for Glyphosate for each organism group based on FOCUS Steps 1, 2 and 3 calculations for the use of MON 52276 in vegetables, root (1 × 720 g a.s./ha). Covers uses 1 a-c, 2 a-c, 6 a-b, 10 a-c.**

| Group                    |                              | Fish acute                 | Fish prolonged           | Inverteb. acute                          | Inverteb. prolonged  | Algae                       | Aquatic macrophytes           |                                | Sed. dwell. prolonged      |
|--------------------------|------------------------------|----------------------------|--------------------------|------------------------------------------|----------------------|-----------------------------|-------------------------------|--------------------------------|----------------------------|
| Test species             |                              | <i>Lepomis macrochirus</i> | <i>Brachydanio rerio</i> | <i>Crassostrea gigas / Daphnia magna</i> | <i>Daphnia magna</i> | <i>Skeletonema costatum</i> | <i>Myriophyllum aquaticum</i> |                                | <i>Chironomus riparius</i> |
| Endpoint (µg/L)          |                              | LC <sub>50</sub><br>32000  | NOEC<br>1000             | EC <sub>50</sub><br>40000                | NOEC<br>12500        | ErC <sub>50</sub><br>13500  | ErC <sub>50</sub><br>10330    | Endpoint (µg/kg)               | NOEC<br>154000             |
| AF                       |                              | 100                        | 10                       | 100                                      | 10                   | 10                          | 10                            | AF                             | 10                         |
| RAC (µg/L)               |                              | 320                        | 100                      | 400                                      | 1250                 | 1350                        | 1033                          | RAC (µg/kg)                    | 15400                      |
| FOCUS Scenario           | PEC <sub>sw,max</sub> (µg/L) |                            |                          |                                          |                      |                             |                               | PEC <sub>sed,max</sub> (µg/kg) |                            |
| <b>Step 1</b>            |                              |                            |                          |                                          |                      |                             |                               |                                |                            |
|                          | 41.930                       | 0.131                      | 0.419                    | 0.105                                    | 0.034                | 0.031                       | 0.041                         | 1570                           | 0.102                      |
| <b>Step 2</b>            |                              |                            |                          |                                          |                      |                             |                               |                                |                            |
| N-Europe                 | 18.721                       | 0.059                      | 0.187                    | 0.047                                    | 0.015                | 0.014                       | 0.018                         | 792.933                        | 0.051                      |
| S-Europe                 | 15.251                       | 0.048                      | 0.153                    | 0.038                                    | 0.012                | 0.011                       | 0.015                         | 642.035                        | 0.042                      |
| <b>Step 3</b>            |                              |                            |                          |                                          |                      |                             |                               |                                |                            |
| D3/ditch                 | 4.487                        | 0.014                      | 0.045                    | 0.011                                    | 0.004                | 0.003                       | 0.004                         | 4.157                          | 0.000                      |
| D6/ditch                 | 4.498                        | 0.014                      | 0.045                    | 0.011                                    | 0.004                | 0.003                       | 0.004                         | 7.012                          | 0.000                      |
| R1/pond                  | 0.403                        | 0.001                      | 0.004                    | 0.001                                    | 0.000                | 0.000                       | 0.000                         | 19.760                         | 0.001                      |
| R1/stream                | 2.955                        | 0.009                      | 0.030                    | 0.007                                    | 0.002                | 0.002                       | 0.003                         | 156.200                        | 0.010                      |
| R2/stream                | 3.969                        | 0.012                      | 0.040                    | 0.010                                    | 0.003                | 0.003                       | 0.004                         | 692.400                        | 0.045                      |
| R2/stream <sub>2nd</sub> | 3.969                        | 0.012                      | 0.040                    | 0.010                                    | 0.003                | 0.003                       | 0.004                         | 757.800                        | 0.049                      |

**Aquatic organisms: acceptability of risk (PEC/RAC < 1) for Glyphosate for each organism group based on FOCUS Steps 1, 2 and 3 calculations for the use of MON 52276 in vegetables, root (1 × 720 g a.s./ha). Covers uses 1 a-c, 2 a-c, 6 a-b, 10 a-c.**

| Group        |       | Fish acute                 | Fish prolonged           | Inverteb. acute                          | Inverteb. prolonged  | Algae                       | Aquatic macrophytes           |         | Sed. dwell. prolonged      |
|--------------|-------|----------------------------|--------------------------|------------------------------------------|----------------------|-----------------------------|-------------------------------|---------|----------------------------|
| Test species |       | <i>Lepomis macrochirus</i> | <i>Brachydanio rerio</i> | <i>Crassostrea gigas / Daphnia magna</i> | <i>Daphnia magna</i> | <i>Skeletonema costatum</i> | <i>Myriophyllum aquaticum</i> |         | <i>Chironomus riparius</i> |
| R3/stream    | 4.175 | 0.013                      | 0.042                    | 0.010                                    | 0.003                | 0.003                       | 0.004                         | 117.900 | 0.008                      |
| R4/stream    | 2.918 | 0.009                      | 0.029                    | 0.007                                    | 0.002                | 0.002                       | 0.003                         | 238.200 | 0.015                      |

AF: Assessment factor; PEC: Predicted environmental concentration; RAC: Regulatory acceptable concentration; PEC/RAC ratios above the relevant trigger of 1 are shown in **bold**

**Aquatic organisms: acceptability of risk (PEC/RAC < 1) for Glyphosate for each organism group based on FOCUS Steps 1, 2 and 3 calculations for the use of MON 52276 in potatoes (1 × 720 g a.s./ha). Covers uses 1 a-c, 2 a-c, 6 a-b, 10 a-c.**

| Group           |                              | Fish acute                 | Fish prolonged           | Inverteb. acute                          | Inverteb. prolonged  | Algae                       | Aquatic macrophytes           |                                | Sed. dwell. prolonged      |
|-----------------|------------------------------|----------------------------|--------------------------|------------------------------------------|----------------------|-----------------------------|-------------------------------|--------------------------------|----------------------------|
| Test species    |                              | <i>Lepomis macrochirus</i> | <i>Brachydanio rerio</i> | <i>Crassostrea gigas / Daphnia magna</i> | <i>Daphnia magna</i> | <i>Skeletonema costatum</i> | <i>Myriophyllum aquaticum</i> |                                | <i>Chironomus riparius</i> |
| Endpoint (µg/L) |                              | LC <sub>50</sub><br>32000  | NOEC<br>1000             | EC <sub>50</sub><br>40000                | NOEC<br>12500        | ErC <sub>50</sub><br>13500  | ErC <sub>50</sub><br>10330    | Endpoint (µg/kg)               | NOEC<br>154000             |
| AF              |                              | 100                        | 10                       | 100                                      | 10                   | 10                          | 10                            | AF                             | 10                         |
| RAC (µg/L)      |                              | 320                        | 100                      | 400                                      | 1250                 | 1350                        | 1033                          | RAC (µg/kg)                    | 15400                      |
| FOCUS Scenario  | PEC <sub>sw,max</sub> (µg/L) |                            |                          |                                          |                      |                             |                               | PEC <sub>sed,max</sub> (µg/kg) |                            |
| <b>Step 1</b>   |                              |                            |                          |                                          |                      |                             |                               |                                |                            |
|                 | 41.930                       | 0.131                      | 0.419                    | 0.105                                    | 0.034                | 0.031                       | 0.041                         | 1570                           | 0.102                      |

**Aquatic organisms: acceptability of risk (PEC/RAC < 1) for Glyphosate for each organism group based on FOCUS Steps 1, 2 and 3 calculations for the use of MON 52276 in potatoes (1 × 720 g a.s./ha). Covers uses 1 a-c, 2 a-c, 6 a-b, 10 a-c.**

| Group                    |        | Fish acute                 | Fish prolonged           | Inverteb. acute                                 | Inverteb. prolonged  | Algae                       | Aquatic macrophytes           |         | Sed. dwell. prolonged      |
|--------------------------|--------|----------------------------|--------------------------|-------------------------------------------------|----------------------|-----------------------------|-------------------------------|---------|----------------------------|
| Test species             |        | <i>Lepomis macrochirus</i> | <i>Brachydanio rerio</i> | <i>Crassostrea gigas</i> / <i>Daphnia magna</i> | <i>Daphnia magna</i> | <i>Skeletonema costatum</i> | <i>Myriophyllum aquaticum</i> |         | <i>Chironomus riparius</i> |
| <b>Step 2</b>            |        |                            |                          |                                                 |                      |                             |                               |         |                            |
| N-Europe                 | 18.721 | 0.059                      | 0.187                    | 0.047                                           | 0.015                | 0.014                       | 0.018                         | 792.933 | 0.051                      |
| S-Europe                 | 15.251 | 0.048                      | 0.153                    | 0.038                                           | 0.012                | 0.011                       | 0.015                         | 642.035 | 0.042                      |
| <b>Step 3</b>            |        |                            |                          |                                                 |                      |                             |                               |         |                            |
| D3/ditch                 | 3.696  | 0.012                      | 0.037                    | 0.009                                           | 0.003                | 0.003                       | 0.004                         | 2.559   | 0.000                      |
| D4/pond                  | 0.144  | 0.000                      | 0.001                    | 0.000                                           | 0.000                | 0.000                       | 0.000                         | 2.516   | 0.000                      |
| D4/stream                | 3.144  | 0.010                      | 0.031                    | 0.008                                           | 0.003                | 0.002                       | 0.003                         | 0.208   | 0.000                      |
| D6/ditch                 | 3.722  | 0.012                      | 0.037                    | 0.009                                           | 0.003                | 0.003                       | 0.004                         | 7.772   | 0.001                      |
| D6/ditch 2 <sup>nd</sup> | 3.733  | 0.012                      | 0.037                    | 0.009                                           | 0.003                | 0.003                       | 0.004                         | 13.850  | 0.001                      |
| R1/pond                  | 0.470  | 0.001                      | 0.005                    | 0.001                                           | 0.000                | 0.000                       | 0.000                         | 23.210  | 0.002                      |
| R1/stream                | 2.562  | 0.008                      | 0.026                    | 0.006                                           | 0.002                | 0.002                       | 0.002                         | 181.700 | 0.012                      |
| R2/stream                | 3.441  | 0.011                      | 0.034                    | 0.009                                           | 0.003                | 0.003                       | 0.003                         | 812.300 | 0.053                      |
| R3/stream                | 3.619  | 0.011                      | 0.036                    | 0.009                                           | 0.003                | 0.003                       | 0.004                         | 366.100 | 0.024                      |

AF: Assessment factor; PEC: Predicted environmental concentration; RAC: Regulatory acceptable concentration; PEC/RAC ratios above the relevant trigger of 1 are shown in **bold**

**Aquatic organisms: acceptability of risk (PEC/RAC < 1) for Glyphosate for each organism group based on FOCUS Steps 1, 2 and 3 calculations for the use of MON 52276 in vegetables, bulb (1 × 720 g a.s./ha). Covers uses 1 a-c, 2 a-c, 6 a-b, 10 a-c.**

| Group                       |                              | Fish acute                 | Fish prolonged           | Inverteb. acute                                 | Inverteb. prolonged  | Algae                       | Aquatic macrophytes           |                                | Sed. dwell. prolonged      |
|-----------------------------|------------------------------|----------------------------|--------------------------|-------------------------------------------------|----------------------|-----------------------------|-------------------------------|--------------------------------|----------------------------|
| Test species                |                              | <i>Lepomis macrochirus</i> | <i>Brachydanio rerio</i> | <i>Crassostrea gigas</i> / <i>Daphnia magna</i> | <i>Daphnia magna</i> | <i>Skeletonema costatum</i> | <i>Myriophyllum aquaticum</i> |                                | <i>Chironomus riparius</i> |
| Endpoint (µg/L)             |                              | LC <sub>50</sub><br>32000  | NOEC<br>1000             | EC <sub>50</sub><br>40000                       | NOEC<br>12500        | ErC <sub>50</sub><br>13500  | ErC <sub>50</sub><br>10330    | Endpoint (µg/kg)               | NOEC<br>154000             |
| AF                          |                              | 100                        | 10                       | 100                                             | 10                   | 10                          | 10                            | AF                             | 10                         |
| RAC (µg/L)                  |                              | 320                        | 100                      | 400                                             | 1250                 | 1350                        | 1033                          | RAC (µg/kg)                    | 15400                      |
| FOCUS Scenario              | PEC <sub>sw,max</sub> (µg/L) |                            |                          |                                                 |                      |                             |                               | PEC <sub>sed,max</sub> (µg/kg) |                            |
| <b>Step 1</b>               |                              |                            |                          |                                                 |                      |                             |                               |                                |                            |
|                             | 41.930                       | 0.131                      | 0.419                    | 0.105                                           | 0.034                | 0.031                       | 0.041                         | 1570                           | 0.102                      |
| <b>Step 2</b>               |                              |                            |                          |                                                 |                      |                             |                               |                                |                            |
| N-Europe                    | 18.721                       | 0.059                      | 0.187                    | 0.047                                           | 0.015                | 0.014                       | 0.018                         | 792.933                        | 0.051                      |
| S-Europe                    | 15.251                       | 0.048                      | 0.153                    | 0.038                                           | 0.012                | 0.011                       | 0.015                         | 642.035                        | 0.042                      |
| <b>Step 3</b>               |                              |                            |                          |                                                 |                      |                             |                               |                                |                            |
| D3/ditch                    | 4.470                        | 0.014                      | 0.045                    | 0.011                                           | 0.004                | 0.003                       | 0.004                         | 2.922                          | 0.000                      |
| D4/pond                     | 0.149                        | 0.000                      | 0.001                    | 0.000                                           | 0.000                | 0.000                       | 0.000                         | 2.582                          | 0.000                      |
| D4/stream                   | 3.534                        | 0.011                      | 0.035                    | 0.009                                           | 0.003                | 0.003                       | 0.003                         | 0.191                          | 0.000                      |
| D6/ditch                    | 4.518                        | 0.014                      | 0.045                    | 0.011                                           | 0.004                | 0.003                       | 0.004                         | 15.930                         | 0.001                      |
| D6/ditch<br>2 <sup>nd</sup> | 4.518                        | 0.014                      | 0.045                    | 0.011                                           | 0.004                | 0.003                       | 0.004                         | 16.130                         | 0.001                      |
| R1/pond                     | 0.451                        | 0.001                      | 0.005                    | 0.001                                           | 0.000                | 0.000                       | 0.000                         | 22.050                         | 0.001                      |

**Aquatic organisms: acceptability of risk (PEC/RAC < 1) for Glyphosate for each organism group based on FOCUS Steps 1, 2 and 3 calculations for the use of MON 52276 in vegetables, bulb (1 × 720 g a.s./ha). Covers uses 1 a-c, 2 a-c, 6 a-b, 10 a-c.**

| Group        |       | Fish acute                 | Fish prolonged           | Inverteb. acute                          | Inverteb. prolonged  | Algae                       | Aquatic macrophytes           |         | Sed. dwell. prolonged      |
|--------------|-------|----------------------------|--------------------------|------------------------------------------|----------------------|-----------------------------|-------------------------------|---------|----------------------------|
| Test species |       | <i>Lepomis macrochirus</i> | <i>Brachydanio rerio</i> | <i>Crassostrea gigas / Daphnia magna</i> | <i>Daphnia magna</i> | <i>Skeletonema costatum</i> | <i>Myriophyllum aquaticum</i> |         | <i>Chironomus riparius</i> |
| R1/stream    | 2.955 | 0.009                      | 0.030                    | 0.007                                    | 0.002                | 0.002                       | 0.003                         | 180.700 | 0.012                      |
| R2/stream    | 3.969 | 0.012                      | 0.040                    | 0.010                                    | 0.003                | 0.003                       | 0.004                         | 695.300 | 0.045                      |
| R3/stream    | 4.174 | 0.013                      | 0.042                    | 0.010                                    | 0.003                | 0.003                       | 0.004                         | 156.500 | 0.010                      |
| R4/stream    | 2.955 | 0.009                      | 0.030                    | 0.007                                    | 0.002                | 0.002                       | 0.003                         | 162.900 | 0.011                      |

AF: Assessment factor; PEC: Predicted environmental concentration; RAC: Regulatory acceptable concentration; PEC/RAC ratios above the relevant trigger of 1 are shown in **bold**

**Aquatic organisms: acceptability of risk (PEC/RAC < 1) for Glyphosate for each organism group based on FOCUS Steps 1, 2 and 3 calculations for the use of MON 52276 in vegetables, fruiting (1 × 720 g a.s./ha). Covers uses 1 a-c, 2 a-c, 6 a-b, 10 a-c.**

| Group           |                              | Fish acute                 | Fish prolonged           | Inverteb. acute                          | Inverteb. prolonged  | Algae                       | Aquatic macrophytes           |                                      | Sed. dwell. prolonged      |
|-----------------|------------------------------|----------------------------|--------------------------|------------------------------------------|----------------------|-----------------------------|-------------------------------|--------------------------------------|----------------------------|
| Test species    |                              | <i>Lepomis macrochirus</i> | <i>Brachydanio rerio</i> | <i>Crassostrea gigas / Daphnia magna</i> | <i>Daphnia magna</i> | <i>Skeletonema costatum</i> | <i>Myriophyllum aquaticum</i> |                                      | <i>Chironomus riparius</i> |
| Endpoint (µg/L) |                              | LC <sub>50</sub><br>32000  | NOEC<br>1000             | EC <sub>50</sub><br>40000                | NOEC<br>12500        | ErC <sub>50</sub><br>13500  | ErC <sub>50</sub><br>10330    | <b>Endpoint (µg/kg)</b>              | NOEC<br>154000             |
| AF              |                              | 100                        | 10                       | 100                                      | 10                   | 10                          | 10                            | <b>AF</b>                            | 10                         |
| RAC (µg/L)      |                              | 320                        | 100                      | 400                                      | 1250                 | 1350                        | 1033                          | <b>RAC (µg/kg)</b>                   | 15400                      |
| FOCUS Scenario  | PEC <sub>sw,max</sub> (µg/L) |                            |                          |                                          |                      |                             |                               | <b>PEC<sub>sed,max</sub> (µg/kg)</b> |                            |

**Aquatic organisms: acceptability of risk (PEC/RAC < 1) for Glyphosate for each organism group based on FOCUS Steps 1, 2 and 3 calculations for the use of MON 52276 in vegetables, fruiting (1 × 720 g a.s./ha). Covers uses 1 a-c, 2 a-c, 6 a-b, 10 a-c.**

| Group         |        | Fish acute                 | Fish prolonged           | Inverteb. acute                          | Inverteb. prolonged  | Algae                       | Aquatic macrophytes           |         | Sed. dwell. prolonged      |
|---------------|--------|----------------------------|--------------------------|------------------------------------------|----------------------|-----------------------------|-------------------------------|---------|----------------------------|
| Test species  |        | <i>Lepomis macrochirus</i> | <i>Brachydanio rerio</i> | <i>Crassostrea gigas / Daphnia magna</i> | <i>Daphnia magna</i> | <i>Skeletonema costatum</i> | <i>Myriophyllum aquaticum</i> |         | <i>Chironomus riparius</i> |
| <b>Step 1</b> |        |                            |                          |                                          |                      |                             |                               |         |                            |
|               | 41.930 | 0.131                      | 0.419                    | 0.105                                    | 0.034                | 0.031                       | 0.041                         | 1570    | 0.102                      |
| <b>Step 2</b> |        |                            |                          |                                          |                      |                             |                               |         |                            |
| N-Europe      | 18.721 | 0.059                      | 0.187                    | 0.047                                    | 0.015                | 0.014                       | 0.018                         | 792.933 | 0.051                      |
| S-Europe      | 15.251 | 0.048                      | 0.153                    | 0.038                                    | 0.012                | 0.011                       | 0.015                         | 642.035 | 0.042                      |
| <b>Step 3</b> |        |                            |                          |                                          |                      |                             |                               |         |                            |
| D6/ditch      | 4.509  | 0.014                      | 0.045                    | 0.011                                    | 0.004                | 0.003                       | 0.004                         | 12.030  | 0.001                      |
| R2/stream     | 3.969  | 0.012                      | 0.040                    | 0.010                                    | 0.003                | 0.003                       | 0.004                         | 922.200 | 0.060                      |
| R3/stream     | 4.175  | 0.013                      | 0.042                    | 0.010                                    | 0.003                | 0.003                       | 0.004                         | 366.100 | 0.024                      |
| R4/stream     | 2.955  | 0.009                      | 0.030                    | 0.007                                    | 0.002                | 0.002                       | 0.003                         | 224     | 0.015                      |

AF: Assessment factor; PEC: Predicted environmental concentration; RAC: Regulatory acceptable concentration; PEC/RAC ratios above the relevant trigger of 1 are shown in **bold**

**Aquatic organisms: acceptability of risk (PEC/RAC < 1) for Glyphosate for each organism group based on FOCUS Steps 1, 2 and 3 calculations for the use of MON 52276 in vegetables, leafy (1 × 720 g a.s./ha). Covers uses 1 a-c, 2 a-c, 6 a-b, 10 a-c.**

| Group        |  | Fish acute                 | Fish prolonged           | Inverteb. acute                          | Inverteb. prolonged  | Algae                       | Aquatic macrophytes           |                 | Sed. dwell. prolonged      |
|--------------|--|----------------------------|--------------------------|------------------------------------------|----------------------|-----------------------------|-------------------------------|-----------------|----------------------------|
| Test species |  | <i>Lepomis macrochirus</i> | <i>Brachydanio rerio</i> | <i>Crassostrea gigas / Daphnia magna</i> | <i>Daphnia magna</i> | <i>Skeletonema costatum</i> | <i>Myriophyllum aquaticum</i> |                 | <i>Chironomus riparius</i> |
| Endpoint     |  | LC <sub>50</sub>           | NOEC                     | EC <sub>50</sub>                         | NOEC                 | ErC <sub>50</sub>           | ErC <sub>50</sub>             | <b>Endpoint</b> | NOEC                       |



**Aquatic organisms: acceptability of risk (PEC/RAC < 1) for Glyphosate for each organism group based on FOCUS Steps 1, 2 and 3 calculations for the use of MON 52276 in vegetables, leafy (1 × 720 g a.s./ha). Covers uses 1 a-c, 2 a-c, 6 a-b, 10 a-c.**

| Group                    |                              | Fish acute                 | Fish prolonged           | Inverteb. acute                                 | Inverteb. prolonged  | Algae                       | Aquatic macrophytes           |                                | Sed. dwell. prolonged      |
|--------------------------|------------------------------|----------------------------|--------------------------|-------------------------------------------------|----------------------|-----------------------------|-------------------------------|--------------------------------|----------------------------|
| Test species             |                              | <i>Lepomis macrochirus</i> | <i>Brachydanio rerio</i> | <i>Crassostrea gigas</i> / <i>Daphnia magna</i> | <i>Daphnia magna</i> | <i>Skeletonema costatum</i> | <i>Myriophyllum aquaticum</i> |                                | <i>Chironomus riparius</i> |
| (µg/L)                   |                              | 32000                      | 1000                     | 40000                                           | 12500                | 13500                       | 10330                         | (µg/kg)                        | 154000                     |
| AF                       |                              | 100                        | 10                       | 100                                             | 10                   | 10                          | 10                            | AF                             | 10                         |
| RAC (µg/L)               |                              | 320                        | 100                      | 400                                             | 1250                 | 1350                        | 1033                          | RAC (µg/kg)                    | 15400                      |
| FOCUS Scenario           | PEC <sub>sw,max</sub> (µg/L) |                            |                          |                                                 |                      |                             |                               | PEC <sub>sed,max</sub> (µg/kg) |                            |
| <b>Step 1</b>            |                              |                            |                          |                                                 |                      |                             |                               |                                |                            |
|                          | 41.930                       | 0.131                      | 0.419                    | 0.105                                           | 0.034                | 0.031                       | 0.041                         | 1570                           | 0.102                      |
| <b>Step 2</b>            |                              |                            |                          |                                                 |                      |                             |                               |                                |                            |
| N-Europe                 | 18.721                       | 0.059                      | 0.187                    | 0.047                                           | 0.015                | 0.014                       | 0.018                         | 792.933                        | 0.051                      |
| S-Europe                 | 15.251                       | 0.048                      | 0.153                    | 0.038                                           | 0.012                | 0.011                       | 0.015                         | 642.035                        | 0.042                      |
| <b>Step 3</b>            |                              |                            |                          |                                                 |                      |                             |                               |                                |                            |
| D3/ditch                 | 4.486                        | 0.014                      | 0.045                    | 0.011                                           | 0.004                | 0.003                       | 0.004                         | 4.078                          | 0.000                      |
| D3/ditch 2 <sup>nd</sup> | 4.482                        | 0.014                      | 0.045                    | 0.011                                           | 0.004                | 0.003                       | 0.004                         | 3.723                          | 0.000                      |
| D4/pond                  | 0.149                        | 0.000                      | 0.001                    | 0.000                                           | 0.000                | 0.000                       | 0.000                         | 2.592                          | 0.000                      |
| D4/stream                | 3.605                        | 0.011                      | 0.036                    | 0.009                                           | 0.003                | 0.003                       | 0.003                         | 0.223                          | 0.000                      |
| D6/ditch                 | 4.518                        | 0.014                      | 0.045                    | 0.011                                           | 0.004                | 0.003                       | 0.004                         | 16.620                         | 0.001                      |
| R1/pond                  | 0.376                        | 0.001                      | 0.004                    | 0.001                                           | 0.000                | 0.000                       | 0.000                         | 22.340                         | 0.001                      |
| R1/pond 2 <sup>nd</sup>  | 0.582                        | 0.002                      | 0.006                    | 0.001                                           | 0.000                | 0.000                       | 0.001                         | 27.450                         | 0.002                      |

**Aquatic organisms: acceptability of risk (PEC/RAC < 1) for Glyphosate for each organism group based on FOCUS Steps 1, 2 and 3 calculations for the use of MON 52276 in vegetables, leafy (1 × 720 g a.s./ha). Covers uses 1 a-c, 2 a-c, 6 a-b, 10 a-c.**

| Group                     |       | Fish acute                 | Fish prolonged           | Inverteb. acute                          | Inverteb. prolonged  | Algae                       | Aquatic macrophytes           |         | Sed. dwell. prolonged      |
|---------------------------|-------|----------------------------|--------------------------|------------------------------------------|----------------------|-----------------------------|-------------------------------|---------|----------------------------|
| Test species              |       | <i>Lepomis macrochirus</i> | <i>Brachydanio rerio</i> | <i>Crassostrea gigas / Daphnia magna</i> | <i>Daphnia magna</i> | <i>Skeletonema costatum</i> | <i>Myriophyllum aquaticum</i> |         | <i>Chironomus riparius</i> |
| R1/stream                 | 2.954 | 0.009                      | 0.030                    | 0.007                                    | 0.002                | 0.002                       | 0.003                         | 221     | 0.014                      |
| R1/stream 2 <sup>nd</sup> | 2.952 | 0.009                      | 0.030                    | 0.007                                    | 0.002                | 0.002                       | 0.003                         | 434.800 | 0.028                      |
| R2/stream                 | 3.969 | 0.012                      | 0.040                    | 0.010                                    | 0.003                | 0.003                       | 0.004                         | 737.600 | 0.048                      |
| R2/stream 2 <sup>nd</sup> | 3.969 | 0.012                      | 0.040                    | 0.010                                    | 0.003                | 0.003                       | 0.004                         | 818.100 | 0.053                      |
| R3/stream                 | 4.175 | 0.013                      | 0.042                    | 0.010                                    | 0.003                | 0.003                       | 0.004                         | 534.200 | 0.035                      |
| R3/stream 2 <sup>nd</sup> | 4.175 | 0.013                      | 0.042                    | 0.010                                    | 0.003                | 0.003                       | 0.004                         | 366     | 0.024                      |
| R4/stream                 | 2.955 | 0.009                      | 0.030                    | 0.007                                    | 0.002                | 0.002                       | 0.003                         | 266.900 | 0.017                      |
| R4/stream 2 <sup>nd</sup> | 2.955 | 0.009                      | 0.030                    | 0.007                                    | 0.002                | 0.002                       | 0.003                         | 361.100 | 0.023                      |

AF: Assessment factor; PEC: Predicted environmental concentration; RAC: Regulatory acceptable concentration; PEC/RAC ratios above the relevant trigger of 1 are shown in **bold**

**Aquatic organisms: acceptability of risk (PEC/RAC < 1) for Glyphosate for each organism group based on FOCUS Steps 1, 2 and 3 calculations for the use of MON 52276 in sugar beets, (1 × 720 g a.s./ha). Covers uses 1 a-c, 2 a-c, 6 a-b, 10 a-c.**

| Group           |                              | Fish acute                 | Fish prolonged           | Inverteb. acute                          | Inverteb. prolonged  | Algae                       | Aquatic macrophytes           |                                | Sed. dwell. prolonged      |
|-----------------|------------------------------|----------------------------|--------------------------|------------------------------------------|----------------------|-----------------------------|-------------------------------|--------------------------------|----------------------------|
| Test species    |                              | <i>Lepomis macrochirus</i> | <i>Brachydanio rerio</i> | <i>Crassostrea gigas / Daphnia magna</i> | <i>Daphnia magna</i> | <i>Skeletonema costatum</i> | <i>Myriophyllum aquaticum</i> |                                | <i>Chironomus riparius</i> |
| Endpoint (µg/L) |                              | LC <sub>50</sub><br>32000  | NOEC<br>1000             | EC <sub>50</sub><br>40000                | NOEC<br>12500        | ErC <sub>50</sub><br>13500  | ErC <sub>50</sub><br>10330    | Endpoint (µg/kg)               | NOEC<br>154000             |
| AF              |                              | 100                        | 10                       | 100                                      | 10                   | 10                          | 10                            | AF                             | 10                         |
| RAC (µg/L)      |                              | 320                        | 100                      | 400                                      | 1250                 | 1350                        | 1033                          | RAC (µg/kg)                    | 15400                      |
| FOCUS Scenario  | PEC <sub>sw,max</sub> (µg/L) |                            |                          |                                          |                      |                             |                               | PEC <sub>sed,max</sub> (µg/kg) |                            |
| <b>Step 1</b>   |                              |                            |                          |                                          |                      |                             |                               |                                |                            |
|                 | 41.930                       | 0.131                      | 0.419                    | 0.105                                    | 0.034                | 0.031                       | 0.041                         | 1570                           | 0.102                      |
| <b>Step 2</b>   |                              |                            |                          |                                          |                      |                             |                               |                                |                            |
| N-Europe        | 18.721                       | 0.059                      | 0.187                    | 0.047                                    | 0.015                | 0.014                       | 0.018                         | 792.933                        | 0.051                      |
| S-Europe        | 15.251                       | 0.048                      | 0.153                    | 0.038                                    | 0.012                | 0.011                       | 0.015                         | 642.035                        | 0.042                      |
| <b>Step 3</b>   |                              |                            |                          |                                          |                      |                             |                               |                                |                            |
| D3/ditch        | 3.696                        | 0.012                      | 0.037                    | 0.009                                    | 0.003                | 0.003                       | 0.004                         | 2.539                          | 0.000                      |
| D4/pond         | 0.144                        | 0.000                      | 0.001                    | 0.000                                    | 0.000                | 0.000                       | 0.000                         | 2.467                          | 0.000                      |
| D4/stream       | 3.239                        | 0.010                      | 0.032                    | 0.008                                    | 0.003                | 0.002                       | 0.003                         | 0.314                          | 0.000                      |
| R1/pond         | 0.482                        | 0.002                      | 0.005                    | 0.001                                    | 0.000                | 0.000                       | 0.000                         | 22.080                         | 0.001                      |
| R1/stream       | 2.562                        | 0.008                      | 0.026                    | 0.006                                    | 0.002                | 0.002                       | 0.002                         | 206.800                        | 0.013                      |
| R3/stream       | 3.619                        | 0.011                      | 0.036                    | 0.009                                    | 0.003                | 0.003                       | 0.004                         | 366.100                        | 0.024                      |

**Aquatic organisms: acceptability of risk (PEC/RAC < 1) for Glyphosate for each organism group based on FOCUS Steps 1, 2 and 3 calculations for the use of MON 52276 in sugar beets, (1 × 720 g a.s./ha). Covers uses 1 a-c, 2 a-c, 6 a-b, 10 a-c.**

| Group        |  | Fish acute                 | Fish prolonged           | Inverteb. acute                          | Inverteb. prolonged  | Algae                       | Aquatic macrophytes           |  | Sed. dwell. prolonged      |
|--------------|--|----------------------------|--------------------------|------------------------------------------|----------------------|-----------------------------|-------------------------------|--|----------------------------|
| Test species |  | <i>Lepomis macrochirus</i> | <i>Brachydanio rerio</i> | <i>Crassostrea gigas / Daphnia magna</i> | <i>Daphnia magna</i> | <i>Skeletonema costatum</i> | <i>Myriophyllum aquaticum</i> |  | <i>Chironomus riparius</i> |

AF: Assessment factor; PEC: Predicted environmental concentration; RAC: Regulatory acceptable concentration; PEC/RAC ratios above the relevant trigger of 1 are shown in **bold**

**Aquatic organisms: acceptability of risk (PEC/RAC < 1) for Glyphosate for each organism group based on FOCUS Steps 1, 2 and 3 calculations for the use of MON 52276 in pome/stone fruit (1 × 720 g a.s./ha). Uses 4 a –c.**

| Group           |                              | Fish acute                 | Fish prolonged           | Inverteb. acute                          | Inverteb. prolonged  | Algae                       | Aquatic macrophytes                     |                                | Sed. dwell. prolonged      |
|-----------------|------------------------------|----------------------------|--------------------------|------------------------------------------|----------------------|-----------------------------|-----------------------------------------|--------------------------------|----------------------------|
| Test species    |                              | <i>Lepomis macrochirus</i> | <i>Brachydanio rerio</i> | <i>Crassostrea gigas / Daphnia magna</i> | <i>Daphnia magna</i> | <i>Skeletonema costatum</i> | <i>Myriophyllum aquaticum</i>           |                                | <i>Chironomus riparius</i> |
| Endpoint (µg/L) |                              | LC <sub>50</sub><br>32000  | NOEC<br>1000             | EC <sub>50</sub><br>40000                | NOEC<br>12500        | ErC <sub>50</sub><br>13500  | E <sub>r</sub> C <sub>50</sub><br>10330 | Endpoint (µg/kg)               | NOEC<br>154000             |
| AF              |                              | 100                        | 10                       | 100                                      | 10                   | 10                          | 10                                      | AF                             | 10                         |
| RAC (µg/L)      |                              | 320                        | 100                      | 400                                      | 1250                 | 1350                        | 1033                                    | RAC (µg/kg)                    | 15400                      |
| FOCUS Scenario  | PEC <sub>sw,max</sub> (µg/L) |                            |                          |                                          |                      |                             |                                         | PEC <sub>sed,max</sub> (µg/kg) |                            |
| <b>Step 1</b>   |                              |                            |                          |                                          |                      |                             |                                         |                                |                            |
|                 | 41.930                       | 0.131                      | 0.419                    | 0.105                                    | 0.034                | 0.031                       | 0.041                                   | 1570                           | 0.102                      |
| <b>Step 2</b>   |                              |                            |                          |                                          |                      |                             |                                         |                                |                            |
| N-Europe        | 18.721                       | 0.059                      | 0.187                    | 0.047                                    | 0.015                | 0.014                       | 0.018                                   | 792.933                        | 0.051                      |

**Aquatic organisms: acceptability of risk (PEC/RAC < 1) for Glyphosate for each organism group based on FOCUS Steps 1, 2 and 3 calculations for the use of MON 52276 in pome/stone fruit (1 × 720 g a.s./ha). Uses 4 a –c.**

| Group         |        | Fish acute                 | Fish prolonged           | Inverteb. acute                          | Inverteb. prolonged  | Algae                       | Aquatic macrophytes           |         | Sed. dwell. prolonged      |
|---------------|--------|----------------------------|--------------------------|------------------------------------------|----------------------|-----------------------------|-------------------------------|---------|----------------------------|
| Test species  |        | <i>Lepomis macrochirus</i> | <i>Brachydanio rerio</i> | <i>Crassostrea gigas / Daphnia magna</i> | <i>Daphnia magna</i> | <i>Skeletonema costatum</i> | <i>Myriophyllum aquaticum</i> |         | <i>Chironomus riparius</i> |
| S-Europe      | 15.251 | 0.048                      | 0.153                    | 0.038                                    | 0.012                | 0.011                       | 0.015                         | 642.035 | 0.042                      |
| <b>Step 3</b> |        |                            |                          |                                          |                      |                             |                               |         |                            |
| D3/ditch      | 1.894  | 0.006                      | 0.019                    | 0.005                                    | 0.002                | 0.001                       | 0.002                         | 2.541   | 0.000                      |
| D4/pond       | 0.119  | 0.000                      | 0.001                    | 0.000                                    | 0.000                | 0.000                       | 0.000                         | 2.129   | 0.000                      |
| D4/stream     | 1.674  | 0.005                      | 0.017                    | 0.004                                    | 0.001                | 0.001                       | 0.002                         | 0.203   | 0.000                      |
| D5/pond       | 0.119  | 0.000                      | 0.001                    | 0.000                                    | 0.000                | 0.000                       | 0.000                         | 2.134   | 0.000                      |
| D5/stream     | 1.849  | 0.006                      | 0.018                    | 0.005                                    | 0.001                | 0.001                       | 0.002                         | 0.540   | 0.000                      |
| R1/pond       | 0.123  | 0.000                      | 0.001                    | 0.000                                    | 0.000                | 0.000                       | 0.000                         | 2.811   | 0.000                      |
| R1/stream     | 1.307  | 0.004                      | 0.013                    | 0.003                                    | 0.001                | 0.001                       | 0.001                         | 3.388   | 0.000                      |
| R2/stream     | 1.757  | 0.005                      | 0.018                    | 0.004                                    | 0.001                | 0.001                       | 0.002                         | 31.900  | 0.002                      |
| R3/stream     | 1.848  | 0.006                      | 0.018                    | 0.005                                    | 0.001                | 0.001                       | 0.002                         | 34.250  | 0.002                      |
| R4/stream     | 1.307  | 0.004                      | 0.013                    | 0.003                                    | 0.001                | 0.001                       | 0.001                         | 16.080  | 0.001                      |

AF: Assessment factor; PEC: Predicted environmental concentration; RAC: Regulatory acceptable concentration; PEC/RAC ratios above the relevant trigger of 1 are shown in **bold**

**Aquatic organisms: acceptability of risk (PEC/RAC < 1) for Glyphosate for each organism group based on FOCUS Steps 1, 2 and 3 calculations for the use of MON 52276 in olives (1 × 720 g a.s./ha). Uses 4 a –c.**

| Group           |                              | Fish acute                 | Fish prolonged           | Inverteb. acute                          | Inverteb. prolonged  | Algae                       | Aquatic macrophytes           |                                | Sed. dwell. prolonged      |
|-----------------|------------------------------|----------------------------|--------------------------|------------------------------------------|----------------------|-----------------------------|-------------------------------|--------------------------------|----------------------------|
| Test species    |                              | <i>Lepomis macrochirus</i> | <i>Brachydanio rerio</i> | <i>Crassostrea gigas / Daphnia magna</i> | <i>Daphnia magna</i> | <i>Skeletonema costatum</i> | <i>Myriophyllum aquaticum</i> |                                | <i>Chironomus riparius</i> |
| Endpoint (µg/L) |                              | LC <sub>50</sub><br>32000  | NOEC<br>1000             | EC <sub>50</sub><br>40000                | NOEC<br>12500        | ErC <sub>50</sub><br>13500  | ErC <sub>50</sub><br>10330    | Endpoint (µg/kg)               | NOEC<br>154000             |
| AF              |                              | 100                        | 10                       | 100                                      | 10                   | 10                          | 10                            | AF                             | 10                         |
| RAC (µg/L)      |                              | 320                        | 100                      | 400                                      | 1250                 | 1350                        | 1033                          | RAC (µg/kg)                    | 15400                      |
| FOCUS Scenario  | PEC <sub>sw,max</sub> (µg/L) |                            |                          |                                          |                      |                             |                               | PEC <sub>sed,max</sub> (µg/kg) |                            |
| <b>Step 1</b>   |                              |                            |                          |                                          |                      |                             |                               |                                |                            |
|                 | 41.930                       | 0.131                      | 0.419                    | 0.105                                    | 0.034                | 0.031                       | 0.041                         | 1570                           | 0.102                      |
| <b>Step 2</b>   |                              |                            |                          |                                          |                      |                             |                               |                                |                            |
| N-Europe        | 18.721                       | 0.059                      | 0.187                    | 0.047                                    | 0.015                | 0.014                       | 0.018                         | 792.933                        | 0.051                      |
| S-Europe        | 15.251                       | 0.048                      | 0.153                    | 0.038                                    | 0.012                | 0.011                       | 0.015                         | 642.035                        | 0.042                      |
| <b>Step 3</b>   |                              |                            |                          |                                          |                      |                             |                               |                                |                            |
| D6/ditch        | 1.902                        | 0.006                      | 0.019                    | 0.005                                    | 0.002                | 0.001                       | 0.002                         | 7.036                          | 0.000                      |
| R4/stream       | 1.459                        | 0.005                      | 0.015                    | 0.004                                    | 0.001                | 0.001                       | 0.001                         | 18.980                         | 0.001                      |

AF: Assessment factor; PEC: Predicted environmental concentration; RAC: Regulatory acceptable concentration; PEC/RAC ratios above the relevant trigger of 1 are shown in **bold**

**Aquatic organisms: acceptability of risk (PEC/RAC < 1) for Glyphosate for each organism group based on FOCUS Steps 1, 2 and 3 calculations for the use of MON 52276 in vines (1 × 720 g a.s./ha). Uses 5 a-c.**

| Group           |                              | Fish acute                 | Fish prolonged           | Inverteb. acute                                 | Inverteb. prolonged  | Algae                       | Aquatic macrophytes           |                                | Sed. dwell. prolonged      |
|-----------------|------------------------------|----------------------------|--------------------------|-------------------------------------------------|----------------------|-----------------------------|-------------------------------|--------------------------------|----------------------------|
| Test species    |                              | <i>Lepomis macrochirus</i> | <i>Brachydanio rerio</i> | <i>Crassostrea gigas</i> / <i>Daphnia magna</i> | <i>Daphnia magna</i> | <i>Skeletonema costatum</i> | <i>Myriophyllum aquaticum</i> |                                | <i>Chironomus riparius</i> |
| Endpoint (µg/L) |                              | LC <sub>50</sub><br>32000  | NOEC<br>1000             | EC <sub>50</sub><br>40000                       | NOEC<br>12500        | ErC <sub>50</sub><br>13500  | ErC <sub>50</sub><br>10330    | Endpoint (µg/kg)               | NOEC<br>154000             |
| AF              |                              | 100                        | 10                       | 100                                             | 10                   | 10                          | 10                            | AF                             | 10                         |
| RAC (µg/L)      |                              | 320                        | 100                      | 400                                             | 1250                 | 1350                        | 1033                          | RAC (µg/kg)                    | 15400                      |
| FOCUS Scenario  | PEC <sub>sw,max</sub> (µg/L) |                            |                          |                                                 |                      |                             |                               | PEC <sub>sed,max</sub> (µg/kg) |                            |
| <b>Step 1</b>   |                              |                            |                          |                                                 |                      |                             |                               |                                |                            |
|                 | 41.930                       | 0.131                      | 0.419                    | 0.105                                           | 0.034                | 0.031                       | 0.041                         | 1570                           | 0.102                      |
| <b>Step 2</b>   |                              |                            |                          |                                                 |                      |                             |                               |                                |                            |
| N-Europe        | 18.721                       | 0.059                      | 0.187                    | 0.047                                           | 0.015                | 0.014                       | 0.018                         | 792.933                        | 0.051                      |
| S-Europe        | 15.251                       | 0.048                      | 0.153                    | 0.038                                           | 0.012                | 0.011                       | 0.015                         | 642.035                        | 0.042                      |
| <b>Step 3</b>   |                              |                            |                          |                                                 |                      |                             |                               |                                |                            |
| D6/ditch        | 1.902                        | 0.006                      | 0.019                    | 0.005                                           | 0.002                | 0.001                       | 0.002                         | 7.036                          | 0.000                      |
| R1/pond         | 0.123                        | 0.000                      | 0.001                    | 0.000                                           | 0.000                | 0.000                       | 0.000                         | 2.806                          | 0.000                      |
| R1/stream       | 1.307                        | 0.004                      | 0.013                    | 0.003                                           | 0.001                | 0.001                       | 0.001                         | 3.413                          | 0.000                      |
| R2/stream       | 1.757                        | 0.005                      | 0.018                    | 0.004                                           | 0.001                | 0.001                       | 0.002                         | 31.850                         | 0.002                      |
| R3/stream       | 1.848                        | 0.006                      | 0.018                    | 0.005                                           | 0.001                | 0.001                       | 0.002                         | 34.270                         | 0.002                      |
| R4/stream       | 1.398                        | 0.004                      | 0.014                    | 0.003                                           | 0.001                | 0.001                       | 0.001                         | 16.920                         | 0.001                      |

**Aquatic organisms: acceptability of risk (PEC/RAC < 1) for Glyphosate for each organism group based on FOCUS Steps 1, 2 and 3 calculations for the use of MON 52276 in vines (1 × 720 g a.s./ha). Uses 5 a-c.**

| Group        |  | Fish acute                 | Fish prolonged           | Inverteb. acute                          | Inverteb. prolonged  | Algae                       | Aquatic macrophytes           |  | Sed. dwell. prolonged      |
|--------------|--|----------------------------|--------------------------|------------------------------------------|----------------------|-----------------------------|-------------------------------|--|----------------------------|
| Test species |  | <i>Lepomis macrochirus</i> | <i>Brachydanio rerio</i> | <i>Crassostrea gigas / Daphnia magna</i> | <i>Daphnia magna</i> | <i>Skeletonema costatum</i> | <i>Myriophyllum aquaticum</i> |  | <i>Chironomus riparius</i> |

AF: Assessment factor; PEC: Predicted environmental concentration; RAC: Regulatory acceptable concentration; PEC/RAC ratios above the relevant trigger of 1 are shown in **bold**

**Aquatic organisms: acceptability of risk (PEC/RAC < 1) for AMPA for each organism group based on FOCUS Steps 1, 2 and 3 calculations for the use of MON 52276 in field crops<sup>1</sup> (1 × 720 g a.s./ha). Covers uses 1 a-c, 2 a-c, 6 a-b, 10 a-c.**

| Group                                            |                              | Fish acute                 | Fish prolonged             | Inverteb. acute            | Inverteb. prolonged  | Algae                                   | Aquatic macrophytes                     |                                | Sed. dwell. prolonged      |
|--------------------------------------------------|------------------------------|----------------------------|----------------------------|----------------------------|----------------------|-----------------------------------------|-----------------------------------------|--------------------------------|----------------------------|
| Test species                                     |                              | <i>Oncorhynchus mykiss</i> | <i>Pimephales promelas</i> | <i>Daphnia magna</i>       | <i>Daphnia magna</i> | <i>Pseudokirchneriella subcapitata</i>  | <i>Myriophyllum aquaticum</i>           |                                | <i>Chironomus riparius</i> |
| Endpoint (µg/L)                                  |                              | LC <sub>50</sub><br>100000 | NOEC<br>12000              | EC <sub>50</sub><br>690000 | NOEC<br>15000        | E <sub>r</sub> C <sub>50</sub><br>31900 | E <sub>r</sub> C <sub>50</sub><br>72000 | Endpoint (µg/kg)               | NOEC<br>786500             |
| AF                                               |                              | 100                        | 10                         | 100                        | 10                   | 10                                      | 10                                      | AF                             | 10                         |
| RAC (µg/L)                                       |                              | 1000                       | 1200                       | 6900                       | 1500                 | 3190                                    | 7200                                    | RAC (µg/kg)                    | 78650                      |
| FOCUS Scenario                                   | PEC <sub>sw,max</sub> (µg/L) |                            |                            |                            |                      |                                         |                                         | PEC <sub>sed,max</sub> (µg/kg) |                            |
| <b>Step 1 (DT<sub>50</sub> wat/sed = 89.9 d)</b> |                              |                            |                            |                            |                      |                                         |                                         |                                |                            |
|                                                  | 33.498                       | 0.033                      | 0.028                      | 0.005                      | 0.022                | 0.011                                   | 0.005                                   | 821.787                        | 0.010                      |
| <b>Step 2 (DT<sub>50</sub> wat/sed = 89.9 d)</b> |                              |                            |                            |                            |                      |                                         |                                         |                                |                            |
| N-Europe                                         | 16.402                       | 0.016                      | 0.014                      | 0.002                      | 0.011                | 0.005                                   | 0.002                                   | 413.697                        | 0.005                      |
| S-Europe                                         | 13.192                       | 0.013                      | 0.011                      | 0.002                      | 0.009                | 0.004                                   | 0.002                                   | 332.136                        | 0.004                      |



**Aquatic organisms: acceptability of risk (PEC/RAC < 1) for AMPA for each organism group based on FOCUS Steps 1, 2 and 3 calculations for the use of MON 52276 in field crops<sup>1</sup> (1 × 720 g a.s./ha). Covers uses 1 a-c, 2 a-c, 6 a-b, 10 a-c.**

| Group        |  | Fish acute                 | Fish prolonged             | Inverteb. acute      | Inverteb. prolonged  | Algae                                  | Aquatic macrophytes           |  | Sed. dwell. prolonged      |
|--------------|--|----------------------------|----------------------------|----------------------|----------------------|----------------------------------------|-------------------------------|--|----------------------------|
| Test species |  | <i>Oncorhynchus mykiss</i> | <i>Pimephales promelas</i> | <i>Daphnia magna</i> | <i>Daphnia magna</i> | <i>Pseudokirchneriella subcapitata</i> | <i>Myriophyllum aquaticum</i> |  | <i>Chironomus riparius</i> |

AF: Assessment factor; PEC: Predicted environmental concentration; RAC: Regulatory acceptable concentration; PEC/RAC ratios above the relevant trigger of 1 are shown in **bold**

<sup>1</sup> covering all corresponding uses in root vegetables, potatoes, bulb vegetables, fruiting vegetables, leafy vegetables and sugar beets

**Aquatic organisms: acceptability of risk (PEC/RAC < 1) for AMPA for each organism group based on FOCUS Steps 1, 2 and 3 calculations for the use of MON 52276 in orchards<sup>1</sup> (1 × 720 g a.s./ha). Uses 4 a-c.**

| Group                                            |                              | Fish acute                 | Fish prolonged             | Inverteb. acute            | Inverteb. prolonged  | Algae                                   | Aquatic macrophytes                     |                                | Sed. dwell. prolonged      |
|--------------------------------------------------|------------------------------|----------------------------|----------------------------|----------------------------|----------------------|-----------------------------------------|-----------------------------------------|--------------------------------|----------------------------|
| Test species                                     |                              | <i>Oncorhynchus mykiss</i> | <i>Pimephales promelas</i> | <i>Daphnia magna</i>       | <i>Daphnia magna</i> | <i>Pseudokirchneriella subcapitata</i>  | <i>Myriophyllum aquaticum</i>           |                                | <i>Chironomus riparius</i> |
| Endpoint (µg/L)                                  |                              | LC <sub>50</sub><br>100000 | NOEC<br>12000              | EC <sub>50</sub><br>690000 | NOEC<br>15000        | E <sub>r</sub> C <sub>50</sub><br>31900 | E <sub>r</sub> C <sub>50</sub><br>72000 | Endpoint (µg/kg)               | NOEC<br>786500             |
| AF                                               |                              | 100                        | 10                         | 100                        | 10                   | 10                                      | 10                                      | AF                             | 10                         |
| RAC (µg/L)                                       |                              | 1000                       | 1200                       | 6900                       | 1500                 | 3190                                    | 7200                                    | RAC (µg/kg)                    | 78650                      |
| FOCUS Scenario                                   | PEC <sub>sw,max</sub> (µg/L) |                            |                            |                            |                      |                                         |                                         | PEC <sub>sed,max</sub> (µg/kg) |                            |
| <b>Step 1 (DT<sub>50 wat/sed</sub> = 89.9 d)</b> |                              |                            |                            |                            |                      |                                         |                                         |                                |                            |
|                                                  | 33.498                       | 0.033                      | 0.028                      | 0.005                      | 0.022                | 0.011                                   | 0.005                                   | 821.787                        | 0.010                      |
| <b>Step 2 (DT<sub>50 wat/sed</sub> = 89.9 d)</b> |                              |                            |                            |                            |                      |                                         |                                         |                                |                            |
| N-Europe                                         | 16.402                       | 0.016                      | 0.014                      | 0.002                      | 0.011                | 0.005                                   | 0.002                                   | 413.697                        | 0.005                      |
| S-Europe                                         | 13.192                       | 0.013                      | 0.011                      | 0.002                      | 0.009                | 0.004                                   | 0.002                                   | 332.136                        | 0.004                      |

**Aquatic organisms: acceptability of risk (PEC/RAC < 1) for AMPA for each organism group based on FOCUS Steps 1, 2 and 3 calculations for the use of MON 52276 in orchards<sup>1</sup> (1 × 720 g a.s./ha). Uses 4 a-c.**

| Group        |  | Fish acute                 | Fish prolonged             | Inverteb. acute      | Inverteb. prolonged  | Algae                                  | Aquatic macrophytes           |  | Sed. dwell. prolonged      |
|--------------|--|----------------------------|----------------------------|----------------------|----------------------|----------------------------------------|-------------------------------|--|----------------------------|
| Test species |  | <i>Oncorhynchus mykiss</i> | <i>Pimephales promelas</i> | <i>Daphnia magna</i> | <i>Daphnia magna</i> | <i>Pseudokirchneriella subcapitata</i> | <i>Myriophyllum aquaticum</i> |  | <i>Chironomus riparius</i> |

AF: Assessment factor; PEC: Predicted environmental concentration; RAC: Regulatory acceptable concentration; PEC/RAC ratios above the relevant trigger of 1 are shown in **bold**

<sup>1</sup> covering all corresponding uses in root vegetables, potatoes, bulb vegetables, fruiting vegetables, leafy vegetables and sugar beets

**Aquatic organisms: acceptability of risk (PEC/RAC < 1) for AMPA for each organism group based on FOCUS Steps 1, 2 and 3 calculations for the use of MON 52276 in vines (1 × 720 g a.s./ha). Uses 5 a-c.**

| Group                                            |                              | Fish acute                 | Fish prolonged             | Inverteb. acute            | Inverteb. prolonged  | Algae                                   | Aquatic macrophytes                     |                                | Sed. dwell. prolonged      |
|--------------------------------------------------|------------------------------|----------------------------|----------------------------|----------------------------|----------------------|-----------------------------------------|-----------------------------------------|--------------------------------|----------------------------|
| Test species                                     |                              | <i>Oncorhynchus mykiss</i> | <i>Pimephales promelas</i> | <i>Daphnia magna</i>       | <i>Daphnia magna</i> | <i>Pseudokirchneriella subcapitata</i>  | <i>Myriophyllum aquaticum</i>           |                                | <i>Chironomus riparius</i> |
| Endpoint (µg/L)                                  |                              | LC <sub>50</sub><br>100000 | NOEC<br>12000              | EC <sub>50</sub><br>690000 | NOEC<br>15000        | E <sub>r</sub> C <sub>50</sub><br>31900 | E <sub>r</sub> C <sub>50</sub><br>72000 | Endpoint (µg/kg)               | NOEC<br>786500             |
| AF                                               |                              | 100                        | 10                         | 100                        | 10                   | 10                                      | 10                                      | AF                             | 10                         |
| RAC (µg/L)                                       |                              | 1000                       | 1200                       | 6900                       | 1500                 | 3190                                    | 7200                                    | RAC (µg/kg)                    | 78650                      |
| FOCUS Scenario                                   | PEC <sub>sw,max</sub> (µg/L) |                            |                            |                            |                      |                                         |                                         | PEC <sub>sed,max</sub> (µg/kg) |                            |
| <b>Step 1 (DT<sub>50</sub> wat/sed = 89.9 d)</b> |                              |                            |                            |                            |                      |                                         |                                         |                                |                            |
|                                                  | 33.498                       | 0.033                      | 0.028                      | 0.005                      | 0.022                | 0.011                                   | 0.005                                   | 821.787                        | 0.010                      |
| <b>Step 2 (DT<sub>50</sub> wat/sed = 89.9 d)</b> |                              |                            |                            |                            |                      |                                         |                                         |                                |                            |
| N-Europe                                         | 16.402                       | 0.016                      | 0.014                      | 0.002                      | 0.011                | 0.005                                   | 0.002                                   | 413.697                        | 0.005                      |

**Aquatic organisms: acceptability of risk (PEC/RAC < 1) for AMPA for each organism group based on FOCUS Steps 1, 2 and 3 calculations for the use of MON 52276 in vines (1 × 720 g a.s./ha). Uses 5 a-c.**

| Group        |        | Fish acute                 | Fish prolonged             | Inverteb. acute      | Inverteb. prolonged  | Algae                                  | Aquatic macrophytes           |         | Sed. dwell. prolonged      |
|--------------|--------|----------------------------|----------------------------|----------------------|----------------------|----------------------------------------|-------------------------------|---------|----------------------------|
| Test species |        | <i>Oncorhynchus mykiss</i> | <i>Pimephales promelas</i> | <i>Daphnia magna</i> | <i>Daphnia magna</i> | <i>Pseudokirchneriella subcapitata</i> | <i>Myriophyllum aquaticum</i> |         | <i>Chironomus riparius</i> |
| S-Europe     | 13.192 | 0.013                      | 0.011                      | 0.002                | 0.009                | 0.004                                  | 0.002                         | 332.136 | 0.004                      |

AF: Assessment factor; PEC: Predicted environmental concentration; RAC: Regulatory acceptable concentration; PEC/RAC ratios above the relevant trigger of 1 are shown in **bold**

**Aquatic organisms: acceptability of risk (PEC/RAC < 1) for HMPA for each organism group based on FOCUS Steps 1, 2 and 3 calculations for the use of MON 52276 in field crops<sup>1</sup> (1 × 720 g a.s./ha). Covers uses 1 a-c, 2 a-c, 6 a-b, 10 a-c.**

| Group           |                              | Fish acute                | Inverteb. acute            | Algae                                    | Aquatic macrophytes                      |                                | Sed. dwell. prolonged                    |
|-----------------|------------------------------|---------------------------|----------------------------|------------------------------------------|------------------------------------------|--------------------------------|------------------------------------------|
| Test species    |                              | -                         | <i>Daphnia magna</i>       | <i>Pseudokirchneriella subcapitata</i>   | <i>Lemna gibba</i>                       |                                | <i>Chironomus riparius</i> <sup>\$</sup> |
| Endpoint (µg/L) |                              | LC <sub>50</sub><br>32000 | EC <sub>50</sub><br>100000 | E <sub>r</sub> C <sub>50</sub><br>120000 | E <sub>r</sub> C <sub>50</sub><br>123000 | Endpoint (µg/kg)               | NOEC<br>15400 µg/kg sed.                 |
| AF              |                              | 100                       | 100                        | 10                                       | 10                                       | AF                             | 10                                       |
| RAC (µg/L)      |                              | 320                       | 1000                       | 12000                                    | 12300                                    | RAC (µg/kg)                    | 1540 µg/kg sed.                          |
| FOCUS Scenario  | PEC <sub>sw,max</sub> (µg/L) |                           |                            |                                          |                                          | PEC <sub>sed,max</sub> (µg/kg) |                                          |
| <b>Step 1</b>   |                              |                           |                            |                                          |                                          |                                |                                          |
|                 | 16.128                       | 0.050                     | 0.016                      | 0.001                                    | 0.001                                    | 113.90                         | 0.074                                    |
| <b>Step 2</b>   |                              |                           |                            |                                          |                                          |                                |                                          |
| N-Europe        | 8.144                        | 0.025                     | 0.008                      | <0.001                                   | <0.001                                   | 57.53                          | 0.037                                    |
| S-Europe        | 6.602                        | 0.021                     | 0.007                      | <0.001                                   | <0.001                                   | 46.63                          | 0.030                                    |

**Aquatic organisms: acceptability of risk (PEC/RAC < 1) for HMPA for each organism group based on FOCUS Steps 1, 2 and 3 calculations for the use of MON 52276 in field crops<sup>1</sup> (1 × 720 g a.s./ha). Covers uses 1 a-c, 2 a-c, 6 a-b, 10 a-c.**

| Group        |  | Fish acute | Inverteb. acute      | Algae                                  | Aquatic macrophytes |  | Sed. dwell. prolonged                    |
|--------------|--|------------|----------------------|----------------------------------------|---------------------|--|------------------------------------------|
| Test species |  | -          | <i>Daphnia magna</i> | <i>Pseudokirchneriella subcapitata</i> | <i>Lemna gibba</i>  |  | <i>Chironomus riparius</i> <sup>\$</sup> |

AF: Assessment factor; PEC: Predicted environmental concentration; RAC: Regulatory acceptable concentration; PEC/RAC ratios above the relevant trigger of 1 are shown in **bold**

<sup>1</sup> covering all corresponding uses in root vegetables, potatoes, bulb vegetables, fruiting vegetables, leafy vegetables and sugar beets

<sup>\$</sup> added following open point of section 4 (expert consultation 4.2): “RMS to update the PEC sediment calculations for HMPA using a default Koc value of 10000 mL/g and to include the metabolite HMPA in the residue definition for sediment in both an update to the RAR and the list of endpoints.” As worst case the metabolite was considered 10 times more toxic than glyphosate.

**Aquatic organisms: acceptability of risk (PEC/RAC < 1) for HMPA for each organism group based on FOCUS Steps 1, 2 and 3 calculations for the use of MON 52276 in orchards<sup>1</sup> (1 × 720 g a.s./ha). Uses 4 a-c.**

| Group           |                              | Fish acute                | Inverteb. acute            | Algae                                    | Aquatic macrophytes                      |                                | Sed. dwell. prolonged                    |
|-----------------|------------------------------|---------------------------|----------------------------|------------------------------------------|------------------------------------------|--------------------------------|------------------------------------------|
| Test species    |                              | -                         | <i>Daphnia magna</i>       | <i>Pseudokirchneriella subcapitata</i>   | <i>Lemna gibba</i>                       |                                | <i>Chironomus riparius</i> <sup>\$</sup> |
| Endpoint (µg/L) |                              | LC <sub>50</sub><br>32000 | EC <sub>50</sub><br>100000 | E <sub>r</sub> C <sub>50</sub><br>120000 | E <sub>r</sub> C <sub>50</sub><br>123000 | Endpoint (µg/kg)               | NOEC<br>15400 µg/kg sed.                 |
| AF              |                              | 100                       | 100                        | 10                                       | 10                                       | AF                             | 10                                       |
| RAC (µg/L)      |                              | 320                       | 1000                       | 12000                                    | 12300                                    | RAC (µg/kg)                    | 1540 µg/kg sed.                          |
| FOCUS Scenario  | PEC <sub>sw,max</sub> (µg/L) |                           |                            |                                          |                                          | PEC <sub>sed,max</sub> (µg/kg) |                                          |
| <b>Step 1</b>   |                              |                           |                            |                                          |                                          |                                |                                          |
|                 | 16.128                       | 0.050                     | 0.016                      | 0.001                                    | 0.001                                    | 113.90                         | 0.074                                    |

**Aquatic organisms: acceptability of risk (PEC/RAC < 1) for HMPA for each organism group based on FOCUS Steps 1, 2 and 3 calculations for the use of MON 52276 in orchards<sup>1</sup> (1 × 720 g a.s./ha). Uses 4 a-c.**

| Group         |       | Fish acute | Inverteb. acute      | Algae                                  | Aquatic macrophytes |       | Sed. dwell. prolonged                   |
|---------------|-------|------------|----------------------|----------------------------------------|---------------------|-------|-----------------------------------------|
| Test species  |       | -          | <i>Daphnia magna</i> | <i>Pseudokirchneriella subcapitata</i> | <i>Lemna gibba</i>  |       | <i>Chironomus riparius</i> <sup>§</sup> |
| <b>Step 2</b> |       |            |                      |                                        |                     |       |                                         |
| N-Europe      | 8.144 | 0.025      | 0.008                | <0.001                                 | <0.001              | 57.53 | 0.037                                   |
| S-Europe      | 6.602 | 0.021      | 0.007                | <0.001                                 | <0.001              | 46.63 | 0.030                                   |

AF: Assessment factor; PEC: Predicted environmental concentration; RAC: Regulatory acceptable concentration; PEC/RAC ratios above the relevant trigger of 1 are shown in **bold**

<sup>1</sup> covering all corresponding uses in root vegetables, potatoes, bulb vegetables, fruiting vegetables, leafy vegetables and sugar beets

<sup>§</sup> added following open point of section 4 (expert consultation 4.2): “RMS to update the PEC sediment calculations for HMPA using a default Koc value of 10000 mL/g and to include the metabolite HMPA in the residue definition for sediment in both an update to the RAR and the list of endpoints.” As worst case the metabolite was considered 10 times more toxic than glyphosate.

**Aquatic organisms: acceptability of risk (PEC/RAC < 1) for HMPA for each organism group based on FOCUS Steps 1, 2 and 3 calculations for the use of MON 52276 in vines (1 × 720 g a.s./ha). Uses 5 a-c.**

| Group           |  | Fish acute                | Inverteb. acute            | Algae                                    | Aquatic macrophytes                      |                         | Sed. dwell. prolonged                   |
|-----------------|--|---------------------------|----------------------------|------------------------------------------|------------------------------------------|-------------------------|-----------------------------------------|
| Test species    |  | -                         | <i>Daphnia magna</i>       | <i>Pseudokirchneriella subcapitata</i>   | <i>Lemna gibba</i>                       |                         | <i>Chironomus riparius</i> <sup>§</sup> |
| Endpoint (µg/L) |  | LC <sub>50</sub><br>32000 | EC <sub>50</sub><br>100000 | E <sub>r</sub> C <sub>50</sub><br>120000 | E <sub>r</sub> C <sub>50</sub><br>123000 | <b>Endpoint (µg/kg)</b> | NOEC<br>15400 µg/kg sed.                |
| AF              |  | 100                       | 100                        | 10                                       | 10                                       | <b>AF</b>               | 10                                      |
| RAC (µg/L)      |  | 320                       | 1000                       | 12000                                    | 12300                                    | <b>RAC (µg/kg)</b>      | 1540 µg/kg sed.                         |

**Aquatic organisms: acceptability of risk (PEC/RAC < 1) for HMPA for each organism group based on FOCUS Steps 1, 2 and 3 calculations for the use of MON 52276 in vines (1 × 720 g a.s./ha). Uses 5 a-c.**

| Group          |                              | Fish acute | Inverteb. acute      | Algae                                  | Aquatic macrophytes |                                | Sed. dwell. prolonged                   |
|----------------|------------------------------|------------|----------------------|----------------------------------------|---------------------|--------------------------------|-----------------------------------------|
| Test species   |                              | -          | <i>Daphnia magna</i> | <i>Pseudokirchneriella subcapitata</i> | <i>Lemna gibba</i>  |                                | <i>Chironomus riparius</i> <sup>§</sup> |
| FOCUS Scenario | PEC <sub>sw,max</sub> (µg/L) |            |                      |                                        |                     | PEC <sub>sed,max</sub> (µg/kg) |                                         |
| <b>Step 1</b>  |                              |            |                      |                                        |                     |                                |                                         |
|                | 16.128                       | 0.050      | 0.016                | 0.001                                  | 0.001               | 113.90                         | 0.074                                   |
| <b>Step 2</b>  |                              |            |                      |                                        |                     |                                |                                         |
| N-Europe       | 8.144                        | 0.025      | 0.008                | <0.001                                 | <0.001              | 57.53                          | 0.037                                   |
| S-Europe       | 6.602                        | 0.021      | 0.007                | <0.001                                 | <0.001              | 46.63                          | 0.030                                   |

AF: Assessment factor; PEC: Predicted environmental concentration; RAC: Regulatory acceptable concentration; PEC/RAC ratios above the relevant trigger of 1 are shown in **bold**

<sup>§</sup> added following open point of section 4 (expert consultation 4.2): “RMS to update the PEC sediment calculations for HMPA using a default Koc value of 10000 mL/g and to include the metabolite HMPA in the residue definition for sediment in both an update to the RAR and the list of endpoints.” As worst case the metabolite was considered 10 times more toxic than glyphosate.

**Aquatic organisms: acceptability of risk (PEC/RAC < 1) for P1a and M3.3 for sediment dwellers based on FOCUS Steps 1, 2 and 3 for the use of MON 52276 in field crops<sup>1</sup> (1 × 720 g a.s./ha). Covers uses 1 a-c, 2 a-c, 6 a-b, 10 a-c.**

| Group           |                  | Sed. dwell. prolonged      |
|-----------------|------------------|----------------------------|
| Test species    |                  | <i>Chironomus riparius</i> |
| Endpoint (µg/L) | Endpoint (µg/kg) | NOEC*<br>78650             |
| AF              | AF               | 10                         |

**Aquatic organisms: acceptability of risk (PEC/RAC < 1) for P1a and M3.3 for sediment dwellers based on FOCUS Steps 1, 2 and 3 for the use of MON 52276 in field crops<sup>1</sup> (1 × 720 g a.s./ha). Covers uses 1 a-c, 2 a-c, 6 a-b, 10 a-c.**

| Group          |                                | Sed. dwell. prolonged      |
|----------------|--------------------------------|----------------------------|
| Test species   |                                | <i>Chironomus riparius</i> |
| RAC (µg/L)     | RAC (µg/kg)                    | 7865                       |
| FOCUS Scenario | PEC <sub>sed,max</sub> (µg/kg) |                            |
| <b>Step 1</b>  |                                |                            |
|                | 183.026                        | 0.023                      |
| <b>Step 2</b>  |                                |                            |
| N-Europe       | 92.436                         | 0.012                      |
| S-Europe       | 74.929                         | 0.010                      |

AF: Assessment factor; PEC: Predicted environmental concentration; RAC: Regulatory acceptable concentration; PEC/RAC ratios above the relevant trigger of 1 are shown in **bold**

<sup>1</sup> covering all corresponding uses in root vegetables, potatoes, bulb vegetables, fruiting vegetables, leafy vegetables and sugar beets

\* considered ten times more toxic than AMPA

**Aquatic organisms: acceptability of risk (PEC/RAC < 1) for P1a and M3.3 for sediment dwellers based on FOCUS Steps 1, 2 and 3 calculations for the use of MON 52276 in orchards<sup>1</sup> (1 × 720 g a.s./ha). Uses 4 a-c.**

| Group           |                                | Sed. dwell. prolonged      |
|-----------------|--------------------------------|----------------------------|
| Test species    |                                | <i>Chironomus riparius</i> |
| Endpoint (µg/L) | Endpoint (µg/kg)               | NOEC*<br>78650             |
| AF              | AF                             | 10                         |
| RAC (µg/L)      | RAC (µg/kg)                    | 7865                       |
| FOCUS Scenario  | PEC <sub>sed,max</sub> (µg/kg) |                            |

**Aquatic organisms: acceptability of risk (PEC/RAC < 1) for P1a and M3.3 for sediment dwellers based on FOCUS Steps 1, 2 and 3 calculations for the use of MON 52276 in orchards<sup>1</sup> (1 × 720 g a.s./ha). Uses 4 a-c.**

| Group         |         | Sed. dwell. prolonged      |
|---------------|---------|----------------------------|
| Test species  |         | <i>Chironomus riparius</i> |
| <b>Step 1</b> |         |                            |
|               | 183.026 | 0.023                      |
| <b>Step 2</b> |         |                            |
| N-Europe      | 92.436  | 0.012                      |
| S-Europe      | 74.929  | 0.010                      |

AF: Assessment factor; PEC: Predicted environmental concentration; RAC: Regulatory acceptable concentration; PEC/RAC ratios above the relevant trigger of 1 are shown in **bold**

<sup>1</sup> covering all corresponding uses in pome/stone fruit and olives

\* considered ten times more toxic than AMPA

**Aquatic organisms: acceptability of risk (PEC/RAC < 1) for P1a and M3.3 for sediment dwellers based on FOCUS Steps 1, 2 and 3 calculations for the use of MON 52276 in vines (1 × 720 g a.s./ha). Uses 5 a-c.**

| Group           |                                | Sed. dwell. prolonged      |
|-----------------|--------------------------------|----------------------------|
| Test species    |                                | <i>Chironomus riparius</i> |
| Endpoint (µg/L) | Endpoint (µg/kg)               | NOEC*                      |
|                 |                                | 78650                      |
| AF              | AF                             | 10                         |
| RAC (µg/L)      | RAC (µg/kg)                    | 7865                       |
| FOCUS Scenario  | PEC <sub>sed,max</sub> (µg/kg) |                            |
| <b>Step 1</b>   |                                |                            |
|                 | 183.026                        | 0.023                      |



**Aquatic organisms: acceptability of risk (PEC/RAC < 1) for P1a and M3.3 for sediment dwellers based on FOCUS Steps 1, 2 and 3 calculations for the use of MON 52276 in vines (1 × 720 g a.s./ha). Uses 5 a-c.**

| Group         |        | Sed. dwell. prolonged      |
|---------------|--------|----------------------------|
| Test species  |        | <i>Chironomus riparius</i> |
| <b>Step 2</b> |        |                            |
| N-Europe      | 92.436 | 0.012                      |
| S-Europe      | 74.929 | 0.010                      |

AF: Assessment factor; PEC: Predicted environmental concentration; RAC: Regulatory acceptable concentration; PEC/RAC ratios above the relevant trigger of 1 are shown in **bold**

\* considered ten times more toxic than AMPA

**Aquatic organisms: acceptability of risk (PEC/RAC < 1) for Glyphosate for each organism group based on FOCUS Steps 1, 2 and 3 calculations for the use of MON 52276 in vegetables, root (1 × 1440 g a.s./ha). Covers uses 1 a-c, 2 a-c, 6 a-b, 10 a-c.**

| Group                    |                              | Fish acute                 | Fish prolonged           | Inverteb. acute                          | Inverteb. prolonged  | Algae                       | Aquatic macrophytes           |                                | Sed. dwell. prolonged      |
|--------------------------|------------------------------|----------------------------|--------------------------|------------------------------------------|----------------------|-----------------------------|-------------------------------|--------------------------------|----------------------------|
| Test species             |                              | <i>Lepomis macrochirus</i> | <i>Brachydanio rerio</i> | <i>Crassostrea gigas / Daphnia magna</i> | <i>Daphnia magna</i> | <i>Skeletonema costatum</i> | <i>Myriophyllum aquaticum</i> |                                | <i>Chironomus riparius</i> |
| Endpoint (µg/L)          |                              | LC <sub>50</sub><br>32000  | NOEC<br>1000             | EC <sub>50</sub><br>40000                | NOEC<br>12500        | ErC <sub>50</sub><br>13500  | ErC <sub>50</sub><br>10330    | Endpoint (µg/kg)               | NOEC<br>154000             |
| AF                       |                              | 100                        | 10                       | 100                                      | 10                   | 10                          | 10                            | AF                             | 10                         |
| RAC (µg/L)               |                              | 320                        | 100                      | 400                                      | 1250                 | 1350                        | 1033                          | RAC (µg/kg)                    | 15400                      |
| FOCUS Scenario           | PEC <sub>sw,max</sub> (µg/L) |                            |                          |                                          |                      |                             |                               | PEC <sub>sed,max</sub> (µg/kg) |                            |
| <b>Step 1</b>            |                              |                            |                          |                                          |                      |                             |                               |                                |                            |
|                          | 83.859                       | 0.262                      | 0.839                    | 0.210                                    | 0.067                | 0.062                       | 0.081                         | 3140                           | 0.204                      |
| <b>Step 2</b>            |                              |                            |                          |                                          |                      |                             |                               |                                |                            |
| N-Europe                 | 37.443                       | 0.117                      | 0.374                    | 0.094                                    | 0.030                | 0.028                       | 0.036                         | 1590                           | 0.103                      |
| S-Europe                 | 30.501                       | 0.095                      | 0.305                    | 0.076                                    | 0.024                | 0.023                       | 0.030                         | 1280                           | 0.083                      |
| <b>Step 3</b>            |                              |                            |                          |                                          |                      |                             |                               |                                |                            |
| D3/ditch                 | 9.007                        | 0.028                      | 0.090                    | 0.023                                    | 0.007                | 0.007                       | 0.009                         | 8.308                          | <0.001                     |
| D6/ditch                 | 9.030                        | 0.028                      | 0.090                    | 0.023                                    | 0.007                | 0.007                       | 0.009                         | 13.950                         | <0.001                     |
| R1/pond                  | 1.004                        | 0.003                      | 0.010                    | 0.003                                    | 0.001                | 0.001                       | 0.001                         | 40.990                         | 0.003                      |
| R1/stream                | 5.936                        | 0.019                      | 0.059                    | 0.015                                    | 0.005                | 0.004                       | 0.006                         | 250.900                        | 0.016                      |
| R2/stream                | 7.968                        | 0.025                      | 0.080                    | 0.020                                    | 0.006                | 0.006                       | 0.008                         | 1301.300                       | 0.085                      |
| R2/stream <sub>2nd</sub> | 7.968                        | 0.025                      | 0.080                    | 0.020                                    | 0.006                | 0.006                       | 0.008                         | 1388.900                       | 0.091                      |

**Aquatic organisms: acceptability of risk (PEC/RAC < 1) for Glyphosate for each organism group based on FOCUS Steps 1, 2 and 3 calculations for the use of MON 52276 in vegetables, root (1 × 1440 g a.s./ha). Covers uses 1 a-c, 2 a-c, 6 a-b, 10 a-c.**

| Group        |       | Fish acute                 | Fish prolonged           | Inverteb. acute                          | Inverteb. prolonged  | Algae                       | Aquatic macrophytes           |         | Sed. dwell. prolonged      |
|--------------|-------|----------------------------|--------------------------|------------------------------------------|----------------------|-----------------------------|-------------------------------|---------|----------------------------|
| Test species |       | <i>Lepomis macrochirus</i> | <i>Brachydanio rerio</i> | <i>Crassostrea gigas / Daphnia magna</i> | <i>Daphnia magna</i> | <i>Skeletonema costatum</i> | <i>Myriophyllum aquaticum</i> |         | <i>Chironomus riparius</i> |
| R3/stream    | 8.381 | 0.026                      | 0.084                    | 0.021                                    | 0.007                | 0.006                       | 0.008                         | 189.900 | 0.012                      |
| R4/stream    | 5.860 | 0.018                      | 0.059                    | 0.015                                    | 0.005                | 0.004                       | 0.006                         | 372.700 | 0.024                      |

AF: Assessment factor; PEC: Predicted environmental concentration; RAC: Regulatory acceptable concentration; PEC/RAC ratios above the relevant trigger of 1 are shown in **bold**

**Aquatic organisms: acceptability of risk (PEC/RAC < 1) for Glyphosate for each organism group based on FOCUS Steps 1, 2 and 3 calculations for the use of MON 52276 in potatoes (1 × 1440 g a.s./ha). Covers uses 1 a-c, 2 a-c, 6 a-b, 10 a-c.**

| Group           |                              | Fish acute                 | Fish prolonged           | Inverteb. acute                          | Inverteb. prolonged  | Algae                       | Aquatic macrophytes           |                                | Sed. dwell. prolonged      |
|-----------------|------------------------------|----------------------------|--------------------------|------------------------------------------|----------------------|-----------------------------|-------------------------------|--------------------------------|----------------------------|
| Test species    |                              | <i>Lepomis macrochirus</i> | <i>Brachydanio rerio</i> | <i>Crassostrea gigas / Daphnia magna</i> | <i>Daphnia magna</i> | <i>Skeletonema costatum</i> | <i>Myriophyllum aquaticum</i> |                                | <i>Chironomus riparius</i> |
| Endpoint (µg/L) |                              | LC <sub>50</sub><br>32000  | NOEC<br>1000             | EC <sub>50</sub><br>40000                | NOEC<br>12500        | ErC <sub>50</sub><br>13500  | ErC <sub>50</sub><br>10330    | Endpoint (µg/kg)               | NOEC<br>154000             |
| AF              |                              | 100                        | 10                       | 100                                      | 10                   | 10                          | 10                            | AF                             | 10                         |
| RAC (µg/L)      |                              | 320                        | 100                      | 400                                      | 1250                 | 1350                        | 1033                          | RAC (µg/kg)                    | 15400                      |
| FOCUS Scenario  | PEC <sub>sw,max</sub> (µg/L) |                            |                          |                                          |                      |                             |                               | PEC <sub>sed,max</sub> (µg/kg) |                            |
| <b>Step 1</b>   |                              |                            |                          |                                          |                      |                             |                               |                                |                            |
|                 | 83.859                       | 0.262                      | 0.839                    | 0.210                                    | 0.067                | 0.062                       | 0.081                         | 3140                           | 0.204                      |

**Aquatic organisms: acceptability of risk (PEC/RAC < 1) for Glyphosate for each organism group based on FOCUS Steps 1, 2 and 3 calculations for the use of MON 52276 in potatoes (1 × 1440 g a.s./ha). Covers uses 1 a-c, 2 a-c, 6 a-b, 10 a-c.**

| Group                    |        | Fish acute                 | Fish prolonged           | Inverteb. acute                                 | Inverteb. prolonged  | Algae                       | Aquatic macrophytes           |          | Sed. dwell. prolonged      |
|--------------------------|--------|----------------------------|--------------------------|-------------------------------------------------|----------------------|-----------------------------|-------------------------------|----------|----------------------------|
| Test species             |        | <i>Lepomis macrochirus</i> | <i>Brachydanio rerio</i> | <i>Crassostrea gigas</i> / <i>Daphnia magna</i> | <i>Daphnia magna</i> | <i>Skeletonema costatum</i> | <i>Myriophyllum aquaticum</i> |          | <i>Chironomus riparius</i> |
| <b>Step 2</b>            |        |                            |                          |                                                 |                      |                             |                               |          |                            |
| N-Europe                 | 37.443 | 0.117                      | 0.374                    | 0.094                                           | 0.030                | 0.028                       | 0.036                         | 1590     | 0.103                      |
| S-Europe                 | 30.501 | 0.095                      | 0.305                    | 0.076                                           | 0.024                | 0.023                       | 0.030                         | 1280     | 0.083                      |
| <b>Step 3</b>            |        |                            |                          |                                                 |                      |                             |                               |          |                            |
| D3/ditch                 | 7.422  | 0.023                      | 0.074                    | 0.019                                           | 0.006                | 0.005                       | 0.007                         | 5.125    | <0.001                     |
| D4/pond                  | 0.292  | 0.001                      | 0.003                    | 0.001                                           | 0.000                | 0.000                       | 0.000                         | 5.082    | <0.001                     |
| D4/stream                | 6.314  | 0.020                      | 0.063                    | 0.016                                           | 0.005                | 0.005                       | 0.006                         | 0.502    | <0.001                     |
| D6/ditch                 | 7.473  | 0.023                      | 0.075                    | 0.019                                           | 0.006                | 0.006                       | 0.007                         | 15.430   | 0.001                      |
| D6/ditch 2 <sup>nd</sup> | 7.496  | 0.023                      | 0.075                    | 0.019                                           | 0.006                | 0.006                       | 0.007                         | 27.250   | 0.002                      |
| R1/pond                  | 1.179  | 0.004                      | 0.012                    | 0.003                                           | 0.001                | 0.001                       | 0.001                         | 48.470   | 0.003                      |
| R1/stream                | 5.147  | 0.016                      | 0.051                    | 0.013                                           | 0.004                | 0.004                       | 0.005                         | 294.400  | 0.019                      |
| R2/stream                | 6.909  | 0.022                      | 0.069                    | 0.017                                           | 0.006                | 0.005                       | 0.007                         | 1547.900 | 0.102                      |
| R3/stream                | 7.267  | 0.023                      | 0.073                    | 0.018                                           | 0.006                | 0.005                       | 0.007                         | 614.100  | 0.040                      |

AF: Assessment factor; PEC: Predicted environmental concentration; RAC: Regulatory acceptable concentration; PEC/RAC ratios above the relevant trigger of 1 are shown in **bold**

**Aquatic organisms: acceptability of risk (PEC/RAC < 1) for Glyphosate for each organism group based on FOCUS Steps 1, 2 and 3 calculations for the use of MON 52276 in vegetables, bulb (1 × 1440 g a.s./ha). Covers uses 1 a-c, 2 a-c, 6 a-b, 10 a-c.**

| Group                       |                              | Fish acute                 | Fish prolonged           | Inverteb. acute                          | Inverteb. prolonged  | Algae                       | Aquatic macrophytes           |                                | Sed. dwell. prolonged      |
|-----------------------------|------------------------------|----------------------------|--------------------------|------------------------------------------|----------------------|-----------------------------|-------------------------------|--------------------------------|----------------------------|
| Test species                |                              | <i>Lepomis macrochirus</i> | <i>Brachydanio rerio</i> | <i>Crassostrea gigas / Daphnia magna</i> | <i>Daphnia magna</i> | <i>Skeletonema costatum</i> | <i>Myriophyllum aquaticum</i> |                                | <i>Chironomus riparius</i> |
| Endpoint (µg/L)             |                              | LC <sub>50</sub><br>32000  | NOEC<br>1000             | EC <sub>50</sub><br>40000                | NOEC<br>12500        | ErC <sub>50</sub><br>13500  | ErC <sub>50</sub><br>10330    | Endpoint (µg/kg)               | NOEC<br>154000             |
| AF                          |                              | 100                        | 10                       | 100                                      | 10                   | 10                          | 10                            | AF                             | 10                         |
| RAC (µg/L)                  |                              | 320                        | 100                      | 400                                      | 1250                 | 1350                        | 1033                          | RAC (µg/kg)                    | 15400                      |
| FOCUS Scenario              | PEC <sub>sw,max</sub> (µg/L) |                            |                          |                                          |                      |                             |                               | PEC <sub>sed,max</sub> (µg/kg) |                            |
| <b>Step 1</b>               |                              |                            |                          |                                          |                      |                             |                               |                                |                            |
|                             | 83.859                       | 0.262                      | 0.839                    | 0.210                                    | 0.067                | 0.062                       | 0.081                         | 3140                           | 0.204                      |
| <b>Step 2</b>               |                              |                            |                          |                                          |                      |                             |                               |                                |                            |
| N-Europe                    | 37.443                       | 0.117                      | 0.374                    | 0.094                                    | 0.030                | 0.028                       | 0.036                         | 1590                           | 0.103                      |
| S-Europe                    | 30.501                       | 0.095                      | 0.305                    | 0.076                                    | 0.024                | 0.023                       | 0.030                         | 1280                           | 0.083                      |
| <b>Step 3</b>               |                              |                            |                          |                                          |                      |                             |                               |                                |                            |
| D3/ditch                    | 8.974                        | 0.028                      | 0.090                    | 0.022                                    | 0.007                | 0.007                       | 0.009                         | 5.849                          | <0.001                     |
| D4/pond                     | 0.301                        | 0.001                      | 0.003                    | 0.001                                    | 0.000                | 0.000                       | 0.000                         | 5.238                          | <0.001                     |
| D4/stream                   | 7.096                        | 0.022                      | 0.071                    | 0.018                                    | 0.006                | 0.005                       | 0.007                         | 0.483                          | <0.001                     |
| D6/ditch                    | 9.070                        | 0.028                      | 0.091                    | 0.023                                    | 0.007                | 0.007                       | 0.009                         | 31.350                         | 0.002                      |
| D6/ditch<br>2 <sup>nd</sup> | 9.070                        | 0.028                      | 0.091                    | 0.023                                    | 0.007                | 0.007                       | 0.009                         | 31.720                         | 0.002                      |
| R1/pond                     | 1.130                        | 0.004                      | 0.011                    | 0.003                                    | 0.001                | 0.001                       | 0.001                         | 45.900                         | 0.003                      |

**Aquatic organisms: acceptability of risk (PEC/RAC < 1) for Glyphosate for each organism group based on FOCUS Steps 1, 2 and 3 calculations for the use of MON 52276 in vegetables, bulb (1 × 1440 g a.s./ha). Covers uses 1 a-c, 2 a-c, 6 a-b, 10 a-c.**

| Group        |       | Fish acute                 | Fish prolonged           | Inverteb. acute                          | Inverteb. prolonged  | Algae                       | Aquatic macrophytes           |         | Sed. dwell. prolonged      |
|--------------|-------|----------------------------|--------------------------|------------------------------------------|----------------------|-----------------------------|-------------------------------|---------|----------------------------|
| Test species |       | <i>Lepomis macrochirus</i> | <i>Brachydanio rerio</i> | <i>Crassostrea gigas / Daphnia magna</i> | <i>Daphnia magna</i> | <i>Skeletonema costatum</i> | <i>Myriophyllum aquaticum</i> |         | <i>Chironomus riparius</i> |
| R1/stream    | 5.936 | 0.019                      | 0.059                    | 0.015                                    | 0.005                | 0.004                       | 0.006                         | 296     | 0.019                      |
| R2/stream    | 7.968 | 0.025                      | 0.080                    | 0.020                                    | 0.006                | 0.006                       | 0.008                         | 1305    | 0.086                      |
| R3/stream    | 8.380 | 0.026                      | 0.084                    | 0.021                                    | 0.007                | 0.006                       | 0.008                         | 265.900 | 0.017                      |
| R4/stream    | 5.934 | 0.019                      | 0.059                    | 0.015                                    | 0.005                | 0.007                       | 0.006                         | 247.200 | 0.016                      |

AF: Assessment factor; PEC: Predicted environmental concentration; RAC: Regulatory acceptable concentration; PEC/RAC ratios above the relevant trigger of 1 are shown in **bold**

**Aquatic organisms: acceptability of risk (PEC/RAC < 1) for Glyphosate for each organism group based on FOCUS Steps 1, 2 and 3 calculations for the use of MON 52276 in vegetables, fruiting (1 × 1440 g a.s./ha). Covers uses 1 a-c, 2 a-c, 6 a-b, 10 a-c.**

| Group           |                              | Fish acute                 | Fish prolonged           | Inverteb. acute                          | Inverteb. prolonged  | Algae                       | Aquatic macrophytes           |                                      | Sed. dwell. prolonged      |
|-----------------|------------------------------|----------------------------|--------------------------|------------------------------------------|----------------------|-----------------------------|-------------------------------|--------------------------------------|----------------------------|
| Test species    |                              | <i>Lepomis macrochirus</i> | <i>Brachydanio rerio</i> | <i>Crassostrea gigas / Daphnia magna</i> | <i>Daphnia magna</i> | <i>Skeletonema costatum</i> | <i>Myriophyllum aquaticum</i> |                                      | <i>Chironomus riparius</i> |
| Endpoint (µg/L) |                              | LC <sub>50</sub><br>32000  | NOEC<br>1000             | EC <sub>50</sub><br>40000                | NOEC<br>12500        | ErC <sub>50</sub><br>13500  | ErC <sub>50</sub><br>10330    | <b>Endpoint (µg/kg)</b>              | NOEC<br>154000             |
| AF              |                              | 100                        | 10                       | 100                                      | 10                   | 10                          | 10                            | <b>AF</b>                            | 10                         |
| RAC (µg/L)      |                              | 320                        | 100                      | 400                                      | 1250                 | 1350                        | 1033                          | <b>RAC (µg/kg)</b>                   | 15400                      |
| FOCUS Scenario  | PEC <sub>sw,max</sub> (µg/L) |                            |                          |                                          |                      |                             |                               | <b>PEC<sub>sed,max</sub> (µg/kg)</b> |                            |

**Aquatic organisms: acceptability of risk (PEC/RAC < 1) for Glyphosate for each organism group based on FOCUS Steps 1, 2 and 3 calculations for the use of MON 52276 in vegetables, fruiting (1 × 1440 g a.s./ha). Covers uses 1 a-c, 2 a-c, 6 a-b, 10 a-c.**

| Group         |        | Fish acute                 | Fish prolonged           | Inverteb. acute                          | Inverteb. prolonged  | Algae                       | Aquatic macrophytes           |          | Sed. dwell. prolonged      |
|---------------|--------|----------------------------|--------------------------|------------------------------------------|----------------------|-----------------------------|-------------------------------|----------|----------------------------|
| Test species  |        | <i>Lepomis macrochirus</i> | <i>Brachydanio rerio</i> | <i>Crassostrea gigas / Daphnia magna</i> | <i>Daphnia magna</i> | <i>Skeletonema costatum</i> | <i>Myriophyllum aquaticum</i> |          | <i>Chironomus riparius</i> |
| <b>Step 1</b> |        |                            |                          |                                          |                      |                             |                               |          |                            |
|               | 83.859 | 0.262                      | 0.839                    | 0.210                                    | 0.067                | 0.062                       | 0.081                         | 3140     | 0.204                      |
| <b>Step 2</b> |        |                            |                          |                                          |                      |                             |                               |          |                            |
| N-Europe      | 37.443 | 0.117                      | 0.374                    | 0.094                                    | 0.030                | 0.028                       | 0.036                         | 1590     | 0.103                      |
| S-Europe      | 30.501 | 0.095                      | 0.305                    | 0.076                                    | 0.024                | 0.023                       | 0.030                         | 1280     | 0.083                      |
| <b>Step 3</b> |        |                            |                          |                                          |                      |                             |                               |          |                            |
| D6/ditch      | 9.051  | 0.028                      | 0.091                    | 0.023                                    | 0.007                | 0.007                       | 0.009                         | 23.730   | 0.002                      |
| R2/stream     | 7.968  | 0.025                      | 0.080                    | 0.020                                    | 0.006                | 0.006                       | 0.008                         | 1675.900 | 0.110                      |
| R3/stream     | 8.381  | 0.026                      | 0.084                    | 0.021                                    | 0.007                | 0.006                       | 0.008                         | 614.100  | 0.040                      |
| R4/stream     | 5.935  | 0.019                      | 0.059                    | 0.015                                    | 0.005                | 0.004                       | 0.006                         | 344      | 0.023                      |

AF: Assessment factor; PEC: Predicted environmental concentration; RAC: Regulatory acceptable concentration; PEC/RAC ratios above the relevant trigger of 1 are shown in **bold**

**Aquatic organisms: acceptability of risk (PEC/RAC < 1) for Glyphosate for each organism group based on FOCUS Steps 1, 2 and 3 calculations for the use of MON 52276 in vegetables, leafy (1 × 1440 g a.s./ha). Covers uses 1 a-c, 2 a-c, 6 a-b, 10 a-c.**

| Group        |  | Fish acute                 | Fish prolonged           | Inverteb. acute                          | Inverteb. prolonged  | Algae                       | Aquatic macrophytes           |                 | Sed. dwell. prolonged      |
|--------------|--|----------------------------|--------------------------|------------------------------------------|----------------------|-----------------------------|-------------------------------|-----------------|----------------------------|
| Test species |  | <i>Lepomis macrochirus</i> | <i>Brachydanio rerio</i> | <i>Crassostrea gigas / Daphnia magna</i> | <i>Daphnia magna</i> | <i>Skeletonema costatum</i> | <i>Myriophyllum aquaticum</i> |                 | <i>Chironomus riparius</i> |
| Endpoint     |  | LC <sub>50</sub>           | NOEC                     | EC <sub>50</sub>                         | NOEC                 | ErC <sub>50</sub>           | ErC <sub>50</sub>             | <b>Endpoint</b> | NOEC                       |

**Aquatic organisms: acceptability of risk (PEC/RAC < 1) for Glyphosate for each organism group based on FOCUS Steps 1, 2 and 3 calculations for the use of MON 52276 in vegetables, leafy (1 × 1440 g a.s./ha). Covers uses 1 a-c, 2 a-c, 6 a-b, 10 a-c.**

| Group                       |                              | Fish acute                 | Fish prolonged           | Inverteb. acute                                 | Inverteb. prolonged  | Algae                       | Aquatic macrophytes           |                                | Sed. dwell. prolonged      |
|-----------------------------|------------------------------|----------------------------|--------------------------|-------------------------------------------------|----------------------|-----------------------------|-------------------------------|--------------------------------|----------------------------|
| Test species                |                              | <i>Lepomis macrochirus</i> | <i>Brachydanio rerio</i> | <i>Crassostrea gigas</i> / <i>Daphnia magna</i> | <i>Daphnia magna</i> | <i>Skeletonema costatum</i> | <i>Myriophyllum aquaticum</i> |                                | <i>Chironomus riparius</i> |
| (µg/L)                      |                              | 32000                      | 1000                     | 40000                                           | 12500                | 13500                       | 10330                         | (µg/kg)                        | 154000                     |
| AF                          |                              | 100                        | 10                       | 100                                             | 10                   | 10                          | 10                            | AF                             | 10                         |
| RAC (µg/L)                  |                              | 320                        | 100                      | 400                                             | 1250                 | 1350                        | 1033                          | RAC (µg/kg)                    | 15400                      |
| FOCUS Scenario              | PEC <sub>sw,max</sub> (µg/L) |                            |                          |                                                 |                      |                             |                               | PEC <sub>sed,max</sub> (µg/kg) |                            |
| <b>Step 1</b>               |                              |                            |                          |                                                 |                      |                             |                               |                                |                            |
|                             | 83.859                       | 0.262                      | 0.839                    | 0.210                                           | 0.067                | 0.062                       | 0.081                         | 3140                           | 0.204                      |
| <b>Step 2</b>               |                              |                            |                          |                                                 |                      |                             |                               |                                |                            |
| N-Europe                    | 37.443                       | 0.117                      | 0.374                    | 0.094                                           | 0.030                | 0.028                       | 0.036                         | 1590                           | 0.103                      |
| S-Europe                    | 30.501                       | 0.095                      | 0.305                    | 0.076                                           | 0.024                | 0.023                       | 0.030                         | 1280                           | 0.083                      |
| <b>Step 3</b>               |                              |                            |                          |                                                 |                      |                             |                               |                                |                            |
| D3/ditch                    | 9.005                        | 0.028                      | 0.090                    | 0.023                                           | 0.007                | 0.007                       | 0.009                         | 8.150                          | <0.001                     |
| D3/ditch<br>2 <sup>nd</sup> | 8.998                        | 0.028                      | 0.090                    | 0.022                                           | 0.007                | 0.007                       | 0.009                         | 7.445                          | <0.001                     |
| D4/pond                     | 0.302                        | 0.001                      | 0.003                    | 0.001                                           | 0.000                | 0.000                       | 0.000                         | 5.248                          | <0.001                     |
| D4/stream                   | 7.238                        | 0.023                      | 0.072                    | 0.018                                           | 0.006                | 0.005                       | 0.007                         | 0.538                          | <0.001                     |
| D6/ditch                    | 9.070                        | 0.028                      | 0.091                    | 0.023                                           | 0.007                | 0.007                       | 0.009                         | 32.690                         | 0.002                      |
| R1/pond                     | 0.951                        | 0.003                      | 0.010                    | 0.002                                           | 0.001                | 0.001                       | 0.001                         | 46.630                         | 0.003                      |
| R1/pond<br>2 <sup>nd</sup>  | 1.448                        | 0.005                      | 0.014                    | 0.004                                           | 0.001                | 0.001                       | 0.001                         | 57.330                         | 0.004                      |



**Aquatic organisms: acceptability of risk (PEC/RAC < 1) for Glyphosate for each organism group based on FOCUS Steps 1, 2 and 3 calculations for the use of MON 52276 in vegetables, leafy (1 × 1440 g a.s./ha). Covers uses 1 a-c, 2 a-c, 6 a-b, 10 a-c.**

| Group                     |       | Fish acute                 | Fish prolonged           | Inverteb. acute                          | Inverteb. prolonged  | Algae                       | Aquatic macrophytes           |          | Sed. dwell. prolonged      |
|---------------------------|-------|----------------------------|--------------------------|------------------------------------------|----------------------|-----------------------------|-------------------------------|----------|----------------------------|
| Test species              |       | <i>Lepomis macrochirus</i> | <i>Brachydanio rerio</i> | <i>Crassostrea gigas / Daphnia magna</i> | <i>Daphnia magna</i> | <i>Skeletonema costatum</i> | <i>Myriophyllum aquaticum</i> |          | <i>Chironomus riparius</i> |
| R1/stream                 | 5.933 | 0.019                      | 0.059                    | 0.015                                    | 0.005                | 0.004                       | 0.006                         | 348.600  | 0.023                      |
| R1/stream 2 <sup>nd</sup> | 5.930 | 0.019                      | 0.059                    | 0.015                                    | 0.005                | 0.004                       | 0.006                         | 809.100  | 0.053                      |
| R2/stream                 | 7.968 | 0.025                      | 0.080                    | 0.020                                    | 0.006                | 0.006                       | 0.008                         | 1367.800 | 0.090                      |
| R2/stream 2 <sup>nd</sup> | 7.968 | 0.025                      | 0.080                    | 0.020                                    | 0.006                | 0.006                       | 0.008                         | 1515.200 | 0.099                      |
| R3/stream                 | 8.381 | 0.026                      | 0.084                    | 0.021                                    | 0.007                | 0.006                       | 0.008                         | 988.600  | 0.065                      |
| R3/stream 2 <sup>nd</sup> | 8.381 | 0.026                      | 0.084                    | 0.021                                    | 0.007                | 0.007                       | 0.008                         | 613.900  | 0.040                      |
| R4/stream                 | 5.934 | 0.019                      | 0.059                    | 0.015                                    | 0.005                | 0.007                       | 0.006                         | 444      | 0.029                      |
| R4/stream 2 <sup>nd</sup> | 5.935 | 0.019                      | 0.059                    | 0.015                                    | 0.005                | 0.000                       | 0.006                         | 574.900  | 0.038                      |

AF: Assessment factor; PEC: Predicted environmental concentration; RAC: Regulatory acceptable concentration; PEC/RAC ratios above the relevant trigger of 1 are shown in **bold**

**Aquatic organisms: acceptability of risk (PEC/RAC < 1) for Glyphosate for each organism group based on FOCUS Steps 1, 2 and 3 calculations for the use of MON 52276 in sugar beets (1 × 1440 g a.s./ha). Covers uses 1 a-c, 2 a-c, 6 a-b, 10 a-c.**

| Group                |                              | Fish acute                 | Fish prolonged           | Inverteb. acute                          | Inverteb. prolonged  | Algae                       | Aquatic macrophytes           |                                | Sed. dwell. prolonged      |
|----------------------|------------------------------|----------------------------|--------------------------|------------------------------------------|----------------------|-----------------------------|-------------------------------|--------------------------------|----------------------------|
| Test species         |                              | <i>Lepomis macrochirus</i> | <i>Brachydanio rerio</i> | <i>Crassostrea gigas / Daphnia magna</i> | <i>Daphnia magna</i> | <i>Skeletonema costatum</i> | <i>Myriophyllum aquaticum</i> |                                | <i>Chironomus riparius</i> |
| Endpoint (µg/L)      |                              | LC <sub>50</sub><br>32000  | NOEC<br>1000             | EC <sub>50</sub><br>40000                | NOEC<br>12500        | ErC <sub>50</sub><br>13500  | ErC <sub>50</sub><br>10330    | Endpoint (µg/kg)               | NOEC<br>154000             |
| AF                   |                              | 100                        | 10                       | 100                                      | 10                   | 10                          | 10                            | AF                             | 10                         |
| RAC (µg/L)           |                              | 320                        | 100                      | 400                                      | 1250                 | 1350                        | 1033                          | RAC (µg/kg)                    | 15400                      |
| FOCUS Scenario       | PEC <sub>sw,max</sub> (µg/L) |                            |                          |                                          |                      |                             |                               | PEC <sub>sed,max</sub> (µg/kg) |                            |
| <b>Step 1</b>        |                              |                            |                          |                                          |                      |                             |                               |                                |                            |
|                      | 83.859                       | 0.262                      | 0.839                    | 0.210                                    | 0.067                | 0.062                       | 0.081                         | 3140                           | 0.204                      |
| <b>Step 2 Tier 2</b> |                              |                            |                          |                                          |                      |                             |                               |                                |                            |
| N-Europe             | 37.443                       | 0.117                      | 0.374                    | 0.094                                    | 0.030                | 0.028                       | 0.036                         | 1590                           | 0.103                      |
| S-Europe             | 30.501                       | 0.095                      | 0.305                    | 0.076                                    | 0.024                | 0.023                       | 0.030                         | 1280                           | 0.083                      |
| <b>Step 3</b>        |                              |                            |                          |                                          |                      |                             |                               |                                |                            |
| D3/ditch             | 7.421                        | 0.023                      | 0.074                    | 0.019                                    | 0.006                | 0.005                       | 0.007                         | 5.083                          | <0.001                     |
| D4/pond              | 0.292                        | 0.001                      | 0.003                    | 0.001                                    | 0.000                | 0.000                       | 0.000                         | 4.962                          | <0.001                     |
| D4/stream            | 6.505                        | 0.020                      | 0.065                    | 0.016                                    | 0.005                | 0.005                       | 0.006                         | 0.685                          | <0.001                     |
| R1/pond              | 1.219                        | 0.004                      | 0.012                    | 0.003                                    | 0.001                | 0.001                       | 0.001                         | 46.420                         | 0.003                      |
| R1/stream            | 5.146                        | 0.016                      | 0.051                    | 0.013                                    | 0.004                | 0.004                       | 0.005                         | 354.500                        | 0.023                      |
| R3/stream            | 7.267                        | 0.023                      | 0.073                    | 0.018                                    | 0.006                | 0.005                       | 0.007                         | 614.200                        | 0.040                      |

**Aquatic organisms: acceptability of risk (PEC/RAC < 1) for Glyphosate for each organism group based on FOCUS Steps 1, 2 and 3 calculations for the use of MON 52276 in sugar beets (1 × 1440 g a.s./ha). Covers uses 1 a-c, 2 a-c, 6 a-b, 10 a-c.**

| Group        |  | Fish acute                 | Fish prolonged           | Inverteb. acute                          | Inverteb. prolonged  | Algae                       | Aquatic macrophytes           |  | Sed. dwell. prolonged      |
|--------------|--|----------------------------|--------------------------|------------------------------------------|----------------------|-----------------------------|-------------------------------|--|----------------------------|
| Test species |  | <i>Lepomis macrochirus</i> | <i>Brachydanio rerio</i> | <i>Crassostrea gigas / Daphnia magna</i> | <i>Daphnia magna</i> | <i>Skeletonema costatum</i> | <i>Myriophyllum aquaticum</i> |  | <i>Chironomus riparius</i> |

AF: Assessment factor; PEC: Predicted environmental concentration; RAC: Regulatory acceptable concentration; PEC/RAC ratios above the relevant trigger of 1 are shown in **bold**

**Aquatic organisms: acceptability of risk (PEC/RAC < 1) for Glyphosate for each organism group based on FOCUS Steps 1, 2 and 3 calculations for the use of MON 52276 in pome/stone fruit (1 × 1440 g a.s./ha). Uses 4 a-c.**

| Group           |                              | Fish acute                 | Fish prolonged           | Inverteb. acute                          | Inverteb. prolonged  | Algae                       | Aquatic macrophytes                     |                                | Sed. dwell. prolonged      |
|-----------------|------------------------------|----------------------------|--------------------------|------------------------------------------|----------------------|-----------------------------|-----------------------------------------|--------------------------------|----------------------------|
| Test species    |                              | <i>Lepomis macrochirus</i> | <i>Brachydanio rerio</i> | <i>Crassostrea gigas / Daphnia magna</i> | <i>Daphnia magna</i> | <i>Skeletonema costatum</i> | <i>Myriophyllum aquaticum</i>           |                                | <i>Chironomus riparius</i> |
| Endpoint (µg/L) |                              | LC <sub>50</sub><br>32000  | NOEC<br>1000             | EC <sub>50</sub><br>40000                | NOEC<br>12500        | ErC <sub>50</sub><br>13500  | E <sub>r</sub> C <sub>50</sub><br>10330 | <b>Endpoint (µg/kg)</b>        | NOEC<br>154000             |
| AF              |                              | 100                        | 10                       | 100                                      | 10                   | 10                          | 10                                      | <b>AF</b>                      | 10                         |
| RAC (µg/L)      |                              | 320                        | 100                      | 400                                      | 1250                 | 1350                        | 1033                                    | <b>RAC (µg/kg)</b>             | 15400                      |
| FOCUS Scenario  | PEC <sub>sw,max</sub> (µg/L) |                            |                          |                                          |                      |                             |                                         | PEC <sub>sed,max</sub> (µg/kg) |                            |
| <b>Step 1</b>   |                              |                            |                          |                                          |                      |                             |                                         |                                |                            |
|                 | 83.859                       | 0.262                      | 0.839                    | 0.210                                    | 0.067                | 0.062                       | 0.081                                   | 3140                           | 0.204                      |

**Aquatic organisms: acceptability of risk (PEC/RAC < 1) for Glyphosate for each organism group based on FOCUS Steps 1, 2 and 3 calculations for the use of MON 52276 in pome/stone fruit (1 × 1440 g a.s./ha). Uses 4 a-c.**

| Group         |        | Fish acute                 | Fish prolonged           | Inverteb. acute                                 | Inverteb. prolonged  | Algae                       | Aquatic macrophytes           |        | Sed. dwell. prolonged      |
|---------------|--------|----------------------------|--------------------------|-------------------------------------------------|----------------------|-----------------------------|-------------------------------|--------|----------------------------|
| Test species  |        | <i>Lepomis macrochirus</i> | <i>Brachydanio rerio</i> | <i>Crassostrea gigas</i> / <i>Daphnia magna</i> | <i>Daphnia magna</i> | <i>Skeletonema costatum</i> | <i>Myriophyllum aquaticum</i> |        | <i>Chironomus riparius</i> |
| <b>Step 2</b> |        |                            |                          |                                                 |                      |                             |                               |        |                            |
| N-Europe      | 37.443 | 0.117                      | 0.374                    | 0.094                                           | 0.030                | 0.028                       | 0.036                         | 1590   | 0.103                      |
| S-Europe      | 30.501 | 0.095                      | 0.305                    | 0.076                                           | 0.024                | 0.023                       | 0.030                         | 1280   | 0.083                      |
| <b>Step 3</b> |        |                            |                          |                                                 |                      |                             |                               |        |                            |
| D3/ditch      | 3.806  | 0.012                      | 0.038                    | 0.010                                           | 0.003                | 0.003                       | 0.004                         | 5.080  | <0.001                     |
| D4/pond       | 0.240  | 0.001                      | 0.002                    | 0.001                                           | 0.000                | 0.000                       | 0.000                         | 4.241  | <0.001                     |
| D4/stream     | 3.364  | 0.011                      | 0.034                    | 0.008                                           | 0.003                | 0.002                       | 0.003                         | 0.425  | <0.001                     |
| D5/pond       | 0.240  | 0.001                      | 0.002                    | 0.001                                           | 0.000                | 0.000                       | 0.000                         | 4.162  | <0.001                     |
| D5/stream     | 3.716  | 0.012                      | 0.037                    | 0.009                                           | 0.003                | 0.003                       | 0.004                         | 1.087  | <0.001                     |
| R1/pond       | 0.250  | 0.001                      | 0.003                    | 0.001                                           | 0.000                | 0.000                       | 0.000                         | 5.742  | <0.001                     |
| R1/stream     | 2.629  | 0.008                      | 0.026                    | 0.007                                           | 0.002                | 0.002                       | 0.003                         | 5.566  | <0.001                     |
| R2/stream     | 3.530  | 0.011                      | 0.035                    | 0.009                                           | 0.003                | 0.003                       | 0.003                         | 54.590 | 0.004                      |
| R3/stream     | 3.714  | 0.012                      | 0.037                    | 0.009                                           | 0.003                | 0.003                       | 0.004                         | 61.020 | 0.004                      |
| R4/stream     | 2.981  | 0.009                      | 0.030                    | 0.007                                           | 0.002                | 0.002                       | 0.003                         | 26.700 | 0.002                      |

AF: Assessment factor; PEC: Predicted environmental concentration; RAC: Regulatory acceptable concentration; PEC/RAC ratios above the relevant trigger of 1 are shown in **bold**

**Aquatic organisms: acceptability of risk (PEC/RAC < 1) for Glyphosate for each organism group based on FOCUS Steps 1, 2 and 3 calculations for the use of MON 52276 in vines (1 × 1440 g a.s./ha). Uses 5 a-c.**

| Group           |                              | Fish acute                 | Fish prolonged           | Inverteb. acute                          | Inverteb. prolonged  | Algae                       | Aquatic macrophytes           |                                | Sed. dwell. prolonged      |
|-----------------|------------------------------|----------------------------|--------------------------|------------------------------------------|----------------------|-----------------------------|-------------------------------|--------------------------------|----------------------------|
| Test species    |                              | <i>Lepomis macrochirus</i> | <i>Brachydanio rerio</i> | <i>Crassostrea gigas / Daphnia magna</i> | <i>Daphnia magna</i> | <i>Skeletonema costatum</i> | <i>Myriophyllum aquaticum</i> |                                | <i>Chironomus riparius</i> |
| Endpoint (µg/L) |                              | LC <sub>50</sub><br>32000  | NOEC<br>1000             | EC <sub>50</sub><br>40000                | NOEC<br>12500        | ErC <sub>50</sub><br>13500  | ErC <sub>50</sub><br>10330    | Endpoint (µg/kg)               | NOEC<br>154000             |
| AF              |                              | 100                        | 10                       | 100                                      | 10                   | 10                          | 10                            | AF                             | 10                         |
| RAC (µg/L)      |                              | 320                        | 100                      | 400                                      | 1250                 | 1350                        | 1033                          | RAC (µg/kg)                    | 15400                      |
| FOCUS Scenario  | PEC <sub>sw,max</sub> (µg/L) |                            |                          |                                          |                      |                             |                               | PEC <sub>sed,max</sub> (µg/kg) |                            |
| <b>Step 1</b>   |                              |                            |                          |                                          |                      |                             |                               |                                |                            |
|                 | 83.859                       | 0.262                      | 0.839                    | 0.210                                    | 0.067                | 0.062                       | 0.081                         | 3140                           | 0.204                      |
| <b>Step 2</b>   |                              |                            |                          |                                          |                      |                             |                               |                                |                            |
| N-Europe        | 37.443                       | 0.117                      | 0.374                    | 0.094                                    | 0.030                | 0.028                       | 0.036                         | 1590                           | 0.103                      |
| S-Europe        | 30.501                       | 0.095                      | 0.305                    | 0.076                                    | 0.024                | 0.023                       | 0.030                         | 1280                           | 0.083                      |
| <b>Step 3</b>   |                              |                            |                          |                                          |                      |                             |                               |                                |                            |
| D6/ditch        | 3.822                        | 0.012                      | 0.038                    | 0.010                                    | 0.003                | 0.003                       | 0.004                         | 13.910                         | <0.001                     |
| R1/pond         | 0.250                        | 0.001                      | 0.003                    | 0.001                                    | 0.000                | 0.000                       | 0.000                         | 5.732                          | <0.001                     |
| R1/stream       | 2.629                        | 0.008                      | 0.026                    | 0.007                                    | 0.002                | 0.002                       | 0.003                         | 5.581                          | <0.001                     |
| R2/stream       | 3.530                        | 0.011                      | 0.035                    | 0.009                                    | 0.003                | 0.003                       | 0.003                         | 54.560                         | 0.004                      |
| R3/stream       | 3.714                        | 0.012                      | 0.037                    | 0.009                                    | 0.003                | 0.003                       | 0.004                         | 61.100                         | 0.004                      |
| R4/stream       | 3.505                        | 0.011                      | 0.035                    | 0.009                                    | 0.003                | 0.003                       | 0.003                         | 28.410                         | 0.002                      |

**Aquatic organisms: acceptability of risk (PEC/RAC < 1) for Glyphosate for each organism group based on FOCUS Steps 1, 2 and 3 calculations for the use of MON 52276 in vines (1 × 1440 g a.s./ha). Uses 5 a-c.**

| Group        |  | Fish acute                 | Fish prolonged           | Inverteb. acute                          | Inverteb. prolonged  | Algae                       | Aquatic macrophytes           |  | Sed. dwell. prolonged      |
|--------------|--|----------------------------|--------------------------|------------------------------------------|----------------------|-----------------------------|-------------------------------|--|----------------------------|
| Test species |  | <i>Lepomis macrochirus</i> | <i>Brachydanio rerio</i> | <i>Crassostrea gigas / Daphnia magna</i> | <i>Daphnia magna</i> | <i>Skeletonema costatum</i> | <i>Myriophyllum aquaticum</i> |  | <i>Chironomus riparius</i> |

AF: Assessment factor; PEC: Predicted environmental concentration; RAC: Regulatory acceptable concentration; PEC/RAC ratios above the relevant trigger of 1 are shown in **bold**

**Aquatic organisms: acceptability of risk (PEC/RAC < 1) for Glyphosate for each organism group based on FOCUS Steps 1, 2 and 3 calculations for the use of MON 52276 in olives (1 × 1440 g a.s./ha). Uses 4 a-c.**

| Group           |                              | Fish acute                 | Fish prolonged           | Inverteb. acute                          | Inverteb. prolonged  | Algae                       | Aquatic macrophytes           |                                | Sed. dwell. prolonged      |
|-----------------|------------------------------|----------------------------|--------------------------|------------------------------------------|----------------------|-----------------------------|-------------------------------|--------------------------------|----------------------------|
| Test species    |                              | <i>Lepomis macrochirus</i> | <i>Brachydanio rerio</i> | <i>Crassostrea gigas / Daphnia magna</i> | <i>Daphnia magna</i> | <i>Skeletonema costatum</i> | <i>Myriophyllum aquaticum</i> |                                | <i>Chironomus riparius</i> |
| Endpoint (µg/L) |                              | LC <sub>50</sub><br>32000  | NOEC<br>1000             | EC <sub>50</sub><br>40000                | NOEC<br>12500        | ErC <sub>50</sub><br>13500  | ErC <sub>50</sub><br>10330    | <b>Endpoint (µg/kg)</b>        | NOEC<br>154000             |
| AF              |                              | 100                        | 10                       | 100                                      | 10                   | 10                          | 10                            | <b>AF</b>                      | 10                         |
| RAC (µg/L)      |                              | 320                        | 100                      | 400                                      | 1250                 | 1350                        | 1033                          | <b>RAC (µg/kg)</b>             | 15400                      |
| FOCUS Scenario  | PEC <sub>sw,max</sub> (µg/L) |                            |                          |                                          |                      |                             |                               | PEC <sub>sed,max</sub> (µg/kg) |                            |
| <b>Step 1</b>   |                              |                            |                          |                                          |                      |                             |                               |                                |                            |
|                 | 83.859                       | 0.262                      | 0.839                    | 0.210                                    | 0.067                | 0.062                       | 0.081                         | 3140                           | 0.204                      |
| <b>Step 2</b>   |                              |                            |                          |                                          |                      |                             |                               |                                |                            |
| N-Europe        | 37.443                       | 0.117                      | 0.374                    | 0.094                                    | 0.030                | 0.028                       | 0.036                         | 1590                           | 0.103                      |

**Aquatic organisms: acceptability of risk (PEC/RAC < 1) for Glyphosate for each organism group based on FOCUS Steps 1, 2 and 3 calculations for the use of MON 52276 in olives (1 × 1440 g a.s./ha). Uses 4 a-c.**

| Group         |        | Fish acute                 | Fish prolonged           | Inverteb. acute                          | Inverteb. prolonged  | Algae                       | Aquatic macrophytes           |        | Sed. dwell. prolonged      |
|---------------|--------|----------------------------|--------------------------|------------------------------------------|----------------------|-----------------------------|-------------------------------|--------|----------------------------|
| Test species  |        | <i>Lepomis macrochirus</i> | <i>Brachydanio rerio</i> | <i>Crassostrea gigas / Daphnia magna</i> | <i>Daphnia magna</i> | <i>Skeletonema costatum</i> | <i>Myriophyllum aquaticum</i> |        | <i>Chironomus riparius</i> |
| S-Europe      | 30.501 | 0.095                      | 0.305                    | 0.076                                    | 0.024                | 0.023                       | 0.030                         | 1280   | 0.083                      |
| <b>Step 3</b> |        |                            |                          |                                          |                      |                             |                               |        |                            |
| D6/ditch      | 3.822  | 0.012                      | 0.038                    | 0.010                                    | 0.003                | 0.003                       | 0.004                         | 13.910 | <0.001                     |
| R4/stream     | 3.675  | 0.011                      | 0.037                    | 0.009                                    | 0.003                | 0.003                       | 0.004                         | 31.890 | 0.002                      |

AF: Assessment factor; PEC: Predicted environmental concentration; RAC: Regulatory acceptable concentration; PEC/RAC ratios above the relevant trigger of 1 are shown in **bold**

**Aquatic organisms: acceptability of risk (PEC/RAC < 1) for AMPA for each organism group based on FOCUS Steps 1, 2 and 3 calculations for the use of MON 52276 in field crops<sup>1</sup> (1 × 1440 g a.s./ha). Covers uses 1 a-c, 2 a-c, 6 a-b, 10 a-c.**

| Group                                            |                              | Fish acute                 | Fish prolonged             | Inverteb. acute            | Inverteb. prolonged  | Algae                                   | Aquatic macrophytes                     |                                | Sed. dwell. prolonged      |
|--------------------------------------------------|------------------------------|----------------------------|----------------------------|----------------------------|----------------------|-----------------------------------------|-----------------------------------------|--------------------------------|----------------------------|
| Test species                                     |                              | <i>Oncorhynchus mykiss</i> | <i>Pimephales promelas</i> | <i>Daphnia magna</i>       | <i>Daphnia magna</i> | <i>Pseudokirchneriella subcapitata</i>  | <i>Myriophyllum aquaticum</i>           |                                | <i>Chironomus riparius</i> |
| Endpoint (µg/L)                                  |                              | LC <sub>50</sub><br>100000 | NOEC<br>12000              | EC <sub>50</sub><br>690000 | NOEC<br>15000        | E <sub>r</sub> C <sub>50</sub><br>31900 | E <sub>r</sub> C <sub>50</sub><br>72000 | Endpoint (µg/kg)               | NOEC<br>786500             |
| AF                                               |                              | 100                        | 10                         | 100                        | 10                   | 10                                      | 10                                      | AF                             | 10                         |
| RAC (µg/L)                                       |                              | 1000                       | 1200                       | 6900                       | 1500                 | 3190                                    | 7200                                    | RAC (µg/kg)                    | 78650                      |
| FOCUS Scenario                                   | PEC <sub>sw,max</sub> (µg/L) |                            |                            |                            |                      |                                         |                                         | PEC <sub>sed,max</sub> (µg/kg) |                            |
| <b>Step 1 (DT<sub>50</sub> wat/sed = 89.9 d)</b> |                              |                            |                            |                            |                      |                                         |                                         |                                |                            |

**Aquatic organisms: acceptability of risk (PEC/RAC < 1) for AMPA for each organism group based on FOCUS Steps 1, 2 and 3 calculations for the use of MON 52276 in field crops<sup>1</sup> (1 × 1440 g a.s./ha). Covers uses 1 a-c, 2 a-c, 6 a-b, 10 a-c.**

| Group                                            |        | Fish acute                 | Fish prolonged             | Inverteb. acute      | Inverteb. prolonged  | Algae                                  | Aquatic macrophytes           |         | Sed. dwell. prolonged      |
|--------------------------------------------------|--------|----------------------------|----------------------------|----------------------|----------------------|----------------------------------------|-------------------------------|---------|----------------------------|
| Test species                                     |        | <i>Oncorhynchus mykiss</i> | <i>Pimephales promelas</i> | <i>Daphnia magna</i> | <i>Daphnia magna</i> | <i>Pseudokirchneriella subcapitata</i> | <i>Myriophyllum aquaticum</i> |         | <i>Chironomus riparius</i> |
|                                                  | 66.996 | 0.067                      | 0.056                      | 0.010                | 0.045                | 0.021                                  | 0.009                         | 1640    | 0.021                      |
| <b>Step 2 (DT<sub>50</sub> wat/sed = 89.9 d)</b> |        |                            |                            |                      |                      |                                        |                               |         |                            |
| N-Europe                                         | 32.804 | 0.033                      | 0.027                      | 0.005                | 0.022                | 0.010                                  | 0.005                         | 827.394 | 0.011                      |
| S-Europe                                         | 26.384 | 0.026                      | 0.022                      | 0.004                | 0.018                | 0.008                                  | 0.004                         | 664.272 | 0.008                      |

AF: Assessment factor; PEC: Predicted environmental concentration; RAC: Regulatory acceptable concentration; PEC/RAC ratios above the relevant trigger of 1 are shown in **bold**

<sup>1</sup> covering all corresponding uses in root vegetables, potatoes, bulb vegetables, fruiting vegetables, leafy vegetables and sugar beets

**Aquatic organisms: acceptability of risk (PEC/RAC < 1) for AMPA for each organism group based on FOCUS Steps 1, 2 and 3 calculations for the use of MON 52276 in orchards<sup>1</sup> (1 × 1440 g a.s./ha). Uses 4 a-c.**

| Group                                            |                              | Fish acute                 | Fish prolonged             | Inverteb. acute            | Inverteb. prolonged  | Algae                                   | Aquatic macrophytes                     |                                | Sed. dwell. prolonged      |
|--------------------------------------------------|------------------------------|----------------------------|----------------------------|----------------------------|----------------------|-----------------------------------------|-----------------------------------------|--------------------------------|----------------------------|
| Test species                                     |                              | <i>Oncorhynchus mykiss</i> | <i>Pimephales promelas</i> | <i>Daphnia magna</i>       | <i>Daphnia magna</i> | <i>Pseudokirchneriella subcapitata</i>  | <i>Myriophyllum aquaticum</i>           |                                | <i>Chironomus riparius</i> |
| Endpoint (µg/L)                                  |                              | LC <sub>50</sub><br>100000 | NOEC<br>12000              | EC <sub>50</sub><br>690000 | NOEC<br>15000        | E <sub>r</sub> C <sub>50</sub><br>31900 | E <sub>r</sub> C <sub>50</sub><br>72000 | Endpoint (µg/kg)               | NOEC<br>786500             |
| AF                                               |                              | 100                        | 10                         | 100                        | 10                   | 10                                      | 10                                      | AF                             | 10                         |
| RAC (µg/L)                                       |                              | 1000                       | 1200                       | 6900                       | 1500                 | 3190                                    | 7200                                    | RAC (µg/kg)                    | 78650                      |
| FOCUS Scenario                                   | PEC <sub>sw,max</sub> (µg/L) |                            |                            |                            |                      |                                         |                                         | PEC <sub>sed,max</sub> (µg/kg) |                            |
| <b>Step 1 (DT<sub>50</sub> wat/sed = 89.9 d)</b> |                              |                            |                            |                            |                      |                                         |                                         |                                |                            |



**Aquatic organisms: acceptability of risk (PEC/RAC < 1) for AMPA for each organism group based on FOCUS Steps 1, 2 and 3 calculations for the use of MON 52276 in orchards<sup>1</sup> (1 × 1440 g a.s./ha). Uses 4 a-c.**

| Group                                            |        | Fish acute                 | Fish prolonged             | Inverteb. acute      | Inverteb. prolonged  | Algae                                  | Aquatic macrophytes           |         | Sed. dwell. prolonged      |
|--------------------------------------------------|--------|----------------------------|----------------------------|----------------------|----------------------|----------------------------------------|-------------------------------|---------|----------------------------|
| Test species                                     |        | <i>Oncorhynchus mykiss</i> | <i>Pimephales promelas</i> | <i>Daphnia magna</i> | <i>Daphnia magna</i> | <i>Pseudokirchneriella subcapitata</i> | <i>Myriophyllum aquaticum</i> |         | <i>Chironomus riparius</i> |
|                                                  | 66.996 | 0.067                      | 0.056                      | 0.010                | 0.045                | 0.021                                  | 0.009                         | 1640    | 0.021                      |
| <b>Step 2 (DT<sub>50</sub> wat/sed = 89.9 d)</b> |        |                            |                            |                      |                      |                                        |                               |         |                            |
| N-Europe                                         | 32.804 | 0.033                      | 0.027                      | 0.005                | 0.022                | 0.010                                  | 0.005                         | 827.394 | 0.011                      |
| S-Europe                                         | 26.384 | 0.026                      | 0.022                      | 0.004                | 0.018                | 0.008                                  | 0.004                         | 664.272 | 0.008                      |

AF: Assessment factor; PEC: Predicted environmental concentration; RAC: Regulatory acceptable concentration; PEC/RAC ratios above the relevant trigger of 1 are shown in **bold**

<sup>1</sup> covering all corresponding uses in pome/stone fruit and olives

**Aquatic organisms: acceptability of risk (PEC/RAC < 1) for AMPA for each organism group based on FOCUS Steps 1, 2 and 3 calculations for the use of MON 52276 in vines (1 × 1440 g a.s./ha). Uses 5 a-c.**

| Group           |                              | Fish acute                 | Fish prolonged             | Inverteb. acute            | Inverteb. prolonged  | Algae                                   | Aquatic macrophytes                     |                                | Sed. dwell. prolonged      |
|-----------------|------------------------------|----------------------------|----------------------------|----------------------------|----------------------|-----------------------------------------|-----------------------------------------|--------------------------------|----------------------------|
| Test species    |                              | <i>Oncorhynchus mykiss</i> | <i>Pimephales promelas</i> | <i>Daphnia magna</i>       | <i>Daphnia magna</i> | <i>Pseudokirchneriella subcapitata</i>  | <i>Myriophyllum aquaticum</i>           |                                | <i>Chironomus riparius</i> |
| Endpoint (µg/L) |                              | LC <sub>50</sub><br>100000 | NOEC<br>12000              | EC <sub>50</sub><br>690000 | NOEC<br>15000        | E <sub>r</sub> C <sub>50</sub><br>31900 | E <sub>r</sub> C <sub>50</sub><br>72000 | <b>Endpoint (µg/kg)</b>        | NOEC<br>786500             |
| AF              |                              | 100                        | 10                         | 100                        | 10                   | 10                                      | 10                                      | <b>AF</b>                      | 10                         |
| RAC (µg/L)      |                              | 1000                       | 1200                       | 6900                       | 1500                 | 3190                                    | 7200                                    | <b>RAC (µg/kg)</b>             | 78650                      |
| FOCUS Scenario  | PEC <sub>sw,max</sub> (µg/L) |                            |                            |                            |                      |                                         |                                         | PEC <sub>sed,max</sub> (µg/kg) |                            |

**Aquatic organisms: acceptability of risk (PEC/RAC < 1) for AMPA for each organism group based on FOCUS Steps 1, 2 and 3 calculations for the use of MON 52276 in vines (1 × 1440 g a.s./ha). Uses 5 a-c.**

| Group                                            |        | Fish acute                 | Fish prolonged             | Inverteb. acute      | Inverteb. prolonged  | Algae                                  | Aquatic macrophytes           |         | Sed. dwell. prolonged      |
|--------------------------------------------------|--------|----------------------------|----------------------------|----------------------|----------------------|----------------------------------------|-------------------------------|---------|----------------------------|
| Test species                                     |        | <i>Oncorhynchus mykiss</i> | <i>Pimephales promelas</i> | <i>Daphnia magna</i> | <i>Daphnia magna</i> | <i>Pseudokirchneriella subcapitata</i> | <i>Myriophyllum aquaticum</i> |         | <i>Chironomus riparius</i> |
| <b>Step 1 (DT<sub>50</sub> wat/sed = 89.9 d)</b> |        |                            |                            |                      |                      |                                        |                               |         |                            |
|                                                  | 66.996 | 0.067                      | 0.056                      | 0.010                | 0.045                | 0.021                                  | 0.009                         | 1640    | 0.021                      |
| <b>Step 2 (DT<sub>50</sub> wat/sed = 89.9 d)</b> |        |                            |                            |                      |                      |                                        |                               |         |                            |
| N-Europe                                         | 32.804 | 0.033                      | 0.027                      | 0.005                | 0.022                | 0.010                                  | 0.005                         | 827.394 | 0.011                      |
| S-Europe                                         | 26.384 | 0.026                      | 0.022                      | 0.004                | 0.018                | 0.008                                  | 0.004                         | 664.272 | 0.008                      |

AF: Assessment factor; PEC: Predicted environmental concentration; RAC: Regulatory acceptable concentration; PEC/RAC ratios above the relevant trigger of 1 are shown in **bold**

**Aquatic organisms: acceptability of risk (PEC/RAC < 1) for HMPA for each organism group based on FOCUS Steps 1, 2 and 3 calculations for the use of MON 52276 in field crops<sup>1</sup> (1 × 1440 g a.s./ha). Covers uses 1 a-c, 2 a-c, 6 a-b, 10 a-c.**

| Group           |                              | Fish acute                | Inverteb. acute            | Algae                                    | Aquatic macrophytes                      |                                | Sed. dwell. prolonged                    |
|-----------------|------------------------------|---------------------------|----------------------------|------------------------------------------|------------------------------------------|--------------------------------|------------------------------------------|
| Test species    |                              | -                         | <i>Daphnia magna</i>       | <i>Pseudokirchneriella subcapitata</i>   | <i>Lemna gibba</i>                       |                                | <i>Chironomus riparius</i> <sup>\$</sup> |
| Endpoint (µg/L) |                              | LC <sub>50</sub><br>32000 | EC <sub>50</sub><br>100000 | E <sub>r</sub> C <sub>50</sub><br>120000 | E <sub>r</sub> C <sub>50</sub><br>123000 | Endpoint (µg/kg)               | NOEC<br>15400 µg/kg sed.                 |
| AF              |                              | 100                       | 100                        | 10                                       | 10                                       | AF                             | 10                                       |
| RAC (µg/L)      |                              | 320                       | 1000                       | 12000                                    | 12300                                    | RAC (µg/kg)                    | 1540 µg/kg sed.                          |
| FOCUS Scenario  | PEC <sub>sw,max</sub> (µg/L) |                           |                            |                                          |                                          | PEC <sub>sed,max</sub> (µg/kg) |                                          |
| <b>Step 1</b>   |                              |                           |                            |                                          |                                          |                                |                                          |

**Aquatic organisms: acceptability of risk (PEC/RAC < 1) for HMPA for each organism group based on FOCUS Steps 1, 2 and 3 calculations for the use of MON 52276 in field crops<sup>1</sup> (1 × 1440 g a.s./ha). Covers uses 1 a-c, 2 a-c, 6 a-b, 10 a-c.**

| Group         |        | Fish acute | Inverteb. acute      | Algae                                  | Aquatic macrophytes |        | Sed. dwell. prolonged                    |
|---------------|--------|------------|----------------------|----------------------------------------|---------------------|--------|------------------------------------------|
| Test species  |        | -          | <i>Daphnia magna</i> | <i>Pseudokirchneriella subcapitata</i> | <i>Lemna gibba</i>  |        | <i>Chironomus riparius</i> <sup>\$</sup> |
|               | 32.256 | 0.101      | 0.032                | 0.003                                  | 0.003               | 227.81 | 0.148                                    |
| <b>Step 2</b> |        |            |                      |                                        |                     |        |                                          |
| N-Europe      | 16.289 | 0.051      | 0.016                | 0.001                                  | 0.001               | 115.05 | 0.075                                    |
| S-Europe      | 13.205 | 0.041      | 0.013                | 0.001                                  | 0.001               | 93.26  | 0.061                                    |

AF: Assessment factor; PEC: Predicted environmental concentration; RAC: Regulatory acceptable concentration; PEC/RAC ratios above the relevant trigger of 1 are shown in **bold**

<sup>1</sup> covering all corresponding uses in root vegetables, potatoes, bulb vegetables, fruiting vegetables, leafy vegetables and sugar beets

<sup>\$</sup> added following open point of section 4 (expert consultation 4.2): “RMS to update the PEC sediment calculations for HMPA using a default Koc value of 10000 mL/g and to include the metabolite HMPA in the residue definition for sediment in both an update to the RAR and the list of endpoints.” As worst case the metabolite was considered 10 times more toxic than glyphosate.

**Aquatic organisms: acceptability of risk (PEC/RAC < 1) for HMPA for each organism group based on FOCUS Steps 1, 2 and 3 calculations for the use of MON 52276 in orchards<sup>1</sup> (1 × 1440 g a.s./ha). Uses 4 a-c.**

| Group           |  | Fish acute                | Inverteb. acute            | Algae                                    | Aquatic macrophytes                      |                  | Sed. dwell. prolonged                    |
|-----------------|--|---------------------------|----------------------------|------------------------------------------|------------------------------------------|------------------|------------------------------------------|
| Test species    |  | -                         | <i>Daphnia magna</i>       | <i>Pseudokirchneriella subcapitata</i>   | <i>Lemna gibba</i>                       |                  | <i>Chironomus riparius</i> <sup>\$</sup> |
| Endpoint (µg/L) |  | LC <sub>50</sub><br>32000 | EC <sub>50</sub><br>100000 | E <sub>r</sub> C <sub>50</sub><br>120000 | E <sub>r</sub> C <sub>50</sub><br>123000 | Endpoint (µg/kg) | NOEC<br>15400 µg/kg sed.                 |
| AF              |  | 100                       | 100                        | 10                                       | 10                                       | AF               | 10                                       |
| RAC (µg/L)      |  | 320                       | 1000                       | 12000                                    | 12300                                    | RAC (µg/kg)      | 1540 µg/kg sed.                          |

**Aquatic organisms: acceptability of risk (PEC/RAC < 1) for HMPA for each organism group based on FOCUS Steps 1, 2 and 3 calculations for the use of MON 52276 in orchards<sup>1</sup> (1 × 1440 g a.s./ha). Uses 4 a-c.**

| Group          |                              | Fish acute | Inverteb. acute      | Algae                                  | Aquatic macrophytes |                                | Sed. dwell. prolonged                    |
|----------------|------------------------------|------------|----------------------|----------------------------------------|---------------------|--------------------------------|------------------------------------------|
| Test species   |                              | -          | <i>Daphnia magna</i> | <i>Pseudokirchneriella subcapitata</i> | <i>Lemna gibba</i>  |                                | <i>Chironomus riparius</i> <sup>\$</sup> |
| FOCUS Scenario | PEC <sub>sw,max</sub> (µg/L) |            |                      |                                        |                     | PEC <sub>sed,max</sub> (µg/kg) |                                          |
| <b>Step 1</b>  |                              |            |                      |                                        |                     |                                |                                          |
|                | 32.256                       | 0.101      | 0.032                | 0.003                                  | 0.003               | 227.81                         | 0.148                                    |
| <b>Step 2</b>  |                              |            |                      |                                        |                     |                                |                                          |
| N-Europe       | 16.289                       | 0.051      | 0.016                | 0.001                                  | 0.001               | 115.05                         | 0.075                                    |
| S-Europe       | 13.205                       | 0.041      | 0.013                | 0.001                                  | 0.001               | 93.26                          | 0.061                                    |

AF: Assessment factor; PEC: Predicted environmental concentration; RAC: Regulatory acceptable concentration; PEC/RAC ratios above the relevant trigger of 1 are shown in **bold**

<sup>1</sup> covering all corresponding uses in pome/stone fruit and olives

<sup>\$</sup> added following open point of section 4 (expert consultation 4.2): “RMS to update the PEC sediment calculations for HMPA using a default Koc value of 10000 mL/g and to include the metabolite HMPA in the residue definition for sediment in both an update to the RAR and the list of endpoints.” As worst case the metabolite was considered 10 times more toxic than glyphosate.

**Aquatic organisms: acceptability of risk (PEC/RAC < 1) for HMPA for each organism group based on FOCUS Steps 1, 2 and 3 calculations for the use of MON 52276 in vines (1 × 1440 g a.s./ha). Uses 5 a-c.**

| Group           |  | Fish acute                | Inverteb. acute            | Algae                                    | Aquatic macrophytes                      |                  | Sed. dwell. prolonged                    |
|-----------------|--|---------------------------|----------------------------|------------------------------------------|------------------------------------------|------------------|------------------------------------------|
| Test species    |  | -                         | <i>Daphnia magna</i>       | <i>Pseudokirchneriella subcapitata</i>   | <i>Lemna gibba</i>                       |                  | <i>Chironomus riparius</i> <sup>\$</sup> |
| Endpoint (µg/L) |  | LC <sub>50</sub><br>32000 | EC <sub>50</sub><br>100000 | E <sub>r</sub> C <sub>50</sub><br>120000 | E <sub>r</sub> C <sub>50</sub><br>123000 | Endpoint (µg/kg) | NOEC<br>15400 µg/kg sed.                 |

**Aquatic organisms: acceptability of risk (PEC/RAC < 1) for HMPA for each organism group based on FOCUS Steps 1, 2 and 3 calculations for the use of MON 52276 in vines (1 × 1440 g a.s./ha). Uses 5 a-c.**

| Group          |                              | Fish acute | Inverteb. acute      | Algae                                  | Aquatic macrophytes |                                | Sed. dwell. prolonged                   |
|----------------|------------------------------|------------|----------------------|----------------------------------------|---------------------|--------------------------------|-----------------------------------------|
| Test species   |                              | -          | <i>Daphnia magna</i> | <i>Pseudokirchneriella subcapitata</i> | <i>Lemna gibba</i>  |                                | <i>Chironomus riparius</i> <sup>§</sup> |
| AF             |                              | 100        | 100                  | 10                                     | 10                  | <b>AF</b>                      | 10                                      |
| RAC (µg/L)     |                              | 320        | 1000                 | 12000                                  | 12300               | <b>RAC (µg/kg)</b>             | 1540 µg/kg sed.                         |
| FOCUS Scenario | PEC <sub>sw,max</sub> (µg/L) |            |                      |                                        |                     | PEC <sub>sed,max</sub> (µg/kg) |                                         |
| <b>Step 1</b>  |                              |            |                      |                                        |                     |                                |                                         |
|                | 32.256                       | 0.101      | 0.032                | 0.003                                  | 0.003               | 227.81                         | 0.148                                   |
| <b>Step 2</b>  |                              |            |                      |                                        |                     |                                |                                         |
| N-Europe       | 16.289                       | 0.051      | 0.016                | 0.001                                  | 0.001               | 115.05                         | 0.075                                   |
| S-Europe       | 13.205                       | 0.041      | 0.013                | 0.001                                  | 0.001               | 93.26                          | 0.061                                   |

AF: Assessment factor; PEC: Predicted environmental concentration; RAC: Regulatory acceptable concentration; PEC/RAC ratios above the relevant trigger of 1 are shown in **bold**

<sup>§</sup> added following open point of section 4 (expert consultation 4.2): “RMS to update the PEC sediment calculations for HMPA using a default Koc value of 10000 mL/g and to include the metabolite HMPA in the residue definition for sediment in both an update to the RAR and the list of endpoints.” As worst case the metabolite was considered 10 times more toxic than glyphosate.

**Aquatic organisms: acceptability of risk (PEC/RAC < 1) for P1a and M3.3 for sediment dwellers based on FOCUS Steps 1, 2 and 3 calculations for the use of MON 52276 in field crops<sup>1</sup> (1 × 1440 g a.s./ha). Covers uses 1 a-c, 2 a-c, 6 a-b, 10 a-c.**

| Group        |          | Sed. dwell. prolonged      |
|--------------|----------|----------------------------|
| Test species |          | <i>Chironomus riparius</i> |
| Endpoint     | Endpoint | NOEC*                      |

**Aquatic organisms: acceptability of risk (PEC/RAC < 1) for P1a and M3.3 for sediment dwellers based on FOCUS Steps 1, 2 and 3 calculations for the use of MON 52276 in field crops<sup>1</sup> (1 × 1440 g a.s./ha). Covers uses 1 a-c, 2 a-c, 6 a-b, 10 a-c.**

| Group          |                                | Sed. dwell. prolonged      |
|----------------|--------------------------------|----------------------------|
| Test species   |                                | <i>Chironomus riparius</i> |
| (µg/L)         | (µg/kg)                        | 78650                      |
| AF             | AF                             | 10                         |
| RAC (µg/L)     | RAC (µg/kg)                    | 7865                       |
| FOCUS Scenario | PEC <sub>sed,max</sub> (µg/kg) |                            |
| <b>Step 1</b>  |                                |                            |
|                | 366.051                        | 0.047                      |
| <b>Step 2</b>  |                                |                            |
| N-Europe       | 184.872                        | 0.024                      |
| S-Europe       | 149.857                        | 0.019                      |

AF: Assessment factor; PEC: Predicted environmental concentration; RAC: Regulatory acceptable concentration; PEC/RAC ratios above the relevant trigger of 1 are shown in **bold**

<sup>1</sup> covering all corresponding uses in root vegetables, potatoes, bulb vegetables, fruiting vegetables, leafy vegetables and sugar beets

\* considered ten times more toxic than AMPA

**Aquatic organisms: acceptability of risk (PEC/RAC < 1) for P1a and M3.3 for sediment dwellers based on FOCUS Steps 1, 2 and 3 calculations for the use of MON 52276 in orchards<sup>1</sup> (1 × 1440 g a.s./ha). Uses 4 a-c.**

| Group              |                     | Sed. dwell. prolonged      |
|--------------------|---------------------|----------------------------|
| Test species       |                     | <i>Chironomus riparius</i> |
| Endpoint<br>(µg/L) | Endpoint<br>(µg/kg) | NOEC*<br>78650             |
| AF                 | AF                  | 10                         |
| RAC (µg/L)         | RAC (µg/kg)         | 7865                       |

**Aquatic organisms: acceptability of risk (PEC/RAC < 1) for P1a and M3.3 for sediment dwellers based on FOCUS Steps 1, 2 and 3 calculations for the use of MON 52276 in orchards<sup>1</sup> (1 × 1440 g a.s./ha). Uses 4 a-c.**

| Group          |                                | Sed. dwell. prolonged      |
|----------------|--------------------------------|----------------------------|
| Test species   |                                | <i>Chironomus riparius</i> |
| FOCUS Scenario | PEC <sub>sed,max</sub> (µg/kg) |                            |
| <b>Step 1</b>  |                                |                            |
|                | 366.051                        | 0.047                      |
| <b>Step 2</b>  |                                |                            |
| N-Europe       | 184.872                        | 0.024                      |
| S-Europe       | 149.857                        | 0.019                      |

AF: Assessment factor; PEC: Predicted environmental concentration; RAC: Regulatory acceptable concentration; PEC/RAC ratios above the relevant trigger of 1 are shown in **bold**

<sup>1</sup> covering all corresponding uses in pome/stone fruit and olives

\* considered ten times more toxic than AMPA

**Aquatic organisms: acceptability of risk (PEC/RAC < 1) for P1a and M3.3 for sediment dwellers based on FOCUS Steps 1, 2 and 3 calculations for the use of MON 52276 in vines (1 × 1440 g a.s./ha). Uses 5 a-c.**

| Group           |                                | Sed. dwell. prolonged      |
|-----------------|--------------------------------|----------------------------|
| Test species    |                                | <i>Chironomus riparius</i> |
| Endpoint (µg/L) | Endpoint (µg/kg)               | NOEC*                      |
|                 |                                | 78650                      |
| AF              | AF                             | 10                         |
| RAC (µg/L)      | RAC (µg/kg)                    | 7865                       |
| FOCUS Scenario  | PEC <sub>sed,max</sub> (µg/kg) |                            |
| <b>Step 1</b>   |                                |                            |
|                 | 366.051                        | 0.047                      |

**Aquatic organisms: acceptability of risk (PEC/RAC < 1) for P1a and M3.3 for sediment dwellers based on FOCUS Steps 1, 2 and 3 calculations for the use of MON 52276 in vines (1 × 1440 g a.s./ha). Uses 5 a-c.**

|                     |         |                              |
|---------------------|---------|------------------------------|
| <b>Group</b>        |         | <b>Sed. dwell. prolonged</b> |
| <b>Test species</b> |         | <i>Chironomus riparius</i>   |
| <b>Step 2</b>       |         |                              |
| N-Europe            | 184.872 | 0.024                        |
| S-Europe            | 149.857 | 0.019                        |

AF: Assessment factor; PEC: Predicted environmental concentration; RAC: Regulatory acceptable concentration; PEC/RAC ratios above the relevant trigger of 1 are shown in **bold**

\* considered ten times more toxic than AMPA

**PEC/RACs for glyphosate – railways at 1 x 3600 g a.s./ha (covers uses 7a-7b)**

|                      | <b>fish acute</b>            | <b>fish chronic</b>      | <b>Aquatic invertebrates</b>             | <b>Aquatic invertebrates prolonged</b> | <b>Algae</b>                | <b>Higher plant</b>           |                                      | <b>Sed. dwell. prolonged</b> |
|----------------------|------------------------------|--------------------------|------------------------------------------|----------------------------------------|-----------------------------|-------------------------------|--------------------------------------|------------------------------|
|                      | <i>Lepomis macrochirus</i>   | <i>Brachydanio rerio</i> | <i>Crassostrea gigas / Daphnia magna</i> | <i>Daphnia magna</i>                   | <i>Skeletonema costatum</i> | <i>Myriophyllum aquaticum</i> |                                      | <i>Chironomus riparius</i>   |
|                      | LC <sub>50</sub>             | NOEC                     | EC <sub>50</sub>                         | NOEC                                   | IC <sub>50</sub>            | ErC <sub>50</sub>             |                                      | NOEC                         |
|                      | 32000 µg/L                   | 1000 µg/L                | 40000 µg/L                               | 12500 µg/L                             | 13500 µg/L                  | 10330 µg/L                    |                                      | 154000                       |
| <b>AF</b>            | 100                          | 10                       | 100                                      | 10                                     | 10                          | 10                            | <b>AF</b>                            | 10                           |
| <b>RAC (µg/L)</b>    | 320                          | 100                      | 400                                      | 1250                                   | 1350                        | 1033                          | <b>RAC (µg/kg)</b>                   | 15400                        |
| <b>Scenario</b>      | <b>PEC global max (µg L)</b> |                          |                                          |                                        |                             |                               | <b>PEC<sub>sed,max</sub> (µg/kg)</b> |                              |
| <b>Railway ditch</b> | 9.458                        | 0.03                     | 0.09                                     | 0.02                                   | 0.01                        | 0.01                          | 0.01                                 | 34.781                       |
|                      |                              |                          |                                          |                                        |                             |                               |                                      | 0.002                        |

AF: Assessment factor; PEC: Predicted environmental concentration; RAC: Regulatory acceptable concentration; PEC/RAC ratios above the relevant trigger of 1 are shown in **bold**



**PEC/RACs for AMPA – railways at 1 x 3600 g a.s./ha (covers uses 7a-7b)**

|                      | fish acute                   | fish chronic               | Aquatic invertebrates | Aquatic invertebrates prolonged | Algae                                  | Higher plant                  | Sed. dwell. prolonged                |
|----------------------|------------------------------|----------------------------|-----------------------|---------------------------------|----------------------------------------|-------------------------------|--------------------------------------|
|                      | <i>Oncorhynchus mykiss</i>   | <i>Pimephales promelas</i> | <i>Daphnia magna</i>  | <i>Daphnia magna</i>            | <i>Pseudokirchneriella subcapitata</i> | <i>Myriophyllum aquaticum</i> | <i>Chironomus riparius</i>           |
|                      | LC <sub>50</sub>             | NOEC                       | EC <sub>50</sub>      | NOEC                            | ErC <sub>50</sub>                      | ErC <sub>50</sub>             | NOEC                                 |
|                      | 100000 µg/L                  | 12000 µg/L                 | 100000 µg/L           | 15000 µg/L                      | 191000 31900 µg/L                      | 72000 µg/L                    | 786500                               |
| <b>AF</b>            | 100                          | 10                         | 100                   | 10                              | 10                                     | 10                            | <b>AF</b> 10                         |
| <b>RAC (µg/L)</b>    | 1000                         | 1200                       | 1000 6900             | 1500                            | 19100 3190                             | 7200                          | <b>RAC (µg/kg)</b> 78650             |
| <b>Scenario</b>      | <b>PEC global max (µg L)</b> |                            |                       |                                 |                                        |                               | <b>PEC<sub>sed,max</sub> (µg/kg)</b> |
| <b>Railway ditch</b> | 6.210                        | 0.01                       | 0.01                  | 0.006 0.001                     | 0.004                                  | 0.0003 0.002                  | 0.001 19.469 0.000                   |

AF: Assessment factor; PEC: Predicted environmental concentration; RAC: Regulatory acceptable concentration; PEC/RAC ratios above the relevant trigger of 1 are shown in **bold**

**PEC/RACs for HMPA – railways at 1 x 3600 g a.s./ha (covers uses 7a-7b)**

|                      | Fish*                        | Aquatic invertebrates | Algae                                  | Higher plant       |                                      | Sed. dwell. prolonged        |
|----------------------|------------------------------|-----------------------|----------------------------------------|--------------------|--------------------------------------|------------------------------|
|                      | -                            | <i>Daphnia magna</i>  | <i>Pseudokirchneriella subcapitata</i> | <i>Lemna gibba</i> |                                      | <i>Chironomus riparius</i> § |
|                      | LC <sub>50</sub>             | EC <sub>50</sub>      | ErC <sub>50</sub>                      | EC <sub>50</sub>   | <b>Endpoint</b>                      | NOEC                         |
|                      | 32000                        | > 100000 µg/L         | > 120000 µg/L                          | > 123000 µg/L      | <b>(µg/kg)</b>                       | 15400 µg/kg sed.             |
| <b>AF</b>            | 100                          | 100                   | 10                                     | 10                 | <b>AF</b>                            | 10                           |
| <b>RAC (µg/L)</b>    | 320                          | > 1000                | > 12000                                | > 12300            | <b>RAC (µg/kg)</b>                   | 1540 µg/kg sed.              |
| <b>Scenario</b>      | <b>PEC global max (µg/L)</b> |                       |                                        |                    | <b>PEC<sub>sed,max</sub> (µg/kg)</b> |                              |
| <b>Railway ditch</b> | 0.627                        | 0.002                 | < 0.001                                | < 0.0001           | < 0.0001                             | 2.304                        |

AF: Assessment factor; PEC: Predicted environmental concentration; RAC: Regulatory acceptable concentration; PEC/RAC ratios above the relevant trigger of 1 are shown in **bold**

\* considered not more toxic than the active substance

§ added following open point of section 4 (expert consultation 4.2): “RMS to update the PEC sediment calculations for HMPA using a default Koc value of 10000 mL/g and to include the metabolite HMPA in the residue definition for sediment in both an update to the RAR and the list of endpoints.” As worst case the metabolite was considered 10 times more toxic than glyphosate.

**PEC/RACs for P1a and M3.3 – railways at 1 x 3600 g a.s./ha (covers uses 7a-7b)**

|                      |                                      | Sed. dwell. prolonged      |
|----------------------|--------------------------------------|----------------------------|
|                      |                                      | <i>Chironomus riparius</i> |
|                      |                                      | NOEC                       |
|                      |                                      | 78650*                     |
| <b>AF</b>            |                                      | 10                         |
| <b>RAC (µg/L)</b>    |                                      | 7865                       |
| <b>Scenario</b>      | <b>PEC<sub>sed,max</sub> (µg/kg)</b> |                            |
| <b>Railway ditch</b> | 5.008                                | 0.001                      |

AF: Assessment factor; PEC: Predicted environmental concentration; RAC: Regulatory acceptable concentration; PEC/RAC ratios above the relevant trigger of 1 are shown in **bold**

\* considered ten times more toxic than the parent metabolite AMPA

**Effects on bees (Regulation (EU) N° 283/2013, Annex Part A, point 8.3.1 and Regulation (EU) N° 284/2013 Annex Part A, point 10.3.1)\***

\* This section does reflect the EFSA Guidance Document on bees (EFSA, 2013) which has not yet been noted by the Standing Committee on Plants, Animals, Food and Feed.

| Species                  | Test substance                             | Time scale/type of endpoint | End point                            | Toxicity                                                                         |
|--------------------------|--------------------------------------------|-----------------------------|--------------------------------------|----------------------------------------------------------------------------------|
| <i>Apis mellifera L.</i> | Glyphosate K-salt                          | Acute                       | Oral toxicity (LD <sub>50</sub> )    | >104 µg a.e./bee                                                                 |
| <i>Apis mellifera L.</i> | Glyphosate acid                            | Acute                       | Oral toxicity (LD <sub>50</sub> )    | >182 µg a.e./bee                                                                 |
| <i>Apis mellifera L.</i> | Glyphosate                                 | Acute                       | Oral toxicity (LD <sub>50</sub> )    | >40 µg a.e./bee                                                                  |
| <i>Apis mellifera L.</i> | Glyphosate acid                            | Acute                       | Oral toxicity (LD <sub>50</sub> )    | >200 µg a.e./bee                                                                 |
| <i>Apis mellifera L.</i> | Glyphosate                                 | Acute                       | Oral toxicity (LD <sub>50</sub> )    | >116.67 µg a.e./bee                                                              |
| <i>Apis mellifera L.</i> | MON 52276                                  | Acute                       | Oral toxicity (LD <sub>50</sub> )    | >77 µg a.s. a.e./bee                                                             |
| <i>Bombus terrestris</i> | Glyphosate-isopropylammonium (in MON 0139) | Acute                       | Oral toxicity (LD <sub>50</sub> )    | >412 µg a.e./bee                                                                 |
| <i>Apis mellifera L.</i> | Glyphosate K-salt                          | Acute                       | Contact toxicity (LD <sub>50</sub> ) | >100 µg a.e./bee                                                                 |
| <i>Apis mellifera L.</i> | a.s.,                                      | Acute                       | Contact toxicity (LD <sub>50</sub> ) | >103 µg a.e./bee                                                                 |
| <i>Apis mellifera L.</i> | Glyphosate acid                            | Acute                       | Contact toxicity (LD <sub>50</sub> ) | >200 µg a.e./bee                                                                 |
| <i>Apis mellifera L.</i> | Glyphosate                                 | Acute                       | Contact toxicity (LD <sub>50</sub> ) | >100 µg a.e./bee                                                                 |
| <i>Bombus terrestris</i> | Glyphosate-isopropylammonium               | Acute                       | Contact toxicity (LD <sub>50</sub> ) | >461 µg a.e./bee                                                                 |
| <i>Osmia bicornis</i>    | Glyphosate-isopropylammonium               | Acute                       | Contact toxicity (LD <sub>50</sub> ) | >461 µg a.e./bee                                                                 |
| <i>Apis mellifera L.</i> | MON 52276                                  | Acute                       | Contact toxicity (LD <sub>50</sub> ) | >100 µg a.e./bee                                                                 |
| <i>Apis mellifera L.</i> | Glyphosate-isopropylammonium (in MON 0139) | Adult Chronic               | 10 d-LDD <sub>50</sub><br>10 d-NOEDD | >179.9 µg a.e./bee/day<br>179.9 µg a.e./bee/day                                  |
| <i>Apis mellifera L.</i> | Glyphosate-isopropylammonium (in MON 0139) | Bee brood development       | 22 d-ED <sub>10</sub><br>22 d-NOED   | 75.6 µg a.e./larva/developmental period<br>80 µg a.e./larva/developmental period |

**Literature data on bees**

| Species                            | Test substance | Time scale/type of endpoint                                 | Effects                                                      |
|------------------------------------|----------------|-------------------------------------------------------------|--------------------------------------------------------------|
| <i>Apis mellifera</i> <sup>#</sup> | glyphosate     | Chronic oral, 7 days (from day 3 to day 10 after emergence) | no effect on survival of bees at 0.01 or 0.1 µg glyphosate/L |

# Literature data eligible for risk assessment

|                                                                                                                                                                                                                                                                                                                                                                                                                                                                                                                                                                                                                                                                                                                                  |
|----------------------------------------------------------------------------------------------------------------------------------------------------------------------------------------------------------------------------------------------------------------------------------------------------------------------------------------------------------------------------------------------------------------------------------------------------------------------------------------------------------------------------------------------------------------------------------------------------------------------------------------------------------------------------------------------------------------------------------|
| Potential for accumulative toxicity: not studied                                                                                                                                                                                                                                                                                                                                                                                                                                                                                                                                                                                                                                                                                 |
| <p>Semi-field test (cage and tunnel test)</p> <p>Residues in honey bee colony after application at 8 L product/ha (2.88 kg a.e./ha) during flowering of <i>phacelia</i> and in the presence of foraging bees in semi-field conditions:</p> <ul style="list-style-type: none"> <li>- nectar samples from forager bees ranged from 2.78 to 31.3 mg a.e./kg</li> <li>- pollen samples from the pollen trap ranged from 87.2 to 629 mg a.e./kg</li> </ul> <p>Estimated total daily intake of glyphosate residues (via nectar + pollen) of the colony:</p> <ul style="list-style-type: none"> <li>- 269.3 mg a.e. (based on day 1 maximum mean residues),</li> <li>- 141.8 mg a.e. (based on mean residues over days 1-3).</li> </ul> |
| <p>Field tests</p> <p>A bee brood feeding test (<i>Apis mellifera</i>) with Glyphosate-isopropylammonium (in MON 0139) concluded a NOAEL of 301 mg a.e./L based on the nominal test concentration or 266 mg a.e./kg based on the measured concentration.</p>                                                                                                                                                                                                                                                                                                                                                                                                                                                                     |

**Risk assessment** for all representative uses at 1800 g a.s./ha

| Species                            | Test substance | Risk quotient          | HQ/ETR           | Trigger |
|------------------------------------|----------------|------------------------|------------------|---------|
| Based on European Commission, 2002 |                |                        |                  |         |
| <i>Apis mellifera L.</i>           | a.s.           | HQcontact              | < 18             | 50      |
| <i>Apis mellifera L.</i>           | a.s.           | HQoral                 | < 23.4           | 50      |
| Based on EFSA, 2013 screening      |                |                        |                  |         |
| <i>Apis mellifera L.</i>           | a.s.           | HQ acute adult contact | <18              | 42      |
| <i>Apis mellifera L.</i>           | a.s.           | ETR acute adult oral   | <0.18            | 0.2     |
| <i>Apis mellifera L.</i>           | a.s.           | ETRchronic adult oral  | <b>&lt;0.076</b> | 0.03    |
| <i>Apis mellifera L.</i>           | a.s.           | ETRlarvae*             | 0.1              | 0.2     |
| <i>Bombus terrestris</i>           | a.s.           | HQcontact              | <3.9             | 7       |
| <i>Bombus terrestris</i>           | a.s.           | ETRoral                | <b>&lt;0.05</b>  | 0.036   |
| <i>Osmia bicornis</i>              | a.s.           | HQcontact              | <3.9             | 8       |

\*considering ED<sub>10</sub> of 75.6 µg a.e./larva/developmental period

### First Tier risk assessment for adult chronic oral exposure

#### First-tier assessment (oral exposure) of the risk for honey bees due to the use of MON 52276 in orchard crops and vines at 1440 g a.e./ha

| <b>Intended use</b>         |                                           | Orchard crops, vines (Uses: 4a, 5a) |          |                |      |       |         |
|-----------------------------|-------------------------------------------|-------------------------------------|----------|----------------|------|-------|---------|
| <b>Application method</b>   |                                           | downward spraying                   |          |                |      |       |         |
| <b>Crop Category</b>        |                                           | under crop application <sup>1</sup> |          |                |      |       |         |
| <b>Active substance</b>     |                                           | Glyphosate                          |          |                |      |       |         |
| <b>Use pattern</b>          |                                           | 1-2 x 1440 g a.e./ha <sup>2</sup>   |          |                |      |       |         |
| Test design                 | Endpoint (lab.)                           | Scenario                            | BBCH     | E <sub>f</sub> | SV   | ETR   | Trigger |
| Adult chronic oral toxicity | LDD <sub>50</sub> > 179.9 µg a.e./bee/day | Weeds                               | weed <10 | 1              | 0.27 | <0.01 | 0.03    |
|                             |                                           |                                     | weed ≥10 | 1              | 2.9  | <0.02 |         |
|                             |                                           | field margin                        | weed <10 | 0.0092         | 2.9  | <0.01 |         |
|                             |                                           |                                     | weed ≥10 | 0.0092         | 2.9  | <0.01 |         |
|                             |                                           | adjacent crop                       | weed <10 | 0.0033         | 5.8  | <0.01 |         |
|                             |                                           |                                     | weed ≥10 | 0.0033         | 5.8  | <0.01 |         |
|                             |                                           | next crop                           | weed <10 | 1              | 0.54 | <0.01 |         |
|                             |                                           |                                     | weed ≥10 | 1              | 0.54 | <0.01 |         |

E<sub>f</sub>: exposure factor; SV: shortcut value; ETR: exposure toxicity ratio.

<sup>1</sup> Crop category chosen according to the recommendations of the EFSA GD on the Risk Assessment on Bees (2013) and the EFSA Screening Step and 1<sup>st</sup> Tier Calculator

<sup>2</sup> Max. single application rate of 1440 g a.e./ha considered for risk calculation

**First-tier assessment (oral exposure) of the risk for honey bees due to the use of MON 52276 in orchard crops and vines at 1080 g a.e./ha**

| <b>Intended use</b>         |                                           | Orchard crops, vines (Uses: 4a, 4b, 5a, 5b) |          |                |      |        |         |
|-----------------------------|-------------------------------------------|---------------------------------------------|----------|----------------|------|--------|---------|
| <b>Application method</b>   |                                           | downward spraying                           |          |                |      |        |         |
| <b>Crop category</b>        |                                           | under crop application <sup>1</sup>         |          |                |      |        |         |
| <b>Active substance</b>     |                                           | Glyphosate                                  |          |                |      |        |         |
| <b>Use pattern</b>          |                                           | 1-3 x 1080 g a.e./ha <sup>2</sup>           |          |                |      |        |         |
| Test design                 | Endpoint (lab.)                           | Scenario                                    | BBCH     | E <sub>f</sub> | SV   | ETR    | Trigger |
| Adult chronic oral toxicity | LDD <sub>50</sub> > 179.9 µg a.e./bee/day | Weeds                                       | weed <10 | 1              | 0.27 | <0.001 | 0.03    |
|                             |                                           |                                             | weed ≥10 | 1              | 2.9  | <0.013 |         |
|                             |                                           | field margin                                | weed <10 | 0.0092         | 2.9  | <0.001 |         |
|                             |                                           |                                             | weed ≥10 | 0.0092         | 2.9  | <0.001 |         |
|                             |                                           | adjacent crop                               | weed <10 | 0.0033         | 5.8  | <0.001 |         |
|                             |                                           |                                             | weed ≥10 | 0.0033         | 5.8  | <0.001 |         |
|                             |                                           | next crop                                   | weed <10 | 1              | 0.54 | <0.002 |         |
|                             |                                           |                                             | weed ≥10 | 1              | 0.54 | <0.002 |         |

E<sub>f</sub>: exposure factor; SV: shortcut value; ETR: exposure toxicity ratio.

<sup>1</sup> Crop category chosen according to the recommendations of the EFSA GD on the Risk Assessment on Bees (2013) and the EFSA Screening Step and 1<sup>st</sup> Tier Calculator

<sup>2</sup> Max. single application rate of 1080 g a.e./ha considered for risk calculation

**First-tier assessment (oral exposure) of the risk for honey bees due to the use of MON 52276 in orchard crops and vines at 720 g a.e./ha**

| <b>Intended use</b>         |                                           | Orchard crops, vines (Uses: 4b, 4c, 5b, 5c) |          |                |      |        |         |
|-----------------------------|-------------------------------------------|---------------------------------------------|----------|----------------|------|--------|---------|
| <b>Application method</b>   |                                           | downward spraying                           |          |                |      |        |         |
| <b>Crop Category</b>        |                                           | under crop application <sup>1</sup>         |          |                |      |        |         |
| <b>Active substance</b>     |                                           | Glyphosate                                  |          |                |      |        |         |
| <b>Use pattern</b>          |                                           | 1-3 x 720 g a.e./ha <sup>2</sup>            |          |                |      |        |         |
| Test design                 | Endpoint (lab.)                           | Scenario                                    | BBCH     | E <sub>f</sub> | SV   | ETR    | Trigger |
| Adult chronic oral toxicity | LDD <sub>50</sub> > 179.9 µg a.e./bee/day | Weeds                                       | weed <10 | 1              | 0.27 | <0.001 | 0.03    |
|                             |                                           |                                             | weed ≥10 | 1              | 2.9  | <0.008 |         |
|                             |                                           | field margin                                | weed <10 | 0.0092         | 2.9  | <0.001 |         |
|                             |                                           |                                             | weed ≥10 | 0.0092         | 2.9  | <0.001 |         |
|                             |                                           | adjacent crop                               | weed <10 | 0.0033         | 5.8  | <0.001 |         |
|                             |                                           |                                             | weed ≥10 | 0.0033         | 5.8  | <0.001 |         |
|                             |                                           | next crop                                   | weed <10 | 1              | 0.54 | <0.002 |         |
|                             |                                           |                                             | weed ≥10 | 1              | 0.54 | <0.002 |         |

E<sub>f</sub>: exposure factor; SV: shortcut value; ETR: exposure toxicity ratio.

<sup>1</sup> Crop category chosen according to the recommendations of the EFSA GD on the Risk Assessment on Bees (2013) and the EFSA Screening Step and 1<sup>st</sup> Tier Calculator

<sup>2</sup> Max. single application rate of 720 g a.e./ha considered for risk calculation

**First-tier assessment (oral exposure) of the risk for honey bees due to the use of MON 52276 – railway tracks at 1800 g a.e./ha**

| <b>Intended use</b>         |                                           | Railway tracks (Uses: 7a, 7b)       |          |                |      |        |         |
|-----------------------------|-------------------------------------------|-------------------------------------|----------|----------------|------|--------|---------|
| <b>Application method</b>   |                                           | downward spraying                   |          |                |      |        |         |
| <b>Crop Category</b>        |                                           | under crop application <sup>1</sup> |          |                |      |        |         |
| <b>Active substance</b>     |                                           | Glyphosate                          |          |                |      |        |         |
| <b>Use pattern</b>          |                                           | 1-2 x 1800 g a.e./ha <sup>2</sup>   |          |                |      |        |         |
| Test design                 | Endpoint (lab.)                           | Scenario                            | BBCH     | E <sub>f</sub> | SV   | ETR    | Trigger |
| Adult chronic oral toxicity | LDD <sub>50</sub> > 179.9 µg a.e./bee/day | Weeds                               | weed <10 | 1              | 0.27 | <0.002 | 0.03    |
|                             |                                           |                                     | weed ≥10 | 1              | 2.9  | <0.021 |         |
|                             |                                           | field margin                        | weed <10 | 0.0092         | 2.9  | <0.001 |         |
|                             |                                           |                                     | weed ≥10 | 0.0092         | 2.9  | <0.001 |         |
|                             |                                           | adjacent crop                       | weed <10 | 0.0033         | 5.8  | <0.001 |         |
|                             |                                           |                                     | weed ≥10 | 0.0033         | 5.8  | <0.001 |         |
|                             |                                           | next crop                           | weed <10 | 1              | 0.54 | <0.004 |         |
|                             |                                           |                                     | weed ≥10 | 1              | 0.54 | <0.004 |         |

E<sub>f</sub>: exposure factor; SV: shortcut value; ETR: exposure toxicity ratio.

<sup>1</sup> As no definite scenario for railway tracks is provided by the EFSA GD on the Risk Assessment on Bees (2013) and the EFSA Screening Step and 1<sup>st</sup> Tier Calculator, the under crop application scenario was considered to address uses on railway tracks

<sup>2</sup> Max. single application rate of 1800 g a.e./ha considered for risk calculation

**First-tier assessment (oral exposure) of the risk for honey bees due to the use of MON 52276 – invasive plant species in agricultural and non-agricultural areas at 1800 g a.e./ha**

| <b>Intended use</b>         |                                           | invasive plant species in agricultural and non-agricultural areas (Uses: 8, 9) |          |                |      |        |         |
|-----------------------------|-------------------------------------------|--------------------------------------------------------------------------------|----------|----------------|------|--------|---------|
| <b>Application method</b>   |                                           | downward spraying                                                              |          |                |      |        |         |
| <b>Crop Category</b>        |                                           | under crop application <sup>1</sup>                                            |          |                |      |        |         |
| <b>Active substance</b>     |                                           | Glyphosate                                                                     |          |                |      |        |         |
| <b>Use pattern</b>          |                                           | 1 x 1800 g a.e./ha                                                             |          |                |      |        |         |
| Test design                 | Endpoint (lab.)                           | Scenario                                                                       | BBCH     | E <sub>f</sub> | SV   | ETR    | Trigger |
| Adult chronic oral toxicity | LDD <sub>50</sub> > 179.9 µg a.e./bee/day | Weeds                                                                          | weed <10 | 1              | 0.27 | <0.002 | 0.03    |
|                             |                                           |                                                                                | weed >10 | 1              | 2.9  | <0.021 |         |
|                             |                                           | field margin                                                                   | weed <10 | 0.0092         | 2.9  | <0.001 |         |
|                             |                                           |                                                                                | weed >10 | 0.0092         | 2.9  | <0.001 |         |
|                             |                                           | adjacent crop                                                                  | weed <10 | 0.0033         | 5.8  | <0.001 |         |
|                             |                                           |                                                                                | weed >10 | 0.0033         | 5.8  | <0.001 |         |
|                             |                                           | next crop                                                                      | weed <10 | 1              | 0.54 | <0.004 |         |
|                             |                                           |                                                                                | weed >10 | 1              | 0.54 | <0.004 |         |

E<sub>f</sub>: exposure factor; SV: shortcut value; ETR: exposure toxicity ratio.

<sup>1</sup> As no definite scenario for invasive weeds is provided by the EFSA GD on the Risk Assessment on Bees (2013) and the EFSA Screening Step and 1<sup>st</sup> Tier Calculator, under crop application: giant hogweed (*Heracleum* spp.) and Japanese knotweed (*Reynoutria japonica*)

**First-tier assessment (oral exposure) of the risk for honey bees due to the use of MON 52276 – pre-sowing, pre-planting and post-harvest uses at 1440 g a.e./ha**

| <b>Intended use</b>         | Root & tuber vegetables, Bulb vegetables, Fruiting vegetables, Brassica, Leafy vegetables, Stem vegetables, Sugar beet (Uses: 1a, 2a) |               |      |                |      |        |         |
|-----------------------------|---------------------------------------------------------------------------------------------------------------------------------------|---------------|------|----------------|------|--------|---------|
| <b>Application method</b>   | downward spraying                                                                                                                     |               |      |                |      |        |         |
| <b>Crop category</b>        | bare soil application – crop attractive for pollen and nectar <sup>1</sup>                                                            |               |      |                |      |        |         |
| <b>Active substance</b>     | Glyphosate                                                                                                                            |               |      |                |      |        |         |
| <b>Use pattern</b>          | 1-2 x 1440 g a.e./ha <sup>2</sup>                                                                                                     |               |      |                |      |        |         |
| Test design                 | Endpoint (lab.)                                                                                                                       | Scenario      | BBCH | E <sub>f</sub> | SV   | ETR    | Trigger |
| Adult chronic oral toxicity | LDD <sub>50</sub> > 179.9 µg a.e./bee/day                                                                                             | treated crop  | <10  | 1              | 0.54 | <0.003 | 0.03    |
|                             |                                                                                                                                       | Weeds         | <10  | 1              | 0.27 | <0.002 |         |
|                             |                                                                                                                                       | field margin  | <10  | 0.0092         | 2.9  | <0.001 |         |
|                             |                                                                                                                                       | adjacent crop | <10  | 0.0033         | 5.8  | <0.001 |         |
|                             |                                                                                                                                       | next crop     | <10  | 1              | 0.54 | <0.003 |         |

Ef: exposure factor; SV: shortcut value; ETR: exposure toxicity ratio.

<sup>1</sup> Crop category chosen according to the recommendations of the EFSA GD on the Risk Assessment on Bees (2013) and the EFSA Screening Step and 1<sup>st</sup> Tier Calculator (technical note: for post-harvest uses, bare soil was selected however the given crop at BBCH > 70 is meant to cover those situations. The result is the same as exposure via the treated crop is null).

<sup>2</sup> Max. single application rate of 1440 g a.e./ha considered for risk calculation

**First-tier assessment (oral exposure) of the risk for honey bees due to the use of MON 52276 - pre-sowing, pre-planting and post-harvest uses at 1080 g a.e./ha**

| <b>Intended use</b>         | Root & tuber vegetables, Bulb vegetables, Fruiting vegetables, Brassica, Leafy vegetables, Stem vegetables, Sugar beet, Legume vegetables (Uses: 1b, 2a, 2b, 2c, 6a, 10a) |               |      |                |      |        |         |
|-----------------------------|---------------------------------------------------------------------------------------------------------------------------------------------------------------------------|---------------|------|----------------|------|--------|---------|
| <b>Application method</b>   | downward spraying                                                                                                                                                         |               |      |                |      |        |         |
| <b>Crop category</b>        | bare soil application – crop attractive for pollen and nectar <sup>1</sup>                                                                                                |               |      |                |      |        |         |
| <b>Active substance</b>     | Glyphosate                                                                                                                                                                |               |      |                |      |        |         |
| <b>Use pattern</b>          | 1-3 x 1080 g a.e./ha <sup>2</sup>                                                                                                                                         |               |      |                |      |        |         |
| Test design                 | Endpoint (lab.)                                                                                                                                                           | Scenario      | BBCH | E <sub>f</sub> | SV   | ETR    | Trigger |
| Adult chronic oral toxicity | LDD <sub>50</sub> > 179.9 µg a.e./bee/day                                                                                                                                 | treated crop  | <10  | 1              | 0.54 | <0.002 | 0.03    |
|                             |                                                                                                                                                                           | Weeds         | <10  | 1              | 0.27 | <0.001 |         |
|                             |                                                                                                                                                                           | field margin  | <10  | 0.0092         | 2.9  | <0.001 |         |
|                             |                                                                                                                                                                           | adjacent crop | <10  | 0.0033         | 5.8  | <0.001 |         |
|                             |                                                                                                                                                                           | next crop     | <10  | 1              | 0.54 | <0.002 |         |

Ef: exposure factor; SV: shortcut value; ETR: exposure toxicity ratio.

<sup>1</sup> Crop category chosen according to the recommendations of the EFSA GD on the Risk Assessment on Bees (2013) and the EFSA Screening Step and 1<sup>st</sup> Tier Calculator (technical note: for post-harvest uses, bare soil was selected however the given crop at BBCH > 70 is meant to cover those situations. The result is the same as exposure via the treated crop is null).

<sup>2</sup> Max. single application rate of 1080 g a.e./ha considered for risk calculation



**First-tier assessment (oral exposure) of the risk for honey bees due to the use of MON 52276 - pre-sowing, pre-planting and post-harvest uses at 720 g a.e./ha**

| <b>Intended use</b>         | Root & tuber vegetables, Bulb vegetables, Fruiting vegetables, Brassica, Leafy vegetables, Stem vegetables, Sugar beet, Legume vegetables<br>(Uses: 1c, 2b, 6b, 10b, 10c) |               |      |                |      |        |         |
|-----------------------------|---------------------------------------------------------------------------------------------------------------------------------------------------------------------------|---------------|------|----------------|------|--------|---------|
| <b>Application method</b>   | downward spraying                                                                                                                                                         |               |      |                |      |        |         |
| <b>Crop category</b>        | bare soil application – crop attractive for pollen and nectar <sup>1</sup>                                                                                                |               |      |                |      |        |         |
| <b>Active substance</b>     | Glyphosate                                                                                                                                                                |               |      |                |      |        |         |
| <b>Use pattern</b>          | 1-3 x 720 g a.e./ha <sup>2</sup>                                                                                                                                          |               |      |                |      |        |         |
| Test design                 | Endpoint (lab.)                                                                                                                                                           | Scenario      | BBCH | E <sub>f</sub> | SV   | ETR    | Trigger |
| Adult chronic oral toxicity | LDD <sub>50</sub> > 179.9 µg a.e./bee/day                                                                                                                                 | treated crop  | <10  | 1              | 0.54 | <0.002 | 0.03    |
|                             |                                                                                                                                                                           | Weeds         | <10  | 1              | 0.27 | <0.001 |         |
|                             |                                                                                                                                                                           | field margin  | <10  | 0.0092         | 2.9  | <0.001 |         |
|                             |                                                                                                                                                                           | adjacent crop | <10  | 0.0033         | 5.8  | <0.001 |         |
|                             |                                                                                                                                                                           | next crop     | <10  | 1              | 0.54 | <0.002 |         |

Ef: exposure factor; SV: shortcut value; ETR: exposure toxicity ratio.

<sup>1</sup> Crop category in the first tier oral assessment according to the EFSA GD on the Risk Assessment on Bees (2013)<sup>2</sup> Max. single application rate of 720 g a.e./ha considered for risk calculation**First-tier assessment (oral exposure) of the risk for honey bees due to the use of MON 52276 – fruiting vegetables**

| <b>Intended use</b>          | Fruiting vegetables, (Uses: 1, 2, 3, 6, 10)               |               |                      |                |      |                |         |
|------------------------------|-----------------------------------------------------------|---------------|----------------------|----------------|------|----------------|---------|
| <b>Application method</b>    | downward spraying                                         |               |                      |                |      |                |         |
| <b>Crop category</b>         | fruiting vegetables 1, fruiting vegetables 2 <sup>1</sup> |               |                      |                |      |                |         |
| <b>Active substance</b>      | Glyphosate                                                |               |                      |                |      |                |         |
| <b>Use pattern</b>           | 1-2 x 1440 g a.e./ha <sup>2</sup>                         |               |                      |                |      |                |         |
| Test design                  | Endpoint (lab.)                                           | Scenario      | BBCH                 | E <sub>f</sub> | SV   | ETR            | Trigger |
| <b>Fruiting vegetables 1</b> |                                                           |               |                      |                |      |                |         |
| Adult chronic oral toxicity  | LDD <sub>50</sub> > 179.9 µg a.e./bee/day                 | treated crop  | < 10                 | 1              | 0.54 | <0.003         | 0.03    |
|                              |                                                           |               | 10 - 49 <sup>3</sup> | 1              | 5.8  | < <b>0.033</b> |         |
|                              |                                                           |               | ≥ 70                 | 1              | 0    | <0.000         |         |
|                              |                                                           | Weeds         | < 10                 | 1              | 2.9  | <0.017         |         |
|                              |                                                           |               | 10 - 49 <sup>3</sup> | 1              | 2.9  | <0.017         |         |
|                              |                                                           |               | ≥ 70                 | 0.3            | 2.9  | <0.005         |         |
|                              |                                                           | field margin  | < 10                 | 0.0092         | 2.9  | <0.000         |         |
|                              |                                                           |               | 10 - 49 <sup>3</sup> | 0.0092         | 2.9  | <0.000         |         |
|                              |                                                           |               | ≥ 70                 | 0.0092         | 2.9  | <0.000         |         |
|                              |                                                           | adjacent crop | < 10                 | 0.0033         | 5.8  | <0.000         |         |
|                              |                                                           |               | 10 - 49 <sup>3</sup> | 0.0033         | 5.8  | <0.000         |         |
|                              |                                                           |               | ≥ 70                 | 0.0033         | 5.8  | <0.000         |         |
|                              |                                                           | next crop     | < 10                 | 1              | 0.54 | <0.003         |         |

| <b>Intended use</b>          | Fruiting vegetables, (Uses: 1, 2, 3, 6, 10)               |               |                      |                |       |        |         |
|------------------------------|-----------------------------------------------------------|---------------|----------------------|----------------|-------|--------|---------|
| <b>Application method</b>    | downward spraying                                         |               |                      |                |       |        |         |
| <b>Crop category</b>         | fruiting vegetables 1, fruiting vegetables 2 <sup>1</sup> |               |                      |                |       |        |         |
| <b>Active substance</b>      | Glyphosate                                                |               |                      |                |       |        |         |
| <b>Use pattern</b>           | 1-2 x 1440 g a.e./ha <sup>2</sup>                         |               |                      |                |       |        |         |
| Test design                  | Endpoint (lab.)                                           | Scenario      | BBCH                 | E <sub>f</sub> | SV    | ETR    | Trigger |
|                              |                                                           |               | 10 - 49 <sup>3</sup> | 1              | 0.54  | <0.003 |         |
|                              |                                                           |               | ≥ 70                 | 1              | 0.54  | <0.003 |         |
| <b>Fruiting vegetables 2</b> |                                                           |               |                      |                |       |        |         |
| Adult chronic oral toxicity  | LDD <sub>50</sub> > 179.9 µg a.e./bee/day                 | treated crop  | < 10                 | 1              | 0.012 | <0.000 | 0.03    |
|                              |                                                           |               | 10 - 49 <sup>3</sup> | 1              | 0.92  | <0.005 |         |
|                              |                                                           |               | ≥ 70                 | 1              | 0     | <0.000 |         |
|                              |                                                           | Weeds         | < 10                 | 1              | 2.9   | <0.017 |         |
|                              |                                                           |               | 10 - 49 <sup>3</sup> | 1              | 2.9   | <0.017 |         |
|                              |                                                           |               | ≥ 70                 | 0.3            | 2.9   | <0.005 |         |
|                              |                                                           | field margin  | < 10                 | 0.0092         | 2.9   | <0.000 |         |
|                              |                                                           |               | 10 - 49 <sup>3</sup> | 0.0092         | 2.9   | <0.000 |         |
|                              |                                                           |               | ≥ 70                 | 0.0092         | 2.9   | <0.000 |         |
|                              |                                                           | adjacent crop | < 10                 | 0.0033         | 5.8   | <0.000 |         |
|                              |                                                           |               | 10 - 49 <sup>3</sup> | 0.0033         | 5.8   | <0.000 |         |
|                              |                                                           |               | ≥ 70                 | 0.0033         | 5.8   | <0.000 |         |
|                              |                                                           | next crop     | < 10                 | 1              | 0.54  | <0.003 |         |
|                              |                                                           |               | 10 - 49 <sup>3</sup> | 1              | 0.54  | <0.003 |         |
|                              |                                                           |               | ≥ 70                 | 1              | 0.54  | <0.003 |         |

E<sub>f</sub>: exposure factor; SV: shortcut value; ETR: exposure toxicity ratio.

<sup>1</sup> Crop category chosen according to the recommendations of the EFSA GD on the Risk Assessment on Bees (2013) and the EFSA Screening Step and 1<sup>st</sup> Tier Calculator

<sup>2</sup> Max. single application rate of 1440 g a.e./ha considered for risk calculation as it covers lower rates.

<sup>3</sup> Scenario only relevant for uses 6a and b for which the highest intended application rate is 1.08 kg a.s./ha.

Note: The treated crop scenario at BBCH ≥ 70 is not relevant for uses restricted to pre-sowing, pre-planting, pre-emergence and early post applications.

**First-tier assessment (oral exposure) of the risk for honey bees due to the use of MON 52276 - root vegetables**

| <b>Intended use</b>         |                                           | Root vegetables (Uses: 1, 2, 3, 6, 10) |                      |           |           |            |                |
|-----------------------------|-------------------------------------------|----------------------------------------|----------------------|-----------|-----------|------------|----------------|
| <b>Application method</b>   |                                           | downward spraying                      |                      |           |           |            |                |
| <b>Crop category</b>        |                                           | Root vegetables <sup>1</sup>           |                      |           |           |            |                |
| <b>Active substance</b>     |                                           | Glyphosate                             |                      |           |           |            |                |
| <b>Use pattern</b>          |                                           | 1-3 x 1440 g a.e./ha <sup>2</sup>      |                      |           |           |            |                |
| <b>Test design</b>          | <b>Endpoint (lab.)</b>                    | <b>Scenario</b>                        | <b>BBCH</b>          | <b>Ef</b> | <b>SV</b> | <b>ETR</b> | <b>Trigger</b> |
| Adult chronic oral toxicity | LDD <sub>50</sub> > 179.9 µg a.e./bee/day | treated crop                           | < 10                 | 1         | 0.54      | <0.003     | 0.03           |
|                             |                                           |                                        | 10 - 39 <sup>3</sup> | 1         | 5.8       | <0.033     |                |
|                             |                                           |                                        | ≥ 70                 | 1         | 0         | <0.000     |                |
|                             |                                           | Weeds                                  | < 10                 | 1         | 2.9       | <0.017     |                |
|                             |                                           |                                        | 10 - 39 <sup>3</sup> | 1         | 2.9       | <0.017     |                |
|                             |                                           |                                        | ≥ 70                 | 0.3       | 2.9       | <0.005     |                |
|                             |                                           | field margin                           | < 10                 | 0.0092    | 2.9       | <0.000     |                |
|                             |                                           |                                        | 10 - 39 <sup>3</sup> | 0.0092    | 2.9       | <0.000     |                |
|                             |                                           |                                        | ≥ 70                 | 0.0092    | 2.9       | <0.000     |                |
|                             |                                           | adjacent crop                          | < 10                 | 0.0033    | 5.8       | <0.000     |                |
|                             |                                           |                                        | 10 - 39 <sup>3</sup> | 0.0033    | 5.8       | <0.000     |                |
|                             |                                           |                                        | ≥ 70                 | 0.0033    | 5.8       | <0.000     |                |
|                             |                                           | next crop                              | < 10                 | 1         | 0.54      | <0.003     |                |
|                             |                                           |                                        | 10 - 39 <sup>3</sup> | 1         | 0.54      | <0.003     |                |
|                             |                                           |                                        | ≥ 70                 | 1         | 0.54      | <0.003     |                |

Ef: exposure factor; SV: shortcut value; ETR: exposure toxicity ratio.

<sup>1</sup> Crop category chosen according to the recommendations of the EFSA GD on the Risk Assessment on Bees (2013) and the EFSA Screening Step and 1<sup>st</sup> Tier Calculator, e.g. fruiting vegetables 2 = tomatoes, eggplants

<sup>2</sup> Max. single application rate of 1440 g a.e./ha considered for risk calculation as it covers lower rates.

<sup>3</sup> Scenario only relevant for uses 6a and b for which the highest intended application rate is 1.08 kg a.s./ha.

Note: The treated crop scenario at BBCH ≥ 70 is not relevant for uses restricted to pre-sowing, pre-planting, pre-emergence and early post applications.

**First-tier assessment (oral exposure) of the risk for honey bees due to the use of MON 52276 –tuber vegetables**

| <b>Intended use</b>         |                                           | Tuber vegetables (Uses: 1, 2, 3, 6, 10) |                      |           |           |            |                |      |      |      |
|-----------------------------|-------------------------------------------|-----------------------------------------|----------------------|-----------|-----------|------------|----------------|------|------|------|
| <b>Application method</b>   |                                           | downward spraying                       |                      |           |           |            |                |      |      |      |
| <b>Crop category</b>        |                                           | potatoes <sup>1</sup>                   |                      |           |           |            |                |      |      |      |
| <b>Active substance</b>     |                                           | Glyphosate                              |                      |           |           |            |                |      |      |      |
| <b>Use pattern</b>          |                                           | 1-3 x 1440 g a.e./ha <sup>2</sup>       |                      |           |           |            |                |      |      |      |
| <b>Test design</b>          | <b>Endpoint (lab.)</b>                    | <b>Scenario</b>                         | <b>BBCH</b>          | <b>Ef</b> | <b>SV</b> | <b>ETR</b> | <b>Trigger</b> |      |      |      |
| Adult chronic oral toxicity | LDD <sub>50</sub> > 179.9 µg a.e./bee/day | treated crop                            | < 10                 | 1         | 0.012     | <0.000     | 0.03           |      |      |      |
|                             |                                           |                                         | 10 - 39 <sup>3</sup> | 1         | 0.92      | <0.005     |                |      |      |      |
|                             |                                           |                                         | ≥ 70                 | 1         | 0         | <0.000     |                |      |      |      |
|                             |                                           | Weeds                                   | < 10                 | 1         | 2.9       | <0.017     |                | 0.03 |      |      |
|                             |                                           |                                         | 10 - 39 <sup>3</sup> | 1         | 2.9       | <0.017     |                |      |      |      |
|                             |                                           |                                         | ≥ 70                 | 0.3       | 2.9       | <0.005     |                |      |      |      |
|                             |                                           | field margin                            | < 10                 | 0.0092    | 2.9       | <0.000     |                |      | 0.03 |      |
|                             |                                           |                                         | 10 - 39 <sup>3</sup> | 0.0092    | 2.9       | <0.000     |                |      |      |      |
|                             |                                           |                                         | ≥ 70                 | 0.0092    | 2.9       | <0.000     |                |      |      |      |
|                             |                                           | adjacent crop                           | < 10                 | 0.0033    | 5.8       | <0.000     |                |      |      | 0.03 |
|                             |                                           |                                         | 10 - 39 <sup>3</sup> | 0.0033    | 5.8       | <0.000     |                |      |      |      |
|                             |                                           |                                         | ≥ 70                 | 0.0033    | 5.8       | <0.000     |                |      |      |      |
| next crop                   | < 10                                      | 1                                       | 0.54                 | <0.003    | 0.03      |            |                |      |      |      |
|                             | 10 - 39 <sup>3</sup>                      | 1                                       | 0.54                 | <0.003    |           |            |                |      |      |      |
|                             | ≥ 70                                      | 1                                       | 0.54                 | <0.003    |           |            |                |      |      |      |

Ef: exposure factor; SV: shortcut value; ETR: exposure toxicity ratio.

<sup>1</sup> Crop category chosen according to the recommendations of the EFSA GD on the Risk Assessment on Bees (2013) and the EFSA Screening Step and 1<sup>st</sup> Tier Calculator, e.g. fruiting vegetables 2 = tomatoes, eggplants

<sup>2</sup> Max. single application rate of 1440 g a.e./ha considered for risk calculation as it covers lower rates.

<sup>3</sup> Scenario only relevant for uses 6a and b for which the highest intended application rate is 1.08 kg a.s./ha.

Note: The treated crop scenario at BBCH ≥ 70 is not relevant for uses restricted to pre-sowing, pre-planting, pre-emergence and early post applications.

**First-tier assessment (oral exposure) of the risk for honey bees due to the use of MON 52276 – Bulb vegetables**

| <b>Intended use</b>         |                                           | Bulb vegetables (Uses: 1, 2, 3, 6, 10) |                      |        |      |        |         |  |
|-----------------------------|-------------------------------------------|----------------------------------------|----------------------|--------|------|--------|---------|--|
| <b>Application method</b>   |                                           | downward spraying                      |                      |        |      |        |         |  |
| <b>Crop category</b>        |                                           | bulb vegetables <sup>1</sup>           |                      |        |      |        |         |  |
| <b>Active substance</b>     |                                           | Glyphosate                             |                      |        |      |        |         |  |
| <b>Use pattern</b>          |                                           | 1-2 x 1440 g a.e./ha <sup>2</sup>      |                      |        |      |        |         |  |
| Test design                 | Endpoint (lab.)                           | Scenario                               | BBCH                 | Ef     | SV   | ETR    | Trigger |  |
| Adult chronic oral toxicity | LDD <sub>50</sub> > 179.9 µg a.e./bee/day | treated crop                           | < 10                 | 1      | 0.54 | <0.003 | 0.03    |  |
|                             |                                           |                                        | 10 - 39 <sup>3</sup> | 1      | 5.8  | <0.033 |         |  |
|                             |                                           |                                        | ≥ 70                 | 1      | 0    | <0.000 |         |  |
|                             |                                           | Weeds                                  | < 10                 | 1      | 2.9  | <0.017 |         |  |
|                             |                                           |                                        | 10 - 39 <sup>3</sup> | 1      | 2.9  | <0.017 |         |  |
|                             |                                           |                                        | ≥ 70                 | 0.6    | 2.9  | <0.010 |         |  |
|                             |                                           | field margin                           | < 10                 | 0.0092 | 2.9  | <0.000 |         |  |
|                             |                                           |                                        | 10 - 39 <sup>3</sup> | 0.0092 | 2.9  | <0.000 |         |  |
|                             |                                           |                                        | ≥ 70                 | 0.0092 | 2.9  | <0.000 |         |  |
|                             |                                           | adjacent crop                          | < 10                 | 0.0033 | 5.8  | <0.000 |         |  |
|                             |                                           |                                        | 10 - 39 <sup>3</sup> | 0.0033 | 5.8  | <0.000 |         |  |
|                             |                                           |                                        | ≥ 70                 | 0.0033 | 5.8  | <0.000 |         |  |
|                             |                                           | next crop                              | < 10                 | 1      | 0.54 | <0.003 |         |  |
|                             |                                           |                                        | 10 - 39 <sup>3</sup> | 1      | 0.54 | <0.003 |         |  |
|                             |                                           |                                        | ≥ 70                 | 1      | 0.54 | <0.003 |         |  |

Ef: exposure factor; SV: shortcut value; ETR: exposure toxicity ratio.

<sup>1</sup> Crop category chosen according to the recommendations of the EFSA GD on the Risk Assessment on Bees (2013) and the EFSA Screening Step and 1<sup>st</sup> Tier Calculator,

<sup>2</sup> Max. single application rate of 1440 g a.e./ha considered for risk calculation as it covers lower rates.

<sup>3</sup> Scenario only relevant for uses 6a and b for which the highest intended application rate is 1.08 kg a.s./ha.

Note: The treated crop scenario at BBCH ≥ 70 is not relevant for uses restricted to pre-sowing, pre-planting, pre-emergence and early post applications.

**First-tier assessment (oral exposure) of the risk for honey bees due to the use of MON 52276 - Brassica, leafy and stem vegetables**

| <b>Intended use</b>       |                 | Brassica, leafy vegetables, stem vegetables (Uses: 1, 2, 3, 6, 10) |      |    |      |        |         |
|---------------------------|-----------------|--------------------------------------------------------------------|------|----|------|--------|---------|
| <b>Application method</b> |                 | downward spraying                                                  |      |    |      |        |         |
| <b>Crop category</b>      |                 | leafy vegetables, lettuce <sup>1</sup>                             |      |    |      |        |         |
| <b>Active substance</b>   |                 | Glyphosate                                                         |      |    |      |        |         |
| <b>Use pattern</b>        |                 | 1-3 x 1440 g a.e./ha <sup>2</sup>                                  |      |    |      |        |         |
| Test design               | Endpoint (lab.) | Scenario                                                           | BBCH | Ef | SV   | ETR    | Trigger |
| <b>Leafy vegetables</b>   |                 |                                                                    |      |    |      |        |         |
|                           |                 | treated crop                                                       | < 10 | 1  | 0.54 | <0.003 | 0.03    |

| <b>Intended use</b>         |                                           | Brassica, leafy vegetables, stem vegetables<br>(Uses: 1, 2, 3, 6, 10) |                      |        |       |        |         |
|-----------------------------|-------------------------------------------|-----------------------------------------------------------------------|----------------------|--------|-------|--------|---------|
| <b>Application method</b>   |                                           | downward spraying                                                     |                      |        |       |        |         |
| <b>Crop category</b>        |                                           | leafy vegetables, lettuce <sup>1</sup>                                |                      |        |       |        |         |
| <b>Active substance</b>     |                                           | Glyphosate                                                            |                      |        |       |        |         |
| <b>Use pattern</b>          |                                           | 1-3 x 1440 g a.e./ha <sup>2</sup>                                     |                      |        |       |        |         |
| Test design                 | Endpoint (lab.)                           | Scenario                                                              | BBCH                 | Ef     | SV    | ETR    | Trigger |
| Adult chronic oral toxicity | LDD <sub>50</sub> > 179.9 µg a.e./bee/day |                                                                       | 10 - 49 <sup>3</sup> | 1      | 5.8   | <0.033 | 0.03    |
|                             |                                           |                                                                       | ≥ 70                 | 1      | 0     | <0.000 |         |
|                             |                                           | Weeds                                                                 | < 10                 | 1      | 2.9   | <0.017 |         |
|                             |                                           |                                                                       | 10 - 49 <sup>3</sup> | 1      | 2.9   | <0.017 |         |
|                             |                                           |                                                                       | ≥ 70                 | 0.3    | 2.9   | <0.005 |         |
|                             |                                           | field margin                                                          | < 10                 | 0.0092 | 2.9   | <0.000 |         |
|                             |                                           |                                                                       | 10 - 49 <sup>3</sup> | 0.0092 | 2.9   | <0.000 |         |
|                             |                                           |                                                                       | ≥ 70                 | 0.0092 | 2.9   | <0.000 |         |
|                             |                                           | adjacent crop                                                         | < 10                 | 0.0033 | 5.8   | <0.000 |         |
|                             |                                           |                                                                       | 10 - 49 <sup>3</sup> | 0.0033 | 5.8   | <0.000 |         |
|                             |                                           |                                                                       | ≥ 70                 | 0.0033 | 5.8   | <0.000 |         |
|                             |                                           | next crop                                                             | < 10                 | 1      | 0.54  | <0.003 |         |
|                             |                                           |                                                                       | 10 - 49 <sup>3</sup> | 1      | 0.54  | <0.003 |         |
|                             |                                           |                                                                       | ≥ 70                 | 1      | 0.54  | <0.003 |         |
|                             |                                           | <b>Lettuce</b>                                                        |                      |        |       |        |         |
| Adult chronic oral toxicity | LDD <sub>50</sub> > 179.9 µg a.e./bee/day | treated crop                                                          | < 10                 | 1      | 0.012 | <0.000 |         |
|                             |                                           |                                                                       | 10 - 49 <sup>3</sup> | 1      | 0.92  | <0.005 |         |
|                             |                                           |                                                                       | ≥ 70                 | 1      | 0     | <0.000 |         |
|                             |                                           | Weeds                                                                 | < 10                 | 1      | 2.9   | <0.017 |         |
|                             |                                           |                                                                       | 10 - 49 <sup>3</sup> | 1      | 2.9   | <0.017 |         |
|                             |                                           |                                                                       | ≥ 70                 | 0.3    | 2.9   | <0.005 |         |
|                             |                                           | field margin                                                          | < 10                 | 0.0092 | 2.9   | <0.000 |         |
|                             |                                           |                                                                       | 10 - 49 <sup>3</sup> | 0.0092 | 2.9   | <0.000 |         |
|                             |                                           |                                                                       | ≥ 70                 | 0.0092 | 2.9   | <0.000 |         |
|                             |                                           | adjacent crop                                                         | < 10                 | 0.0033 | 5.8   | <0.000 |         |
|                             |                                           |                                                                       | 10 - 49 <sup>3</sup> | 0.0033 | 5.8   | <0.000 |         |
|                             |                                           |                                                                       | ≥ 70                 | 0.0033 | 5.8   | <0.000 |         |
|                             |                                           | next crop                                                             | < 10                 | 1      | 0.54  | <0.003 |         |
|                             |                                           |                                                                       | 10 - 49 <sup>3</sup> | 1      | 0.54  | <0.003 |         |
|                             |                                           |                                                                       | ≥ 70                 | 1      | 0.54  | <0.003 |         |

Ef: exposure factor; SV: shortcut value; ETR: exposure toxicity ratio.

<sup>1</sup> Crop category chosen according to the recommendations of the EFSA GD on the Risk Assessment on Bees (2013) and the EFSA Screening Step and 1<sup>st</sup> Tier Calculator,

<sup>2</sup> Max. single application rate of 1440 g a.e./ha considered for risk calculation as it covers lower rates.

<sup>3</sup> Scenario only relevant for uses 6a and b for which the highest intended application rate is 1.08 kg a.s./ha.

Note: The treated crop scenario at BBCH  $\geq 70$  is not relevant for uses restricted to pre-sowing, pre-planting, pre-emergence and early post applications.

**First-tier assessment (oral exposure) of the risk for honey bees due to the use of MON 52276 - Sugar beet**

| <b>Intended use</b>         |                                           | Sugar beet (Uses: 1, 2, 3, 10)    |           |        |      |        |         |
|-----------------------------|-------------------------------------------|-----------------------------------|-----------|--------|------|--------|---------|
| <b>Application method</b>   |                                           | downward spraying                 |           |        |      |        |         |
| <b>Crop category</b>        |                                           | sugar beet <sup>1</sup>           |           |        |      |        |         |
| <b>Active substance</b>     |                                           | Glyphosate                        |           |        |      |        |         |
| <b>Use pattern</b>          |                                           | 1-3 x 1440 g a.e./ha <sup>2</sup> |           |        |      |        |         |
| Test design                 | Endpoint (lab.)                           | Scenario                          | BBCH      | Ef     | SV   | ETR    | Trigger |
| Adult chronic oral toxicity | LDD <sub>50</sub> > 179.9 µg a.e./bee/day | treated crop                      | < 10      | 1      | 0.54 | <0.003 | 0.03    |
|                             |                                           |                                   | $\geq 70$ | 1      | 0    | <0.000 |         |
|                             |                                           | Weeds                             | < 10      | 1      | 2.9  | <0.017 |         |
|                             |                                           |                                   | $\geq 70$ | 0.25   | 2.9  | <0.004 |         |
|                             |                                           | field margin                      | < 10      | 0.0092 | 2.9  | <0.000 |         |
|                             |                                           |                                   | $\geq 70$ | 0.0092 | 2.9  | <0.000 |         |
|                             |                                           | adjacent crop                     | < 10      | 0.0033 | 5.8  | <0.000 |         |
|                             |                                           |                                   | $\geq 70$ | 0.0033 | 5.8  | <0.000 |         |
|                             |                                           | next crop                         | < 10      | 1      | 0.54 | <0.003 |         |
|                             |                                           |                                   | $\geq 70$ | 1      | 0.54 | <0.003 |         |

Ef: exposure factor; SV: shortcut value; ETR: exposure toxicity ratio.

<sup>1</sup> Crop category chosen according to the recommendations of the EFSA GD on the Risk Assessment on Bees (2013) and the EFSA Screening Step and 1<sup>st</sup> Tier Calculator,

<sup>2</sup> Max. single application rate of 1440 g a.e./ha considered for risk calculation as it covers lower rates.

Note: The treated crop scenario at BBCH  $\geq 70$  is not relevant for uses restricted to pre-sowing, pre-planting, pre-emergence and early post applications.

**First-tier assessment (oral exposure) of the risk for honey bees due to the use of MON 52276 - legume vegetables**

| <b>Intended use</b>         |                                           | Legume vegetables (Uses: 1, 2, 3, 6, 10) |                      |           |           |            |                |  |
|-----------------------------|-------------------------------------------|------------------------------------------|----------------------|-----------|-----------|------------|----------------|--|
| <b>Application method</b>   |                                           | downward spraying                        |                      |           |           |            |                |  |
| <b>Crop category</b>        |                                           | pulses <sup>1</sup>                      |                      |           |           |            |                |  |
| <b>Active substance</b>     |                                           | Glyphosate                               |                      |           |           |            |                |  |
| <b>Use pattern</b>          |                                           | 1-2 x 1440 g a.e./ha <sup>2</sup>        |                      |           |           |            |                |  |
| <b>Test design</b>          | <b>Endpoint (lab.)</b>                    | <b>Scenario</b>                          | <b>BBCH</b>          | <b>Ef</b> | <b>SV</b> | <b>ETR</b> | <b>Trigger</b> |  |
| Adult chronic oral toxicity | LDD <sub>50</sub> > 179.9 µg a.e./bee/day | treated crop                             | < 10                 | 1         | 0.54      | <0.003     | 0.03           |  |
|                             |                                           |                                          | 10 - 49 <sup>3</sup> | 1         | 5.8       | <0.033     |                |  |
|                             |                                           |                                          | ≥ 70                 | 1         | 0         | <0.000     |                |  |
|                             |                                           | Weeds                                    | < 10                 | 1         | 2.9       | <0.017     |                |  |
|                             |                                           |                                          | 10 - 49 <sup>3</sup> | 1         | 2.9       | <0.017     |                |  |
|                             |                                           |                                          | ≥ 70                 | 0.3       | 2.9       | <0.005     |                |  |
|                             |                                           | field margin                             | < 10                 | 0.0092    | 2.9       | <0.000     |                |  |
|                             |                                           |                                          | 10 - 49 <sup>3</sup> | 0.0092    | 2.9       | <0.000     |                |  |
|                             |                                           |                                          | ≥ 70                 | 0.0092    | 2.9       | <0.000     |                |  |
|                             |                                           | adjacent crop                            | < 10                 | 0.0033    | 5.8       | <0.000     |                |  |
|                             |                                           |                                          | 10 - 49 <sup>3</sup> | 0.0033    | 5.8       | <0.000     |                |  |
|                             |                                           |                                          | ≥ 70                 | 0.0033    | 5.8       | <0.000     |                |  |
| next crop                   | < 10                                      | 1                                        | 0.54                 | <0.003    |           |            |                |  |
|                             | 10 - 49 <sup>3</sup>                      | 1                                        | 0.54                 | <0.003    |           |            |                |  |
|                             | ≥ 70                                      | 1                                        | 0.54                 | <0.003    |           |            |                |  |

Ef: exposure factor; SV: shortcut value; ETR: exposure toxicity ratio.

<sup>1</sup> Crop category chosen according to the recommendations of the EFSA GD on the Risk Assessment on Bees (2013) and the EFSA Screening Step and 1<sup>st</sup> Tier Calculator,

<sup>2</sup> Max. single application rate of 1440 g a.e./ha considered for risk calculation as it covers lower rates.

<sup>3</sup> Scenario only relevant for uses 6a and b for which the highest intended application rate is 1.08 kg a.s./ha.

Note: The treated crop scenario at BBCH ≥ 70 is not relevant for uses restricted to pre-sowing, pre-planting, pre-emergence and early post applications.



**First-tier assessment (oral exposure) of the risk for honey bees due to the use of MON 52276 on fruiting, root, bulb and leafy vegetables and pulses for “treated crop” scenario at all application rates for uses 6a and 6b**

|                           |                                                                                                    |                                                  |                      |           |            |                |
|---------------------------|----------------------------------------------------------------------------------------------------|--------------------------------------------------|----------------------|-----------|------------|----------------|
| <b>Crop</b>               | Fruiting vegetables 1, Root vegetables, Bulb vegetables, Leafy vegetables, Pulses (uses 6a and 6b) |                                                  |                      |           |            |                |
| <b>Application method</b> | downward spraying                                                                                  |                                                  |                      |           |            |                |
| <b>Active substance</b>   | Glyphosate                                                                                         |                                                  |                      |           |            |                |
| <b>Toxicity value</b>     | LDD <sub>50</sub> > 179.9 µg a.e./bee/day                                                          |                                                  |                      |           |            |                |
| <b>Scenario</b>           | <b>BBCH stage</b>                                                                                  | <b>Max. single application rate (kg a.e./ha)</b> | <b>E<sub>f</sub></b> | <b>SV</b> | <b>ETR</b> | <b>Trigger</b> |
| Treated crop              | BBCH 10-39 or BBCH 10-49                                                                           | 1.08                                             | 1                    | 5.8       | <0.025     | 0.03           |
|                           |                                                                                                    | 0.72                                             | 1                    | 5.8       | <0.017     |                |

**First Tier risk assessment for acute oral exposure of bumble bees**

**First-tier assessment (oral exposure) of the risk for bumble bees due to the use of MON 52276 in orchard crops and vines at 1440 g a.e./ha**

|                           |                                     |                 |             |                      |           |            |                |
|---------------------------|-------------------------------------|-----------------|-------------|----------------------|-----------|------------|----------------|
| <b>Intended use</b>       | Orchard crops, vines (Uses: 4a, 5a) |                 |             |                      |           |            |                |
| <b>Application method</b> | downward spraying                   |                 |             |                      |           |            |                |
| <b>Crop Category</b>      | under crop application <sup>1</sup> |                 |             |                      |           |            |                |
| <b>Active substance</b>   | Glyphosate                          |                 |             |                      |           |            |                |
| <b>Use pattern</b>        | 1-2 x 1440 g a.e./ha <sup>2</sup>   |                 |             |                      |           |            |                |
| <b>Test design</b>        | <b>Endpoint (lab.)</b>              | <b>Scenario</b> | <b>BBCH</b> | <b>E<sub>f</sub></b> | <b>SV</b> | <b>ETR</b> | <b>Trigger</b> |
| Acute oral toxicity       | LD <sub>50</sub> > 412 µg a.e./bee  | weeds           | weed <10    | 1                    | 0.46      | <0.01      | 0.036          |
|                           |                                     |                 | weed ≥10    | 1                    | 6.5       | <0.023     |                |
|                           |                                     | field margin    | weed <10    | 0.0092               | 6.5       | <0.01      |                |
|                           |                                     |                 | weed ≥10    | 0.0092               | 6.5       | <0.01      |                |
|                           |                                     | adjacent crop   | weed <10    | 0.0033               | 11.2      | <0.01      |                |
|                           |                                     |                 | weed ≥10    | 0.0033               | 11.2      | <0.01      |                |
|                           |                                     | next crop       | weed <10    | 1                    | 0.9       | <0.01      |                |
|                           |                                     |                 | weed ≥10    | 1                    | 0.9       | <0.01      |                |

E<sub>f</sub>: exposure factor; SV: shortcut value; ETR: exposure toxicity ratio.

<sup>1</sup> Crop category chosen according to the recommendations of the EFSA GD on the Risk Assessment on Bees (2013) and the EFSA Screening Step and 1<sup>st</sup> Tier Calculator

<sup>2</sup> Max. single application rate of 1440 g a.e./ha considered for risk calculation

**First-tier assessment (oral exposure) of the risk for bumble bees due to the use of MON 52276 – railway tracks at 1800 g a.e./ha**

| <b>Intended use</b>       |                                    | Railway tracks (Uses: 7a, 7b)       |          |                |      |        |         |
|---------------------------|------------------------------------|-------------------------------------|----------|----------------|------|--------|---------|
| <b>Application method</b> |                                    | downward spraying                   |          |                |      |        |         |
| <b>Crop Category</b>      |                                    | under crop application <sup>1</sup> |          |                |      |        |         |
| <b>Active substance</b>   |                                    | Glyphosate                          |          |                |      |        |         |
| <b>Use pattern</b>        |                                    | 1-2 x 1800 g a.e./ha <sup>2</sup>   |          |                |      |        |         |
| Test design               | Endpoint (lab.)                    | Scenario                            | BBCH     | E <sub>f</sub> | SV   | ETR    | Trigger |
| Acute oral toxicity       | LD <sub>50</sub> > 412 µg a.e./bee | weeds                               | weed <10 | 1              | 0.46 | <0.002 | 0.036   |
|                           |                                    |                                     | weed ≥10 | 1              | 6.5  | <0.028 |         |
|                           |                                    | field margin                        | weed <10 | 0.0092         | 6.5  | <0.001 |         |
|                           |                                    |                                     | weed ≥10 | 0.0092         | 6.5  | <0.001 |         |
|                           |                                    | adjacent crop                       | weed <10 | 0.0033         | 11.2 | <0.001 |         |
|                           |                                    |                                     | weed ≥10 | 0.0033         | 11.2 | <0.001 |         |
|                           |                                    | next crop                           | weed <10 | 1              | 0.9  | <0.004 |         |
|                           |                                    |                                     | weed ≥10 | 1              | 0.9  | <0.004 |         |

E<sub>f</sub>: exposure factor; SV: shortcut value; ETR: exposure toxicity ratio.

<sup>1</sup> As no definite scenario for railway tracks is provided by the EFSA GD on the Risk Assessment on Bees (2013) and the EFSA Screening Step and 1<sup>st</sup> Tier Calculator, the under crop application was considered to address uses on railway tracks

<sup>2</sup> Max. single application rate of 1800 g a.e./ha considered for risk calculation

**First-tier assessment (oral exposure) of the risk for bumble bees due to the use of MON 52276 – invasive plant species in agricultural and non-agricultural areas at 1800 g a.e./ha**

| <b>Intended use</b>       |                                    | invasive plant species in agricultural and non-agricultural areas (Uses: 8, 9) |          |                |      |        |         |
|---------------------------|------------------------------------|--------------------------------------------------------------------------------|----------|----------------|------|--------|---------|
| <b>Application method</b> |                                    | downward spraying                                                              |          |                |      |        |         |
| <b>Crop Category</b>      |                                    | under crop application <sup>1</sup>                                            |          |                |      |        |         |
| <b>Active substance</b>   |                                    | Glyphosate                                                                     |          |                |      |        |         |
| <b>Use pattern</b>        |                                    | 1 x 1800 g a.e./ha <sup>2</sup>                                                |          |                |      |        |         |
| Test design               | Endpoint (lab.)                    | Scenario                                                                       | BBCH     | E <sub>f</sub> | SV   | ETR    | Trigger |
| Acute oral toxicity       | LD <sub>50</sub> > 412 µg a.e./bee | weeds                                                                          | weed <10 | 1              | 0.46 | <0.002 | 0.036   |
|                           |                                    |                                                                                | weed >10 | 1              | 6.5  | <0.028 |         |
|                           |                                    | field margin                                                                   | weed <10 | 0.0092         | 6.5  | <0.001 |         |
|                           |                                    |                                                                                | weed >10 | 0.0092         | 6.5  | <0.001 |         |
|                           |                                    | adjacent crop                                                                  | weed <10 | 0.0033         | 11.2 | <0.001 |         |
|                           |                                    |                                                                                | weed >10 | 0.0033         | 11.2 | <0.001 |         |
|                           |                                    | next crop                                                                      | weed <10 | 1              | 0.9  | <0.004 |         |
|                           |                                    |                                                                                | weed >10 | 1              | 0.9  | <0.004 |         |

E<sub>f</sub>: exposure factor; SV: shortcut value; ETR: exposure toxicity ratio.

<sup>1</sup> As no definite scenario for invasive weeds is provided by the EFSA GD on the Risk Assessment on Bees (2013) and the EFSA Screening Step and 1<sup>st</sup> Tier Calculator, under crop application: giant hogweed (*Heracleum* spp.), Japanese knotweed (*Reynoutria japonica*)

<sup>2</sup> Max. single application rate of 1800 g a.e./ha considered for risk calculation

**First-tier assessment (oral exposure) of the risk for bumble bees due to the use of MON 52276 –pre-sowing, pre-planting and post-harvest uses at 1440 g a.e./ha**

| <b>Intended use</b>       | Root & tuber vegetables, Bulb vegetables, Fruiting vegetables, Brassica, Leafy vegetables, Stem vegetables, Sugar beet (Uses: 1a, 2a) |               |      |                |      |        |         |
|---------------------------|---------------------------------------------------------------------------------------------------------------------------------------|---------------|------|----------------|------|--------|---------|
| <b>Application method</b> | downward spraying                                                                                                                     |               |      |                |      |        |         |
| <b>Crop category</b>      | bare soil application – crop attractive for pollen and nectar <sup>1</sup>                                                            |               |      |                |      |        |         |
| <b>Active substance</b>   | Glyphosate                                                                                                                            |               |      |                |      |        |         |
| <b>Use pattern</b>        | 1-2 x 1440 g a.e./ha <sup>2</sup>                                                                                                     |               |      |                |      |        |         |
| Test design               | Endpoint (lab.)                                                                                                                       | Scenario      | BBCH | E <sub>f</sub> | SV   | ETR    | Trigger |
| Acute oral toxicity       | LD <sub>50</sub> > 412 µg a.e./bee                                                                                                    | treated crop  | <10  | 1              | 0.9  | <0.004 | 0.036   |
|                           |                                                                                                                                       | weeds         | <10  | 1              | 0.46 | <0.002 |         |
|                           |                                                                                                                                       | field margin  | <10  | 0.0092         | 6.5  | <0.001 |         |
|                           |                                                                                                                                       | adjacent crop | <10  | 0.0033         | 11.2 | <0.001 |         |
|                           |                                                                                                                                       | next crop     | <10  | 1              | 0.9  | <0.004 |         |

E<sub>f</sub>: exposure factor; SV: shortcut value; ETR: exposure toxicity ratio.<sup>1</sup> Crop category chosen according to the recommendations of the EFSA GD on the Risk Assessment on Bees (2013) and the EFSA Screening Step and 1<sup>st</sup> Tier Calculator<sup>2</sup> Max. single application rate of 1440 g a.e./ha considered for risk calculation as it covers lower application rates.**First-tier assessment (oral exposure) of the risk for bumble bees due to the use of MON 52276 – fruiting vegetables**

| <b>Intended use</b>          | Fruiting vegetables, (Uses: 1, 2, 3, 6, 10)               |               |                      |                |      |                   |         |
|------------------------------|-----------------------------------------------------------|---------------|----------------------|----------------|------|-------------------|---------|
| <b>Application method</b>    | downward spraying                                         |               |                      |                |      |                   |         |
| <b>Crop category</b>         | fruiting vegetables 1, fruiting vegetables 2 <sup>1</sup> |               |                      |                |      |                   |         |
| <b>Active substance</b>      | Glyphosate                                                |               |                      |                |      |                   |         |
| <b>Use pattern</b>           | 1-2 x 1440 g a.e./ha <sup>2</sup>                         |               |                      |                |      |                   |         |
| Test design                  | Endpoint (lab.)                                           | Scenario      | BBCH                 | E <sub>f</sub> | SV   | ETR               | Trigger |
| <b>Fruiting vegetables 1</b> |                                                           |               |                      |                |      |                   |         |
| Acute oral toxicity          | LD <sub>50</sub> > 412 µg a.e./bee                        | treated crop  | < 10                 | 1              | 0.9  | <0.0031           | 0.036   |
|                              |                                                           |               | 10 - 49 <sup>3</sup> | 1              | 11.2 | <b>&lt;0.0391</b> |         |
|                              |                                                           |               | ≥ 70                 | 1              | 0    | <0.0000           |         |
|                              |                                                           | Weeds         | < 10                 | 1              | 6.5  | <0.0227           |         |
|                              |                                                           |               | 10 - 49 <sup>3</sup> | 1              | 6.5  | <0.0227           |         |
|                              |                                                           |               | ≥ 70                 | 0.3            | 6.5  | <0.0068           |         |
|                              |                                                           | field margin  | < 10                 | 0.0092         | 6.5  | <0.0002           |         |
|                              |                                                           |               | 10 - 49 <sup>3</sup> | 0.0092         | 6.5  | <0.0002           |         |
|                              |                                                           |               | ≥ 70                 | 0.0092         | 6.5  | <0.0002           |         |
|                              |                                                           | adjacent crop | < 10                 | 0.0033         | 11.2 | <0.0001           |         |
|                              |                                                           |               | 10 - 49 <sup>3</sup> | 0.0033         | 11.2 | <0.0001           |         |
|                              |                                                           |               | ≥ 70                 | 0.0033         | 11.2 | <0.0001           |         |
|                              |                                                           | next crop     | < 10                 | 1              | 0.9  | <0.0031           |         |

| <b>Intended use</b>          |                                    | Fruiting vegetables, (Uses: 1, 2, 3, 6, 10)               |                      |                |      |         |         |
|------------------------------|------------------------------------|-----------------------------------------------------------|----------------------|----------------|------|---------|---------|
| <b>Application method</b>    |                                    | downward spraying                                         |                      |                |      |         |         |
| <b>Crop category</b>         |                                    | fruiting vegetables 1, fruiting vegetables 2 <sup>1</sup> |                      |                |      |         |         |
| <b>Active substance</b>      |                                    | Glyphosate                                                |                      |                |      |         |         |
| <b>Use pattern</b>           |                                    | 1-2 x 1440 g a.e./ha <sup>2</sup>                         |                      |                |      |         |         |
| Test design                  | Endpoint (lab.)                    | Scenario                                                  | BBCH                 | E <sub>f</sub> | SV   | ETR     | Trigger |
|                              |                                    |                                                           | 10 - 49 <sup>3</sup> | 1              | 0.9  | <0.0031 |         |
|                              |                                    |                                                           | ≥ 70                 | 1              | 0.9  | <0.0031 |         |
| <b>Fruiting vegetables 2</b> |                                    |                                                           |                      |                |      |         |         |
| Acute oral toxicity          | LD <sub>50</sub> > 412 µg a.e./bee | treated crop                                              | < 10                 | 1              | 0.03 | <0.0001 | 0.036   |
|                              |                                    |                                                           | 10 - 49 <sup>3</sup> | 1              | 2.3  | <0.0080 |         |
|                              |                                    |                                                           | ≥ 70                 | 1              | 0    | <0.0000 |         |
|                              |                                    | Weeds                                                     | < 10                 | 1              | 6.5  | <0.0227 |         |
|                              |                                    |                                                           | 10 - 49 <sup>3</sup> | 1              | 6.5  | <0.0227 |         |
|                              |                                    |                                                           | ≥ 70                 | 0.3            | 6.5  | <0.0068 |         |
|                              |                                    | field margin                                              | < 10                 | 0.0092         | 6.5  | <0.0002 |         |
|                              |                                    |                                                           | 10 - 49 <sup>3</sup> | 0.0092         | 6.5  | <0.0002 |         |
|                              |                                    |                                                           | ≥ 70                 | 0.0092         | 6.5  | <0.0002 |         |
|                              |                                    | adjacent crop                                             | < 10                 | 0.0033         | 11.2 | <0.0001 |         |
|                              |                                    |                                                           | 10 - 49 <sup>3</sup> | 0.0033         | 11.2 | <0.0001 |         |
|                              |                                    |                                                           | ≥ 70                 | 0.0033         | 11.2 | <0.0001 |         |
|                              |                                    | next crop                                                 | < 10                 | 1              | 0.9  | <0.0031 |         |
|                              |                                    |                                                           | 10 - 49 <sup>3</sup> | 1              | 0.9  | <0.0031 |         |
|                              |                                    |                                                           | ≥ 70                 | 1              | 0.9  | <0.0031 |         |

E<sub>f</sub>: exposure factor; SV: shortcut value; ETR: exposure toxicity ratio.

<sup>1</sup> Crop category chosen according to the recommendations of the EFSA GD on the Risk Assessment on Bees (2013) and the EFSA Screening Step and 1<sup>st</sup> Tier Calculator,

<sup>2</sup> Max. single application rate of 1440 g a.e./ha considered for risk calculation as it covers lower rates.

<sup>3</sup> Scenario only relevant for uses 6a and b for which the highest intended application rate is 1.08 kg a.s./ha.

**First-tier assessment (oral exposure) of the risk for bumble bees due to the use of MON 52276 –root vegetables**

| <b>Intended use</b>       |                                    | Root vegetables (Uses: 1, 2, 3, 6, 10) |                      |           |           |                   |                |  |
|---------------------------|------------------------------------|----------------------------------------|----------------------|-----------|-----------|-------------------|----------------|--|
| <b>Application method</b> |                                    | downward spraying                      |                      |           |           |                   |                |  |
| <b>Crop category</b>      |                                    | Root vegetables <sup>1</sup>           |                      |           |           |                   |                |  |
| <b>Active substance</b>   |                                    | Glyphosate                             |                      |           |           |                   |                |  |
| <b>Use pattern</b>        |                                    | 1-3 x 1440 g a.e./ha <sup>2</sup>      |                      |           |           |                   |                |  |
| <b>Test design</b>        | <b>Endpoint (lab.)</b>             | <b>Scenario</b>                        | <b>BBCH</b>          | <b>Ef</b> | <b>SV</b> | <b>ETR</b>        | <b>Trigger</b> |  |
| Acute oral toxicity       | LD <sub>50</sub> > 412 µg a.e./bee | treated crop                           | < 10                 | 1         | 0.9       | <0.0031           | 0.036          |  |
|                           |                                    |                                        | 10 - 39 <sup>3</sup> | 1         | 11.2      | <b>&lt;0.0391</b> |                |  |
|                           |                                    |                                        | ≥ 70                 | 1         | 0         | <0.0000           |                |  |
|                           |                                    | Weeds                                  | < 10                 | 1         | 6.5       | <0.0227           |                |  |
|                           |                                    |                                        | 10 - 39 <sup>3</sup> | 1         | 6.5       | <0.0227           |                |  |
|                           |                                    |                                        | ≥ 70                 | 0.3       | 6.5       | <0.0068           |                |  |
|                           |                                    | field margin                           | < 10                 | 0.0092    | 6.5       | <0.0002           |                |  |
|                           |                                    |                                        | 10 - 39 <sup>3</sup> | 0.0092    | 6.5       | <0.0002           |                |  |
|                           |                                    |                                        | ≥ 70                 | 0.0092    | 6.5       | <0.0002           |                |  |
|                           |                                    | adjacent crop                          | < 10                 | 0.0033    | 11.2      | <0.0001           |                |  |
|                           |                                    |                                        | 10 - 39 <sup>3</sup> | 0.0033    | 11.2      | <0.0001           |                |  |
|                           |                                    |                                        | ≥ 70                 | 0.0033    | 11.2      | <0.0001           |                |  |
| next crop                 | < 10                               | 1                                      | 0.9                  | <0.0031   |           |                   |                |  |
|                           | 10 - 39 <sup>3</sup>               | 1                                      | 0.9                  | <0.0031   |           |                   |                |  |
|                           | ≥ 70                               | 1                                      | 0.9                  | <0.0031   |           |                   |                |  |

Ef: exposure factor; SV: shortcut value; ETR: exposure toxicity ratio.

<sup>1</sup> Crop category chosen according to the recommendations of the EFSA GD on the Risk Assessment on Bees (2013) and the EFSA Screening Step and 1<sup>st</sup> Tier Calculator,<sup>2</sup> Max. single application rate of 1440 g a.e./ha considered for risk calculation as it covers lower rates.<sup>3</sup> Scenario only relevant for uses 6a and b for which the highest intended application rate is 1.08 kg a.s./ha.**First-tier assessment (oral exposure) of the risk for bumble bees due to the use of MON 52276 - tuber vegetables**

| <b>Intended use</b>       |                                    | Tuber vegetables (Uses: 1, 2, 3, 6, 10) |                      |           |           |            |                |
|---------------------------|------------------------------------|-----------------------------------------|----------------------|-----------|-----------|------------|----------------|
| <b>Application method</b> |                                    | downward spraying                       |                      |           |           |            |                |
| <b>Crop category</b>      |                                    | potatoes <sup>1</sup>                   |                      |           |           |            |                |
| <b>Active substance</b>   |                                    | Glyphosate                              |                      |           |           |            |                |
| <b>Use pattern</b>        |                                    | 1-3 x 1440 g a.e./ha <sup>2</sup>       |                      |           |           |            |                |
| <b>Test design</b>        | <b>Endpoint (lab.)</b>             | <b>Scenario</b>                         | <b>BBCH</b>          | <b>Ef</b> | <b>SV</b> | <b>ETR</b> | <b>Trigger</b> |
| Acute oral toxicity       | LD <sub>50</sub> > 412 µg a.e./bee | treated crop                            | < 10                 | 1         | 0.03      | <0.0001    | 0.036          |
|                           |                                    |                                         | 10 - 39 <sup>3</sup> | 1         | 2.3       | <0.0080    |                |
|                           |                                    |                                         | ≥ 70                 | 1         | 0         | <0.0000    |                |
|                           |                                    | Weeds                                   | < 10                 | 1         | 6.5       | <0.0227    |                |

| <b>Intended use</b>       | Tuber vegetables (Uses: 1, 2, 3, 6, 10) |               |                      |        |      |         |         |  |
|---------------------------|-----------------------------------------|---------------|----------------------|--------|------|---------|---------|--|
| <b>Application method</b> | downward spraying                       |               |                      |        |      |         |         |  |
| <b>Crop category</b>      | potatoes <sup>1</sup>                   |               |                      |        |      |         |         |  |
| <b>Active substance</b>   | Glyphosate                              |               |                      |        |      |         |         |  |
| <b>Use pattern</b>        | 1-3 x 1440 g a.e./ha <sup>2</sup>       |               |                      |        |      |         |         |  |
| Test design               | Endpoint (lab.)                         | Scenario      | BBCH                 | Ef     | SV   | ETR     | Trigger |  |
|                           |                                         |               | 10 - 39 <sup>3</sup> | 1      | 6.5  | <0.0227 |         |  |
|                           |                                         |               | ≥ 70                 | 0.3    | 6.5  | <0.0068 |         |  |
|                           |                                         | field margin  | < 10                 | 0.0092 | 6.5  | <0.0002 |         |  |
|                           |                                         |               | 10 - 39 <sup>3</sup> | 0.0092 | 6.5  | <0.0002 |         |  |
|                           |                                         |               | ≥ 70                 | 0.0092 | 6.5  | <0.0002 |         |  |
|                           |                                         | adjacent crop | < 10                 | 0.0033 | 11.2 | <0.0001 |         |  |
|                           |                                         |               | 10 - 39 <sup>3</sup> | 0.0033 | 11.2 | <0.0001 |         |  |
|                           |                                         |               | ≥ 70                 | 0.0033 | 11.2 | <0.0001 |         |  |
|                           |                                         | next crop     | < 10                 | 1      | 0.9  | <0.0031 |         |  |
|                           |                                         |               | 10 - 39 <sup>3</sup> | 1      | 0.9  | <0.0031 |         |  |
|                           |                                         |               | ≥ 70                 | 1      | 0.9  | <0.0031 |         |  |

Ef: exposure factor; SV: shortcut value; ETR: exposure toxicity ratio.

<sup>1</sup> Crop category chosen according to the recommendations of the EFSA GD on the Risk Assessment on Bees (2013) and the EFSA Screening Step and 1<sup>st</sup> Tier Calculator

<sup>2</sup> Max. single application rate of 1440 g a.e./ha considered for risk calculation as it covers lower rates.

<sup>3</sup> Scenario only relevant for uses 6a and b for which the highest intended application rate is 1.08 kg a.s./ha.

**First-tier assessment (oral exposure) of the risk for bumble bees due to the use of MON 52276 - Bulb vegetables**

| <b>Intended use</b>       |                                    | Bulb vegetables (Uses: 1, 2, 3, 6, 10) |                      |        |      |         |         |
|---------------------------|------------------------------------|----------------------------------------|----------------------|--------|------|---------|---------|
| <b>Application method</b> |                                    | downward spraying                      |                      |        |      |         |         |
| <b>Crop category</b>      |                                    | bulb vegetables <sup>1</sup>           |                      |        |      |         |         |
| <b>Active substance</b>   |                                    | Glyphosate                             |                      |        |      |         |         |
| <b>Use pattern</b>        |                                    | 1-2 x 1440 g a.e./ha <sup>2</sup>      |                      |        |      |         |         |
| Test design               | Endpoint (lab.)                    | Scenario                               | BBCH                 | Ef     | SV   | ETR     | Trigger |
| Acute oral toxicity       | LD <sub>50</sub> > 412 µg a.e./bee | treated crop                           | < 10                 | 1      | 0.9  | <0.0031 | 0.036   |
|                           |                                    |                                        | 10 - 39 <sup>3</sup> | 1      | 11.2 | <0.0391 |         |
|                           |                                    |                                        | ≥ 70                 | 1      | 0    | <0.0000 |         |
|                           |                                    | Weeds                                  | < 10                 | 1      | 6.5  | <0.0227 |         |
|                           |                                    |                                        | 10 - 39 <sup>3</sup> | 1      | 6.5  | <0.0227 |         |
|                           |                                    |                                        | ≥ 70                 | 0.6    | 6.5  | <0.0136 |         |
|                           |                                    | field margin                           | < 10                 | 0.0092 | 6.5  | <0.0002 |         |
|                           |                                    |                                        | 10 - 39 <sup>3</sup> | 0.0092 | 6.5  | <0.0002 |         |
|                           |                                    |                                        | ≥ 70                 | 0.0092 | 6.5  | <0.0002 |         |
|                           |                                    | adjacent crop                          | < 10                 | 0.0033 | 11.2 | <0.0001 |         |
|                           |                                    |                                        | 10 - 39 <sup>3</sup> | 0.0033 | 11.2 | <0.0001 |         |
|                           |                                    |                                        | ≥ 70                 | 0.0033 | 11.2 | <0.0001 |         |
|                           |                                    | next crop                              | < 10                 | 1      | 0.9  | <0.0031 |         |
|                           |                                    |                                        | 10 - 39 <sup>3</sup> | 1      | 0.9  | <0.0031 |         |
|                           |                                    |                                        | ≥ 70                 | 1      | 0.9  | <0.0031 |         |

Ef: exposure factor; SV: shortcut value; ETR: exposure toxicity ratio.

<sup>1</sup> Crop category chosen according to the recommendations of the EFSA GD on the Risk Assessment on Bees (2013) and the EFSA Screening Step and 1<sup>st</sup> Tier Calculator

<sup>2</sup> Max. single application rate of 1440 g a.e./ha considered for risk calculation as it covers lower rates.

<sup>3</sup> Scenario only relevant for uses 6a and b for which the highest intended application rate is 1.08 kg a.s./ha.

**First-tier assessment (oral exposure) of the risk for bumble bees due to the use of MON 52276 - Brassica, leafy and stem vegetables**

| <b>Intended use</b>       |                                    | Brassica, leafy vegetables, stem vegetables (Uses: 1, 2, 3, 6, 10) |                      |    |      |         |         |
|---------------------------|------------------------------------|--------------------------------------------------------------------|----------------------|----|------|---------|---------|
| <b>Application method</b> |                                    | downward spraying                                                  |                      |    |      |         |         |
| <b>Crop category</b>      |                                    | leafy vegetables, lettuce <sup>1</sup>                             |                      |    |      |         |         |
| <b>Active substance</b>   |                                    | Glyphosate                                                         |                      |    |      |         |         |
| <b>Use pattern</b>        |                                    | 1-3 x 1440 g a.e./ha <sup>2</sup>                                  |                      |    |      |         |         |
| Test design               | Endpoint (lab.)                    | Scenario                                                           | BBCH                 | Ef | SV   | ETR     | Trigger |
| <b>Leafy vegetables</b>   |                                    |                                                                    |                      |    |      |         |         |
| Acute oral toxicity       | LD <sub>50</sub> > 412 µg a.e./bee | treated crop                                                       | < 10                 | 1  | 0.9  | <0.0031 | 0.036   |
|                           |                                    |                                                                    | 10 - 49 <sup>3</sup> | 1  | 11.2 | <0.0391 |         |

| <b>Intended use</b>       |                      | Brassica, leafy vegetables, stem vegetables<br>(Uses: 1, 2, 3, 6, 10) |                                    |              |      |         |         |      |         |       |
|---------------------------|----------------------|-----------------------------------------------------------------------|------------------------------------|--------------|------|---------|---------|------|---------|-------|
| <b>Application method</b> |                      | downward spraying                                                     |                                    |              |      |         |         |      |         |       |
| <b>Crop category</b>      |                      | leafy vegetables, lettuce <sup>1</sup>                                |                                    |              |      |         |         |      |         |       |
| <b>Active substance</b>   |                      | Glyphosate                                                            |                                    |              |      |         |         |      |         |       |
| <b>Use pattern</b>        |                      | 1-3 x 1440 g a.e./ha <sup>2</sup>                                     |                                    |              |      |         |         |      |         |       |
| Test design               | Endpoint (lab.)      | Scenario                                                              | BBCH                               | Ef           | SV   | ETR     | Trigger |      |         |       |
|                           |                      | Weeds                                                                 | ≥ 70                               | 1            | 0    | <0.0000 | 0.036   |      |         |       |
|                           |                      |                                                                       | < 10                               | 1            | 6.5  | <0.0227 |         |      |         |       |
|                           |                      |                                                                       | 10 - 49 <sup>3</sup>               | 1            | 6.5  | <0.0227 |         |      |         |       |
|                           |                      | field margin                                                          | ≥ 70                               | 0.3          | 6.5  | <0.0068 |         |      |         |       |
|                           |                      |                                                                       | < 10                               | 0.0092       | 6.5  | <0.0002 |         |      |         |       |
|                           |                      |                                                                       | 10 - 49                            | 0.0092       | 6.5  | <0.0002 |         |      |         |       |
|                           |                      | adjacent crop                                                         | ≥ 70                               | 0.0092       | 6.5  | <0.0002 |         |      |         |       |
|                           |                      |                                                                       | < 10                               | 0.0033       | 11.2 | <0.0001 |         |      |         |       |
|                           |                      |                                                                       | 10 - 49 <sup>3</sup>               | 0.0033       | 11.2 | <0.0001 |         |      |         |       |
|                           |                      | next crop                                                             | ≥ 70                               | 0.0033       | 11.2 | <0.0001 |         |      |         |       |
|                           |                      |                                                                       | < 10                               | 1            | 0.9  | <0.0031 |         |      |         |       |
|                           |                      |                                                                       | 10 - 49 <sup>3</sup>               | 1            | 0.9  | <0.0031 |         |      |         |       |
|                           |                      |                                                                       |                                    |              | ≥ 70 | 1       |         | 0.9  | <0.0031 |       |
|                           |                      | <b>Lettuce</b>                                                        |                                    |              |      |         |         |      |         |       |
|                           |                      | Acute oral toxicity                                                   | LD <sub>50</sub> > 412 µg a.e./bee | treated crop | < 10 | 1       |         | 0.03 | <0.0001 | 0.036 |
| 10 - 49 <sup>3</sup>      | 1                    |                                                                       |                                    |              | 2.3  | <0.0080 |         |      |         |       |
| ≥ 70                      | 1                    |                                                                       |                                    |              | 0    | <0.0000 |         |      |         |       |
| Weeds                     | < 10                 |                                                                       |                                    | 1            | 6.5  | <0.0227 |         |      |         |       |
|                           | 10 - 49 <sup>3</sup> |                                                                       |                                    | 1            | 6.5  | <0.0227 |         |      |         |       |
|                           | ≥ 70                 |                                                                       |                                    | 0.3          | 6.5  | <0.0068 |         |      |         |       |
| field margin              | < 10                 |                                                                       |                                    | 0.0092       | 6.5  | <0.0002 |         |      |         |       |
|                           | 10 - 49 <sup>3</sup> |                                                                       |                                    | 0.0092       | 6.5  | <0.0002 |         |      |         |       |
|                           | ≥ 70                 |                                                                       |                                    | 0.0092       | 6.5  | <0.0002 |         |      |         |       |
| adjacent crop             | < 10                 |                                                                       |                                    | 0.0033       | 11.2 | <0.0001 |         |      |         |       |
|                           | 10 - 49 <sup>3</sup> |                                                                       |                                    | 0.0033       | 11.2 | <0.0001 |         |      |         |       |
|                           | ≥ 70                 |                                                                       |                                    | 0.0033       | 11.2 | <0.0001 |         |      |         |       |
| next crop                 | < 10                 |                                                                       |                                    | 1            | 0.9  | <0.0031 |         |      |         |       |
|                           | 10 - 49 <sup>3</sup> |                                                                       |                                    | 1            | 0.9  | <0.0031 |         |      |         |       |
|                           | ≥ 70                 |                                                                       |                                    | 1            | 0.9  | <0.0031 |         |      |         |       |

Ef: exposure factor; SV: shortcut value; ETR: exposure toxicity ratio.

<sup>1</sup> Crop category chosen according to the recommendations of the EFSA GD on the Risk Assessment on Bees (2013) and the EFSA Screening Step and 1<sup>st</sup> Tier Calculator,

<sup>2</sup> Max. single application rate of 1440 g a.e./ha considered for risk calculation as it covers lower rates.

<sup>3</sup> Scenario only relevant for uses 6a and b for which the highest intended application rate is 1.08 kg a.s./ha.



**First-tier assessment (oral exposure) of the risk for bumble bees due to the use of MON 52276 - Sugar beet**

| <b>Intended use</b>       |                                    | Sugar beet (Uses: 1, 2, 3, 10)    |      |        |      |         |         |
|---------------------------|------------------------------------|-----------------------------------|------|--------|------|---------|---------|
| <b>Application method</b> |                                    | downward spraying                 |      |        |      |         |         |
| <b>Crop category</b>      |                                    | sugar beet <sup>1</sup>           |      |        |      |         |         |
| <b>Active substance</b>   |                                    | Glyphosate                        |      |        |      |         |         |
| <b>Use pattern</b>        |                                    | 1-3 x 1440 g a.e./ha <sup>2</sup> |      |        |      |         |         |
| Test design               | Endpoint (lab.)                    | Scenario                          | BBCH | Ef     | SV   | ETR     | Trigger |
| Acute oral toxicity       | LD <sub>50</sub> > 412 µg a.e./bee | treated crop                      | < 10 | 1      | 0.9  | <0.0031 | 0.036   |
|                           |                                    |                                   | ≥ 70 | 1      | 0    | <0.0000 |         |
|                           |                                    | Weeds                             | < 10 | 1      | 6.5  | <0.0227 |         |
|                           |                                    |                                   | ≥ 70 | 0.25   | 6.5  | <0.0057 |         |
|                           |                                    | field margin                      | < 10 | 0.0092 | 6.5  | <0.0002 |         |
|                           |                                    |                                   | ≥ 70 | 0.0092 | 6.5  | <0.0002 |         |
|                           |                                    | adjacent crop                     | < 10 | 0.0033 | 11.2 | <0.0001 |         |
|                           |                                    |                                   | ≥ 70 | 0.0033 | 11.2 | <0.0001 |         |
|                           |                                    | next crop                         | < 10 | 1      | 0.9  | <0.0031 |         |
|                           |                                    |                                   | ≥ 70 | 1      | 0.9  | <0.0031 |         |

Ef: exposure factor; SV: shortcut value; ETR: exposure toxicity ratio.

<sup>1</sup> Crop category chosen according to the recommendations of the EFSA GD on the Risk Assessment on Bees (2013) and the EFSA Screening Step and 1<sup>st</sup> Tier Calculator,

<sup>2</sup> Max. single application rate of 1440 g a.e./ha considered for risk calculation as it covers lower rates.

**First-tier assessment (oral exposure) of the risk for bumble bees due to the use of MON 52276 - legume vegetables**

| <b>Intended use</b>       |                                    | Legume vegetables (Uses: 1, 2, 3, 6, 10) |                      |        |      |                   |         |
|---------------------------|------------------------------------|------------------------------------------|----------------------|--------|------|-------------------|---------|
| <b>Application method</b> |                                    | downward spraying                        |                      |        |      |                   |         |
| <b>Crop category</b>      |                                    | pulses <sup>1</sup>                      |                      |        |      |                   |         |
| <b>Active substance</b>   |                                    | Glyphosate                               |                      |        |      |                   |         |
| <b>Use pattern</b>        |                                    | 1-2 x 1440 g a.e./ha <sup>2</sup>        |                      |        |      |                   |         |
| Test design               | Endpoint (lab.)                    | Scenario                                 | BBCH                 | Ef     | SV   | ETR               | Trigger |
| Acute oral toxicity       | LD <sub>50</sub> > 412 µg a.e./bee | treated crop                             | < 10                 | 1      | 0.9  | <0.0031           | 0.03    |
|                           |                                    |                                          | 10 - 49 <sup>3</sup> | 1      | 11.2 | <b>&lt;0.0391</b> |         |
|                           |                                    |                                          | ≥ 70                 | 1      | 0    | <0.0000           |         |
|                           |                                    | Weeds                                    | < 10                 | 1      | 6.5  | <0.0227           |         |
|                           |                                    |                                          | 10 - 49 <sup>3</sup> | 1      | 6.5  | <0.0227           |         |
|                           |                                    |                                          | ≥ 70                 | 0.3    | 6.5  | <0.0068           |         |
|                           |                                    | field margin                             | < 10                 | 0.0092 | 6.5  | <0.0002           |         |
|                           |                                    |                                          | 10 - 49 <sup>3</sup> | 0.0092 | 6.5  | <0.0002           |         |
|                           |                                    |                                          | ≥ 70                 | 0.0092 | 6.5  | <0.0002           |         |
|                           |                                    | adjacent crop                            | < 10                 | 0.0033 | 11.2 | <0.0001           |         |

|                           |                                          |                 |                      |           |           |            |                |
|---------------------------|------------------------------------------|-----------------|----------------------|-----------|-----------|------------|----------------|
| <b>Intended use</b>       | Legume vegetables (Uses: 1, 2, 3, 6, 10) |                 |                      |           |           |            |                |
| <b>Application method</b> | downward spraying                        |                 |                      |           |           |            |                |
| <b>Crop category</b>      | pulses <sup>1</sup>                      |                 |                      |           |           |            |                |
| <b>Active substance</b>   | Glyphosate                               |                 |                      |           |           |            |                |
| <b>Use pattern</b>        | 1-2 x 1440 g a.e./ha <sup>2</sup>        |                 |                      |           |           |            |                |
| <b>Test design</b>        | <b>Endpoint (lab.)</b>                   | <b>Scenario</b> | <b>BBCH</b>          | <b>Ef</b> | <b>SV</b> | <b>ETR</b> | <b>Trigger</b> |
|                           |                                          |                 | 10 - 49 <sup>3</sup> | 0.0033    | 11.2      | <0.0001    |                |
|                           |                                          |                 | ≥ 70                 | 0.0033    | 11.2      | <0.0001    |                |
|                           |                                          | next crop       | < 10                 | 1         | 0.9       | <0.0031    |                |
|                           |                                          | next crop       | 10 - 49 <sup>3</sup> | 1         | 0.9       | <0.0031    |                |
|                           |                                          | next crop       | ≥ 70                 | 1         | 0.9       | <0.0031    |                |

Ef: exposure factor; SV: shortcut value; ETR: exposure toxicity ratio.

<sup>1</sup> Crop category chosen according to the recommendations of the EFSA GD on the Risk Assessment on Bees (2013) and the EFSA Screening Step and 1<sup>st</sup> Tier Calculator,

<sup>2</sup> Max. single application rate of 1440 g a.e./ha considered for risk calculation as it covers lower rates.

<sup>3</sup> Scenario only relevant for uses 6a and b for which the highest intended application rate is 1.08 kg a.s./ha.

### Assessment of the risk for bees (honey and bumble bees) due to the use of MON 52276 considering exposure to metabolite AMPA

| category | scenario  | BBCH    | Honeybee       |         | Bumble bee     |         |
|----------|-----------|---------|----------------|---------|----------------|---------|
|          |           |         | ETRmetabolite* | trigger | ETRmetabolite* | trigger |
| acute    | next crop | weed<10 | 0.02           | 0.2     | 0.01           | 0.036   |
| chronic  | next crop | weed<10 | 0.01           | 0.03    |                |         |
| larva    | next crop | weed<10 | 0.01           | 0.2     |                |         |
| acute    | next crop | weed≥10 | 0.02           | 0.2     | 0.01           | 0.036   |
| chronic  | next crop | weed≥10 | 0.01           | 0.03    |                |         |
| larva    | next crop | weed≥10 | 0.01           | 0.2     |                |         |

\* based on an interim report for rotational crops in the residue section; note that a data gap was identified in the residue section for rotational crop studies. Therefore, these calculations are considered only as indicative (but not final) risk assessments (data gap).

### Effects on other arthropod species (Regulation (EU) N° 283/2013, Annex Part A, point 8.3.2 and Regulation (EU) N° 284/2013 Annex Part A, point 10.3.2)

#### Laboratory tests with standard sensitive species

| Species                  | Test Substance | End point                                                         | Toxicity                                                                                                   |
|--------------------------|----------------|-------------------------------------------------------------------|------------------------------------------------------------------------------------------------------------|
| <i>Typhlodromus pyri</i> | MON 52276      | Mortality, LR <sub>50</sub><br><br>Reproduction, ER <sub>50</sub> | 100% mortality at 10 L MON 52276/ha (3.6 kg a.e/ha) on day 4<br><br>No reproduction endpoint (supportive)* |

| Species                      | Test Substance | End point                                                         | Toxicity                                                                                                    |
|------------------------------|----------------|-------------------------------------------------------------------|-------------------------------------------------------------------------------------------------------------|
| <i>Aphidius rhopalosiphi</i> | MON 52276      | Mortality, LR <sub>50</sub><br><br>Reproduction, ER <sub>50</sub> | 100% mortality at 10 L MON 52276/ha (3.6 kg a.e./ha) at 24 h<br><br>No reproduction endpoint (supportive)** |
| Additional species           |                |                                                                   |                                                                                                             |
| <i>Poecilus cupreus</i>      | MON 52276      | Mortality, LR <sub>50</sub>                                       | > 10 L/ha (3600 g a.e./ha)                                                                                  |
| <i>Pardosa sp.</i>           | MON 52276      | Mortality, LR <sub>50</sub>                                       | > 10 L/ha (3600 g a.e./ha)***                                                                               |

a.e.: glyphosate acid equivalent

\* guideline used does not meet current standards. Alteration of moving behaviour due to wet sticky layer on the treated glass plates.

\*\*guideline used does not meet current standards. Control with 60 instead of 100 mites.

\*\*\*reliable for application from the the end of June onwards. Supportive for application from the beginning of August onwards (sensitivity of the collected spiders may be lesser than for over-wintered individuals)

### First tier risk assessment

No reliable endpoint available to conduct a tier 1 risk assessment.

### Literature data on non-target-arthropods other than bees

No relevant and reliable, or reliable with restriction peer reviewed literature studies were found following revision of literature in accordance with the criteria agreed at the Pesticide Peer Review Experts' TC 82.

### Extended laboratory tests, aged residue tests

| Species                  | Life stage  | Test substance, substrate                                            | Time scale | Dose (g/ha) <sup>1,2</sup> | End point             | % effect <sup>3</sup>                                                                                                                                       | ER <sub>50</sub>                                    |
|--------------------------|-------------|----------------------------------------------------------------------|------------|----------------------------|-----------------------|-------------------------------------------------------------------------------------------------------------------------------------------------------------|-----------------------------------------------------|
| <i>Typhlodromus pyri</i> | proto-nymph | MON 52276<br><br>Leaf discs of French beans<br><br>Extended lab / 2D | 14d        | 3 to 16 L prod /ha         | Mortality (at 7d)     | LR <sub>50</sub> > 16 L/ha (40% at 16 L/ha) (5760 g a.e./ha)                                                                                                | ER <sub>50</sub> (repro) > 12 L/ha (4320 g a.e./ha) |
|                          |             |                                                                      |            |                            | Reproduction (at 14d) | ER <sub>50</sub> > 12L/ha (Reduction in no. of egg/female of 44.9 % at 12 L/ha and 56.5% at 16 L/ha) (4320 g a.e./ha)<br><br>NOER = 3 L/ha (1080 g a.e./ha) |                                                     |

| Species                      | Life stage | Test substance, substrate                      | Time scale | Dose (g/ha) <sup>1,2</sup>    | End point    | % effect <sup>3</sup>                         | ER <sub>50</sub>                            |
|------------------------------|------------|------------------------------------------------|------------|-------------------------------|--------------|-----------------------------------------------|---------------------------------------------|
| <i>Aphidius rhopalosiphi</i> | adult      | MON 52276 seedling barley<br>Extended lab / 3D | 2d+10d     | 4, 6, 8, 12 and 16 L prod./ha | Mortality    | LR <sub>50</sub> > 16.0 L/ha (5760 g a.e./ha) | ER <sub>50</sub> > 16 L/ha (5760 g a.e./ha) |
|                              |            |                                                |            |                               | reproduction | NOER > 16 L/ha (5760 g a.e./ha)               |                                             |

<sup>1</sup> indicate whether initial or aged residues

<sup>2</sup> for preparations indicate whether dose is expressed in units of a.s. or preparation

<sup>3</sup> indicate if positive percentages relate to adverse effects or not

a.e.: glyphosate acid equivalent

### Higher tier risk assessment covering all representative uses at 1800 g a.s./ha x 2 based on extended laboratory tests or aged residue tests

(worst case assumption made : maximum dose rate, maximum number of application, default multiple application factor set at 2)

| Species                 | ER <sub>50</sub> (g/ha) | In-field rate | Off-field rate   |
|-------------------------|-------------------------|---------------|------------------|
| <i>T. pyri</i>          | >4320                   | 3600          | 42.84 (1m / 2D)  |
| <i>A. rhopalosiphi</i>  | >5760                   |               | 428.4 (1m / 3D)  |
| <i>Poecilus cupreus</i> | >3600                   |               | 428.4 (1m / 2D)* |
| <i>Pardosa sp.</i>      | >3600                   |               | 428.4 (1m / 2D)* |

\*A vegetation distribution factor of 1 has been considered since these species are considered to be soil-dwelling arthropods.

|                                 |
|---------------------------------|
| Semi-field tests: None          |
| Field studies: None             |
| Additional specific tests: None |

### Effects on non-target soil meso- and macro fauna; effects on soil nitrogen transformation (Regulation (EU) N° 283/2013, Annex Part A, points 8.4, 8.5, and Regulation (EU) N° 284/2013 Annex Part A, points 10.4, 10.5)

| Test organism         | Test substance | Application method of test a.s./ OM    | Time scale   | End point                          | Toxicity                        |
|-----------------------|----------------|----------------------------------------|--------------|------------------------------------|---------------------------------|
| Earthworms            |                |                                        |              |                                    |                                 |
| <i>Eisenia fetida</i> | a.s.           | Mixed into substrate/ 10% peat content | Chronic 56 d | Mortality, growth and reproduction | NOEC = 473 mg a.e./kg d.w.soil* |

| Test organism                    | Test substance | Application method of test a.s./ OM       | Time scale      | End point                          | Toxicity                                                                                                                     |
|----------------------------------|----------------|-------------------------------------------|-----------------|------------------------------------|------------------------------------------------------------------------------------------------------------------------------|
| <i>Eisenia fetida</i>            | MON 52276      | Mixed into substrate/<br>10% peat content | Chronic<br>56 d | Mortality, growth and reproduction | NOEC = 123 mg PP/kg d.w. soil<br>(38 mg a.e./kg d.w.soil) *                                                                  |
| <i>Eisenia fetida</i>            | AMPA           | Mixed into substrate/<br>10% peat content | Chronic<br>56 d | Mortality, growth and reproduction | NOEC = 131.9 mg AMPA/kg d.w.soil<br>EC <sub>10</sub> = 220 mg AMPA/kg d.w.soil<br>EC <sub>20</sub> = 293 mg AMPA/kg d.w.soil |
| <b>Other soil macroorganisms</b> |                |                                           |                 |                                    |                                                                                                                              |
| <i>Folsomia candida</i>          | a.s.           | Mixed into substrate/<br>10% peat content | Chronic<br>28 d | Mortality and reproduction         | NOEC = 587 mg a.e./kg d.w.soil*                                                                                              |
| <i>Folsomia candida</i>          | AMPA           | Mixed into substrate/<br>5% peat content  | Chronic<br>28 d | Mortality and reproduction         | NOEC = 315 mg a.e./kg d.w.soil*                                                                                              |
| <i>Folsomia candida</i>          | MON 52276      | Mixed into substrate/<br>5% peat content  | Chronic<br>28 d | Mortality and reproduction         | NOEC = 1802 mg a.e./kg d.w. soil*                                                                                            |
| <i>Hypoaspis aculeifer</i>       | a.s.           | Mixed into substrate/<br>5% peat content  | Chronic<br>14 d | Mortality and reproduction         | NOEC = 473 mg a.e./kg d.w.soil*                                                                                              |
| <i>Hypoaspis aculeifer</i>       | AMPA           | Mixed into substrate/<br>5% peat content  | Chronic<br>14 d | Mortality and reproduction         | NOEC = 320 mg a.e./kg d.w.soil*                                                                                              |
| <i>Hypoaspis aculeifer</i>       | MON 52276      | Mixed into substrate/<br>5% peat content  | Chronic<br>14 d | Mortality and reproduction         | NOEC = 1001 mg a.e./kg d.w.soil                                                                                              |

\* Highest tested dose

a.s.: active substance; NOEC: no-observed effect concentration; EC<sub>10,20</sub>: concentration causing 10% or 20% effects; OM: organic matter.

### Literature data on soil organisms

No relevant and reliable, or reliable with restriction peer reviewed literature studies were found following revision of the literature in accordance with the criteria agreed at the Pesticide Peer Review Experts' TC 82.

Higher tier testing (e.g. modelling or field studies): None

|                         |           |                                                    |
|-------------------------|-----------|----------------------------------------------------|
| Nitrogen transformation | a.s.      | < 25% effect at Day 28 at 33.1 mg/kg dry soil      |
| Nitrogen transformation | MON 52276 | < 25% effect at Day 28 at 28.8 mg a.e./kg dry soil |
| Nitrogen transformation | AMPA      | < 25% effect at Day 28 at 80 mg/kg dry soil        |

**Literature data on soil microflora**

| Test item          | Test design              | Effects                                                                                                                                                                                                                                                                      |
|--------------------|--------------------------|------------------------------------------------------------------------------------------------------------------------------------------------------------------------------------------------------------------------------------------------------------------------------|
| glyphosate (acid)# | N-mineralisation, 28 day | No significant effects on NO <sub>3</sub> <sup>-</sup> formation and NH <sub>4</sub> <sup>+</sup> levels were determined for the applications rates of glyphosate at 1 kg/ha (corresponding to 1.33 mg/kg) and 5 kg/ha (corresponding to 6.67 mg/kg) compared to the control |

# Literature data eligible for risk assessment.

**Toxicity/exposure ratios for soil organisms**

Risk envelope approach covering all representative uses at 3600 g a.s./ha x 1

| Test organism                    | Test substance | Time scale | Soil PEC (PEC used) | TER   | Trigger |
|----------------------------------|----------------|------------|---------------------|-------|---------|
| <b>Earthworms</b>                |                |            |                     |       |         |
| <i>Eisenia fetida</i>            | a.s.           | Chronic    | 5.123 (accu)        | 92.3  | 5       |
| <i>Eisenia fetida</i>            | MON 52276      | Chronic    | 5.123 (accu)        | 7.4   | 5       |
| <i>Eisenia fetida</i>            | AMPA           | Chronic    | 6.845 (accu)        | 19.3  | 5       |
| <b>Other soil macroorganisms</b> |                |            |                     |       |         |
| <i>Folsomia candida</i>          | a.s.           | Chronic    | 5.123 (accu)        | 114.6 | 5       |
| <i>Folsomia candida</i>          | MON 52276      | Chronic    | 5.123 (accu)        | 351.7 | 5       |
| <i>Folsomia. candida</i>         | AMPA           | Chronic    | 6.845 (accu)        | 46.0  | 5       |
| <i>Hypospis aculeifer</i>        | a.s.           | Chronic    | 5.123 (accu)        | 92.3  | 5       |

| Test organism              | Test substance | Time scale | Soil PEC (PEC used) | TER   | Trigger |
|----------------------------|----------------|------------|---------------------|-------|---------|
| <i>Hypoaspis aculeifer</i> | MON 52276      | Chronic    | 5.123 (accu)        | 195.4 | 5       |
| <i>Hypoaspis aculeifer</i> | AMPA           | Chronic    | 6.845 (accu)        | 46.7  | 5       |

a.s.: active substance; accu: accumulated; PEC: predicted environmental concentration; TER: toxicity/exposure ratio.

### Effects on terrestrial non target higher plants (Regulation (EU) N° 283/2013, Annex Part A, point 8.6 and Regulation (EU) N° 284/2013 Annex Part A, point 10.6)

#### Screening data

|                                                                                                     |
|-----------------------------------------------------------------------------------------------------|
| Not required for herbicides or plant growth regulators as ER <sub>50</sub> tests should be provided |
|-----------------------------------------------------------------------------------------------------|

#### Laboratory dose response tests

| Species                                                                                                                                                                                                                                                    | Test substance | ER <sub>50</sub> (g a.e. /ha) vegetative vigour | ER <sub>50</sub> (g a.e. /ha) emergence | Exposure (g a.e. /ha) | TER                             | Trigger |
|------------------------------------------------------------------------------------------------------------------------------------------------------------------------------------------------------------------------------------------------------------|----------------|-------------------------------------------------|-----------------------------------------|-----------------------|---------------------------------|---------|
| Soya bean, Lettuce, Radish, Tomato, Cucumber, Cabbage, Oat, Ryegrass, Corn, Onion                                                                                                                                                                          | Glyphosate     | 145.7 (tomato, dry weight)                      | -                                       | -                     | -                               | -       |
| <i>Cucumis sativus</i><br><i>Brassica napus</i><br><i>Raphanus sativus</i><br><i>Glycine max</i><br><i>Helianthus annuus</i><br><i>Lycopersicon esculentum</i><br><i>Zea mays</i><br><i>Triticum aestivum</i><br><i>Avena sativa</i><br><i>Allium cepa</i> | MON 52276      | -                                               | > 3610                                  | 3 x 720               | >181                            | 5       |
|                                                                                                                                                                                                                                                            |                |                                                 |                                         | 2 x 1440              | >90.5                           |         |
|                                                                                                                                                                                                                                                            |                |                                                 |                                         | 2 x 1800              | >72.4                           |         |
| <i>Zea mays</i><br><i>Avena sativa</i><br><i>Allium cepa</i><br><i>Triticum aestivum</i><br><i>Cucumis sativus</i><br><i>Brassica napus</i><br><i>Raphanus sativus</i><br><i>Glycine max</i><br><i>Helianthus annuus</i><br><i>Lycopersicon esulentum</i>  | MON 52276      | <b>28.4*</b><br>(cucumber, shoot length)        | -                                       | 3 x 720               | <b>1.42</b>                     | 5       |
|                                                                                                                                                                                                                                                            |                |                                                 |                                         |                       | 6.92 (5m)                       |         |
|                                                                                                                                                                                                                                                            |                |                                                 |                                         |                       | <b>2.85</b><br>(50% drift red.) |         |
|                                                                                                                                                                                                                                                            |                |                                                 |                                         |                       | 5.70 (75% drift red.)           |         |

| Species | Test substance | ER <sub>50</sub> (g a.e. /ha) vegetative vigour | ER <sub>50</sub> (g a.e. /ha) emergence | Exposure (g a.e. /ha)           | TER         | Trigger |
|---------|----------------|-------------------------------------------------|-----------------------------------------|---------------------------------|-------------|---------|
|         |                |                                                 |                                         | 2 x 1440                        | <b>0.71</b> | 5       |
|         |                |                                                 | <b>3.46</b><br>(5m)                     |                                 |             |         |
|         |                |                                                 | 6.80<br>(10m)                           |                                 |             |         |
|         |                |                                                 | <b>1.42</b><br>(50% drift red.)         |                                 |             |         |
|         |                |                                                 | 6.92 (5m + 50% drift red.)              |                                 |             |         |
|         |                |                                                 | <b>2.85</b><br>(75% drift red.)         |                                 |             |         |
|         |                |                                                 | 13.84 (5m + 75% drift red.)             |                                 |             |         |
|         |                |                                                 | 7.12 (90% drift red.)                   |                                 |             |         |
|         |                |                                                 | 2 x 1800                                | <b>0.57</b>                     | 5           |         |
|         |                |                                                 |                                         | <b>2.77</b><br>(5m)             |             |         |
|         |                |                                                 |                                         | 5.44<br>(10m)                   |             |         |
|         |                |                                                 |                                         | <b>1.14</b><br>(50% drift red.) |             |         |
|         |                |                                                 |                                         | 5.54 (5m + 50% drift red.)      |             |         |
|         |                |                                                 |                                         | <b>2.28</b><br>(75% drift red.) |             |         |
|         |                |                                                 |                                         | 11.07<br>(5m +                  |             |         |



| Species                                                                                                                                                                                                                                                   | Test substance | ER <sub>50</sub> (g a.e. /ha) vegetative vigour                     | ER <sub>50</sub> (g a.e. /ha) emergence | Exposure (g a.e. /ha)                                     | TER                   | Trigger |
|-----------------------------------------------------------------------------------------------------------------------------------------------------------------------------------------------------------------------------------------------------------|----------------|---------------------------------------------------------------------|-----------------------------------------|-----------------------------------------------------------|-----------------------|---------|
|                                                                                                                                                                                                                                                           |                |                                                                     |                                         |                                                           | 75% drift red.)       |         |
|                                                                                                                                                                                                                                                           |                |                                                                     |                                         |                                                           | 5.70 (90% drift red.) |         |
| <i>Zea mays</i><br><i>Avena sativa</i><br><i>Allium cepa</i><br><i>Triticum aestivum</i><br><i>Cucumis sativus</i><br><i>Brassica napus</i><br><i>Raphanus sativus</i><br><i>Glycine max</i><br><i>Helianthus annuus</i><br><i>Lycopersicon esulentum</i> | MON 52276      | 69.87( <i>Lycopersicon esculentum</i> (tomato), shoot fresh weight) | -                                       | See above (based on the lower endpoint of 28.4 g a.e./ha) |                       |         |
| Extended laboratory studies: -<br>Semi-field and field test: -                                                                                                                                                                                            |                |                                                                     |                                         |                                                           |                       |         |

\* Study considered reliable with restrictions and used in the risk assessment.

Note: as regards the drift reduction as risk management measure, a risk envelop strategy was followed. Great details are included in section B.9.12 of the RAR (Glyphosate\_RAR\_29\_Volume\_3CP\_MON 52276\_B-9).

### Literature data on non-target terrestrial plants

No relevant and reliable, or reliable with restriction peer reviewed literature studies were found following revision of the literature in accordance with the criteria agreed at the Pesticides Peer Review Experts' TC 82.

### Effects on biological methods for sewage treatment (Regulation (EU) N° 283/2013, Annex Part A, point 8.8)

| Test type/organism    | end point                        |
|-----------------------|----------------------------------|
| Activated sludge      | EC <sub>50</sub> > 100 mg a.e./L |
| <i>Pseudomonas sp</i> | No data                          |

### Monitoring data (Regulation (EU) N° 283/2013, Annex Part A, point 8.9 and Regulation (EU) N° 284/2013, Annex Part A, point 10.8)

|                                                                            |
|----------------------------------------------------------------------------|
| Available monitoring data concerning adverse effect of the a.s.<br>No data |
|----------------------------------------------------------------------------|

Available monitoring data concerning effect of the PPP.  
No data.

**Definition of the residue for monitoring (Regulation (EU) N° 283/2013, Annex Part A, point 7.4.2) Ecotoxicologically relevant compounds<sup>1</sup>**

| Compartment |                   |
|-------------|-------------------|
| soil        | Glyphosate, AMPA  |
| water       | Glyphosate, AMPA* |
| sediment    | Glyphosate, AMPA* |
| groundwater | Glyphosate, AMPA* |

\* AMPA is not ecotoxicologically relevant for the compartments water, sediment and groundwater. For precautionary reasons AMPA is proposed as relevant residue due to the frequent detections in surface waters and groundwater and the widespread intended uses of glyphosate in almost all crops.

**Classification and labelling with regard to ecotoxicological data (Regulation (EU) N° 283/2013, Annex Part A, Section 10)**

Substance

glyphosate

Harmonised classification according to Regulation (EC) No 1272/2008 and its Adaptations to Technical Process [Table 3.1 of Annex VI of Regulation (EC) No 1272/2008 as amended]<sup>20, 21</sup>

Aquatic Chronic 2  
H411

According to the peer review, criteria for harmonised classification according to Regulation (EC) No 1272/2008 may be met for:

Aquatic Chronic 2  
H411

<sup>20</sup> Regulation (EC) No 1272/2008 of the European Parliament and of the Council of 16 December 2008 on classification, labelling and packaging of substances and mixtures, amending and repealing Directives 67/548/EEC and 1999/45/EC, and amending Regulation (EC) No 1907/2006. OJ L 353, 31.12.2008, 1-1355.

<sup>21</sup> ECHA (European Chemicals Agency), 2022. Committee for Risk Assessment (RAC) Opinion proposing harmonised classification and labelling at EU level of glyphosate (ISO); N-(phosphonomethyl)glycine. CLH-O-0000007122-85-01/F. Adopted 30 May 2022. Available at [www.echa.europa.eu](http://www.echa.europa.eu)
